# Supplementary material for: Social Prescribing: Systematic Review of the Effectiveness of Psychosocial Community Referral Interventions in Primary Care
Source: PubMed Central journal article supplement (PMC9389950; doi:10.5334/ijic.6472), 2022-08-19
Supplement: ijic-22-3-6472-s1.pdf [file ijic-22-3-6472-s1.pdf]

## Appendix 1: Search strategies

| Initial search                   |                                                                                                                                                                                                                                                                                                                                                |                    |             |                                       |
|----------------------------------|------------------------------------------------------------------------------------------------------------------------------------------------------------------------------------------------------------------------------------------------------------------------------------------------------------------------------------------------|--------------------|-------------|---------------------------------------|
| Database                         | Search string, limits                                                                                                                                                                                                                                                                                                                          | Search time frame  | Search date | Results (number of citations)         |
| OVID MEDLINE                     | 1. social prescri*.mp.<br>2. community referral*.mp.<br>3. social.ti,ab.<br>4. psychosocial.ti,ab.<br>5. referral.ti,ab.<br>6. primary care.ti,ab.<br>7. 3 or 4<br>8. 5 and 6 and 7<br>9. 1 or 2 or 8<br>10. 9 and 2000:2020.(sa_year).                                                                                                        | 2000-2020          | 07.05.2020  | 841                                   |
| OVID EMBASE                      | 1. social prescri*.mp.<br>2. community referral*.mp.<br>3. social.ti,ab.<br>4. psychosocial.ti,ab.<br>5. referral.ti,ab.<br>6. primary care.ti,ab.<br>7. 3 or 4<br>8. 5 and 6 and 7<br>9. 1 or 2 or 8<br>10. 9 and 2000:2020.(sa_year).                                                                                                        | 2000-2020          | 07.05.2020  | 1409                                  |
| EBSCO CINAHL                     | (TI "social prescri*" OR AB "social prescri*") OR (TI "community referral*" OR AB "community referral*") OR (((TI psychosocial OR AB psychosocial) OR (TI social OR AB social)) AND (TI referral* OR AB referral*)) AND (TI "primary care" OR AB "primary care")                                                                               | 2000-2020          | 07.05.2020  | 793                                   |
| EBSCO SocIndex                   | (TI "social prescri*" OR AB "social prescri*") OR (TI "community referral*" OR AB "community referral*") OR (((TI psychosocial OR AB psychosocial) OR (TI social OR AB social)) AND (TI referral* OR AB referral*)) AND (TI "primary care" OR AB "primary care")                                                                               | 2000-2020          | 07.05.2020  | 111                                   |
| Social Care Online               | social prescribing OR community referral                                                                                                                                                                                                                                                                                                       | 2000-2020          | 07.05.2020  | 397                                   |
| Cochrane:<br>- CDSR<br>- CENTRAL | 1. social NEXT prescri*:ti,ab,kw<br>2. community NEXT referral*:ti,ab,kw<br>3. "social":ti,ab,kw<br>4. "psychosocial":ti,ab,kw<br>5. "referral": ti,ab,kw<br>6. "primary care":ti,ab,kw<br>7. 3 or 4<br>8. 5 and 6 and 7<br>9. 1 or 2 or 8<br>10. 9 and Publication Year from (2000 to 2020)                                                   | 2000-2020          | 07.05.2020  | 12 reviews<br>368 trials<br>380 total |
| Google Scholar                   | intitle:"social prescribing"<br><br>Limits: no patents / citations, time frame 2000-2020                                                                                                                                                                                                                                                       | 2000-2020          | 18.05.2020  | 196                                   |
| Update search                    |                                                                                                                                                                                                                                                                                                                                                |                    |             |                                       |
| Database                         | Search string, limits                                                                                                                                                                                                                                                                                                                          | Search time frame  | Search date | Results (number of citations)         |
| OVID MEDLINE                     | 1. social prescri*.mp.<br>2. community referral*.mp.<br>3. social.ti,ab.<br>4. psychosocial.ti,ab.<br>5. referral.ti,ab.<br>6. primary care.ti,ab.<br>7. 3 or 4<br>8. 5 and 6 and 7<br>9. 1 or 2 or 8<br>10. 9 and 2020:2021.(sa_year).                                                                                                        | 2020-2021          | 01.02.2021  | 170                                   |
| OVID EMBASE                      | 1. social prescri*.mp.<br>2. community referral*.mp.<br>3. social.ti,ab.<br>4. psychosocial.ti,ab.<br>5. referral.ti,ab.<br>6. primary care.ti,ab.<br>7. 3 or 4<br>8. 5 and 6 and 7<br>9. 1 or 2 or 8<br>10. 9 and 2020:2021.(sa_year).                                                                                                        | 2020-2021          | 01.02.2021  | 197                                   |
| EBSCO CINAHL                     | (TI "social prescri*" OR AB "social prescri*") OR (TI "community referral*" OR AB "community referral*") OR (((TI psychosocial OR AB psychosocial) OR (TI social OR AB social)) AND (TI referral* OR AB referral*)) AND (TI "primary care" OR AB "primary care")                                                                               | May 2020- Feb 2021 | 01.02.2021  | 72                                    |
| EBSCO SocIndex                   | (TI "social prescri*" OR AB "social prescri*") OR (TI "community referral*" OR AB "community referral*") OR (((TI psychosocial OR AB psychosocial) OR (TI social OR AB social)) AND (TI referral* OR AB referral*)) AND (TI "primary care" OR AB "primary care")                                                                               | May 2020- Feb 2021 | 01.02.2021  | 5                                     |
| Social Care Online               | social prescribing OR community referral                                                                                                                                                                                                                                                                                                       | 2020-2021          | 01.02.2021  | 40                                    |
| Cochrane:<br>- CDSR<br>- CENTRAL | 1. social NEXT prescri*:ti,ab,kw<br>2. community NEXT referral*:ti,ab,kw<br>3. "social":ti,ab,kw<br>4. "psychosocial":ti,ab,kw<br>5. "referral": ti,ab,kw<br>6. "primary care":ti,ab,kw<br>7. 3 or 4<br>8. 5 and 6 and 7<br>9. 1 or 2 or 8<br>with Cochrane Library publication date from May 2020 to Feb 2021, in Cochrane Reviews and Trials | May 2020- Feb 2021 | 01.02.2021  | 30 trials                             |
| Google Scholar                   | intitle:"social prescribing"<br><br>Limits: no patents / citations, time frame 2020-2021                                                                                                                                                                                                                                                       | 2020-2021          | 01.02.2021  | 68                                    |
