# Supplementary material for: Social Prescribing: Systematic Review of the Effectiveness of Psychosocial Community Referral Interventions in Primary Care
Source: PubMed Central journal article supplement (PMC9389950; doi:10.5334/ijic.6472), 2022-08-19
Supplement: ijic-22-3-6472-s3.pdf [file ijic-22-3-6472-s3.pdf]

**Supporting Table 2: Study characteristics**

| Project            | Methods                                                                                                                                                                                                                                                                                                                                                                                                                                                                             | Participants                                                                                                                                                                                                                                                                                                                                                                                                                                                                                                                                                                                                                                                                                                                                                                                                                                                                                                                                                                                                                                                                                                                                                                                                                                                                                                                                                                                                                                                                                                              | Setting | Interventions | Outcomes | Notes |           |            |        |          |      |           |                                                 |      |                    |   |   |                   |             |   |       |                                        |      |                                                 |      |                                                                          |                                                                                                                                                                                                                                                                                                                                                                                                                                                                                                                                                                                                                                                                                                                                                                                                                                                                                                                                                                                                                                                                                                                                                                                       |      |   |     |                                                                                                                                                                        |      |                                                                                                                                                                                                                                                                                                                                                                                                                                                                                     |              |                                                                               |     |   |       |   |                   |                  |           |                                                |                                                                                                                                                                                                                                                                                                                                                                                                                                                                                                                                                                                                                                                                                                                                                                                                                                                                                                                                                                                                                                                                                                                                                                                                                                                                                                                               |                                                                                                                                        |
|--------------------|-------------------------------------------------------------------------------------------------------------------------------------------------------------------------------------------------------------------------------------------------------------------------------------------------------------------------------------------------------------------------------------------------------------------------------------------------------------------------------------|---------------------------------------------------------------------------------------------------------------------------------------------------------------------------------------------------------------------------------------------------------------------------------------------------------------------------------------------------------------------------------------------------------------------------------------------------------------------------------------------------------------------------------------------------------------------------------------------------------------------------------------------------------------------------------------------------------------------------------------------------------------------------------------------------------------------------------------------------------------------------------------------------------------------------------------------------------------------------------------------------------------------------------------------------------------------------------------------------------------------------------------------------------------------------------------------------------------------------------------------------------------------------------------------------------------------------------------------------------------------------------------------------------------------------------------------------------------------------------------------------------------------------|---------|---------------|----------|-------|-----------|------------|--------|----------|------|-----------|-------------------------------------------------|------|--------------------|---|---|-------------------|-------------|---|-------|----------------------------------------|------|-------------------------------------------------|------|--------------------------------------------------------------------------|---------------------------------------------------------------------------------------------------------------------------------------------------------------------------------------------------------------------------------------------------------------------------------------------------------------------------------------------------------------------------------------------------------------------------------------------------------------------------------------------------------------------------------------------------------------------------------------------------------------------------------------------------------------------------------------------------------------------------------------------------------------------------------------------------------------------------------------------------------------------------------------------------------------------------------------------------------------------------------------------------------------------------------------------------------------------------------------------------------------------------------------------------------------------------------------|------|---|-----|------------------------------------------------------------------------------------------------------------------------------------------------------------------------|------|-------------------------------------------------------------------------------------------------------------------------------------------------------------------------------------------------------------------------------------------------------------------------------------------------------------------------------------------------------------------------------------------------------------------------------------------------------------------------------------|--------------|-------------------------------------------------------------------------------|-----|---|-------|---|-------------------|------------------|-----------|------------------------------------------------|-------------------------------------------------------------------------------------------------------------------------------------------------------------------------------------------------------------------------------------------------------------------------------------------------------------------------------------------------------------------------------------------------------------------------------------------------------------------------------------------------------------------------------------------------------------------------------------------------------------------------------------------------------------------------------------------------------------------------------------------------------------------------------------------------------------------------------------------------------------------------------------------------------------------------------------------------------------------------------------------------------------------------------------------------------------------------------------------------------------------------------------------------------------------------------------------------------------------------------------------------------------------------------------------------------------------------------|----------------------------------------------------------------------------------------------------------------------------------------|
| Aggar 2020 (15)    | Uncontrolled before-and-after study, mixed-methods<br><br>Study length: 21 months                                                                                                                                                                                                                                                                                                                                                                                                   | <p><b>Inclusion criteria:</b></p> <ul style="list-style-type: none"> <li>- people aged 18 to 65 years who had been unable to return to work after a work-related injury acquired between six months and three years prior, or who had returned to work on reduced hours or duties, and were living in the general community within the area of greater Sydney, Australia</li> <li>- assessment by a general practitioner as experiencing psychosocial difficulties and likely to benefit from increased social participation</li> </ul> <p><b>Exclusion criteria:</b></p> <ul style="list-style-type: none"> <li>- receiving acute inpatient treatment, having significant cognitive impairment, or participating in an alternative program for injured workers</li> </ul> <p>Baseline characteristics:</p> <table border="1"> <tr> <td>N</td> <td></td> <td>200</td> </tr> <tr> <td>Age</td> <td>Mean (SD)</td> <td>51 (10.15)</td> </tr> <tr> <td>Gender</td> <td>Female %</td> <td>43.7</td> </tr> <tr> <td>Ethnicity</td> <td>Neither Aboriginal nor Torres Strait Islander %</td> <td>95.7</td> </tr> <tr> <td>Living arrangement</td> <td>-</td> <td>-</td> </tr> <tr> <td>Employment status</td> <td>Full-time %</td> <td>4</td> </tr> <tr> <td rowspan="2">Other</td> <td>Time in workforce &gt; 10 years % (n=168)</td> <td>76.7</td> </tr> <tr> <td>Injury-related time off work &gt;2 years % (n=166)</td> <td>37.4</td> </tr> </table> <p>Population: Special (unable to work due to work-related injury)</p> | N       |               | 200      | Age   | Mean (SD) | 51 (10.15) | Gender | Female % | 43.7 | Ethnicity | Neither Aboriginal nor Torres Strait Islander % | 95.7 | Living arrangement | - | - | Employment status | Full-time % | 4 | Other | Time in workforce > 10 years % (n=168) | 76.7 | Injury-related time off work >2 years % (n=166) | 37.4 | <p>Primary care: general practice</p> <p>Country: Australia (Sydney)</p> | <table border="1"> <tr> <td>Name</td> <td>-</td> </tr> <tr> <td>Why</td> <td>Aims of promoting social and economic participation, increasing psychological wellbeing, and decreasing health service use for injured workers with psychosocial needs</td> </tr> <tr> <td>What</td> <td>It involved holistic needs assessment, customized care planning, linkage and referral to appropriate locally-based health and social services, enrolment in social and therapeutic activities, follow-up contact<br/><br/>- included art and craft, yoga and relaxation, equine therapy, social groups<br/><br/>- referrals were made to external organizations for services such as financial or relationship counselling, mental health support groups, housing, and other assistance</td> </tr> <tr> <td>Who provided</td> <td>Qualified and experienced link workers (typically a social worker or similar)</td> </tr> <tr> <td>How</td> <td>-</td> </tr> <tr> <td>Where</td> <td>-</td> </tr> <tr> <td>When and how much</td> <td>12 weeks program</td> </tr> <tr> <td>Tailoring</td> <td>Personalized through holistic needs assessment</td> </tr> </table> <p>Intervention: Holistic</p> | Name | - | Why | Aims of promoting social and economic participation, increasing psychological wellbeing, and decreasing health service use for injured workers with psychosocial needs | What | It involved holistic needs assessment, customized care planning, linkage and referral to appropriate locally-based health and social services, enrolment in social and therapeutic activities, follow-up contact<br><br>- included art and craft, yoga and relaxation, equine therapy, social groups<br><br>- referrals were made to external organizations for services such as financial or relationship counselling, mental health support groups, housing, and other assistance | Who provided | Qualified and experienced link workers (typically a social worker or similar) | How | - | Where | - | When and how much | 12 weeks program | Tailoring | Personalized through holistic needs assessment | <p>Patient outcomes collected by link workers at the program start and upon completion:</p> <ul style="list-style-type: none"> <li>- World Health Organization Quality of Life (WHO-QOL-BREF)</li> <li>- Camberwell Assessment of Need Short Appraisal Schedule (CANSAS)</li> <li>- EQ-5D-5L Health Thermometer</li> <li>- Kessler Psychological Distress Scale (K10)</li> <li>- UCLA 3-item Loneliness Scale</li> <li>- Pain intensity: Pain Scale</li> <li>- self-reported current ability to work in paid employment</li> <li>- Confidence in being able to return to work in the future</li> <li>- medically approved hours of work</li> <li>- number of people that participants could count on</li> <li>- satisfaction with social support, participants that never participated in social activities</li> </ul> <p>Health service utilization collected by link workers at the program start and upon completion:</p> <ul style="list-style-type: none"> <li>- having spent time in hospital in the previous three months and at follow-up, frequency of contact with health services</li> <li>- Participant claims data including capacity for work at three time Points (Time 1: baseline, Time 2: 12 weeks after baseline/post-intervention; Time 3: 24 weeks after baseline/12 weeks post-intervention)</li> </ul> | <p>Peer-Review: Yes</p> <p>Funding source: icare Foundation (Insurance and Care NSW)</p> <p>declaration of interest: none declared</p> |
| N                  |                                                                                                                                                                                                                                                                                                                                                                                                                                                                                     | 200                                                                                                                                                                                                                                                                                                                                                                                                                                                                                                                                                                                                                                                                                                                                                                                                                                                                                                                                                                                                                                                                                                                                                                                                                                                                                                                                                                                                                                                                                                                       |         |               |          |       |           |            |        |          |      |           |                                                 |      |                    |   |   |                   |             |   |       |                                        |      |                                                 |      |                                                                          |                                                                                                                                                                                                                                                                                                                                                                                                                                                                                                                                                                                                                                                                                                                                                                                                                                                                                                                                                                                                                                                                                                                                                                                       |      |   |     |                                                                                                                                                                        |      |                                                                                                                                                                                                                                                                                                                                                                                                                                                                                     |              |                                                                               |     |   |       |   |                   |                  |           |                                                |                                                                                                                                                                                                                                                                                                                                                                                                                                                                                                                                                                                                                                                                                                                                                                                                                                                                                                                                                                                                                                                                                                                                                                                                                                                                                                                               |                                                                                                                                        |
| Age                | Mean (SD)                                                                                                                                                                                                                                                                                                                                                                                                                                                                           | 51 (10.15)                                                                                                                                                                                                                                                                                                                                                                                                                                                                                                                                                                                                                                                                                                                                                                                                                                                                                                                                                                                                                                                                                                                                                                                                                                                                                                                                                                                                                                                                                                                |         |               |          |       |           |            |        |          |      |           |                                                 |      |                    |   |   |                   |             |   |       |                                        |      |                                                 |      |                                                                          |                                                                                                                                                                                                                                                                                                                                                                                                                                                                                                                                                                                                                                                                                                                                                                                                                                                                                                                                                                                                                                                                                                                                                                                       |      |   |     |                                                                                                                                                                        |      |                                                                                                                                                                                                                                                                                                                                                                                                                                                                                     |              |                                                                               |     |   |       |   |                   |                  |           |                                                |                                                                                                                                                                                                                                                                                                                                                                                                                                                                                                                                                                                                                                                                                                                                                                                                                                                                                                                                                                                                                                                                                                                                                                                                                                                                                                                               |                                                                                                                                        |
| Gender             | Female %                                                                                                                                                                                                                                                                                                                                                                                                                                                                            | 43.7                                                                                                                                                                                                                                                                                                                                                                                                                                                                                                                                                                                                                                                                                                                                                                                                                                                                                                                                                                                                                                                                                                                                                                                                                                                                                                                                                                                                                                                                                                                      |         |               |          |       |           |            |        |          |      |           |                                                 |      |                    |   |   |                   |             |   |       |                                        |      |                                                 |      |                                                                          |                                                                                                                                                                                                                                                                                                                                                                                                                                                                                                                                                                                                                                                                                                                                                                                                                                                                                                                                                                                                                                                                                                                                                                                       |      |   |     |                                                                                                                                                                        |      |                                                                                                                                                                                                                                                                                                                                                                                                                                                                                     |              |                                                                               |     |   |       |   |                   |                  |           |                                                |                                                                                                                                                                                                                                                                                                                                                                                                                                                                                                                                                                                                                                                                                                                                                                                                                                                                                                                                                                                                                                                                                                                                                                                                                                                                                                                               |                                                                                                                                        |
| Ethnicity          | Neither Aboriginal nor Torres Strait Islander %                                                                                                                                                                                                                                                                                                                                                                                                                                     | 95.7                                                                                                                                                                                                                                                                                                                                                                                                                                                                                                                                                                                                                                                                                                                                                                                                                                                                                                                                                                                                                                                                                                                                                                                                                                                                                                                                                                                                                                                                                                                      |         |               |          |       |           |            |        |          |      |           |                                                 |      |                    |   |   |                   |             |   |       |                                        |      |                                                 |      |                                                                          |                                                                                                                                                                                                                                                                                                                                                                                                                                                                                                                                                                                                                                                                                                                                                                                                                                                                                                                                                                                                                                                                                                                                                                                       |      |   |     |                                                                                                                                                                        |      |                                                                                                                                                                                                                                                                                                                                                                                                                                                                                     |              |                                                                               |     |   |       |   |                   |                  |           |                                                |                                                                                                                                                                                                                                                                                                                                                                                                                                                                                                                                                                                                                                                                                                                                                                                                                                                                                                                                                                                                                                                                                                                                                                                                                                                                                                                               |                                                                                                                                        |
| Living arrangement | -                                                                                                                                                                                                                                                                                                                                                                                                                                                                                   | -                                                                                                                                                                                                                                                                                                                                                                                                                                                                                                                                                                                                                                                                                                                                                                                                                                                                                                                                                                                                                                                                                                                                                                                                                                                                                                                                                                                                                                                                                                                         |         |               |          |       |           |            |        |          |      |           |                                                 |      |                    |   |   |                   |             |   |       |                                        |      |                                                 |      |                                                                          |                                                                                                                                                                                                                                                                                                                                                                                                                                                                                                                                                                                                                                                                                                                                                                                                                                                                                                                                                                                                                                                                                                                                                                                       |      |   |     |                                                                                                                                                                        |      |                                                                                                                                                                                                                                                                                                                                                                                                                                                                                     |              |                                                                               |     |   |       |   |                   |                  |           |                                                |                                                                                                                                                                                                                                                                                                                                                                                                                                                                                                                                                                                                                                                                                                                                                                                                                                                                                                                                                                                                                                                                                                                                                                                                                                                                                                                               |                                                                                                                                        |
| Employment status  | Full-time %                                                                                                                                                                                                                                                                                                                                                                                                                                                                         | 4                                                                                                                                                                                                                                                                                                                                                                                                                                                                                                                                                                                                                                                                                                                                                                                                                                                                                                                                                                                                                                                                                                                                                                                                                                                                                                                                                                                                                                                                                                                         |         |               |          |       |           |            |        |          |      |           |                                                 |      |                    |   |   |                   |             |   |       |                                        |      |                                                 |      |                                                                          |                                                                                                                                                                                                                                                                                                                                                                                                                                                                                                                                                                                                                                                                                                                                                                                                                                                                                                                                                                                                                                                                                                                                                                                       |      |   |     |                                                                                                                                                                        |      |                                                                                                                                                                                                                                                                                                                                                                                                                                                                                     |              |                                                                               |     |   |       |   |                   |                  |           |                                                |                                                                                                                                                                                                                                                                                                                                                                                                                                                                                                                                                                                                                                                                                                                                                                                                                                                                                                                                                                                                                                                                                                                                                                                                                                                                                                                               |                                                                                                                                        |
| Other              | Time in workforce > 10 years % (n=168)                                                                                                                                                                                                                                                                                                                                                                                                                                              | 76.7                                                                                                                                                                                                                                                                                                                                                                                                                                                                                                                                                                                                                                                                                                                                                                                                                                                                                                                                                                                                                                                                                                                                                                                                                                                                                                                                                                                                                                                                                                                      |         |               |          |       |           |            |        |          |      |           |                                                 |      |                    |   |   |                   |             |   |       |                                        |      |                                                 |      |                                                                          |                                                                                                                                                                                                                                                                                                                                                                                                                                                                                                                                                                                                                                                                                                                                                                                                                                                                                                                                                                                                                                                                                                                                                                                       |      |   |     |                                                                                                                                                                        |      |                                                                                                                                                                                                                                                                                                                                                                                                                                                                                     |              |                                                                               |     |   |       |   |                   |                  |           |                                                |                                                                                                                                                                                                                                                                                                                                                                                                                                                                                                                                                                                                                                                                                                                                                                                                                                                                                                                                                                                                                                                                                                                                                                                                                                                                                                                               |                                                                                                                                        |
|                    | Injury-related time off work >2 years % (n=166)                                                                                                                                                                                                                                                                                                                                                                                                                                     | 37.4                                                                                                                                                                                                                                                                                                                                                                                                                                                                                                                                                                                                                                                                                                                                                                                                                                                                                                                                                                                                                                                                                                                                                                                                                                                                                                                                                                                                                                                                                                                      |         |               |          |       |           |            |        |          |      |           |                                                 |      |                    |   |   |                   |             |   |       |                                        |      |                                                 |      |                                                                          |                                                                                                                                                                                                                                                                                                                                                                                                                                                                                                                                                                                                                                                                                                                                                                                                                                                                                                                                                                                                                                                                                                                                                                                       |      |   |     |                                                                                                                                                                        |      |                                                                                                                                                                                                                                                                                                                                                                                                                                                                                     |              |                                                                               |     |   |       |   |                   |                  |           |                                                |                                                                                                                                                                                                                                                                                                                                                                                                                                                                                                                                                                                                                                                                                                                                                                                                                                                                                                                                                                                                                                                                                                                                                                                                                                                                                                                               |                                                                                                                                        |
| Name               | -                                                                                                                                                                                                                                                                                                                                                                                                                                                                                   |                                                                                                                                                                                                                                                                                                                                                                                                                                                                                                                                                                                                                                                                                                                                                                                                                                                                                                                                                                                                                                                                                                                                                                                                                                                                                                                                                                                                                                                                                                                           |         |               |          |       |           |            |        |          |      |           |                                                 |      |                    |   |   |                   |             |   |       |                                        |      |                                                 |      |                                                                          |                                                                                                                                                                                                                                                                                                                                                                                                                                                                                                                                                                                                                                                                                                                                                                                                                                                                                                                                                                                                                                                                                                                                                                                       |      |   |     |                                                                                                                                                                        |      |                                                                                                                                                                                                                                                                                                                                                                                                                                                                                     |              |                                                                               |     |   |       |   |                   |                  |           |                                                |                                                                                                                                                                                                                                                                                                                                                                                                                                                                                                                                                                                                                                                                                                                                                                                                                                                                                                                                                                                                                                                                                                                                                                                                                                                                                                                               |                                                                                                                                        |
| Why                | Aims of promoting social and economic participation, increasing psychological wellbeing, and decreasing health service use for injured workers with psychosocial needs                                                                                                                                                                                                                                                                                                              |                                                                                                                                                                                                                                                                                                                                                                                                                                                                                                                                                                                                                                                                                                                                                                                                                                                                                                                                                                                                                                                                                                                                                                                                                                                                                                                                                                                                                                                                                                                           |         |               |          |       |           |            |        |          |      |           |                                                 |      |                    |   |   |                   |             |   |       |                                        |      |                                                 |      |                                                                          |                                                                                                                                                                                                                                                                                                                                                                                                                                                                                                                                                                                                                                                                                                                                                                                                                                                                                                                                                                                                                                                                                                                                                                                       |      |   |     |                                                                                                                                                                        |      |                                                                                                                                                                                                                                                                                                                                                                                                                                                                                     |              |                                                                               |     |   |       |   |                   |                  |           |                                                |                                                                                                                                                                                                                                                                                                                                                                                                                                                                                                                                                                                                                                                                                                                                                                                                                                                                                                                                                                                                                                                                                                                                                                                                                                                                                                                               |                                                                                                                                        |
| What               | It involved holistic needs assessment, customized care planning, linkage and referral to appropriate locally-based health and social services, enrolment in social and therapeutic activities, follow-up contact<br><br>- included art and craft, yoga and relaxation, equine therapy, social groups<br><br>- referrals were made to external organizations for services such as financial or relationship counselling, mental health support groups, housing, and other assistance |                                                                                                                                                                                                                                                                                                                                                                                                                                                                                                                                                                                                                                                                                                                                                                                                                                                                                                                                                                                                                                                                                                                                                                                                                                                                                                                                                                                                                                                                                                                           |         |               |          |       |           |            |        |          |      |           |                                                 |      |                    |   |   |                   |             |   |       |                                        |      |                                                 |      |                                                                          |                                                                                                                                                                                                                                                                                                                                                                                                                                                                                                                                                                                                                                                                                                                                                                                                                                                                                                                                                                                                                                                                                                                                                                                       |      |   |     |                                                                                                                                                                        |      |                                                                                                                                                                                                                                                                                                                                                                                                                                                                                     |              |                                                                               |     |   |       |   |                   |                  |           |                                                |                                                                                                                                                                                                                                                                                                                                                                                                                                                                                                                                                                                                                                                                                                                                                                                                                                                                                                                                                                                                                                                                                                                                                                                                                                                                                                                               |                                                                                                                                        |
| Who provided       | Qualified and experienced link workers (typically a social worker or similar)                                                                                                                                                                                                                                                                                                                                                                                                       |                                                                                                                                                                                                                                                                                                                                                                                                                                                                                                                                                                                                                                                                                                                                                                                                                                                                                                                                                                                                                                                                                                                                                                                                                                                                                                                                                                                                                                                                                                                           |         |               |          |       |           |            |        |          |      |           |                                                 |      |                    |   |   |                   |             |   |       |                                        |      |                                                 |      |                                                                          |                                                                                                                                                                                                                                                                                                                                                                                                                                                                                                                                                                                                                                                                                                                                                                                                                                                                                                                                                                                                                                                                                                                                                                                       |      |   |     |                                                                                                                                                                        |      |                                                                                                                                                                                                                                                                                                                                                                                                                                                                                     |              |                                                                               |     |   |       |   |                   |                  |           |                                                |                                                                                                                                                                                                                                                                                                                                                                                                                                                                                                                                                                                                                                                                                                                                                                                                                                                                                                                                                                                                                                                                                                                                                                                                                                                                                                                               |                                                                                                                                        |
| How                | -                                                                                                                                                                                                                                                                                                                                                                                                                                                                                   |                                                                                                                                                                                                                                                                                                                                                                                                                                                                                                                                                                                                                                                                                                                                                                                                                                                                                                                                                                                                                                                                                                                                                                                                                                                                                                                                                                                                                                                                                                                           |         |               |          |       |           |            |        |          |      |           |                                                 |      |                    |   |   |                   |             |   |       |                                        |      |                                                 |      |                                                                          |                                                                                                                                                                                                                                                                                                                                                                                                                                                                                                                                                                                                                                                                                                                                                                                                                                                                                                                                                                                                                                                                                                                                                                                       |      |   |     |                                                                                                                                                                        |      |                                                                                                                                                                                                                                                                                                                                                                                                                                                                                     |              |                                                                               |     |   |       |   |                   |                  |           |                                                |                                                                                                                                                                                                                                                                                                                                                                                                                                                                                                                                                                                                                                                                                                                                                                                                                                                                                                                                                                                                                                                                                                                                                                                                                                                                                                                               |                                                                                                                                        |
| Where              | -                                                                                                                                                                                                                                                                                                                                                                                                                                                                                   |                                                                                                                                                                                                                                                                                                                                                                                                                                                                                                                                                                                                                                                                                                                                                                                                                                                                                                                                                                                                                                                                                                                                                                                                                                                                                                                                                                                                                                                                                                                           |         |               |          |       |           |            |        |          |      |           |                                                 |      |                    |   |   |                   |             |   |       |                                        |      |                                                 |      |                                                                          |                                                                                                                                                                                                                                                                                                                                                                                                                                                                                                                                                                                                                                                                                                                                                                                                                                                                                                                                                                                                                                                                                                                                                                                       |      |   |     |                                                                                                                                                                        |      |                                                                                                                                                                                                                                                                                                                                                                                                                                                                                     |              |                                                                               |     |   |       |   |                   |                  |           |                                                |                                                                                                                                                                                                                                                                                                                                                                                                                                                                                                                                                                                                                                                                                                                                                                                                                                                                                                                                                                                                                                                                                                                                                                                                                                                                                                                               |                                                                                                                                        |
| When and how much  | 12 weeks program                                                                                                                                                                                                                                                                                                                                                                                                                                                                    |                                                                                                                                                                                                                                                                                                                                                                                                                                                                                                                                                                                                                                                                                                                                                                                                                                                                                                                                                                                                                                                                                                                                                                                                                                                                                                                                                                                                                                                                                                                           |         |               |          |       |           |            |        |          |      |           |                                                 |      |                    |   |   |                   |             |   |       |                                        |      |                                                 |      |                                                                          |                                                                                                                                                                                                                                                                                                                                                                                                                                                                                                                                                                                                                                                                                                                                                                                                                                                                                                                                                                                                                                                                                                                                                                                       |      |   |     |                                                                                                                                                                        |      |                                                                                                                                                                                                                                                                                                                                                                                                                                                                                     |              |                                                                               |     |   |       |   |                   |                  |           |                                                |                                                                                                                                                                                                                                                                                                                                                                                                                                                                                                                                                                                                                                                                                                                                                                                                                                                                                                                                                                                                                                                                                                                                                                                                                                                                                                                               |                                                                                                                                        |
| Tailoring          | Personalized through holistic needs assessment                                                                                                                                                                                                                                                                                                                                                                                                                                      |                                                                                                                                                                                                                                                                                                                                                                                                                                                                                                                                                                                                                                                                                                                                                                                                                                                                                                                                                                                                                                                                                                                                                                                                                                                                                                                                                                                                                                                                                                                           |         |               |          |       |           |            |        |          |      |           |                                                 |      |                    |   |   |                   |             |   |       |                                        |      |                                                 |      |                                                                          |                                                                                                                                                                                                                                                                                                                                                                                                                                                                                                                                                                                                                                                                                                                                                                                                                                                                                                                                                                                                                                                                                                                                                                                       |      |   |     |                                                                                                                                                                        |      |                                                                                                                                                                                                                                                                                                                                                                                                                                                                                     |              |                                                                               |     |   |       |   |                   |                  |           |                                                |                                                                                                                                                                                                                                                                                                                                                                                                                                                                                                                                                                                                                                                                                                                                                                                                                                                                                                                                                                                                                                                                                                                                                                                                                                                                                                                               |                                                                                                                                        |

|                    |                                                                                                                                        |                                                                                                                                                                                                                                                                                                                                                                                                                                                                                                                                                                                                                                                                                                                                                                                                                                                                                                                                                                                                                                                                         |   |  |    |     |           |         |        |          |    |           |   |   |                    |   |   |                   |   |   |       |   |   |                                                            |                                                                                                                                                                                                                                                                                                                                                                                                                                                                                                                                                                                                                                                                                                                                                                                                                                                                                                                                                                                                                                       |      |                            |     |                                                                                                                                        |      |                                                                                                                            |              |                                                                                                                    |     |                                                                                                                                    |       |                  |                   |                           |           |                                        |                                                                                                                                                                                                                                                                                                                                                                                                                                                                                                                                                                                                                                                                                                                                                                                                                                                                                                                                                                                                                                                       |                                                                                                                                                                                                                                                                                                                               |
|--------------------|----------------------------------------------------------------------------------------------------------------------------------------|-------------------------------------------------------------------------------------------------------------------------------------------------------------------------------------------------------------------------------------------------------------------------------------------------------------------------------------------------------------------------------------------------------------------------------------------------------------------------------------------------------------------------------------------------------------------------------------------------------------------------------------------------------------------------------------------------------------------------------------------------------------------------------------------------------------------------------------------------------------------------------------------------------------------------------------------------------------------------------------------------------------------------------------------------------------------------|---|--|----|-----|-----------|---------|--------|----------|----|-----------|---|---|--------------------|---|---|-------------------|---|---|-------|---|---|------------------------------------------------------------|---------------------------------------------------------------------------------------------------------------------------------------------------------------------------------------------------------------------------------------------------------------------------------------------------------------------------------------------------------------------------------------------------------------------------------------------------------------------------------------------------------------------------------------------------------------------------------------------------------------------------------------------------------------------------------------------------------------------------------------------------------------------------------------------------------------------------------------------------------------------------------------------------------------------------------------------------------------------------------------------------------------------------------------|------|----------------------------|-----|----------------------------------------------------------------------------------------------------------------------------------------|------|----------------------------------------------------------------------------------------------------------------------------|--------------|--------------------------------------------------------------------------------------------------------------------|-----|------------------------------------------------------------------------------------------------------------------------------------|-------|------------------|-------------------|---------------------------|-----------|----------------------------------------|-------------------------------------------------------------------------------------------------------------------------------------------------------------------------------------------------------------------------------------------------------------------------------------------------------------------------------------------------------------------------------------------------------------------------------------------------------------------------------------------------------------------------------------------------------------------------------------------------------------------------------------------------------------------------------------------------------------------------------------------------------------------------------------------------------------------------------------------------------------------------------------------------------------------------------------------------------------------------------------------------------------------------------------------------------|-------------------------------------------------------------------------------------------------------------------------------------------------------------------------------------------------------------------------------------------------------------------------------------------------------------------------------|
| Aggar 2021 (39)    | <p>Uncontrolled before-and-after study</p> <p>Study length:<br/>-</p>                                                                  | <p><b>Inclusion criteria:</b></p> <ul style="list-style-type: none"> <li>- 18–65 years</li> <li>- living in the community in the Sydney Local Health District</li> <li>- diagnosed with serious mental illness likely to last 6 months or longer (serious mental illness is one that is severe and persistent, with complex needs)</li> </ul> <p><b>Exclusion criteria:</b></p> <ul style="list-style-type: none"> <li>- receiving current acute inpatient treatment</li> <li>- significant cognitive impairment</li> </ul> <p>Baseline characteristics:</p> <table border="1" data-bbox="483 674 1071 997"> <tr> <td>N</td> <td></td> <td>24</td> </tr> <tr> <td>Age</td> <td>Mean (SD)</td> <td>45 (15)</td> </tr> <tr> <td>Gender</td> <td>Female %</td> <td>69</td> </tr> <tr> <td>Ethnicity</td> <td>-</td> <td>-</td> </tr> <tr> <td>Living arrangement</td> <td>-</td> <td>-</td> </tr> <tr> <td>Employment status</td> <td>-</td> <td>-</td> </tr> <tr> <td>Other</td> <td>-</td> <td>-</td> </tr> </table> <p>Population: Special (serious mental illness)</p> | N |  | 24 | Age | Mean (SD) | 45 (15) | Gender | Female % | 69 | Ethnicity | - | - | Living arrangement | - | - | Employment status | - | - | Other | - | - | <p>Primary care</p> <p>Country:<br/>Australia (Sydney)</p> | <table border="1" data-bbox="1314 212 2228 707"> <tr> <td>Name</td> <td>Social prescribing program</td> </tr> <tr> <td>Why</td> <td>Increase the services provided in the community, improving QoL and Well-being, health self-efficacy, and social economic participation</td> </tr> <tr> <td>What</td> <td>Arts and crafts group, additional supports and adjustments pre- and post-activities (e.g. arrangements for transportation)</td> </tr> <tr> <td>Who provided</td> <td>Link worker, groups were led by a practicing artist/instructor and co-facilitated by a mental health social worker</td> </tr> <tr> <td>How</td> <td>Participants self-presented to their GP and where referred to Plus Social program: assessment, information, referral to activities</td> </tr> <tr> <td>Where</td> <td>Assessed at home</td> </tr> <tr> <td>When and how much</td> <td>Weekly 2-3 h for 10 weeks</td> </tr> <tr> <td>Tailoring</td> <td>- personalized referrals to activities</td> </tr> </table> <p>Intervention: Holistic</p> | Name | Social prescribing program | Why | Increase the services provided in the community, improving QoL and Well-being, health self-efficacy, and social economic participation | What | Arts and crafts group, additional supports and adjustments pre- and post-activities (e.g. arrangements for transportation) | Who provided | Link worker, groups were led by a practicing artist/instructor and co-facilitated by a mental health social worker | How | Participants self-presented to their GP and where referred to Plus Social program: assessment, information, referral to activities | Where | Assessed at home | When and how much | Weekly 2-3 h for 10 weeks | Tailoring | - personalized referrals to activities | <p>Patient outcomes at baseline (pre-intervention) and 12- or 24-weeks follow-up, assessment at home via social worker:</p> <ul style="list-style-type: none"> <li>- Quality of Live: World Health Organisation Quality of Live tool (WHO-QOL-BREF)</li> <li>- Welfare Needs and Support: Camberwell Assessment of Need Short Appraisal Schedule (CANSAS)</li> <li>- Health Status and Health Self- efficacy: EuroQol Health Thermometer (EQ5D)</li> <li>- Psychosocial Distress: Kessler Psychological Distress Scale (K10)</li> <li>- Loneliness and Social Participation: UCLA 3-item Loneliness Scale</li> <li>- economic participation (one item measured participation in paid employment (yes/no) in the previous 2 weeks)</li> </ul> <p>Process of care measures at baseline (pre-intervention) and 12- or 24-weeks follow-up, assessment at home via social worker:</p> <ul style="list-style-type: none"> <li>- Hospital admissions* (One item measured number of hospital admissions (for any reason) in the previous 6 months)</li> </ul> | <p>Peer-Review:<br/>Yes</p> <p>Funding source:<br/>Primary and Community Care Services, NSW, Australia</p> <p>Declaration of interest:<br/>Author CA has received research grants from Primary and Community Care Services, NSW, Australia. Author JBa is the CEO of Primary and Community Care Services, NSW, Australia.</p> |
| N                  |                                                                                                                                        | 24                                                                                                                                                                                                                                                                                                                                                                                                                                                                                                                                                                                                                                                                                                                                                                                                                                                                                                                                                                                                                                                                      |   |  |    |     |           |         |        |          |    |           |   |   |                    |   |   |                   |   |   |       |   |   |                                                            |                                                                                                                                                                                                                                                                                                                                                                                                                                                                                                                                                                                                                                                                                                                                                                                                                                                                                                                                                                                                                                       |      |                            |     |                                                                                                                                        |      |                                                                                                                            |              |                                                                                                                    |     |                                                                                                                                    |       |                  |                   |                           |           |                                        |                                                                                                                                                                                                                                                                                                                                                                                                                                                                                                                                                                                                                                                                                                                                                                                                                                                                                                                                                                                                                                                       |                                                                                                                                                                                                                                                                                                                               |
| Age                | Mean (SD)                                                                                                                              | 45 (15)                                                                                                                                                                                                                                                                                                                                                                                                                                                                                                                                                                                                                                                                                                                                                                                                                                                                                                                                                                                                                                                                 |   |  |    |     |           |         |        |          |    |           |   |   |                    |   |   |                   |   |   |       |   |   |                                                            |                                                                                                                                                                                                                                                                                                                                                                                                                                                                                                                                                                                                                                                                                                                                                                                                                                                                                                                                                                                                                                       |      |                            |     |                                                                                                                                        |      |                                                                                                                            |              |                                                                                                                    |     |                                                                                                                                    |       |                  |                   |                           |           |                                        |                                                                                                                                                                                                                                                                                                                                                                                                                                                                                                                                                                                                                                                                                                                                                                                                                                                                                                                                                                                                                                                       |                                                                                                                                                                                                                                                                                                                               |
| Gender             | Female %                                                                                                                               | 69                                                                                                                                                                                                                                                                                                                                                                                                                                                                                                                                                                                                                                                                                                                                                                                                                                                                                                                                                                                                                                                                      |   |  |    |     |           |         |        |          |    |           |   |   |                    |   |   |                   |   |   |       |   |   |                                                            |                                                                                                                                                                                                                                                                                                                                                                                                                                                                                                                                                                                                                                                                                                                                                                                                                                                                                                                                                                                                                                       |      |                            |     |                                                                                                                                        |      |                                                                                                                            |              |                                                                                                                    |     |                                                                                                                                    |       |                  |                   |                           |           |                                        |                                                                                                                                                                                                                                                                                                                                                                                                                                                                                                                                                                                                                                                                                                                                                                                                                                                                                                                                                                                                                                                       |                                                                                                                                                                                                                                                                                                                               |
| Ethnicity          | -                                                                                                                                      | -                                                                                                                                                                                                                                                                                                                                                                                                                                                                                                                                                                                                                                                                                                                                                                                                                                                                                                                                                                                                                                                                       |   |  |    |     |           |         |        |          |    |           |   |   |                    |   |   |                   |   |   |       |   |   |                                                            |                                                                                                                                                                                                                                                                                                                                                                                                                                                                                                                                                                                                                                                                                                                                                                                                                                                                                                                                                                                                                                       |      |                            |     |                                                                                                                                        |      |                                                                                                                            |              |                                                                                                                    |     |                                                                                                                                    |       |                  |                   |                           |           |                                        |                                                                                                                                                                                                                                                                                                                                                                                                                                                                                                                                                                                                                                                                                                                                                                                                                                                                                                                                                                                                                                                       |                                                                                                                                                                                                                                                                                                                               |
| Living arrangement | -                                                                                                                                      | -                                                                                                                                                                                                                                                                                                                                                                                                                                                                                                                                                                                                                                                                                                                                                                                                                                                                                                                                                                                                                                                                       |   |  |    |     |           |         |        |          |    |           |   |   |                    |   |   |                   |   |   |       |   |   |                                                            |                                                                                                                                                                                                                                                                                                                                                                                                                                                                                                                                                                                                                                                                                                                                                                                                                                                                                                                                                                                                                                       |      |                            |     |                                                                                                                                        |      |                                                                                                                            |              |                                                                                                                    |     |                                                                                                                                    |       |                  |                   |                           |           |                                        |                                                                                                                                                                                                                                                                                                                                                                                                                                                                                                                                                                                                                                                                                                                                                                                                                                                                                                                                                                                                                                                       |                                                                                                                                                                                                                                                                                                                               |
| Employment status  | -                                                                                                                                      | -                                                                                                                                                                                                                                                                                                                                                                                                                                                                                                                                                                                                                                                                                                                                                                                                                                                                                                                                                                                                                                                                       |   |  |    |     |           |         |        |          |    |           |   |   |                    |   |   |                   |   |   |       |   |   |                                                            |                                                                                                                                                                                                                                                                                                                                                                                                                                                                                                                                                                                                                                                                                                                                                                                                                                                                                                                                                                                                                                       |      |                            |     |                                                                                                                                        |      |                                                                                                                            |              |                                                                                                                    |     |                                                                                                                                    |       |                  |                   |                           |           |                                        |                                                                                                                                                                                                                                                                                                                                                                                                                                                                                                                                                                                                                                                                                                                                                                                                                                                                                                                                                                                                                                                       |                                                                                                                                                                                                                                                                                                                               |
| Other              | -                                                                                                                                      | -                                                                                                                                                                                                                                                                                                                                                                                                                                                                                                                                                                                                                                                                                                                                                                                                                                                                                                                                                                                                                                                                       |   |  |    |     |           |         |        |          |    |           |   |   |                    |   |   |                   |   |   |       |   |   |                                                            |                                                                                                                                                                                                                                                                                                                                                                                                                                                                                                                                                                                                                                                                                                                                                                                                                                                                                                                                                                                                                                       |      |                            |     |                                                                                                                                        |      |                                                                                                                            |              |                                                                                                                    |     |                                                                                                                                    |       |                  |                   |                           |           |                                        |                                                                                                                                                                                                                                                                                                                                                                                                                                                                                                                                                                                                                                                                                                                                                                                                                                                                                                                                                                                                                                                       |                                                                                                                                                                                                                                                                                                                               |
| Name               | Social prescribing program                                                                                                             |                                                                                                                                                                                                                                                                                                                                                                                                                                                                                                                                                                                                                                                                                                                                                                                                                                                                                                                                                                                                                                                                         |   |  |    |     |           |         |        |          |    |           |   |   |                    |   |   |                   |   |   |       |   |   |                                                            |                                                                                                                                                                                                                                                                                                                                                                                                                                                                                                                                                                                                                                                                                                                                                                                                                                                                                                                                                                                                                                       |      |                            |     |                                                                                                                                        |      |                                                                                                                            |              |                                                                                                                    |     |                                                                                                                                    |       |                  |                   |                           |           |                                        |                                                                                                                                                                                                                                                                                                                                                                                                                                                                                                                                                                                                                                                                                                                                                                                                                                                                                                                                                                                                                                                       |                                                                                                                                                                                                                                                                                                                               |
| Why                | Increase the services provided in the community, improving QoL and Well-being, health self-efficacy, and social economic participation |                                                                                                                                                                                                                                                                                                                                                                                                                                                                                                                                                                                                                                                                                                                                                                                                                                                                                                                                                                                                                                                                         |   |  |    |     |           |         |        |          |    |           |   |   |                    |   |   |                   |   |   |       |   |   |                                                            |                                                                                                                                                                                                                                                                                                                                                                                                                                                                                                                                                                                                                                                                                                                                                                                                                                                                                                                                                                                                                                       |      |                            |     |                                                                                                                                        |      |                                                                                                                            |              |                                                                                                                    |     |                                                                                                                                    |       |                  |                   |                           |           |                                        |                                                                                                                                                                                                                                                                                                                                                                                                                                                                                                                                                                                                                                                                                                                                                                                                                                                                                                                                                                                                                                                       |                                                                                                                                                                                                                                                                                                                               |
| What               | Arts and crafts group, additional supports and adjustments pre- and post-activities (e.g. arrangements for transportation)             |                                                                                                                                                                                                                                                                                                                                                                                                                                                                                                                                                                                                                                                                                                                                                                                                                                                                                                                                                                                                                                                                         |   |  |    |     |           |         |        |          |    |           |   |   |                    |   |   |                   |   |   |       |   |   |                                                            |                                                                                                                                                                                                                                                                                                                                                                                                                                                                                                                                                                                                                                                                                                                                                                                                                                                                                                                                                                                                                                       |      |                            |     |                                                                                                                                        |      |                                                                                                                            |              |                                                                                                                    |     |                                                                                                                                    |       |                  |                   |                           |           |                                        |                                                                                                                                                                                                                                                                                                                                                                                                                                                                                                                                                                                                                                                                                                                                                                                                                                                                                                                                                                                                                                                       |                                                                                                                                                                                                                                                                                                                               |
| Who provided       | Link worker, groups were led by a practicing artist/instructor and co-facilitated by a mental health social worker                     |                                                                                                                                                                                                                                                                                                                                                                                                                                                                                                                                                                                                                                                                                                                                                                                                                                                                                                                                                                                                                                                                         |   |  |    |     |           |         |        |          |    |           |   |   |                    |   |   |                   |   |   |       |   |   |                                                            |                                                                                                                                                                                                                                                                                                                                                                                                                                                                                                                                                                                                                                                                                                                                                                                                                                                                                                                                                                                                                                       |      |                            |     |                                                                                                                                        |      |                                                                                                                            |              |                                                                                                                    |     |                                                                                                                                    |       |                  |                   |                           |           |                                        |                                                                                                                                                                                                                                                                                                                                                                                                                                                                                                                                                                                                                                                                                                                                                                                                                                                                                                                                                                                                                                                       |                                                                                                                                                                                                                                                                                                                               |
| How                | Participants self-presented to their GP and where referred to Plus Social program: assessment, information, referral to activities     |                                                                                                                                                                                                                                                                                                                                                                                                                                                                                                                                                                                                                                                                                                                                                                                                                                                                                                                                                                                                                                                                         |   |  |    |     |           |         |        |          |    |           |   |   |                    |   |   |                   |   |   |       |   |   |                                                            |                                                                                                                                                                                                                                                                                                                                                                                                                                                                                                                                                                                                                                                                                                                                                                                                                                                                                                                                                                                                                                       |      |                            |     |                                                                                                                                        |      |                                                                                                                            |              |                                                                                                                    |     |                                                                                                                                    |       |                  |                   |                           |           |                                        |                                                                                                                                                                                                                                                                                                                                                                                                                                                                                                                                                                                                                                                                                                                                                                                                                                                                                                                                                                                                                                                       |                                                                                                                                                                                                                                                                                                                               |
| Where              | Assessed at home                                                                                                                       |                                                                                                                                                                                                                                                                                                                                                                                                                                                                                                                                                                                                                                                                                                                                                                                                                                                                                                                                                                                                                                                                         |   |  |    |     |           |         |        |          |    |           |   |   |                    |   |   |                   |   |   |       |   |   |                                                            |                                                                                                                                                                                                                                                                                                                                                                                                                                                                                                                                                                                                                                                                                                                                                                                                                                                                                                                                                                                                                                       |      |                            |     |                                                                                                                                        |      |                                                                                                                            |              |                                                                                                                    |     |                                                                                                                                    |       |                  |                   |                           |           |                                        |                                                                                                                                                                                                                                                                                                                                                                                                                                                                                                                                                                                                                                                                                                                                                                                                                                                                                                                                                                                                                                                       |                                                                                                                                                                                                                                                                                                                               |
| When and how much  | Weekly 2-3 h for 10 weeks                                                                                                              |                                                                                                                                                                                                                                                                                                                                                                                                                                                                                                                                                                                                                                                                                                                                                                                                                                                                                                                                                                                                                                                                         |   |  |    |     |           |         |        |          |    |           |   |   |                    |   |   |                   |   |   |       |   |   |                                                            |                                                                                                                                                                                                                                                                                                                                                                                                                                                                                                                                                                                                                                                                                                                                                                                                                                                                                                                                                                                                                                       |      |                            |     |                                                                                                                                        |      |                                                                                                                            |              |                                                                                                                    |     |                                                                                                                                    |       |                  |                   |                           |           |                                        |                                                                                                                                                                                                                                                                                                                                                                                                                                                                                                                                                                                                                                                                                                                                                                                                                                                                                                                                                                                                                                                       |                                                                                                                                                                                                                                                                                                                               |
| Tailoring          | - personalized referrals to activities                                                                                                 |                                                                                                                                                                                                                                                                                                                                                                                                                                                                                                                                                                                                                                                                                                                                                                                                                                                                                                                                                                                                                                                                         |   |  |    |     |           |         |        |          |    |           |   |   |                    |   |   |                   |   |   |       |   |   |                                                            |                                                                                                                                                                                                                                                                                                                                                                                                                                                                                                                                                                                                                                                                                                                                                                                                                                                                                                                                                                                                                                       |      |                            |     |                                                                                                                                        |      |                                                                                                                            |              |                                                                                                                    |     |                                                                                                                                    |       |                  |                   |                           |           |                                        |                                                                                                                                                                                                                                                                                                                                                                                                                                                                                                                                                                                                                                                                                                                                                                                                                                                                                                                                                                                                                                                       |                                                                                                                                                                                                                                                                                                                               |

|                            |                                                                                                                                                                                                                                                                                                                                                                                                                                                                                                                                                                                                                                                                                                                                                                                                                                               |                                                                                                                                                                                                                                                                                                                                                                                                                                                                                                                                                                                                                                                                                                                                                                                                                                                                                                                                                                                                                                                                                                                     |   |  |      |     |                    |       |        |          |      |                                                                                           |                                                                                                                                                                                                                                                                                                                                                                                                                                                                                                                                                                                                                                                                                                                                                                                                                                                                                                                                                                                                                                                                                                                                                                                                        |      |                                              |     |                                                                                                                                                                                 |                   |                                                                                                                                                                                                                                                                                                                                    |              |                                                                                                                                        |                                                 |                                         |                                                                              |                                                                                                                                                                                                                                                                                                                                                                                                                                                                                                                                                                                                                                                                                                                                                                                                                                                                                                                                                                                                                                                                                                                                                                                                                                                                                                                                                                                                                                                                                                                                                                                                                                                                                                                                                                                                                                                                                                                                                                                                                                                                       |                   |                                                                     |           |                                                                                                                                                                                                                                  |                                                                                                                                                                                                   |                                                                                                                                                                                                                                                                                                         |              |                                                                                                                                                      |     |                                                                                                                                                                                                                                                                                                                                                                                                                                                                                                                                                                                                                                                                                                                                                                                                                                               |       |             |                   |                                                                   |           |              |                                                                                                                                                                                                                                                                                                                                                                                                                                                                                                                                                                                                                                                                                                                                                                                                                                                                                                                                                                                                                                                                                                           |                                                                                                                            |
|----------------------------|-----------------------------------------------------------------------------------------------------------------------------------------------------------------------------------------------------------------------------------------------------------------------------------------------------------------------------------------------------------------------------------------------------------------------------------------------------------------------------------------------------------------------------------------------------------------------------------------------------------------------------------------------------------------------------------------------------------------------------------------------------------------------------------------------------------------------------------------------|---------------------------------------------------------------------------------------------------------------------------------------------------------------------------------------------------------------------------------------------------------------------------------------------------------------------------------------------------------------------------------------------------------------------------------------------------------------------------------------------------------------------------------------------------------------------------------------------------------------------------------------------------------------------------------------------------------------------------------------------------------------------------------------------------------------------------------------------------------------------------------------------------------------------------------------------------------------------------------------------------------------------------------------------------------------------------------------------------------------------|---|--|------|-----|--------------------|-------|--------|----------|------|-------------------------------------------------------------------------------------------|--------------------------------------------------------------------------------------------------------------------------------------------------------------------------------------------------------------------------------------------------------------------------------------------------------------------------------------------------------------------------------------------------------------------------------------------------------------------------------------------------------------------------------------------------------------------------------------------------------------------------------------------------------------------------------------------------------------------------------------------------------------------------------------------------------------------------------------------------------------------------------------------------------------------------------------------------------------------------------------------------------------------------------------------------------------------------------------------------------------------------------------------------------------------------------------------------------|------|----------------------------------------------|-----|---------------------------------------------------------------------------------------------------------------------------------------------------------------------------------|-------------------|------------------------------------------------------------------------------------------------------------------------------------------------------------------------------------------------------------------------------------------------------------------------------------------------------------------------------------|--------------|----------------------------------------------------------------------------------------------------------------------------------------|-------------------------------------------------|-----------------------------------------|------------------------------------------------------------------------------|-----------------------------------------------------------------------------------------------------------------------------------------------------------------------------------------------------------------------------------------------------------------------------------------------------------------------------------------------------------------------------------------------------------------------------------------------------------------------------------------------------------------------------------------------------------------------------------------------------------------------------------------------------------------------------------------------------------------------------------------------------------------------------------------------------------------------------------------------------------------------------------------------------------------------------------------------------------------------------------------------------------------------------------------------------------------------------------------------------------------------------------------------------------------------------------------------------------------------------------------------------------------------------------------------------------------------------------------------------------------------------------------------------------------------------------------------------------------------------------------------------------------------------------------------------------------------------------------------------------------------------------------------------------------------------------------------------------------------------------------------------------------------------------------------------------------------------------------------------------------------------------------------------------------------------------------------------------------------------------------------------------------------------------------------------------------------|-------------------|---------------------------------------------------------------------|-----------|----------------------------------------------------------------------------------------------------------------------------------------------------------------------------------------------------------------------------------|---------------------------------------------------------------------------------------------------------------------------------------------------------------------------------------------------|---------------------------------------------------------------------------------------------------------------------------------------------------------------------------------------------------------------------------------------------------------------------------------------------------------|--------------|------------------------------------------------------------------------------------------------------------------------------------------------------|-----|-----------------------------------------------------------------------------------------------------------------------------------------------------------------------------------------------------------------------------------------------------------------------------------------------------------------------------------------------------------------------------------------------------------------------------------------------------------------------------------------------------------------------------------------------------------------------------------------------------------------------------------------------------------------------------------------------------------------------------------------------------------------------------------------------------------------------------------------------|-------|-------------|-------------------|-------------------------------------------------------------------|-----------|--------------|-----------------------------------------------------------------------------------------------------------------------------------------------------------------------------------------------------------------------------------------------------------------------------------------------------------------------------------------------------------------------------------------------------------------------------------------------------------------------------------------------------------------------------------------------------------------------------------------------------------------------------------------------------------------------------------------------------------------------------------------------------------------------------------------------------------------------------------------------------------------------------------------------------------------------------------------------------------------------------------------------------------------------------------------------------------------------------------------------------------|----------------------------------------------------------------------------------------------------------------------------|
| <p>Apteligen 2015 (40)</p> | <p>Uncontrolled before-and-after study, mixed-methods</p> <p>Study length: 21 months</p>                                                                                                                                                                                                                                                                                                                                                                                                                                                                                                                                                                                                                                                                                                                                                      | <p><b>Inclusion criteria:</b></p> <ul style="list-style-type: none"> <li>- those who are not in receipt of care, but at risk of needing it</li> <li>- those who are in receipt of Council low level support</li> <li>- people who are socially isolated and who are on the cusp of needing more health and social care interventions</li> </ul> <p><b>Exclusion criteria:</b></p> <ul style="list-style-type: none"> <li>- meet substantial need threshold and are in receipt of more formal adult social care</li> </ul> <p>Baseline characteristics:</p> <table border="1" data-bbox="477 590 1003 961"> <tr> <td>N</td> <td></td> <td>2522</td> </tr> <tr> <td>Age</td> <td>75 years or over %</td> <td>62</td> </tr> <tr> <td>Gender</td> <td>Female %</td> <td>61</td> </tr> <tr> <td>Ethnicity</td> <td>White british n</td> <td>2016</td> </tr> <tr> <td>Living arrangement</td> <td>-</td> <td>-</td> </tr> <tr> <td>Employment status</td> <td>-</td> <td>-</td> </tr> <tr> <td>other</td> <td>Area where help is needed: "social isolation" n</td> <td>630</td> </tr> </table> <p>Population: General</p> | N |  | 2522 | Age | 75 years or over % | 62    | Gender | Female % | 61   | Ethnicity                                                                                 | White british n                                                                                                                                                                                                                                                                                                                                                                                                                                                                                                                                                                                                                                                                                                                                                                                                                                                                                                                                                                                                                                                                                                                                                                                        | 2016 | Living arrangement                           | -   | -                                                                                                                                                                               | Employment status | -                                                                                                                                                                                                                                                                                                                                  | -            | other                                                                                                                                  | Area where help is needed: "social isolation" n | 630                                     | <p>Primary care</p> <p>Country: UK (Buckinghamshire, South East England)</p> | <table border="1" data-bbox="1308 212 2240 1205"> <tr> <td>Name</td> <td>Prevention Matters</td> </tr> <tr> <td>Why</td> <td>Facilitate access to frontline community services and groups in Buckinghamshire, activating resources, also referred to as 'social assets', which are intended to contribute positively to reducing demand for adult social care</td> </tr> <tr> <td>What</td> <td>Volunteer Hub: recruits volunteers and allocates them to volunteer hosting organisations<br/><br/>Time Credits, which is an approach to getting people involved in community activities in exchange for non-cash rewards worth the equivalent to the time they spend contributing to community activities</td> </tr> <tr> <td>Who provided</td> <td>14 Community Practice Workers (CPWs) are aligned to the seven GP localities in Buckinghamshire, CPWs are supported by seven Community Links Officers</td> </tr> <tr> <td>How</td> <td>Step 1: Identification of prevention need, Step 2: referral, Step 3: assessment, Step 4: participation in community services and groups, Step 5: review; builds on a referral system, helps users access frontline community services and groups, including making sure that they are comfortable with their choice<br/><br/>- the needs of the program users are not met by the program itself, but by the frontline community services and groups to which users are referred through the program<br/><br/>- after assessment, the CPW agrees an action plan with the user<br/><br/>- all action plans involve a further referral to a frontline community service or group (e.g. to participate in a lunch club once a month)<br/><br/>- users engage with the CPWs again at the six- and 12-month reviews, after which the user exits the program</td> </tr> <tr> <td>Where</td> <td>Home visits</td> </tr> <tr> <td>When and how much</td> <td>initial assessment and again after six and 12 months for a review</td> </tr> <tr> <td>Tailoring</td> <td>Personalized</td> </tr> </table> <p>Intervention: Holistic</p> | Name              | Prevention Matters                                                  | Why       | Facilitate access to frontline community services and groups in Buckinghamshire, activating resources, also referred to as 'social assets', which are intended to contribute positively to reducing demand for adult social care | What                                                                                                                                                                                              | Volunteer Hub: recruits volunteers and allocates them to volunteer hosting organisations<br><br>Time Credits, which is an approach to getting people involved in community activities in exchange for non-cash rewards worth the equivalent to the time they spend contributing to community activities | Who provided | 14 Community Practice Workers (CPWs) are aligned to the seven GP localities in Buckinghamshire, CPWs are supported by seven Community Links Officers | How | Step 1: Identification of prevention need, Step 2: referral, Step 3: assessment, Step 4: participation in community services and groups, Step 5: review; builds on a referral system, helps users access frontline community services and groups, including making sure that they are comfortable with their choice<br><br>- the needs of the program users are not met by the program itself, but by the frontline community services and groups to which users are referred through the program<br><br>- after assessment, the CPW agrees an action plan with the user<br><br>- all action plans involve a further referral to a frontline community service or group (e.g. to participate in a lunch club once a month)<br><br>- users engage with the CPWs again at the six- and 12-month reviews, after which the user exits the program | Where | Home visits | When and how much | initial assessment and again after six and 12 months for a review | Tailoring | Personalized | <p>Patient outcomes at baseline and minimum 6 months follow-up:</p> <ul style="list-style-type: none"> <li>- Euroquol Group 5 Dimension questionnaire (EQ-5D) Warwick Edinburgh Mental Wellbeing Scale (WEMWBS)</li> <li>- Scores in relation to whether program users have enough social contact or feel socially isolated</li> <li>- -frequency of contact</li> <li>- Scores in relation to whether program users do things they enjoy or value with their time</li> <li>- number of days within the last week in which they had walked for at least 10 minutes</li> <li>- -the amount of time they had spent walking on one of those days (hours and minutes)</li> <li>- general perception of their overall quality of life as a whole (likert scale 1-5)</li> </ul> <p>Process of care measures at baseline and minimum 6 months follow-up:</p> <ul style="list-style-type: none"> <li>- -GP visits (monthly for those who visited a GP)</li> <li>- A&amp;E attendance</li> <li>- hospital admissions</li> <li>- Potential cost-benefits*</li> <li>- Unit cost*</li> <li>- Cost-benefits*</li> </ul> | <p>Peer-Review: no</p> <p>Funding source: Buckinghamshire County Council</p> <p>Declaration of interest: Not mentioned</p> |
| N                          |                                                                                                                                                                                                                                                                                                                                                                                                                                                                                                                                                                                                                                                                                                                                                                                                                                               | 2522                                                                                                                                                                                                                                                                                                                                                                                                                                                                                                                                                                                                                                                                                                                                                                                                                                                                                                                                                                                                                                                                                                                |   |  |      |     |                    |       |        |          |      |                                                                                           |                                                                                                                                                                                                                                                                                                                                                                                                                                                                                                                                                                                                                                                                                                                                                                                                                                                                                                                                                                                                                                                                                                                                                                                                        |      |                                              |     |                                                                                                                                                                                 |                   |                                                                                                                                                                                                                                                                                                                                    |              |                                                                                                                                        |                                                 |                                         |                                                                              |                                                                                                                                                                                                                                                                                                                                                                                                                                                                                                                                                                                                                                                                                                                                                                                                                                                                                                                                                                                                                                                                                                                                                                                                                                                                                                                                                                                                                                                                                                                                                                                                                                                                                                                                                                                                                                                                                                                                                                                                                                                                       |                   |                                                                     |           |                                                                                                                                                                                                                                  |                                                                                                                                                                                                   |                                                                                                                                                                                                                                                                                                         |              |                                                                                                                                                      |     |                                                                                                                                                                                                                                                                                                                                                                                                                                                                                                                                                                                                                                                                                                                                                                                                                                               |       |             |                   |                                                                   |           |              |                                                                                                                                                                                                                                                                                                                                                                                                                                                                                                                                                                                                                                                                                                                                                                                                                                                                                                                                                                                                                                                                                                           |                                                                                                                            |
| Age                        | 75 years or over %                                                                                                                                                                                                                                                                                                                                                                                                                                                                                                                                                                                                                                                                                                                                                                                                                            | 62                                                                                                                                                                                                                                                                                                                                                                                                                                                                                                                                                                                                                                                                                                                                                                                                                                                                                                                                                                                                                                                                                                                  |   |  |      |     |                    |       |        |          |      |                                                                                           |                                                                                                                                                                                                                                                                                                                                                                                                                                                                                                                                                                                                                                                                                                                                                                                                                                                                                                                                                                                                                                                                                                                                                                                                        |      |                                              |     |                                                                                                                                                                                 |                   |                                                                                                                                                                                                                                                                                                                                    |              |                                                                                                                                        |                                                 |                                         |                                                                              |                                                                                                                                                                                                                                                                                                                                                                                                                                                                                                                                                                                                                                                                                                                                                                                                                                                                                                                                                                                                                                                                                                                                                                                                                                                                                                                                                                                                                                                                                                                                                                                                                                                                                                                                                                                                                                                                                                                                                                                                                                                                       |                   |                                                                     |           |                                                                                                                                                                                                                                  |                                                                                                                                                                                                   |                                                                                                                                                                                                                                                                                                         |              |                                                                                                                                                      |     |                                                                                                                                                                                                                                                                                                                                                                                                                                                                                                                                                                                                                                                                                                                                                                                                                                               |       |             |                   |                                                                   |           |              |                                                                                                                                                                                                                                                                                                                                                                                                                                                                                                                                                                                                                                                                                                                                                                                                                                                                                                                                                                                                                                                                                                           |                                                                                                                            |
| Gender                     | Female %                                                                                                                                                                                                                                                                                                                                                                                                                                                                                                                                                                                                                                                                                                                                                                                                                                      | 61                                                                                                                                                                                                                                                                                                                                                                                                                                                                                                                                                                                                                                                                                                                                                                                                                                                                                                                                                                                                                                                                                                                  |   |  |      |     |                    |       |        |          |      |                                                                                           |                                                                                                                                                                                                                                                                                                                                                                                                                                                                                                                                                                                                                                                                                                                                                                                                                                                                                                                                                                                                                                                                                                                                                                                                        |      |                                              |     |                                                                                                                                                                                 |                   |                                                                                                                                                                                                                                                                                                                                    |              |                                                                                                                                        |                                                 |                                         |                                                                              |                                                                                                                                                                                                                                                                                                                                                                                                                                                                                                                                                                                                                                                                                                                                                                                                                                                                                                                                                                                                                                                                                                                                                                                                                                                                                                                                                                                                                                                                                                                                                                                                                                                                                                                                                                                                                                                                                                                                                                                                                                                                       |                   |                                                                     |           |                                                                                                                                                                                                                                  |                                                                                                                                                                                                   |                                                                                                                                                                                                                                                                                                         |              |                                                                                                                                                      |     |                                                                                                                                                                                                                                                                                                                                                                                                                                                                                                                                                                                                                                                                                                                                                                                                                                               |       |             |                   |                                                                   |           |              |                                                                                                                                                                                                                                                                                                                                                                                                                                                                                                                                                                                                                                                                                                                                                                                                                                                                                                                                                                                                                                                                                                           |                                                                                                                            |
| Ethnicity                  | White british n                                                                                                                                                                                                                                                                                                                                                                                                                                                                                                                                                                                                                                                                                                                                                                                                                               | 2016                                                                                                                                                                                                                                                                                                                                                                                                                                                                                                                                                                                                                                                                                                                                                                                                                                                                                                                                                                                                                                                                                                                |   |  |      |     |                    |       |        |          |      |                                                                                           |                                                                                                                                                                                                                                                                                                                                                                                                                                                                                                                                                                                                                                                                                                                                                                                                                                                                                                                                                                                                                                                                                                                                                                                                        |      |                                              |     |                                                                                                                                                                                 |                   |                                                                                                                                                                                                                                                                                                                                    |              |                                                                                                                                        |                                                 |                                         |                                                                              |                                                                                                                                                                                                                                                                                                                                                                                                                                                                                                                                                                                                                                                                                                                                                                                                                                                                                                                                                                                                                                                                                                                                                                                                                                                                                                                                                                                                                                                                                                                                                                                                                                                                                                                                                                                                                                                                                                                                                                                                                                                                       |                   |                                                                     |           |                                                                                                                                                                                                                                  |                                                                                                                                                                                                   |                                                                                                                                                                                                                                                                                                         |              |                                                                                                                                                      |     |                                                                                                                                                                                                                                                                                                                                                                                                                                                                                                                                                                                                                                                                                                                                                                                                                                               |       |             |                   |                                                                   |           |              |                                                                                                                                                                                                                                                                                                                                                                                                                                                                                                                                                                                                                                                                                                                                                                                                                                                                                                                                                                                                                                                                                                           |                                                                                                                            |
| Living arrangement         | -                                                                                                                                                                                                                                                                                                                                                                                                                                                                                                                                                                                                                                                                                                                                                                                                                                             | -                                                                                                                                                                                                                                                                                                                                                                                                                                                                                                                                                                                                                                                                                                                                                                                                                                                                                                                                                                                                                                                                                                                   |   |  |      |     |                    |       |        |          |      |                                                                                           |                                                                                                                                                                                                                                                                                                                                                                                                                                                                                                                                                                                                                                                                                                                                                                                                                                                                                                                                                                                                                                                                                                                                                                                                        |      |                                              |     |                                                                                                                                                                                 |                   |                                                                                                                                                                                                                                                                                                                                    |              |                                                                                                                                        |                                                 |                                         |                                                                              |                                                                                                                                                                                                                                                                                                                                                                                                                                                                                                                                                                                                                                                                                                                                                                                                                                                                                                                                                                                                                                                                                                                                                                                                                                                                                                                                                                                                                                                                                                                                                                                                                                                                                                                                                                                                                                                                                                                                                                                                                                                                       |                   |                                                                     |           |                                                                                                                                                                                                                                  |                                                                                                                                                                                                   |                                                                                                                                                                                                                                                                                                         |              |                                                                                                                                                      |     |                                                                                                                                                                                                                                                                                                                                                                                                                                                                                                                                                                                                                                                                                                                                                                                                                                               |       |             |                   |                                                                   |           |              |                                                                                                                                                                                                                                                                                                                                                                                                                                                                                                                                                                                                                                                                                                                                                                                                                                                                                                                                                                                                                                                                                                           |                                                                                                                            |
| Employment status          | -                                                                                                                                                                                                                                                                                                                                                                                                                                                                                                                                                                                                                                                                                                                                                                                                                                             | -                                                                                                                                                                                                                                                                                                                                                                                                                                                                                                                                                                                                                                                                                                                                                                                                                                                                                                                                                                                                                                                                                                                   |   |  |      |     |                    |       |        |          |      |                                                                                           |                                                                                                                                                                                                                                                                                                                                                                                                                                                                                                                                                                                                                                                                                                                                                                                                                                                                                                                                                                                                                                                                                                                                                                                                        |      |                                              |     |                                                                                                                                                                                 |                   |                                                                                                                                                                                                                                                                                                                                    |              |                                                                                                                                        |                                                 |                                         |                                                                              |                                                                                                                                                                                                                                                                                                                                                                                                                                                                                                                                                                                                                                                                                                                                                                                                                                                                                                                                                                                                                                                                                                                                                                                                                                                                                                                                                                                                                                                                                                                                                                                                                                                                                                                                                                                                                                                                                                                                                                                                                                                                       |                   |                                                                     |           |                                                                                                                                                                                                                                  |                                                                                                                                                                                                   |                                                                                                                                                                                                                                                                                                         |              |                                                                                                                                                      |     |                                                                                                                                                                                                                                                                                                                                                                                                                                                                                                                                                                                                                                                                                                                                                                                                                                               |       |             |                   |                                                                   |           |              |                                                                                                                                                                                                                                                                                                                                                                                                                                                                                                                                                                                                                                                                                                                                                                                                                                                                                                                                                                                                                                                                                                           |                                                                                                                            |
| other                      | Area where help is needed: "social isolation" n                                                                                                                                                                                                                                                                                                                                                                                                                                                                                                                                                                                                                                                                                                                                                                                               | 630                                                                                                                                                                                                                                                                                                                                                                                                                                                                                                                                                                                                                                                                                                                                                                                                                                                                                                                                                                                                                                                                                                                 |   |  |      |     |                    |       |        |          |      |                                                                                           |                                                                                                                                                                                                                                                                                                                                                                                                                                                                                                                                                                                                                                                                                                                                                                                                                                                                                                                                                                                                                                                                                                                                                                                                        |      |                                              |     |                                                                                                                                                                                 |                   |                                                                                                                                                                                                                                                                                                                                    |              |                                                                                                                                        |                                                 |                                         |                                                                              |                                                                                                                                                                                                                                                                                                                                                                                                                                                                                                                                                                                                                                                                                                                                                                                                                                                                                                                                                                                                                                                                                                                                                                                                                                                                                                                                                                                                                                                                                                                                                                                                                                                                                                                                                                                                                                                                                                                                                                                                                                                                       |                   |                                                                     |           |                                                                                                                                                                                                                                  |                                                                                                                                                                                                   |                                                                                                                                                                                                                                                                                                         |              |                                                                                                                                                      |     |                                                                                                                                                                                                                                                                                                                                                                                                                                                                                                                                                                                                                                                                                                                                                                                                                                               |       |             |                   |                                                                   |           |              |                                                                                                                                                                                                                                                                                                                                                                                                                                                                                                                                                                                                                                                                                                                                                                                                                                                                                                                                                                                                                                                                                                           |                                                                                                                            |
| Name                       | Prevention Matters                                                                                                                                                                                                                                                                                                                                                                                                                                                                                                                                                                                                                                                                                                                                                                                                                            |                                                                                                                                                                                                                                                                                                                                                                                                                                                                                                                                                                                                                                                                                                                                                                                                                                                                                                                                                                                                                                                                                                                     |   |  |      |     |                    |       |        |          |      |                                                                                           |                                                                                                                                                                                                                                                                                                                                                                                                                                                                                                                                                                                                                                                                                                                                                                                                                                                                                                                                                                                                                                                                                                                                                                                                        |      |                                              |     |                                                                                                                                                                                 |                   |                                                                                                                                                                                                                                                                                                                                    |              |                                                                                                                                        |                                                 |                                         |                                                                              |                                                                                                                                                                                                                                                                                                                                                                                                                                                                                                                                                                                                                                                                                                                                                                                                                                                                                                                                                                                                                                                                                                                                                                                                                                                                                                                                                                                                                                                                                                                                                                                                                                                                                                                                                                                                                                                                                                                                                                                                                                                                       |                   |                                                                     |           |                                                                                                                                                                                                                                  |                                                                                                                                                                                                   |                                                                                                                                                                                                                                                                                                         |              |                                                                                                                                                      |     |                                                                                                                                                                                                                                                                                                                                                                                                                                                                                                                                                                                                                                                                                                                                                                                                                                               |       |             |                   |                                                                   |           |              |                                                                                                                                                                                                                                                                                                                                                                                                                                                                                                                                                                                                                                                                                                                                                                                                                                                                                                                                                                                                                                                                                                           |                                                                                                                            |
| Why                        | Facilitate access to frontline community services and groups in Buckinghamshire, activating resources, also referred to as 'social assets', which are intended to contribute positively to reducing demand for adult social care                                                                                                                                                                                                                                                                                                                                                                                                                                                                                                                                                                                                              |                                                                                                                                                                                                                                                                                                                                                                                                                                                                                                                                                                                                                                                                                                                                                                                                                                                                                                                                                                                                                                                                                                                     |   |  |      |     |                    |       |        |          |      |                                                                                           |                                                                                                                                                                                                                                                                                                                                                                                                                                                                                                                                                                                                                                                                                                                                                                                                                                                                                                                                                                                                                                                                                                                                                                                                        |      |                                              |     |                                                                                                                                                                                 |                   |                                                                                                                                                                                                                                                                                                                                    |              |                                                                                                                                        |                                                 |                                         |                                                                              |                                                                                                                                                                                                                                                                                                                                                                                                                                                                                                                                                                                                                                                                                                                                                                                                                                                                                                                                                                                                                                                                                                                                                                                                                                                                                                                                                                                                                                                                                                                                                                                                                                                                                                                                                                                                                                                                                                                                                                                                                                                                       |                   |                                                                     |           |                                                                                                                                                                                                                                  |                                                                                                                                                                                                   |                                                                                                                                                                                                                                                                                                         |              |                                                                                                                                                      |     |                                                                                                                                                                                                                                                                                                                                                                                                                                                                                                                                                                                                                                                                                                                                                                                                                                               |       |             |                   |                                                                   |           |              |                                                                                                                                                                                                                                                                                                                                                                                                                                                                                                                                                                                                                                                                                                                                                                                                                                                                                                                                                                                                                                                                                                           |                                                                                                                            |
| What                       | Volunteer Hub: recruits volunteers and allocates them to volunteer hosting organisations<br><br>Time Credits, which is an approach to getting people involved in community activities in exchange for non-cash rewards worth the equivalent to the time they spend contributing to community activities                                                                                                                                                                                                                                                                                                                                                                                                                                                                                                                                       |                                                                                                                                                                                                                                                                                                                                                                                                                                                                                                                                                                                                                                                                                                                                                                                                                                                                                                                                                                                                                                                                                                                     |   |  |      |     |                    |       |        |          |      |                                                                                           |                                                                                                                                                                                                                                                                                                                                                                                                                                                                                                                                                                                                                                                                                                                                                                                                                                                                                                                                                                                                                                                                                                                                                                                                        |      |                                              |     |                                                                                                                                                                                 |                   |                                                                                                                                                                                                                                                                                                                                    |              |                                                                                                                                        |                                                 |                                         |                                                                              |                                                                                                                                                                                                                                                                                                                                                                                                                                                                                                                                                                                                                                                                                                                                                                                                                                                                                                                                                                                                                                                                                                                                                                                                                                                                                                                                                                                                                                                                                                                                                                                                                                                                                                                                                                                                                                                                                                                                                                                                                                                                       |                   |                                                                     |           |                                                                                                                                                                                                                                  |                                                                                                                                                                                                   |                                                                                                                                                                                                                                                                                                         |              |                                                                                                                                                      |     |                                                                                                                                                                                                                                                                                                                                                                                                                                                                                                                                                                                                                                                                                                                                                                                                                                               |       |             |                   |                                                                   |           |              |                                                                                                                                                                                                                                                                                                                                                                                                                                                                                                                                                                                                                                                                                                                                                                                                                                                                                                                                                                                                                                                                                                           |                                                                                                                            |
| Who provided               | 14 Community Practice Workers (CPWs) are aligned to the seven GP localities in Buckinghamshire, CPWs are supported by seven Community Links Officers                                                                                                                                                                                                                                                                                                                                                                                                                                                                                                                                                                                                                                                                                          |                                                                                                                                                                                                                                                                                                                                                                                                                                                                                                                                                                                                                                                                                                                                                                                                                                                                                                                                                                                                                                                                                                                     |   |  |      |     |                    |       |        |          |      |                                                                                           |                                                                                                                                                                                                                                                                                                                                                                                                                                                                                                                                                                                                                                                                                                                                                                                                                                                                                                                                                                                                                                                                                                                                                                                                        |      |                                              |     |                                                                                                                                                                                 |                   |                                                                                                                                                                                                                                                                                                                                    |              |                                                                                                                                        |                                                 |                                         |                                                                              |                                                                                                                                                                                                                                                                                                                                                                                                                                                                                                                                                                                                                                                                                                                                                                                                                                                                                                                                                                                                                                                                                                                                                                                                                                                                                                                                                                                                                                                                                                                                                                                                                                                                                                                                                                                                                                                                                                                                                                                                                                                                       |                   |                                                                     |           |                                                                                                                                                                                                                                  |                                                                                                                                                                                                   |                                                                                                                                                                                                                                                                                                         |              |                                                                                                                                                      |     |                                                                                                                                                                                                                                                                                                                                                                                                                                                                                                                                                                                                                                                                                                                                                                                                                                               |       |             |                   |                                                                   |           |              |                                                                                                                                                                                                                                                                                                                                                                                                                                                                                                                                                                                                                                                                                                                                                                                                                                                                                                                                                                                                                                                                                                           |                                                                                                                            |
| How                        | Step 1: Identification of prevention need, Step 2: referral, Step 3: assessment, Step 4: participation in community services and groups, Step 5: review; builds on a referral system, helps users access frontline community services and groups, including making sure that they are comfortable with their choice<br><br>- the needs of the program users are not met by the program itself, but by the frontline community services and groups to which users are referred through the program<br><br>- after assessment, the CPW agrees an action plan with the user<br><br>- all action plans involve a further referral to a frontline community service or group (e.g. to participate in a lunch club once a month)<br><br>- users engage with the CPWs again at the six- and 12-month reviews, after which the user exits the program |                                                                                                                                                                                                                                                                                                                                                                                                                                                                                                                                                                                                                                                                                                                                                                                                                                                                                                                                                                                                                                                                                                                     |   |  |      |     |                    |       |        |          |      |                                                                                           |                                                                                                                                                                                                                                                                                                                                                                                                                                                                                                                                                                                                                                                                                                                                                                                                                                                                                                                                                                                                                                                                                                                                                                                                        |      |                                              |     |                                                                                                                                                                                 |                   |                                                                                                                                                                                                                                                                                                                                    |              |                                                                                                                                        |                                                 |                                         |                                                                              |                                                                                                                                                                                                                                                                                                                                                                                                                                                                                                                                                                                                                                                                                                                                                                                                                                                                                                                                                                                                                                                                                                                                                                                                                                                                                                                                                                                                                                                                                                                                                                                                                                                                                                                                                                                                                                                                                                                                                                                                                                                                       |                   |                                                                     |           |                                                                                                                                                                                                                                  |                                                                                                                                                                                                   |                                                                                                                                                                                                                                                                                                         |              |                                                                                                                                                      |     |                                                                                                                                                                                                                                                                                                                                                                                                                                                                                                                                                                                                                                                                                                                                                                                                                                               |       |             |                   |                                                                   |           |              |                                                                                                                                                                                                                                                                                                                                                                                                                                                                                                                                                                                                                                                                                                                                                                                                                                                                                                                                                                                                                                                                                                           |                                                                                                                            |
| Where                      | Home visits                                                                                                                                                                                                                                                                                                                                                                                                                                                                                                                                                                                                                                                                                                                                                                                                                                   |                                                                                                                                                                                                                                                                                                                                                                                                                                                                                                                                                                                                                                                                                                                                                                                                                                                                                                                                                                                                                                                                                                                     |   |  |      |     |                    |       |        |          |      |                                                                                           |                                                                                                                                                                                                                                                                                                                                                                                                                                                                                                                                                                                                                                                                                                                                                                                                                                                                                                                                                                                                                                                                                                                                                                                                        |      |                                              |     |                                                                                                                                                                                 |                   |                                                                                                                                                                                                                                                                                                                                    |              |                                                                                                                                        |                                                 |                                         |                                                                              |                                                                                                                                                                                                                                                                                                                                                                                                                                                                                                                                                                                                                                                                                                                                                                                                                                                                                                                                                                                                                                                                                                                                                                                                                                                                                                                                                                                                                                                                                                                                                                                                                                                                                                                                                                                                                                                                                                                                                                                                                                                                       |                   |                                                                     |           |                                                                                                                                                                                                                                  |                                                                                                                                                                                                   |                                                                                                                                                                                                                                                                                                         |              |                                                                                                                                                      |     |                                                                                                                                                                                                                                                                                                                                                                                                                                                                                                                                                                                                                                                                                                                                                                                                                                               |       |             |                   |                                                                   |           |              |                                                                                                                                                                                                                                                                                                                                                                                                                                                                                                                                                                                                                                                                                                                                                                                                                                                                                                                                                                                                                                                                                                           |                                                                                                                            |
| When and how much          | initial assessment and again after six and 12 months for a review                                                                                                                                                                                                                                                                                                                                                                                                                                                                                                                                                                                                                                                                                                                                                                             |                                                                                                                                                                                                                                                                                                                                                                                                                                                                                                                                                                                                                                                                                                                                                                                                                                                                                                                                                                                                                                                                                                                     |   |  |      |     |                    |       |        |          |      |                                                                                           |                                                                                                                                                                                                                                                                                                                                                                                                                                                                                                                                                                                                                                                                                                                                                                                                                                                                                                                                                                                                                                                                                                                                                                                                        |      |                                              |     |                                                                                                                                                                                 |                   |                                                                                                                                                                                                                                                                                                                                    |              |                                                                                                                                        |                                                 |                                         |                                                                              |                                                                                                                                                                                                                                                                                                                                                                                                                                                                                                                                                                                                                                                                                                                                                                                                                                                                                                                                                                                                                                                                                                                                                                                                                                                                                                                                                                                                                                                                                                                                                                                                                                                                                                                                                                                                                                                                                                                                                                                                                                                                       |                   |                                                                     |           |                                                                                                                                                                                                                                  |                                                                                                                                                                                                   |                                                                                                                                                                                                                                                                                                         |              |                                                                                                                                                      |     |                                                                                                                                                                                                                                                                                                                                                                                                                                                                                                                                                                                                                                                                                                                                                                                                                                               |       |             |                   |                                                                   |           |              |                                                                                                                                                                                                                                                                                                                                                                                                                                                                                                                                                                                                                                                                                                                                                                                                                                                                                                                                                                                                                                                                                                           |                                                                                                                            |
| Tailoring                  | Personalized                                                                                                                                                                                                                                                                                                                                                                                                                                                                                                                                                                                                                                                                                                                                                                                                                                  |                                                                                                                                                                                                                                                                                                                                                                                                                                                                                                                                                                                                                                                                                                                                                                                                                                                                                                                                                                                                                                                                                                                     |   |  |      |     |                    |       |        |          |      |                                                                                           |                                                                                                                                                                                                                                                                                                                                                                                                                                                                                                                                                                                                                                                                                                                                                                                                                                                                                                                                                                                                                                                                                                                                                                                                        |      |                                              |     |                                                                                                                                                                                 |                   |                                                                                                                                                                                                                                                                                                                                    |              |                                                                                                                                        |                                                 |                                         |                                                                              |                                                                                                                                                                                                                                                                                                                                                                                                                                                                                                                                                                                                                                                                                                                                                                                                                                                                                                                                                                                                                                                                                                                                                                                                                                                                                                                                                                                                                                                                                                                                                                                                                                                                                                                                                                                                                                                                                                                                                                                                                                                                       |                   |                                                                     |           |                                                                                                                                                                                                                                  |                                                                                                                                                                                                   |                                                                                                                                                                                                                                                                                                         |              |                                                                                                                                                      |     |                                                                                                                                                                                                                                                                                                                                                                                                                                                                                                                                                                                                                                                                                                                                                                                                                                               |       |             |                   |                                                                   |           |              |                                                                                                                                                                                                                                                                                                                                                                                                                                                                                                                                                                                                                                                                                                                                                                                                                                                                                                                                                                                                                                                                                                           |                                                                                                                            |
| <p>Baines 2015 (41)</p>    | <p>Uncontrolled before-and-after study, mixed-methods</p> <p>Study length: unclear</p>                                                                                                                                                                                                                                                                                                                                                                                                                                                                                                                                                                                                                                                                                                                                                        | <p><b>Inclusion criteria:</b></p> <ul style="list-style-type: none"> <li>- persons who had experienced a recent change in their circumstances (e.g. bereavement or diagnosis of a chronic condition)</li> <li>- aged over 18</li> </ul> <p><b>Exclusion criteria:</b></p> <ul style="list-style-type: none"> <li>-patients with high risk or acute mental health conditions were outside the scope of the project</li> </ul> <p>Baseline characteristics:</p> <table border="1" data-bbox="477 1772 1077 1898"> <tr> <td>N</td> <td></td> <td>39</td> </tr> <tr> <td>Age</td> <td>Range</td> <td>25-91</td> </tr> <tr> <td>Gender</td> <td>Female %</td> <td>56.7</td> </tr> </table>                                                                                                                                                                                                                                                                                                                                                                                                                               | N |  | 39   | Age | Range              | 25-91 | Gender | Female % | 56.7 | <p>Primary care: GP surgeries</p> <p>Country: UK (Rugby, Warwickshire, West Midlands)</p> | <table border="1" data-bbox="1308 1367 2240 1898"> <tr> <td>Name</td> <td>Rugby Social Prescribing Project (Rugby SPP)</td> </tr> <tr> <td>Why</td> <td>Assist people in addressing underlying societal causes or manage compounding factors of ill-health by unlocking and aligning the many resources and community assets that exist</td> </tr> <tr> <td>What</td> <td>Mainly referral by GP (from 4 surgeries), choose between two routs: 1. Wellness-Coordinator = intensive support, meeting and assignment to Health Buddies (support and assessment), 2. Navigator = information and signposting only, 707 voluntary and community sector organisations and activities are available for signposting</td> </tr> <tr> <td>Who provided</td> <td>6 trained volunteer advisors (Navigators), 6 volunteers trained as Health Buddies to assist on a one-to-one basis over a 6 week period</td> </tr> <tr> <td>How</td> <td>One-to-one, follow up via phone, e-mail</td> </tr> <tr> <td>Where</td> <td>-</td> </tr> <tr> <td>When and How much</td> <td>6-week period, Navigator: up to 3 occasions by phone, email or post</td> </tr> <tr> <td>Tailoring</td> <td>Personalized</td> </tr> </table> | Name | Rugby Social Prescribing Project (Rugby SPP) | Why | Assist people in addressing underlying societal causes or manage compounding factors of ill-health by unlocking and aligning the many resources and community assets that exist | What              | Mainly referral by GP (from 4 surgeries), choose between two routs: 1. Wellness-Coordinator = intensive support, meeting and assignment to Health Buddies (support and assessment), 2. Navigator = information and signposting only, 707 voluntary and community sector organisations and activities are available for signposting | Who provided | 6 trained volunteer advisors (Navigators), 6 volunteers trained as Health Buddies to assist on a one-to-one basis over a 6 week period | How                                             | One-to-one, follow up via phone, e-mail | Where                                                                        | -                                                                                                                                                                                                                                                                                                                                                                                                                                                                                                                                                                                                                                                                                                                                                                                                                                                                                                                                                                                                                                                                                                                                                                                                                                                                                                                                                                                                                                                                                                                                                                                                                                                                                                                                                                                                                                                                                                                                                                                                                                                                     | When and How much | 6-week period, Navigator: up to 3 occasions by phone, email or post | Tailoring | Personalized                                                                                                                                                                                                                     | <p>Patient outcomes at baseline and 4-weeks follow-up assessed by Health Buddy clients:</p> <ul style="list-style-type: none"> <li>- -Warwick Edinburgh Mental Wellbeing Scale (WEMBS)</li> </ul> | <p>Peer-Review: No</p> <p>Funding source: Conventry &amp; Rugby Clinical Commissioning Group</p> <p>Declaration of interest: not mentioned</p>                                                                                                                                                          |              |                                                                                                                                                      |     |                                                                                                                                                                                                                                                                                                                                                                                                                                                                                                                                                                                                                                                                                                                                                                                                                                               |       |             |                   |                                                                   |           |              |                                                                                                                                                                                                                                                                                                                                                                                                                                                                                                                                                                                                                                                                                                                                                                                                                                                                                                                                                                                                                                                                                                           |                                                                                                                            |
| N                          |                                                                                                                                                                                                                                                                                                                                                                                                                                                                                                                                                                                                                                                                                                                                                                                                                                               | 39                                                                                                                                                                                                                                                                                                                                                                                                                                                                                                                                                                                                                                                                                                                                                                                                                                                                                                                                                                                                                                                                                                                  |   |  |      |     |                    |       |        |          |      |                                                                                           |                                                                                                                                                                                                                                                                                                                                                                                                                                                                                                                                                                                                                                                                                                                                                                                                                                                                                                                                                                                                                                                                                                                                                                                                        |      |                                              |     |                                                                                                                                                                                 |                   |                                                                                                                                                                                                                                                                                                                                    |              |                                                                                                                                        |                                                 |                                         |                                                                              |                                                                                                                                                                                                                                                                                                                                                                                                                                                                                                                                                                                                                                                                                                                                                                                                                                                                                                                                                                                                                                                                                                                                                                                                                                                                                                                                                                                                                                                                                                                                                                                                                                                                                                                                                                                                                                                                                                                                                                                                                                                                       |                   |                                                                     |           |                                                                                                                                                                                                                                  |                                                                                                                                                                                                   |                                                                                                                                                                                                                                                                                                         |              |                                                                                                                                                      |     |                                                                                                                                                                                                                                                                                                                                                                                                                                                                                                                                                                                                                                                                                                                                                                                                                                               |       |             |                   |                                                                   |           |              |                                                                                                                                                                                                                                                                                                                                                                                                                                                                                                                                                                                                                                                                                                                                                                                                                                                                                                                                                                                                                                                                                                           |                                                                                                                            |
| Age                        | Range                                                                                                                                                                                                                                                                                                                                                                                                                                                                                                                                                                                                                                                                                                                                                                                                                                         | 25-91                                                                                                                                                                                                                                                                                                                                                                                                                                                                                                                                                                                                                                                                                                                                                                                                                                                                                                                                                                                                                                                                                                               |   |  |      |     |                    |       |        |          |      |                                                                                           |                                                                                                                                                                                                                                                                                                                                                                                                                                                                                                                                                                                                                                                                                                                                                                                                                                                                                                                                                                                                                                                                                                                                                                                                        |      |                                              |     |                                                                                                                                                                                 |                   |                                                                                                                                                                                                                                                                                                                                    |              |                                                                                                                                        |                                                 |                                         |                                                                              |                                                                                                                                                                                                                                                                                                                                                                                                                                                                                                                                                                                                                                                                                                                                                                                                                                                                                                                                                                                                                                                                                                                                                                                                                                                                                                                                                                                                                                                                                                                                                                                                                                                                                                                                                                                                                                                                                                                                                                                                                                                                       |                   |                                                                     |           |                                                                                                                                                                                                                                  |                                                                                                                                                                                                   |                                                                                                                                                                                                                                                                                                         |              |                                                                                                                                                      |     |                                                                                                                                                                                                                                                                                                                                                                                                                                                                                                                                                                                                                                                                                                                                                                                                                                               |       |             |                   |                                                                   |           |              |                                                                                                                                                                                                                                                                                                                                                                                                                                                                                                                                                                                                                                                                                                                                                                                                                                                                                                                                                                                                                                                                                                           |                                                                                                                            |
| Gender                     | Female %                                                                                                                                                                                                                                                                                                                                                                                                                                                                                                                                                                                                                                                                                                                                                                                                                                      | 56.7                                                                                                                                                                                                                                                                                                                                                                                                                                                                                                                                                                                                                                                                                                                                                                                                                                                                                                                                                                                                                                                                                                                |   |  |      |     |                    |       |        |          |      |                                                                                           |                                                                                                                                                                                                                                                                                                                                                                                                                                                                                                                                                                                                                                                                                                                                                                                                                                                                                                                                                                                                                                                                                                                                                                                                        |      |                                              |     |                                                                                                                                                                                 |                   |                                                                                                                                                                                                                                                                                                                                    |              |                                                                                                                                        |                                                 |                                         |                                                                              |                                                                                                                                                                                                                                                                                                                                                                                                                                                                                                                                                                                                                                                                                                                                                                                                                                                                                                                                                                                                                                                                                                                                                                                                                                                                                                                                                                                                                                                                                                                                                                                                                                                                                                                                                                                                                                                                                                                                                                                                                                                                       |                   |                                                                     |           |                                                                                                                                                                                                                                  |                                                                                                                                                                                                   |                                                                                                                                                                                                                                                                                                         |              |                                                                                                                                                      |     |                                                                                                                                                                                                                                                                                                                                                                                                                                                                                                                                                                                                                                                                                                                                                                                                                                               |       |             |                   |                                                                   |           |              |                                                                                                                                                                                                                                                                                                                                                                                                                                                                                                                                                                                                                                                                                                                                                                                                                                                                                                                                                                                                                                                                                                           |                                                                                                                            |
| Name                       | Rugby Social Prescribing Project (Rugby SPP)                                                                                                                                                                                                                                                                                                                                                                                                                                                                                                                                                                                                                                                                                                                                                                                                  |                                                                                                                                                                                                                                                                                                                                                                                                                                                                                                                                                                                                                                                                                                                                                                                                                                                                                                                                                                                                                                                                                                                     |   |  |      |     |                    |       |        |          |      |                                                                                           |                                                                                                                                                                                                                                                                                                                                                                                                                                                                                                                                                                                                                                                                                                                                                                                                                                                                                                                                                                                                                                                                                                                                                                                                        |      |                                              |     |                                                                                                                                                                                 |                   |                                                                                                                                                                                                                                                                                                                                    |              |                                                                                                                                        |                                                 |                                         |                                                                              |                                                                                                                                                                                                                                                                                                                                                                                                                                                                                                                                                                                                                                                                                                                                                                                                                                                                                                                                                                                                                                                                                                                                                                                                                                                                                                                                                                                                                                                                                                                                                                                                                                                                                                                                                                                                                                                                                                                                                                                                                                                                       |                   |                                                                     |           |                                                                                                                                                                                                                                  |                                                                                                                                                                                                   |                                                                                                                                                                                                                                                                                                         |              |                                                                                                                                                      |     |                                                                                                                                                                                                                                                                                                                                                                                                                                                                                                                                                                                                                                                                                                                                                                                                                                               |       |             |                   |                                                                   |           |              |                                                                                                                                                                                                                                                                                                                                                                                                                                                                                                                                                                                                                                                                                                                                                                                                                                                                                                                                                                                                                                                                                                           |                                                                                                                            |
| Why                        | Assist people in addressing underlying societal causes or manage compounding factors of ill-health by unlocking and aligning the many resources and community assets that exist                                                                                                                                                                                                                                                                                                                                                                                                                                                                                                                                                                                                                                                               |                                                                                                                                                                                                                                                                                                                                                                                                                                                                                                                                                                                                                                                                                                                                                                                                                                                                                                                                                                                                                                                                                                                     |   |  |      |     |                    |       |        |          |      |                                                                                           |                                                                                                                                                                                                                                                                                                                                                                                                                                                                                                                                                                                                                                                                                                                                                                                                                                                                                                                                                                                                                                                                                                                                                                                                        |      |                                              |     |                                                                                                                                                                                 |                   |                                                                                                                                                                                                                                                                                                                                    |              |                                                                                                                                        |                                                 |                                         |                                                                              |                                                                                                                                                                                                                                                                                                                                                                                                                                                                                                                                                                                                                                                                                                                                                                                                                                                                                                                                                                                                                                                                                                                                                                                                                                                                                                                                                                                                                                                                                                                                                                                                                                                                                                                                                                                                                                                                                                                                                                                                                                                                       |                   |                                                                     |           |                                                                                                                                                                                                                                  |                                                                                                                                                                                                   |                                                                                                                                                                                                                                                                                                         |              |                                                                                                                                                      |     |                                                                                                                                                                                                                                                                                                                                                                                                                                                                                                                                                                                                                                                                                                                                                                                                                                               |       |             |                   |                                                                   |           |              |                                                                                                                                                                                                                                                                                                                                                                                                                                                                                                                                                                                                                                                                                                                                                                                                                                                                                                                                                                                                                                                                                                           |                                                                                                                            |
| What                       | Mainly referral by GP (from 4 surgeries), choose between two routs: 1. Wellness-Coordinator = intensive support, meeting and assignment to Health Buddies (support and assessment), 2. Navigator = information and signposting only, 707 voluntary and community sector organisations and activities are available for signposting                                                                                                                                                                                                                                                                                                                                                                                                                                                                                                            |                                                                                                                                                                                                                                                                                                                                                                                                                                                                                                                                                                                                                                                                                                                                                                                                                                                                                                                                                                                                                                                                                                                     |   |  |      |     |                    |       |        |          |      |                                                                                           |                                                                                                                                                                                                                                                                                                                                                                                                                                                                                                                                                                                                                                                                                                                                                                                                                                                                                                                                                                                                                                                                                                                                                                                                        |      |                                              |     |                                                                                                                                                                                 |                   |                                                                                                                                                                                                                                                                                                                                    |              |                                                                                                                                        |                                                 |                                         |                                                                              |                                                                                                                                                                                                                                                                                                                                                                                                                                                                                                                                                                                                                                                                                                                                                                                                                                                                                                                                                                                                                                                                                                                                                                                                                                                                                                                                                                                                                                                                                                                                                                                                                                                                                                                                                                                                                                                                                                                                                                                                                                                                       |                   |                                                                     |           |                                                                                                                                                                                                                                  |                                                                                                                                                                                                   |                                                                                                                                                                                                                                                                                                         |              |                                                                                                                                                      |     |                                                                                                                                                                                                                                                                                                                                                                                                                                                                                                                                                                                                                                                                                                                                                                                                                                               |       |             |                   |                                                                   |           |              |                                                                                                                                                                                                                                                                                                                                                                                                                                                                                                                                                                                                                                                                                                                                                                                                                                                                                                                                                                                                                                                                                                           |                                                                                                                            |
| Who provided               | 6 trained volunteer advisors (Navigators), 6 volunteers trained as Health Buddies to assist on a one-to-one basis over a 6 week period                                                                                                                                                                                                                                                                                                                                                                                                                                                                                                                                                                                                                                                                                                        |                                                                                                                                                                                                                                                                                                                                                                                                                                                                                                                                                                                                                                                                                                                                                                                                                                                                                                                                                                                                                                                                                                                     |   |  |      |     |                    |       |        |          |      |                                                                                           |                                                                                                                                                                                                                                                                                                                                                                                                                                                                                                                                                                                                                                                                                                                                                                                                                                                                                                                                                                                                                                                                                                                                                                                                        |      |                                              |     |                                                                                                                                                                                 |                   |                                                                                                                                                                                                                                                                                                                                    |              |                                                                                                                                        |                                                 |                                         |                                                                              |                                                                                                                                                                                                                                                                                                                                                                                                                                                                                                                                                                                                                                                                                                                                                                                                                                                                                                                                                                                                                                                                                                                                                                                                                                                                                                                                                                                                                                                                                                                                                                                                                                                                                                                                                                                                                                                                                                                                                                                                                                                                       |                   |                                                                     |           |                                                                                                                                                                                                                                  |                                                                                                                                                                                                   |                                                                                                                                                                                                                                                                                                         |              |                                                                                                                                                      |     |                                                                                                                                                                                                                                                                                                                                                                                                                                                                                                                                                                                                                                                                                                                                                                                                                                               |       |             |                   |                                                                   |           |              |                                                                                                                                                                                                                                                                                                                                                                                                                                                                                                                                                                                                                                                                                                                                                                                                                                                                                                                                                                                                                                                                                                           |                                                                                                                            |
| How                        | One-to-one, follow up via phone, e-mail                                                                                                                                                                                                                                                                                                                                                                                                                                                                                                                                                                                                                                                                                                                                                                                                       |                                                                                                                                                                                                                                                                                                                                                                                                                                                                                                                                                                                                                                                                                                                                                                                                                                                                                                                                                                                                                                                                                                                     |   |  |      |     |                    |       |        |          |      |                                                                                           |                                                                                                                                                                                                                                                                                                                                                                                                                                                                                                                                                                                                                                                                                                                                                                                                                                                                                                                                                                                                                                                                                                                                                                                                        |      |                                              |     |                                                                                                                                                                                 |                   |                                                                                                                                                                                                                                                                                                                                    |              |                                                                                                                                        |                                                 |                                         |                                                                              |                                                                                                                                                                                                                                                                                                                                                                                                                                                                                                                                                                                                                                                                                                                                                                                                                                                                                                                                                                                                                                                                                                                                                                                                                                                                                                                                                                                                                                                                                                                                                                                                                                                                                                                                                                                                                                                                                                                                                                                                                                                                       |                   |                                                                     |           |                                                                                                                                                                                                                                  |                                                                                                                                                                                                   |                                                                                                                                                                                                                                                                                                         |              |                                                                                                                                                      |     |                                                                                                                                                                                                                                                                                                                                                                                                                                                                                                                                                                                                                                                                                                                                                                                                                                               |       |             |                   |                                                                   |           |              |                                                                                                                                                                                                                                                                                                                                                                                                                                                                                                                                                                                                                                                                                                                                                                                                                                                                                                                                                                                                                                                                                                           |                                                                                                                            |
| Where                      | -                                                                                                                                                                                                                                                                                                                                                                                                                                                                                                                                                                                                                                                                                                                                                                                                                                             |                                                                                                                                                                                                                                                                                                                                                                                                                                                                                                                                                                                                                                                                                                                                                                                                                                                                                                                                                                                                                                                                                                                     |   |  |      |     |                    |       |        |          |      |                                                                                           |                                                                                                                                                                                                                                                                                                                                                                                                                                                                                                                                                                                                                                                                                                                                                                                                                                                                                                                                                                                                                                                                                                                                                                                                        |      |                                              |     |                                                                                                                                                                                 |                   |                                                                                                                                                                                                                                                                                                                                    |              |                                                                                                                                        |                                                 |                                         |                                                                              |                                                                                                                                                                                                                                                                                                                                                                                                                                                                                                                                                                                                                                                                                                                                                                                                                                                                                                                                                                                                                                                                                                                                                                                                                                                                                                                                                                                                                                                                                                                                                                                                                                                                                                                                                                                                                                                                                                                                                                                                                                                                       |                   |                                                                     |           |                                                                                                                                                                                                                                  |                                                                                                                                                                                                   |                                                                                                                                                                                                                                                                                                         |              |                                                                                                                                                      |     |                                                                                                                                                                                                                                                                                                                                                                                                                                                                                                                                                                                                                                                                                                                                                                                                                                               |       |             |                   |                                                                   |           |              |                                                                                                                                                                                                                                                                                                                                                                                                                                                                                                                                                                                                                                                                                                                                                                                                                                                                                                                                                                                                                                                                                                           |                                                                                                                            |
| When and How much          | 6-week period, Navigator: up to 3 occasions by phone, email or post                                                                                                                                                                                                                                                                                                                                                                                                                                                                                                                                                                                                                                                                                                                                                                           |                                                                                                                                                                                                                                                                                                                                                                                                                                                                                                                                                                                                                                                                                                                                                                                                                                                                                                                                                                                                                                                                                                                     |   |  |      |     |                    |       |        |          |      |                                                                                           |                                                                                                                                                                                                                                                                                                                                                                                                                                                                                                                                                                                                                                                                                                                                                                                                                                                                                                                                                                                                                                                                                                                                                                                                        |      |                                              |     |                                                                                                                                                                                 |                   |                                                                                                                                                                                                                                                                                                                                    |              |                                                                                                                                        |                                                 |                                         |                                                                              |                                                                                                                                                                                                                                                                                                                                                                                                                                                                                                                                                                                                                                                                                                                                                                                                                                                                                                                                                                                                                                                                                                                                                                                                                                                                                                                                                                                                                                                                                                                                                                                                                                                                                                                                                                                                                                                                                                                                                                                                                                                                       |                   |                                                                     |           |                                                                                                                                                                                                                                  |                                                                                                                                                                                                   |                                                                                                                                                                                                                                                                                                         |              |                                                                                                                                                      |     |                                                                                                                                                                                                                                                                                                                                                                                                                                                                                                                                                                                                                                                                                                                                                                                                                                               |       |             |                   |                                                                   |           |              |                                                                                                                                                                                                                                                                                                                                                                                                                                                                                                                                                                                                                                                                                                                                                                                                                                                                                                                                                                                                                                                                                                           |                                                                                                                            |
| Tailoring                  | Personalized                                                                                                                                                                                                                                                                                                                                                                                                                                                                                                                                                                                                                                                                                                                                                                                                                                  |                                                                                                                                                                                                                                                                                                                                                                                                                                                                                                                                                                                                                                                                                                                                                                                                                                                                                                                                                                                                                                                                                                                     |   |  |      |     |                    |       |        |          |      |                                                                                           |                                                                                                                                                                                                                                                                                                                                                                                                                                                                                                                                                                                                                                                                                                                                                                                                                                                                                                                                                                                                                                                                                                                                                                                                        |      |                                              |     |                                                                                                                                                                                 |                   |                                                                                                                                                                                                                                                                                                                                    |              |                                                                                                                                        |                                                 |                                         |                                                                              |                                                                                                                                                                                                                                                                                                                                                                                                                                                                                                                                                                                                                                                                                                                                                                                                                                                                                                                                                                                                                                                                                                                                                                                                                                                                                                                                                                                                                                                                                                                                                                                                                                                                                                                                                                                                                                                                                                                                                                                                                                                                       |                   |                                                                     |           |                                                                                                                                                                                                                                  |                                                                                                                                                                                                   |                                                                                                                                                                                                                                                                                                         |              |                                                                                                                                                      |     |                                                                                                                                                                                                                                                                                                                                                                                                                                                                                                                                                                                                                                                                                                                                                                                                                                               |       |             |                   |                                                                   |           |              |                                                                                                                                                                                                                                                                                                                                                                                                                                                                                                                                                                                                                                                                                                                                                                                                                                                                                                                                                                                                                                                                                                           |                                                                                                                            |

|                    |                                                                                                                                                                                                                                                                                                                                                                                                  |                                                                                                                                                                                                                                                                                                                                                                                                                                                                                                                                                                                |           |   |    |                    |       |       |                   |          |    |           |                 |     |                    |                                                                                                                                                                   |               |                                                              |   |   |       |   |   |                                                                        |                                                                                                                                                                                                                                                                                                                                                                                                                                                                                                                                                                                                                                                                                                                                                                                                                                                                                                                                                                                                                                                                                                                                                                                                                                                                                                                                                                                           |      |                                        |     |                                                                                                                                                                                                                                                                                                           |      |                                                                                                                                                                                                                                                                                                                                                                                                  |              |         |     |              |       |                                                               |                   |                                                                                                                                                                     |           |              |                                                                                                                                                                                                                                   |                                                                                               |
|--------------------|--------------------------------------------------------------------------------------------------------------------------------------------------------------------------------------------------------------------------------------------------------------------------------------------------------------------------------------------------------------------------------------------------|--------------------------------------------------------------------------------------------------------------------------------------------------------------------------------------------------------------------------------------------------------------------------------------------------------------------------------------------------------------------------------------------------------------------------------------------------------------------------------------------------------------------------------------------------------------------------------|-----------|---|----|--------------------|-------|-------|-------------------|----------|----|-----------|-----------------|-----|--------------------|-------------------------------------------------------------------------------------------------------------------------------------------------------------------|---------------|--------------------------------------------------------------|---|---|-------|---|---|------------------------------------------------------------------------|-------------------------------------------------------------------------------------------------------------------------------------------------------------------------------------------------------------------------------------------------------------------------------------------------------------------------------------------------------------------------------------------------------------------------------------------------------------------------------------------------------------------------------------------------------------------------------------------------------------------------------------------------------------------------------------------------------------------------------------------------------------------------------------------------------------------------------------------------------------------------------------------------------------------------------------------------------------------------------------------------------------------------------------------------------------------------------------------------------------------------------------------------------------------------------------------------------------------------------------------------------------------------------------------------------------------------------------------------------------------------------------------|------|----------------------------------------|-----|-----------------------------------------------------------------------------------------------------------------------------------------------------------------------------------------------------------------------------------------------------------------------------------------------------------|------|--------------------------------------------------------------------------------------------------------------------------------------------------------------------------------------------------------------------------------------------------------------------------------------------------------------------------------------------------------------------------------------------------|--------------|---------|-----|--------------|-------|---------------------------------------------------------------|-------------------|---------------------------------------------------------------------------------------------------------------------------------------------------------------------|-----------|--------------|-----------------------------------------------------------------------------------------------------------------------------------------------------------------------------------------------------------------------------------|-----------------------------------------------------------------------------------------------|
|                    |                                                                                                                                                                                                                                                                                                                                                                                                  | <table border="1"> <tr> <td>Ethnicity</td> <td>-</td> <td>-</td> </tr> <tr> <td>Living arrangement</td> <td>-</td> <td>-</td> </tr> <tr> <td>Employment status</td> <td>-</td> <td>-</td> </tr> <tr> <td>other</td> <td>-</td> <td>-</td> </tr> </table> <p>Population: General</p>                                                                                                                                                                                                                                                                                            | Ethnicity | - | -  | Living arrangement | -     | -     | Employment status | -        | -  | other     | -               | -   |                    | <table border="1"> <tr> <td>Modifications</td> <td>Until March 2015 no direct contact with the service provider</td> </tr> </table> <p>Intervention: Holistic</p> | Modifications | Until March 2015 no direct contact with the service provider |   |   |       |   |   |                                                                        |                                                                                                                                                                                                                                                                                                                                                                                                                                                                                                                                                                                                                                                                                                                                                                                                                                                                                                                                                                                                                                                                                                                                                                                                                                                                                                                                                                                           |      |                                        |     |                                                                                                                                                                                                                                                                                                           |      |                                                                                                                                                                                                                                                                                                                                                                                                  |              |         |     |              |       |                                                               |                   |                                                                                                                                                                     |           |              |                                                                                                                                                                                                                                   |                                                                                               |
| Ethnicity          | -                                                                                                                                                                                                                                                                                                                                                                                                | -                                                                                                                                                                                                                                                                                                                                                                                                                                                                                                                                                                              |           |   |    |                    |       |       |                   |          |    |           |                 |     |                    |                                                                                                                                                                   |               |                                                              |   |   |       |   |   |                                                                        |                                                                                                                                                                                                                                                                                                                                                                                                                                                                                                                                                                                                                                                                                                                                                                                                                                                                                                                                                                                                                                                                                                                                                                                                                                                                                                                                                                                           |      |                                        |     |                                                                                                                                                                                                                                                                                                           |      |                                                                                                                                                                                                                                                                                                                                                                                                  |              |         |     |              |       |                                                               |                   |                                                                                                                                                                     |           |              |                                                                                                                                                                                                                                   |                                                                                               |
| Living arrangement | -                                                                                                                                                                                                                                                                                                                                                                                                | -                                                                                                                                                                                                                                                                                                                                                                                                                                                                                                                                                                              |           |   |    |                    |       |       |                   |          |    |           |                 |     |                    |                                                                                                                                                                   |               |                                                              |   |   |       |   |   |                                                                        |                                                                                                                                                                                                                                                                                                                                                                                                                                                                                                                                                                                                                                                                                                                                                                                                                                                                                                                                                                                                                                                                                                                                                                                                                                                                                                                                                                                           |      |                                        |     |                                                                                                                                                                                                                                                                                                           |      |                                                                                                                                                                                                                                                                                                                                                                                                  |              |         |     |              |       |                                                               |                   |                                                                                                                                                                     |           |              |                                                                                                                                                                                                                                   |                                                                                               |
| Employment status  | -                                                                                                                                                                                                                                                                                                                                                                                                | -                                                                                                                                                                                                                                                                                                                                                                                                                                                                                                                                                                              |           |   |    |                    |       |       |                   |          |    |           |                 |     |                    |                                                                                                                                                                   |               |                                                              |   |   |       |   |   |                                                                        |                                                                                                                                                                                                                                                                                                                                                                                                                                                                                                                                                                                                                                                                                                                                                                                                                                                                                                                                                                                                                                                                                                                                                                                                                                                                                                                                                                                           |      |                                        |     |                                                                                                                                                                                                                                                                                                           |      |                                                                                                                                                                                                                                                                                                                                                                                                  |              |         |     |              |       |                                                               |                   |                                                                                                                                                                     |           |              |                                                                                                                                                                                                                                   |                                                                                               |
| other              | -                                                                                                                                                                                                                                                                                                                                                                                                | -                                                                                                                                                                                                                                                                                                                                                                                                                                                                                                                                                                              |           |   |    |                    |       |       |                   |          |    |           |                 |     |                    |                                                                                                                                                                   |               |                                                              |   |   |       |   |   |                                                                        |                                                                                                                                                                                                                                                                                                                                                                                                                                                                                                                                                                                                                                                                                                                                                                                                                                                                                                                                                                                                                                                                                                                                                                                                                                                                                                                                                                                           |      |                                        |     |                                                                                                                                                                                                                                                                                                           |      |                                                                                                                                                                                                                                                                                                                                                                                                  |              |         |     |              |       |                                                               |                   |                                                                                                                                                                     |           |              |                                                                                                                                                                                                                                   |                                                                                               |
| Modifications      | Until March 2015 no direct contact with the service provider                                                                                                                                                                                                                                                                                                                                     |                                                                                                                                                                                                                                                                                                                                                                                                                                                                                                                                                                                |           |   |    |                    |       |       |                   |          |    |           |                 |     |                    |                                                                                                                                                                   |               |                                                              |   |   |       |   |   |                                                                        |                                                                                                                                                                                                                                                                                                                                                                                                                                                                                                                                                                                                                                                                                                                                                                                                                                                                                                                                                                                                                                                                                                                                                                                                                                                                                                                                                                                           |      |                                        |     |                                                                                                                                                                                                                                                                                                           |      |                                                                                                                                                                                                                                                                                                                                                                                                  |              |         |     |              |       |                                                               |                   |                                                                                                                                                                     |           |              |                                                                                                                                                                                                                                   |                                                                                               |
| Baker 2017 (42)    | <p>Uncontrolled before-and-after study, mixed-methods</p> <p>Study length: 12 months</p>                                                                                                                                                                                                                                                                                                         | <p><b>Inclusion criteria:</b> -</p> <p><b>Exclusion criteria:</b> -</p> <p><b>Baseline characteristics:</b></p> <table border="1"> <tr> <td>N</td> <td></td> <td>15</td> </tr> <tr> <td>Age</td> <td>Range</td> <td>39-84</td> </tr> <tr> <td>Gender</td> <td>Female %</td> <td>80</td> </tr> <tr> <td>Ethnicity</td> <td>White British %</td> <td>100</td> </tr> <tr> <td>Living arrangement</td> <td>-</td> <td>-</td> </tr> <tr> <td>Employment status</td> <td>-</td> <td>-</td> </tr> <tr> <td>other</td> <td>-</td> <td>-</td> </tr> </table> <p>Population: General</p> | N         |   | 15 | Age                | Range | 39-84 | Gender            | Female % | 80 | Ethnicity | White British % | 100 | Living arrangement | -                                                                                                                                                                 | -             | Employment status                                            | - | - | other | - | - | <p>Primary care</p> <p>Country: UK (Wiltshire, South West England)</p> | <table border="1"> <tr> <td>Name</td> <td>Artlift Wiltshire Move on Groups (MoG)</td> </tr> <tr> <td>Why</td> <td>Patients are referred for a range of reasons including: to reduce stress, anxiety or depression; to improve self-esteem or confidence; to increase social networks; alleviate symptom of chronic pain or illness; distract from behaviour related health issues, and improve overall wellbeing and health</td> </tr> <tr> <td>What</td> <td>It is a primary care based art intervention where health professionals refer NHS patients for an art programme<br/><br/>- the intervention involves attending art sessions delivered by artists working with activities such as words/poetry, ceramics, drawing, mosaics and painting<br/><br/>- patients who have completed Artlift programmes are encouraged to continue with their art activities</td> </tr> <tr> <td>Who provided</td> <td>Artists</td> </tr> <tr> <td>How</td> <td>Face-to-face</td> </tr> <tr> <td>Where</td> <td>Five diverse locations across Wiltshire, primary care setting</td> </tr> <tr> <td>When and How much</td> <td>8 weeks, sessions once a week for two hours, upon programme completion patients can be re-referred by a healthcare professional to access another eight week course</td> </tr> <tr> <td>Tailoring</td> <td>Personalized</td> </tr> </table> <p>Intervention: Light</p> | Name | Artlift Wiltshire Move on Groups (MoG) | Why | Patients are referred for a range of reasons including: to reduce stress, anxiety or depression; to improve self-esteem or confidence; to increase social networks; alleviate symptom of chronic pain or illness; distract from behaviour related health issues, and improve overall wellbeing and health | What | It is a primary care based art intervention where health professionals refer NHS patients for an art programme<br><br>- the intervention involves attending art sessions delivered by artists working with activities such as words/poetry, ceramics, drawing, mosaics and painting<br><br>- patients who have completed Artlift programmes are encouraged to continue with their art activities | Who provided | Artists | How | Face-to-face | Where | Five diverse locations across Wiltshire, primary care setting | When and How much | 8 weeks, sessions once a week for two hours, upon programme completion patients can be re-referred by a healthcare professional to access another eight week course | Tailoring | Personalized | <p>Patient outcomes at baseline, pre-re-referral, post-re-referral, after intervention and follow-up via questionnaire:</p> <ul style="list-style-type: none"> <li>- Warwick Edinburgh Mental Wellbeing Scale (WEMWBS)</li> </ul> | <p>Peer-Review: no</p> <p>Funding source: -</p> <p>Declaration of interest: not mentioned</p> |
| N                  |                                                                                                                                                                                                                                                                                                                                                                                                  | 15                                                                                                                                                                                                                                                                                                                                                                                                                                                                                                                                                                             |           |   |    |                    |       |       |                   |          |    |           |                 |     |                    |                                                                                                                                                                   |               |                                                              |   |   |       |   |   |                                                                        |                                                                                                                                                                                                                                                                                                                                                                                                                                                                                                                                                                                                                                                                                                                                                                                                                                                                                                                                                                                                                                                                                                                                                                                                                                                                                                                                                                                           |      |                                        |     |                                                                                                                                                                                                                                                                                                           |      |                                                                                                                                                                                                                                                                                                                                                                                                  |              |         |     |              |       |                                                               |                   |                                                                                                                                                                     |           |              |                                                                                                                                                                                                                                   |                                                                                               |
| Age                | Range                                                                                                                                                                                                                                                                                                                                                                                            | 39-84                                                                                                                                                                                                                                                                                                                                                                                                                                                                                                                                                                          |           |   |    |                    |       |       |                   |          |    |           |                 |     |                    |                                                                                                                                                                   |               |                                                              |   |   |       |   |   |                                                                        |                                                                                                                                                                                                                                                                                                                                                                                                                                                                                                                                                                                                                                                                                                                                                                                                                                                                                                                                                                                                                                                                                                                                                                                                                                                                                                                                                                                           |      |                                        |     |                                                                                                                                                                                                                                                                                                           |      |                                                                                                                                                                                                                                                                                                                                                                                                  |              |         |     |              |       |                                                               |                   |                                                                                                                                                                     |           |              |                                                                                                                                                                                                                                   |                                                                                               |
| Gender             | Female %                                                                                                                                                                                                                                                                                                                                                                                         | 80                                                                                                                                                                                                                                                                                                                                                                                                                                                                                                                                                                             |           |   |    |                    |       |       |                   |          |    |           |                 |     |                    |                                                                                                                                                                   |               |                                                              |   |   |       |   |   |                                                                        |                                                                                                                                                                                                                                                                                                                                                                                                                                                                                                                                                                                                                                                                                                                                                                                                                                                                                                                                                                                                                                                                                                                                                                                                                                                                                                                                                                                           |      |                                        |     |                                                                                                                                                                                                                                                                                                           |      |                                                                                                                                                                                                                                                                                                                                                                                                  |              |         |     |              |       |                                                               |                   |                                                                                                                                                                     |           |              |                                                                                                                                                                                                                                   |                                                                                               |
| Ethnicity          | White British %                                                                                                                                                                                                                                                                                                                                                                                  | 100                                                                                                                                                                                                                                                                                                                                                                                                                                                                                                                                                                            |           |   |    |                    |       |       |                   |          |    |           |                 |     |                    |                                                                                                                                                                   |               |                                                              |   |   |       |   |   |                                                                        |                                                                                                                                                                                                                                                                                                                                                                                                                                                                                                                                                                                                                                                                                                                                                                                                                                                                                                                                                                                                                                                                                                                                                                                                                                                                                                                                                                                           |      |                                        |     |                                                                                                                                                                                                                                                                                                           |      |                                                                                                                                                                                                                                                                                                                                                                                                  |              |         |     |              |       |                                                               |                   |                                                                                                                                                                     |           |              |                                                                                                                                                                                                                                   |                                                                                               |
| Living arrangement | -                                                                                                                                                                                                                                                                                                                                                                                                | -                                                                                                                                                                                                                                                                                                                                                                                                                                                                                                                                                                              |           |   |    |                    |       |       |                   |          |    |           |                 |     |                    |                                                                                                                                                                   |               |                                                              |   |   |       |   |   |                                                                        |                                                                                                                                                                                                                                                                                                                                                                                                                                                                                                                                                                                                                                                                                                                                                                                                                                                                                                                                                                                                                                                                                                                                                                                                                                                                                                                                                                                           |      |                                        |     |                                                                                                                                                                                                                                                                                                           |      |                                                                                                                                                                                                                                                                                                                                                                                                  |              |         |     |              |       |                                                               |                   |                                                                                                                                                                     |           |              |                                                                                                                                                                                                                                   |                                                                                               |
| Employment status  | -                                                                                                                                                                                                                                                                                                                                                                                                | -                                                                                                                                                                                                                                                                                                                                                                                                                                                                                                                                                                              |           |   |    |                    |       |       |                   |          |    |           |                 |     |                    |                                                                                                                                                                   |               |                                                              |   |   |       |   |   |                                                                        |                                                                                                                                                                                                                                                                                                                                                                                                                                                                                                                                                                                                                                                                                                                                                                                                                                                                                                                                                                                                                                                                                                                                                                                                                                                                                                                                                                                           |      |                                        |     |                                                                                                                                                                                                                                                                                                           |      |                                                                                                                                                                                                                                                                                                                                                                                                  |              |         |     |              |       |                                                               |                   |                                                                                                                                                                     |           |              |                                                                                                                                                                                                                                   |                                                                                               |
| other              | -                                                                                                                                                                                                                                                                                                                                                                                                | -                                                                                                                                                                                                                                                                                                                                                                                                                                                                                                                                                                              |           |   |    |                    |       |       |                   |          |    |           |                 |     |                    |                                                                                                                                                                   |               |                                                              |   |   |       |   |   |                                                                        |                                                                                                                                                                                                                                                                                                                                                                                                                                                                                                                                                                                                                                                                                                                                                                                                                                                                                                                                                                                                                                                                                                                                                                                                                                                                                                                                                                                           |      |                                        |     |                                                                                                                                                                                                                                                                                                           |      |                                                                                                                                                                                                                                                                                                                                                                                                  |              |         |     |              |       |                                                               |                   |                                                                                                                                                                     |           |              |                                                                                                                                                                                                                                   |                                                                                               |
| Name               | Artlift Wiltshire Move on Groups (MoG)                                                                                                                                                                                                                                                                                                                                                           |                                                                                                                                                                                                                                                                                                                                                                                                                                                                                                                                                                                |           |   |    |                    |       |       |                   |          |    |           |                 |     |                    |                                                                                                                                                                   |               |                                                              |   |   |       |   |   |                                                                        |                                                                                                                                                                                                                                                                                                                                                                                                                                                                                                                                                                                                                                                                                                                                                                                                                                                                                                                                                                                                                                                                                                                                                                                                                                                                                                                                                                                           |      |                                        |     |                                                                                                                                                                                                                                                                                                           |      |                                                                                                                                                                                                                                                                                                                                                                                                  |              |         |     |              |       |                                                               |                   |                                                                                                                                                                     |           |              |                                                                                                                                                                                                                                   |                                                                                               |
| Why                | Patients are referred for a range of reasons including: to reduce stress, anxiety or depression; to improve self-esteem or confidence; to increase social networks; alleviate symptom of chronic pain or illness; distract from behaviour related health issues, and improve overall wellbeing and health                                                                                        |                                                                                                                                                                                                                                                                                                                                                                                                                                                                                                                                                                                |           |   |    |                    |       |       |                   |          |    |           |                 |     |                    |                                                                                                                                                                   |               |                                                              |   |   |       |   |   |                                                                        |                                                                                                                                                                                                                                                                                                                                                                                                                                                                                                                                                                                                                                                                                                                                                                                                                                                                                                                                                                                                                                                                                                                                                                                                                                                                                                                                                                                           |      |                                        |     |                                                                                                                                                                                                                                                                                                           |      |                                                                                                                                                                                                                                                                                                                                                                                                  |              |         |     |              |       |                                                               |                   |                                                                                                                                                                     |           |              |                                                                                                                                                                                                                                   |                                                                                               |
| What               | It is a primary care based art intervention where health professionals refer NHS patients for an art programme<br><br>- the intervention involves attending art sessions delivered by artists working with activities such as words/poetry, ceramics, drawing, mosaics and painting<br><br>- patients who have completed Artlift programmes are encouraged to continue with their art activities |                                                                                                                                                                                                                                                                                                                                                                                                                                                                                                                                                                                |           |   |    |                    |       |       |                   |          |    |           |                 |     |                    |                                                                                                                                                                   |               |                                                              |   |   |       |   |   |                                                                        |                                                                                                                                                                                                                                                                                                                                                                                                                                                                                                                                                                                                                                                                                                                                                                                                                                                                                                                                                                                                                                                                                                                                                                                                                                                                                                                                                                                           |      |                                        |     |                                                                                                                                                                                                                                                                                                           |      |                                                                                                                                                                                                                                                                                                                                                                                                  |              |         |     |              |       |                                                               |                   |                                                                                                                                                                     |           |              |                                                                                                                                                                                                                                   |                                                                                               |
| Who provided       | Artists                                                                                                                                                                                                                                                                                                                                                                                          |                                                                                                                                                                                                                                                                                                                                                                                                                                                                                                                                                                                |           |   |    |                    |       |       |                   |          |    |           |                 |     |                    |                                                                                                                                                                   |               |                                                              |   |   |       |   |   |                                                                        |                                                                                                                                                                                                                                                                                                                                                                                                                                                                                                                                                                                                                                                                                                                                                                                                                                                                                                                                                                                                                                                                                                                                                                                                                                                                                                                                                                                           |      |                                        |     |                                                                                                                                                                                                                                                                                                           |      |                                                                                                                                                                                                                                                                                                                                                                                                  |              |         |     |              |       |                                                               |                   |                                                                                                                                                                     |           |              |                                                                                                                                                                                                                                   |                                                                                               |
| How                | Face-to-face                                                                                                                                                                                                                                                                                                                                                                                     |                                                                                                                                                                                                                                                                                                                                                                                                                                                                                                                                                                                |           |   |    |                    |       |       |                   |          |    |           |                 |     |                    |                                                                                                                                                                   |               |                                                              |   |   |       |   |   |                                                                        |                                                                                                                                                                                                                                                                                                                                                                                                                                                                                                                                                                                                                                                                                                                                                                                                                                                                                                                                                                                                                                                                                                                                                                                                                                                                                                                                                                                           |      |                                        |     |                                                                                                                                                                                                                                                                                                           |      |                                                                                                                                                                                                                                                                                                                                                                                                  |              |         |     |              |       |                                                               |                   |                                                                                                                                                                     |           |              |                                                                                                                                                                                                                                   |                                                                                               |
| Where              | Five diverse locations across Wiltshire, primary care setting                                                                                                                                                                                                                                                                                                                                    |                                                                                                                                                                                                                                                                                                                                                                                                                                                                                                                                                                                |           |   |    |                    |       |       |                   |          |    |           |                 |     |                    |                                                                                                                                                                   |               |                                                              |   |   |       |   |   |                                                                        |                                                                                                                                                                                                                                                                                                                                                                                                                                                                                                                                                                                                                                                                                                                                                                                                                                                                                                                                                                                                                                                                                                                                                                                                                                                                                                                                                                                           |      |                                        |     |                                                                                                                                                                                                                                                                                                           |      |                                                                                                                                                                                                                                                                                                                                                                                                  |              |         |     |              |       |                                                               |                   |                                                                                                                                                                     |           |              |                                                                                                                                                                                                                                   |                                                                                               |
| When and How much  | 8 weeks, sessions once a week for two hours, upon programme completion patients can be re-referred by a healthcare professional to access another eight week course                                                                                                                                                                                                                              |                                                                                                                                                                                                                                                                                                                                                                                                                                                                                                                                                                                |           |   |    |                    |       |       |                   |          |    |           |                 |     |                    |                                                                                                                                                                   |               |                                                              |   |   |       |   |   |                                                                        |                                                                                                                                                                                                                                                                                                                                                                                                                                                                                                                                                                                                                                                                                                                                                                                                                                                                                                                                                                                                                                                                                                                                                                                                                                                                                                                                                                                           |      |                                        |     |                                                                                                                                                                                                                                                                                                           |      |                                                                                                                                                                                                                                                                                                                                                                                                  |              |         |     |              |       |                                                               |                   |                                                                                                                                                                     |           |              |                                                                                                                                                                                                                                   |                                                                                               |
| Tailoring          | Personalized                                                                                                                                                                                                                                                                                                                                                                                     |                                                                                                                                                                                                                                                                                                                                                                                                                                                                                                                                                                                |           |   |    |                    |       |       |                   |          |    |           |                 |     |                    |                                                                                                                                                                   |               |                                                              |   |   |       |   |   |                                                                        |                                                                                                                                                                                                                                                                                                                                                                                                                                                                                                                                                                                                                                                                                                                                                                                                                                                                                                                                                                                                                                                                                                                                                                                                                                                                                                                                                                                           |      |                                        |     |                                                                                                                                                                                                                                                                                                           |      |                                                                                                                                                                                                                                                                                                                                                                                                  |              |         |     |              |       |                                                               |                   |                                                                                                                                                                     |           |              |                                                                                                                                                                                                                                   |                                                                                               |

|                               |                                                                                                                                                                                                                                                                                                                                    |                                                                                                                                                                                                                                                                                                                                                                                                                                                                                                                                                                                                                                                                                                                                                                                           |   |  |     |     |               |      |        |          |      |           |                 |      |                                                                                      |                                                                                                                                                                                                                                                                                                                                                                                                                                                                                                                                                                                                                                                                                                                                                                                                                                                                                                                                                                                                                                                                                                                                                                                                                                                                                                                            |      |                                         |            |                                                                                                                 |       |                                                                                                                                                                                                     |              |                                                                                                                                                             |                                                                                                                                                                                                                                                                                                                                                                                                                                                                                                                                                                                                                                                                                                                                                                                                                                                                                                                                                                                                                                                                                                                                                                                                                                                                                                                                                                                                                                                                                                                                                                                                                                                                                                                                                                                                                                                                                                                                                                                                                                                                                                                                |                                                                                                                                                                                                                                                                                          |                                              |                         |                                                                                                                                   |                                                                                    |                                                                                                                                                                                   |                           |                                                                                                                                                                                                                                                                                                                                                                                                                                                                                                                                                                                                               |                                                                                                                                                                                                                                                                                |                                                                                                                                                                            |  |                                                                                                                                                                            |      |                                                                        |              |                                                                       |     |                                                                                                                                                                               |       |                |                   |                                                                                                                                                                                                                                                                                                                                    |           |              |                                                                                                                                                                                                                                                                                                                                                                                                                                                                                                                                                                                                                                                                                        |                                                                                                                                                                            |
|-------------------------------|------------------------------------------------------------------------------------------------------------------------------------------------------------------------------------------------------------------------------------------------------------------------------------------------------------------------------------|-------------------------------------------------------------------------------------------------------------------------------------------------------------------------------------------------------------------------------------------------------------------------------------------------------------------------------------------------------------------------------------------------------------------------------------------------------------------------------------------------------------------------------------------------------------------------------------------------------------------------------------------------------------------------------------------------------------------------------------------------------------------------------------------|---|--|-----|-----|---------------|------|--------|----------|------|-----------|-----------------|------|--------------------------------------------------------------------------------------|----------------------------------------------------------------------------------------------------------------------------------------------------------------------------------------------------------------------------------------------------------------------------------------------------------------------------------------------------------------------------------------------------------------------------------------------------------------------------------------------------------------------------------------------------------------------------------------------------------------------------------------------------------------------------------------------------------------------------------------------------------------------------------------------------------------------------------------------------------------------------------------------------------------------------------------------------------------------------------------------------------------------------------------------------------------------------------------------------------------------------------------------------------------------------------------------------------------------------------------------------------------------------------------------------------------------------|------|-----------------------------------------|------------|-----------------------------------------------------------------------------------------------------------------|-------|-----------------------------------------------------------------------------------------------------------------------------------------------------------------------------------------------------|--------------|-------------------------------------------------------------------------------------------------------------------------------------------------------------|--------------------------------------------------------------------------------------------------------------------------------------------------------------------------------------------------------------------------------------------------------------------------------------------------------------------------------------------------------------------------------------------------------------------------------------------------------------------------------------------------------------------------------------------------------------------------------------------------------------------------------------------------------------------------------------------------------------------------------------------------------------------------------------------------------------------------------------------------------------------------------------------------------------------------------------------------------------------------------------------------------------------------------------------------------------------------------------------------------------------------------------------------------------------------------------------------------------------------------------------------------------------------------------------------------------------------------------------------------------------------------------------------------------------------------------------------------------------------------------------------------------------------------------------------------------------------------------------------------------------------------------------------------------------------------------------------------------------------------------------------------------------------------------------------------------------------------------------------------------------------------------------------------------------------------------------------------------------------------------------------------------------------------------------------------------------------------------------------------------------------------|------------------------------------------------------------------------------------------------------------------------------------------------------------------------------------------------------------------------------------------------------------------------------------------|----------------------------------------------|-------------------------|-----------------------------------------------------------------------------------------------------------------------------------|------------------------------------------------------------------------------------|-----------------------------------------------------------------------------------------------------------------------------------------------------------------------------------|---------------------------|---------------------------------------------------------------------------------------------------------------------------------------------------------------------------------------------------------------------------------------------------------------------------------------------------------------------------------------------------------------------------------------------------------------------------------------------------------------------------------------------------------------------------------------------------------------------------------------------------------------|--------------------------------------------------------------------------------------------------------------------------------------------------------------------------------------------------------------------------------------------------------------------------------|----------------------------------------------------------------------------------------------------------------------------------------------------------------------------|--|----------------------------------------------------------------------------------------------------------------------------------------------------------------------------|------|------------------------------------------------------------------------|--------------|-----------------------------------------------------------------------|-----|-------------------------------------------------------------------------------------------------------------------------------------------------------------------------------|-------|----------------|-------------------|------------------------------------------------------------------------------------------------------------------------------------------------------------------------------------------------------------------------------------------------------------------------------------------------------------------------------------|-----------|--------------|----------------------------------------------------------------------------------------------------------------------------------------------------------------------------------------------------------------------------------------------------------------------------------------------------------------------------------------------------------------------------------------------------------------------------------------------------------------------------------------------------------------------------------------------------------------------------------------------------------------------------------------------------------------------------------------|----------------------------------------------------------------------------------------------------------------------------------------------------------------------------|
| <p>Bertotti 2017 (17)</p>     | <p>Uncontrolled before-and-after study, mixed-methods</p> <p>Study length: 11 months</p>                                                                                                                                                                                                                                           | <p><b>Inclusion criteria:</b></p> <p>- patients with a wide range of health and non-health issues including social and economic concerns</p> <p><b>Exclusion criteria:-</b></p> <p>Baseline characteristics:</p> <table border="1" data-bbox="477 470 1071 869"> <tr> <td>N</td> <td></td> <td>100</td> </tr> <tr> <td>Age</td> <td>Group 45-64 %</td> <td>44</td> </tr> <tr> <td>Gender</td> <td>Female %</td> <td>63</td> </tr> <tr> <td>Ethnicity</td> <td>White %</td> <td>44</td> </tr> <tr> <td>Living arrangements</td> <td>With others %</td> <td>59</td> </tr> <tr> <td>Employment status n=100</td> <td>Employed %</td> <td>14</td> </tr> <tr> <td>other</td> <td>Age left full time education: age 17 and upwards %</td> <td>49</td> </tr> </table> <p>Population: General</p> | N |  | 100 | Age | Group 45-64 % | 44   | Gender | Female % | 63   | Ethnicity | White %         | 44   | Living arrangements                                                                  | With others %                                                                                                                                                                                                                                                                                                                                                                                                                                                                                                                                                                                                                                                                                                                                                                                                                                                                                                                                                                                                                                                                                                                                                                                                                                                                                                              | 59   | Employment status n=100                 | Employed % | 14                                                                                                              | other | Age left full time education: age 17 and upwards %                                                                                                                                                  | 49           | <p>Primary Care, Secondary care</p> <p>Country: UK (London Borough of Waltham Forest, Greater London)</p>                                                   | <table border="1" data-bbox="1308 228 2228 1157"> <tr> <td>Name</td> <td>Social Prescribing Service in Waltham Forest</td> </tr> <tr> <td>Why</td> <td>Facilitate access to a range of support services that will enable individuals to significantly improve their health and wellbeing</td> </tr> <tr> <td></td> <td>- increase the role of the CVS (Community and voluntary Sector) in the provision of services and evaluate aspects of the service model prior to wider adoption across the borough</td> </tr> <tr> <td></td> <td>- release specialist capacity across the system, so that individuals with the most intense health and social care needs can receive the care they require despite funding constraints</td> </tr> <tr> <td></td> <td>- increase 'whole system' efficiency by preventing deterioration in the service user's condition and by reducing duplication of care between organisations and professions</td> </tr> <tr> <td></td> <td>- provide 'seamless' care by placing the service user at the centre of decision-making and designing packages of interventions around their needs irrespective of provider</td> </tr> <tr> <td>What</td> <td>Social Prescribing Service: part of the Better Care Together Programme</td> </tr> <tr> <td>Who provided</td> <td>Two social prescribers based at Waltham Forest Borough Council (WFBC)</td> </tr> <tr> <td>How</td> <td>Social prescriber contact patients over the phone, discussing their needs and aspirations and recommending arange of solutions available in the statutory or community sector</td> </tr> <tr> <td>Where</td> <td>Telephone only</td> </tr> <tr> <td>When and How Much</td> <td>Three phone calls to each patient: first phone call to understand clients' needs and aspirations, second phone call to enable social prescribers to recommend a package of support from statutory or community organisations and a third phone call after eight weeks to assess the patient progress in accessing support services</td> </tr> <tr> <td>Tailoring</td> <td>Personalized</td> </tr> </table> <p>Intervention: Medium</p> | Name                                                                                                                                                                                                                                                                                     | Social Prescribing Service in Waltham Forest | Why                     | Facilitate access to a range of support services that will enable individuals to significantly improve their health and wellbeing |                                                                                    | - increase the role of the CVS (Community and voluntary Sector) in the provision of services and evaluate aspects of the service model prior to wider adoption across the borough |                           | - release specialist capacity across the system, so that individuals with the most intense health and social care needs can receive the care they require despite funding constraints                                                                                                                                                                                                                                                                                                                                                                                                                         |                                                                                                                                                                                                                                                                                | - increase 'whole system' efficiency by preventing deterioration in the service user's condition and by reducing duplication of care between organisations and professions |  | - provide 'seamless' care by placing the service user at the centre of decision-making and designing packages of interventions around their needs irrespective of provider | What | Social Prescribing Service: part of the Better Care Together Programme | Who provided | Two social prescribers based at Waltham Forest Borough Council (WFBC) | How | Social prescriber contact patients over the phone, discussing their needs and aspirations and recommending arange of solutions available in the statutory or community sector | Where | Telephone only | When and How Much | Three phone calls to each patient: first phone call to understand clients' needs and aspirations, second phone call to enable social prescribers to recommend a package of support from statutory or community organisations and a third phone call after eight weeks to assess the patient progress in accessing support services | Tailoring | Personalized | <p>Patient outcomes at baseline (pre-intervention) and 4-months follow-up via telephone survey:</p> <ul style="list-style-type: none"> <li>- General health (Likert scale 1-5)</li> <li>- Well-being (Likert scale 0-6)</li> <li>- EQ-5D-3L</li> <li>- Warwick Edinburgh Mental Wellbeing Scale (WEMWBS)</li> <li>- Patient Activation Measure (PAM)</li> <li>- volunteering*</li> <li>- employment*</li> </ul> <p>Process of care measures at baseline and 4-months follow-up via monitoring data:</p> <ul style="list-style-type: none"> <li>- GP visits</li> <li>- A&amp;E visits</li> </ul> <p>Economic evaluation:</p> <ul style="list-style-type: none"> <li>- - SROI</li> </ul> | <p>Peer-Review: no</p> <p>Funding source: Waltham Forest Borough Council and Waltham Forest Clinical Commissioning Group</p> <p>Declaration of interest: Not mentioned</p> |
| N                             |                                                                                                                                                                                                                                                                                                                                    | 100                                                                                                                                                                                                                                                                                                                                                                                                                                                                                                                                                                                                                                                                                                                                                                                       |   |  |     |     |               |      |        |          |      |           |                 |      |                                                                                      |                                                                                                                                                                                                                                                                                                                                                                                                                                                                                                                                                                                                                                                                                                                                                                                                                                                                                                                                                                                                                                                                                                                                                                                                                                                                                                                            |      |                                         |            |                                                                                                                 |       |                                                                                                                                                                                                     |              |                                                                                                                                                             |                                                                                                                                                                                                                                                                                                                                                                                                                                                                                                                                                                                                                                                                                                                                                                                                                                                                                                                                                                                                                                                                                                                                                                                                                                                                                                                                                                                                                                                                                                                                                                                                                                                                                                                                                                                                                                                                                                                                                                                                                                                                                                                                |                                                                                                                                                                                                                                                                                          |                                              |                         |                                                                                                                                   |                                                                                    |                                                                                                                                                                                   |                           |                                                                                                                                                                                                                                                                                                                                                                                                                                                                                                                                                                                                               |                                                                                                                                                                                                                                                                                |                                                                                                                                                                            |  |                                                                                                                                                                            |      |                                                                        |              |                                                                       |     |                                                                                                                                                                               |       |                |                   |                                                                                                                                                                                                                                                                                                                                    |           |              |                                                                                                                                                                                                                                                                                                                                                                                                                                                                                                                                                                                                                                                                                        |                                                                                                                                                                            |
| Age                           | Group 45-64 %                                                                                                                                                                                                                                                                                                                      | 44                                                                                                                                                                                                                                                                                                                                                                                                                                                                                                                                                                                                                                                                                                                                                                                        |   |  |     |     |               |      |        |          |      |           |                 |      |                                                                                      |                                                                                                                                                                                                                                                                                                                                                                                                                                                                                                                                                                                                                                                                                                                                                                                                                                                                                                                                                                                                                                                                                                                                                                                                                                                                                                                            |      |                                         |            |                                                                                                                 |       |                                                                                                                                                                                                     |              |                                                                                                                                                             |                                                                                                                                                                                                                                                                                                                                                                                                                                                                                                                                                                                                                                                                                                                                                                                                                                                                                                                                                                                                                                                                                                                                                                                                                                                                                                                                                                                                                                                                                                                                                                                                                                                                                                                                                                                                                                                                                                                                                                                                                                                                                                                                |                                                                                                                                                                                                                                                                                          |                                              |                         |                                                                                                                                   |                                                                                    |                                                                                                                                                                                   |                           |                                                                                                                                                                                                                                                                                                                                                                                                                                                                                                                                                                                                               |                                                                                                                                                                                                                                                                                |                                                                                                                                                                            |  |                                                                                                                                                                            |      |                                                                        |              |                                                                       |     |                                                                                                                                                                               |       |                |                   |                                                                                                                                                                                                                                                                                                                                    |           |              |                                                                                                                                                                                                                                                                                                                                                                                                                                                                                                                                                                                                                                                                                        |                                                                                                                                                                            |
| Gender                        | Female %                                                                                                                                                                                                                                                                                                                           | 63                                                                                                                                                                                                                                                                                                                                                                                                                                                                                                                                                                                                                                                                                                                                                                                        |   |  |     |     |               |      |        |          |      |           |                 |      |                                                                                      |                                                                                                                                                                                                                                                                                                                                                                                                                                                                                                                                                                                                                                                                                                                                                                                                                                                                                                                                                                                                                                                                                                                                                                                                                                                                                                                            |      |                                         |            |                                                                                                                 |       |                                                                                                                                                                                                     |              |                                                                                                                                                             |                                                                                                                                                                                                                                                                                                                                                                                                                                                                                                                                                                                                                                                                                                                                                                                                                                                                                                                                                                                                                                                                                                                                                                                                                                                                                                                                                                                                                                                                                                                                                                                                                                                                                                                                                                                                                                                                                                                                                                                                                                                                                                                                |                                                                                                                                                                                                                                                                                          |                                              |                         |                                                                                                                                   |                                                                                    |                                                                                                                                                                                   |                           |                                                                                                                                                                                                                                                                                                                                                                                                                                                                                                                                                                                                               |                                                                                                                                                                                                                                                                                |                                                                                                                                                                            |  |                                                                                                                                                                            |      |                                                                        |              |                                                                       |     |                                                                                                                                                                               |       |                |                   |                                                                                                                                                                                                                                                                                                                                    |           |              |                                                                                                                                                                                                                                                                                                                                                                                                                                                                                                                                                                                                                                                                                        |                                                                                                                                                                            |
| Ethnicity                     | White %                                                                                                                                                                                                                                                                                                                            | 44                                                                                                                                                                                                                                                                                                                                                                                                                                                                                                                                                                                                                                                                                                                                                                                        |   |  |     |     |               |      |        |          |      |           |                 |      |                                                                                      |                                                                                                                                                                                                                                                                                                                                                                                                                                                                                                                                                                                                                                                                                                                                                                                                                                                                                                                                                                                                                                                                                                                                                                                                                                                                                                                            |      |                                         |            |                                                                                                                 |       |                                                                                                                                                                                                     |              |                                                                                                                                                             |                                                                                                                                                                                                                                                                                                                                                                                                                                                                                                                                                                                                                                                                                                                                                                                                                                                                                                                                                                                                                                                                                                                                                                                                                                                                                                                                                                                                                                                                                                                                                                                                                                                                                                                                                                                                                                                                                                                                                                                                                                                                                                                                |                                                                                                                                                                                                                                                                                          |                                              |                         |                                                                                                                                   |                                                                                    |                                                                                                                                                                                   |                           |                                                                                                                                                                                                                                                                                                                                                                                                                                                                                                                                                                                                               |                                                                                                                                                                                                                                                                                |                                                                                                                                                                            |  |                                                                                                                                                                            |      |                                                                        |              |                                                                       |     |                                                                                                                                                                               |       |                |                   |                                                                                                                                                                                                                                                                                                                                    |           |              |                                                                                                                                                                                                                                                                                                                                                                                                                                                                                                                                                                                                                                                                                        |                                                                                                                                                                            |
| Living arrangements           | With others %                                                                                                                                                                                                                                                                                                                      | 59                                                                                                                                                                                                                                                                                                                                                                                                                                                                                                                                                                                                                                                                                                                                                                                        |   |  |     |     |               |      |        |          |      |           |                 |      |                                                                                      |                                                                                                                                                                                                                                                                                                                                                                                                                                                                                                                                                                                                                                                                                                                                                                                                                                                                                                                                                                                                                                                                                                                                                                                                                                                                                                                            |      |                                         |            |                                                                                                                 |       |                                                                                                                                                                                                     |              |                                                                                                                                                             |                                                                                                                                                                                                                                                                                                                                                                                                                                                                                                                                                                                                                                                                                                                                                                                                                                                                                                                                                                                                                                                                                                                                                                                                                                                                                                                                                                                                                                                                                                                                                                                                                                                                                                                                                                                                                                                                                                                                                                                                                                                                                                                                |                                                                                                                                                                                                                                                                                          |                                              |                         |                                                                                                                                   |                                                                                    |                                                                                                                                                                                   |                           |                                                                                                                                                                                                                                                                                                                                                                                                                                                                                                                                                                                                               |                                                                                                                                                                                                                                                                                |                                                                                                                                                                            |  |                                                                                                                                                                            |      |                                                                        |              |                                                                       |     |                                                                                                                                                                               |       |                |                   |                                                                                                                                                                                                                                                                                                                                    |           |              |                                                                                                                                                                                                                                                                                                                                                                                                                                                                                                                                                                                                                                                                                        |                                                                                                                                                                            |
| Employment status n=100       | Employed %                                                                                                                                                                                                                                                                                                                         | 14                                                                                                                                                                                                                                                                                                                                                                                                                                                                                                                                                                                                                                                                                                                                                                                        |   |  |     |     |               |      |        |          |      |           |                 |      |                                                                                      |                                                                                                                                                                                                                                                                                                                                                                                                                                                                                                                                                                                                                                                                                                                                                                                                                                                                                                                                                                                                                                                                                                                                                                                                                                                                                                                            |      |                                         |            |                                                                                                                 |       |                                                                                                                                                                                                     |              |                                                                                                                                                             |                                                                                                                                                                                                                                                                                                                                                                                                                                                                                                                                                                                                                                                                                                                                                                                                                                                                                                                                                                                                                                                                                                                                                                                                                                                                                                                                                                                                                                                                                                                                                                                                                                                                                                                                                                                                                                                                                                                                                                                                                                                                                                                                |                                                                                                                                                                                                                                                                                          |                                              |                         |                                                                                                                                   |                                                                                    |                                                                                                                                                                                   |                           |                                                                                                                                                                                                                                                                                                                                                                                                                                                                                                                                                                                                               |                                                                                                                                                                                                                                                                                |                                                                                                                                                                            |  |                                                                                                                                                                            |      |                                                                        |              |                                                                       |     |                                                                                                                                                                               |       |                |                   |                                                                                                                                                                                                                                                                                                                                    |           |              |                                                                                                                                                                                                                                                                                                                                                                                                                                                                                                                                                                                                                                                                                        |                                                                                                                                                                            |
| other                         | Age left full time education: age 17 and upwards %                                                                                                                                                                                                                                                                                 | 49                                                                                                                                                                                                                                                                                                                                                                                                                                                                                                                                                                                                                                                                                                                                                                                        |   |  |     |     |               |      |        |          |      |           |                 |      |                                                                                      |                                                                                                                                                                                                                                                                                                                                                                                                                                                                                                                                                                                                                                                                                                                                                                                                                                                                                                                                                                                                                                                                                                                                                                                                                                                                                                                            |      |                                         |            |                                                                                                                 |       |                                                                                                                                                                                                     |              |                                                                                                                                                             |                                                                                                                                                                                                                                                                                                                                                                                                                                                                                                                                                                                                                                                                                                                                                                                                                                                                                                                                                                                                                                                                                                                                                                                                                                                                                                                                                                                                                                                                                                                                                                                                                                                                                                                                                                                                                                                                                                                                                                                                                                                                                                                                |                                                                                                                                                                                                                                                                                          |                                              |                         |                                                                                                                                   |                                                                                    |                                                                                                                                                                                   |                           |                                                                                                                                                                                                                                                                                                                                                                                                                                                                                                                                                                                                               |                                                                                                                                                                                                                                                                                |                                                                                                                                                                            |  |                                                                                                                                                                            |      |                                                                        |              |                                                                       |     |                                                                                                                                                                               |       |                |                   |                                                                                                                                                                                                                                                                                                                                    |           |              |                                                                                                                                                                                                                                                                                                                                                                                                                                                                                                                                                                                                                                                                                        |                                                                                                                                                                            |
| Name                          | Social Prescribing Service in Waltham Forest                                                                                                                                                                                                                                                                                       |                                                                                                                                                                                                                                                                                                                                                                                                                                                                                                                                                                                                                                                                                                                                                                                           |   |  |     |     |               |      |        |          |      |           |                 |      |                                                                                      |                                                                                                                                                                                                                                                                                                                                                                                                                                                                                                                                                                                                                                                                                                                                                                                                                                                                                                                                                                                                                                                                                                                                                                                                                                                                                                                            |      |                                         |            |                                                                                                                 |       |                                                                                                                                                                                                     |              |                                                                                                                                                             |                                                                                                                                                                                                                                                                                                                                                                                                                                                                                                                                                                                                                                                                                                                                                                                                                                                                                                                                                                                                                                                                                                                                                                                                                                                                                                                                                                                                                                                                                                                                                                                                                                                                                                                                                                                                                                                                                                                                                                                                                                                                                                                                |                                                                                                                                                                                                                                                                                          |                                              |                         |                                                                                                                                   |                                                                                    |                                                                                                                                                                                   |                           |                                                                                                                                                                                                                                                                                                                                                                                                                                                                                                                                                                                                               |                                                                                                                                                                                                                                                                                |                                                                                                                                                                            |  |                                                                                                                                                                            |      |                                                                        |              |                                                                       |     |                                                                                                                                                                               |       |                |                   |                                                                                                                                                                                                                                                                                                                                    |           |              |                                                                                                                                                                                                                                                                                                                                                                                                                                                                                                                                                                                                                                                                                        |                                                                                                                                                                            |
| Why                           | Facilitate access to a range of support services that will enable individuals to significantly improve their health and wellbeing                                                                                                                                                                                                  |                                                                                                                                                                                                                                                                                                                                                                                                                                                                                                                                                                                                                                                                                                                                                                                           |   |  |     |     |               |      |        |          |      |           |                 |      |                                                                                      |                                                                                                                                                                                                                                                                                                                                                                                                                                                                                                                                                                                                                                                                                                                                                                                                                                                                                                                                                                                                                                                                                                                                                                                                                                                                                                                            |      |                                         |            |                                                                                                                 |       |                                                                                                                                                                                                     |              |                                                                                                                                                             |                                                                                                                                                                                                                                                                                                                                                                                                                                                                                                                                                                                                                                                                                                                                                                                                                                                                                                                                                                                                                                                                                                                                                                                                                                                                                                                                                                                                                                                                                                                                                                                                                                                                                                                                                                                                                                                                                                                                                                                                                                                                                                                                |                                                                                                                                                                                                                                                                                          |                                              |                         |                                                                                                                                   |                                                                                    |                                                                                                                                                                                   |                           |                                                                                                                                                                                                                                                                                                                                                                                                                                                                                                                                                                                                               |                                                                                                                                                                                                                                                                                |                                                                                                                                                                            |  |                                                                                                                                                                            |      |                                                                        |              |                                                                       |     |                                                                                                                                                                               |       |                |                   |                                                                                                                                                                                                                                                                                                                                    |           |              |                                                                                                                                                                                                                                                                                                                                                                                                                                                                                                                                                                                                                                                                                        |                                                                                                                                                                            |
|                               | - increase the role of the CVS (Community and voluntary Sector) in the provision of services and evaluate aspects of the service model prior to wider adoption across the borough                                                                                                                                                  |                                                                                                                                                                                                                                                                                                                                                                                                                                                                                                                                                                                                                                                                                                                                                                                           |   |  |     |     |               |      |        |          |      |           |                 |      |                                                                                      |                                                                                                                                                                                                                                                                                                                                                                                                                                                                                                                                                                                                                                                                                                                                                                                                                                                                                                                                                                                                                                                                                                                                                                                                                                                                                                                            |      |                                         |            |                                                                                                                 |       |                                                                                                                                                                                                     |              |                                                                                                                                                             |                                                                                                                                                                                                                                                                                                                                                                                                                                                                                                                                                                                                                                                                                                                                                                                                                                                                                                                                                                                                                                                                                                                                                                                                                                                                                                                                                                                                                                                                                                                                                                                                                                                                                                                                                                                                                                                                                                                                                                                                                                                                                                                                |                                                                                                                                                                                                                                                                                          |                                              |                         |                                                                                                                                   |                                                                                    |                                                                                                                                                                                   |                           |                                                                                                                                                                                                                                                                                                                                                                                                                                                                                                                                                                                                               |                                                                                                                                                                                                                                                                                |                                                                                                                                                                            |  |                                                                                                                                                                            |      |                                                                        |              |                                                                       |     |                                                                                                                                                                               |       |                |                   |                                                                                                                                                                                                                                                                                                                                    |           |              |                                                                                                                                                                                                                                                                                                                                                                                                                                                                                                                                                                                                                                                                                        |                                                                                                                                                                            |
|                               | - release specialist capacity across the system, so that individuals with the most intense health and social care needs can receive the care they require despite funding constraints                                                                                                                                              |                                                                                                                                                                                                                                                                                                                                                                                                                                                                                                                                                                                                                                                                                                                                                                                           |   |  |     |     |               |      |        |          |      |           |                 |      |                                                                                      |                                                                                                                                                                                                                                                                                                                                                                                                                                                                                                                                                                                                                                                                                                                                                                                                                                                                                                                                                                                                                                                                                                                                                                                                                                                                                                                            |      |                                         |            |                                                                                                                 |       |                                                                                                                                                                                                     |              |                                                                                                                                                             |                                                                                                                                                                                                                                                                                                                                                                                                                                                                                                                                                                                                                                                                                                                                                                                                                                                                                                                                                                                                                                                                                                                                                                                                                                                                                                                                                                                                                                                                                                                                                                                                                                                                                                                                                                                                                                                                                                                                                                                                                                                                                                                                |                                                                                                                                                                                                                                                                                          |                                              |                         |                                                                                                                                   |                                                                                    |                                                                                                                                                                                   |                           |                                                                                                                                                                                                                                                                                                                                                                                                                                                                                                                                                                                                               |                                                                                                                                                                                                                                                                                |                                                                                                                                                                            |  |                                                                                                                                                                            |      |                                                                        |              |                                                                       |     |                                                                                                                                                                               |       |                |                   |                                                                                                                                                                                                                                                                                                                                    |           |              |                                                                                                                                                                                                                                                                                                                                                                                                                                                                                                                                                                                                                                                                                        |                                                                                                                                                                            |
|                               | - increase 'whole system' efficiency by preventing deterioration in the service user's condition and by reducing duplication of care between organisations and professions                                                                                                                                                         |                                                                                                                                                                                                                                                                                                                                                                                                                                                                                                                                                                                                                                                                                                                                                                                           |   |  |     |     |               |      |        |          |      |           |                 |      |                                                                                      |                                                                                                                                                                                                                                                                                                                                                                                                                                                                                                                                                                                                                                                                                                                                                                                                                                                                                                                                                                                                                                                                                                                                                                                                                                                                                                                            |      |                                         |            |                                                                                                                 |       |                                                                                                                                                                                                     |              |                                                                                                                                                             |                                                                                                                                                                                                                                                                                                                                                                                                                                                                                                                                                                                                                                                                                                                                                                                                                                                                                                                                                                                                                                                                                                                                                                                                                                                                                                                                                                                                                                                                                                                                                                                                                                                                                                                                                                                                                                                                                                                                                                                                                                                                                                                                |                                                                                                                                                                                                                                                                                          |                                              |                         |                                                                                                                                   |                                                                                    |                                                                                                                                                                                   |                           |                                                                                                                                                                                                                                                                                                                                                                                                                                                                                                                                                                                                               |                                                                                                                                                                                                                                                                                |                                                                                                                                                                            |  |                                                                                                                                                                            |      |                                                                        |              |                                                                       |     |                                                                                                                                                                               |       |                |                   |                                                                                                                                                                                                                                                                                                                                    |           |              |                                                                                                                                                                                                                                                                                                                                                                                                                                                                                                                                                                                                                                                                                        |                                                                                                                                                                            |
|                               | - provide 'seamless' care by placing the service user at the centre of decision-making and designing packages of interventions around their needs irrespective of provider                                                                                                                                                         |                                                                                                                                                                                                                                                                                                                                                                                                                                                                                                                                                                                                                                                                                                                                                                                           |   |  |     |     |               |      |        |          |      |           |                 |      |                                                                                      |                                                                                                                                                                                                                                                                                                                                                                                                                                                                                                                                                                                                                                                                                                                                                                                                                                                                                                                                                                                                                                                                                                                                                                                                                                                                                                                            |      |                                         |            |                                                                                                                 |       |                                                                                                                                                                                                     |              |                                                                                                                                                             |                                                                                                                                                                                                                                                                                                                                                                                                                                                                                                                                                                                                                                                                                                                                                                                                                                                                                                                                                                                                                                                                                                                                                                                                                                                                                                                                                                                                                                                                                                                                                                                                                                                                                                                                                                                                                                                                                                                                                                                                                                                                                                                                |                                                                                                                                                                                                                                                                                          |                                              |                         |                                                                                                                                   |                                                                                    |                                                                                                                                                                                   |                           |                                                                                                                                                                                                                                                                                                                                                                                                                                                                                                                                                                                                               |                                                                                                                                                                                                                                                                                |                                                                                                                                                                            |  |                                                                                                                                                                            |      |                                                                        |              |                                                                       |     |                                                                                                                                                                               |       |                |                   |                                                                                                                                                                                                                                                                                                                                    |           |              |                                                                                                                                                                                                                                                                                                                                                                                                                                                                                                                                                                                                                                                                                        |                                                                                                                                                                            |
| What                          | Social Prescribing Service: part of the Better Care Together Programme                                                                                                                                                                                                                                                             |                                                                                                                                                                                                                                                                                                                                                                                                                                                                                                                                                                                                                                                                                                                                                                                           |   |  |     |     |               |      |        |          |      |           |                 |      |                                                                                      |                                                                                                                                                                                                                                                                                                                                                                                                                                                                                                                                                                                                                                                                                                                                                                                                                                                                                                                                                                                                                                                                                                                                                                                                                                                                                                                            |      |                                         |            |                                                                                                                 |       |                                                                                                                                                                                                     |              |                                                                                                                                                             |                                                                                                                                                                                                                                                                                                                                                                                                                                                                                                                                                                                                                                                                                                                                                                                                                                                                                                                                                                                                                                                                                                                                                                                                                                                                                                                                                                                                                                                                                                                                                                                                                                                                                                                                                                                                                                                                                                                                                                                                                                                                                                                                |                                                                                                                                                                                                                                                                                          |                                              |                         |                                                                                                                                   |                                                                                    |                                                                                                                                                                                   |                           |                                                                                                                                                                                                                                                                                                                                                                                                                                                                                                                                                                                                               |                                                                                                                                                                                                                                                                                |                                                                                                                                                                            |  |                                                                                                                                                                            |      |                                                                        |              |                                                                       |     |                                                                                                                                                                               |       |                |                   |                                                                                                                                                                                                                                                                                                                                    |           |              |                                                                                                                                                                                                                                                                                                                                                                                                                                                                                                                                                                                                                                                                                        |                                                                                                                                                                            |
| Who provided                  | Two social prescribers based at Waltham Forest Borough Council (WFBC)                                                                                                                                                                                                                                                              |                                                                                                                                                                                                                                                                                                                                                                                                                                                                                                                                                                                                                                                                                                                                                                                           |   |  |     |     |               |      |        |          |      |           |                 |      |                                                                                      |                                                                                                                                                                                                                                                                                                                                                                                                                                                                                                                                                                                                                                                                                                                                                                                                                                                                                                                                                                                                                                                                                                                                                                                                                                                                                                                            |      |                                         |            |                                                                                                                 |       |                                                                                                                                                                                                     |              |                                                                                                                                                             |                                                                                                                                                                                                                                                                                                                                                                                                                                                                                                                                                                                                                                                                                                                                                                                                                                                                                                                                                                                                                                                                                                                                                                                                                                                                                                                                                                                                                                                                                                                                                                                                                                                                                                                                                                                                                                                                                                                                                                                                                                                                                                                                |                                                                                                                                                                                                                                                                                          |                                              |                         |                                                                                                                                   |                                                                                    |                                                                                                                                                                                   |                           |                                                                                                                                                                                                                                                                                                                                                                                                                                                                                                                                                                                                               |                                                                                                                                                                                                                                                                                |                                                                                                                                                                            |  |                                                                                                                                                                            |      |                                                                        |              |                                                                       |     |                                                                                                                                                                               |       |                |                   |                                                                                                                                                                                                                                                                                                                                    |           |              |                                                                                                                                                                                                                                                                                                                                                                                                                                                                                                                                                                                                                                                                                        |                                                                                                                                                                            |
| How                           | Social prescriber contact patients over the phone, discussing their needs and aspirations and recommending arange of solutions available in the statutory or community sector                                                                                                                                                      |                                                                                                                                                                                                                                                                                                                                                                                                                                                                                                                                                                                                                                                                                                                                                                                           |   |  |     |     |               |      |        |          |      |           |                 |      |                                                                                      |                                                                                                                                                                                                                                                                                                                                                                                                                                                                                                                                                                                                                                                                                                                                                                                                                                                                                                                                                                                                                                                                                                                                                                                                                                                                                                                            |      |                                         |            |                                                                                                                 |       |                                                                                                                                                                                                     |              |                                                                                                                                                             |                                                                                                                                                                                                                                                                                                                                                                                                                                                                                                                                                                                                                                                                                                                                                                                                                                                                                                                                                                                                                                                                                                                                                                                                                                                                                                                                                                                                                                                                                                                                                                                                                                                                                                                                                                                                                                                                                                                                                                                                                                                                                                                                |                                                                                                                                                                                                                                                                                          |                                              |                         |                                                                                                                                   |                                                                                    |                                                                                                                                                                                   |                           |                                                                                                                                                                                                                                                                                                                                                                                                                                                                                                                                                                                                               |                                                                                                                                                                                                                                                                                |                                                                                                                                                                            |  |                                                                                                                                                                            |      |                                                                        |              |                                                                       |     |                                                                                                                                                                               |       |                |                   |                                                                                                                                                                                                                                                                                                                                    |           |              |                                                                                                                                                                                                                                                                                                                                                                                                                                                                                                                                                                                                                                                                                        |                                                                                                                                                                            |
| Where                         | Telephone only                                                                                                                                                                                                                                                                                                                     |                                                                                                                                                                                                                                                                                                                                                                                                                                                                                                                                                                                                                                                                                                                                                                                           |   |  |     |     |               |      |        |          |      |           |                 |      |                                                                                      |                                                                                                                                                                                                                                                                                                                                                                                                                                                                                                                                                                                                                                                                                                                                                                                                                                                                                                                                                                                                                                                                                                                                                                                                                                                                                                                            |      |                                         |            |                                                                                                                 |       |                                                                                                                                                                                                     |              |                                                                                                                                                             |                                                                                                                                                                                                                                                                                                                                                                                                                                                                                                                                                                                                                                                                                                                                                                                                                                                                                                                                                                                                                                                                                                                                                                                                                                                                                                                                                                                                                                                                                                                                                                                                                                                                                                                                                                                                                                                                                                                                                                                                                                                                                                                                |                                                                                                                                                                                                                                                                                          |                                              |                         |                                                                                                                                   |                                                                                    |                                                                                                                                                                                   |                           |                                                                                                                                                                                                                                                                                                                                                                                                                                                                                                                                                                                                               |                                                                                                                                                                                                                                                                                |                                                                                                                                                                            |  |                                                                                                                                                                            |      |                                                                        |              |                                                                       |     |                                                                                                                                                                               |       |                |                   |                                                                                                                                                                                                                                                                                                                                    |           |              |                                                                                                                                                                                                                                                                                                                                                                                                                                                                                                                                                                                                                                                                                        |                                                                                                                                                                            |
| When and How Much             | Three phone calls to each patient: first phone call to understand clients' needs and aspirations, second phone call to enable social prescribers to recommend a package of support from statutory or community organisations and a third phone call after eight weeks to assess the patient progress in accessing support services |                                                                                                                                                                                                                                                                                                                                                                                                                                                                                                                                                                                                                                                                                                                                                                                           |   |  |     |     |               |      |        |          |      |           |                 |      |                                                                                      |                                                                                                                                                                                                                                                                                                                                                                                                                                                                                                                                                                                                                                                                                                                                                                                                                                                                                                                                                                                                                                                                                                                                                                                                                                                                                                                            |      |                                         |            |                                                                                                                 |       |                                                                                                                                                                                                     |              |                                                                                                                                                             |                                                                                                                                                                                                                                                                                                                                                                                                                                                                                                                                                                                                                                                                                                                                                                                                                                                                                                                                                                                                                                                                                                                                                                                                                                                                                                                                                                                                                                                                                                                                                                                                                                                                                                                                                                                                                                                                                                                                                                                                                                                                                                                                |                                                                                                                                                                                                                                                                                          |                                              |                         |                                                                                                                                   |                                                                                    |                                                                                                                                                                                   |                           |                                                                                                                                                                                                                                                                                                                                                                                                                                                                                                                                                                                                               |                                                                                                                                                                                                                                                                                |                                                                                                                                                                            |  |                                                                                                                                                                            |      |                                                                        |              |                                                                       |     |                                                                                                                                                                               |       |                |                   |                                                                                                                                                                                                                                                                                                                                    |           |              |                                                                                                                                                                                                                                                                                                                                                                                                                                                                                                                                                                                                                                                                                        |                                                                                                                                                                            |
| Tailoring                     | Personalized                                                                                                                                                                                                                                                                                                                       |                                                                                                                                                                                                                                                                                                                                                                                                                                                                                                                                                                                                                                                                                                                                                                                           |   |  |     |     |               |      |        |          |      |           |                 |      |                                                                                      |                                                                                                                                                                                                                                                                                                                                                                                                                                                                                                                                                                                                                                                                                                                                                                                                                                                                                                                                                                                                                                                                                                                                                                                                                                                                                                                            |      |                                         |            |                                                                                                                 |       |                                                                                                                                                                                                     |              |                                                                                                                                                             |                                                                                                                                                                                                                                                                                                                                                                                                                                                                                                                                                                                                                                                                                                                                                                                                                                                                                                                                                                                                                                                                                                                                                                                                                                                                                                                                                                                                                                                                                                                                                                                                                                                                                                                                                                                                                                                                                                                                                                                                                                                                                                                                |                                                                                                                                                                                                                                                                                          |                                              |                         |                                                                                                                                   |                                                                                    |                                                                                                                                                                                   |                           |                                                                                                                                                                                                                                                                                                                                                                                                                                                                                                                                                                                                               |                                                                                                                                                                                                                                                                                |                                                                                                                                                                            |  |                                                                                                                                                                            |      |                                                                        |              |                                                                       |     |                                                                                                                                                                               |       |                |                   |                                                                                                                                                                                                                                                                                                                                    |           |              |                                                                                                                                                                                                                                                                                                                                                                                                                                                                                                                                                                                                                                                                                        |                                                                                                                                                                            |
| <p>Bertotti 2020 (a) (43)</p> | <p>Uncontrolled before-and-after study, mixed-methods</p> <p>Study length: 21 months</p>                                                                                                                                                                                                                                           | <p><b>Inclusion criteria:</b></p> <p>Patients over 18 years presenting with one of the following referral criteria:</p> <ul style="list-style-type: none"> <li>• Type-2 Diabetes</li> <li>• Low level mental health</li> <li>• Social Isolation</li> <li>• Carers</li> </ul> <p><b>Exclusion criteria:-</b></p> <p>Baseline characteristics:</p> <table border="1" data-bbox="477 1719 1071 1908"> <tr> <td>N</td> <td></td> <td>182</td> </tr> <tr> <td>Age</td> <td>&lt; 65 years %</td> <td>51.3</td> </tr> <tr> <td>Gender</td> <td>Female %</td> <td>67.4</td> </tr> <tr> <td>Ethnicity</td> <td>White british %</td> <td>40.4</td> </tr> </table>                                                                                                                                   | N |  | 182 | Age | < 65 years %  | 51.3 | Gender | Female % | 67.4 | Ethnicity | White british % | 40.4 | <p>Primary care</p> <p>Country: UK (London Borough of Redbridge, Greater London)</p> | <table border="1" data-bbox="1308 1299 2228 1898"> <tr> <td>Name</td> <td>Social prescribing service in Redbridge</td> </tr> <tr> <td>Why</td> <td>Rising tide of long-term conditions, growing health inequalities, improve the health and well-being of patients</td> </tr> <tr> <td>What</td> <td>To build an action plan towards personal goals and further support from community and statutory services if appropriate; accompanying them to a service, chaperoning, research and language support</td> </tr> <tr> <td>Who provided</td> <td>Four Social Prescribing Advisors (SPAs) in, to work alongside the two SP Coordinators and four Health and Wellbeing Buddies and Integrative Psychotherapist</td> </tr> <tr> <td>How</td> <td>GPs refer patients who meet the criteria to a Social Prescribing Coordinator for assessment, the patient is then allocated a Health and Wellbeing Buddy (HWB), they build an action plan towards personal goals and further support from community and statutory services if appropriate</td> </tr> <tr> <td>Where</td> <td>Via phone, face-to-face</td> </tr> <tr> <td>When and How Much</td> <td>up to five one-to-one sessions in a 12-week period (although this can be flexible)</td> </tr> <tr> <td>Tailoring</td> <td>Personalized action plans</td> </tr> </table> | Name | Social prescribing service in Redbridge | Why        | Rising tide of long-term conditions, growing health inequalities, improve the health and well-being of patients | What  | To build an action plan towards personal goals and further support from community and statutory services if appropriate; accompanying them to a service, chaperoning, research and language support | Who provided | Four Social Prescribing Advisors (SPAs) in, to work alongside the two SP Coordinators and four Health and Wellbeing Buddies and Integrative Psychotherapist | How                                                                                                                                                                                                                                                                                                                                                                                                                                                                                                                                                                                                                                                                                                                                                                                                                                                                                                                                                                                                                                                                                                                                                                                                                                                                                                                                                                                                                                                                                                                                                                                                                                                                                                                                                                                                                                                                                                                                                                                                                                                                                                                            | GPs refer patients who meet the criteria to a Social Prescribing Coordinator for assessment, the patient is then allocated a Health and Wellbeing Buddy (HWB), they build an action plan towards personal goals and further support from community and statutory services if appropriate | Where                                        | Via phone, face-to-face | When and How Much                                                                                                                 | up to five one-to-one sessions in a 12-week period (although this can be flexible) | Tailoring                                                                                                                                                                         | Personalized action plans | <p>Patient outcomes at baseline (pre intervention) and 6-months follow-up collected and inputted by Health and Wellbeing Buddies (HWBs) and Social Prescribing Advisors (SPA):</p> <ul style="list-style-type: none"> <li>- Personal Well-being by the Office for National Statistics (ONS)</li> <li>- Visual Analog Scale (EQ-VAS)</li> <li>- EQ-5D-5L</li> <li>- Short Warwick Edinburgh Mental Wellbeing Scale (SWEMWBS)</li> <li>- Campaign to End Loneliness tool</li> <li>- -Measure Yourself Concerns and Wellbeing tool (MYCAW)*</li> <li>- -social capital* (social networks and support)</li> </ul> | <p>Peer-Review: no</p> <p>Funding source: Redbridge Borough Council and Redbridge Clinical Commissioning Group have commissioned the Institute for Health and Human Development based at the University of East London (UEL)</p> <p>Declaration of interest: Not mentioned</p> |                                                                                                                                                                            |  |                                                                                                                                                                            |      |                                                                        |              |                                                                       |     |                                                                                                                                                                               |       |                |                   |                                                                                                                                                                                                                                                                                                                                    |           |              |                                                                                                                                                                                                                                                                                                                                                                                                                                                                                                                                                                                                                                                                                        |                                                                                                                                                                            |
| N                             |                                                                                                                                                                                                                                                                                                                                    | 182                                                                                                                                                                                                                                                                                                                                                                                                                                                                                                                                                                                                                                                                                                                                                                                       |   |  |     |     |               |      |        |          |      |           |                 |      |                                                                                      |                                                                                                                                                                                                                                                                                                                                                                                                                                                                                                                                                                                                                                                                                                                                                                                                                                                                                                                                                                                                                                                                                                                                                                                                                                                                                                                            |      |                                         |            |                                                                                                                 |       |                                                                                                                                                                                                     |              |                                                                                                                                                             |                                                                                                                                                                                                                                                                                                                                                                                                                                                                                                                                                                                                                                                                                                                                                                                                                                                                                                                                                                                                                                                                                                                                                                                                                                                                                                                                                                                                                                                                                                                                                                                                                                                                                                                                                                                                                                                                                                                                                                                                                                                                                                                                |                                                                                                                                                                                                                                                                                          |                                              |                         |                                                                                                                                   |                                                                                    |                                                                                                                                                                                   |                           |                                                                                                                                                                                                                                                                                                                                                                                                                                                                                                                                                                                                               |                                                                                                                                                                                                                                                                                |                                                                                                                                                                            |  |                                                                                                                                                                            |      |                                                                        |              |                                                                       |     |                                                                                                                                                                               |       |                |                   |                                                                                                                                                                                                                                                                                                                                    |           |              |                                                                                                                                                                                                                                                                                                                                                                                                                                                                                                                                                                                                                                                                                        |                                                                                                                                                                            |
| Age                           | < 65 years %                                                                                                                                                                                                                                                                                                                       | 51.3                                                                                                                                                                                                                                                                                                                                                                                                                                                                                                                                                                                                                                                                                                                                                                                      |   |  |     |     |               |      |        |          |      |           |                 |      |                                                                                      |                                                                                                                                                                                                                                                                                                                                                                                                                                                                                                                                                                                                                                                                                                                                                                                                                                                                                                                                                                                                                                                                                                                                                                                                                                                                                                                            |      |                                         |            |                                                                                                                 |       |                                                                                                                                                                                                     |              |                                                                                                                                                             |                                                                                                                                                                                                                                                                                                                                                                                                                                                                                                                                                                                                                                                                                                                                                                                                                                                                                                                                                                                                                                                                                                                                                                                                                                                                                                                                                                                                                                                                                                                                                                                                                                                                                                                                                                                                                                                                                                                                                                                                                                                                                                                                |                                                                                                                                                                                                                                                                                          |                                              |                         |                                                                                                                                   |                                                                                    |                                                                                                                                                                                   |                           |                                                                                                                                                                                                                                                                                                                                                                                                                                                                                                                                                                                                               |                                                                                                                                                                                                                                                                                |                                                                                                                                                                            |  |                                                                                                                                                                            |      |                                                                        |              |                                                                       |     |                                                                                                                                                                               |       |                |                   |                                                                                                                                                                                                                                                                                                                                    |           |              |                                                                                                                                                                                                                                                                                                                                                                                                                                                                                                                                                                                                                                                                                        |                                                                                                                                                                            |
| Gender                        | Female %                                                                                                                                                                                                                                                                                                                           | 67.4                                                                                                                                                                                                                                                                                                                                                                                                                                                                                                                                                                                                                                                                                                                                                                                      |   |  |     |     |               |      |        |          |      |           |                 |      |                                                                                      |                                                                                                                                                                                                                                                                                                                                                                                                                                                                                                                                                                                                                                                                                                                                                                                                                                                                                                                                                                                                                                                                                                                                                                                                                                                                                                                            |      |                                         |            |                                                                                                                 |       |                                                                                                                                                                                                     |              |                                                                                                                                                             |                                                                                                                                                                                                                                                                                                                                                                                                                                                                                                                                                                                                                                                                                                                                                                                                                                                                                                                                                                                                                                                                                                                                                                                                                                                                                                                                                                                                                                                                                                                                                                                                                                                                                                                                                                                                                                                                                                                                                                                                                                                                                                                                |                                                                                                                                                                                                                                                                                          |                                              |                         |                                                                                                                                   |                                                                                    |                                                                                                                                                                                   |                           |                                                                                                                                                                                                                                                                                                                                                                                                                                                                                                                                                                                                               |                                                                                                                                                                                                                                                                                |                                                                                                                                                                            |  |                                                                                                                                                                            |      |                                                                        |              |                                                                       |     |                                                                                                                                                                               |       |                |                   |                                                                                                                                                                                                                                                                                                                                    |           |              |                                                                                                                                                                                                                                                                                                                                                                                                                                                                                                                                                                                                                                                                                        |                                                                                                                                                                            |
| Ethnicity                     | White british %                                                                                                                                                                                                                                                                                                                    | 40.4                                                                                                                                                                                                                                                                                                                                                                                                                                                                                                                                                                                                                                                                                                                                                                                      |   |  |     |     |               |      |        |          |      |           |                 |      |                                                                                      |                                                                                                                                                                                                                                                                                                                                                                                                                                                                                                                                                                                                                                                                                                                                                                                                                                                                                                                                                                                                                                                                                                                                                                                                                                                                                                                            |      |                                         |            |                                                                                                                 |       |                                                                                                                                                                                                     |              |                                                                                                                                                             |                                                                                                                                                                                                                                                                                                                                                                                                                                                                                                                                                                                                                                                                                                                                                                                                                                                                                                                                                                                                                                                                                                                                                                                                                                                                                                                                                                                                                                                                                                                                                                                                                                                                                                                                                                                                                                                                                                                                                                                                                                                                                                                                |                                                                                                                                                                                                                                                                                          |                                              |                         |                                                                                                                                   |                                                                                    |                                                                                                                                                                                   |                           |                                                                                                                                                                                                                                                                                                                                                                                                                                                                                                                                                                                                               |                                                                                                                                                                                                                                                                                |                                                                                                                                                                            |  |                                                                                                                                                                            |      |                                                                        |              |                                                                       |     |                                                                                                                                                                               |       |                |                   |                                                                                                                                                                                                                                                                                                                                    |           |              |                                                                                                                                                                                                                                                                                                                                                                                                                                                                                                                                                                                                                                                                                        |                                                                                                                                                                            |
| Name                          | Social prescribing service in Redbridge                                                                                                                                                                                                                                                                                            |                                                                                                                                                                                                                                                                                                                                                                                                                                                                                                                                                                                                                                                                                                                                                                                           |   |  |     |     |               |      |        |          |      |           |                 |      |                                                                                      |                                                                                                                                                                                                                                                                                                                                                                                                                                                                                                                                                                                                                                                                                                                                                                                                                                                                                                                                                                                                                                                                                                                                                                                                                                                                                                                            |      |                                         |            |                                                                                                                 |       |                                                                                                                                                                                                     |              |                                                                                                                                                             |                                                                                                                                                                                                                                                                                                                                                                                                                                                                                                                                                                                                                                                                                                                                                                                                                                                                                                                                                                                                                                                                                                                                                                                                                                                                                                                                                                                                                                                                                                                                                                                                                                                                                                                                                                                                                                                                                                                                                                                                                                                                                                                                |                                                                                                                                                                                                                                                                                          |                                              |                         |                                                                                                                                   |                                                                                    |                                                                                                                                                                                   |                           |                                                                                                                                                                                                                                                                                                                                                                                                                                                                                                                                                                                                               |                                                                                                                                                                                                                                                                                |                                                                                                                                                                            |  |                                                                                                                                                                            |      |                                                                        |              |                                                                       |     |                                                                                                                                                                               |       |                |                   |                                                                                                                                                                                                                                                                                                                                    |           |              |                                                                                                                                                                                                                                                                                                                                                                                                                                                                                                                                                                                                                                                                                        |                                                                                                                                                                            |
| Why                           | Rising tide of long-term conditions, growing health inequalities, improve the health and well-being of patients                                                                                                                                                                                                                    |                                                                                                                                                                                                                                                                                                                                                                                                                                                                                                                                                                                                                                                                                                                                                                                           |   |  |     |     |               |      |        |          |      |           |                 |      |                                                                                      |                                                                                                                                                                                                                                                                                                                                                                                                                                                                                                                                                                                                                                                                                                                                                                                                                                                                                                                                                                                                                                                                                                                                                                                                                                                                                                                            |      |                                         |            |                                                                                                                 |       |                                                                                                                                                                                                     |              |                                                                                                                                                             |                                                                                                                                                                                                                                                                                                                                                                                                                                                                                                                                                                                                                                                                                                                                                                                                                                                                                                                                                                                                                                                                                                                                                                                                                                                                                                                                                                                                                                                                                                                                                                                                                                                                                                                                                                                                                                                                                                                                                                                                                                                                                                                                |                                                                                                                                                                                                                                                                                          |                                              |                         |                                                                                                                                   |                                                                                    |                                                                                                                                                                                   |                           |                                                                                                                                                                                                                                                                                                                                                                                                                                                                                                                                                                                                               |                                                                                                                                                                                                                                                                                |                                                                                                                                                                            |  |                                                                                                                                                                            |      |                                                                        |              |                                                                       |     |                                                                                                                                                                               |       |                |                   |                                                                                                                                                                                                                                                                                                                                    |           |              |                                                                                                                                                                                                                                                                                                                                                                                                                                                                                                                                                                                                                                                                                        |                                                                                                                                                                            |
| What                          | To build an action plan towards personal goals and further support from community and statutory services if appropriate; accompanying them to a service, chaperoning, research and language support                                                                                                                                |                                                                                                                                                                                                                                                                                                                                                                                                                                                                                                                                                                                                                                                                                                                                                                                           |   |  |     |     |               |      |        |          |      |           |                 |      |                                                                                      |                                                                                                                                                                                                                                                                                                                                                                                                                                                                                                                                                                                                                                                                                                                                                                                                                                                                                                                                                                                                                                                                                                                                                                                                                                                                                                                            |      |                                         |            |                                                                                                                 |       |                                                                                                                                                                                                     |              |                                                                                                                                                             |                                                                                                                                                                                                                                                                                                                                                                                                                                                                                                                                                                                                                                                                                                                                                                                                                                                                                                                                                                                                                                                                                                                                                                                                                                                                                                                                                                                                                                                                                                                                                                                                                                                                                                                                                                                                                                                                                                                                                                                                                                                                                                                                |                                                                                                                                                                                                                                                                                          |                                              |                         |                                                                                                                                   |                                                                                    |                                                                                                                                                                                   |                           |                                                                                                                                                                                                                                                                                                                                                                                                                                                                                                                                                                                                               |                                                                                                                                                                                                                                                                                |                                                                                                                                                                            |  |                                                                                                                                                                            |      |                                                                        |              |                                                                       |     |                                                                                                                                                                               |       |                |                   |                                                                                                                                                                                                                                                                                                                                    |           |              |                                                                                                                                                                                                                                                                                                                                                                                                                                                                                                                                                                                                                                                                                        |                                                                                                                                                                            |
| Who provided                  | Four Social Prescribing Advisors (SPAs) in, to work alongside the two SP Coordinators and four Health and Wellbeing Buddies and Integrative Psychotherapist                                                                                                                                                                        |                                                                                                                                                                                                                                                                                                                                                                                                                                                                                                                                                                                                                                                                                                                                                                                           |   |  |     |     |               |      |        |          |      |           |                 |      |                                                                                      |                                                                                                                                                                                                                                                                                                                                                                                                                                                                                                                                                                                                                                                                                                                                                                                                                                                                                                                                                                                                                                                                                                                                                                                                                                                                                                                            |      |                                         |            |                                                                                                                 |       |                                                                                                                                                                                                     |              |                                                                                                                                                             |                                                                                                                                                                                                                                                                                                                                                                                                                                                                                                                                                                                                                                                                                                                                                                                                                                                                                                                                                                                                                                                                                                                                                                                                                                                                                                                                                                                                                                                                                                                                                                                                                                                                                                                                                                                                                                                                                                                                                                                                                                                                                                                                |                                                                                                                                                                                                                                                                                          |                                              |                         |                                                                                                                                   |                                                                                    |                                                                                                                                                                                   |                           |                                                                                                                                                                                                                                                                                                                                                                                                                                                                                                                                                                                                               |                                                                                                                                                                                                                                                                                |                                                                                                                                                                            |  |                                                                                                                                                                            |      |                                                                        |              |                                                                       |     |                                                                                                                                                                               |       |                |                   |                                                                                                                                                                                                                                                                                                                                    |           |              |                                                                                                                                                                                                                                                                                                                                                                                                                                                                                                                                                                                                                                                                                        |                                                                                                                                                                            |
| How                           | GPs refer patients who meet the criteria to a Social Prescribing Coordinator for assessment, the patient is then allocated a Health and Wellbeing Buddy (HWB), they build an action plan towards personal goals and further support from community and statutory services if appropriate                                           |                                                                                                                                                                                                                                                                                                                                                                                                                                                                                                                                                                                                                                                                                                                                                                                           |   |  |     |     |               |      |        |          |      |           |                 |      |                                                                                      |                                                                                                                                                                                                                                                                                                                                                                                                                                                                                                                                                                                                                                                                                                                                                                                                                                                                                                                                                                                                                                                                                                                                                                                                                                                                                                                            |      |                                         |            |                                                                                                                 |       |                                                                                                                                                                                                     |              |                                                                                                                                                             |                                                                                                                                                                                                                                                                                                                                                                                                                                                                                                                                                                                                                                                                                                                                                                                                                                                                                                                                                                                                                                                                                                                                                                                                                                                                                                                                                                                                                                                                                                                                                                                                                                                                                                                                                                                                                                                                                                                                                                                                                                                                                                                                |                                                                                                                                                                                                                                                                                          |                                              |                         |                                                                                                                                   |                                                                                    |                                                                                                                                                                                   |                           |                                                                                                                                                                                                                                                                                                                                                                                                                                                                                                                                                                                                               |                                                                                                                                                                                                                                                                                |                                                                                                                                                                            |  |                                                                                                                                                                            |      |                                                                        |              |                                                                       |     |                                                                                                                                                                               |       |                |                   |                                                                                                                                                                                                                                                                                                                                    |           |              |                                                                                                                                                                                                                                                                                                                                                                                                                                                                                                                                                                                                                                                                                        |                                                                                                                                                                            |
| Where                         | Via phone, face-to-face                                                                                                                                                                                                                                                                                                            |                                                                                                                                                                                                                                                                                                                                                                                                                                                                                                                                                                                                                                                                                                                                                                                           |   |  |     |     |               |      |        |          |      |           |                 |      |                                                                                      |                                                                                                                                                                                                                                                                                                                                                                                                                                                                                                                                                                                                                                                                                                                                                                                                                                                                                                                                                                                                                                                                                                                                                                                                                                                                                                                            |      |                                         |            |                                                                                                                 |       |                                                                                                                                                                                                     |              |                                                                                                                                                             |                                                                                                                                                                                                                                                                                                                                                                                                                                                                                                                                                                                                                                                                                                                                                                                                                                                                                                                                                                                                                                                                                                                                                                                                                                                                                                                                                                                                                                                                                                                                                                                                                                                                                                                                                                                                                                                                                                                                                                                                                                                                                                                                |                                                                                                                                                                                                                                                                                          |                                              |                         |                                                                                                                                   |                                                                                    |                                                                                                                                                                                   |                           |                                                                                                                                                                                                                                                                                                                                                                                                                                                                                                                                                                                                               |                                                                                                                                                                                                                                                                                |                                                                                                                                                                            |  |                                                                                                                                                                            |      |                                                                        |              |                                                                       |     |                                                                                                                                                                               |       |                |                   |                                                                                                                                                                                                                                                                                                                                    |           |              |                                                                                                                                                                                                                                                                                                                                                                                                                                                                                                                                                                                                                                                                                        |                                                                                                                                                                            |
| When and How Much             | up to five one-to-one sessions in a 12-week period (although this can be flexible)                                                                                                                                                                                                                                                 |                                                                                                                                                                                                                                                                                                                                                                                                                                                                                                                                                                                                                                                                                                                                                                                           |   |  |     |     |               |      |        |          |      |           |                 |      |                                                                                      |                                                                                                                                                                                                                                                                                                                                                                                                                                                                                                                                                                                                                                                                                                                                                                                                                                                                                                                                                                                                                                                                                                                                                                                                                                                                                                                            |      |                                         |            |                                                                                                                 |       |                                                                                                                                                                                                     |              |                                                                                                                                                             |                                                                                                                                                                                                                                                                                                                                                                                                                                                                                                                                                                                                                                                                                                                                                                                                                                                                                                                                                                                                                                                                                                                                                                                                                                                                                                                                                                                                                                                                                                                                                                                                                                                                                                                                                                                                                                                                                                                                                                                                                                                                                                                                |                                                                                                                                                                                                                                                                                          |                                              |                         |                                                                                                                                   |                                                                                    |                                                                                                                                                                                   |                           |                                                                                                                                                                                                                                                                                                                                                                                                                                                                                                                                                                                                               |                                                                                                                                                                                                                                                                                |                                                                                                                                                                            |  |                                                                                                                                                                            |      |                                                                        |              |                                                                       |     |                                                                                                                                                                               |       |                |                   |                                                                                                                                                                                                                                                                                                                                    |           |              |                                                                                                                                                                                                                                                                                                                                                                                                                                                                                                                                                                                                                                                                                        |                                                                                                                                                                            |
| Tailoring                     | Personalized action plans                                                                                                                                                                                                                                                                                                          |                                                                                                                                                                                                                                                                                                                                                                                                                                                                                                                                                                                                                                                                                                                                                                                           |   |  |     |     |               |      |        |          |      |           |                 |      |                                                                                      |                                                                                                                                                                                                                                                                                                                                                                                                                                                                                                                                                                                                                                                                                                                                                                                                                                                                                                                                                                                                                                                                                                                                                                                                                                                                                                                            |      |                                         |            |                                                                                                                 |       |                                                                                                                                                                                                     |              |                                                                                                                                                             |                                                                                                                                                                                                                                                                                                                                                                                                                                                                                                                                                                                                                                                                                                                                                                                                                                                                                                                                                                                                                                                                                                                                                                                                                                                                                                                                                                                                                                                                                                                                                                                                                                                                                                                                                                                                                                                                                                                                                                                                                                                                                                                                |                                                                                                                                                                                                                                                                                          |                                              |                         |                                                                                                                                   |                                                                                    |                                                                                                                                                                                   |                           |                                                                                                                                                                                                                                                                                                                                                                                                                                                                                                                                                                                                               |                                                                                                                                                                                                                                                                                |                                                                                                                                                                            |  |                                                                                                                                                                            |      |                                                                        |              |                                                                       |     |                                                                                                                                                                               |       |                |                   |                                                                                                                                                                                                                                                                                                                                    |           |              |                                                                                                                                                                                                                                                                                                                                                                                                                                                                                                                                                                                                                                                                                        |                                                                                                                                                                            |

|                        |                                                                                                                                                                                                                                                         |                                                                                                                                                                                                                                                                                                                                                                                                                                                                                                                                                                                                                                                                                                                                                                                                                                                                            |                     |         |      |                   |             |     |        |                     |      |                                                         |                 |      |                                                                                                                                                                                                                                                                                                             |                                  |                                                                                                                                                                                                        |                                                                                                                                                                                                                                                                                |             |     |       |                                                                          |      |                                                                                                  |                                                                                                                                                                                                                                                                                                                                                                                                                                                                                                                                                                                                                                                                                                                                                                                                                                                                                                                                                                                                                                                                                                                                                                                                                                                                                                                                                                                                                            |      |                                                |     |                                                                                   |      |                                                                                                                                                                                                                                                |              |                                                                                                                      |     |                                                                                                                                                                                                                                                         |       |   |                   |                                                                   |           |                              |               |                                                                                                                                                |                                                                                                                                                                                                                                                                                                                                                                                                                          |                                                                                                                                                                            |
|------------------------|---------------------------------------------------------------------------------------------------------------------------------------------------------------------------------------------------------------------------------------------------------|----------------------------------------------------------------------------------------------------------------------------------------------------------------------------------------------------------------------------------------------------------------------------------------------------------------------------------------------------------------------------------------------------------------------------------------------------------------------------------------------------------------------------------------------------------------------------------------------------------------------------------------------------------------------------------------------------------------------------------------------------------------------------------------------------------------------------------------------------------------------------|---------------------|---------|------|-------------------|-------------|-----|--------|---------------------|------|---------------------------------------------------------|-----------------|------|-------------------------------------------------------------------------------------------------------------------------------------------------------------------------------------------------------------------------------------------------------------------------------------------------------------|----------------------------------|--------------------------------------------------------------------------------------------------------------------------------------------------------------------------------------------------------|--------------------------------------------------------------------------------------------------------------------------------------------------------------------------------------------------------------------------------------------------------------------------------|-------------|-----|-------|--------------------------------------------------------------------------|------|--------------------------------------------------------------------------------------------------|----------------------------------------------------------------------------------------------------------------------------------------------------------------------------------------------------------------------------------------------------------------------------------------------------------------------------------------------------------------------------------------------------------------------------------------------------------------------------------------------------------------------------------------------------------------------------------------------------------------------------------------------------------------------------------------------------------------------------------------------------------------------------------------------------------------------------------------------------------------------------------------------------------------------------------------------------------------------------------------------------------------------------------------------------------------------------------------------------------------------------------------------------------------------------------------------------------------------------------------------------------------------------------------------------------------------------------------------------------------------------------------------------------------------------|------|------------------------------------------------|-----|-----------------------------------------------------------------------------------|------|------------------------------------------------------------------------------------------------------------------------------------------------------------------------------------------------------------------------------------------------|--------------|----------------------------------------------------------------------------------------------------------------------|-----|---------------------------------------------------------------------------------------------------------------------------------------------------------------------------------------------------------------------------------------------------------|-------|---|-------------------|-------------------------------------------------------------------|-----------|------------------------------|---------------|------------------------------------------------------------------------------------------------------------------------------------------------|--------------------------------------------------------------------------------------------------------------------------------------------------------------------------------------------------------------------------------------------------------------------------------------------------------------------------------------------------------------------------------------------------------------------------|----------------------------------------------------------------------------------------------------------------------------------------------------------------------------|
|                        |                                                                                                                                                                                                                                                         | <table border="1"> <tr> <td>Living arrangements</td> <td>Alone %</td> <td>45.6</td> </tr> <tr> <td>Employment status</td> <td>Full-time %</td> <td>2.3</td> </tr> <tr> <td rowspan="2">other</td> <td>Carer status: yes %</td> <td>20.9</td> </tr> <tr> <td>Long standing physical/mental illness (limited a lot) %</td> <td>49.1</td> </tr> </table> <p>Population: General</p>                                                                                                                                                                                                                                                                                                                                                                                                                                                                                           | Living arrangements | Alone % | 45.6 | Employment status | Full-time % | 2.3 | other  | Carer status: yes % | 20.9 | Long standing physical/mental illness (limited a lot) % | 49.1            |      | <table border="1"> <tr> <td>Modifications</td> <td>Redbridge CVS made changes to their team structure by recruiting four Social Prescribing Advisors (SPAs) in July 2019, to work alongside the two SP Coordinators and four Health and Wellbeing Buddies</td> </tr> </table> <p>Intervention: Holistic</p> | Modifications                    | Redbridge CVS made changes to their team structure by recruiting four Social Prescribing Advisors (SPAs) in July 2019, to work alongside the two SP Coordinators and four Health and Wellbeing Buddies | <p>Process of Care measures at baseline and 6-months follow-up:</p> <ul style="list-style-type: none"> <li>- GP visits</li> <li>- A&amp;E visits</li> </ul> <p>Economic evaluation:</p> <ul style="list-style-type: none"> <li>- Social Return on Investment (SROI)</li> </ul> |             |     |       |                                                                          |      |                                                                                                  |                                                                                                                                                                                                                                                                                                                                                                                                                                                                                                                                                                                                                                                                                                                                                                                                                                                                                                                                                                                                                                                                                                                                                                                                                                                                                                                                                                                                                            |      |                                                |     |                                                                                   |      |                                                                                                                                                                                                                                                |              |                                                                                                                      |     |                                                                                                                                                                                                                                                         |       |   |                   |                                                                   |           |                              |               |                                                                                                                                                |                                                                                                                                                                                                                                                                                                                                                                                                                          |                                                                                                                                                                            |
| Living arrangements    | Alone %                                                                                                                                                                                                                                                 | 45.6                                                                                                                                                                                                                                                                                                                                                                                                                                                                                                                                                                                                                                                                                                                                                                                                                                                                       |                     |         |      |                   |             |     |        |                     |      |                                                         |                 |      |                                                                                                                                                                                                                                                                                                             |                                  |                                                                                                                                                                                                        |                                                                                                                                                                                                                                                                                |             |     |       |                                                                          |      |                                                                                                  |                                                                                                                                                                                                                                                                                                                                                                                                                                                                                                                                                                                                                                                                                                                                                                                                                                                                                                                                                                                                                                                                                                                                                                                                                                                                                                                                                                                                                            |      |                                                |     |                                                                                   |      |                                                                                                                                                                                                                                                |              |                                                                                                                      |     |                                                                                                                                                                                                                                                         |       |   |                   |                                                                   |           |                              |               |                                                                                                                                                |                                                                                                                                                                                                                                                                                                                                                                                                                          |                                                                                                                                                                            |
| Employment status      | Full-time %                                                                                                                                                                                                                                             | 2.3                                                                                                                                                                                                                                                                                                                                                                                                                                                                                                                                                                                                                                                                                                                                                                                                                                                                        |                     |         |      |                   |             |     |        |                     |      |                                                         |                 |      |                                                                                                                                                                                                                                                                                                             |                                  |                                                                                                                                                                                                        |                                                                                                                                                                                                                                                                                |             |     |       |                                                                          |      |                                                                                                  |                                                                                                                                                                                                                                                                                                                                                                                                                                                                                                                                                                                                                                                                                                                                                                                                                                                                                                                                                                                                                                                                                                                                                                                                                                                                                                                                                                                                                            |      |                                                |     |                                                                                   |      |                                                                                                                                                                                                                                                |              |                                                                                                                      |     |                                                                                                                                                                                                                                                         |       |   |                   |                                                                   |           |                              |               |                                                                                                                                                |                                                                                                                                                                                                                                                                                                                                                                                                                          |                                                                                                                                                                            |
| other                  | Carer status: yes %                                                                                                                                                                                                                                     | 20.9                                                                                                                                                                                                                                                                                                                                                                                                                                                                                                                                                                                                                                                                                                                                                                                                                                                                       |                     |         |      |                   |             |     |        |                     |      |                                                         |                 |      |                                                                                                                                                                                                                                                                                                             |                                  |                                                                                                                                                                                                        |                                                                                                                                                                                                                                                                                |             |     |       |                                                                          |      |                                                                                                  |                                                                                                                                                                                                                                                                                                                                                                                                                                                                                                                                                                                                                                                                                                                                                                                                                                                                                                                                                                                                                                                                                                                                                                                                                                                                                                                                                                                                                            |      |                                                |     |                                                                                   |      |                                                                                                                                                                                                                                                |              |                                                                                                                      |     |                                                                                                                                                                                                                                                         |       |   |                   |                                                                   |           |                              |               |                                                                                                                                                |                                                                                                                                                                                                                                                                                                                                                                                                                          |                                                                                                                                                                            |
|                        | Long standing physical/mental illness (limited a lot) %                                                                                                                                                                                                 | 49.1                                                                                                                                                                                                                                                                                                                                                                                                                                                                                                                                                                                                                                                                                                                                                                                                                                                                       |                     |         |      |                   |             |     |        |                     |      |                                                         |                 |      |                                                                                                                                                                                                                                                                                                             |                                  |                                                                                                                                                                                                        |                                                                                                                                                                                                                                                                                |             |     |       |                                                                          |      |                                                                                                  |                                                                                                                                                                                                                                                                                                                                                                                                                                                                                                                                                                                                                                                                                                                                                                                                                                                                                                                                                                                                                                                                                                                                                                                                                                                                                                                                                                                                                            |      |                                                |     |                                                                                   |      |                                                                                                                                                                                                                                                |              |                                                                                                                      |     |                                                                                                                                                                                                                                                         |       |   |                   |                                                                   |           |                              |               |                                                                                                                                                |                                                                                                                                                                                                                                                                                                                                                                                                                          |                                                                                                                                                                            |
| Modifications          | Redbridge CVS made changes to their team structure by recruiting four Social Prescribing Advisors (SPAs) in July 2019, to work alongside the two SP Coordinators and four Health and Wellbeing Buddies                                                  |                                                                                                                                                                                                                                                                                                                                                                                                                                                                                                                                                                                                                                                                                                                                                                                                                                                                            |                     |         |      |                   |             |     |        |                     |      |                                                         |                 |      |                                                                                                                                                                                                                                                                                                             |                                  |                                                                                                                                                                                                        |                                                                                                                                                                                                                                                                                |             |     |       |                                                                          |      |                                                                                                  |                                                                                                                                                                                                                                                                                                                                                                                                                                                                                                                                                                                                                                                                                                                                                                                                                                                                                                                                                                                                                                                                                                                                                                                                                                                                                                                                                                                                                            |      |                                                |     |                                                                                   |      |                                                                                                                                                                                                                                                |              |                                                                                                                      |     |                                                                                                                                                                                                                                                         |       |   |                   |                                                                   |           |                              |               |                                                                                                                                                |                                                                                                                                                                                                                                                                                                                                                                                                                          |                                                                                                                                                                            |
| Bertotti 2020 (b) (44) | <p>Uncontrolled before-and-after study</p> <p>Study length: 14 months</p>                                                                                                                                                                               | <p><b>Inclusion criteria:-</b></p> <p><b>Exclusion criteria:</b></p> <ul style="list-style-type: none"> <li>- service users with a high level of vulnerability</li> <li>- people facing eviction or with complex mental health problems</li> </ul> <p>Baseline characteristics:</p> <table border="1"> <tr> <td>N</td> <td></td> <td>166</td> </tr> <tr> <td>Age</td> <td>Mean</td> <td>48</td> </tr> <tr> <td>Gender</td> <td>Female %</td> <td>66.3</td> </tr> <tr> <td>Ethnicity</td> <td>White british %</td> <td>22.1</td> </tr> <tr> <td>Living arrangement</td> <td>With others (including family) %</td> <td>49.1</td> </tr> <tr> <td>Employment status</td> <td>Full-time %</td> <td>9.9</td> </tr> <tr> <td>Other</td> <td>Educational level: age 20 or over (age when respondent left education) %</td> <td>39.4</td> </tr> </table> <p>Population: Unclear</p> | N                   |         | 166  | Age               | Mean        | 48  | Gender | Female %            | 66.3 | Ethnicity                                               | White british % | 22.1 | Living arrangement                                                                                                                                                                                                                                                                                          | With others (including family) % | 49.1                                                                                                                                                                                                   | Employment status                                                                                                                                                                                                                                                              | Full-time % | 9.9 | Other | Educational level: age 20 or over (age when respondent left education) % | 39.4 | <p>Primary care</p> <p>Country:</p> <p>UK (London Borough of Hackney and City, Inner London)</p> | <table border="1"> <tr> <td>Name</td> <td>Social Prescribing Service in City and Hackney</td> </tr> <tr> <td>Why</td> <td>Growing pressure on GPs, long term conditions rising, growing health inequalities</td> </tr> <tr> <td>What</td> <td>Provide time, empathy and crucially support to access non-clinical services offered by the VCSE (Voluntary, Community and Social Enterprise) sector in City and Hackney (a total of 150 organisations in both voluntary and statutory sectors)</td> </tr> <tr> <td>Who provided</td> <td>Referrals from all 40 GP practices in Hackney and City (East London) to four Social Prescribing Link Workers (SPLWs)</td> </tr> <tr> <td>How</td> <td>Type of support offered by SPLWs is tailored made to each case and include not just support with managing health problems but, critically, support with social issues such as employment, housing or debt with the view of tackling health inequalities</td> </tr> <tr> <td>Where</td> <td>-</td> </tr> <tr> <td>When and How Much</td> <td>Meet SPLWs up to 6 times, for an average session of 30-40 minutes</td> </tr> <tr> <td>Tailoring</td> <td>Personalized recommendations</td> </tr> <tr> <td>Modifications</td> <td>Although the majority of referrals come through GP practices, the social prescribing scheme does now also receive referrals from other sources</td> </tr> </table> <p>Intervention: Holistic</p> | Name | Social Prescribing Service in City and Hackney | Why | Growing pressure on GPs, long term conditions rising, growing health inequalities | What | Provide time, empathy and crucially support to access non-clinical services offered by the VCSE (Voluntary, Community and Social Enterprise) sector in City and Hackney (a total of 150 organisations in both voluntary and statutory sectors) | Who provided | Referrals from all 40 GP practices in Hackney and City (East London) to four Social Prescribing Link Workers (SPLWs) | How | Type of support offered by SPLWs is tailored made to each case and include not just support with managing health problems but, critically, support with social issues such as employment, housing or debt with the view of tackling health inequalities | Where | - | When and How Much | Meet SPLWs up to 6 times, for an average session of 30-40 minutes | Tailoring | Personalized recommendations | Modifications | Although the majority of referrals come through GP practices, the social prescribing scheme does now also receive referrals from other sources | <p>Patient outcomes at baseline and 3-/6-months follow-up collected by Family Action and the Institute for Health and Human</p> <p>Development (IHHD):</p> <ul style="list-style-type: none"> <li>- EuroQoL (EQ-5D-5L)</li> <li>- Short Warwick Edinburgh Mental Wellbeing Scale (SWEMWBS)</li> </ul> <p>Economic evaluation:</p> <ul style="list-style-type: none"> <li>- Social Return on Investment (SROI)</li> </ul> | <p>Peer Review: no</p> <p>Funding source:</p> <p>City and Hackney Clinical Commissioning Group, Health Foundation</p> <p>Declaration of interest:</p> <p>Not mentioned</p> |
| N                      |                                                                                                                                                                                                                                                         | 166                                                                                                                                                                                                                                                                                                                                                                                                                                                                                                                                                                                                                                                                                                                                                                                                                                                                        |                     |         |      |                   |             |     |        |                     |      |                                                         |                 |      |                                                                                                                                                                                                                                                                                                             |                                  |                                                                                                                                                                                                        |                                                                                                                                                                                                                                                                                |             |     |       |                                                                          |      |                                                                                                  |                                                                                                                                                                                                                                                                                                                                                                                                                                                                                                                                                                                                                                                                                                                                                                                                                                                                                                                                                                                                                                                                                                                                                                                                                                                                                                                                                                                                                            |      |                                                |     |                                                                                   |      |                                                                                                                                                                                                                                                |              |                                                                                                                      |     |                                                                                                                                                                                                                                                         |       |   |                   |                                                                   |           |                              |               |                                                                                                                                                |                                                                                                                                                                                                                                                                                                                                                                                                                          |                                                                                                                                                                            |
| Age                    | Mean                                                                                                                                                                                                                                                    | 48                                                                                                                                                                                                                                                                                                                                                                                                                                                                                                                                                                                                                                                                                                                                                                                                                                                                         |                     |         |      |                   |             |     |        |                     |      |                                                         |                 |      |                                                                                                                                                                                                                                                                                                             |                                  |                                                                                                                                                                                                        |                                                                                                                                                                                                                                                                                |             |     |       |                                                                          |      |                                                                                                  |                                                                                                                                                                                                                                                                                                                                                                                                                                                                                                                                                                                                                                                                                                                                                                                                                                                                                                                                                                                                                                                                                                                                                                                                                                                                                                                                                                                                                            |      |                                                |     |                                                                                   |      |                                                                                                                                                                                                                                                |              |                                                                                                                      |     |                                                                                                                                                                                                                                                         |       |   |                   |                                                                   |           |                              |               |                                                                                                                                                |                                                                                                                                                                                                                                                                                                                                                                                                                          |                                                                                                                                                                            |
| Gender                 | Female %                                                                                                                                                                                                                                                | 66.3                                                                                                                                                                                                                                                                                                                                                                                                                                                                                                                                                                                                                                                                                                                                                                                                                                                                       |                     |         |      |                   |             |     |        |                     |      |                                                         |                 |      |                                                                                                                                                                                                                                                                                                             |                                  |                                                                                                                                                                                                        |                                                                                                                                                                                                                                                                                |             |     |       |                                                                          |      |                                                                                                  |                                                                                                                                                                                                                                                                                                                                                                                                                                                                                                                                                                                                                                                                                                                                                                                                                                                                                                                                                                                                                                                                                                                                                                                                                                                                                                                                                                                                                            |      |                                                |     |                                                                                   |      |                                                                                                                                                                                                                                                |              |                                                                                                                      |     |                                                                                                                                                                                                                                                         |       |   |                   |                                                                   |           |                              |               |                                                                                                                                                |                                                                                                                                                                                                                                                                                                                                                                                                                          |                                                                                                                                                                            |
| Ethnicity              | White british %                                                                                                                                                                                                                                         | 22.1                                                                                                                                                                                                                                                                                                                                                                                                                                                                                                                                                                                                                                                                                                                                                                                                                                                                       |                     |         |      |                   |             |     |        |                     |      |                                                         |                 |      |                                                                                                                                                                                                                                                                                                             |                                  |                                                                                                                                                                                                        |                                                                                                                                                                                                                                                                                |             |     |       |                                                                          |      |                                                                                                  |                                                                                                                                                                                                                                                                                                                                                                                                                                                                                                                                                                                                                                                                                                                                                                                                                                                                                                                                                                                                                                                                                                                                                                                                                                                                                                                                                                                                                            |      |                                                |     |                                                                                   |      |                                                                                                                                                                                                                                                |              |                                                                                                                      |     |                                                                                                                                                                                                                                                         |       |   |                   |                                                                   |           |                              |               |                                                                                                                                                |                                                                                                                                                                                                                                                                                                                                                                                                                          |                                                                                                                                                                            |
| Living arrangement     | With others (including family) %                                                                                                                                                                                                                        | 49.1                                                                                                                                                                                                                                                                                                                                                                                                                                                                                                                                                                                                                                                                                                                                                                                                                                                                       |                     |         |      |                   |             |     |        |                     |      |                                                         |                 |      |                                                                                                                                                                                                                                                                                                             |                                  |                                                                                                                                                                                                        |                                                                                                                                                                                                                                                                                |             |     |       |                                                                          |      |                                                                                                  |                                                                                                                                                                                                                                                                                                                                                                                                                                                                                                                                                                                                                                                                                                                                                                                                                                                                                                                                                                                                                                                                                                                                                                                                                                                                                                                                                                                                                            |      |                                                |     |                                                                                   |      |                                                                                                                                                                                                                                                |              |                                                                                                                      |     |                                                                                                                                                                                                                                                         |       |   |                   |                                                                   |           |                              |               |                                                                                                                                                |                                                                                                                                                                                                                                                                                                                                                                                                                          |                                                                                                                                                                            |
| Employment status      | Full-time %                                                                                                                                                                                                                                             | 9.9                                                                                                                                                                                                                                                                                                                                                                                                                                                                                                                                                                                                                                                                                                                                                                                                                                                                        |                     |         |      |                   |             |     |        |                     |      |                                                         |                 |      |                                                                                                                                                                                                                                                                                                             |                                  |                                                                                                                                                                                                        |                                                                                                                                                                                                                                                                                |             |     |       |                                                                          |      |                                                                                                  |                                                                                                                                                                                                                                                                                                                                                                                                                                                                                                                                                                                                                                                                                                                                                                                                                                                                                                                                                                                                                                                                                                                                                                                                                                                                                                                                                                                                                            |      |                                                |     |                                                                                   |      |                                                                                                                                                                                                                                                |              |                                                                                                                      |     |                                                                                                                                                                                                                                                         |       |   |                   |                                                                   |           |                              |               |                                                                                                                                                |                                                                                                                                                                                                                                                                                                                                                                                                                          |                                                                                                                                                                            |
| Other                  | Educational level: age 20 or over (age when respondent left education) %                                                                                                                                                                                | 39.4                                                                                                                                                                                                                                                                                                                                                                                                                                                                                                                                                                                                                                                                                                                                                                                                                                                                       |                     |         |      |                   |             |     |        |                     |      |                                                         |                 |      |                                                                                                                                                                                                                                                                                                             |                                  |                                                                                                                                                                                                        |                                                                                                                                                                                                                                                                                |             |     |       |                                                                          |      |                                                                                                  |                                                                                                                                                                                                                                                                                                                                                                                                                                                                                                                                                                                                                                                                                                                                                                                                                                                                                                                                                                                                                                                                                                                                                                                                                                                                                                                                                                                                                            |      |                                                |     |                                                                                   |      |                                                                                                                                                                                                                                                |              |                                                                                                                      |     |                                                                                                                                                                                                                                                         |       |   |                   |                                                                   |           |                              |               |                                                                                                                                                |                                                                                                                                                                                                                                                                                                                                                                                                                          |                                                                                                                                                                            |
| Name                   | Social Prescribing Service in City and Hackney                                                                                                                                                                                                          |                                                                                                                                                                                                                                                                                                                                                                                                                                                                                                                                                                                                                                                                                                                                                                                                                                                                            |                     |         |      |                   |             |     |        |                     |      |                                                         |                 |      |                                                                                                                                                                                                                                                                                                             |                                  |                                                                                                                                                                                                        |                                                                                                                                                                                                                                                                                |             |     |       |                                                                          |      |                                                                                                  |                                                                                                                                                                                                                                                                                                                                                                                                                                                                                                                                                                                                                                                                                                                                                                                                                                                                                                                                                                                                                                                                                                                                                                                                                                                                                                                                                                                                                            |      |                                                |     |                                                                                   |      |                                                                                                                                                                                                                                                |              |                                                                                                                      |     |                                                                                                                                                                                                                                                         |       |   |                   |                                                                   |           |                              |               |                                                                                                                                                |                                                                                                                                                                                                                                                                                                                                                                                                                          |                                                                                                                                                                            |
| Why                    | Growing pressure on GPs, long term conditions rising, growing health inequalities                                                                                                                                                                       |                                                                                                                                                                                                                                                                                                                                                                                                                                                                                                                                                                                                                                                                                                                                                                                                                                                                            |                     |         |      |                   |             |     |        |                     |      |                                                         |                 |      |                                                                                                                                                                                                                                                                                                             |                                  |                                                                                                                                                                                                        |                                                                                                                                                                                                                                                                                |             |     |       |                                                                          |      |                                                                                                  |                                                                                                                                                                                                                                                                                                                                                                                                                                                                                                                                                                                                                                                                                                                                                                                                                                                                                                                                                                                                                                                                                                                                                                                                                                                                                                                                                                                                                            |      |                                                |     |                                                                                   |      |                                                                                                                                                                                                                                                |              |                                                                                                                      |     |                                                                                                                                                                                                                                                         |       |   |                   |                                                                   |           |                              |               |                                                                                                                                                |                                                                                                                                                                                                                                                                                                                                                                                                                          |                                                                                                                                                                            |
| What                   | Provide time, empathy and crucially support to access non-clinical services offered by the VCSE (Voluntary, Community and Social Enterprise) sector in City and Hackney (a total of 150 organisations in both voluntary and statutory sectors)          |                                                                                                                                                                                                                                                                                                                                                                                                                                                                                                                                                                                                                                                                                                                                                                                                                                                                            |                     |         |      |                   |             |     |        |                     |      |                                                         |                 |      |                                                                                                                                                                                                                                                                                                             |                                  |                                                                                                                                                                                                        |                                                                                                                                                                                                                                                                                |             |     |       |                                                                          |      |                                                                                                  |                                                                                                                                                                                                                                                                                                                                                                                                                                                                                                                                                                                                                                                                                                                                                                                                                                                                                                                                                                                                                                                                                                                                                                                                                                                                                                                                                                                                                            |      |                                                |     |                                                                                   |      |                                                                                                                                                                                                                                                |              |                                                                                                                      |     |                                                                                                                                                                                                                                                         |       |   |                   |                                                                   |           |                              |               |                                                                                                                                                |                                                                                                                                                                                                                                                                                                                                                                                                                          |                                                                                                                                                                            |
| Who provided           | Referrals from all 40 GP practices in Hackney and City (East London) to four Social Prescribing Link Workers (SPLWs)                                                                                                                                    |                                                                                                                                                                                                                                                                                                                                                                                                                                                                                                                                                                                                                                                                                                                                                                                                                                                                            |                     |         |      |                   |             |     |        |                     |      |                                                         |                 |      |                                                                                                                                                                                                                                                                                                             |                                  |                                                                                                                                                                                                        |                                                                                                                                                                                                                                                                                |             |     |       |                                                                          |      |                                                                                                  |                                                                                                                                                                                                                                                                                                                                                                                                                                                                                                                                                                                                                                                                                                                                                                                                                                                                                                                                                                                                                                                                                                                                                                                                                                                                                                                                                                                                                            |      |                                                |     |                                                                                   |      |                                                                                                                                                                                                                                                |              |                                                                                                                      |     |                                                                                                                                                                                                                                                         |       |   |                   |                                                                   |           |                              |               |                                                                                                                                                |                                                                                                                                                                                                                                                                                                                                                                                                                          |                                                                                                                                                                            |
| How                    | Type of support offered by SPLWs is tailored made to each case and include not just support with managing health problems but, critically, support with social issues such as employment, housing or debt with the view of tackling health inequalities |                                                                                                                                                                                                                                                                                                                                                                                                                                                                                                                                                                                                                                                                                                                                                                                                                                                                            |                     |         |      |                   |             |     |        |                     |      |                                                         |                 |      |                                                                                                                                                                                                                                                                                                             |                                  |                                                                                                                                                                                                        |                                                                                                                                                                                                                                                                                |             |     |       |                                                                          |      |                                                                                                  |                                                                                                                                                                                                                                                                                                                                                                                                                                                                                                                                                                                                                                                                                                                                                                                                                                                                                                                                                                                                                                                                                                                                                                                                                                                                                                                                                                                                                            |      |                                                |     |                                                                                   |      |                                                                                                                                                                                                                                                |              |                                                                                                                      |     |                                                                                                                                                                                                                                                         |       |   |                   |                                                                   |           |                              |               |                                                                                                                                                |                                                                                                                                                                                                                                                                                                                                                                                                                          |                                                                                                                                                                            |
| Where                  | -                                                                                                                                                                                                                                                       |                                                                                                                                                                                                                                                                                                                                                                                                                                                                                                                                                                                                                                                                                                                                                                                                                                                                            |                     |         |      |                   |             |     |        |                     |      |                                                         |                 |      |                                                                                                                                                                                                                                                                                                             |                                  |                                                                                                                                                                                                        |                                                                                                                                                                                                                                                                                |             |     |       |                                                                          |      |                                                                                                  |                                                                                                                                                                                                                                                                                                                                                                                                                                                                                                                                                                                                                                                                                                                                                                                                                                                                                                                                                                                                                                                                                                                                                                                                                                                                                                                                                                                                                            |      |                                                |     |                                                                                   |      |                                                                                                                                                                                                                                                |              |                                                                                                                      |     |                                                                                                                                                                                                                                                         |       |   |                   |                                                                   |           |                              |               |                                                                                                                                                |                                                                                                                                                                                                                                                                                                                                                                                                                          |                                                                                                                                                                            |
| When and How Much      | Meet SPLWs up to 6 times, for an average session of 30-40 minutes                                                                                                                                                                                       |                                                                                                                                                                                                                                                                                                                                                                                                                                                                                                                                                                                                                                                                                                                                                                                                                                                                            |                     |         |      |                   |             |     |        |                     |      |                                                         |                 |      |                                                                                                                                                                                                                                                                                                             |                                  |                                                                                                                                                                                                        |                                                                                                                                                                                                                                                                                |             |     |       |                                                                          |      |                                                                                                  |                                                                                                                                                                                                                                                                                                                                                                                                                                                                                                                                                                                                                                                                                                                                                                                                                                                                                                                                                                                                                                                                                                                                                                                                                                                                                                                                                                                                                            |      |                                                |     |                                                                                   |      |                                                                                                                                                                                                                                                |              |                                                                                                                      |     |                                                                                                                                                                                                                                                         |       |   |                   |                                                                   |           |                              |               |                                                                                                                                                |                                                                                                                                                                                                                                                                                                                                                                                                                          |                                                                                                                                                                            |
| Tailoring              | Personalized recommendations                                                                                                                                                                                                                            |                                                                                                                                                                                                                                                                                                                                                                                                                                                                                                                                                                                                                                                                                                                                                                                                                                                                            |                     |         |      |                   |             |     |        |                     |      |                                                         |                 |      |                                                                                                                                                                                                                                                                                                             |                                  |                                                                                                                                                                                                        |                                                                                                                                                                                                                                                                                |             |     |       |                                                                          |      |                                                                                                  |                                                                                                                                                                                                                                                                                                                                                                                                                                                                                                                                                                                                                                                                                                                                                                                                                                                                                                                                                                                                                                                                                                                                                                                                                                                                                                                                                                                                                            |      |                                                |     |                                                                                   |      |                                                                                                                                                                                                                                                |              |                                                                                                                      |     |                                                                                                                                                                                                                                                         |       |   |                   |                                                                   |           |                              |               |                                                                                                                                                |                                                                                                                                                                                                                                                                                                                                                                                                                          |                                                                                                                                                                            |
| Modifications          | Although the majority of referrals come through GP practices, the social prescribing scheme does now also receive referrals from other sources                                                                                                          |                                                                                                                                                                                                                                                                                                                                                                                                                                                                                                                                                                                                                                                                                                                                                                                                                                                                            |                     |         |      |                   |             |     |        |                     |      |                                                         |                 |      |                                                                                                                                                                                                                                                                                                             |                                  |                                                                                                                                                                                                        |                                                                                                                                                                                                                                                                                |             |     |       |                                                                          |      |                                                                                                  |                                                                                                                                                                                                                                                                                                                                                                                                                                                                                                                                                                                                                                                                                                                                                                                                                                                                                                                                                                                                                                                                                                                                                                                                                                                                                                                                                                                                                            |      |                                                |     |                                                                                   |      |                                                                                                                                                                                                                                                |              |                                                                                                                      |     |                                                                                                                                                                                                                                                         |       |   |                   |                                                                   |           |                              |               |                                                                                                                                                |                                                                                                                                                                                                                                                                                                                                                                                                                          |                                                                                                                                                                            |

|                                        |                                                                                                                                                                                                                                                                                                                                                                                                                                                                                                                                                                                                                                                                                                                                                                                                         |                                                                                                                                                                                                                                                                                                                                                                                                                                                                                                                                                                                                                                                                                                                                                                                                                                                                                                                                                                                                                                                                                                                                                          |                     |                                                                                                                                                                                                                                                                                                                                                 |      |                                                    |                       |                                                                                                                                                               |                                                                                                            |                        |    |                |               |    |                    |   |   |                   |           |    |       |                  |    |                                                                      |                                                                                                                                                                                                                                                                                                                                                                                                                                                                                                                                                                                                                                                                                                                                                                                                                                                                                                                                                                                                                                                                                                                                                                                                                                                                                                                                                                                                                                                                                                                                                                                                                                                                                                                                                                                                                                                                                                                                                                                                                                                                                                                                                                                                               |      |                                                    |     |                                                                                                                                                                                                                                       |      |                                                                                                                                                                                                                                                                                                                                                                                                                                                                                                                                                                                                                                                                                                                                                                                                         |              |                                                                                                                                                                                                                                                                                                                                                                                                                                                                                                                                                                                                                                                                                                                                                                              |     |                         |       |                    |                   |                                                                       |           |                         |                                                                                                                                                                                                                                                                                                                                                                                                                                                                                                                                                                                                                          |                                                                                                                                                             |
|----------------------------------------|---------------------------------------------------------------------------------------------------------------------------------------------------------------------------------------------------------------------------------------------------------------------------------------------------------------------------------------------------------------------------------------------------------------------------------------------------------------------------------------------------------------------------------------------------------------------------------------------------------------------------------------------------------------------------------------------------------------------------------------------------------------------------------------------------------|----------------------------------------------------------------------------------------------------------------------------------------------------------------------------------------------------------------------------------------------------------------------------------------------------------------------------------------------------------------------------------------------------------------------------------------------------------------------------------------------------------------------------------------------------------------------------------------------------------------------------------------------------------------------------------------------------------------------------------------------------------------------------------------------------------------------------------------------------------------------------------------------------------------------------------------------------------------------------------------------------------------------------------------------------------------------------------------------------------------------------------------------------------|---------------------|-------------------------------------------------------------------------------------------------------------------------------------------------------------------------------------------------------------------------------------------------------------------------------------------------------------------------------------------------|------|----------------------------------------------------|-----------------------|---------------------------------------------------------------------------------------------------------------------------------------------------------------|------------------------------------------------------------------------------------------------------------|------------------------|----|----------------|---------------|----|--------------------|---|---|-------------------|-----------|----|-------|------------------|----|----------------------------------------------------------------------|---------------------------------------------------------------------------------------------------------------------------------------------------------------------------------------------------------------------------------------------------------------------------------------------------------------------------------------------------------------------------------------------------------------------------------------------------------------------------------------------------------------------------------------------------------------------------------------------------------------------------------------------------------------------------------------------------------------------------------------------------------------------------------------------------------------------------------------------------------------------------------------------------------------------------------------------------------------------------------------------------------------------------------------------------------------------------------------------------------------------------------------------------------------------------------------------------------------------------------------------------------------------------------------------------------------------------------------------------------------------------------------------------------------------------------------------------------------------------------------------------------------------------------------------------------------------------------------------------------------------------------------------------------------------------------------------------------------------------------------------------------------------------------------------------------------------------------------------------------------------------------------------------------------------------------------------------------------------------------------------------------------------------------------------------------------------------------------------------------------------------------------------------------------------------------------------------------------|------|----------------------------------------------------|-----|---------------------------------------------------------------------------------------------------------------------------------------------------------------------------------------------------------------------------------------|------|---------------------------------------------------------------------------------------------------------------------------------------------------------------------------------------------------------------------------------------------------------------------------------------------------------------------------------------------------------------------------------------------------------------------------------------------------------------------------------------------------------------------------------------------------------------------------------------------------------------------------------------------------------------------------------------------------------------------------------------------------------------------------------------------------------|--------------|------------------------------------------------------------------------------------------------------------------------------------------------------------------------------------------------------------------------------------------------------------------------------------------------------------------------------------------------------------------------------------------------------------------------------------------------------------------------------------------------------------------------------------------------------------------------------------------------------------------------------------------------------------------------------------------------------------------------------------------------------------------------------|-----|-------------------------|-------|--------------------|-------------------|-----------------------------------------------------------------------|-----------|-------------------------|--------------------------------------------------------------------------------------------------------------------------------------------------------------------------------------------------------------------------------------------------------------------------------------------------------------------------------------------------------------------------------------------------------------------------------------------------------------------------------------------------------------------------------------------------------------------------------------------------------------------------|-------------------------------------------------------------------------------------------------------------------------------------------------------------|
| <p>Beynon 2020 (45)</p>                | <p>Uncontrolled before-and-after study, mixed-methods</p> <p>Study length: 32 months</p>                                                                                                                                                                                                                                                                                                                                                                                                                                                                                                                                                                                                                                                                                                                | <p><b>Inclusion criteria:</b></p> <p>People aged 50+, living in Bristol, social, practical or emotional needs e.g.: Social Isolation, Low level depression/anxiety/stress, Bereavement, Information, advice or guidance, Carers Support, Debt or benefit issues, Housing Issues, Exercise and Healthy Living, Mobility Support</p> <p><b>Exclusion criteria:</b></p> <p>Aggressive or violent, moderate or advanced dementia, moderate or severe depression or anxiety, otherwise unable to engage or have the ability to make decisions, seeing a CPN, drug or alcohol dependency, seeing a probation officer</p> <p>Baseline characteristics:</p> <table border="1" data-bbox="477 663 1071 1010"> <tr> <td>N</td> <td></td> <td>1769</td> </tr> <tr> <td>Age</td> <td>Age group 80-89 %</td> <td>27</td> </tr> <tr> <td>Gender</td> <td>Female %</td> <td>63</td> </tr> <tr> <td>Ethnicity</td> <td>White British</td> <td>29</td> </tr> <tr> <td>Living arrangement</td> <td>-</td> <td>-</td> </tr> <tr> <td>Employment status</td> <td>-</td> <td>-</td> </tr> <tr> <td>Other</td> <td>-</td> <td>-</td> </tr> </table> <p>Population: General</p> | N                   |                                                                                                                                                                                                                                                                                                                                                 | 1769 | Age                                                | Age group 80-89 %     | 27                                                                                                                                                            | Gender                                                                                                     | Female %               | 63 | Ethnicity      | White British | 29 | Living arrangement | - | - | Employment status | -         | -  | Other | -                | -  | <p>Primary care</p> <p>Country: UK (Bristol, South West England)</p> | <table border="1" data-bbox="1308 226 2228 1087"> <tr> <td>Name</td> <td>Bristol Ageing Better Community Navigators Service</td> </tr> <tr> <td>Why</td> <td>Improve confidence, boost wellbeing and tackle loneliness &amp; isolation</td> </tr> <tr> <td>What</td> <td>Referral, initial contact within 5 days. Initial signposting and letter sent where necessary. Coordinator enters details onto Lamplight and informs Navigator of new referral. Navigator contacts client when ready to open case and assesses whether home visit is required. Either simple signposting and 6 month follow-up phone call or Navigator completes risk assessment over the phone if not already complete. Navigator/ Volunteer conducts first home visit and completes Initial Assessment and Form of Authority. BAB forms left with client where appropriate. Referrals made to local services/groups/ organisation. Further home visits, BAB forms collected and signposting conducted. Assistes signposting if needed. Follow-up after 6 months via telephone + interims Feedback form</td> </tr> <tr> <td>Who provided</td> <td>Delivered by two lead delivery agencies (North Bristol Advice Centre and Bristol Community Health), in partnership with 7 other local organisations, navigators (volunteer or employed): person-centred approach,use of high level communication skills, empathy and patience, appropriate and motivational training is very important, as well as adequate support,reflective practice and debriefing, wide knowledge base and the ability to source up-to-date information about local activities, groups,entitlements and specific agencies, highly skilled in assessing the appropriateness for the service, the level of support needed and whether a referral to another agency is required in order to resolve a particular barrier first before a home visit occurs.</td> </tr> <tr> <td>How</td> <td>Face-to-face, telephone</td> </tr> <tr> <td>Where</td> <td>Remote, home visit</td> </tr> <tr> <td>When and How Much</td> <td>Depending on the needs</td> </tr> <tr> <td>Tailoring</td> <td>Holistic and individual</td> </tr> </table> <p>Intervention: Holistic</p> | Name | Bristol Ageing Better Community Navigators Service | Why | Improve confidence, boost wellbeing and tackle loneliness & isolation                                                                                                                                                                 | What | Referral, initial contact within 5 days. Initial signposting and letter sent where necessary. Coordinator enters details onto Lamplight and informs Navigator of new referral. Navigator contacts client when ready to open case and assesses whether home visit is required. Either simple signposting and 6 month follow-up phone call or Navigator completes risk assessment over the phone if not already complete. Navigator/ Volunteer conducts first home visit and completes Initial Assessment and Form of Authority. BAB forms left with client where appropriate. Referrals made to local services/groups/ organisation. Further home visits, BAB forms collected and signposting conducted. Assistes signposting if needed. Follow-up after 6 months via telephone + interims Feedback form | Who provided | Delivered by two lead delivery agencies (North Bristol Advice Centre and Bristol Community Health), in partnership with 7 other local organisations, navigators (volunteer or employed): person-centred approach,use of high level communication skills, empathy and patience, appropriate and motivational training is very important, as well as adequate support,reflective practice and debriefing, wide knowledge base and the ability to source up-to-date information about local activities, groups,entitlements and specific agencies, highly skilled in assessing the appropriateness for the service, the level of support needed and whether a referral to another agency is required in order to resolve a particular barrier first before a home visit occurs. | How | Face-to-face, telephone | Where | Remote, home visit | When and How Much | Depending on the needs                                                | Tailoring | Holistic and individual | <p>Patient outcomes at baseline and 6 months follow-up via questionnaire:</p> <ul style="list-style-type: none"> <li>- De Jong Gierveld Loneliness Scale</li> <li>- UCLA Loneliness Scale</li> <li>- Short Warwick Edinburgh Mental Wellbeing Scale (SWEMWBS)</li> <li>- EQ5D-Index, EQVAS</li> <li>- Social participation, Volunteering (7 questions)</li> </ul>                                                                                                                                                                                                                                                        | <p>Peer Review: No</p> <p>Funding source: The National Lottery Community Fund Bristol Ageing Better (BAB)</p> <p>Declaration of interest: Not mentioned</p> |
| N                                      |                                                                                                                                                                                                                                                                                                                                                                                                                                                                                                                                                                                                                                                                                                                                                                                                         | 1769                                                                                                                                                                                                                                                                                                                                                                                                                                                                                                                                                                                                                                                                                                                                                                                                                                                                                                                                                                                                                                                                                                                                                     |                     |                                                                                                                                                                                                                                                                                                                                                 |      |                                                    |                       |                                                                                                                                                               |                                                                                                            |                        |    |                |               |    |                    |   |   |                   |           |    |       |                  |    |                                                                      |                                                                                                                                                                                                                                                                                                                                                                                                                                                                                                                                                                                                                                                                                                                                                                                                                                                                                                                                                                                                                                                                                                                                                                                                                                                                                                                                                                                                                                                                                                                                                                                                                                                                                                                                                                                                                                                                                                                                                                                                                                                                                                                                                                                                               |      |                                                    |     |                                                                                                                                                                                                                                       |      |                                                                                                                                                                                                                                                                                                                                                                                                                                                                                                                                                                                                                                                                                                                                                                                                         |              |                                                                                                                                                                                                                                                                                                                                                                                                                                                                                                                                                                                                                                                                                                                                                                              |     |                         |       |                    |                   |                                                                       |           |                         |                                                                                                                                                                                                                                                                                                                                                                                                                                                                                                                                                                                                                          |                                                                                                                                                             |
| Age                                    | Age group 80-89 %                                                                                                                                                                                                                                                                                                                                                                                                                                                                                                                                                                                                                                                                                                                                                                                       | 27                                                                                                                                                                                                                                                                                                                                                                                                                                                                                                                                                                                                                                                                                                                                                                                                                                                                                                                                                                                                                                                                                                                                                       |                     |                                                                                                                                                                                                                                                                                                                                                 |      |                                                    |                       |                                                                                                                                                               |                                                                                                            |                        |    |                |               |    |                    |   |   |                   |           |    |       |                  |    |                                                                      |                                                                                                                                                                                                                                                                                                                                                                                                                                                                                                                                                                                                                                                                                                                                                                                                                                                                                                                                                                                                                                                                                                                                                                                                                                                                                                                                                                                                                                                                                                                                                                                                                                                                                                                                                                                                                                                                                                                                                                                                                                                                                                                                                                                                               |      |                                                    |     |                                                                                                                                                                                                                                       |      |                                                                                                                                                                                                                                                                                                                                                                                                                                                                                                                                                                                                                                                                                                                                                                                                         |              |                                                                                                                                                                                                                                                                                                                                                                                                                                                                                                                                                                                                                                                                                                                                                                              |     |                         |       |                    |                   |                                                                       |           |                         |                                                                                                                                                                                                                                                                                                                                                                                                                                                                                                                                                                                                                          |                                                                                                                                                             |
| Gender                                 | Female %                                                                                                                                                                                                                                                                                                                                                                                                                                                                                                                                                                                                                                                                                                                                                                                                | 63                                                                                                                                                                                                                                                                                                                                                                                                                                                                                                                                                                                                                                                                                                                                                                                                                                                                                                                                                                                                                                                                                                                                                       |                     |                                                                                                                                                                                                                                                                                                                                                 |      |                                                    |                       |                                                                                                                                                               |                                                                                                            |                        |    |                |               |    |                    |   |   |                   |           |    |       |                  |    |                                                                      |                                                                                                                                                                                                                                                                                                                                                                                                                                                                                                                                                                                                                                                                                                                                                                                                                                                                                                                                                                                                                                                                                                                                                                                                                                                                                                                                                                                                                                                                                                                                                                                                                                                                                                                                                                                                                                                                                                                                                                                                                                                                                                                                                                                                               |      |                                                    |     |                                                                                                                                                                                                                                       |      |                                                                                                                                                                                                                                                                                                                                                                                                                                                                                                                                                                                                                                                                                                                                                                                                         |              |                                                                                                                                                                                                                                                                                                                                                                                                                                                                                                                                                                                                                                                                                                                                                                              |     |                         |       |                    |                   |                                                                       |           |                         |                                                                                                                                                                                                                                                                                                                                                                                                                                                                                                                                                                                                                          |                                                                                                                                                             |
| Ethnicity                              | White British                                                                                                                                                                                                                                                                                                                                                                                                                                                                                                                                                                                                                                                                                                                                                                                           | 29                                                                                                                                                                                                                                                                                                                                                                                                                                                                                                                                                                                                                                                                                                                                                                                                                                                                                                                                                                                                                                                                                                                                                       |                     |                                                                                                                                                                                                                                                                                                                                                 |      |                                                    |                       |                                                                                                                                                               |                                                                                                            |                        |    |                |               |    |                    |   |   |                   |           |    |       |                  |    |                                                                      |                                                                                                                                                                                                                                                                                                                                                                                                                                                                                                                                                                                                                                                                                                                                                                                                                                                                                                                                                                                                                                                                                                                                                                                                                                                                                                                                                                                                                                                                                                                                                                                                                                                                                                                                                                                                                                                                                                                                                                                                                                                                                                                                                                                                               |      |                                                    |     |                                                                                                                                                                                                                                       |      |                                                                                                                                                                                                                                                                                                                                                                                                                                                                                                                                                                                                                                                                                                                                                                                                         |              |                                                                                                                                                                                                                                                                                                                                                                                                                                                                                                                                                                                                                                                                                                                                                                              |     |                         |       |                    |                   |                                                                       |           |                         |                                                                                                                                                                                                                                                                                                                                                                                                                                                                                                                                                                                                                          |                                                                                                                                                             |
| Living arrangement                     | -                                                                                                                                                                                                                                                                                                                                                                                                                                                                                                                                                                                                                                                                                                                                                                                                       | -                                                                                                                                                                                                                                                                                                                                                                                                                                                                                                                                                                                                                                                                                                                                                                                                                                                                                                                                                                                                                                                                                                                                                        |                     |                                                                                                                                                                                                                                                                                                                                                 |      |                                                    |                       |                                                                                                                                                               |                                                                                                            |                        |    |                |               |    |                    |   |   |                   |           |    |       |                  |    |                                                                      |                                                                                                                                                                                                                                                                                                                                                                                                                                                                                                                                                                                                                                                                                                                                                                                                                                                                                                                                                                                                                                                                                                                                                                                                                                                                                                                                                                                                                                                                                                                                                                                                                                                                                                                                                                                                                                                                                                                                                                                                                                                                                                                                                                                                               |      |                                                    |     |                                                                                                                                                                                                                                       |      |                                                                                                                                                                                                                                                                                                                                                                                                                                                                                                                                                                                                                                                                                                                                                                                                         |              |                                                                                                                                                                                                                                                                                                                                                                                                                                                                                                                                                                                                                                                                                                                                                                              |     |                         |       |                    |                   |                                                                       |           |                         |                                                                                                                                                                                                                                                                                                                                                                                                                                                                                                                                                                                                                          |                                                                                                                                                             |
| Employment status                      | -                                                                                                                                                                                                                                                                                                                                                                                                                                                                                                                                                                                                                                                                                                                                                                                                       | -                                                                                                                                                                                                                                                                                                                                                                                                                                                                                                                                                                                                                                                                                                                                                                                                                                                                                                                                                                                                                                                                                                                                                        |                     |                                                                                                                                                                                                                                                                                                                                                 |      |                                                    |                       |                                                                                                                                                               |                                                                                                            |                        |    |                |               |    |                    |   |   |                   |           |    |       |                  |    |                                                                      |                                                                                                                                                                                                                                                                                                                                                                                                                                                                                                                                                                                                                                                                                                                                                                                                                                                                                                                                                                                                                                                                                                                                                                                                                                                                                                                                                                                                                                                                                                                                                                                                                                                                                                                                                                                                                                                                                                                                                                                                                                                                                                                                                                                                               |      |                                                    |     |                                                                                                                                                                                                                                       |      |                                                                                                                                                                                                                                                                                                                                                                                                                                                                                                                                                                                                                                                                                                                                                                                                         |              |                                                                                                                                                                                                                                                                                                                                                                                                                                                                                                                                                                                                                                                                                                                                                                              |     |                         |       |                    |                   |                                                                       |           |                         |                                                                                                                                                                                                                                                                                                                                                                                                                                                                                                                                                                                                                          |                                                                                                                                                             |
| Other                                  | -                                                                                                                                                                                                                                                                                                                                                                                                                                                                                                                                                                                                                                                                                                                                                                                                       | -                                                                                                                                                                                                                                                                                                                                                                                                                                                                                                                                                                                                                                                                                                                                                                                                                                                                                                                                                                                                                                                                                                                                                        |                     |                                                                                                                                                                                                                                                                                                                                                 |      |                                                    |                       |                                                                                                                                                               |                                                                                                            |                        |    |                |               |    |                    |   |   |                   |           |    |       |                  |    |                                                                      |                                                                                                                                                                                                                                                                                                                                                                                                                                                                                                                                                                                                                                                                                                                                                                                                                                                                                                                                                                                                                                                                                                                                                                                                                                                                                                                                                                                                                                                                                                                                                                                                                                                                                                                                                                                                                                                                                                                                                                                                                                                                                                                                                                                                               |      |                                                    |     |                                                                                                                                                                                                                                       |      |                                                                                                                                                                                                                                                                                                                                                                                                                                                                                                                                                                                                                                                                                                                                                                                                         |              |                                                                                                                                                                                                                                                                                                                                                                                                                                                                                                                                                                                                                                                                                                                                                                              |     |                         |       |                    |                   |                                                                       |           |                         |                                                                                                                                                                                                                                                                                                                                                                                                                                                                                                                                                                                                                          |                                                                                                                                                             |
| Name                                   | Bristol Ageing Better Community Navigators Service                                                                                                                                                                                                                                                                                                                                                                                                                                                                                                                                                                                                                                                                                                                                                      |                                                                                                                                                                                                                                                                                                                                                                                                                                                                                                                                                                                                                                                                                                                                                                                                                                                                                                                                                                                                                                                                                                                                                          |                     |                                                                                                                                                                                                                                                                                                                                                 |      |                                                    |                       |                                                                                                                                                               |                                                                                                            |                        |    |                |               |    |                    |   |   |                   |           |    |       |                  |    |                                                                      |                                                                                                                                                                                                                                                                                                                                                                                                                                                                                                                                                                                                                                                                                                                                                                                                                                                                                                                                                                                                                                                                                                                                                                                                                                                                                                                                                                                                                                                                                                                                                                                                                                                                                                                                                                                                                                                                                                                                                                                                                                                                                                                                                                                                               |      |                                                    |     |                                                                                                                                                                                                                                       |      |                                                                                                                                                                                                                                                                                                                                                                                                                                                                                                                                                                                                                                                                                                                                                                                                         |              |                                                                                                                                                                                                                                                                                                                                                                                                                                                                                                                                                                                                                                                                                                                                                                              |     |                         |       |                    |                   |                                                                       |           |                         |                                                                                                                                                                                                                                                                                                                                                                                                                                                                                                                                                                                                                          |                                                                                                                                                             |
| Why                                    | Improve confidence, boost wellbeing and tackle loneliness & isolation                                                                                                                                                                                                                                                                                                                                                                                                                                                                                                                                                                                                                                                                                                                                   |                                                                                                                                                                                                                                                                                                                                                                                                                                                                                                                                                                                                                                                                                                                                                                                                                                                                                                                                                                                                                                                                                                                                                          |                     |                                                                                                                                                                                                                                                                                                                                                 |      |                                                    |                       |                                                                                                                                                               |                                                                                                            |                        |    |                |               |    |                    |   |   |                   |           |    |       |                  |    |                                                                      |                                                                                                                                                                                                                                                                                                                                                                                                                                                                                                                                                                                                                                                                                                                                                                                                                                                                                                                                                                                                                                                                                                                                                                                                                                                                                                                                                                                                                                                                                                                                                                                                                                                                                                                                                                                                                                                                                                                                                                                                                                                                                                                                                                                                               |      |                                                    |     |                                                                                                                                                                                                                                       |      |                                                                                                                                                                                                                                                                                                                                                                                                                                                                                                                                                                                                                                                                                                                                                                                                         |              |                                                                                                                                                                                                                                                                                                                                                                                                                                                                                                                                                                                                                                                                                                                                                                              |     |                         |       |                    |                   |                                                                       |           |                         |                                                                                                                                                                                                                                                                                                                                                                                                                                                                                                                                                                                                                          |                                                                                                                                                             |
| What                                   | Referral, initial contact within 5 days. Initial signposting and letter sent where necessary. Coordinator enters details onto Lamplight and informs Navigator of new referral. Navigator contacts client when ready to open case and assesses whether home visit is required. Either simple signposting and 6 month follow-up phone call or Navigator completes risk assessment over the phone if not already complete. Navigator/ Volunteer conducts first home visit and completes Initial Assessment and Form of Authority. BAB forms left with client where appropriate. Referrals made to local services/groups/ organisation. Further home visits, BAB forms collected and signposting conducted. Assistes signposting if needed. Follow-up after 6 months via telephone + interims Feedback form |                                                                                                                                                                                                                                                                                                                                                                                                                                                                                                                                                                                                                                                                                                                                                                                                                                                                                                                                                                                                                                                                                                                                                          |                     |                                                                                                                                                                                                                                                                                                                                                 |      |                                                    |                       |                                                                                                                                                               |                                                                                                            |                        |    |                |               |    |                    |   |   |                   |           |    |       |                  |    |                                                                      |                                                                                                                                                                                                                                                                                                                                                                                                                                                                                                                                                                                                                                                                                                                                                                                                                                                                                                                                                                                                                                                                                                                                                                                                                                                                                                                                                                                                                                                                                                                                                                                                                                                                                                                                                                                                                                                                                                                                                                                                                                                                                                                                                                                                               |      |                                                    |     |                                                                                                                                                                                                                                       |      |                                                                                                                                                                                                                                                                                                                                                                                                                                                                                                                                                                                                                                                                                                                                                                                                         |              |                                                                                                                                                                                                                                                                                                                                                                                                                                                                                                                                                                                                                                                                                                                                                                              |     |                         |       |                    |                   |                                                                       |           |                         |                                                                                                                                                                                                                                                                                                                                                                                                                                                                                                                                                                                                                          |                                                                                                                                                             |
| Who provided                           | Delivered by two lead delivery agencies (North Bristol Advice Centre and Bristol Community Health), in partnership with 7 other local organisations, navigators (volunteer or employed): person-centred approach,use of high level communication skills, empathy and patience, appropriate and motivational training is very important, as well as adequate support,reflective practice and debriefing, wide knowledge base and the ability to source up-to-date information about local activities, groups,entitlements and specific agencies, highly skilled in assessing the appropriateness for the service, the level of support needed and whether a referral to another agency is required in order to resolve a particular barrier first before a home visit occurs.                            |                                                                                                                                                                                                                                                                                                                                                                                                                                                                                                                                                                                                                                                                                                                                                                                                                                                                                                                                                                                                                                                                                                                                                          |                     |                                                                                                                                                                                                                                                                                                                                                 |      |                                                    |                       |                                                                                                                                                               |                                                                                                            |                        |    |                |               |    |                    |   |   |                   |           |    |       |                  |    |                                                                      |                                                                                                                                                                                                                                                                                                                                                                                                                                                                                                                                                                                                                                                                                                                                                                                                                                                                                                                                                                                                                                                                                                                                                                                                                                                                                                                                                                                                                                                                                                                                                                                                                                                                                                                                                                                                                                                                                                                                                                                                                                                                                                                                                                                                               |      |                                                    |     |                                                                                                                                                                                                                                       |      |                                                                                                                                                                                                                                                                                                                                                                                                                                                                                                                                                                                                                                                                                                                                                                                                         |              |                                                                                                                                                                                                                                                                                                                                                                                                                                                                                                                                                                                                                                                                                                                                                                              |     |                         |       |                    |                   |                                                                       |           |                         |                                                                                                                                                                                                                                                                                                                                                                                                                                                                                                                                                                                                                          |                                                                                                                                                             |
| How                                    | Face-to-face, telephone                                                                                                                                                                                                                                                                                                                                                                                                                                                                                                                                                                                                                                                                                                                                                                                 |                                                                                                                                                                                                                                                                                                                                                                                                                                                                                                                                                                                                                                                                                                                                                                                                                                                                                                                                                                                                                                                                                                                                                          |                     |                                                                                                                                                                                                                                                                                                                                                 |      |                                                    |                       |                                                                                                                                                               |                                                                                                            |                        |    |                |               |    |                    |   |   |                   |           |    |       |                  |    |                                                                      |                                                                                                                                                                                                                                                                                                                                                                                                                                                                                                                                                                                                                                                                                                                                                                                                                                                                                                                                                                                                                                                                                                                                                                                                                                                                                                                                                                                                                                                                                                                                                                                                                                                                                                                                                                                                                                                                                                                                                                                                                                                                                                                                                                                                               |      |                                                    |     |                                                                                                                                                                                                                                       |      |                                                                                                                                                                                                                                                                                                                                                                                                                                                                                                                                                                                                                                                                                                                                                                                                         |              |                                                                                                                                                                                                                                                                                                                                                                                                                                                                                                                                                                                                                                                                                                                                                                              |     |                         |       |                    |                   |                                                                       |           |                         |                                                                                                                                                                                                                                                                                                                                                                                                                                                                                                                                                                                                                          |                                                                                                                                                             |
| Where                                  | Remote, home visit                                                                                                                                                                                                                                                                                                                                                                                                                                                                                                                                                                                                                                                                                                                                                                                      |                                                                                                                                                                                                                                                                                                                                                                                                                                                                                                                                                                                                                                                                                                                                                                                                                                                                                                                                                                                                                                                                                                                                                          |                     |                                                                                                                                                                                                                                                                                                                                                 |      |                                                    |                       |                                                                                                                                                               |                                                                                                            |                        |    |                |               |    |                    |   |   |                   |           |    |       |                  |    |                                                                      |                                                                                                                                                                                                                                                                                                                                                                                                                                                                                                                                                                                                                                                                                                                                                                                                                                                                                                                                                                                                                                                                                                                                                                                                                                                                                                                                                                                                                                                                                                                                                                                                                                                                                                                                                                                                                                                                                                                                                                                                                                                                                                                                                                                                               |      |                                                    |     |                                                                                                                                                                                                                                       |      |                                                                                                                                                                                                                                                                                                                                                                                                                                                                                                                                                                                                                                                                                                                                                                                                         |              |                                                                                                                                                                                                                                                                                                                                                                                                                                                                                                                                                                                                                                                                                                                                                                              |     |                         |       |                    |                   |                                                                       |           |                         |                                                                                                                                                                                                                                                                                                                                                                                                                                                                                                                                                                                                                          |                                                                                                                                                             |
| When and How Much                      | Depending on the needs                                                                                                                                                                                                                                                                                                                                                                                                                                                                                                                                                                                                                                                                                                                                                                                  |                                                                                                                                                                                                                                                                                                                                                                                                                                                                                                                                                                                                                                                                                                                                                                                                                                                                                                                                                                                                                                                                                                                                                          |                     |                                                                                                                                                                                                                                                                                                                                                 |      |                                                    |                       |                                                                                                                                                               |                                                                                                            |                        |    |                |               |    |                    |   |   |                   |           |    |       |                  |    |                                                                      |                                                                                                                                                                                                                                                                                                                                                                                                                                                                                                                                                                                                                                                                                                                                                                                                                                                                                                                                                                                                                                                                                                                                                                                                                                                                                                                                                                                                                                                                                                                                                                                                                                                                                                                                                                                                                                                                                                                                                                                                                                                                                                                                                                                                               |      |                                                    |     |                                                                                                                                                                                                                                       |      |                                                                                                                                                                                                                                                                                                                                                                                                                                                                                                                                                                                                                                                                                                                                                                                                         |              |                                                                                                                                                                                                                                                                                                                                                                                                                                                                                                                                                                                                                                                                                                                                                                              |     |                         |       |                    |                   |                                                                       |           |                         |                                                                                                                                                                                                                                                                                                                                                                                                                                                                                                                                                                                                                          |                                                                                                                                                             |
| Tailoring                              | Holistic and individual                                                                                                                                                                                                                                                                                                                                                                                                                                                                                                                                                                                                                                                                                                                                                                                 |                                                                                                                                                                                                                                                                                                                                                                                                                                                                                                                                                                                                                                                                                                                                                                                                                                                                                                                                                                                                                                                                                                                                                          |                     |                                                                                                                                                                                                                                                                                                                                                 |      |                                                    |                       |                                                                                                                                                               |                                                                                                            |                        |    |                |               |    |                    |   |   |                   |           |    |       |                  |    |                                                                      |                                                                                                                                                                                                                                                                                                                                                                                                                                                                                                                                                                                                                                                                                                                                                                                                                                                                                                                                                                                                                                                                                                                                                                                                                                                                                                                                                                                                                                                                                                                                                                                                                                                                                                                                                                                                                                                                                                                                                                                                                                                                                                                                                                                                               |      |                                                    |     |                                                                                                                                                                                                                                       |      |                                                                                                                                                                                                                                                                                                                                                                                                                                                                                                                                                                                                                                                                                                                                                                                                         |              |                                                                                                                                                                                                                                                                                                                                                                                                                                                                                                                                                                                                                                                                                                                                                                              |     |                         |       |                    |                   |                                                                       |           |                         |                                                                                                                                                                                                                                                                                                                                                                                                                                                                                                                                                                                                                          |                                                                                                                                                             |
| <p>Brandling 2011 (16)</p>             | <p>Uncontrolled before-and-after study, mixed-methods</p> <p>Study length: 17 months</p>                                                                                                                                                                                                                                                                                                                                                                                                                                                                                                                                                                                                                                                                                                                | <p><b>Inclusion criteria:</b> -</p> <p><b>Exclusion criteria:</b> -</p> <p>Baseline characteristics:</p> <table border="1" data-bbox="477 1272 1071 1619"> <tr> <td>N</td> <td></td> <td>90</td> </tr> <tr> <td>Age</td> <td>Between 40-70 years %</td> <td>42</td> </tr> <tr> <td>Gender</td> <td>Female %</td> <td>76</td> </tr> <tr> <td>Ethnicity n=68</td> <td>White british</td> <td>68</td> </tr> <tr> <td>Living arrangement</td> <td>-</td> <td>-</td> </tr> <tr> <td>Employment status</td> <td>Unknown n</td> <td>72</td> </tr> <tr> <td>other</td> <td>Disability yes %</td> <td>36</td> </tr> </table> <p>Population: Unclear</p>                                                                                                                                                                                                                                                                                                                                                                                                                                                                                                           | N                   |                                                                                                                                                                                                                                                                                                                                                 | 90   | Age                                                | Between 40-70 years % | 42                                                                                                                                                            | Gender                                                                                                     | Female %               | 76 | Ethnicity n=68 | White british | 68 | Living arrangement | - | - | Employment status | Unknown n | 72 | other | Disability yes % | 36 | <p>Primary care</p> <p>Country: UK</p>                               | <table border="1" data-bbox="1308 1188 2228 1675"> <tr> <td>Name</td> <td>New routes</td> </tr> <tr> <td>Why</td> <td>Make links between health services and more social opportunities in local communities with a view to benefiting patients, helping patients to make sense of the broad array of support and interest groups available in the community</td> </tr> <tr> <td>What</td> <td>Health professionals refer patients who wish to enhance their engagement in support and interest groups available in the community</td> </tr> <tr> <td>Who provided</td> <td>Co-ordinators, The Care Forum, service commissioners</td> </tr> <tr> <td>How</td> <td>Face-to-face</td> </tr> <tr> <td>Where</td> <td>-</td> </tr> <tr> <td>When and How Much</td> <td>First appointment lasts one hour, three to five meetings with patient</td> </tr> <tr> <td>Tailoring</td> <td>Personalized</td> </tr> </table> <p>Intervention: Medium</p>                                                                                                                                                                                                                                                                                                                                                                                                                                                                                                                                                                                                                                                                                                                                                                                                                                                                                                                                                                                                                                                                                                                                                                                                                                                                   | Name | New routes                                         | Why | Make links between health services and more social opportunities in local communities with a view to benefiting patients, helping patients to make sense of the broad array of support and interest groups available in the community | What | Health professionals refer patients who wish to enhance their engagement in support and interest groups available in the community                                                                                                                                                                                                                                                                                                                                                                                                                                                                                                                                                                                                                                                                      | Who provided | Co-ordinators, The Care Forum, service commissioners                                                                                                                                                                                                                                                                                                                                                                                                                                                                                                                                                                                                                                                                                                                         | How | Face-to-face            | Where | -                  | When and How Much | First appointment lasts one hour, three to five meetings with patient | Tailoring | Personalized            | <p>Patient outcomes at baseline (pre intervention) and 6-12-weeks follow-up via questionnaire (postal):</p> <ul style="list-style-type: none"> <li>- Warwick Edinburgh Mental Wellbeing Scale (WEMWBS)</li> <li>- Adapted Measure Yourself Medical Outcome Profile (MYMOP)</li> </ul> <p>Process of care measures at baseline (12 months before) and 6 months after via staff at surgery from patient records:</p> <ul style="list-style-type: none"> <li>- referrals to secondary health care</li> <li>- letters to secondary care</li> <li>- GP/nurse practitioner appointments</li> <li>- diagnostic tests</li> </ul> | <p>Peer Review: no</p> <p>Funding source: Bath and North East Somerset Council</p> <p>Declaration of interest: Not mentioned</p>                            |
| N                                      |                                                                                                                                                                                                                                                                                                                                                                                                                                                                                                                                                                                                                                                                                                                                                                                                         | 90                                                                                                                                                                                                                                                                                                                                                                                                                                                                                                                                                                                                                                                                                                                                                                                                                                                                                                                                                                                                                                                                                                                                                       |                     |                                                                                                                                                                                                                                                                                                                                                 |      |                                                    |                       |                                                                                                                                                               |                                                                                                            |                        |    |                |               |    |                    |   |   |                   |           |    |       |                  |    |                                                                      |                                                                                                                                                                                                                                                                                                                                                                                                                                                                                                                                                                                                                                                                                                                                                                                                                                                                                                                                                                                                                                                                                                                                                                                                                                                                                                                                                                                                                                                                                                                                                                                                                                                                                                                                                                                                                                                                                                                                                                                                                                                                                                                                                                                                               |      |                                                    |     |                                                                                                                                                                                                                                       |      |                                                                                                                                                                                                                                                                                                                                                                                                                                                                                                                                                                                                                                                                                                                                                                                                         |              |                                                                                                                                                                                                                                                                                                                                                                                                                                                                                                                                                                                                                                                                                                                                                                              |     |                         |       |                    |                   |                                                                       |           |                         |                                                                                                                                                                                                                                                                                                                                                                                                                                                                                                                                                                                                                          |                                                                                                                                                             |
| Age                                    | Between 40-70 years %                                                                                                                                                                                                                                                                                                                                                                                                                                                                                                                                                                                                                                                                                                                                                                                   | 42                                                                                                                                                                                                                                                                                                                                                                                                                                                                                                                                                                                                                                                                                                                                                                                                                                                                                                                                                                                                                                                                                                                                                       |                     |                                                                                                                                                                                                                                                                                                                                                 |      |                                                    |                       |                                                                                                                                                               |                                                                                                            |                        |    |                |               |    |                    |   |   |                   |           |    |       |                  |    |                                                                      |                                                                                                                                                                                                                                                                                                                                                                                                                                                                                                                                                                                                                                                                                                                                                                                                                                                                                                                                                                                                                                                                                                                                                                                                                                                                                                                                                                                                                                                                                                                                                                                                                                                                                                                                                                                                                                                                                                                                                                                                                                                                                                                                                                                                               |      |                                                    |     |                                                                                                                                                                                                                                       |      |                                                                                                                                                                                                                                                                                                                                                                                                                                                                                                                                                                                                                                                                                                                                                                                                         |              |                                                                                                                                                                                                                                                                                                                                                                                                                                                                                                                                                                                                                                                                                                                                                                              |     |                         |       |                    |                   |                                                                       |           |                         |                                                                                                                                                                                                                                                                                                                                                                                                                                                                                                                                                                                                                          |                                                                                                                                                             |
| Gender                                 | Female %                                                                                                                                                                                                                                                                                                                                                                                                                                                                                                                                                                                                                                                                                                                                                                                                | 76                                                                                                                                                                                                                                                                                                                                                                                                                                                                                                                                                                                                                                                                                                                                                                                                                                                                                                                                                                                                                                                                                                                                                       |                     |                                                                                                                                                                                                                                                                                                                                                 |      |                                                    |                       |                                                                                                                                                               |                                                                                                            |                        |    |                |               |    |                    |   |   |                   |           |    |       |                  |    |                                                                      |                                                                                                                                                                                                                                                                                                                                                                                                                                                                                                                                                                                                                                                                                                                                                                                                                                                                                                                                                                                                                                                                                                                                                                                                                                                                                                                                                                                                                                                                                                                                                                                                                                                                                                                                                                                                                                                                                                                                                                                                                                                                                                                                                                                                               |      |                                                    |     |                                                                                                                                                                                                                                       |      |                                                                                                                                                                                                                                                                                                                                                                                                                                                                                                                                                                                                                                                                                                                                                                                                         |              |                                                                                                                                                                                                                                                                                                                                                                                                                                                                                                                                                                                                                                                                                                                                                                              |     |                         |       |                    |                   |                                                                       |           |                         |                                                                                                                                                                                                                                                                                                                                                                                                                                                                                                                                                                                                                          |                                                                                                                                                             |
| Ethnicity n=68                         | White british                                                                                                                                                                                                                                                                                                                                                                                                                                                                                                                                                                                                                                                                                                                                                                                           | 68                                                                                                                                                                                                                                                                                                                                                                                                                                                                                                                                                                                                                                                                                                                                                                                                                                                                                                                                                                                                                                                                                                                                                       |                     |                                                                                                                                                                                                                                                                                                                                                 |      |                                                    |                       |                                                                                                                                                               |                                                                                                            |                        |    |                |               |    |                    |   |   |                   |           |    |       |                  |    |                                                                      |                                                                                                                                                                                                                                                                                                                                                                                                                                                                                                                                                                                                                                                                                                                                                                                                                                                                                                                                                                                                                                                                                                                                                                                                                                                                                                                                                                                                                                                                                                                                                                                                                                                                                                                                                                                                                                                                                                                                                                                                                                                                                                                                                                                                               |      |                                                    |     |                                                                                                                                                                                                                                       |      |                                                                                                                                                                                                                                                                                                                                                                                                                                                                                                                                                                                                                                                                                                                                                                                                         |              |                                                                                                                                                                                                                                                                                                                                                                                                                                                                                                                                                                                                                                                                                                                                                                              |     |                         |       |                    |                   |                                                                       |           |                         |                                                                                                                                                                                                                                                                                                                                                                                                                                                                                                                                                                                                                          |                                                                                                                                                             |
| Living arrangement                     | -                                                                                                                                                                                                                                                                                                                                                                                                                                                                                                                                                                                                                                                                                                                                                                                                       | -                                                                                                                                                                                                                                                                                                                                                                                                                                                                                                                                                                                                                                                                                                                                                                                                                                                                                                                                                                                                                                                                                                                                                        |                     |                                                                                                                                                                                                                                                                                                                                                 |      |                                                    |                       |                                                                                                                                                               |                                                                                                            |                        |    |                |               |    |                    |   |   |                   |           |    |       |                  |    |                                                                      |                                                                                                                                                                                                                                                                                                                                                                                                                                                                                                                                                                                                                                                                                                                                                                                                                                                                                                                                                                                                                                                                                                                                                                                                                                                                                                                                                                                                                                                                                                                                                                                                                                                                                                                                                                                                                                                                                                                                                                                                                                                                                                                                                                                                               |      |                                                    |     |                                                                                                                                                                                                                                       |      |                                                                                                                                                                                                                                                                                                                                                                                                                                                                                                                                                                                                                                                                                                                                                                                                         |              |                                                                                                                                                                                                                                                                                                                                                                                                                                                                                                                                                                                                                                                                                                                                                                              |     |                         |       |                    |                   |                                                                       |           |                         |                                                                                                                                                                                                                                                                                                                                                                                                                                                                                                                                                                                                                          |                                                                                                                                                             |
| Employment status                      | Unknown n                                                                                                                                                                                                                                                                                                                                                                                                                                                                                                                                                                                                                                                                                                                                                                                               | 72                                                                                                                                                                                                                                                                                                                                                                                                                                                                                                                                                                                                                                                                                                                                                                                                                                                                                                                                                                                                                                                                                                                                                       |                     |                                                                                                                                                                                                                                                                                                                                                 |      |                                                    |                       |                                                                                                                                                               |                                                                                                            |                        |    |                |               |    |                    |   |   |                   |           |    |       |                  |    |                                                                      |                                                                                                                                                                                                                                                                                                                                                                                                                                                                                                                                                                                                                                                                                                                                                                                                                                                                                                                                                                                                                                                                                                                                                                                                                                                                                                                                                                                                                                                                                                                                                                                                                                                                                                                                                                                                                                                                                                                                                                                                                                                                                                                                                                                                               |      |                                                    |     |                                                                                                                                                                                                                                       |      |                                                                                                                                                                                                                                                                                                                                                                                                                                                                                                                                                                                                                                                                                                                                                                                                         |              |                                                                                                                                                                                                                                                                                                                                                                                                                                                                                                                                                                                                                                                                                                                                                                              |     |                         |       |                    |                   |                                                                       |           |                         |                                                                                                                                                                                                                                                                                                                                                                                                                                                                                                                                                                                                                          |                                                                                                                                                             |
| other                                  | Disability yes %                                                                                                                                                                                                                                                                                                                                                                                                                                                                                                                                                                                                                                                                                                                                                                                        | 36                                                                                                                                                                                                                                                                                                                                                                                                                                                                                                                                                                                                                                                                                                                                                                                                                                                                                                                                                                                                                                                                                                                                                       |                     |                                                                                                                                                                                                                                                                                                                                                 |      |                                                    |                       |                                                                                                                                                               |                                                                                                            |                        |    |                |               |    |                    |   |   |                   |           |    |       |                  |    |                                                                      |                                                                                                                                                                                                                                                                                                                                                                                                                                                                                                                                                                                                                                                                                                                                                                                                                                                                                                                                                                                                                                                                                                                                                                                                                                                                                                                                                                                                                                                                                                                                                                                                                                                                                                                                                                                                                                                                                                                                                                                                                                                                                                                                                                                                               |      |                                                    |     |                                                                                                                                                                                                                                       |      |                                                                                                                                                                                                                                                                                                                                                                                                                                                                                                                                                                                                                                                                                                                                                                                                         |              |                                                                                                                                                                                                                                                                                                                                                                                                                                                                                                                                                                                                                                                                                                                                                                              |     |                         |       |                    |                   |                                                                       |           |                         |                                                                                                                                                                                                                                                                                                                                                                                                                                                                                                                                                                                                                          |                                                                                                                                                             |
| Name                                   | New routes                                                                                                                                                                                                                                                                                                                                                                                                                                                                                                                                                                                                                                                                                                                                                                                              |                                                                                                                                                                                                                                                                                                                                                                                                                                                                                                                                                                                                                                                                                                                                                                                                                                                                                                                                                                                                                                                                                                                                                          |                     |                                                                                                                                                                                                                                                                                                                                                 |      |                                                    |                       |                                                                                                                                                               |                                                                                                            |                        |    |                |               |    |                    |   |   |                   |           |    |       |                  |    |                                                                      |                                                                                                                                                                                                                                                                                                                                                                                                                                                                                                                                                                                                                                                                                                                                                                                                                                                                                                                                                                                                                                                                                                                                                                                                                                                                                                                                                                                                                                                                                                                                                                                                                                                                                                                                                                                                                                                                                                                                                                                                                                                                                                                                                                                                               |      |                                                    |     |                                                                                                                                                                                                                                       |      |                                                                                                                                                                                                                                                                                                                                                                                                                                                                                                                                                                                                                                                                                                                                                                                                         |              |                                                                                                                                                                                                                                                                                                                                                                                                                                                                                                                                                                                                                                                                                                                                                                              |     |                         |       |                    |                   |                                                                       |           |                         |                                                                                                                                                                                                                                                                                                                                                                                                                                                                                                                                                                                                                          |                                                                                                                                                             |
| Why                                    | Make links between health services and more social opportunities in local communities with a view to benefiting patients, helping patients to make sense of the broad array of support and interest groups available in the community                                                                                                                                                                                                                                                                                                                                                                                                                                                                                                                                                                   |                                                                                                                                                                                                                                                                                                                                                                                                                                                                                                                                                                                                                                                                                                                                                                                                                                                                                                                                                                                                                                                                                                                                                          |                     |                                                                                                                                                                                                                                                                                                                                                 |      |                                                    |                       |                                                                                                                                                               |                                                                                                            |                        |    |                |               |    |                    |   |   |                   |           |    |       |                  |    |                                                                      |                                                                                                                                                                                                                                                                                                                                                                                                                                                                                                                                                                                                                                                                                                                                                                                                                                                                                                                                                                                                                                                                                                                                                                                                                                                                                                                                                                                                                                                                                                                                                                                                                                                                                                                                                                                                                                                                                                                                                                                                                                                                                                                                                                                                               |      |                                                    |     |                                                                                                                                                                                                                                       |      |                                                                                                                                                                                                                                                                                                                                                                                                                                                                                                                                                                                                                                                                                                                                                                                                         |              |                                                                                                                                                                                                                                                                                                                                                                                                                                                                                                                                                                                                                                                                                                                                                                              |     |                         |       |                    |                   |                                                                       |           |                         |                                                                                                                                                                                                                                                                                                                                                                                                                                                                                                                                                                                                                          |                                                                                                                                                             |
| What                                   | Health professionals refer patients who wish to enhance their engagement in support and interest groups available in the community                                                                                                                                                                                                                                                                                                                                                                                                                                                                                                                                                                                                                                                                      |                                                                                                                                                                                                                                                                                                                                                                                                                                                                                                                                                                                                                                                                                                                                                                                                                                                                                                                                                                                                                                                                                                                                                          |                     |                                                                                                                                                                                                                                                                                                                                                 |      |                                                    |                       |                                                                                                                                                               |                                                                                                            |                        |    |                |               |    |                    |   |   |                   |           |    |       |                  |    |                                                                      |                                                                                                                                                                                                                                                                                                                                                                                                                                                                                                                                                                                                                                                                                                                                                                                                                                                                                                                                                                                                                                                                                                                                                                                                                                                                                                                                                                                                                                                                                                                                                                                                                                                                                                                                                                                                                                                                                                                                                                                                                                                                                                                                                                                                               |      |                                                    |     |                                                                                                                                                                                                                                       |      |                                                                                                                                                                                                                                                                                                                                                                                                                                                                                                                                                                                                                                                                                                                                                                                                         |              |                                                                                                                                                                                                                                                                                                                                                                                                                                                                                                                                                                                                                                                                                                                                                                              |     |                         |       |                    |                   |                                                                       |           |                         |                                                                                                                                                                                                                                                                                                                                                                                                                                                                                                                                                                                                                          |                                                                                                                                                             |
| Who provided                           | Co-ordinators, The Care Forum, service commissioners                                                                                                                                                                                                                                                                                                                                                                                                                                                                                                                                                                                                                                                                                                                                                    |                                                                                                                                                                                                                                                                                                                                                                                                                                                                                                                                                                                                                                                                                                                                                                                                                                                                                                                                                                                                                                                                                                                                                          |                     |                                                                                                                                                                                                                                                                                                                                                 |      |                                                    |                       |                                                                                                                                                               |                                                                                                            |                        |    |                |               |    |                    |   |   |                   |           |    |       |                  |    |                                                                      |                                                                                                                                                                                                                                                                                                                                                                                                                                                                                                                                                                                                                                                                                                                                                                                                                                                                                                                                                                                                                                                                                                                                                                                                                                                                                                                                                                                                                                                                                                                                                                                                                                                                                                                                                                                                                                                                                                                                                                                                                                                                                                                                                                                                               |      |                                                    |     |                                                                                                                                                                                                                                       |      |                                                                                                                                                                                                                                                                                                                                                                                                                                                                                                                                                                                                                                                                                                                                                                                                         |              |                                                                                                                                                                                                                                                                                                                                                                                                                                                                                                                                                                                                                                                                                                                                                                              |     |                         |       |                    |                   |                                                                       |           |                         |                                                                                                                                                                                                                                                                                                                                                                                                                                                                                                                                                                                                                          |                                                                                                                                                             |
| How                                    | Face-to-face                                                                                                                                                                                                                                                                                                                                                                                                                                                                                                                                                                                                                                                                                                                                                                                            |                                                                                                                                                                                                                                                                                                                                                                                                                                                                                                                                                                                                                                                                                                                                                                                                                                                                                                                                                                                                                                                                                                                                                          |                     |                                                                                                                                                                                                                                                                                                                                                 |      |                                                    |                       |                                                                                                                                                               |                                                                                                            |                        |    |                |               |    |                    |   |   |                   |           |    |       |                  |    |                                                                      |                                                                                                                                                                                                                                                                                                                                                                                                                                                                                                                                                                                                                                                                                                                                                                                                                                                                                                                                                                                                                                                                                                                                                                                                                                                                                                                                                                                                                                                                                                                                                                                                                                                                                                                                                                                                                                                                                                                                                                                                                                                                                                                                                                                                               |      |                                                    |     |                                                                                                                                                                                                                                       |      |                                                                                                                                                                                                                                                                                                                                                                                                                                                                                                                                                                                                                                                                                                                                                                                                         |              |                                                                                                                                                                                                                                                                                                                                                                                                                                                                                                                                                                                                                                                                                                                                                                              |     |                         |       |                    |                   |                                                                       |           |                         |                                                                                                                                                                                                                                                                                                                                                                                                                                                                                                                                                                                                                          |                                                                                                                                                             |
| Where                                  | -                                                                                                                                                                                                                                                                                                                                                                                                                                                                                                                                                                                                                                                                                                                                                                                                       |                                                                                                                                                                                                                                                                                                                                                                                                                                                                                                                                                                                                                                                                                                                                                                                                                                                                                                                                                                                                                                                                                                                                                          |                     |                                                                                                                                                                                                                                                                                                                                                 |      |                                                    |                       |                                                                                                                                                               |                                                                                                            |                        |    |                |               |    |                    |   |   |                   |           |    |       |                  |    |                                                                      |                                                                                                                                                                                                                                                                                                                                                                                                                                                                                                                                                                                                                                                                                                                                                                                                                                                                                                                                                                                                                                                                                                                                                                                                                                                                                                                                                                                                                                                                                                                                                                                                                                                                                                                                                                                                                                                                                                                                                                                                                                                                                                                                                                                                               |      |                                                    |     |                                                                                                                                                                                                                                       |      |                                                                                                                                                                                                                                                                                                                                                                                                                                                                                                                                                                                                                                                                                                                                                                                                         |              |                                                                                                                                                                                                                                                                                                                                                                                                                                                                                                                                                                                                                                                                                                                                                                              |     |                         |       |                    |                   |                                                                       |           |                         |                                                                                                                                                                                                                                                                                                                                                                                                                                                                                                                                                                                                                          |                                                                                                                                                             |
| When and How Much                      | First appointment lasts one hour, three to five meetings with patient                                                                                                                                                                                                                                                                                                                                                                                                                                                                                                                                                                                                                                                                                                                                   |                                                                                                                                                                                                                                                                                                                                                                                                                                                                                                                                                                                                                                                                                                                                                                                                                                                                                                                                                                                                                                                                                                                                                          |                     |                                                                                                                                                                                                                                                                                                                                                 |      |                                                    |                       |                                                                                                                                                               |                                                                                                            |                        |    |                |               |    |                    |   |   |                   |           |    |       |                  |    |                                                                      |                                                                                                                                                                                                                                                                                                                                                                                                                                                                                                                                                                                                                                                                                                                                                                                                                                                                                                                                                                                                                                                                                                                                                                                                                                                                                                                                                                                                                                                                                                                                                                                                                                                                                                                                                                                                                                                                                                                                                                                                                                                                                                                                                                                                               |      |                                                    |     |                                                                                                                                                                                                                                       |      |                                                                                                                                                                                                                                                                                                                                                                                                                                                                                                                                                                                                                                                                                                                                                                                                         |              |                                                                                                                                                                                                                                                                                                                                                                                                                                                                                                                                                                                                                                                                                                                                                                              |     |                         |       |                    |                   |                                                                       |           |                         |                                                                                                                                                                                                                                                                                                                                                                                                                                                                                                                                                                                                                          |                                                                                                                                                             |
| Tailoring                              | Personalized                                                                                                                                                                                                                                                                                                                                                                                                                                                                                                                                                                                                                                                                                                                                                                                            |                                                                                                                                                                                                                                                                                                                                                                                                                                                                                                                                                                                                                                                                                                                                                                                                                                                                                                                                                                                                                                                                                                                                                          |                     |                                                                                                                                                                                                                                                                                                                                                 |      |                                                    |                       |                                                                                                                                                               |                                                                                                            |                        |    |                |               |    |                    |   |   |                   |           |    |       |                  |    |                                                                      |                                                                                                                                                                                                                                                                                                                                                                                                                                                                                                                                                                                                                                                                                                                                                                                                                                                                                                                                                                                                                                                                                                                                                                                                                                                                                                                                                                                                                                                                                                                                                                                                                                                                                                                                                                                                                                                                                                                                                                                                                                                                                                                                                                                                               |      |                                                    |     |                                                                                                                                                                                                                                       |      |                                                                                                                                                                                                                                                                                                                                                                                                                                                                                                                                                                                                                                                                                                                                                                                                         |              |                                                                                                                                                                                                                                                                                                                                                                                                                                                                                                                                                                                                                                                                                                                                                                              |     |                         |       |                    |                   |                                                                       |           |                         |                                                                                                                                                                                                                                                                                                                                                                                                                                                                                                                                                                                                                          |                                                                                                                                                             |
| <p>Bromley by Bow Centre 2019 (46)</p> | <p>Uncontrolled before-and-after study, mixed</p>                                                                                                                                                                                                                                                                                                                                                                                                                                                                                                                                                                                                                                                                                                                                                       | <p><b>Inclusion criteria:</b> -</p> <p><b>Exclusion criteria:</b> -</p>                                                                                                                                                                                                                                                                                                                                                                                                                                                                                                                                                                                                                                                                                                                                                                                                                                                                                                                                                                                                                                                                                  | <p>Primary Care</p> | <table border="1" data-bbox="1308 1818 2228 1906"> <tr> <td>Name</td> <td>Bromley by Bow Centre's Social Prescribing service</td> </tr> <tr> <td>Why</td> <td>To respond to the high levels of health inequality and deprivation in the local community, aims to support people with non-medical needs and address problems</td> </tr> </table> | Name | Bromley by Bow Centre's Social Prescribing service | Why                   | To respond to the high levels of health inequality and deprivation in the local community, aims to support people with non-medical needs and address problems | <p>Patient outcomes at Baseline usually during a Level 2 intervention and 12 weeks/end of intervention</p> | <p>Peer-Review: No</p> |    |                |               |    |                    |   |   |                   |           |    |       |                  |    |                                                                      |                                                                                                                                                                                                                                                                                                                                                                                                                                                                                                                                                                                                                                                                                                                                                                                                                                                                                                                                                                                                                                                                                                                                                                                                                                                                                                                                                                                                                                                                                                                                                                                                                                                                                                                                                                                                                                                                                                                                                                                                                                                                                                                                                                                                               |      |                                                    |     |                                                                                                                                                                                                                                       |      |                                                                                                                                                                                                                                                                                                                                                                                                                                                                                                                                                                                                                                                                                                                                                                                                         |              |                                                                                                                                                                                                                                                                                                                                                                                                                                                                                                                                                                                                                                                                                                                                                                              |     |                         |       |                    |                   |                                                                       |           |                         |                                                                                                                                                                                                                                                                                                                                                                                                                                                                                                                                                                                                                          |                                                                                                                                                             |
| Name                                   | Bromley by Bow Centre's Social Prescribing service                                                                                                                                                                                                                                                                                                                                                                                                                                                                                                                                                                                                                                                                                                                                                      |                                                                                                                                                                                                                                                                                                                                                                                                                                                                                                                                                                                                                                                                                                                                                                                                                                                                                                                                                                                                                                                                                                                                                          |                     |                                                                                                                                                                                                                                                                                                                                                 |      |                                                    |                       |                                                                                                                                                               |                                                                                                            |                        |    |                |               |    |                    |   |   |                   |           |    |       |                  |    |                                                                      |                                                                                                                                                                                                                                                                                                                                                                                                                                                                                                                                                                                                                                                                                                                                                                                                                                                                                                                                                                                                                                                                                                                                                                                                                                                                                                                                                                                                                                                                                                                                                                                                                                                                                                                                                                                                                                                                                                                                                                                                                                                                                                                                                                                                               |      |                                                    |     |                                                                                                                                                                                                                                       |      |                                                                                                                                                                                                                                                                                                                                                                                                                                                                                                                                                                                                                                                                                                                                                                                                         |              |                                                                                                                                                                                                                                                                                                                                                                                                                                                                                                                                                                                                                                                                                                                                                                              |     |                         |       |                    |                   |                                                                       |           |                         |                                                                                                                                                                                                                                                                                                                                                                                                                                                                                                                                                                                                                          |                                                                                                                                                             |
| Why                                    | To respond to the high levels of health inequality and deprivation in the local community, aims to support people with non-medical needs and address problems                                                                                                                                                                                                                                                                                                                                                                                                                                                                                                                                                                                                                                           |                                                                                                                                                                                                                                                                                                                                                                                                                                                                                                                                                                                                                                                                                                                                                                                                                                                                                                                                                                                                                                                                                                                                                          |                     |                                                                                                                                                                                                                                                                                                                                                 |      |                                                    |                       |                                                                                                                                                               |                                                                                                            |                        |    |                |               |    |                    |   |   |                   |           |    |       |                  |    |                                                                      |                                                                                                                                                                                                                                                                                                                                                                                                                                                                                                                                                                                                                                                                                                                                                                                                                                                                                                                                                                                                                                                                                                                                                                                                                                                                                                                                                                                                                                                                                                                                                                                                                                                                                                                                                                                                                                                                                                                                                                                                                                                                                                                                                                                                               |      |                                                    |     |                                                                                                                                                                                                                                       |      |                                                                                                                                                                                                                                                                                                                                                                                                                                                                                                                                                                                                                                                                                                                                                                                                         |              |                                                                                                                                                                                                                                                                                                                                                                                                                                                                                                                                                                                                                                                                                                                                                                              |     |                         |       |                    |                   |                                                                       |           |                         |                                                                                                                                                                                                                                                                                                                                                                                                                                                                                                                                                                                                                          |                                                                                                                                                             |

|                     |                                                                                       |                                                                                                                                                                                                                                                                                                                                                                                                                                                                                                                                 |                            |                                                                                       |                                                    |     |                                                                  |                                                                                                                                    |     |                 |       |        |          |    |           |                 |   |                    |   |   |                   |   |   |       |                                                                                       |            |
|---------------------|---------------------------------------------------------------------------------------|---------------------------------------------------------------------------------------------------------------------------------------------------------------------------------------------------------------------------------------------------------------------------------------------------------------------------------------------------------------------------------------------------------------------------------------------------------------------------------------------------------------------------------|----------------------------|---------------------------------------------------------------------------------------|----------------------------------------------------|-----|------------------------------------------------------------------|------------------------------------------------------------------------------------------------------------------------------------|-----|-----------------|-------|--------|----------|----|-----------|-----------------|---|--------------------|---|---|-------------------|---|---|-------|---------------------------------------------------------------------------------------|------------|
| methods             | Baseline characteristics:                                                             |                                                                                                                                                                                                                                                                                                                                                                                                                                                                                                                                 |                            | Country:<br>UK (Bromley-by-Bow, London Borough of Tower Hamlets, East Greater London) | caused by the wider social determinants of health. |     | follow-up :<br>- Measure Yourself Concerns and Wellbeing (MYCaW) | Funding source:<br>Tower Hamlets GP Care Group (CIC), Mile End East & Bromley by Bow (MEEBBB) primary care network and Tudor Trust |     |                 |       |        |          |    |           |                 |   |                    |   |   |                   |   |   |       |                                                                                       |            |
|                     | Study length:<br>12 months                                                            | <table border="1"> <tr> <td>N</td> <td>583</td> </tr> <tr> <td>Age</td> <td>Modal age group</td> <td>31-40</td> </tr> <tr> <td>Gender</td> <td>Female %</td> <td>65</td> </tr> <tr> <td>Ethnicity</td> <td>White British %</td> <td>-</td> </tr> <tr> <td>Living arrangement</td> <td>-</td> <td>-</td> </tr> <tr> <td>Employment status</td> <td>-</td> <td>-</td> </tr> <tr> <td>Other</td> <td>Mean number of needs (most common: anxiety/stress/depression/low mood % of all needs)</td> <td>4.4 (18.4)</td> </tr> </table> |                            |                                                                                       | N                                                  | 583 |                                                                  |                                                                                                                                    | Age | Modal age group | 31-40 | Gender | Female % | 65 | Ethnicity | White British % | - | Living arrangement | - | - | Employment status | - | - | Other | Mean number of needs (most common: anxiety/stress/depression/low mood % of all needs) | 4.4 (18.4) |
| N                   | 583                                                                                   |                                                                                                                                                                                                                                                                                                                                                                                                                                                                                                                                 |                            |                                                                                       |                                                    |     |                                                                  |                                                                                                                                    |     |                 |       |        |          |    |           |                 |   |                    |   |   |                   |   |   |       |                                                                                       |            |
| Age                 | Modal age group                                                                       | 31-40                                                                                                                                                                                                                                                                                                                                                                                                                                                                                                                           |                            |                                                                                       |                                                    |     |                                                                  |                                                                                                                                    |     |                 |       |        |          |    |           |                 |   |                    |   |   |                   |   |   |       |                                                                                       |            |
| Gender              | Female %                                                                              | 65                                                                                                                                                                                                                                                                                                                                                                                                                                                                                                                              |                            |                                                                                       |                                                    |     |                                                                  |                                                                                                                                    |     |                 |       |        |          |    |           |                 |   |                    |   |   |                   |   |   |       |                                                                                       |            |
| Ethnicity           | White British %                                                                       | -                                                                                                                                                                                                                                                                                                                                                                                                                                                                                                                               |                            |                                                                                       |                                                    |     |                                                                  |                                                                                                                                    |     |                 |       |        |          |    |           |                 |   |                    |   |   |                   |   |   |       |                                                                                       |            |
| Living arrangement  | -                                                                                     | -                                                                                                                                                                                                                                                                                                                                                                                                                                                                                                                               |                            |                                                                                       |                                                    |     |                                                                  |                                                                                                                                    |     |                 |       |        |          |    |           |                 |   |                    |   |   |                   |   |   |       |                                                                                       |            |
| Employment status   | -                                                                                     | -                                                                                                                                                                                                                                                                                                                                                                                                                                                                                                                               |                            |                                                                                       |                                                    |     |                                                                  |                                                                                                                                    |     |                 |       |        |          |    |           |                 |   |                    |   |   |                   |   |   |       |                                                                                       |            |
| Other               | Mean number of needs (most common: anxiety/stress/depression/low mood % of all needs) | 4.4 (18.4)                                                                                                                                                                                                                                                                                                                                                                                                                                                                                                                      |                            |                                                                                       |                                                    |     |                                                                  |                                                                                                                                    |     |                 |       |        |          |    |           |                 |   |                    |   |   |                   |   |   |       |                                                                                       |            |
| Population: Unclear |                                                                                       |                                                                                                                                                                                                                                                                                                                                                                                                                                                                                                                                 | Who provided               | A service manager and two 0.4 FTE Social Prescribing Link Workers                     |                                                    |     |                                                                  |                                                                                                                                    |     |                 |       |        |          |    |           |                 |   |                    |   |   |                   |   |   |       |                                                                                       |            |
|                     |                                                                                       |                                                                                                                                                                                                                                                                                                                                                                                                                                                                                                                                 | How                        | Face-to-face, telephone                                                               |                                                    |     |                                                                  |                                                                                                                                    |     |                 |       |        |          |    |           |                 |   |                    |   |   |                   |   |   |       |                                                                                       |            |
|                     |                                                                                       |                                                                                                                                                                                                                                                                                                                                                                                                                                                                                                                                 | Where                      | -                                                                                     |                                                    |     |                                                                  |                                                                                                                                    |     |                 |       |        |          |    |           |                 |   |                    |   |   |                   |   |   |       |                                                                                       |            |
|                     |                                                                                       |                                                                                                                                                                                                                                                                                                                                                                                                                                                                                                                                 | When and How Much          | Up to six hour-long, one-to-one sessions                                              |                                                    |     |                                                                  |                                                                                                                                    |     |                 |       |        |          |    |           |                 |   |                    |   |   |                   |   |   |       |                                                                                       |            |
|                     |                                                                                       |                                                                                                                                                                                                                                                                                                                                                                                                                                                                                                                                 | Tailoring                  | Personalized                                                                          |                                                    |     |                                                                  |                                                                                                                                    |     |                 |       |        |          |    |           |                 |   |                    |   |   |                   |   |   |       |                                                                                       |            |
|                     |                                                                                       |                                                                                                                                                                                                                                                                                                                                                                                                                                                                                                                                 | Intervention: Light/Medium |                                                                                       |                                                    |     |                                                                  |                                                                                                                                    |     |                 |       |        |          |    |           |                 |   |                    |   |   |                   |   |   |       |                                                                                       |            |



|                     |                                                                                                                                                                                                                                                                                                                                                                                                                                                                                                                                                                                                                                                                                                                                  |                                                                                                                                                                                                                                                                                                                                                                                                                                                                                                                                                                                                                                                                                                                                                                                                                                                                                                                                                                                                                                                                                                                                                                                                                                                                                                                                                                                                     |                                                                                                                            |                                                                                                                                                                                                                                                                                                                                                                                                                                                                                                                                                                                                                                                                                                                                                                                                                                                                                                                                                                                 |     |     |      |    |        |                                  |                                                        |                                    |           |                                               |                    |   |      |                                                                                                                                                                                                                                                                                                                                  |                                                                   |                                                                                                                    |                                                                                                                                                                                                                                                                                                                                                                                                                                                                              |                                                                                                                                                                                |   |                                                                          |                                                                                                                                                                                                                                                                                                                                                                                                                                                                                                                                                                                                                                                                                                                                                                                                                                                                                                                                                                                                                                                                                                                                                                                                                                                                                                                                                                                                                                                                                                                                                                                                                                                                                                                                                                                                                                                                                                                                                                                                                                                                                                                                                                                                                                                                                                                                                                                                                                                                                                                                                                                                       |      |                |     |                                                                                                                                                                                                                                                                                                                                                                                                                                          |      |                                                       |              |                                                                                                                                                                 |     |                                                                                                                                                                                                                                                                                                                                                                                                                                                                                                                                                                                                                                                                                                                                  |       |                                             |                   |                                             |           |                        |               |                                                                                                                                                                                                                                                                                                                                                                                                                                                                                                                                                                                                                        |                                                                                                                                                                                                                                                                                                                         |                                                                                                                                                                                                |
|---------------------|----------------------------------------------------------------------------------------------------------------------------------------------------------------------------------------------------------------------------------------------------------------------------------------------------------------------------------------------------------------------------------------------------------------------------------------------------------------------------------------------------------------------------------------------------------------------------------------------------------------------------------------------------------------------------------------------------------------------------------|-----------------------------------------------------------------------------------------------------------------------------------------------------------------------------------------------------------------------------------------------------------------------------------------------------------------------------------------------------------------------------------------------------------------------------------------------------------------------------------------------------------------------------------------------------------------------------------------------------------------------------------------------------------------------------------------------------------------------------------------------------------------------------------------------------------------------------------------------------------------------------------------------------------------------------------------------------------------------------------------------------------------------------------------------------------------------------------------------------------------------------------------------------------------------------------------------------------------------------------------------------------------------------------------------------------------------------------------------------------------------------------------------------|----------------------------------------------------------------------------------------------------------------------------|---------------------------------------------------------------------------------------------------------------------------------------------------------------------------------------------------------------------------------------------------------------------------------------------------------------------------------------------------------------------------------------------------------------------------------------------------------------------------------------------------------------------------------------------------------------------------------------------------------------------------------------------------------------------------------------------------------------------------------------------------------------------------------------------------------------------------------------------------------------------------------------------------------------------------------------------------------------------------------|-----|-----|------|----|--------|----------------------------------|--------------------------------------------------------|------------------------------------|-----------|-----------------------------------------------|--------------------|---|------|----------------------------------------------------------------------------------------------------------------------------------------------------------------------------------------------------------------------------------------------------------------------------------------------------------------------------------|-------------------------------------------------------------------|--------------------------------------------------------------------------------------------------------------------|------------------------------------------------------------------------------------------------------------------------------------------------------------------------------------------------------------------------------------------------------------------------------------------------------------------------------------------------------------------------------------------------------------------------------------------------------------------------------|--------------------------------------------------------------------------------------------------------------------------------------------------------------------------------|---|--------------------------------------------------------------------------|-------------------------------------------------------------------------------------------------------------------------------------------------------------------------------------------------------------------------------------------------------------------------------------------------------------------------------------------------------------------------------------------------------------------------------------------------------------------------------------------------------------------------------------------------------------------------------------------------------------------------------------------------------------------------------------------------------------------------------------------------------------------------------------------------------------------------------------------------------------------------------------------------------------------------------------------------------------------------------------------------------------------------------------------------------------------------------------------------------------------------------------------------------------------------------------------------------------------------------------------------------------------------------------------------------------------------------------------------------------------------------------------------------------------------------------------------------------------------------------------------------------------------------------------------------------------------------------------------------------------------------------------------------------------------------------------------------------------------------------------------------------------------------------------------------------------------------------------------------------------------------------------------------------------------------------------------------------------------------------------------------------------------------------------------------------------------------------------------------------------------------------------------------------------------------------------------------------------------------------------------------------------------------------------------------------------------------------------------------------------------------------------------------------------------------------------------------------------------------------------------------------------------------------------------------------------------------------------------------|------|----------------|-----|------------------------------------------------------------------------------------------------------------------------------------------------------------------------------------------------------------------------------------------------------------------------------------------------------------------------------------------------------------------------------------------------------------------------------------------|------|-------------------------------------------------------|--------------|-----------------------------------------------------------------------------------------------------------------------------------------------------------------|-----|----------------------------------------------------------------------------------------------------------------------------------------------------------------------------------------------------------------------------------------------------------------------------------------------------------------------------------------------------------------------------------------------------------------------------------------------------------------------------------------------------------------------------------------------------------------------------------------------------------------------------------------------------------------------------------------------------------------------------------|-------|---------------------------------------------|-------------------|---------------------------------------------|-----------|------------------------|---------------|------------------------------------------------------------------------------------------------------------------------------------------------------------------------------------------------------------------------------------------------------------------------------------------------------------------------------------------------------------------------------------------------------------------------------------------------------------------------------------------------------------------------------------------------------------------------------------------------------------------------|-------------------------------------------------------------------------------------------------------------------------------------------------------------------------------------------------------------------------------------------------------------------------------------------------------------------------|------------------------------------------------------------------------------------------------------------------------------------------------------------------------------------------------|
| Brown 2018 (13)     | <p>Uncontrolled before-and-after study, mixed-methods</p> <p>Study length: 8 months</p>                                                                                                                                                                                                                                                                                                                                                                                                                                                                                                                                                                                                                                          | <p><b>Inclusion criteria:</b></p> <ul style="list-style-type: none"> <li>- social isolation/loneliness</li> <li>- practical support needs (including benefits, letter writing, housing, debt etc.)</li> <li>- over-reliance on NHS services</li> <li>- bereavement</li> <li>- need for improved self-care (e.g. diet and exercise)</li> <li>- low confidence and self-esteem (including mild-moderate depression/anxiety)</li> <li>-referrals were also open to any other patients whom GPs/practice staff felt would benefit from non-medical sources of support</li> </ul> <p><b>Exclusion criteria:</b></p> <ul style="list-style-type: none"> <li>- under the age of 18</li> <li>- a threat to themselves/others</li> <li>- in a crisis situation</li> <li>- suffering from uncontrolled mental health issues or addictions</li> <li>- suffering from dementia</li> </ul> <p>Baseline characteristics:</p> <table border="1" data-bbox="477 772 1071 1094"> <tr> <td>N</td> <td></td> <td>318</td> </tr> <tr> <td>Age</td> <td>Mean</td> <td>54</td> </tr> <tr> <td>Gender</td> <td>Female %</td> <td>67.3</td> </tr> <tr> <td>Ethnicity</td> <td>British %</td> <td>94</td> </tr> <tr> <td>Living arrangement</td> <td>-</td> <td>-</td> </tr> <tr> <td>Employment status</td> <td>-</td> <td>-</td> </tr> <tr> <td>other</td> <td>-</td> <td>-</td> </tr> </table> <p>Population: General</p> | N                                                                                                                          |                                                                                                                                                                                                                                                                                                                                                                                                                                                                                                                                                                                                                                                                                                                                                                                                                                                                                                                                                                                 | 318 | Age | Mean | 54 | Gender | Female %                         | 67.3                                                   | Ethnicity                          | British % | 94                                            | Living arrangement | - | -    | Employment status                                                                                                                                                                                                                                                                                                                | -                                                                 | -                                                                                                                  | other                                                                                                                                                                                                                                                                                                                                                                                                                                                                        | -                                                                                                                                                                              | - | <p>Primary care</p> <p>Country:<br/>UK (Bristol, South West England)</p> | <table border="1" data-bbox="1308 226 2228 1318"> <tr> <td>Name</td> <td>Community Webs</td> </tr> <tr> <td>Why</td> <td> <p>Improve how health, social care and community services work together, supporting positive mental wellbeing, building community assets, reducing social isolation and ageing better</p> <p>-provide patients with appropriate support to deal with non-medical issues through coaching and referrals to organisations in the local community (or beyond, as appropriate) and to reduce their use of GP time for non-medical issues</p> </td> </tr> <tr> <td>What</td> <td>Person-centred supported referral/signposting service</td> </tr> <tr> <td>Who provided</td> <td>One Project Coordinator with two Community Webs Linkworkers who are based within a cluster of GP practices and receive direct referrals from GPs/practice staff</td> </tr> <tr> <td>How</td> <td> <p>1. referral to Community Webs from GP practice staff 2. patients meet with Community Webs linkworker (Session 1: guided conversation around patient's needs/wants/barriers, use motivational interviewing techniques, identify practical support needs, contact relevant organisations, begin to construct action plan of support)</p> <p>3. sessions 2-4 as needed (construct action plan together, check up whether referrals have been actioned, ensure practical support needs have been/are being met, supported referral to organisations/groups/activities), Community Webs Link-Workers provided support to clients, often to help maintain confidence and commitments to engage with activities in the community</p> </td> </tr> <tr> <td>Where</td> <td>Face-to-face after appointment by telephone</td> </tr> <tr> <td>When and How Much</td> <td>3 months, 2 - 4 sessions (each 1-1,5 hours)</td> </tr> <tr> <td>Tailoring</td> <td>Individual action plan</td> </tr> <tr> <td>Modifications</td> <td>The project has undergone several changes since it was originally planned. The tender for the project was won by a cluster group of practices in the south of Bristol, Greater Bedminster area. Initially the project was to be managed by a Community Webs Project Lead, employed by the Bristol Clinical Commissioning Group (BCCG), however it was not possible to recruit to the role. It was felt that this was partly due to the dual skill sets required of project management along with patient-facing signposting and navigation experience, which on reflection was considered to be an unlikely skill mix.</td> </tr> </table> <p>Intervention: Holistic</p> | Name | Community Webs | Why | <p>Improve how health, social care and community services work together, supporting positive mental wellbeing, building community assets, reducing social isolation and ageing better</p> <p>-provide patients with appropriate support to deal with non-medical issues through coaching and referrals to organisations in the local community (or beyond, as appropriate) and to reduce their use of GP time for non-medical issues</p> | What | Person-centred supported referral/signposting service | Who provided | One Project Coordinator with two Community Webs Linkworkers who are based within a cluster of GP practices and receive direct referrals from GPs/practice staff | How | <p>1. referral to Community Webs from GP practice staff 2. patients meet with Community Webs linkworker (Session 1: guided conversation around patient's needs/wants/barriers, use motivational interviewing techniques, identify practical support needs, contact relevant organisations, begin to construct action plan of support)</p> <p>3. sessions 2-4 as needed (construct action plan together, check up whether referrals have been actioned, ensure practical support needs have been/are being met, supported referral to organisations/groups/activities), Community Webs Link-Workers provided support to clients, often to help maintain confidence and commitments to engage with activities in the community</p> | Where | Face-to-face after appointment by telephone | When and How Much | 3 months, 2 - 4 sessions (each 1-1,5 hours) | Tailoring | Individual action plan | Modifications | The project has undergone several changes since it was originally planned. The tender for the project was won by a cluster group of practices in the south of Bristol, Greater Bedminster area. Initially the project was to be managed by a Community Webs Project Lead, employed by the Bristol Clinical Commissioning Group (BCCG), however it was not possible to recruit to the role. It was felt that this was partly due to the dual skill sets required of project management along with patient-facing signposting and navigation experience, which on reflection was considered to be an unlikely skill mix. | <p>Patient outcomes at baseline (pre intervention), at exit and 3-months follow-up (via questionnaire):</p> <ul style="list-style-type: none"> <li>- De Jong Gierveld Loneliness Scale</li> <li>- UCLA Loneliness Scale</li> <li>- Short Warwick Edinburgh Mental Wellbeing Scale (SWEMWBS)</li> <li>-MYCAW*</li> </ul> | <p>Peer Review: no</p> <p>Funding source: Bristol Ageing Better (BAB) &amp; Better Care Bristol (BCB), BAB is funded by the Big Lottery Fund</p> <p>Declaration of interest: Not mentioned</p> |
| N                   |                                                                                                                                                                                                                                                                                                                                                                                                                                                                                                                                                                                                                                                                                                                                  | 318                                                                                                                                                                                                                                                                                                                                                                                                                                                                                                                                                                                                                                                                                                                                                                                                                                                                                                                                                                                                                                                                                                                                                                                                                                                                                                                                                                                                 |                                                                                                                            |                                                                                                                                                                                                                                                                                                                                                                                                                                                                                                                                                                                                                                                                                                                                                                                                                                                                                                                                                                                 |     |     |      |    |        |                                  |                                                        |                                    |           |                                               |                    |   |      |                                                                                                                                                                                                                                                                                                                                  |                                                                   |                                                                                                                    |                                                                                                                                                                                                                                                                                                                                                                                                                                                                              |                                                                                                                                                                                |   |                                                                          |                                                                                                                                                                                                                                                                                                                                                                                                                                                                                                                                                                                                                                                                                                                                                                                                                                                                                                                                                                                                                                                                                                                                                                                                                                                                                                                                                                                                                                                                                                                                                                                                                                                                                                                                                                                                                                                                                                                                                                                                                                                                                                                                                                                                                                                                                                                                                                                                                                                                                                                                                                                                       |      |                |     |                                                                                                                                                                                                                                                                                                                                                                                                                                          |      |                                                       |              |                                                                                                                                                                 |     |                                                                                                                                                                                                                                                                                                                                                                                                                                                                                                                                                                                                                                                                                                                                  |       |                                             |                   |                                             |           |                        |               |                                                                                                                                                                                                                                                                                                                                                                                                                                                                                                                                                                                                                        |                                                                                                                                                                                                                                                                                                                         |                                                                                                                                                                                                |
| Age                 | Mean                                                                                                                                                                                                                                                                                                                                                                                                                                                                                                                                                                                                                                                                                                                             | 54                                                                                                                                                                                                                                                                                                                                                                                                                                                                                                                                                                                                                                                                                                                                                                                                                                                                                                                                                                                                                                                                                                                                                                                                                                                                                                                                                                                                  |                                                                                                                            |                                                                                                                                                                                                                                                                                                                                                                                                                                                                                                                                                                                                                                                                                                                                                                                                                                                                                                                                                                                 |     |     |      |    |        |                                  |                                                        |                                    |           |                                               |                    |   |      |                                                                                                                                                                                                                                                                                                                                  |                                                                   |                                                                                                                    |                                                                                                                                                                                                                                                                                                                                                                                                                                                                              |                                                                                                                                                                                |   |                                                                          |                                                                                                                                                                                                                                                                                                                                                                                                                                                                                                                                                                                                                                                                                                                                                                                                                                                                                                                                                                                                                                                                                                                                                                                                                                                                                                                                                                                                                                                                                                                                                                                                                                                                                                                                                                                                                                                                                                                                                                                                                                                                                                                                                                                                                                                                                                                                                                                                                                                                                                                                                                                                       |      |                |     |                                                                                                                                                                                                                                                                                                                                                                                                                                          |      |                                                       |              |                                                                                                                                                                 |     |                                                                                                                                                                                                                                                                                                                                                                                                                                                                                                                                                                                                                                                                                                                                  |       |                                             |                   |                                             |           |                        |               |                                                                                                                                                                                                                                                                                                                                                                                                                                                                                                                                                                                                                        |                                                                                                                                                                                                                                                                                                                         |                                                                                                                                                                                                |
| Gender              | Female %                                                                                                                                                                                                                                                                                                                                                                                                                                                                                                                                                                                                                                                                                                                         | 67.3                                                                                                                                                                                                                                                                                                                                                                                                                                                                                                                                                                                                                                                                                                                                                                                                                                                                                                                                                                                                                                                                                                                                                                                                                                                                                                                                                                                                |                                                                                                                            |                                                                                                                                                                                                                                                                                                                                                                                                                                                                                                                                                                                                                                                                                                                                                                                                                                                                                                                                                                                 |     |     |      |    |        |                                  |                                                        |                                    |           |                                               |                    |   |      |                                                                                                                                                                                                                                                                                                                                  |                                                                   |                                                                                                                    |                                                                                                                                                                                                                                                                                                                                                                                                                                                                              |                                                                                                                                                                                |   |                                                                          |                                                                                                                                                                                                                                                                                                                                                                                                                                                                                                                                                                                                                                                                                                                                                                                                                                                                                                                                                                                                                                                                                                                                                                                                                                                                                                                                                                                                                                                                                                                                                                                                                                                                                                                                                                                                                                                                                                                                                                                                                                                                                                                                                                                                                                                                                                                                                                                                                                                                                                                                                                                                       |      |                |     |                                                                                                                                                                                                                                                                                                                                                                                                                                          |      |                                                       |              |                                                                                                                                                                 |     |                                                                                                                                                                                                                                                                                                                                                                                                                                                                                                                                                                                                                                                                                                                                  |       |                                             |                   |                                             |           |                        |               |                                                                                                                                                                                                                                                                                                                                                                                                                                                                                                                                                                                                                        |                                                                                                                                                                                                                                                                                                                         |                                                                                                                                                                                                |
| Ethnicity           | British %                                                                                                                                                                                                                                                                                                                                                                                                                                                                                                                                                                                                                                                                                                                        | 94                                                                                                                                                                                                                                                                                                                                                                                                                                                                                                                                                                                                                                                                                                                                                                                                                                                                                                                                                                                                                                                                                                                                                                                                                                                                                                                                                                                                  |                                                                                                                            |                                                                                                                                                                                                                                                                                                                                                                                                                                                                                                                                                                                                                                                                                                                                                                                                                                                                                                                                                                                 |     |     |      |    |        |                                  |                                                        |                                    |           |                                               |                    |   |      |                                                                                                                                                                                                                                                                                                                                  |                                                                   |                                                                                                                    |                                                                                                                                                                                                                                                                                                                                                                                                                                                                              |                                                                                                                                                                                |   |                                                                          |                                                                                                                                                                                                                                                                                                                                                                                                                                                                                                                                                                                                                                                                                                                                                                                                                                                                                                                                                                                                                                                                                                                                                                                                                                                                                                                                                                                                                                                                                                                                                                                                                                                                                                                                                                                                                                                                                                                                                                                                                                                                                                                                                                                                                                                                                                                                                                                                                                                                                                                                                                                                       |      |                |     |                                                                                                                                                                                                                                                                                                                                                                                                                                          |      |                                                       |              |                                                                                                                                                                 |     |                                                                                                                                                                                                                                                                                                                                                                                                                                                                                                                                                                                                                                                                                                                                  |       |                                             |                   |                                             |           |                        |               |                                                                                                                                                                                                                                                                                                                                                                                                                                                                                                                                                                                                                        |                                                                                                                                                                                                                                                                                                                         |                                                                                                                                                                                                |
| Living arrangement  | -                                                                                                                                                                                                                                                                                                                                                                                                                                                                                                                                                                                                                                                                                                                                | -                                                                                                                                                                                                                                                                                                                                                                                                                                                                                                                                                                                                                                                                                                                                                                                                                                                                                                                                                                                                                                                                                                                                                                                                                                                                                                                                                                                                   |                                                                                                                            |                                                                                                                                                                                                                                                                                                                                                                                                                                                                                                                                                                                                                                                                                                                                                                                                                                                                                                                                                                                 |     |     |      |    |        |                                  |                                                        |                                    |           |                                               |                    |   |      |                                                                                                                                                                                                                                                                                                                                  |                                                                   |                                                                                                                    |                                                                                                                                                                                                                                                                                                                                                                                                                                                                              |                                                                                                                                                                                |   |                                                                          |                                                                                                                                                                                                                                                                                                                                                                                                                                                                                                                                                                                                                                                                                                                                                                                                                                                                                                                                                                                                                                                                                                                                                                                                                                                                                                                                                                                                                                                                                                                                                                                                                                                                                                                                                                                                                                                                                                                                                                                                                                                                                                                                                                                                                                                                                                                                                                                                                                                                                                                                                                                                       |      |                |     |                                                                                                                                                                                                                                                                                                                                                                                                                                          |      |                                                       |              |                                                                                                                                                                 |     |                                                                                                                                                                                                                                                                                                                                                                                                                                                                                                                                                                                                                                                                                                                                  |       |                                             |                   |                                             |           |                        |               |                                                                                                                                                                                                                                                                                                                                                                                                                                                                                                                                                                                                                        |                                                                                                                                                                                                                                                                                                                         |                                                                                                                                                                                                |
| Employment status   | -                                                                                                                                                                                                                                                                                                                                                                                                                                                                                                                                                                                                                                                                                                                                | -                                                                                                                                                                                                                                                                                                                                                                                                                                                                                                                                                                                                                                                                                                                                                                                                                                                                                                                                                                                                                                                                                                                                                                                                                                                                                                                                                                                                   |                                                                                                                            |                                                                                                                                                                                                                                                                                                                                                                                                                                                                                                                                                                                                                                                                                                                                                                                                                                                                                                                                                                                 |     |     |      |    |        |                                  |                                                        |                                    |           |                                               |                    |   |      |                                                                                                                                                                                                                                                                                                                                  |                                                                   |                                                                                                                    |                                                                                                                                                                                                                                                                                                                                                                                                                                                                              |                                                                                                                                                                                |   |                                                                          |                                                                                                                                                                                                                                                                                                                                                                                                                                                                                                                                                                                                                                                                                                                                                                                                                                                                                                                                                                                                                                                                                                                                                                                                                                                                                                                                                                                                                                                                                                                                                                                                                                                                                                                                                                                                                                                                                                                                                                                                                                                                                                                                                                                                                                                                                                                                                                                                                                                                                                                                                                                                       |      |                |     |                                                                                                                                                                                                                                                                                                                                                                                                                                          |      |                                                       |              |                                                                                                                                                                 |     |                                                                                                                                                                                                                                                                                                                                                                                                                                                                                                                                                                                                                                                                                                                                  |       |                                             |                   |                                             |           |                        |               |                                                                                                                                                                                                                                                                                                                                                                                                                                                                                                                                                                                                                        |                                                                                                                                                                                                                                                                                                                         |                                                                                                                                                                                                |
| other               | -                                                                                                                                                                                                                                                                                                                                                                                                                                                                                                                                                                                                                                                                                                                                | -                                                                                                                                                                                                                                                                                                                                                                                                                                                                                                                                                                                                                                                                                                                                                                                                                                                                                                                                                                                                                                                                                                                                                                                                                                                                                                                                                                                                   |                                                                                                                            |                                                                                                                                                                                                                                                                                                                                                                                                                                                                                                                                                                                                                                                                                                                                                                                                                                                                                                                                                                                 |     |     |      |    |        |                                  |                                                        |                                    |           |                                               |                    |   |      |                                                                                                                                                                                                                                                                                                                                  |                                                                   |                                                                                                                    |                                                                                                                                                                                                                                                                                                                                                                                                                                                                              |                                                                                                                                                                                |   |                                                                          |                                                                                                                                                                                                                                                                                                                                                                                                                                                                                                                                                                                                                                                                                                                                                                                                                                                                                                                                                                                                                                                                                                                                                                                                                                                                                                                                                                                                                                                                                                                                                                                                                                                                                                                                                                                                                                                                                                                                                                                                                                                                                                                                                                                                                                                                                                                                                                                                                                                                                                                                                                                                       |      |                |     |                                                                                                                                                                                                                                                                                                                                                                                                                                          |      |                                                       |              |                                                                                                                                                                 |     |                                                                                                                                                                                                                                                                                                                                                                                                                                                                                                                                                                                                                                                                                                                                  |       |                                             |                   |                                             |           |                        |               |                                                                                                                                                                                                                                                                                                                                                                                                                                                                                                                                                                                                                        |                                                                                                                                                                                                                                                                                                                         |                                                                                                                                                                                                |
| Name                | Community Webs                                                                                                                                                                                                                                                                                                                                                                                                                                                                                                                                                                                                                                                                                                                   |                                                                                                                                                                                                                                                                                                                                                                                                                                                                                                                                                                                                                                                                                                                                                                                                                                                                                                                                                                                                                                                                                                                                                                                                                                                                                                                                                                                                     |                                                                                                                            |                                                                                                                                                                                                                                                                                                                                                                                                                                                                                                                                                                                                                                                                                                                                                                                                                                                                                                                                                                                 |     |     |      |    |        |                                  |                                                        |                                    |           |                                               |                    |   |      |                                                                                                                                                                                                                                                                                                                                  |                                                                   |                                                                                                                    |                                                                                                                                                                                                                                                                                                                                                                                                                                                                              |                                                                                                                                                                                |   |                                                                          |                                                                                                                                                                                                                                                                                                                                                                                                                                                                                                                                                                                                                                                                                                                                                                                                                                                                                                                                                                                                                                                                                                                                                                                                                                                                                                                                                                                                                                                                                                                                                                                                                                                                                                                                                                                                                                                                                                                                                                                                                                                                                                                                                                                                                                                                                                                                                                                                                                                                                                                                                                                                       |      |                |     |                                                                                                                                                                                                                                                                                                                                                                                                                                          |      |                                                       |              |                                                                                                                                                                 |     |                                                                                                                                                                                                                                                                                                                                                                                                                                                                                                                                                                                                                                                                                                                                  |       |                                             |                   |                                             |           |                        |               |                                                                                                                                                                                                                                                                                                                                                                                                                                                                                                                                                                                                                        |                                                                                                                                                                                                                                                                                                                         |                                                                                                                                                                                                |
| Why                 | <p>Improve how health, social care and community services work together, supporting positive mental wellbeing, building community assets, reducing social isolation and ageing better</p> <p>-provide patients with appropriate support to deal with non-medical issues through coaching and referrals to organisations in the local community (or beyond, as appropriate) and to reduce their use of GP time for non-medical issues</p>                                                                                                                                                                                                                                                                                         |                                                                                                                                                                                                                                                                                                                                                                                                                                                                                                                                                                                                                                                                                                                                                                                                                                                                                                                                                                                                                                                                                                                                                                                                                                                                                                                                                                                                     |                                                                                                                            |                                                                                                                                                                                                                                                                                                                                                                                                                                                                                                                                                                                                                                                                                                                                                                                                                                                                                                                                                                                 |     |     |      |    |        |                                  |                                                        |                                    |           |                                               |                    |   |      |                                                                                                                                                                                                                                                                                                                                  |                                                                   |                                                                                                                    |                                                                                                                                                                                                                                                                                                                                                                                                                                                                              |                                                                                                                                                                                |   |                                                                          |                                                                                                                                                                                                                                                                                                                                                                                                                                                                                                                                                                                                                                                                                                                                                                                                                                                                                                                                                                                                                                                                                                                                                                                                                                                                                                                                                                                                                                                                                                                                                                                                                                                                                                                                                                                                                                                                                                                                                                                                                                                                                                                                                                                                                                                                                                                                                                                                                                                                                                                                                                                                       |      |                |     |                                                                                                                                                                                                                                                                                                                                                                                                                                          |      |                                                       |              |                                                                                                                                                                 |     |                                                                                                                                                                                                                                                                                                                                                                                                                                                                                                                                                                                                                                                                                                                                  |       |                                             |                   |                                             |           |                        |               |                                                                                                                                                                                                                                                                                                                                                                                                                                                                                                                                                                                                                        |                                                                                                                                                                                                                                                                                                                         |                                                                                                                                                                                                |
| What                | Person-centred supported referral/signposting service                                                                                                                                                                                                                                                                                                                                                                                                                                                                                                                                                                                                                                                                            |                                                                                                                                                                                                                                                                                                                                                                                                                                                                                                                                                                                                                                                                                                                                                                                                                                                                                                                                                                                                                                                                                                                                                                                                                                                                                                                                                                                                     |                                                                                                                            |                                                                                                                                                                                                                                                                                                                                                                                                                                                                                                                                                                                                                                                                                                                                                                                                                                                                                                                                                                                 |     |     |      |    |        |                                  |                                                        |                                    |           |                                               |                    |   |      |                                                                                                                                                                                                                                                                                                                                  |                                                                   |                                                                                                                    |                                                                                                                                                                                                                                                                                                                                                                                                                                                                              |                                                                                                                                                                                |   |                                                                          |                                                                                                                                                                                                                                                                                                                                                                                                                                                                                                                                                                                                                                                                                                                                                                                                                                                                                                                                                                                                                                                                                                                                                                                                                                                                                                                                                                                                                                                                                                                                                                                                                                                                                                                                                                                                                                                                                                                                                                                                                                                                                                                                                                                                                                                                                                                                                                                                                                                                                                                                                                                                       |      |                |     |                                                                                                                                                                                                                                                                                                                                                                                                                                          |      |                                                       |              |                                                                                                                                                                 |     |                                                                                                                                                                                                                                                                                                                                                                                                                                                                                                                                                                                                                                                                                                                                  |       |                                             |                   |                                             |           |                        |               |                                                                                                                                                                                                                                                                                                                                                                                                                                                                                                                                                                                                                        |                                                                                                                                                                                                                                                                                                                         |                                                                                                                                                                                                |
| Who provided        | One Project Coordinator with two Community Webs Linkworkers who are based within a cluster of GP practices and receive direct referrals from GPs/practice staff                                                                                                                                                                                                                                                                                                                                                                                                                                                                                                                                                                  |                                                                                                                                                                                                                                                                                                                                                                                                                                                                                                                                                                                                                                                                                                                                                                                                                                                                                                                                                                                                                                                                                                                                                                                                                                                                                                                                                                                                     |                                                                                                                            |                                                                                                                                                                                                                                                                                                                                                                                                                                                                                                                                                                                                                                                                                                                                                                                                                                                                                                                                                                                 |     |     |      |    |        |                                  |                                                        |                                    |           |                                               |                    |   |      |                                                                                                                                                                                                                                                                                                                                  |                                                                   |                                                                                                                    |                                                                                                                                                                                                                                                                                                                                                                                                                                                                              |                                                                                                                                                                                |   |                                                                          |                                                                                                                                                                                                                                                                                                                                                                                                                                                                                                                                                                                                                                                                                                                                                                                                                                                                                                                                                                                                                                                                                                                                                                                                                                                                                                                                                                                                                                                                                                                                                                                                                                                                                                                                                                                                                                                                                                                                                                                                                                                                                                                                                                                                                                                                                                                                                                                                                                                                                                                                                                                                       |      |                |     |                                                                                                                                                                                                                                                                                                                                                                                                                                          |      |                                                       |              |                                                                                                                                                                 |     |                                                                                                                                                                                                                                                                                                                                                                                                                                                                                                                                                                                                                                                                                                                                  |       |                                             |                   |                                             |           |                        |               |                                                                                                                                                                                                                                                                                                                                                                                                                                                                                                                                                                                                                        |                                                                                                                                                                                                                                                                                                                         |                                                                                                                                                                                                |
| How                 | <p>1. referral to Community Webs from GP practice staff 2. patients meet with Community Webs linkworker (Session 1: guided conversation around patient's needs/wants/barriers, use motivational interviewing techniques, identify practical support needs, contact relevant organisations, begin to construct action plan of support)</p> <p>3. sessions 2-4 as needed (construct action plan together, check up whether referrals have been actioned, ensure practical support needs have been/are being met, supported referral to organisations/groups/activities), Community Webs Link-Workers provided support to clients, often to help maintain confidence and commitments to engage with activities in the community</p> |                                                                                                                                                                                                                                                                                                                                                                                                                                                                                                                                                                                                                                                                                                                                                                                                                                                                                                                                                                                                                                                                                                                                                                                                                                                                                                                                                                                                     |                                                                                                                            |                                                                                                                                                                                                                                                                                                                                                                                                                                                                                                                                                                                                                                                                                                                                                                                                                                                                                                                                                                                 |     |     |      |    |        |                                  |                                                        |                                    |           |                                               |                    |   |      |                                                                                                                                                                                                                                                                                                                                  |                                                                   |                                                                                                                    |                                                                                                                                                                                                                                                                                                                                                                                                                                                                              |                                                                                                                                                                                |   |                                                                          |                                                                                                                                                                                                                                                                                                                                                                                                                                                                                                                                                                                                                                                                                                                                                                                                                                                                                                                                                                                                                                                                                                                                                                                                                                                                                                                                                                                                                                                                                                                                                                                                                                                                                                                                                                                                                                                                                                                                                                                                                                                                                                                                                                                                                                                                                                                                                                                                                                                                                                                                                                                                       |      |                |     |                                                                                                                                                                                                                                                                                                                                                                                                                                          |      |                                                       |              |                                                                                                                                                                 |     |                                                                                                                                                                                                                                                                                                                                                                                                                                                                                                                                                                                                                                                                                                                                  |       |                                             |                   |                                             |           |                        |               |                                                                                                                                                                                                                                                                                                                                                                                                                                                                                                                                                                                                                        |                                                                                                                                                                                                                                                                                                                         |                                                                                                                                                                                                |
| Where               | Face-to-face after appointment by telephone                                                                                                                                                                                                                                                                                                                                                                                                                                                                                                                                                                                                                                                                                      |                                                                                                                                                                                                                                                                                                                                                                                                                                                                                                                                                                                                                                                                                                                                                                                                                                                                                                                                                                                                                                                                                                                                                                                                                                                                                                                                                                                                     |                                                                                                                            |                                                                                                                                                                                                                                                                                                                                                                                                                                                                                                                                                                                                                                                                                                                                                                                                                                                                                                                                                                                 |     |     |      |    |        |                                  |                                                        |                                    |           |                                               |                    |   |      |                                                                                                                                                                                                                                                                                                                                  |                                                                   |                                                                                                                    |                                                                                                                                                                                                                                                                                                                                                                                                                                                                              |                                                                                                                                                                                |   |                                                                          |                                                                                                                                                                                                                                                                                                                                                                                                                                                                                                                                                                                                                                                                                                                                                                                                                                                                                                                                                                                                                                                                                                                                                                                                                                                                                                                                                                                                                                                                                                                                                                                                                                                                                                                                                                                                                                                                                                                                                                                                                                                                                                                                                                                                                                                                                                                                                                                                                                                                                                                                                                                                       |      |                |     |                                                                                                                                                                                                                                                                                                                                                                                                                                          |      |                                                       |              |                                                                                                                                                                 |     |                                                                                                                                                                                                                                                                                                                                                                                                                                                                                                                                                                                                                                                                                                                                  |       |                                             |                   |                                             |           |                        |               |                                                                                                                                                                                                                                                                                                                                                                                                                                                                                                                                                                                                                        |                                                                                                                                                                                                                                                                                                                         |                                                                                                                                                                                                |
| When and How Much   | 3 months, 2 - 4 sessions (each 1-1,5 hours)                                                                                                                                                                                                                                                                                                                                                                                                                                                                                                                                                                                                                                                                                      |                                                                                                                                                                                                                                                                                                                                                                                                                                                                                                                                                                                                                                                                                                                                                                                                                                                                                                                                                                                                                                                                                                                                                                                                                                                                                                                                                                                                     |                                                                                                                            |                                                                                                                                                                                                                                                                                                                                                                                                                                                                                                                                                                                                                                                                                                                                                                                                                                                                                                                                                                                 |     |     |      |    |        |                                  |                                                        |                                    |           |                                               |                    |   |      |                                                                                                                                                                                                                                                                                                                                  |                                                                   |                                                                                                                    |                                                                                                                                                                                                                                                                                                                                                                                                                                                                              |                                                                                                                                                                                |   |                                                                          |                                                                                                                                                                                                                                                                                                                                                                                                                                                                                                                                                                                                                                                                                                                                                                                                                                                                                                                                                                                                                                                                                                                                                                                                                                                                                                                                                                                                                                                                                                                                                                                                                                                                                                                                                                                                                                                                                                                                                                                                                                                                                                                                                                                                                                                                                                                                                                                                                                                                                                                                                                                                       |      |                |     |                                                                                                                                                                                                                                                                                                                                                                                                                                          |      |                                                       |              |                                                                                                                                                                 |     |                                                                                                                                                                                                                                                                                                                                                                                                                                                                                                                                                                                                                                                                                                                                  |       |                                             |                   |                                             |           |                        |               |                                                                                                                                                                                                                                                                                                                                                                                                                                                                                                                                                                                                                        |                                                                                                                                                                                                                                                                                                                         |                                                                                                                                                                                                |
| Tailoring           | Individual action plan                                                                                                                                                                                                                                                                                                                                                                                                                                                                                                                                                                                                                                                                                                           |                                                                                                                                                                                                                                                                                                                                                                                                                                                                                                                                                                                                                                                                                                                                                                                                                                                                                                                                                                                                                                                                                                                                                                                                                                                                                                                                                                                                     |                                                                                                                            |                                                                                                                                                                                                                                                                                                                                                                                                                                                                                                                                                                                                                                                                                                                                                                                                                                                                                                                                                                                 |     |     |      |    |        |                                  |                                                        |                                    |           |                                               |                    |   |      |                                                                                                                                                                                                                                                                                                                                  |                                                                   |                                                                                                                    |                                                                                                                                                                                                                                                                                                                                                                                                                                                                              |                                                                                                                                                                                |   |                                                                          |                                                                                                                                                                                                                                                                                                                                                                                                                                                                                                                                                                                                                                                                                                                                                                                                                                                                                                                                                                                                                                                                                                                                                                                                                                                                                                                                                                                                                                                                                                                                                                                                                                                                                                                                                                                                                                                                                                                                                                                                                                                                                                                                                                                                                                                                                                                                                                                                                                                                                                                                                                                                       |      |                |     |                                                                                                                                                                                                                                                                                                                                                                                                                                          |      |                                                       |              |                                                                                                                                                                 |     |                                                                                                                                                                                                                                                                                                                                                                                                                                                                                                                                                                                                                                                                                                                                  |       |                                             |                   |                                             |           |                        |               |                                                                                                                                                                                                                                                                                                                                                                                                                                                                                                                                                                                                                        |                                                                                                                                                                                                                                                                                                                         |                                                                                                                                                                                                |
| Modifications       | The project has undergone several changes since it was originally planned. The tender for the project was won by a cluster group of practices in the south of Bristol, Greater Bedminster area. Initially the project was to be managed by a Community Webs Project Lead, employed by the Bristol Clinical Commissioning Group (BCCG), however it was not possible to recruit to the role. It was felt that this was partly due to the dual skill sets required of project management along with patient-facing signposting and navigation experience, which on reflection was considered to be an unlikely skill mix.                                                                                                           |                                                                                                                                                                                                                                                                                                                                                                                                                                                                                                                                                                                                                                                                                                                                                                                                                                                                                                                                                                                                                                                                                                                                                                                                                                                                                                                                                                                                     |                                                                                                                            |                                                                                                                                                                                                                                                                                                                                                                                                                                                                                                                                                                                                                                                                                                                                                                                                                                                                                                                                                                                 |     |     |      |    |        |                                  |                                                        |                                    |           |                                               |                    |   |      |                                                                                                                                                                                                                                                                                                                                  |                                                                   |                                                                                                                    |                                                                                                                                                                                                                                                                                                                                                                                                                                                                              |                                                                                                                                                                                |   |                                                                          |                                                                                                                                                                                                                                                                                                                                                                                                                                                                                                                                                                                                                                                                                                                                                                                                                                                                                                                                                                                                                                                                                                                                                                                                                                                                                                                                                                                                                                                                                                                                                                                                                                                                                                                                                                                                                                                                                                                                                                                                                                                                                                                                                                                                                                                                                                                                                                                                                                                                                                                                                                                                       |      |                |     |                                                                                                                                                                                                                                                                                                                                                                                                                                          |      |                                                       |              |                                                                                                                                                                 |     |                                                                                                                                                                                                                                                                                                                                                                                                                                                                                                                                                                                                                                                                                                                                  |       |                                             |                   |                                             |           |                        |               |                                                                                                                                                                                                                                                                                                                                                                                                                                                                                                                                                                                                                        |                                                                                                                                                                                                                                                                                                                         |                                                                                                                                                                                                |
| Carnes 2017 (94-96) | <p>Non-randomized controlled study, mixed methods</p> <p>Study length: 25 months</p>                                                                                                                                                                                                                                                                                                                                                                                                                                                                                                                                                                                                                                             | <p><b>Inclusion criteria:</b></p> <p>Intervention: Frequent attender and/or socially isolated, presenting with a social problem, mild-moderate mental health problems.</p> <p>Control 1: Randomly selected from neighbouring areas not involved in the scheme, older than 23 and younger than 85 old suffering from at least one of the following: depression, anxiety, type 2 diabetes</p> <p>Control 2: -</p> <p><b>Exclusion criteria:</b></p> <p>Intervention: Acute crisis, at risk to self and/or others, had uncontrolled addictions or uncontrolled mental health problems, got a care plan in action from another organization, unsuited for group related activities, housebound.</p> <p>Control 1: Palliative care, housebound</p>                                                                                                                                                                                                                                                                                                                                                                                                                                                                                                                                                                                                                                                       | <p>Primary Care, general practices</p> <p>Country:<br/>UK (London Borough of Hackney and City, Eastern Greater London)</p> | <table border="1" data-bbox="1308 1402 2228 1906"> <tr> <td></td> <td>I</td> <td>C1</td> <td>C2</td> </tr> <tr> <td>Name</td> <td>Family action social prescribing</td> <td>General and mental health, wellbeing and active living</td> <td>GP consultation and medication use</td> </tr> <tr> <td>Why</td> <td>Improve well-being and increase self-efficacy</td> <td></td> <td></td> </tr> <tr> <td>What</td> <td>Referral to a Social prescribing coordinator. A mutually determined well-being action plan was devised containing goals for improving patient wellbeing, in some cases this involved referring patients to community organisations and services. If necessary, a volunteer was assigned to help the patient achieve their goals.</td> <td>A matched control group from six GP practices in City and Hackney</td> <td>GP consultation rates over a two year period (July 2013-June 2015) from a matched control group from participating</td> </tr> </table> |     | I   | C1   | C2 | Name   | Family action social prescribing | General and mental health, wellbeing and active living | GP consultation and medication use | Why       | Improve well-being and increase self-efficacy |                    |   | What | Referral to a Social prescribing coordinator. A mutually determined well-being action plan was devised containing goals for improving patient wellbeing, in some cases this involved referring patients to community organisations and services. If necessary, a volunteer was assigned to help the patient achieve their goals. | A matched control group from six GP practices in City and Hackney | GP consultation rates over a two year period (July 2013-June 2015) from a matched control group from participating | <p>Patient outcomes at Baseline, 12 weeks and 8 months follow-up via postal questionnaire:</p> <ul style="list-style-type: none"> <li>- General health score EQ-5D</li> <li>- Hospital Anxiety and Depression Scale (HADS)</li> <li>- Wellbeing (past week) (0-6)</li> <li>- Active engagement in life score (0-20)</li> <li>- Number of regular activities (0-6)</li> <li>- Positive and Active Engagement in Life, Health Education Impact Questionnaire (heiQ)</li> </ul> | <p>Peer-Review: Partly (1/3)</p> <p>Funding source: City and Hackney Clinical Commissioning Group and The Health Foundation</p> <p>Declarations of interest: None declared</p> |   |                                                                          |                                                                                                                                                                                                                                                                                                                                                                                                                                                                                                                                                                                                                                                                                                                                                                                                                                                                                                                                                                                                                                                                                                                                                                                                                                                                                                                                                                                                                                                                                                                                                                                                                                                                                                                                                                                                                                                                                                                                                                                                                                                                                                                                                                                                                                                                                                                                                                                                                                                                                                                                                                                                       |      |                |     |                                                                                                                                                                                                                                                                                                                                                                                                                                          |      |                                                       |              |                                                                                                                                                                 |     |                                                                                                                                                                                                                                                                                                                                                                                                                                                                                                                                                                                                                                                                                                                                  |       |                                             |                   |                                             |           |                        |               |                                                                                                                                                                                                                                                                                                                                                                                                                                                                                                                                                                                                                        |                                                                                                                                                                                                                                                                                                                         |                                                                                                                                                                                                |
|                     | I                                                                                                                                                                                                                                                                                                                                                                                                                                                                                                                                                                                                                                                                                                                                | C1                                                                                                                                                                                                                                                                                                                                                                                                                                                                                                                                                                                                                                                                                                                                                                                                                                                                                                                                                                                                                                                                                                                                                                                                                                                                                                                                                                                                  | C2                                                                                                                         |                                                                                                                                                                                                                                                                                                                                                                                                                                                                                                                                                                                                                                                                                                                                                                                                                                                                                                                                                                                 |     |     |      |    |        |                                  |                                                        |                                    |           |                                               |                    |   |      |                                                                                                                                                                                                                                                                                                                                  |                                                                   |                                                                                                                    |                                                                                                                                                                                                                                                                                                                                                                                                                                                                              |                                                                                                                                                                                |   |                                                                          |                                                                                                                                                                                                                                                                                                                                                                                                                                                                                                                                                                                                                                                                                                                                                                                                                                                                                                                                                                                                                                                                                                                                                                                                                                                                                                                                                                                                                                                                                                                                                                                                                                                                                                                                                                                                                                                                                                                                                                                                                                                                                                                                                                                                                                                                                                                                                                                                                                                                                                                                                                                                       |      |                |     |                                                                                                                                                                                                                                                                                                                                                                                                                                          |      |                                                       |              |                                                                                                                                                                 |     |                                                                                                                                                                                                                                                                                                                                                                                                                                                                                                                                                                                                                                                                                                                                  |       |                                             |                   |                                             |           |                        |               |                                                                                                                                                                                                                                                                                                                                                                                                                                                                                                                                                                                                                        |                                                                                                                                                                                                                                                                                                                         |                                                                                                                                                                                                |
| Name                | Family action social prescribing                                                                                                                                                                                                                                                                                                                                                                                                                                                                                                                                                                                                                                                                                                 | General and mental health, wellbeing and active living                                                                                                                                                                                                                                                                                                                                                                                                                                                                                                                                                                                                                                                                                                                                                                                                                                                                                                                                                                                                                                                                                                                                                                                                                                                                                                                                              | GP consultation and medication use                                                                                         |                                                                                                                                                                                                                                                                                                                                                                                                                                                                                                                                                                                                                                                                                                                                                                                                                                                                                                                                                                                 |     |     |      |    |        |                                  |                                                        |                                    |           |                                               |                    |   |      |                                                                                                                                                                                                                                                                                                                                  |                                                                   |                                                                                                                    |                                                                                                                                                                                                                                                                                                                                                                                                                                                                              |                                                                                                                                                                                |   |                                                                          |                                                                                                                                                                                                                                                                                                                                                                                                                                                                                                                                                                                                                                                                                                                                                                                                                                                                                                                                                                                                                                                                                                                                                                                                                                                                                                                                                                                                                                                                                                                                                                                                                                                                                                                                                                                                                                                                                                                                                                                                                                                                                                                                                                                                                                                                                                                                                                                                                                                                                                                                                                                                       |      |                |     |                                                                                                                                                                                                                                                                                                                                                                                                                                          |      |                                                       |              |                                                                                                                                                                 |     |                                                                                                                                                                                                                                                                                                                                                                                                                                                                                                                                                                                                                                                                                                                                  |       |                                             |                   |                                             |           |                        |               |                                                                                                                                                                                                                                                                                                                                                                                                                                                                                                                                                                                                                        |                                                                                                                                                                                                                                                                                                                         |                                                                                                                                                                                                |
| Why                 | Improve well-being and increase self-efficacy                                                                                                                                                                                                                                                                                                                                                                                                                                                                                                                                                                                                                                                                                    |                                                                                                                                                                                                                                                                                                                                                                                                                                                                                                                                                                                                                                                                                                                                                                                                                                                                                                                                                                                                                                                                                                                                                                                                                                                                                                                                                                                                     |                                                                                                                            |                                                                                                                                                                                                                                                                                                                                                                                                                                                                                                                                                                                                                                                                                                                                                                                                                                                                                                                                                                                 |     |     |      |    |        |                                  |                                                        |                                    |           |                                               |                    |   |      |                                                                                                                                                                                                                                                                                                                                  |                                                                   |                                                                                                                    |                                                                                                                                                                                                                                                                                                                                                                                                                                                                              |                                                                                                                                                                                |   |                                                                          |                                                                                                                                                                                                                                                                                                                                                                                                                                                                                                                                                                                                                                                                                                                                                                                                                                                                                                                                                                                                                                                                                                                                                                                                                                                                                                                                                                                                                                                                                                                                                                                                                                                                                                                                                                                                                                                                                                                                                                                                                                                                                                                                                                                                                                                                                                                                                                                                                                                                                                                                                                                                       |      |                |     |                                                                                                                                                                                                                                                                                                                                                                                                                                          |      |                                                       |              |                                                                                                                                                                 |     |                                                                                                                                                                                                                                                                                                                                                                                                                                                                                                                                                                                                                                                                                                                                  |       |                                             |                   |                                             |           |                        |               |                                                                                                                                                                                                                                                                                                                                                                                                                                                                                                                                                                                                                        |                                                                                                                                                                                                                                                                                                                         |                                                                                                                                                                                                |
| What                | Referral to a Social prescribing coordinator. A mutually determined well-being action plan was devised containing goals for improving patient wellbeing, in some cases this involved referring patients to community organisations and services. If necessary, a volunteer was assigned to help the patient achieve their goals.                                                                                                                                                                                                                                                                                                                                                                                                 | A matched control group from six GP practices in City and Hackney                                                                                                                                                                                                                                                                                                                                                                                                                                                                                                                                                                                                                                                                                                                                                                                                                                                                                                                                                                                                                                                                                                                                                                                                                                                                                                                                   | GP consultation rates over a two year period (July 2013-June 2015) from a matched control group from participating         |                                                                                                                                                                                                                                                                                                                                                                                                                                                                                                                                                                                                                                                                                                                                                                                                                                                                                                                                                                                 |     |     |      |    |        |                                  |                                                        |                                    |           |                                               |                    |   |      |                                                                                                                                                                                                                                                                                                                                  |                                                                   |                                                                                                                    |                                                                                                                                                                                                                                                                                                                                                                                                                                                                              |                                                                                                                                                                                |   |                                                                          |                                                                                                                                                                                                                                                                                                                                                                                                                                                                                                                                                                                                                                                                                                                                                                                                                                                                                                                                                                                                                                                                                                                                                                                                                                                                                                                                                                                                                                                                                                                                                                                                                                                                                                                                                                                                                                                                                                                                                                                                                                                                                                                                                                                                                                                                                                                                                                                                                                                                                                                                                                                                       |      |                |     |                                                                                                                                                                                                                                                                                                                                                                                                                                          |      |                                                       |              |                                                                                                                                                                 |     |                                                                                                                                                                                                                                                                                                                                                                                                                                                                                                                                                                                                                                                                                                                                  |       |                                             |                   |                                             |           |                        |               |                                                                                                                                                                                                                                                                                                                                                                                                                                                                                                                                                                                                                        |                                                                                                                                                                                                                                                                                                                         |                                                                                                                                                                                                |

|                              |                                                                                                                                                                     | <p>Control 2: -</p> <p>Baseline characteristics:</p> <table border="1" data-bbox="477 264 994 856"> <thead> <tr> <th></th> <th></th> <th>I</th> <th>C1</th> <th>C2</th> </tr> </thead> <tbody> <tr> <td>N</td> <td></td> <td>184</td> <td>302</td> <td>7540</td> </tr> <tr> <td>Age</td> <td>Median (IQR)</td> <td>56 (22)</td> <td>58 (20)</td> <td>-</td> </tr> <tr> <td>Gender</td> <td>Female %</td> <td>59</td> <td>64</td> <td>-</td> </tr> <tr> <td>Ethnicity</td> <td>White British %</td> <td>49</td> <td>58</td> <td>-</td> </tr> <tr> <td>Living arrangement</td> <td>Living Alone %</td> <td>60</td> <td>37</td> <td>-</td> </tr> <tr> <td>Employment status</td> <td>Work status Not Paid %</td> <td>91</td> <td>53</td> <td>-</td> </tr> <tr> <td>Other</td> <td>Education Up to 16 years %</td> <td>58</td> <td>39</td> <td>-</td> </tr> </tbody> </table> <p>Population: General</p>                                                                                                                                                                                                                                                                                                                                                                                         |                        |      | I       | C1                     | C2 | N |      | 184 | 302 | 7540      | Age          | Median (IQR) | 56 (22) | 58 (20)  | -    | Gender | Female %  | 59 | 64 | - | Ethnicity          | White British % | 49 | 58 | -                 | Living arrangement | Living Alone % | 60 | 37    | - | Employment status | Work status Not Paid % | 91                                                                           | 53                                                                                                                                                                                                                                                                                                                                                                                                                                                                                                                                                                                                                                                                                                                                                                                                                                                                                                                                                                                                                                                                       | -    | Other                                 | Education Up to 16 years % | 58                                            | 39   | -                                                                                                    |              | <table border="1" data-bbox="1305 176 2234 604"> <thead> <tr> <th></th> <th></th> <th></th> <th>practices</th> </tr> </thead> <tbody> <tr> <td>Who provided</td> <td>Three social prescribing coordinators (SPCs) trained in social work and employed by a third sector organization. Volunteers provided additional support to clients.</td> <td></td> <td></td> </tr> <tr> <td>How</td> <td>face-to-face</td> <td></td> <td></td> </tr> <tr> <td>Where</td> <td>22 GP surgeries</td> <td></td> <td></td> </tr> <tr> <td>When and How Much</td> <td>Up to six sessions with the SPC and as many contacts with the volunteer as required.</td> <td></td> <td></td> </tr> <tr> <td>Tailoring</td> <td>Personalised</td> <td></td> <td></td> </tr> </tbody> </table> <p>Intervention: Holistic</p> |     |                                                                                                                                   |       | practices                                                 | Who provided      | Three social prescribing coordinators (SPCs) trained in social work and employed by a third sector organization. Volunteers provided additional support to clients. |           |   | How           | face-to-face                                                                                                               |                                                                                                                                                                                                                                                                                                                                                                                                                                                    |                                                                                                                                                                                                                                                                                             | Where | 22 GP surgeries |  |  | When and How Much | Up to six sessions with the SPC and as many contacts with the volunteer as required. |  |  | Tailoring | Personalised |  |  | <p>Process of care measures at Baseline and 8 months follow-up via postal questionnaire:</p> <ul style="list-style-type: none"> <li>- Accident and emergency visits in past 3 months</li> <li>- Collected electronically and anonymously from patient health care records:</li> <li>- Annual GP consultation rate before/after referral</li> <li>- No. of medications (antidepressants, antipsychotics, anxiolytics, nonsteroidal anti-inflammatory drugs and opioid analgesics) 6 months before/after referral</li> </ul> <p>Satisfaction with service at 12 weeks and 8 months follow-up via postal questionnaire</p> |  |
|------------------------------|---------------------------------------------------------------------------------------------------------------------------------------------------------------------|----------------------------------------------------------------------------------------------------------------------------------------------------------------------------------------------------------------------------------------------------------------------------------------------------------------------------------------------------------------------------------------------------------------------------------------------------------------------------------------------------------------------------------------------------------------------------------------------------------------------------------------------------------------------------------------------------------------------------------------------------------------------------------------------------------------------------------------------------------------------------------------------------------------------------------------------------------------------------------------------------------------------------------------------------------------------------------------------------------------------------------------------------------------------------------------------------------------------------------------------------------------------------------------------|------------------------|------|---------|------------------------|----|---|------|-----|-----|-----------|--------------|--------------|---------|----------|------|--------|-----------|----|----|---|--------------------|-----------------|----|----|-------------------|--------------------|----------------|----|-------|---|-------------------|------------------------|------------------------------------------------------------------------------|--------------------------------------------------------------------------------------------------------------------------------------------------------------------------------------------------------------------------------------------------------------------------------------------------------------------------------------------------------------------------------------------------------------------------------------------------------------------------------------------------------------------------------------------------------------------------------------------------------------------------------------------------------------------------------------------------------------------------------------------------------------------------------------------------------------------------------------------------------------------------------------------------------------------------------------------------------------------------------------------------------------------------------------------------------------------------|------|---------------------------------------|----------------------------|-----------------------------------------------|------|------------------------------------------------------------------------------------------------------|--------------|--------------------------------------------------------------------------------------------------------------------------------------------------------------------------------------------------------------------------------------------------------------------------------------------------------------------------------------------------------------------------------------------------------------------------------------------------------------------------------------------------------------------------------------------------------------------------------------------------------------------------------------------------------------------------------------------------------------------------------------------------------------------------------------------------|-----|-----------------------------------------------------------------------------------------------------------------------------------|-------|-----------------------------------------------------------|-------------------|---------------------------------------------------------------------------------------------------------------------------------------------------------------------|-----------|---|---------------|----------------------------------------------------------------------------------------------------------------------------|----------------------------------------------------------------------------------------------------------------------------------------------------------------------------------------------------------------------------------------------------------------------------------------------------------------------------------------------------------------------------------------------------------------------------------------------------|---------------------------------------------------------------------------------------------------------------------------------------------------------------------------------------------------------------------------------------------------------------------------------------------|-------|-----------------|--|--|-------------------|--------------------------------------------------------------------------------------|--|--|-----------|--------------|--|--|-------------------------------------------------------------------------------------------------------------------------------------------------------------------------------------------------------------------------------------------------------------------------------------------------------------------------------------------------------------------------------------------------------------------------------------------------------------------------------------------------------------------------------------------------------------------------------------------------------------------------|--|
|                              |                                                                                                                                                                     | I                                                                                                                                                                                                                                                                                                                                                                                                                                                                                                                                                                                                                                                                                                                                                                                                                                                                                                                                                                                                                                                                                                                                                                                                                                                                                            | C1                     | C2   |         |                        |    |   |      |     |     |           |              |              |         |          |      |        |           |    |    |   |                    |                 |    |    |                   |                    |                |    |       |   |                   |                        |                                                                              |                                                                                                                                                                                                                                                                                                                                                                                                                                                                                                                                                                                                                                                                                                                                                                                                                                                                                                                                                                                                                                                                          |      |                                       |                            |                                               |      |                                                                                                      |              |                                                                                                                                                                                                                                                                                                                                                                                                                                                                                                                                                                                                                                                                                                                                                                                                  |     |                                                                                                                                   |       |                                                           |                   |                                                                                                                                                                     |           |   |               |                                                                                                                            |                                                                                                                                                                                                                                                                                                                                                                                                                                                    |                                                                                                                                                                                                                                                                                             |       |                 |  |  |                   |                                                                                      |  |  |           |              |  |  |                                                                                                                                                                                                                                                                                                                                                                                                                                                                                                                                                                                                                         |  |
| N                            |                                                                                                                                                                     | 184                                                                                                                                                                                                                                                                                                                                                                                                                                                                                                                                                                                                                                                                                                                                                                                                                                                                                                                                                                                                                                                                                                                                                                                                                                                                                          | 302                    | 7540 |         |                        |    |   |      |     |     |           |              |              |         |          |      |        |           |    |    |   |                    |                 |    |    |                   |                    |                |    |       |   |                   |                        |                                                                              |                                                                                                                                                                                                                                                                                                                                                                                                                                                                                                                                                                                                                                                                                                                                                                                                                                                                                                                                                                                                                                                                          |      |                                       |                            |                                               |      |                                                                                                      |              |                                                                                                                                                                                                                                                                                                                                                                                                                                                                                                                                                                                                                                                                                                                                                                                                  |     |                                                                                                                                   |       |                                                           |                   |                                                                                                                                                                     |           |   |               |                                                                                                                            |                                                                                                                                                                                                                                                                                                                                                                                                                                                    |                                                                                                                                                                                                                                                                                             |       |                 |  |  |                   |                                                                                      |  |  |           |              |  |  |                                                                                                                                                                                                                                                                                                                                                                                                                                                                                                                                                                                                                         |  |
| Age                          | Median (IQR)                                                                                                                                                        | 56 (22)                                                                                                                                                                                                                                                                                                                                                                                                                                                                                                                                                                                                                                                                                                                                                                                                                                                                                                                                                                                                                                                                                                                                                                                                                                                                                      | 58 (20)                | -    |         |                        |    |   |      |     |     |           |              |              |         |          |      |        |           |    |    |   |                    |                 |    |    |                   |                    |                |    |       |   |                   |                        |                                                                              |                                                                                                                                                                                                                                                                                                                                                                                                                                                                                                                                                                                                                                                                                                                                                                                                                                                                                                                                                                                                                                                                          |      |                                       |                            |                                               |      |                                                                                                      |              |                                                                                                                                                                                                                                                                                                                                                                                                                                                                                                                                                                                                                                                                                                                                                                                                  |     |                                                                                                                                   |       |                                                           |                   |                                                                                                                                                                     |           |   |               |                                                                                                                            |                                                                                                                                                                                                                                                                                                                                                                                                                                                    |                                                                                                                                                                                                                                                                                             |       |                 |  |  |                   |                                                                                      |  |  |           |              |  |  |                                                                                                                                                                                                                                                                                                                                                                                                                                                                                                                                                                                                                         |  |
| Gender                       | Female %                                                                                                                                                            | 59                                                                                                                                                                                                                                                                                                                                                                                                                                                                                                                                                                                                                                                                                                                                                                                                                                                                                                                                                                                                                                                                                                                                                                                                                                                                                           | 64                     | -    |         |                        |    |   |      |     |     |           |              |              |         |          |      |        |           |    |    |   |                    |                 |    |    |                   |                    |                |    |       |   |                   |                        |                                                                              |                                                                                                                                                                                                                                                                                                                                                                                                                                                                                                                                                                                                                                                                                                                                                                                                                                                                                                                                                                                                                                                                          |      |                                       |                            |                                               |      |                                                                                                      |              |                                                                                                                                                                                                                                                                                                                                                                                                                                                                                                                                                                                                                                                                                                                                                                                                  |     |                                                                                                                                   |       |                                                           |                   |                                                                                                                                                                     |           |   |               |                                                                                                                            |                                                                                                                                                                                                                                                                                                                                                                                                                                                    |                                                                                                                                                                                                                                                                                             |       |                 |  |  |                   |                                                                                      |  |  |           |              |  |  |                                                                                                                                                                                                                                                                                                                                                                                                                                                                                                                                                                                                                         |  |
| Ethnicity                    | White British %                                                                                                                                                     | 49                                                                                                                                                                                                                                                                                                                                                                                                                                                                                                                                                                                                                                                                                                                                                                                                                                                                                                                                                                                                                                                                                                                                                                                                                                                                                           | 58                     | -    |         |                        |    |   |      |     |     |           |              |              |         |          |      |        |           |    |    |   |                    |                 |    |    |                   |                    |                |    |       |   |                   |                        |                                                                              |                                                                                                                                                                                                                                                                                                                                                                                                                                                                                                                                                                                                                                                                                                                                                                                                                                                                                                                                                                                                                                                                          |      |                                       |                            |                                               |      |                                                                                                      |              |                                                                                                                                                                                                                                                                                                                                                                                                                                                                                                                                                                                                                                                                                                                                                                                                  |     |                                                                                                                                   |       |                                                           |                   |                                                                                                                                                                     |           |   |               |                                                                                                                            |                                                                                                                                                                                                                                                                                                                                                                                                                                                    |                                                                                                                                                                                                                                                                                             |       |                 |  |  |                   |                                                                                      |  |  |           |              |  |  |                                                                                                                                                                                                                                                                                                                                                                                                                                                                                                                                                                                                                         |  |
| Living arrangement           | Living Alone %                                                                                                                                                      | 60                                                                                                                                                                                                                                                                                                                                                                                                                                                                                                                                                                                                                                                                                                                                                                                                                                                                                                                                                                                                                                                                                                                                                                                                                                                                                           | 37                     | -    |         |                        |    |   |      |     |     |           |              |              |         |          |      |        |           |    |    |   |                    |                 |    |    |                   |                    |                |    |       |   |                   |                        |                                                                              |                                                                                                                                                                                                                                                                                                                                                                                                                                                                                                                                                                                                                                                                                                                                                                                                                                                                                                                                                                                                                                                                          |      |                                       |                            |                                               |      |                                                                                                      |              |                                                                                                                                                                                                                                                                                                                                                                                                                                                                                                                                                                                                                                                                                                                                                                                                  |     |                                                                                                                                   |       |                                                           |                   |                                                                                                                                                                     |           |   |               |                                                                                                                            |                                                                                                                                                                                                                                                                                                                                                                                                                                                    |                                                                                                                                                                                                                                                                                             |       |                 |  |  |                   |                                                                                      |  |  |           |              |  |  |                                                                                                                                                                                                                                                                                                                                                                                                                                                                                                                                                                                                                         |  |
| Employment status            | Work status Not Paid %                                                                                                                                              | 91                                                                                                                                                                                                                                                                                                                                                                                                                                                                                                                                                                                                                                                                                                                                                                                                                                                                                                                                                                                                                                                                                                                                                                                                                                                                                           | 53                     | -    |         |                        |    |   |      |     |     |           |              |              |         |          |      |        |           |    |    |   |                    |                 |    |    |                   |                    |                |    |       |   |                   |                        |                                                                              |                                                                                                                                                                                                                                                                                                                                                                                                                                                                                                                                                                                                                                                                                                                                                                                                                                                                                                                                                                                                                                                                          |      |                                       |                            |                                               |      |                                                                                                      |              |                                                                                                                                                                                                                                                                                                                                                                                                                                                                                                                                                                                                                                                                                                                                                                                                  |     |                                                                                                                                   |       |                                                           |                   |                                                                                                                                                                     |           |   |               |                                                                                                                            |                                                                                                                                                                                                                                                                                                                                                                                                                                                    |                                                                                                                                                                                                                                                                                             |       |                 |  |  |                   |                                                                                      |  |  |           |              |  |  |                                                                                                                                                                                                                                                                                                                                                                                                                                                                                                                                                                                                                         |  |
| Other                        | Education Up to 16 years %                                                                                                                                          | 58                                                                                                                                                                                                                                                                                                                                                                                                                                                                                                                                                                                                                                                                                                                                                                                                                                                                                                                                                                                                                                                                                                                                                                                                                                                                                           | 39                     | -    |         |                        |    |   |      |     |     |           |              |              |         |          |      |        |           |    |    |   |                    |                 |    |    |                   |                    |                |    |       |   |                   |                        |                                                                              |                                                                                                                                                                                                                                                                                                                                                                                                                                                                                                                                                                                                                                                                                                                                                                                                                                                                                                                                                                                                                                                                          |      |                                       |                            |                                               |      |                                                                                                      |              |                                                                                                                                                                                                                                                                                                                                                                                                                                                                                                                                                                                                                                                                                                                                                                                                  |     |                                                                                                                                   |       |                                                           |                   |                                                                                                                                                                     |           |   |               |                                                                                                                            |                                                                                                                                                                                                                                                                                                                                                                                                                                                    |                                                                                                                                                                                                                                                                                             |       |                 |  |  |                   |                                                                                      |  |  |           |              |  |  |                                                                                                                                                                                                                                                                                                                                                                                                                                                                                                                                                                                                                         |  |
|                              |                                                                                                                                                                     |                                                                                                                                                                                                                                                                                                                                                                                                                                                                                                                                                                                                                                                                                                                                                                                                                                                                                                                                                                                                                                                                                                                                                                                                                                                                                              | practices              |      |         |                        |    |   |      |     |     |           |              |              |         |          |      |        |           |    |    |   |                    |                 |    |    |                   |                    |                |    |       |   |                   |                        |                                                                              |                                                                                                                                                                                                                                                                                                                                                                                                                                                                                                                                                                                                                                                                                                                                                                                                                                                                                                                                                                                                                                                                          |      |                                       |                            |                                               |      |                                                                                                      |              |                                                                                                                                                                                                                                                                                                                                                                                                                                                                                                                                                                                                                                                                                                                                                                                                  |     |                                                                                                                                   |       |                                                           |                   |                                                                                                                                                                     |           |   |               |                                                                                                                            |                                                                                                                                                                                                                                                                                                                                                                                                                                                    |                                                                                                                                                                                                                                                                                             |       |                 |  |  |                   |                                                                                      |  |  |           |              |  |  |                                                                                                                                                                                                                                                                                                                                                                                                                                                                                                                                                                                                                         |  |
| Who provided                 | Three social prescribing coordinators (SPCs) trained in social work and employed by a third sector organization. Volunteers provided additional support to clients. |                                                                                                                                                                                                                                                                                                                                                                                                                                                                                                                                                                                                                                                                                                                                                                                                                                                                                                                                                                                                                                                                                                                                                                                                                                                                                              |                        |      |         |                        |    |   |      |     |     |           |              |              |         |          |      |        |           |    |    |   |                    |                 |    |    |                   |                    |                |    |       |   |                   |                        |                                                                              |                                                                                                                                                                                                                                                                                                                                                                                                                                                                                                                                                                                                                                                                                                                                                                                                                                                                                                                                                                                                                                                                          |      |                                       |                            |                                               |      |                                                                                                      |              |                                                                                                                                                                                                                                                                                                                                                                                                                                                                                                                                                                                                                                                                                                                                                                                                  |     |                                                                                                                                   |       |                                                           |                   |                                                                                                                                                                     |           |   |               |                                                                                                                            |                                                                                                                                                                                                                                                                                                                                                                                                                                                    |                                                                                                                                                                                                                                                                                             |       |                 |  |  |                   |                                                                                      |  |  |           |              |  |  |                                                                                                                                                                                                                                                                                                                                                                                                                                                                                                                                                                                                                         |  |
| How                          | face-to-face                                                                                                                                                        |                                                                                                                                                                                                                                                                                                                                                                                                                                                                                                                                                                                                                                                                                                                                                                                                                                                                                                                                                                                                                                                                                                                                                                                                                                                                                              |                        |      |         |                        |    |   |      |     |     |           |              |              |         |          |      |        |           |    |    |   |                    |                 |    |    |                   |                    |                |    |       |   |                   |                        |                                                                              |                                                                                                                                                                                                                                                                                                                                                                                                                                                                                                                                                                                                                                                                                                                                                                                                                                                                                                                                                                                                                                                                          |      |                                       |                            |                                               |      |                                                                                                      |              |                                                                                                                                                                                                                                                                                                                                                                                                                                                                                                                                                                                                                                                                                                                                                                                                  |     |                                                                                                                                   |       |                                                           |                   |                                                                                                                                                                     |           |   |               |                                                                                                                            |                                                                                                                                                                                                                                                                                                                                                                                                                                                    |                                                                                                                                                                                                                                                                                             |       |                 |  |  |                   |                                                                                      |  |  |           |              |  |  |                                                                                                                                                                                                                                                                                                                                                                                                                                                                                                                                                                                                                         |  |
| Where                        | 22 GP surgeries                                                                                                                                                     |                                                                                                                                                                                                                                                                                                                                                                                                                                                                                                                                                                                                                                                                                                                                                                                                                                                                                                                                                                                                                                                                                                                                                                                                                                                                                              |                        |      |         |                        |    |   |      |     |     |           |              |              |         |          |      |        |           |    |    |   |                    |                 |    |    |                   |                    |                |    |       |   |                   |                        |                                                                              |                                                                                                                                                                                                                                                                                                                                                                                                                                                                                                                                                                                                                                                                                                                                                                                                                                                                                                                                                                                                                                                                          |      |                                       |                            |                                               |      |                                                                                                      |              |                                                                                                                                                                                                                                                                                                                                                                                                                                                                                                                                                                                                                                                                                                                                                                                                  |     |                                                                                                                                   |       |                                                           |                   |                                                                                                                                                                     |           |   |               |                                                                                                                            |                                                                                                                                                                                                                                                                                                                                                                                                                                                    |                                                                                                                                                                                                                                                                                             |       |                 |  |  |                   |                                                                                      |  |  |           |              |  |  |                                                                                                                                                                                                                                                                                                                                                                                                                                                                                                                                                                                                                         |  |
| When and How Much            | Up to six sessions with the SPC and as many contacts with the volunteer as required.                                                                                |                                                                                                                                                                                                                                                                                                                                                                                                                                                                                                                                                                                                                                                                                                                                                                                                                                                                                                                                                                                                                                                                                                                                                                                                                                                                                              |                        |      |         |                        |    |   |      |     |     |           |              |              |         |          |      |        |           |    |    |   |                    |                 |    |    |                   |                    |                |    |       |   |                   |                        |                                                                              |                                                                                                                                                                                                                                                                                                                                                                                                                                                                                                                                                                                                                                                                                                                                                                                                                                                                                                                                                                                                                                                                          |      |                                       |                            |                                               |      |                                                                                                      |              |                                                                                                                                                                                                                                                                                                                                                                                                                                                                                                                                                                                                                                                                                                                                                                                                  |     |                                                                                                                                   |       |                                                           |                   |                                                                                                                                                                     |           |   |               |                                                                                                                            |                                                                                                                                                                                                                                                                                                                                                                                                                                                    |                                                                                                                                                                                                                                                                                             |       |                 |  |  |                   |                                                                                      |  |  |           |              |  |  |                                                                                                                                                                                                                                                                                                                                                                                                                                                                                                                                                                                                                         |  |
| Tailoring                    | Personalised                                                                                                                                                        |                                                                                                                                                                                                                                                                                                                                                                                                                                                                                                                                                                                                                                                                                                                                                                                                                                                                                                                                                                                                                                                                                                                                                                                                                                                                                              |                        |      |         |                        |    |   |      |     |     |           |              |              |         |          |      |        |           |    |    |   |                    |                 |    |    |                   |                    |                |    |       |   |                   |                        |                                                                              |                                                                                                                                                                                                                                                                                                                                                                                                                                                                                                                                                                                                                                                                                                                                                                                                                                                                                                                                                                                                                                                                          |      |                                       |                            |                                               |      |                                                                                                      |              |                                                                                                                                                                                                                                                                                                                                                                                                                                                                                                                                                                                                                                                                                                                                                                                                  |     |                                                                                                                                   |       |                                                           |                   |                                                                                                                                                                     |           |   |               |                                                                                                                            |                                                                                                                                                                                                                                                                                                                                                                                                                                                    |                                                                                                                                                                                                                                                                                             |       |                 |  |  |                   |                                                                                      |  |  |           |              |  |  |                                                                                                                                                                                                                                                                                                                                                                                                                                                                                                                                                                                                                         |  |
| <p>Crone 2018 (14,47,48)</p> | <p>Uncontrolled before-and-after study</p> <p>Study length: -</p>                                                                                                   | <p><b>Inclusion criteria:</b></p> <p>Patients could be referred for any of up to seven reasons:</p> <ul style="list-style-type: none"> <li>- reduce stress/anxiety/depression</li> <li>- improve self-esteem/confidence</li> <li>- improve social networks</li> <li>- help alleviate symptoms of chronic pain or illness</li> <li>- distraction from behaviour related health issues</li> <li>- improve overall wellbeing</li> <li>- support following loss or major life change</li> </ul> <p><b>Exclusion criteria: -</b></p> <p>Baseline characteristics:</p> <table border="1" data-bbox="477 1327 1074 1793"> <thead> <tr> <th></th> <th></th> <th>Overall</th> <th>Subgroup: Multi-morbid</th> </tr> </thead> <tbody> <tr> <td>N</td> <td></td> <td>1297</td> <td>103</td> </tr> <tr> <td>Age</td> <td>Mean (SD)</td> <td>51.1 (15.87)</td> <td>53.2 (14.08)</td> </tr> <tr> <td>Gender</td> <td>Female %</td> <td>77.3</td> <td>82.5</td> </tr> <tr> <td>Ethnicity</td> <td>-</td> <td>-</td> <td>-</td> </tr> <tr> <td>Living arrangement</td> <td>-</td> <td>-</td> <td>-</td> </tr> <tr> <td>Employment status</td> <td>Not working %</td> <td>11.9</td> <td>51</td> </tr> <tr> <td>Other</td> <td>-</td> <td>-</td> <td>-</td> </tr> </tbody> </table> <p>Population: General</p> |                        |      | Overall | Subgroup: Multi-morbid | N  |   | 1297 | 103 | Age | Mean (SD) | 51.1 (15.87) | 53.2 (14.08) | Gender  | Female % | 77.3 | 82.5   | Ethnicity | -  | -  | - | Living arrangement | -               | -  | -  | Employment status | Not working %      | 11.9           | 51 | Other | - | -                 | -                      | <p>Primary care</p> <p>Country: UK (Gloucestershire, South West England)</p> | <table border="1" data-bbox="1305 999 2234 1535"> <tbody> <tr> <td>Name</td> <td>Artlift arts-on-referral intervention</td> </tr> <tr> <td>Why</td> <td>Improve the health and well-being of patients</td> </tr> <tr> <td>What</td> <td>Range of visual and creative arts were offered (e.g. poetry, ceramics, drawing, mosaic and painting)</td> </tr> <tr> <td>Who provided</td> <td>8 different artists, mostly within surgeries</td> </tr> <tr> <td>How</td> <td>Patients were recruited to the intervention by their GP or other health professional, using a specifically designed referral form</td> </tr> <tr> <td>Where</td> <td>Within surgeries, some were based in community facilities</td> </tr> <tr> <td>When and How Much</td> <td>8 (10) weeks, group size between 3-10 patients</td> </tr> <tr> <td>Tailoring</td> <td>-</td> </tr> <tr> <td>Modifications</td> <td>Duration was 10 weeks from 2009 until August 2013 when it changed to 8 weeks to enable more patients to access the program</td> </tr> </tbody> </table> <p>Intervention: Light</p> | Name | Artlift arts-on-referral intervention | Why                        | Improve the health and well-being of patients | What | Range of visual and creative arts were offered (e.g. poetry, ceramics, drawing, mosaic and painting) | Who provided | 8 different artists, mostly within surgeries                                                                                                                                                                                                                                                                                                                                                                                                                                                                                                                                                                                                                                                                                                                                                     | How | Patients were recruited to the intervention by their GP or other health professional, using a specifically designed referral form | Where | Within surgeries, some were based in community facilities | When and How Much | 8 (10) weeks, group size between 3-10 patients                                                                                                                      | Tailoring | - | Modifications | Duration was 10 weeks from 2009 until August 2013 when it changed to 8 weeks to enable more patients to access the program | <p>Patient outcomes at baseline (week 1) and 8-/10-weeks follow-up (collected by the artists through the anonymised patient referral form):</p> <ul style="list-style-type: none"> <li>- Warwick Edinburgh Mental Wellbeing Scale (WEMWBS, but adopted for the study)</li> </ul> <p>Subgroup analysis:</p> <ul style="list-style-type: none"> <li>- completers</li> <li>- partial-, Non-Completers and Non-attenders</li> <li>- engaged</li> </ul> | <p>Peer-Review: yes (all)</p> <p>Funding source:</p> <p>For the completion of this analysis update there has been no external funding sought or received. The original evaluation was funded by NHS Gloucestershire Public Health.</p> <p>Declaration of interest:</p> <p>None declared</p> |       |                 |  |  |                   |                                                                                      |  |  |           |              |  |  |                                                                                                                                                                                                                                                                                                                                                                                                                                                                                                                                                                                                                         |  |
|                              |                                                                                                                                                                     | Overall                                                                                                                                                                                                                                                                                                                                                                                                                                                                                                                                                                                                                                                                                                                                                                                                                                                                                                                                                                                                                                                                                                                                                                                                                                                                                      | Subgroup: Multi-morbid |      |         |                        |    |   |      |     |     |           |              |              |         |          |      |        |           |    |    |   |                    |                 |    |    |                   |                    |                |    |       |   |                   |                        |                                                                              |                                                                                                                                                                                                                                                                                                                                                                                                                                                                                                                                                                                                                                                                                                                                                                                                                                                                                                                                                                                                                                                                          |      |                                       |                            |                                               |      |                                                                                                      |              |                                                                                                                                                                                                                                                                                                                                                                                                                                                                                                                                                                                                                                                                                                                                                                                                  |     |                                                                                                                                   |       |                                                           |                   |                                                                                                                                                                     |           |   |               |                                                                                                                            |                                                                                                                                                                                                                                                                                                                                                                                                                                                    |                                                                                                                                                                                                                                                                                             |       |                 |  |  |                   |                                                                                      |  |  |           |              |  |  |                                                                                                                                                                                                                                                                                                                                                                                                                                                                                                                                                                                                                         |  |
| N                            |                                                                                                                                                                     | 1297                                                                                                                                                                                                                                                                                                                                                                                                                                                                                                                                                                                                                                                                                                                                                                                                                                                                                                                                                                                                                                                                                                                                                                                                                                                                                         | 103                    |      |         |                        |    |   |      |     |     |           |              |              |         |          |      |        |           |    |    |   |                    |                 |    |    |                   |                    |                |    |       |   |                   |                        |                                                                              |                                                                                                                                                                                                                                                                                                                                                                                                                                                                                                                                                                                                                                                                                                                                                                                                                                                                                                                                                                                                                                                                          |      |                                       |                            |                                               |      |                                                                                                      |              |                                                                                                                                                                                                                                                                                                                                                                                                                                                                                                                                                                                                                                                                                                                                                                                                  |     |                                                                                                                                   |       |                                                           |                   |                                                                                                                                                                     |           |   |               |                                                                                                                            |                                                                                                                                                                                                                                                                                                                                                                                                                                                    |                                                                                                                                                                                                                                                                                             |       |                 |  |  |                   |                                                                                      |  |  |           |              |  |  |                                                                                                                                                                                                                                                                                                                                                                                                                                                                                                                                                                                                                         |  |
| Age                          | Mean (SD)                                                                                                                                                           | 51.1 (15.87)                                                                                                                                                                                                                                                                                                                                                                                                                                                                                                                                                                                                                                                                                                                                                                                                                                                                                                                                                                                                                                                                                                                                                                                                                                                                                 | 53.2 (14.08)           |      |         |                        |    |   |      |     |     |           |              |              |         |          |      |        |           |    |    |   |                    |                 |    |    |                   |                    |                |    |       |   |                   |                        |                                                                              |                                                                                                                                                                                                                                                                                                                                                                                                                                                                                                                                                                                                                                                                                                                                                                                                                                                                                                                                                                                                                                                                          |      |                                       |                            |                                               |      |                                                                                                      |              |                                                                                                                                                                                                                                                                                                                                                                                                                                                                                                                                                                                                                                                                                                                                                                                                  |     |                                                                                                                                   |       |                                                           |                   |                                                                                                                                                                     |           |   |               |                                                                                                                            |                                                                                                                                                                                                                                                                                                                                                                                                                                                    |                                                                                                                                                                                                                                                                                             |       |                 |  |  |                   |                                                                                      |  |  |           |              |  |  |                                                                                                                                                                                                                                                                                                                                                                                                                                                                                                                                                                                                                         |  |
| Gender                       | Female %                                                                                                                                                            | 77.3                                                                                                                                                                                                                                                                                                                                                                                                                                                                                                                                                                                                                                                                                                                                                                                                                                                                                                                                                                                                                                                                                                                                                                                                                                                                                         | 82.5                   |      |         |                        |    |   |      |     |     |           |              |              |         |          |      |        |           |    |    |   |                    |                 |    |    |                   |                    |                |    |       |   |                   |                        |                                                                              |                                                                                                                                                                                                                                                                                                                                                                                                                                                                                                                                                                                                                                                                                                                                                                                                                                                                                                                                                                                                                                                                          |      |                                       |                            |                                               |      |                                                                                                      |              |                                                                                                                                                                                                                                                                                                                                                                                                                                                                                                                                                                                                                                                                                                                                                                                                  |     |                                                                                                                                   |       |                                                           |                   |                                                                                                                                                                     |           |   |               |                                                                                                                            |                                                                                                                                                                                                                                                                                                                                                                                                                                                    |                                                                                                                                                                                                                                                                                             |       |                 |  |  |                   |                                                                                      |  |  |           |              |  |  |                                                                                                                                                                                                                                                                                                                                                                                                                                                                                                                                                                                                                         |  |
| Ethnicity                    | -                                                                                                                                                                   | -                                                                                                                                                                                                                                                                                                                                                                                                                                                                                                                                                                                                                                                                                                                                                                                                                                                                                                                                                                                                                                                                                                                                                                                                                                                                                            | -                      |      |         |                        |    |   |      |     |     |           |              |              |         |          |      |        |           |    |    |   |                    |                 |    |    |                   |                    |                |    |       |   |                   |                        |                                                                              |                                                                                                                                                                                                                                                                                                                                                                                                                                                                                                                                                                                                                                                                                                                                                                                                                                                                                                                                                                                                                                                                          |      |                                       |                            |                                               |      |                                                                                                      |              |                                                                                                                                                                                                                                                                                                                                                                                                                                                                                                                                                                                                                                                                                                                                                                                                  |     |                                                                                                                                   |       |                                                           |                   |                                                                                                                                                                     |           |   |               |                                                                                                                            |                                                                                                                                                                                                                                                                                                                                                                                                                                                    |                                                                                                                                                                                                                                                                                             |       |                 |  |  |                   |                                                                                      |  |  |           |              |  |  |                                                                                                                                                                                                                                                                                                                                                                                                                                                                                                                                                                                                                         |  |
| Living arrangement           | -                                                                                                                                                                   | -                                                                                                                                                                                                                                                                                                                                                                                                                                                                                                                                                                                                                                                                                                                                                                                                                                                                                                                                                                                                                                                                                                                                                                                                                                                                                            | -                      |      |         |                        |    |   |      |     |     |           |              |              |         |          |      |        |           |    |    |   |                    |                 |    |    |                   |                    |                |    |       |   |                   |                        |                                                                              |                                                                                                                                                                                                                                                                                                                                                                                                                                                                                                                                                                                                                                                                                                                                                                                                                                                                                                                                                                                                                                                                          |      |                                       |                            |                                               |      |                                                                                                      |              |                                                                                                                                                                                                                                                                                                                                                                                                                                                                                                                                                                                                                                                                                                                                                                                                  |     |                                                                                                                                   |       |                                                           |                   |                                                                                                                                                                     |           |   |               |                                                                                                                            |                                                                                                                                                                                                                                                                                                                                                                                                                                                    |                                                                                                                                                                                                                                                                                             |       |                 |  |  |                   |                                                                                      |  |  |           |              |  |  |                                                                                                                                                                                                                                                                                                                                                                                                                                                                                                                                                                                                                         |  |
| Employment status            | Not working %                                                                                                                                                       | 11.9                                                                                                                                                                                                                                                                                                                                                                                                                                                                                                                                                                                                                                                                                                                                                                                                                                                                                                                                                                                                                                                                                                                                                                                                                                                                                         | 51                     |      |         |                        |    |   |      |     |     |           |              |              |         |          |      |        |           |    |    |   |                    |                 |    |    |                   |                    |                |    |       |   |                   |                        |                                                                              |                                                                                                                                                                                                                                                                                                                                                                                                                                                                                                                                                                                                                                                                                                                                                                                                                                                                                                                                                                                                                                                                          |      |                                       |                            |                                               |      |                                                                                                      |              |                                                                                                                                                                                                                                                                                                                                                                                                                                                                                                                                                                                                                                                                                                                                                                                                  |     |                                                                                                                                   |       |                                                           |                   |                                                                                                                                                                     |           |   |               |                                                                                                                            |                                                                                                                                                                                                                                                                                                                                                                                                                                                    |                                                                                                                                                                                                                                                                                             |       |                 |  |  |                   |                                                                                      |  |  |           |              |  |  |                                                                                                                                                                                                                                                                                                                                                                                                                                                                                                                                                                                                                         |  |
| Other                        | -                                                                                                                                                                   | -                                                                                                                                                                                                                                                                                                                                                                                                                                                                                                                                                                                                                                                                                                                                                                                                                                                                                                                                                                                                                                                                                                                                                                                                                                                                                            | -                      |      |         |                        |    |   |      |     |     |           |              |              |         |          |      |        |           |    |    |   |                    |                 |    |    |                   |                    |                |    |       |   |                   |                        |                                                                              |                                                                                                                                                                                                                                                                                                                                                                                                                                                                                                                                                                                                                                                                                                                                                                                                                                                                                                                                                                                                                                                                          |      |                                       |                            |                                               |      |                                                                                                      |              |                                                                                                                                                                                                                                                                                                                                                                                                                                                                                                                                                                                                                                                                                                                                                                                                  |     |                                                                                                                                   |       |                                                           |                   |                                                                                                                                                                     |           |   |               |                                                                                                                            |                                                                                                                                                                                                                                                                                                                                                                                                                                                    |                                                                                                                                                                                                                                                                                             |       |                 |  |  |                   |                                                                                      |  |  |           |              |  |  |                                                                                                                                                                                                                                                                                                                                                                                                                                                                                                                                                                                                                         |  |
| Name                         | Artlift arts-on-referral intervention                                                                                                                               |                                                                                                                                                                                                                                                                                                                                                                                                                                                                                                                                                                                                                                                                                                                                                                                                                                                                                                                                                                                                                                                                                                                                                                                                                                                                                              |                        |      |         |                        |    |   |      |     |     |           |              |              |         |          |      |        |           |    |    |   |                    |                 |    |    |                   |                    |                |    |       |   |                   |                        |                                                                              |                                                                                                                                                                                                                                                                                                                                                                                                                                                                                                                                                                                                                                                                                                                                                                                                                                                                                                                                                                                                                                                                          |      |                                       |                            |                                               |      |                                                                                                      |              |                                                                                                                                                                                                                                                                                                                                                                                                                                                                                                                                                                                                                                                                                                                                                                                                  |     |                                                                                                                                   |       |                                                           |                   |                                                                                                                                                                     |           |   |               |                                                                                                                            |                                                                                                                                                                                                                                                                                                                                                                                                                                                    |                                                                                                                                                                                                                                                                                             |       |                 |  |  |                   |                                                                                      |  |  |           |              |  |  |                                                                                                                                                                                                                                                                                                                                                                                                                                                                                                                                                                                                                         |  |
| Why                          | Improve the health and well-being of patients                                                                                                                       |                                                                                                                                                                                                                                                                                                                                                                                                                                                                                                                                                                                                                                                                                                                                                                                                                                                                                                                                                                                                                                                                                                                                                                                                                                                                                              |                        |      |         |                        |    |   |      |     |     |           |              |              |         |          |      |        |           |    |    |   |                    |                 |    |    |                   |                    |                |    |       |   |                   |                        |                                                                              |                                                                                                                                                                                                                                                                                                                                                                                                                                                                                                                                                                                                                                                                                                                                                                                                                                                                                                                                                                                                                                                                          |      |                                       |                            |                                               |      |                                                                                                      |              |                                                                                                                                                                                                                                                                                                                                                                                                                                                                                                                                                                                                                                                                                                                                                                                                  |     |                                                                                                                                   |       |                                                           |                   |                                                                                                                                                                     |           |   |               |                                                                                                                            |                                                                                                                                                                                                                                                                                                                                                                                                                                                    |                                                                                                                                                                                                                                                                                             |       |                 |  |  |                   |                                                                                      |  |  |           |              |  |  |                                                                                                                                                                                                                                                                                                                                                                                                                                                                                                                                                                                                                         |  |
| What                         | Range of visual and creative arts were offered (e.g. poetry, ceramics, drawing, mosaic and painting)                                                                |                                                                                                                                                                                                                                                                                                                                                                                                                                                                                                                                                                                                                                                                                                                                                                                                                                                                                                                                                                                                                                                                                                                                                                                                                                                                                              |                        |      |         |                        |    |   |      |     |     |           |              |              |         |          |      |        |           |    |    |   |                    |                 |    |    |                   |                    |                |    |       |   |                   |                        |                                                                              |                                                                                                                                                                                                                                                                                                                                                                                                                                                                                                                                                                                                                                                                                                                                                                                                                                                                                                                                                                                                                                                                          |      |                                       |                            |                                               |      |                                                                                                      |              |                                                                                                                                                                                                                                                                                                                                                                                                                                                                                                                                                                                                                                                                                                                                                                                                  |     |                                                                                                                                   |       |                                                           |                   |                                                                                                                                                                     |           |   |               |                                                                                                                            |                                                                                                                                                                                                                                                                                                                                                                                                                                                    |                                                                                                                                                                                                                                                                                             |       |                 |  |  |                   |                                                                                      |  |  |           |              |  |  |                                                                                                                                                                                                                                                                                                                                                                                                                                                                                                                                                                                                                         |  |
| Who provided                 | 8 different artists, mostly within surgeries                                                                                                                        |                                                                                                                                                                                                                                                                                                                                                                                                                                                                                                                                                                                                                                                                                                                                                                                                                                                                                                                                                                                                                                                                                                                                                                                                                                                                                              |                        |      |         |                        |    |   |      |     |     |           |              |              |         |          |      |        |           |    |    |   |                    |                 |    |    |                   |                    |                |    |       |   |                   |                        |                                                                              |                                                                                                                                                                                                                                                                                                                                                                                                                                                                                                                                                                                                                                                                                                                                                                                                                                                                                                                                                                                                                                                                          |      |                                       |                            |                                               |      |                                                                                                      |              |                                                                                                                                                                                                                                                                                                                                                                                                                                                                                                                                                                                                                                                                                                                                                                                                  |     |                                                                                                                                   |       |                                                           |                   |                                                                                                                                                                     |           |   |               |                                                                                                                            |                                                                                                                                                                                                                                                                                                                                                                                                                                                    |                                                                                                                                                                                                                                                                                             |       |                 |  |  |                   |                                                                                      |  |  |           |              |  |  |                                                                                                                                                                                                                                                                                                                                                                                                                                                                                                                                                                                                                         |  |
| How                          | Patients were recruited to the intervention by their GP or other health professional, using a specifically designed referral form                                   |                                                                                                                                                                                                                                                                                                                                                                                                                                                                                                                                                                                                                                                                                                                                                                                                                                                                                                                                                                                                                                                                                                                                                                                                                                                                                              |                        |      |         |                        |    |   |      |     |     |           |              |              |         |          |      |        |           |    |    |   |                    |                 |    |    |                   |                    |                |    |       |   |                   |                        |                                                                              |                                                                                                                                                                                                                                                                                                                                                                                                                                                                                                                                                                                                                                                                                                                                                                                                                                                                                                                                                                                                                                                                          |      |                                       |                            |                                               |      |                                                                                                      |              |                                                                                                                                                                                                                                                                                                                                                                                                                                                                                                                                                                                                                                                                                                                                                                                                  |     |                                                                                                                                   |       |                                                           |                   |                                                                                                                                                                     |           |   |               |                                                                                                                            |                                                                                                                                                                                                                                                                                                                                                                                                                                                    |                                                                                                                                                                                                                                                                                             |       |                 |  |  |                   |                                                                                      |  |  |           |              |  |  |                                                                                                                                                                                                                                                                                                                                                                                                                                                                                                                                                                                                                         |  |
| Where                        | Within surgeries, some were based in community facilities                                                                                                           |                                                                                                                                                                                                                                                                                                                                                                                                                                                                                                                                                                                                                                                                                                                                                                                                                                                                                                                                                                                                                                                                                                                                                                                                                                                                                              |                        |      |         |                        |    |   |      |     |     |           |              |              |         |          |      |        |           |    |    |   |                    |                 |    |    |                   |                    |                |    |       |   |                   |                        |                                                                              |                                                                                                                                                                                                                                                                                                                                                                                                                                                                                                                                                                                                                                                                                                                                                                                                                                                                                                                                                                                                                                                                          |      |                                       |                            |                                               |      |                                                                                                      |              |                                                                                                                                                                                                                                                                                                                                                                                                                                                                                                                                                                                                                                                                                                                                                                                                  |     |                                                                                                                                   |       |                                                           |                   |                                                                                                                                                                     |           |   |               |                                                                                                                            |                                                                                                                                                                                                                                                                                                                                                                                                                                                    |                                                                                                                                                                                                                                                                                             |       |                 |  |  |                   |                                                                                      |  |  |           |              |  |  |                                                                                                                                                                                                                                                                                                                                                                                                                                                                                                                                                                                                                         |  |
| When and How Much            | 8 (10) weeks, group size between 3-10 patients                                                                                                                      |                                                                                                                                                                                                                                                                                                                                                                                                                                                                                                                                                                                                                                                                                                                                                                                                                                                                                                                                                                                                                                                                                                                                                                                                                                                                                              |                        |      |         |                        |    |   |      |     |     |           |              |              |         |          |      |        |           |    |    |   |                    |                 |    |    |                   |                    |                |    |       |   |                   |                        |                                                                              |                                                                                                                                                                                                                                                                                                                                                                                                                                                                                                                                                                                                                                                                                                                                                                                                                                                                                                                                                                                                                                                                          |      |                                       |                            |                                               |      |                                                                                                      |              |                                                                                                                                                                                                                                                                                                                                                                                                                                                                                                                                                                                                                                                                                                                                                                                                  |     |                                                                                                                                   |       |                                                           |                   |                                                                                                                                                                     |           |   |               |                                                                                                                            |                                                                                                                                                                                                                                                                                                                                                                                                                                                    |                                                                                                                                                                                                                                                                                             |       |                 |  |  |                   |                                                                                      |  |  |           |              |  |  |                                                                                                                                                                                                                                                                                                                                                                                                                                                                                                                                                                                                                         |  |
| Tailoring                    | -                                                                                                                                                                   |                                                                                                                                                                                                                                                                                                                                                                                                                                                                                                                                                                                                                                                                                                                                                                                                                                                                                                                                                                                                                                                                                                                                                                                                                                                                                              |                        |      |         |                        |    |   |      |     |     |           |              |              |         |          |      |        |           |    |    |   |                    |                 |    |    |                   |                    |                |    |       |   |                   |                        |                                                                              |                                                                                                                                                                                                                                                                                                                                                                                                                                                                                                                                                                                                                                                                                                                                                                                                                                                                                                                                                                                                                                                                          |      |                                       |                            |                                               |      |                                                                                                      |              |                                                                                                                                                                                                                                                                                                                                                                                                                                                                                                                                                                                                                                                                                                                                                                                                  |     |                                                                                                                                   |       |                                                           |                   |                                                                                                                                                                     |           |   |               |                                                                                                                            |                                                                                                                                                                                                                                                                                                                                                                                                                                                    |                                                                                                                                                                                                                                                                                             |       |                 |  |  |                   |                                                                                      |  |  |           |              |  |  |                                                                                                                                                                                                                                                                                                                                                                                                                                                                                                                                                                                                                         |  |
| Modifications                | Duration was 10 weeks from 2009 until August 2013 when it changed to 8 weeks to enable more patients to access the program                                          |                                                                                                                                                                                                                                                                                                                                                                                                                                                                                                                                                                                                                                                                                                                                                                                                                                                                                                                                                                                                                                                                                                                                                                                                                                                                                              |                        |      |         |                        |    |   |      |     |     |           |              |              |         |          |      |        |           |    |    |   |                    |                 |    |    |                   |                    |                |    |       |   |                   |                        |                                                                              |                                                                                                                                                                                                                                                                                                                                                                                                                                                                                                                                                                                                                                                                                                                                                                                                                                                                                                                                                                                                                                                                          |      |                                       |                            |                                               |      |                                                                                                      |              |                                                                                                                                                                                                                                                                                                                                                                                                                                                                                                                                                                                                                                                                                                                                                                                                  |     |                                                                                                                                   |       |                                                           |                   |                                                                                                                                                                     |           |   |               |                                                                                                                            |                                                                                                                                                                                                                                                                                                                                                                                                                                                    |                                                                                                                                                                                                                                                                                             |       |                 |  |  |                   |                                                                                      |  |  |           |              |  |  |                                                                                                                                                                                                                                                                                                                                                                                                                                                                                                                                                                                                                         |  |

|                                         |                                                                                                                                                                                                                                                                                                                                                                                                                                                                                                                                                                                                          |                                                                                                                                                                                                                                                                                                                                                                                                                                                                                                                                                                                                                                                                                                   |   |  |      |     |                    |    |        |          |    |           |                 |      |                    |  |   |                   |  |   |       |  |   |                                                                                               |                                                                                                                                                                                                                                                                                                                                                                                                                                                                                                                                                                                                                                                                                                                                                                                                                                                                                                                                                                                                                                                                                                                                                                                                                                                                                                                                                                                                                                                                                                                                                                                                                                                                                                                                                                                                                                                                                                                                          |      |                                    |     |                                                                                                                                                                                                                                                                                                                       |      |                                                                                                                                                                                                                                                                                                                                                                                                                                                                                                                                                                                                          |              |                                                                       |     |                                                                                                                                                                                                                                                                |       |                          |                   |   |           |                              |               |                                                                                                                            |                                                                                                                                                                                                                                                                                                                                                                                                                                                                                                                                                                                                                                                                                                                                                                                                                                                                                                                                                                                                                                                                                                        |                                                                                                                                                |
|-----------------------------------------|----------------------------------------------------------------------------------------------------------------------------------------------------------------------------------------------------------------------------------------------------------------------------------------------------------------------------------------------------------------------------------------------------------------------------------------------------------------------------------------------------------------------------------------------------------------------------------------------------------|---------------------------------------------------------------------------------------------------------------------------------------------------------------------------------------------------------------------------------------------------------------------------------------------------------------------------------------------------------------------------------------------------------------------------------------------------------------------------------------------------------------------------------------------------------------------------------------------------------------------------------------------------------------------------------------------------|---|--|------|-----|--------------------|----|--------|----------|----|-----------|-----------------|------|--------------------|--|---|-------------------|--|---|-------|--|---|-----------------------------------------------------------------------------------------------|------------------------------------------------------------------------------------------------------------------------------------------------------------------------------------------------------------------------------------------------------------------------------------------------------------------------------------------------------------------------------------------------------------------------------------------------------------------------------------------------------------------------------------------------------------------------------------------------------------------------------------------------------------------------------------------------------------------------------------------------------------------------------------------------------------------------------------------------------------------------------------------------------------------------------------------------------------------------------------------------------------------------------------------------------------------------------------------------------------------------------------------------------------------------------------------------------------------------------------------------------------------------------------------------------------------------------------------------------------------------------------------------------------------------------------------------------------------------------------------------------------------------------------------------------------------------------------------------------------------------------------------------------------------------------------------------------------------------------------------------------------------------------------------------------------------------------------------------------------------------------------------------------------------------------------------|------|------------------------------------|-----|-----------------------------------------------------------------------------------------------------------------------------------------------------------------------------------------------------------------------------------------------------------------------------------------------------------------------|------|----------------------------------------------------------------------------------------------------------------------------------------------------------------------------------------------------------------------------------------------------------------------------------------------------------------------------------------------------------------------------------------------------------------------------------------------------------------------------------------------------------------------------------------------------------------------------------------------------------|--------------|-----------------------------------------------------------------------|-----|----------------------------------------------------------------------------------------------------------------------------------------------------------------------------------------------------------------------------------------------------------------|-------|--------------------------|-------------------|---|-----------|------------------------------|---------------|----------------------------------------------------------------------------------------------------------------------------|--------------------------------------------------------------------------------------------------------------------------------------------------------------------------------------------------------------------------------------------------------------------------------------------------------------------------------------------------------------------------------------------------------------------------------------------------------------------------------------------------------------------------------------------------------------------------------------------------------------------------------------------------------------------------------------------------------------------------------------------------------------------------------------------------------------------------------------------------------------------------------------------------------------------------------------------------------------------------------------------------------------------------------------------------------------------------------------------------------|------------------------------------------------------------------------------------------------------------------------------------------------|
| <p>Dayson 2014<br/>(49,50,54,57,97)</p> | <p>Uncontrolled before-and-after study, mixed-methods</p> <p>Study length:<br/>31 months</p>                                                                                                                                                                                                                                                                                                                                                                                                                                                                                                             | <p><b>Inclusion criteria:</b><br/>- especially for patients with long term conditions (focus)</p> <p><b>Exclusion criteria:-</b></p> <p>Baseline characteristics:</p> <table border="1" data-bbox="477 352 783 884"> <tr> <td>N</td> <td></td> <td>1991</td> </tr> <tr> <td>Age</td> <td>60 years or over %</td> <td>87</td> </tr> <tr> <td>Gender</td> <td>Female %</td> <td>62</td> </tr> <tr> <td>Ethnicity</td> <td>White British n</td> <td>1488</td> </tr> <tr> <td>Living arrangement</td> <td></td> <td>-</td> </tr> <tr> <td>Employment status</td> <td></td> <td>-</td> </tr> <tr> <td>Other</td> <td></td> <td>-</td> </tr> </table> <p>Population: Special (long term conditions)</p> | N |  | 1991 | Age | 60 years or over % | 87 | Gender | Female % | 62 | Ethnicity | White British n | 1488 | Living arrangement |  | - | Employment status |  | - | Other |  | - | <p>Primary care: GP practice</p> <p>Country:<br/>UK (Rotherham, South Yorkshire, England)</p> | <table border="1" data-bbox="1305 226 2234 1035"> <tr> <td>Name</td> <td>Rotherham Social Prescribing Pilot</td> </tr> <tr> <td>Why</td> <td>Improving the health and well-being of people from marginalised and disadvantaged groups, reduce costly interventions in specialist care, increase the capacity of GPs to meet the non-clinical needs of patients with complex long term conditions (LTCs) who are the most intensive users of primary care resources</td> </tr> <tr> <td>What</td> <td>Part of a GP-led Integrated Case Management Pilot, a voluntary and community sector (VCS) liaison service for the whole borough which:<br/>· enables patients and their carers to access support from local VCS organisations contributes a VCS perspective to the assessment of needs and care planning for patients referred to multi-disciplinary Integrated Case Management Teams (ICMTs)<br/>· facilitates the development of new community-based services to fill gaps in provision, and funds additional capacity within existing VCS to meet the increase in demand created by Social Prescribing.</td> </tr> <tr> <td>Who provided</td> <td>Project manager, five Voluntary and Community Sector Advisors (VCSAs)</td> </tr> <tr> <td>How</td> <td>VCSAs provide the link between the pilot and multidisciplinary primary care teams, they receive referrals from GP practices of eligible patients and carers and make an assessment of their support needs before referring them on to appropriate VCS services</td> </tr> <tr> <td>Where</td> <td>First assessment at home</td> </tr> <tr> <td>When and How Much</td> <td>-</td> </tr> <tr> <td>Tailoring</td> <td>Personalized recommendations</td> </tr> <tr> <td>Modifications</td> <td>Duration was 10 weeks from 2009 until August 2013 when it changed to 8 weeks to enable more patients to access the program</td> </tr> </table> <p>Intervention: Holistic</p> | Name | Rotherham Social Prescribing Pilot | Why | Improving the health and well-being of people from marginalised and disadvantaged groups, reduce costly interventions in specialist care, increase the capacity of GPs to meet the non-clinical needs of patients with complex long term conditions (LTCs) who are the most intensive users of primary care resources | What | Part of a GP-led Integrated Case Management Pilot, a voluntary and community sector (VCS) liaison service for the whole borough which:<br>· enables patients and their carers to access support from local VCS organisations contributes a VCS perspective to the assessment of needs and care planning for patients referred to multi-disciplinary Integrated Case Management Teams (ICMTs)<br>· facilitates the development of new community-based services to fill gaps in provision, and funds additional capacity within existing VCS to meet the increase in demand created by Social Prescribing. | Who provided | Project manager, five Voluntary and Community Sector Advisors (VCSAs) | How | VCSAs provide the link between the pilot and multidisciplinary primary care teams, they receive referrals from GP practices of eligible patients and carers and make an assessment of their support needs before referring them on to appropriate VCS services | Where | First assessment at home | When and How Much | - | Tailoring | Personalized recommendations | Modifications | Duration was 10 weeks from 2009 until August 2013 when it changed to 8 weeks to enable more patients to access the program | <p>Patient outcomes at baseline (pre intervention) and 3-4-months follow-up (tool was completed by VCSAs with patients):</p> <p>Aspects of self-management at baseline (pre intervention) and 3-4-months follow-up (well-being measurement tool developed specifically for the service):</p> <ul style="list-style-type: none"> <li>- feeling positive</li> <li>- lifestyle</li> <li>- looking after yourself</li> <li>- managing symptoms</li> <li>- work, volunteering and social groups/other activities</li> <li>- money</li> <li>- where you live</li> <li>- family and friends</li> </ul> <p>Process of care measures at baseline (6/12 months before intervention) and 6/12-months follow-up provided by the NHS Data Management and Integration Centre (DMIC):</p> <ul style="list-style-type: none"> <li>- number of non-elective inpatient episodes (FCEs)</li> <li>- number of non-elective continuous inpatient spells</li> <li>- number of non-elective bed days</li> <li>- number of A&amp;E attendances</li> </ul> <p>- annual return on investment (ROI) from NHS cost reductions*</p> | <p>Peer-review: no</p> <p>Funding source:<br/>NHS Rotherham Clinical Commissioning Group</p> <p>Declaration of interest:<br/>Not mentioned</p> |
| N                                       |                                                                                                                                                                                                                                                                                                                                                                                                                                                                                                                                                                                                          | 1991                                                                                                                                                                                                                                                                                                                                                                                                                                                                                                                                                                                                                                                                                              |   |  |      |     |                    |    |        |          |    |           |                 |      |                    |  |   |                   |  |   |       |  |   |                                                                                               |                                                                                                                                                                                                                                                                                                                                                                                                                                                                                                                                                                                                                                                                                                                                                                                                                                                                                                                                                                                                                                                                                                                                                                                                                                                                                                                                                                                                                                                                                                                                                                                                                                                                                                                                                                                                                                                                                                                                          |      |                                    |     |                                                                                                                                                                                                                                                                                                                       |      |                                                                                                                                                                                                                                                                                                                                                                                                                                                                                                                                                                                                          |              |                                                                       |     |                                                                                                                                                                                                                                                                |       |                          |                   |   |           |                              |               |                                                                                                                            |                                                                                                                                                                                                                                                                                                                                                                                                                                                                                                                                                                                                                                                                                                                                                                                                                                                                                                                                                                                                                                                                                                        |                                                                                                                                                |
| Age                                     | 60 years or over %                                                                                                                                                                                                                                                                                                                                                                                                                                                                                                                                                                                       | 87                                                                                                                                                                                                                                                                                                                                                                                                                                                                                                                                                                                                                                                                                                |   |  |      |     |                    |    |        |          |    |           |                 |      |                    |  |   |                   |  |   |       |  |   |                                                                                               |                                                                                                                                                                                                                                                                                                                                                                                                                                                                                                                                                                                                                                                                                                                                                                                                                                                                                                                                                                                                                                                                                                                                                                                                                                                                                                                                                                                                                                                                                                                                                                                                                                                                                                                                                                                                                                                                                                                                          |      |                                    |     |                                                                                                                                                                                                                                                                                                                       |      |                                                                                                                                                                                                                                                                                                                                                                                                                                                                                                                                                                                                          |              |                                                                       |     |                                                                                                                                                                                                                                                                |       |                          |                   |   |           |                              |               |                                                                                                                            |                                                                                                                                                                                                                                                                                                                                                                                                                                                                                                                                                                                                                                                                                                                                                                                                                                                                                                                                                                                                                                                                                                        |                                                                                                                                                |
| Gender                                  | Female %                                                                                                                                                                                                                                                                                                                                                                                                                                                                                                                                                                                                 | 62                                                                                                                                                                                                                                                                                                                                                                                                                                                                                                                                                                                                                                                                                                |   |  |      |     |                    |    |        |          |    |           |                 |      |                    |  |   |                   |  |   |       |  |   |                                                                                               |                                                                                                                                                                                                                                                                                                                                                                                                                                                                                                                                                                                                                                                                                                                                                                                                                                                                                                                                                                                                                                                                                                                                                                                                                                                                                                                                                                                                                                                                                                                                                                                                                                                                                                                                                                                                                                                                                                                                          |      |                                    |     |                                                                                                                                                                                                                                                                                                                       |      |                                                                                                                                                                                                                                                                                                                                                                                                                                                                                                                                                                                                          |              |                                                                       |     |                                                                                                                                                                                                                                                                |       |                          |                   |   |           |                              |               |                                                                                                                            |                                                                                                                                                                                                                                                                                                                                                                                                                                                                                                                                                                                                                                                                                                                                                                                                                                                                                                                                                                                                                                                                                                        |                                                                                                                                                |
| Ethnicity                               | White British n                                                                                                                                                                                                                                                                                                                                                                                                                                                                                                                                                                                          | 1488                                                                                                                                                                                                                                                                                                                                                                                                                                                                                                                                                                                                                                                                                              |   |  |      |     |                    |    |        |          |    |           |                 |      |                    |  |   |                   |  |   |       |  |   |                                                                                               |                                                                                                                                                                                                                                                                                                                                                                                                                                                                                                                                                                                                                                                                                                                                                                                                                                                                                                                                                                                                                                                                                                                                                                                                                                                                                                                                                                                                                                                                                                                                                                                                                                                                                                                                                                                                                                                                                                                                          |      |                                    |     |                                                                                                                                                                                                                                                                                                                       |      |                                                                                                                                                                                                                                                                                                                                                                                                                                                                                                                                                                                                          |              |                                                                       |     |                                                                                                                                                                                                                                                                |       |                          |                   |   |           |                              |               |                                                                                                                            |                                                                                                                                                                                                                                                                                                                                                                                                                                                                                                                                                                                                                                                                                                                                                                                                                                                                                                                                                                                                                                                                                                        |                                                                                                                                                |
| Living arrangement                      |                                                                                                                                                                                                                                                                                                                                                                                                                                                                                                                                                                                                          | -                                                                                                                                                                                                                                                                                                                                                                                                                                                                                                                                                                                                                                                                                                 |   |  |      |     |                    |    |        |          |    |           |                 |      |                    |  |   |                   |  |   |       |  |   |                                                                                               |                                                                                                                                                                                                                                                                                                                                                                                                                                                                                                                                                                                                                                                                                                                                                                                                                                                                                                                                                                                                                                                                                                                                                                                                                                                                                                                                                                                                                                                                                                                                                                                                                                                                                                                                                                                                                                                                                                                                          |      |                                    |     |                                                                                                                                                                                                                                                                                                                       |      |                                                                                                                                                                                                                                                                                                                                                                                                                                                                                                                                                                                                          |              |                                                                       |     |                                                                                                                                                                                                                                                                |       |                          |                   |   |           |                              |               |                                                                                                                            |                                                                                                                                                                                                                                                                                                                                                                                                                                                                                                                                                                                                                                                                                                                                                                                                                                                                                                                                                                                                                                                                                                        |                                                                                                                                                |
| Employment status                       |                                                                                                                                                                                                                                                                                                                                                                                                                                                                                                                                                                                                          | -                                                                                                                                                                                                                                                                                                                                                                                                                                                                                                                                                                                                                                                                                                 |   |  |      |     |                    |    |        |          |    |           |                 |      |                    |  |   |                   |  |   |       |  |   |                                                                                               |                                                                                                                                                                                                                                                                                                                                                                                                                                                                                                                                                                                                                                                                                                                                                                                                                                                                                                                                                                                                                                                                                                                                                                                                                                                                                                                                                                                                                                                                                                                                                                                                                                                                                                                                                                                                                                                                                                                                          |      |                                    |     |                                                                                                                                                                                                                                                                                                                       |      |                                                                                                                                                                                                                                                                                                                                                                                                                                                                                                                                                                                                          |              |                                                                       |     |                                                                                                                                                                                                                                                                |       |                          |                   |   |           |                              |               |                                                                                                                            |                                                                                                                                                                                                                                                                                                                                                                                                                                                                                                                                                                                                                                                                                                                                                                                                                                                                                                                                                                                                                                                                                                        |                                                                                                                                                |
| Other                                   |                                                                                                                                                                                                                                                                                                                                                                                                                                                                                                                                                                                                          | -                                                                                                                                                                                                                                                                                                                                                                                                                                                                                                                                                                                                                                                                                                 |   |  |      |     |                    |    |        |          |    |           |                 |      |                    |  |   |                   |  |   |       |  |   |                                                                                               |                                                                                                                                                                                                                                                                                                                                                                                                                                                                                                                                                                                                                                                                                                                                                                                                                                                                                                                                                                                                                                                                                                                                                                                                                                                                                                                                                                                                                                                                                                                                                                                                                                                                                                                                                                                                                                                                                                                                          |      |                                    |     |                                                                                                                                                                                                                                                                                                                       |      |                                                                                                                                                                                                                                                                                                                                                                                                                                                                                                                                                                                                          |              |                                                                       |     |                                                                                                                                                                                                                                                                |       |                          |                   |   |           |                              |               |                                                                                                                            |                                                                                                                                                                                                                                                                                                                                                                                                                                                                                                                                                                                                                                                                                                                                                                                                                                                                                                                                                                                                                                                                                                        |                                                                                                                                                |
| Name                                    | Rotherham Social Prescribing Pilot                                                                                                                                                                                                                                                                                                                                                                                                                                                                                                                                                                       |                                                                                                                                                                                                                                                                                                                                                                                                                                                                                                                                                                                                                                                                                                   |   |  |      |     |                    |    |        |          |    |           |                 |      |                    |  |   |                   |  |   |       |  |   |                                                                                               |                                                                                                                                                                                                                                                                                                                                                                                                                                                                                                                                                                                                                                                                                                                                                                                                                                                                                                                                                                                                                                                                                                                                                                                                                                                                                                                                                                                                                                                                                                                                                                                                                                                                                                                                                                                                                                                                                                                                          |      |                                    |     |                                                                                                                                                                                                                                                                                                                       |      |                                                                                                                                                                                                                                                                                                                                                                                                                                                                                                                                                                                                          |              |                                                                       |     |                                                                                                                                                                                                                                                                |       |                          |                   |   |           |                              |               |                                                                                                                            |                                                                                                                                                                                                                                                                                                                                                                                                                                                                                                                                                                                                                                                                                                                                                                                                                                                                                                                                                                                                                                                                                                        |                                                                                                                                                |
| Why                                     | Improving the health and well-being of people from marginalised and disadvantaged groups, reduce costly interventions in specialist care, increase the capacity of GPs to meet the non-clinical needs of patients with complex long term conditions (LTCs) who are the most intensive users of primary care resources                                                                                                                                                                                                                                                                                    |                                                                                                                                                                                                                                                                                                                                                                                                                                                                                                                                                                                                                                                                                                   |   |  |      |     |                    |    |        |          |    |           |                 |      |                    |  |   |                   |  |   |       |  |   |                                                                                               |                                                                                                                                                                                                                                                                                                                                                                                                                                                                                                                                                                                                                                                                                                                                                                                                                                                                                                                                                                                                                                                                                                                                                                                                                                                                                                                                                                                                                                                                                                                                                                                                                                                                                                                                                                                                                                                                                                                                          |      |                                    |     |                                                                                                                                                                                                                                                                                                                       |      |                                                                                                                                                                                                                                                                                                                                                                                                                                                                                                                                                                                                          |              |                                                                       |     |                                                                                                                                                                                                                                                                |       |                          |                   |   |           |                              |               |                                                                                                                            |                                                                                                                                                                                                                                                                                                                                                                                                                                                                                                                                                                                                                                                                                                                                                                                                                                                                                                                                                                                                                                                                                                        |                                                                                                                                                |
| What                                    | Part of a GP-led Integrated Case Management Pilot, a voluntary and community sector (VCS) liaison service for the whole borough which:<br>· enables patients and their carers to access support from local VCS organisations contributes a VCS perspective to the assessment of needs and care planning for patients referred to multi-disciplinary Integrated Case Management Teams (ICMTs)<br>· facilitates the development of new community-based services to fill gaps in provision, and funds additional capacity within existing VCS to meet the increase in demand created by Social Prescribing. |                                                                                                                                                                                                                                                                                                                                                                                                                                                                                                                                                                                                                                                                                                   |   |  |      |     |                    |    |        |          |    |           |                 |      |                    |  |   |                   |  |   |       |  |   |                                                                                               |                                                                                                                                                                                                                                                                                                                                                                                                                                                                                                                                                                                                                                                                                                                                                                                                                                                                                                                                                                                                                                                                                                                                                                                                                                                                                                                                                                                                                                                                                                                                                                                                                                                                                                                                                                                                                                                                                                                                          |      |                                    |     |                                                                                                                                                                                                                                                                                                                       |      |                                                                                                                                                                                                                                                                                                                                                                                                                                                                                                                                                                                                          |              |                                                                       |     |                                                                                                                                                                                                                                                                |       |                          |                   |   |           |                              |               |                                                                                                                            |                                                                                                                                                                                                                                                                                                                                                                                                                                                                                                                                                                                                                                                                                                                                                                                                                                                                                                                                                                                                                                                                                                        |                                                                                                                                                |
| Who provided                            | Project manager, five Voluntary and Community Sector Advisors (VCSAs)                                                                                                                                                                                                                                                                                                                                                                                                                                                                                                                                    |                                                                                                                                                                                                                                                                                                                                                                                                                                                                                                                                                                                                                                                                                                   |   |  |      |     |                    |    |        |          |    |           |                 |      |                    |  |   |                   |  |   |       |  |   |                                                                                               |                                                                                                                                                                                                                                                                                                                                                                                                                                                                                                                                                                                                                                                                                                                                                                                                                                                                                                                                                                                                                                                                                                                                                                                                                                                                                                                                                                                                                                                                                                                                                                                                                                                                                                                                                                                                                                                                                                                                          |      |                                    |     |                                                                                                                                                                                                                                                                                                                       |      |                                                                                                                                                                                                                                                                                                                                                                                                                                                                                                                                                                                                          |              |                                                                       |     |                                                                                                                                                                                                                                                                |       |                          |                   |   |           |                              |               |                                                                                                                            |                                                                                                                                                                                                                                                                                                                                                                                                                                                                                                                                                                                                                                                                                                                                                                                                                                                                                                                                                                                                                                                                                                        |                                                                                                                                                |
| How                                     | VCSAs provide the link between the pilot and multidisciplinary primary care teams, they receive referrals from GP practices of eligible patients and carers and make an assessment of their support needs before referring them on to appropriate VCS services                                                                                                                                                                                                                                                                                                                                           |                                                                                                                                                                                                                                                                                                                                                                                                                                                                                                                                                                                                                                                                                                   |   |  |      |     |                    |    |        |          |    |           |                 |      |                    |  |   |                   |  |   |       |  |   |                                                                                               |                                                                                                                                                                                                                                                                                                                                                                                                                                                                                                                                                                                                                                                                                                                                                                                                                                                                                                                                                                                                                                                                                                                                                                                                                                                                                                                                                                                                                                                                                                                                                                                                                                                                                                                                                                                                                                                                                                                                          |      |                                    |     |                                                                                                                                                                                                                                                                                                                       |      |                                                                                                                                                                                                                                                                                                                                                                                                                                                                                                                                                                                                          |              |                                                                       |     |                                                                                                                                                                                                                                                                |       |                          |                   |   |           |                              |               |                                                                                                                            |                                                                                                                                                                                                                                                                                                                                                                                                                                                                                                                                                                                                                                                                                                                                                                                                                                                                                                                                                                                                                                                                                                        |                                                                                                                                                |
| Where                                   | First assessment at home                                                                                                                                                                                                                                                                                                                                                                                                                                                                                                                                                                                 |                                                                                                                                                                                                                                                                                                                                                                                                                                                                                                                                                                                                                                                                                                   |   |  |      |     |                    |    |        |          |    |           |                 |      |                    |  |   |                   |  |   |       |  |   |                                                                                               |                                                                                                                                                                                                                                                                                                                                                                                                                                                                                                                                                                                                                                                                                                                                                                                                                                                                                                                                                                                                                                                                                                                                                                                                                                                                                                                                                                                                                                                                                                                                                                                                                                                                                                                                                                                                                                                                                                                                          |      |                                    |     |                                                                                                                                                                                                                                                                                                                       |      |                                                                                                                                                                                                                                                                                                                                                                                                                                                                                                                                                                                                          |              |                                                                       |     |                                                                                                                                                                                                                                                                |       |                          |                   |   |           |                              |               |                                                                                                                            |                                                                                                                                                                                                                                                                                                                                                                                                                                                                                                                                                                                                                                                                                                                                                                                                                                                                                                                                                                                                                                                                                                        |                                                                                                                                                |
| When and How Much                       | -                                                                                                                                                                                                                                                                                                                                                                                                                                                                                                                                                                                                        |                                                                                                                                                                                                                                                                                                                                                                                                                                                                                                                                                                                                                                                                                                   |   |  |      |     |                    |    |        |          |    |           |                 |      |                    |  |   |                   |  |   |       |  |   |                                                                                               |                                                                                                                                                                                                                                                                                                                                                                                                                                                                                                                                                                                                                                                                                                                                                                                                                                                                                                                                                                                                                                                                                                                                                                                                                                                                                                                                                                                                                                                                                                                                                                                                                                                                                                                                                                                                                                                                                                                                          |      |                                    |     |                                                                                                                                                                                                                                                                                                                       |      |                                                                                                                                                                                                                                                                                                                                                                                                                                                                                                                                                                                                          |              |                                                                       |     |                                                                                                                                                                                                                                                                |       |                          |                   |   |           |                              |               |                                                                                                                            |                                                                                                                                                                                                                                                                                                                                                                                                                                                                                                                                                                                                                                                                                                                                                                                                                                                                                                                                                                                                                                                                                                        |                                                                                                                                                |
| Tailoring                               | Personalized recommendations                                                                                                                                                                                                                                                                                                                                                                                                                                                                                                                                                                             |                                                                                                                                                                                                                                                                                                                                                                                                                                                                                                                                                                                                                                                                                                   |   |  |      |     |                    |    |        |          |    |           |                 |      |                    |  |   |                   |  |   |       |  |   |                                                                                               |                                                                                                                                                                                                                                                                                                                                                                                                                                                                                                                                                                                                                                                                                                                                                                                                                                                                                                                                                                                                                                                                                                                                                                                                                                                                                                                                                                                                                                                                                                                                                                                                                                                                                                                                                                                                                                                                                                                                          |      |                                    |     |                                                                                                                                                                                                                                                                                                                       |      |                                                                                                                                                                                                                                                                                                                                                                                                                                                                                                                                                                                                          |              |                                                                       |     |                                                                                                                                                                                                                                                                |       |                          |                   |   |           |                              |               |                                                                                                                            |                                                                                                                                                                                                                                                                                                                                                                                                                                                                                                                                                                                                                                                                                                                                                                                                                                                                                                                                                                                                                                                                                                        |                                                                                                                                                |
| Modifications                           | Duration was 10 weeks from 2009 until August 2013 when it changed to 8 weeks to enable more patients to access the program                                                                                                                                                                                                                                                                                                                                                                                                                                                                               |                                                                                                                                                                                                                                                                                                                                                                                                                                                                                                                                                                                                                                                                                                   |   |  |      |     |                    |    |        |          |    |           |                 |      |                    |  |   |                   |  |   |       |  |   |                                                                                               |                                                                                                                                                                                                                                                                                                                                                                                                                                                                                                                                                                                                                                                                                                                                                                                                                                                                                                                                                                                                                                                                                                                                                                                                                                                                                                                                                                                                                                                                                                                                                                                                                                                                                                                                                                                                                                                                                                                                          |      |                                    |     |                                                                                                                                                                                                                                                                                                                       |      |                                                                                                                                                                                                                                                                                                                                                                                                                                                                                                                                                                                                          |              |                                                                       |     |                                                                                                                                                                                                                                                                |       |                          |                   |   |           |                              |               |                                                                                                                            |                                                                                                                                                                                                                                                                                                                                                                                                                                                                                                                                                                                                                                                                                                                                                                                                                                                                                                                                                                                                                                                                                                        |                                                                                                                                                |

|                    |                                                                                                                                                                                                                                       |                                                                                                                                                                                                                                                                                                                                                                                                                                                                                                                                                                                                                                                                                                                       |   |  |      |     |                    |    |        |          |      |           |   |   |                    |   |   |                   |   |   |       |                  |     |                                                                              |                                                                                                                                                                                                                                                                                                                                                                                                                                                                                                                                                                                                                                                                                                                                                                                                                                                                                                                                                                                                                                                                                                                                                                                                                                                                        |      |                                      |     |                                                                                                                                                                           |      |                                                                                                                                                                                                             |              |                                                                                     |     |              |       |            |                   |                                   |           |               |               |                                                                                                                                                                                                                                       |                                                                                                                                                                                                                                                                                                                                                                                                                                                                                                                                                                                                                                                                                                                                                          |                                                                                                                                                                           |
|--------------------|---------------------------------------------------------------------------------------------------------------------------------------------------------------------------------------------------------------------------------------|-----------------------------------------------------------------------------------------------------------------------------------------------------------------------------------------------------------------------------------------------------------------------------------------------------------------------------------------------------------------------------------------------------------------------------------------------------------------------------------------------------------------------------------------------------------------------------------------------------------------------------------------------------------------------------------------------------------------------|---|--|------|-----|--------------------|----|--------|----------|------|-----------|---|---|--------------------|---|---|-------------------|---|---|-------|------------------|-----|------------------------------------------------------------------------------|------------------------------------------------------------------------------------------------------------------------------------------------------------------------------------------------------------------------------------------------------------------------------------------------------------------------------------------------------------------------------------------------------------------------------------------------------------------------------------------------------------------------------------------------------------------------------------------------------------------------------------------------------------------------------------------------------------------------------------------------------------------------------------------------------------------------------------------------------------------------------------------------------------------------------------------------------------------------------------------------------------------------------------------------------------------------------------------------------------------------------------------------------------------------------------------------------------------------------------------------------------------------|------|--------------------------------------|-----|---------------------------------------------------------------------------------------------------------------------------------------------------------------------------|------|-------------------------------------------------------------------------------------------------------------------------------------------------------------------------------------------------------------|--------------|-------------------------------------------------------------------------------------|-----|--------------|-------|------------|-------------------|-----------------------------------|-----------|---------------|---------------|---------------------------------------------------------------------------------------------------------------------------------------------------------------------------------------------------------------------------------------|----------------------------------------------------------------------------------------------------------------------------------------------------------------------------------------------------------------------------------------------------------------------------------------------------------------------------------------------------------------------------------------------------------------------------------------------------------------------------------------------------------------------------------------------------------------------------------------------------------------------------------------------------------------------------------------------------------------------------------------------------------|---------------------------------------------------------------------------------------------------------------------------------------------------------------------------|
| Dayson 2016 (51)   | Uncontrolled before-and-after study, mixed-methods<br><br>Study length: 12 months                                                                                                                                                     | <p><b>Inclusion criteria:-</b></p> <p><b>Exclusion criteria:</b></p> <p>- acute episodes of psychosis, or primary issues with drug and alcohol</p> <p>Baseline characteristics:</p> <table border="1" data-bbox="477 380 1074 751"> <tr> <td>N</td> <td></td> <td>1058</td> </tr> <tr> <td>Age</td> <td>60 years or over %</td> <td>55</td> </tr> <tr> <td>Gender</td> <td>Female %</td> <td>59.9</td> </tr> <tr> <td>Ethnicity</td> <td>-</td> <td>-</td> </tr> <tr> <td>Living arrangement</td> <td>-</td> <td>-</td> </tr> <tr> <td>Employment status</td> <td>-</td> <td>-</td> </tr> <tr> <td>Other</td> <td>Disability yes n</td> <td>649</td> </tr> </table> <p>Population: Special (long term conditions)</p> | N |  | 1058 | Age | 60 years or over % | 55 | Gender | Female % | 59.9 | Ethnicity | - | - | Living arrangement | - | - | Employment status | - | - | Other | Disability yes n | 649 | Primary care<br><br>Country:<br><br>UK (Doncaster, South Yorkshire, England) | <table border="1" data-bbox="1308 226 2237 814"> <tr> <td>Name</td> <td>Doncaster Social Prescribing Service</td> </tr> <tr> <td>Why</td> <td>It aims to prevent worsening health for people with long term health conditions and reduce the number and intensity of costly interventions in urgent or specialist care.</td> </tr> <tr> <td>What</td> <td>Service's Advisors receive client referrals from GPs, community nurses and pharmacists and provide them with support to access a range of voluntary, community and statutory services that meet their needs</td> </tr> <tr> <td>Who provided</td> <td>Service's Advisors, a number of volunteers that support the delivery of the Service</td> </tr> <tr> <td>How</td> <td>Face-to-face</td> </tr> <tr> <td>Where</td> <td>Home visit</td> </tr> <tr> <td>When and How Much</td> <td>10-15 minutes for each home visit</td> </tr> <tr> <td>Tailoring</td> <td>Tailored plan</td> </tr> <tr> <td>Modifications</td> <td>The nature of referrals had changed since the pilot phase: cases had become more complex, often with multiple issues which need a number of individual referrals. There were more clients with severe or complex mental health issues</td> </tr> </table> <p>Intervention: Medium</p> | Name | Doncaster Social Prescribing Service | Why | It aims to prevent worsening health for people with long term health conditions and reduce the number and intensity of costly interventions in urgent or specialist care. | What | Service's Advisors receive client referrals from GPs, community nurses and pharmacists and provide them with support to access a range of voluntary, community and statutory services that meet their needs | Who provided | Service's Advisors, a number of volunteers that support the delivery of the Service | How | Face-to-face | Where | Home visit | When and How Much | 10-15 minutes for each home visit | Tailoring | Tailored plan | Modifications | The nature of referrals had changed since the pilot phase: cases had become more complex, often with multiple issues which need a number of individual referrals. There were more clients with severe or complex mental health issues | <p>Patient outcomes at baseline (pre intervention) and 3-6-months follow-up (monitoring data and self-evaluation questionnaires):</p> <ul style="list-style-type: none"> <li>- Doncaster Outcome Tool (DOT) (includes: health: EQ-5D-3L*, social connectedness/contact: 'social isolation and loneliness' scale, financial management: scale from Office for National Statistics-ONS)</li> </ul> <p>Process of care measures (collected by SYHA and Doncaster CVS):</p> <ul style="list-style-type: none"> <li>- GP appointments*</li> <li>- Nurse appointments*</li> <li>- mental health* services*</li> <li>- psychotherapy appointments*</li> <li>- A&amp;E attendance*</li> <li>- Inpatient stays*</li> <li>- contact with social worker*</li> </ul> | <p>Peer-Review: no</p> <p>Funding source:</p> <p>Community Fund<br/>Prospectus Innovation Fund, Better Care Fund</p> <p>Declaration of interest:</p> <p>Not mentioned</p> |
| N                  |                                                                                                                                                                                                                                       | 1058                                                                                                                                                                                                                                                                                                                                                                                                                                                                                                                                                                                                                                                                                                                  |   |  |      |     |                    |    |        |          |      |           |   |   |                    |   |   |                   |   |   |       |                  |     |                                                                              |                                                                                                                                                                                                                                                                                                                                                                                                                                                                                                                                                                                                                                                                                                                                                                                                                                                                                                                                                                                                                                                                                                                                                                                                                                                                        |      |                                      |     |                                                                                                                                                                           |      |                                                                                                                                                                                                             |              |                                                                                     |     |              |       |            |                   |                                   |           |               |               |                                                                                                                                                                                                                                       |                                                                                                                                                                                                                                                                                                                                                                                                                                                                                                                                                                                                                                                                                                                                                          |                                                                                                                                                                           |
| Age                | 60 years or over %                                                                                                                                                                                                                    | 55                                                                                                                                                                                                                                                                                                                                                                                                                                                                                                                                                                                                                                                                                                                    |   |  |      |     |                    |    |        |          |      |           |   |   |                    |   |   |                   |   |   |       |                  |     |                                                                              |                                                                                                                                                                                                                                                                                                                                                                                                                                                                                                                                                                                                                                                                                                                                                                                                                                                                                                                                                                                                                                                                                                                                                                                                                                                                        |      |                                      |     |                                                                                                                                                                           |      |                                                                                                                                                                                                             |              |                                                                                     |     |              |       |            |                   |                                   |           |               |               |                                                                                                                                                                                                                                       |                                                                                                                                                                                                                                                                                                                                                                                                                                                                                                                                                                                                                                                                                                                                                          |                                                                                                                                                                           |
| Gender             | Female %                                                                                                                                                                                                                              | 59.9                                                                                                                                                                                                                                                                                                                                                                                                                                                                                                                                                                                                                                                                                                                  |   |  |      |     |                    |    |        |          |      |           |   |   |                    |   |   |                   |   |   |       |                  |     |                                                                              |                                                                                                                                                                                                                                                                                                                                                                                                                                                                                                                                                                                                                                                                                                                                                                                                                                                                                                                                                                                                                                                                                                                                                                                                                                                                        |      |                                      |     |                                                                                                                                                                           |      |                                                                                                                                                                                                             |              |                                                                                     |     |              |       |            |                   |                                   |           |               |               |                                                                                                                                                                                                                                       |                                                                                                                                                                                                                                                                                                                                                                                                                                                                                                                                                                                                                                                                                                                                                          |                                                                                                                                                                           |
| Ethnicity          | -                                                                                                                                                                                                                                     | -                                                                                                                                                                                                                                                                                                                                                                                                                                                                                                                                                                                                                                                                                                                     |   |  |      |     |                    |    |        |          |      |           |   |   |                    |   |   |                   |   |   |       |                  |     |                                                                              |                                                                                                                                                                                                                                                                                                                                                                                                                                                                                                                                                                                                                                                                                                                                                                                                                                                                                                                                                                                                                                                                                                                                                                                                                                                                        |      |                                      |     |                                                                                                                                                                           |      |                                                                                                                                                                                                             |              |                                                                                     |     |              |       |            |                   |                                   |           |               |               |                                                                                                                                                                                                                                       |                                                                                                                                                                                                                                                                                                                                                                                                                                                                                                                                                                                                                                                                                                                                                          |                                                                                                                                                                           |
| Living arrangement | -                                                                                                                                                                                                                                     | -                                                                                                                                                                                                                                                                                                                                                                                                                                                                                                                                                                                                                                                                                                                     |   |  |      |     |                    |    |        |          |      |           |   |   |                    |   |   |                   |   |   |       |                  |     |                                                                              |                                                                                                                                                                                                                                                                                                                                                                                                                                                                                                                                                                                                                                                                                                                                                                                                                                                                                                                                                                                                                                                                                                                                                                                                                                                                        |      |                                      |     |                                                                                                                                                                           |      |                                                                                                                                                                                                             |              |                                                                                     |     |              |       |            |                   |                                   |           |               |               |                                                                                                                                                                                                                                       |                                                                                                                                                                                                                                                                                                                                                                                                                                                                                                                                                                                                                                                                                                                                                          |                                                                                                                                                                           |
| Employment status  | -                                                                                                                                                                                                                                     | -                                                                                                                                                                                                                                                                                                                                                                                                                                                                                                                                                                                                                                                                                                                     |   |  |      |     |                    |    |        |          |      |           |   |   |                    |   |   |                   |   |   |       |                  |     |                                                                              |                                                                                                                                                                                                                                                                                                                                                                                                                                                                                                                                                                                                                                                                                                                                                                                                                                                                                                                                                                                                                                                                                                                                                                                                                                                                        |      |                                      |     |                                                                                                                                                                           |      |                                                                                                                                                                                                             |              |                                                                                     |     |              |       |            |                   |                                   |           |               |               |                                                                                                                                                                                                                                       |                                                                                                                                                                                                                                                                                                                                                                                                                                                                                                                                                                                                                                                                                                                                                          |                                                                                                                                                                           |
| Other              | Disability yes n                                                                                                                                                                                                                      | 649                                                                                                                                                                                                                                                                                                                                                                                                                                                                                                                                                                                                                                                                                                                   |   |  |      |     |                    |    |        |          |      |           |   |   |                    |   |   |                   |   |   |       |                  |     |                                                                              |                                                                                                                                                                                                                                                                                                                                                                                                                                                                                                                                                                                                                                                                                                                                                                                                                                                                                                                                                                                                                                                                                                                                                                                                                                                                        |      |                                      |     |                                                                                                                                                                           |      |                                                                                                                                                                                                             |              |                                                                                     |     |              |       |            |                   |                                   |           |               |               |                                                                                                                                                                                                                                       |                                                                                                                                                                                                                                                                                                                                                                                                                                                                                                                                                                                                                                                                                                                                                          |                                                                                                                                                                           |
| Name               | Doncaster Social Prescribing Service                                                                                                                                                                                                  |                                                                                                                                                                                                                                                                                                                                                                                                                                                                                                                                                                                                                                                                                                                       |   |  |      |     |                    |    |        |          |      |           |   |   |                    |   |   |                   |   |   |       |                  |     |                                                                              |                                                                                                                                                                                                                                                                                                                                                                                                                                                                                                                                                                                                                                                                                                                                                                                                                                                                                                                                                                                                                                                                                                                                                                                                                                                                        |      |                                      |     |                                                                                                                                                                           |      |                                                                                                                                                                                                             |              |                                                                                     |     |              |       |            |                   |                                   |           |               |               |                                                                                                                                                                                                                                       |                                                                                                                                                                                                                                                                                                                                                                                                                                                                                                                                                                                                                                                                                                                                                          |                                                                                                                                                                           |
| Why                | It aims to prevent worsening health for people with long term health conditions and reduce the number and intensity of costly interventions in urgent or specialist care.                                                             |                                                                                                                                                                                                                                                                                                                                                                                                                                                                                                                                                                                                                                                                                                                       |   |  |      |     |                    |    |        |          |      |           |   |   |                    |   |   |                   |   |   |       |                  |     |                                                                              |                                                                                                                                                                                                                                                                                                                                                                                                                                                                                                                                                                                                                                                                                                                                                                                                                                                                                                                                                                                                                                                                                                                                                                                                                                                                        |      |                                      |     |                                                                                                                                                                           |      |                                                                                                                                                                                                             |              |                                                                                     |     |              |       |            |                   |                                   |           |               |               |                                                                                                                                                                                                                                       |                                                                                                                                                                                                                                                                                                                                                                                                                                                                                                                                                                                                                                                                                                                                                          |                                                                                                                                                                           |
| What               | Service's Advisors receive client referrals from GPs, community nurses and pharmacists and provide them with support to access a range of voluntary, community and statutory services that meet their needs                           |                                                                                                                                                                                                                                                                                                                                                                                                                                                                                                                                                                                                                                                                                                                       |   |  |      |     |                    |    |        |          |      |           |   |   |                    |   |   |                   |   |   |       |                  |     |                                                                              |                                                                                                                                                                                                                                                                                                                                                                                                                                                                                                                                                                                                                                                                                                                                                                                                                                                                                                                                                                                                                                                                                                                                                                                                                                                                        |      |                                      |     |                                                                                                                                                                           |      |                                                                                                                                                                                                             |              |                                                                                     |     |              |       |            |                   |                                   |           |               |               |                                                                                                                                                                                                                                       |                                                                                                                                                                                                                                                                                                                                                                                                                                                                                                                                                                                                                                                                                                                                                          |                                                                                                                                                                           |
| Who provided       | Service's Advisors, a number of volunteers that support the delivery of the Service                                                                                                                                                   |                                                                                                                                                                                                                                                                                                                                                                                                                                                                                                                                                                                                                                                                                                                       |   |  |      |     |                    |    |        |          |      |           |   |   |                    |   |   |                   |   |   |       |                  |     |                                                                              |                                                                                                                                                                                                                                                                                                                                                                                                                                                                                                                                                                                                                                                                                                                                                                                                                                                                                                                                                                                                                                                                                                                                                                                                                                                                        |      |                                      |     |                                                                                                                                                                           |      |                                                                                                                                                                                                             |              |                                                                                     |     |              |       |            |                   |                                   |           |               |               |                                                                                                                                                                                                                                       |                                                                                                                                                                                                                                                                                                                                                                                                                                                                                                                                                                                                                                                                                                                                                          |                                                                                                                                                                           |
| How                | Face-to-face                                                                                                                                                                                                                          |                                                                                                                                                                                                                                                                                                                                                                                                                                                                                                                                                                                                                                                                                                                       |   |  |      |     |                    |    |        |          |      |           |   |   |                    |   |   |                   |   |   |       |                  |     |                                                                              |                                                                                                                                                                                                                                                                                                                                                                                                                                                                                                                                                                                                                                                                                                                                                                                                                                                                                                                                                                                                                                                                                                                                                                                                                                                                        |      |                                      |     |                                                                                                                                                                           |      |                                                                                                                                                                                                             |              |                                                                                     |     |              |       |            |                   |                                   |           |               |               |                                                                                                                                                                                                                                       |                                                                                                                                                                                                                                                                                                                                                                                                                                                                                                                                                                                                                                                                                                                                                          |                                                                                                                                                                           |
| Where              | Home visit                                                                                                                                                                                                                            |                                                                                                                                                                                                                                                                                                                                                                                                                                                                                                                                                                                                                                                                                                                       |   |  |      |     |                    |    |        |          |      |           |   |   |                    |   |   |                   |   |   |       |                  |     |                                                                              |                                                                                                                                                                                                                                                                                                                                                                                                                                                                                                                                                                                                                                                                                                                                                                                                                                                                                                                                                                                                                                                                                                                                                                                                                                                                        |      |                                      |     |                                                                                                                                                                           |      |                                                                                                                                                                                                             |              |                                                                                     |     |              |       |            |                   |                                   |           |               |               |                                                                                                                                                                                                                                       |                                                                                                                                                                                                                                                                                                                                                                                                                                                                                                                                                                                                                                                                                                                                                          |                                                                                                                                                                           |
| When and How Much  | 10-15 minutes for each home visit                                                                                                                                                                                                     |                                                                                                                                                                                                                                                                                                                                                                                                                                                                                                                                                                                                                                                                                                                       |   |  |      |     |                    |    |        |          |      |           |   |   |                    |   |   |                   |   |   |       |                  |     |                                                                              |                                                                                                                                                                                                                                                                                                                                                                                                                                                                                                                                                                                                                                                                                                                                                                                                                                                                                                                                                                                                                                                                                                                                                                                                                                                                        |      |                                      |     |                                                                                                                                                                           |      |                                                                                                                                                                                                             |              |                                                                                     |     |              |       |            |                   |                                   |           |               |               |                                                                                                                                                                                                                                       |                                                                                                                                                                                                                                                                                                                                                                                                                                                                                                                                                                                                                                                                                                                                                          |                                                                                                                                                                           |
| Tailoring          | Tailored plan                                                                                                                                                                                                                         |                                                                                                                                                                                                                                                                                                                                                                                                                                                                                                                                                                                                                                                                                                                       |   |  |      |     |                    |    |        |          |      |           |   |   |                    |   |   |                   |   |   |       |                  |     |                                                                              |                                                                                                                                                                                                                                                                                                                                                                                                                                                                                                                                                                                                                                                                                                                                                                                                                                                                                                                                                                                                                                                                                                                                                                                                                                                                        |      |                                      |     |                                                                                                                                                                           |      |                                                                                                                                                                                                             |              |                                                                                     |     |              |       |            |                   |                                   |           |               |               |                                                                                                                                                                                                                                       |                                                                                                                                                                                                                                                                                                                                                                                                                                                                                                                                                                                                                                                                                                                                                          |                                                                                                                                                                           |
| Modifications      | The nature of referrals had changed since the pilot phase: cases had become more complex, often with multiple issues which need a number of individual referrals. There were more clients with severe or complex mental health issues |                                                                                                                                                                                                                                                                                                                                                                                                                                                                                                                                                                                                                                                                                                                       |   |  |      |     |                    |    |        |          |      |           |   |   |                    |   |   |                   |   |   |       |                  |     |                                                                              |                                                                                                                                                                                                                                                                                                                                                                                                                                                                                                                                                                                                                                                                                                                                                                                                                                                                                                                                                                                                                                                                                                                                                                                                                                                                        |      |                                      |     |                                                                                                                                                                           |      |                                                                                                                                                                                                             |              |                                                                                     |     |              |       |            |                   |                                   |           |               |               |                                                                                                                                                                                                                                       |                                                                                                                                                                                                                                                                                                                                                                                                                                                                                                                                                                                                                                                                                                                                                          |                                                                                                                                                                           |

|                                   |                                                                                                                                                                                                                                                                                                                                                                                                                                                                                                                                                                                                                                                                                                                                                                                                                                                                                                                                                                                                                                                                                                                                                                                                                                                                                                               |                                                                                                                                                                                                                                                                                                                                                                                                                                                                                                                                                                                                                                                                                                                                                                                                                                                                                                                                                                                                                                                                                                                                                                                                                                                                                                                                                                                                                                                                                                                                                                                                   |   |     |     |              |        |        |           |    |                    |                 |                   |                    |       |   |                                                                                  |                                                                                                                                                                                                                                                                                                                                                                                                                                                                                                                                                                                                                                                                                                                                                                                                                                                                                                                                                                                                                                                                                                                                                                                                                                                                                                                                                                                                                                                                                                                                                                                                                                                                                                                                                                                                                                                                                                                                                                                                                                                                                                                                                                                                                               |      |                                                    |                                           |                                                                                                                                                                                                                                                                                                                                                                                                 |                                                                                |                                                                                                                                                                                                                                                                                                                                                                                                                                                                                                                                                                                                                                                                                                                                                                                                                                                                                                                                                                                                                                                                                                                                                                                                                                                                                                               |              |                                                 |     |                                                                                                                                                          |       |                                                                                                                                                                                                                                                                                                                                                                                                                                             |                   |                     |           |              |                                                                                                                                                                                                                                                                                                                                                                                                                                                                                                                                                                                                                                                                                                                                                                                                                      |                                                                                                                                                |                   |   |                                                                                                                                                                                                                                                                                                                                                                                                                                                                    |                                                                                                                   |
|-----------------------------------|---------------------------------------------------------------------------------------------------------------------------------------------------------------------------------------------------------------------------------------------------------------------------------------------------------------------------------------------------------------------------------------------------------------------------------------------------------------------------------------------------------------------------------------------------------------------------------------------------------------------------------------------------------------------------------------------------------------------------------------------------------------------------------------------------------------------------------------------------------------------------------------------------------------------------------------------------------------------------------------------------------------------------------------------------------------------------------------------------------------------------------------------------------------------------------------------------------------------------------------------------------------------------------------------------------------|---------------------------------------------------------------------------------------------------------------------------------------------------------------------------------------------------------------------------------------------------------------------------------------------------------------------------------------------------------------------------------------------------------------------------------------------------------------------------------------------------------------------------------------------------------------------------------------------------------------------------------------------------------------------------------------------------------------------------------------------------------------------------------------------------------------------------------------------------------------------------------------------------------------------------------------------------------------------------------------------------------------------------------------------------------------------------------------------------------------------------------------------------------------------------------------------------------------------------------------------------------------------------------------------------------------------------------------------------------------------------------------------------------------------------------------------------------------------------------------------------------------------------------------------------------------------------------------------------|---|-----|-----|--------------|--------|--------|-----------|----|--------------------|-----------------|-------------------|--------------------|-------|---|----------------------------------------------------------------------------------|-------------------------------------------------------------------------------------------------------------------------------------------------------------------------------------------------------------------------------------------------------------------------------------------------------------------------------------------------------------------------------------------------------------------------------------------------------------------------------------------------------------------------------------------------------------------------------------------------------------------------------------------------------------------------------------------------------------------------------------------------------------------------------------------------------------------------------------------------------------------------------------------------------------------------------------------------------------------------------------------------------------------------------------------------------------------------------------------------------------------------------------------------------------------------------------------------------------------------------------------------------------------------------------------------------------------------------------------------------------------------------------------------------------------------------------------------------------------------------------------------------------------------------------------------------------------------------------------------------------------------------------------------------------------------------------------------------------------------------------------------------------------------------------------------------------------------------------------------------------------------------------------------------------------------------------------------------------------------------------------------------------------------------------------------------------------------------------------------------------------------------------------------------------------------------------------------------------------------------|------|----------------------------------------------------|-------------------------------------------|-------------------------------------------------------------------------------------------------------------------------------------------------------------------------------------------------------------------------------------------------------------------------------------------------------------------------------------------------------------------------------------------------|--------------------------------------------------------------------------------|---------------------------------------------------------------------------------------------------------------------------------------------------------------------------------------------------------------------------------------------------------------------------------------------------------------------------------------------------------------------------------------------------------------------------------------------------------------------------------------------------------------------------------------------------------------------------------------------------------------------------------------------------------------------------------------------------------------------------------------------------------------------------------------------------------------------------------------------------------------------------------------------------------------------------------------------------------------------------------------------------------------------------------------------------------------------------------------------------------------------------------------------------------------------------------------------------------------------------------------------------------------------------------------------------------------|--------------|-------------------------------------------------|-----|----------------------------------------------------------------------------------------------------------------------------------------------------------|-------|---------------------------------------------------------------------------------------------------------------------------------------------------------------------------------------------------------------------------------------------------------------------------------------------------------------------------------------------------------------------------------------------------------------------------------------------|-------------------|---------------------|-----------|--------------|----------------------------------------------------------------------------------------------------------------------------------------------------------------------------------------------------------------------------------------------------------------------------------------------------------------------------------------------------------------------------------------------------------------------------------------------------------------------------------------------------------------------------------------------------------------------------------------------------------------------------------------------------------------------------------------------------------------------------------------------------------------------------------------------------------------------|------------------------------------------------------------------------------------------------------------------------------------------------|-------------------|---|--------------------------------------------------------------------------------------------------------------------------------------------------------------------------------------------------------------------------------------------------------------------------------------------------------------------------------------------------------------------------------------------------------------------------------------------------------------------|-------------------------------------------------------------------------------------------------------------------|
| <p>Dayson 2017<br/>(52,53,58)</p> | <p>Uncontrolled before-and-after study, mixed-methods</p> <p>Study length:<br/>24 months</p>                                                                                                                                                                                                                                                                                                                                                                                                                                                                                                                                                                                                                                                                                                                                                                                                                                                                                                                                                                                                                                                                                                                                                                                                                  | <p><b>Inclusion criteria:</b></p> <p>The service focusses on three service user care pathway clusters:</p> <ul style="list-style-type: none"> <li>Cluster 4: severe depression and/or anxiety and/or other non-psychotic disorders that increase the complexity of their needs</li> <li>Cluster 7: issues associated with long term anxiety and depression or other non-psychotic disorders. They will have received treatment for a number of years and although their symptoms are improved and stable, as a result of long term ill-health they are likely to have a level of social disability that affects their day to day functioning, and leads them to be over dependent on others.</li> <li>Cluster 11: a history of psychotic symptoms that are currently controlled and causing minor problems if any at all. They are likely to be experiencing a sustained period of recovery, but require support to regain confidence with day to day life skills, such as sustaining meaningful relationships, and re-entering the work place. They may also have some long term dependence issues.</li> </ul> <p><b>Exclusion criteria:-</b></p> <p>Baseline characteristics:</p> <table border="1" data-bbox="477 726 1071 1066"> <tr> <td>N</td> <td>317</td> </tr> <tr> <td>Age</td> <td>-</td> </tr> <tr> <td>Gender</td> <td>-</td> </tr> <tr> <td>Ethnicity</td> <td>-</td> </tr> <tr> <td>Living arrangement</td> <td>-</td> </tr> <tr> <td>Employment status</td> <td>-</td> </tr> <tr> <td>Other</td> <td>-</td> </tr> </table> <p>Population: Special<br/>(psychiatric diagnosis)</p> | N | 317 | Age | -            | Gender | -      | Ethnicity | -  | Living arrangement | -               | Employment status | -                  | Other | - | <p>Primary care</p> <p>Country:<br/>UK (Rotherham, South Yorkshire, England)</p> | <table border="1" data-bbox="1308 226 2228 1304"> <tr> <td>Name</td> <td>Rotherham Social Prescribing Mental Health Service</td> </tr> <tr> <td>Why</td> <td>To help people with mental health conditions overcome the barriers which prevent discharge from secondary mental health care services, to create opportunities for mental health service users to sustain their health and well-being outside secondary mental health services, to create capacity within secondary mental health services, to improve efficiency within mental health services</td> </tr> <tr> <td>What</td> <td> <p>Phase 1 (typically weeks 1 – 10): Referrals are made for individual service users by an RDaSH practitioner.</p> <p>Phase 2 (typically weeks 11 – 18): A discharge review meeting is normally held between the RDaSH practitioner, the VCS Advisor and the service user to assess progress with social prescribing.</p> <p>Phase 3 (typically weeks 19 – 26): During this phase, the service user's primary contact is the VCS Advisor or one of the voluntary sector organisations providing support through the programme.</p> <p>Range of activities:</p> <ul style="list-style-type: none"> <li>Befriending plus, providing peer support for people lacking confidence to engage in community activities independently (five providers), including two services to support engagement in physical activity and one for vulnerable women</li> <li>Education and training opportunities, enabling people to build practical skills and confidence in areas of interest including working towards employment. Community activity groups, providing opportunities for people to engage social activities base around a particular hobby or interest (five providers)</li> <li>Therapeutic services, enabling people to develop relaxation and mindfulness techniques in a supportive environment</li> </ul> </td> </tr> <tr> <td>Who provided</td> <td>VCS Advisor</td> </tr> <tr> <td>How</td> <td>One-to-one</td> </tr> <tr> <td>Where</td> <td>-</td> </tr> <tr> <td>When and How Much</td> <td>Six months pathway</td> </tr> <tr> <td>Tailoring</td> <td>Personalized</td> </tr> </table> <p>Intervention: Holistic</p> | Name | Rotherham Social Prescribing Mental Health Service | Why                                       | To help people with mental health conditions overcome the barriers which prevent discharge from secondary mental health care services, to create opportunities for mental health service users to sustain their health and well-being outside secondary mental health services, to create capacity within secondary mental health services, to improve efficiency within mental health services | What                                                                           | <p>Phase 1 (typically weeks 1 – 10): Referrals are made for individual service users by an RDaSH practitioner.</p> <p>Phase 2 (typically weeks 11 – 18): A discharge review meeting is normally held between the RDaSH practitioner, the VCS Advisor and the service user to assess progress with social prescribing.</p> <p>Phase 3 (typically weeks 19 – 26): During this phase, the service user's primary contact is the VCS Advisor or one of the voluntary sector organisations providing support through the programme.</p> <p>Range of activities:</p> <ul style="list-style-type: none"> <li>Befriending plus, providing peer support for people lacking confidence to engage in community activities independently (five providers), including two services to support engagement in physical activity and one for vulnerable women</li> <li>Education and training opportunities, enabling people to build practical skills and confidence in areas of interest including working towards employment. Community activity groups, providing opportunities for people to engage social activities base around a particular hobby or interest (five providers)</li> <li>Therapeutic services, enabling people to develop relaxation and mindfulness techniques in a supportive environment</li> </ul> | Who provided | VCS Advisor                                     | How | One-to-one                                                                                                                                               | Where | -                                                                                                                                                                                                                                                                                                                                                                                                                                           | When and How Much | Six months pathway  | Tailoring | Personalized | <p>Patient outcomes at baseline (pre intervention) and 4-6 months follow-up (baseline collected by VCSAs and follow-up via telephone):</p> <p>Well-being measures (for each five point scale):</p> <ul style="list-style-type: none"> <li>where you live</li> <li>money</li> <li>work, volunteering and social groups</li> <li>managing symptoms</li> <li>looking after yourself</li> <li>lifestyle</li> <li>feeling positive</li> <li>family and friends</li> <li>Wider outcomes social benefits:</li> <li>employment*</li> <li>training and education*</li> <li>volunteering*</li> <li>physical activity*</li> <li>peer support*</li> <li>voluntary and community sector activities*</li> </ul> <p>Economic evaluation:</p> <ul style="list-style-type: none"> <li>-Social return on Investment (SROI)*</li> </ul> | <p>Peer-Review: no</p> <p>Funding source:<br/>NHS Rotherham Clinical Commissioning Group</p> <p>Declaration of interest:<br/>not mentioned</p> |                   |   |                                                                                                                                                                                                                                                                                                                                                                                                                                                                    |                                                                                                                   |
| N                                 | 317                                                                                                                                                                                                                                                                                                                                                                                                                                                                                                                                                                                                                                                                                                                                                                                                                                                                                                                                                                                                                                                                                                                                                                                                                                                                                                           |                                                                                                                                                                                                                                                                                                                                                                                                                                                                                                                                                                                                                                                                                                                                                                                                                                                                                                                                                                                                                                                                                                                                                                                                                                                                                                                                                                                                                                                                                                                                                                                                   |   |     |     |              |        |        |           |    |                    |                 |                   |                    |       |   |                                                                                  |                                                                                                                                                                                                                                                                                                                                                                                                                                                                                                                                                                                                                                                                                                                                                                                                                                                                                                                                                                                                                                                                                                                                                                                                                                                                                                                                                                                                                                                                                                                                                                                                                                                                                                                                                                                                                                                                                                                                                                                                                                                                                                                                                                                                                               |      |                                                    |                                           |                                                                                                                                                                                                                                                                                                                                                                                                 |                                                                                |                                                                                                                                                                                                                                                                                                                                                                                                                                                                                                                                                                                                                                                                                                                                                                                                                                                                                                                                                                                                                                                                                                                                                                                                                                                                                                               |              |                                                 |     |                                                                                                                                                          |       |                                                                                                                                                                                                                                                                                                                                                                                                                                             |                   |                     |           |              |                                                                                                                                                                                                                                                                                                                                                                                                                                                                                                                                                                                                                                                                                                                                                                                                                      |                                                                                                                                                |                   |   |                                                                                                                                                                                                                                                                                                                                                                                                                                                                    |                                                                                                                   |
| Age                               | -                                                                                                                                                                                                                                                                                                                                                                                                                                                                                                                                                                                                                                                                                                                                                                                                                                                                                                                                                                                                                                                                                                                                                                                                                                                                                                             |                                                                                                                                                                                                                                                                                                                                                                                                                                                                                                                                                                                                                                                                                                                                                                                                                                                                                                                                                                                                                                                                                                                                                                                                                                                                                                                                                                                                                                                                                                                                                                                                   |   |     |     |              |        |        |           |    |                    |                 |                   |                    |       |   |                                                                                  |                                                                                                                                                                                                                                                                                                                                                                                                                                                                                                                                                                                                                                                                                                                                                                                                                                                                                                                                                                                                                                                                                                                                                                                                                                                                                                                                                                                                                                                                                                                                                                                                                                                                                                                                                                                                                                                                                                                                                                                                                                                                                                                                                                                                                               |      |                                                    |                                           |                                                                                                                                                                                                                                                                                                                                                                                                 |                                                                                |                                                                                                                                                                                                                                                                                                                                                                                                                                                                                                                                                                                                                                                                                                                                                                                                                                                                                                                                                                                                                                                                                                                                                                                                                                                                                                               |              |                                                 |     |                                                                                                                                                          |       |                                                                                                                                                                                                                                                                                                                                                                                                                                             |                   |                     |           |              |                                                                                                                                                                                                                                                                                                                                                                                                                                                                                                                                                                                                                                                                                                                                                                                                                      |                                                                                                                                                |                   |   |                                                                                                                                                                                                                                                                                                                                                                                                                                                                    |                                                                                                                   |
| Gender                            | -                                                                                                                                                                                                                                                                                                                                                                                                                                                                                                                                                                                                                                                                                                                                                                                                                                                                                                                                                                                                                                                                                                                                                                                                                                                                                                             |                                                                                                                                                                                                                                                                                                                                                                                                                                                                                                                                                                                                                                                                                                                                                                                                                                                                                                                                                                                                                                                                                                                                                                                                                                                                                                                                                                                                                                                                                                                                                                                                   |   |     |     |              |        |        |           |    |                    |                 |                   |                    |       |   |                                                                                  |                                                                                                                                                                                                                                                                                                                                                                                                                                                                                                                                                                                                                                                                                                                                                                                                                                                                                                                                                                                                                                                                                                                                                                                                                                                                                                                                                                                                                                                                                                                                                                                                                                                                                                                                                                                                                                                                                                                                                                                                                                                                                                                                                                                                                               |      |                                                    |                                           |                                                                                                                                                                                                                                                                                                                                                                                                 |                                                                                |                                                                                                                                                                                                                                                                                                                                                                                                                                                                                                                                                                                                                                                                                                                                                                                                                                                                                                                                                                                                                                                                                                                                                                                                                                                                                                               |              |                                                 |     |                                                                                                                                                          |       |                                                                                                                                                                                                                                                                                                                                                                                                                                             |                   |                     |           |              |                                                                                                                                                                                                                                                                                                                                                                                                                                                                                                                                                                                                                                                                                                                                                                                                                      |                                                                                                                                                |                   |   |                                                                                                                                                                                                                                                                                                                                                                                                                                                                    |                                                                                                                   |
| Ethnicity                         | -                                                                                                                                                                                                                                                                                                                                                                                                                                                                                                                                                                                                                                                                                                                                                                                                                                                                                                                                                                                                                                                                                                                                                                                                                                                                                                             |                                                                                                                                                                                                                                                                                                                                                                                                                                                                                                                                                                                                                                                                                                                                                                                                                                                                                                                                                                                                                                                                                                                                                                                                                                                                                                                                                                                                                                                                                                                                                                                                   |   |     |     |              |        |        |           |    |                    |                 |                   |                    |       |   |                                                                                  |                                                                                                                                                                                                                                                                                                                                                                                                                                                                                                                                                                                                                                                                                                                                                                                                                                                                                                                                                                                                                                                                                                                                                                                                                                                                                                                                                                                                                                                                                                                                                                                                                                                                                                                                                                                                                                                                                                                                                                                                                                                                                                                                                                                                                               |      |                                                    |                                           |                                                                                                                                                                                                                                                                                                                                                                                                 |                                                                                |                                                                                                                                                                                                                                                                                                                                                                                                                                                                                                                                                                                                                                                                                                                                                                                                                                                                                                                                                                                                                                                                                                                                                                                                                                                                                                               |              |                                                 |     |                                                                                                                                                          |       |                                                                                                                                                                                                                                                                                                                                                                                                                                             |                   |                     |           |              |                                                                                                                                                                                                                                                                                                                                                                                                                                                                                                                                                                                                                                                                                                                                                                                                                      |                                                                                                                                                |                   |   |                                                                                                                                                                                                                                                                                                                                                                                                                                                                    |                                                                                                                   |
| Living arrangement                | -                                                                                                                                                                                                                                                                                                                                                                                                                                                                                                                                                                                                                                                                                                                                                                                                                                                                                                                                                                                                                                                                                                                                                                                                                                                                                                             |                                                                                                                                                                                                                                                                                                                                                                                                                                                                                                                                                                                                                                                                                                                                                                                                                                                                                                                                                                                                                                                                                                                                                                                                                                                                                                                                                                                                                                                                                                                                                                                                   |   |     |     |              |        |        |           |    |                    |                 |                   |                    |       |   |                                                                                  |                                                                                                                                                                                                                                                                                                                                                                                                                                                                                                                                                                                                                                                                                                                                                                                                                                                                                                                                                                                                                                                                                                                                                                                                                                                                                                                                                                                                                                                                                                                                                                                                                                                                                                                                                                                                                                                                                                                                                                                                                                                                                                                                                                                                                               |      |                                                    |                                           |                                                                                                                                                                                                                                                                                                                                                                                                 |                                                                                |                                                                                                                                                                                                                                                                                                                                                                                                                                                                                                                                                                                                                                                                                                                                                                                                                                                                                                                                                                                                                                                                                                                                                                                                                                                                                                               |              |                                                 |     |                                                                                                                                                          |       |                                                                                                                                                                                                                                                                                                                                                                                                                                             |                   |                     |           |              |                                                                                                                                                                                                                                                                                                                                                                                                                                                                                                                                                                                                                                                                                                                                                                                                                      |                                                                                                                                                |                   |   |                                                                                                                                                                                                                                                                                                                                                                                                                                                                    |                                                                                                                   |
| Employment status                 | -                                                                                                                                                                                                                                                                                                                                                                                                                                                                                                                                                                                                                                                                                                                                                                                                                                                                                                                                                                                                                                                                                                                                                                                                                                                                                                             |                                                                                                                                                                                                                                                                                                                                                                                                                                                                                                                                                                                                                                                                                                                                                                                                                                                                                                                                                                                                                                                                                                                                                                                                                                                                                                                                                                                                                                                                                                                                                                                                   |   |     |     |              |        |        |           |    |                    |                 |                   |                    |       |   |                                                                                  |                                                                                                                                                                                                                                                                                                                                                                                                                                                                                                                                                                                                                                                                                                                                                                                                                                                                                                                                                                                                                                                                                                                                                                                                                                                                                                                                                                                                                                                                                                                                                                                                                                                                                                                                                                                                                                                                                                                                                                                                                                                                                                                                                                                                                               |      |                                                    |                                           |                                                                                                                                                                                                                                                                                                                                                                                                 |                                                                                |                                                                                                                                                                                                                                                                                                                                                                                                                                                                                                                                                                                                                                                                                                                                                                                                                                                                                                                                                                                                                                                                                                                                                                                                                                                                                                               |              |                                                 |     |                                                                                                                                                          |       |                                                                                                                                                                                                                                                                                                                                                                                                                                             |                   |                     |           |              |                                                                                                                                                                                                                                                                                                                                                                                                                                                                                                                                                                                                                                                                                                                                                                                                                      |                                                                                                                                                |                   |   |                                                                                                                                                                                                                                                                                                                                                                                                                                                                    |                                                                                                                   |
| Other                             | -                                                                                                                                                                                                                                                                                                                                                                                                                                                                                                                                                                                                                                                                                                                                                                                                                                                                                                                                                                                                                                                                                                                                                                                                                                                                                                             |                                                                                                                                                                                                                                                                                                                                                                                                                                                                                                                                                                                                                                                                                                                                                                                                                                                                                                                                                                                                                                                                                                                                                                                                                                                                                                                                                                                                                                                                                                                                                                                                   |   |     |     |              |        |        |           |    |                    |                 |                   |                    |       |   |                                                                                  |                                                                                                                                                                                                                                                                                                                                                                                                                                                                                                                                                                                                                                                                                                                                                                                                                                                                                                                                                                                                                                                                                                                                                                                                                                                                                                                                                                                                                                                                                                                                                                                                                                                                                                                                                                                                                                                                                                                                                                                                                                                                                                                                                                                                                               |      |                                                    |                                           |                                                                                                                                                                                                                                                                                                                                                                                                 |                                                                                |                                                                                                                                                                                                                                                                                                                                                                                                                                                                                                                                                                                                                                                                                                                                                                                                                                                                                                                                                                                                                                                                                                                                                                                                                                                                                                               |              |                                                 |     |                                                                                                                                                          |       |                                                                                                                                                                                                                                                                                                                                                                                                                                             |                   |                     |           |              |                                                                                                                                                                                                                                                                                                                                                                                                                                                                                                                                                                                                                                                                                                                                                                                                                      |                                                                                                                                                |                   |   |                                                                                                                                                                                                                                                                                                                                                                                                                                                                    |                                                                                                                   |
| Name                              | Rotherham Social Prescribing Mental Health Service                                                                                                                                                                                                                                                                                                                                                                                                                                                                                                                                                                                                                                                                                                                                                                                                                                                                                                                                                                                                                                                                                                                                                                                                                                                            |                                                                                                                                                                                                                                                                                                                                                                                                                                                                                                                                                                                                                                                                                                                                                                                                                                                                                                                                                                                                                                                                                                                                                                                                                                                                                                                                                                                                                                                                                                                                                                                                   |   |     |     |              |        |        |           |    |                    |                 |                   |                    |       |   |                                                                                  |                                                                                                                                                                                                                                                                                                                                                                                                                                                                                                                                                                                                                                                                                                                                                                                                                                                                                                                                                                                                                                                                                                                                                                                                                                                                                                                                                                                                                                                                                                                                                                                                                                                                                                                                                                                                                                                                                                                                                                                                                                                                                                                                                                                                                               |      |                                                    |                                           |                                                                                                                                                                                                                                                                                                                                                                                                 |                                                                                |                                                                                                                                                                                                                                                                                                                                                                                                                                                                                                                                                                                                                                                                                                                                                                                                                                                                                                                                                                                                                                                                                                                                                                                                                                                                                                               |              |                                                 |     |                                                                                                                                                          |       |                                                                                                                                                                                                                                                                                                                                                                                                                                             |                   |                     |           |              |                                                                                                                                                                                                                                                                                                                                                                                                                                                                                                                                                                                                                                                                                                                                                                                                                      |                                                                                                                                                |                   |   |                                                                                                                                                                                                                                                                                                                                                                                                                                                                    |                                                                                                                   |
| Why                               | To help people with mental health conditions overcome the barriers which prevent discharge from secondary mental health care services, to create opportunities for mental health service users to sustain their health and well-being outside secondary mental health services, to create capacity within secondary mental health services, to improve efficiency within mental health services                                                                                                                                                                                                                                                                                                                                                                                                                                                                                                                                                                                                                                                                                                                                                                                                                                                                                                               |                                                                                                                                                                                                                                                                                                                                                                                                                                                                                                                                                                                                                                                                                                                                                                                                                                                                                                                                                                                                                                                                                                                                                                                                                                                                                                                                                                                                                                                                                                                                                                                                   |   |     |     |              |        |        |           |    |                    |                 |                   |                    |       |   |                                                                                  |                                                                                                                                                                                                                                                                                                                                                                                                                                                                                                                                                                                                                                                                                                                                                                                                                                                                                                                                                                                                                                                                                                                                                                                                                                                                                                                                                                                                                                                                                                                                                                                                                                                                                                                                                                                                                                                                                                                                                                                                                                                                                                                                                                                                                               |      |                                                    |                                           |                                                                                                                                                                                                                                                                                                                                                                                                 |                                                                                |                                                                                                                                                                                                                                                                                                                                                                                                                                                                                                                                                                                                                                                                                                                                                                                                                                                                                                                                                                                                                                                                                                                                                                                                                                                                                                               |              |                                                 |     |                                                                                                                                                          |       |                                                                                                                                                                                                                                                                                                                                                                                                                                             |                   |                     |           |              |                                                                                                                                                                                                                                                                                                                                                                                                                                                                                                                                                                                                                                                                                                                                                                                                                      |                                                                                                                                                |                   |   |                                                                                                                                                                                                                                                                                                                                                                                                                                                                    |                                                                                                                   |
| What                              | <p>Phase 1 (typically weeks 1 – 10): Referrals are made for individual service users by an RDaSH practitioner.</p> <p>Phase 2 (typically weeks 11 – 18): A discharge review meeting is normally held between the RDaSH practitioner, the VCS Advisor and the service user to assess progress with social prescribing.</p> <p>Phase 3 (typically weeks 19 – 26): During this phase, the service user's primary contact is the VCS Advisor or one of the voluntary sector organisations providing support through the programme.</p> <p>Range of activities:</p> <ul style="list-style-type: none"> <li>Befriending plus, providing peer support for people lacking confidence to engage in community activities independently (five providers), including two services to support engagement in physical activity and one for vulnerable women</li> <li>Education and training opportunities, enabling people to build practical skills and confidence in areas of interest including working towards employment. Community activity groups, providing opportunities for people to engage social activities base around a particular hobby or interest (five providers)</li> <li>Therapeutic services, enabling people to develop relaxation and mindfulness techniques in a supportive environment</li> </ul> |                                                                                                                                                                                                                                                                                                                                                                                                                                                                                                                                                                                                                                                                                                                                                                                                                                                                                                                                                                                                                                                                                                                                                                                                                                                                                                                                                                                                                                                                                                                                                                                                   |   |     |     |              |        |        |           |    |                    |                 |                   |                    |       |   |                                                                                  |                                                                                                                                                                                                                                                                                                                                                                                                                                                                                                                                                                                                                                                                                                                                                                                                                                                                                                                                                                                                                                                                                                                                                                                                                                                                                                                                                                                                                                                                                                                                                                                                                                                                                                                                                                                                                                                                                                                                                                                                                                                                                                                                                                                                                               |      |                                                    |                                           |                                                                                                                                                                                                                                                                                                                                                                                                 |                                                                                |                                                                                                                                                                                                                                                                                                                                                                                                                                                                                                                                                                                                                                                                                                                                                                                                                                                                                                                                                                                                                                                                                                                                                                                                                                                                                                               |              |                                                 |     |                                                                                                                                                          |       |                                                                                                                                                                                                                                                                                                                                                                                                                                             |                   |                     |           |              |                                                                                                                                                                                                                                                                                                                                                                                                                                                                                                                                                                                                                                                                                                                                                                                                                      |                                                                                                                                                |                   |   |                                                                                                                                                                                                                                                                                                                                                                                                                                                                    |                                                                                                                   |
| Who provided                      | VCS Advisor                                                                                                                                                                                                                                                                                                                                                                                                                                                                                                                                                                                                                                                                                                                                                                                                                                                                                                                                                                                                                                                                                                                                                                                                                                                                                                   |                                                                                                                                                                                                                                                                                                                                                                                                                                                                                                                                                                                                                                                                                                                                                                                                                                                                                                                                                                                                                                                                                                                                                                                                                                                                                                                                                                                                                                                                                                                                                                                                   |   |     |     |              |        |        |           |    |                    |                 |                   |                    |       |   |                                                                                  |                                                                                                                                                                                                                                                                                                                                                                                                                                                                                                                                                                                                                                                                                                                                                                                                                                                                                                                                                                                                                                                                                                                                                                                                                                                                                                                                                                                                                                                                                                                                                                                                                                                                                                                                                                                                                                                                                                                                                                                                                                                                                                                                                                                                                               |      |                                                    |                                           |                                                                                                                                                                                                                                                                                                                                                                                                 |                                                                                |                                                                                                                                                                                                                                                                                                                                                                                                                                                                                                                                                                                                                                                                                                                                                                                                                                                                                                                                                                                                                                                                                                                                                                                                                                                                                                               |              |                                                 |     |                                                                                                                                                          |       |                                                                                                                                                                                                                                                                                                                                                                                                                                             |                   |                     |           |              |                                                                                                                                                                                                                                                                                                                                                                                                                                                                                                                                                                                                                                                                                                                                                                                                                      |                                                                                                                                                |                   |   |                                                                                                                                                                                                                                                                                                                                                                                                                                                                    |                                                                                                                   |
| How                               | One-to-one                                                                                                                                                                                                                                                                                                                                                                                                                                                                                                                                                                                                                                                                                                                                                                                                                                                                                                                                                                                                                                                                                                                                                                                                                                                                                                    |                                                                                                                                                                                                                                                                                                                                                                                                                                                                                                                                                                                                                                                                                                                                                                                                                                                                                                                                                                                                                                                                                                                                                                                                                                                                                                                                                                                                                                                                                                                                                                                                   |   |     |     |              |        |        |           |    |                    |                 |                   |                    |       |   |                                                                                  |                                                                                                                                                                                                                                                                                                                                                                                                                                                                                                                                                                                                                                                                                                                                                                                                                                                                                                                                                                                                                                                                                                                                                                                                                                                                                                                                                                                                                                                                                                                                                                                                                                                                                                                                                                                                                                                                                                                                                                                                                                                                                                                                                                                                                               |      |                                                    |                                           |                                                                                                                                                                                                                                                                                                                                                                                                 |                                                                                |                                                                                                                                                                                                                                                                                                                                                                                                                                                                                                                                                                                                                                                                                                                                                                                                                                                                                                                                                                                                                                                                                                                                                                                                                                                                                                               |              |                                                 |     |                                                                                                                                                          |       |                                                                                                                                                                                                                                                                                                                                                                                                                                             |                   |                     |           |              |                                                                                                                                                                                                                                                                                                                                                                                                                                                                                                                                                                                                                                                                                                                                                                                                                      |                                                                                                                                                |                   |   |                                                                                                                                                                                                                                                                                                                                                                                                                                                                    |                                                                                                                   |
| Where                             | -                                                                                                                                                                                                                                                                                                                                                                                                                                                                                                                                                                                                                                                                                                                                                                                                                                                                                                                                                                                                                                                                                                                                                                                                                                                                                                             |                                                                                                                                                                                                                                                                                                                                                                                                                                                                                                                                                                                                                                                                                                                                                                                                                                                                                                                                                                                                                                                                                                                                                                                                                                                                                                                                                                                                                                                                                                                                                                                                   |   |     |     |              |        |        |           |    |                    |                 |                   |                    |       |   |                                                                                  |                                                                                                                                                                                                                                                                                                                                                                                                                                                                                                                                                                                                                                                                                                                                                                                                                                                                                                                                                                                                                                                                                                                                                                                                                                                                                                                                                                                                                                                                                                                                                                                                                                                                                                                                                                                                                                                                                                                                                                                                                                                                                                                                                                                                                               |      |                                                    |                                           |                                                                                                                                                                                                                                                                                                                                                                                                 |                                                                                |                                                                                                                                                                                                                                                                                                                                                                                                                                                                                                                                                                                                                                                                                                                                                                                                                                                                                                                                                                                                                                                                                                                                                                                                                                                                                                               |              |                                                 |     |                                                                                                                                                          |       |                                                                                                                                                                                                                                                                                                                                                                                                                                             |                   |                     |           |              |                                                                                                                                                                                                                                                                                                                                                                                                                                                                                                                                                                                                                                                                                                                                                                                                                      |                                                                                                                                                |                   |   |                                                                                                                                                                                                                                                                                                                                                                                                                                                                    |                                                                                                                   |
| When and How Much                 | Six months pathway                                                                                                                                                                                                                                                                                                                                                                                                                                                                                                                                                                                                                                                                                                                                                                                                                                                                                                                                                                                                                                                                                                                                                                                                                                                                                            |                                                                                                                                                                                                                                                                                                                                                                                                                                                                                                                                                                                                                                                                                                                                                                                                                                                                                                                                                                                                                                                                                                                                                                                                                                                                                                                                                                                                                                                                                                                                                                                                   |   |     |     |              |        |        |           |    |                    |                 |                   |                    |       |   |                                                                                  |                                                                                                                                                                                                                                                                                                                                                                                                                                                                                                                                                                                                                                                                                                                                                                                                                                                                                                                                                                                                                                                                                                                                                                                                                                                                                                                                                                                                                                                                                                                                                                                                                                                                                                                                                                                                                                                                                                                                                                                                                                                                                                                                                                                                                               |      |                                                    |                                           |                                                                                                                                                                                                                                                                                                                                                                                                 |                                                                                |                                                                                                                                                                                                                                                                                                                                                                                                                                                                                                                                                                                                                                                                                                                                                                                                                                                                                                                                                                                                                                                                                                                                                                                                                                                                                                               |              |                                                 |     |                                                                                                                                                          |       |                                                                                                                                                                                                                                                                                                                                                                                                                                             |                   |                     |           |              |                                                                                                                                                                                                                                                                                                                                                                                                                                                                                                                                                                                                                                                                                                                                                                                                                      |                                                                                                                                                |                   |   |                                                                                                                                                                                                                                                                                                                                                                                                                                                                    |                                                                                                                   |
| Tailoring                         | Personalized                                                                                                                                                                                                                                                                                                                                                                                                                                                                                                                                                                                                                                                                                                                                                                                                                                                                                                                                                                                                                                                                                                                                                                                                                                                                                                  |                                                                                                                                                                                                                                                                                                                                                                                                                                                                                                                                                                                                                                                                                                                                                                                                                                                                                                                                                                                                                                                                                                                                                                                                                                                                                                                                                                                                                                                                                                                                                                                                   |   |     |     |              |        |        |           |    |                    |                 |                   |                    |       |   |                                                                                  |                                                                                                                                                                                                                                                                                                                                                                                                                                                                                                                                                                                                                                                                                                                                                                                                                                                                                                                                                                                                                                                                                                                                                                                                                                                                                                                                                                                                                                                                                                                                                                                                                                                                                                                                                                                                                                                                                                                                                                                                                                                                                                                                                                                                                               |      |                                                    |                                           |                                                                                                                                                                                                                                                                                                                                                                                                 |                                                                                |                                                                                                                                                                                                                                                                                                                                                                                                                                                                                                                                                                                                                                                                                                                                                                                                                                                                                                                                                                                                                                                                                                                                                                                                                                                                                                               |              |                                                 |     |                                                                                                                                                          |       |                                                                                                                                                                                                                                                                                                                                                                                                                                             |                   |                     |           |              |                                                                                                                                                                                                                                                                                                                                                                                                                                                                                                                                                                                                                                                                                                                                                                                                                      |                                                                                                                                                |                   |   |                                                                                                                                                                                                                                                                                                                                                                                                                                                                    |                                                                                                                   |
| <p>Dayson 2018<br/>(56)</p>       | <p>Uncontrolled before-and-after study, mixed-methods</p> <p>Study length:<br/>9 months</p>                                                                                                                                                                                                                                                                                                                                                                                                                                                                                                                                                                                                                                                                                                                                                                                                                                                                                                                                                                                                                                                                                                                                                                                                                   | <p><b>Inclusion criteria:</b></p> <p>- patients who could benefit from additional socially focused support, including people who are isolated, feeling low or lacking in confidence</p> <p><b>Exclusion criteria: -</b></p> <p>Baseline characteristics:</p> <table border="1" data-bbox="477 1581 988 1906"> <tr> <td>N</td> <td>703</td> </tr> <tr> <td>Age</td> <td>&lt; 65 years %</td> <td>78</td> </tr> <tr> <td>Gender</td> <td>Female %</td> <td>69</td> </tr> <tr> <td>Ethnicity</td> <td>White British %</td> <td>47</td> </tr> <tr> <td>Living arrangement</td> <td>-</td> <td>-</td> </tr> <tr> <td>Employment status</td> <td>-</td> <td>-</td> </tr> <tr> <td>Other</td> <td>Service users with at least one long-term</td> <td>77</td> </tr> </table>                                                                                                                                                                                                                                                                                                                                                                                                                                                                                                                                                                                                                                                                                                                                                                                                                              | N | 703 | Age | < 65 years % | 78     | Gender | Female %  | 69 | Ethnicity          | White British % | 47                | Living arrangement | -     | - | Employment status                                                                | -                                                                                                                                                                                                                                                                                                                                                                                                                                                                                                                                                                                                                                                                                                                                                                                                                                                                                                                                                                                                                                                                                                                                                                                                                                                                                                                                                                                                                                                                                                                                                                                                                                                                                                                                                                                                                                                                                                                                                                                                                                                                                                                                                                                                                             | -    | Other                                              | Service users with at least one long-term | 77                                                                                                                                                                                                                                                                                                                                                                                              | <p>Primary care</p> <p>Country:<br/>UK (Bradford, West Yorkshire, England)</p> | <table border="1" data-bbox="1308 1402 2228 1906"> <tr> <td>Name</td> <td>Community Connectors Social Prescribing Service</td> </tr> <tr> <td>Why</td> <td>Improve the health, well-being and social connectedness of local people, reduce unplanned and unnecessary demand on primary and secondary health service</td> </tr> <tr> <td>What</td> <td> <p>Referral from a GP of patients, followed by a home visit from a Community Connector during which they find out what people are interested in, identify what services and activities are available locally that fit those interests, and then help people access them</p> <p>-if a patient is lacking in confidence the Connector will go along with them to a service or activity until they are confident enough to go on their own</p> </td> </tr> <tr> <td>Who provided</td> <td>Community Connector</td> </tr> <tr> <td>How</td> <td>Face-to-face</td> </tr> <tr> <td>Where</td> <td>Home visit or meeting in a mutually agreed setting</td> </tr> <tr> <td>When and How Much</td> <td>-</td> </tr> </table>                                                                                                                                                                                                                                    | Name         | Community Connectors Social Prescribing Service | Why | Improve the health, well-being and social connectedness of local people, reduce unplanned and unnecessary demand on primary and secondary health service | What  | <p>Referral from a GP of patients, followed by a home visit from a Community Connector during which they find out what people are interested in, identify what services and activities are available locally that fit those interests, and then help people access them</p> <p>-if a patient is lacking in confidence the Connector will go along with them to a service or activity until they are confident enough to go on their own</p> | Who provided      | Community Connector | How       | Face-to-face | Where                                                                                                                                                                                                                                                                                                                                                                                                                                                                                                                                                                                                                                                                                                                                                                                                                | Home visit or meeting in a mutually agreed setting                                                                                             | When and How Much | - | <p>Patient outcomes at baseline (pre intervention) and 3-months follow-up (questionnaire completed with Community Connector services):</p> <ul style="list-style-type: none"> <li>EQ-VAS scale</li> <li>EQ-5D*</li> <li>Short Warwick Edinburgh Mental Well-being Scale (SWEMWBS)</li> <li>Trust (Likert scale 0-10)</li> <li>Connectedness and relationship*</li> <li>self-care*</li> </ul> <p>Process of care measures 3 months before and 3/6 months after:</p> | <p>Peer-Review: no</p> <p>Funding source:<br/>Not mentioned</p> <p>Declaration of interest:<br/>Not mentioned</p> |
| N                                 | 703                                                                                                                                                                                                                                                                                                                                                                                                                                                                                                                                                                                                                                                                                                                                                                                                                                                                                                                                                                                                                                                                                                                                                                                                                                                                                                           |                                                                                                                                                                                                                                                                                                                                                                                                                                                                                                                                                                                                                                                                                                                                                                                                                                                                                                                                                                                                                                                                                                                                                                                                                                                                                                                                                                                                                                                                                                                                                                                                   |   |     |     |              |        |        |           |    |                    |                 |                   |                    |       |   |                                                                                  |                                                                                                                                                                                                                                                                                                                                                                                                                                                                                                                                                                                                                                                                                                                                                                                                                                                                                                                                                                                                                                                                                                                                                                                                                                                                                                                                                                                                                                                                                                                                                                                                                                                                                                                                                                                                                                                                                                                                                                                                                                                                                                                                                                                                                               |      |                                                    |                                           |                                                                                                                                                                                                                                                                                                                                                                                                 |                                                                                |                                                                                                                                                                                                                                                                                                                                                                                                                                                                                                                                                                                                                                                                                                                                                                                                                                                                                                                                                                                                                                                                                                                                                                                                                                                                                                               |              |                                                 |     |                                                                                                                                                          |       |                                                                                                                                                                                                                                                                                                                                                                                                                                             |                   |                     |           |              |                                                                                                                                                                                                                                                                                                                                                                                                                                                                                                                                                                                                                                                                                                                                                                                                                      |                                                                                                                                                |                   |   |                                                                                                                                                                                                                                                                                                                                                                                                                                                                    |                                                                                                                   |
| Age                               | < 65 years %                                                                                                                                                                                                                                                                                                                                                                                                                                                                                                                                                                                                                                                                                                                                                                                                                                                                                                                                                                                                                                                                                                                                                                                                                                                                                                  | 78                                                                                                                                                                                                                                                                                                                                                                                                                                                                                                                                                                                                                                                                                                                                                                                                                                                                                                                                                                                                                                                                                                                                                                                                                                                                                                                                                                                                                                                                                                                                                                                                |   |     |     |              |        |        |           |    |                    |                 |                   |                    |       |   |                                                                                  |                                                                                                                                                                                                                                                                                                                                                                                                                                                                                                                                                                                                                                                                                                                                                                                                                                                                                                                                                                                                                                                                                                                                                                                                                                                                                                                                                                                                                                                                                                                                                                                                                                                                                                                                                                                                                                                                                                                                                                                                                                                                                                                                                                                                                               |      |                                                    |                                           |                                                                                                                                                                                                                                                                                                                                                                                                 |                                                                                |                                                                                                                                                                                                                                                                                                                                                                                                                                                                                                                                                                                                                                                                                                                                                                                                                                                                                                                                                                                                                                                                                                                                                                                                                                                                                                               |              |                                                 |     |                                                                                                                                                          |       |                                                                                                                                                                                                                                                                                                                                                                                                                                             |                   |                     |           |              |                                                                                                                                                                                                                                                                                                                                                                                                                                                                                                                                                                                                                                                                                                                                                                                                                      |                                                                                                                                                |                   |   |                                                                                                                                                                                                                                                                                                                                                                                                                                                                    |                                                                                                                   |
| Gender                            | Female %                                                                                                                                                                                                                                                                                                                                                                                                                                                                                                                                                                                                                                                                                                                                                                                                                                                                                                                                                                                                                                                                                                                                                                                                                                                                                                      | 69                                                                                                                                                                                                                                                                                                                                                                                                                                                                                                                                                                                                                                                                                                                                                                                                                                                                                                                                                                                                                                                                                                                                                                                                                                                                                                                                                                                                                                                                                                                                                                                                |   |     |     |              |        |        |           |    |                    |                 |                   |                    |       |   |                                                                                  |                                                                                                                                                                                                                                                                                                                                                                                                                                                                                                                                                                                                                                                                                                                                                                                                                                                                                                                                                                                                                                                                                                                                                                                                                                                                                                                                                                                                                                                                                                                                                                                                                                                                                                                                                                                                                                                                                                                                                                                                                                                                                                                                                                                                                               |      |                                                    |                                           |                                                                                                                                                                                                                                                                                                                                                                                                 |                                                                                |                                                                                                                                                                                                                                                                                                                                                                                                                                                                                                                                                                                                                                                                                                                                                                                                                                                                                                                                                                                                                                                                                                                                                                                                                                                                                                               |              |                                                 |     |                                                                                                                                                          |       |                                                                                                                                                                                                                                                                                                                                                                                                                                             |                   |                     |           |              |                                                                                                                                                                                                                                                                                                                                                                                                                                                                                                                                                                                                                                                                                                                                                                                                                      |                                                                                                                                                |                   |   |                                                                                                                                                                                                                                                                                                                                                                                                                                                                    |                                                                                                                   |
| Ethnicity                         | White British %                                                                                                                                                                                                                                                                                                                                                                                                                                                                                                                                                                                                                                                                                                                                                                                                                                                                                                                                                                                                                                                                                                                                                                                                                                                                                               | 47                                                                                                                                                                                                                                                                                                                                                                                                                                                                                                                                                                                                                                                                                                                                                                                                                                                                                                                                                                                                                                                                                                                                                                                                                                                                                                                                                                                                                                                                                                                                                                                                |   |     |     |              |        |        |           |    |                    |                 |                   |                    |       |   |                                                                                  |                                                                                                                                                                                                                                                                                                                                                                                                                                                                                                                                                                                                                                                                                                                                                                                                                                                                                                                                                                                                                                                                                                                                                                                                                                                                                                                                                                                                                                                                                                                                                                                                                                                                                                                                                                                                                                                                                                                                                                                                                                                                                                                                                                                                                               |      |                                                    |                                           |                                                                                                                                                                                                                                                                                                                                                                                                 |                                                                                |                                                                                                                                                                                                                                                                                                                                                                                                                                                                                                                                                                                                                                                                                                                                                                                                                                                                                                                                                                                                                                                                                                                                                                                                                                                                                                               |              |                                                 |     |                                                                                                                                                          |       |                                                                                                                                                                                                                                                                                                                                                                                                                                             |                   |                     |           |              |                                                                                                                                                                                                                                                                                                                                                                                                                                                                                                                                                                                                                                                                                                                                                                                                                      |                                                                                                                                                |                   |   |                                                                                                                                                                                                                                                                                                                                                                                                                                                                    |                                                                                                                   |
| Living arrangement                | -                                                                                                                                                                                                                                                                                                                                                                                                                                                                                                                                                                                                                                                                                                                                                                                                                                                                                                                                                                                                                                                                                                                                                                                                                                                                                                             | -                                                                                                                                                                                                                                                                                                                                                                                                                                                                                                                                                                                                                                                                                                                                                                                                                                                                                                                                                                                                                                                                                                                                                                                                                                                                                                                                                                                                                                                                                                                                                                                                 |   |     |     |              |        |        |           |    |                    |                 |                   |                    |       |   |                                                                                  |                                                                                                                                                                                                                                                                                                                                                                                                                                                                                                                                                                                                                                                                                                                                                                                                                                                                                                                                                                                                                                                                                                                                                                                                                                                                                                                                                                                                                                                                                                                                                                                                                                                                                                                                                                                                                                                                                                                                                                                                                                                                                                                                                                                                                               |      |                                                    |                                           |                                                                                                                                                                                                                                                                                                                                                                                                 |                                                                                |                                                                                                                                                                                                                                                                                                                                                                                                                                                                                                                                                                                                                                                                                                                                                                                                                                                                                                                                                                                                                                                                                                                                                                                                                                                                                                               |              |                                                 |     |                                                                                                                                                          |       |                                                                                                                                                                                                                                                                                                                                                                                                                                             |                   |                     |           |              |                                                                                                                                                                                                                                                                                                                                                                                                                                                                                                                                                                                                                                                                                                                                                                                                                      |                                                                                                                                                |                   |   |                                                                                                                                                                                                                                                                                                                                                                                                                                                                    |                                                                                                                   |
| Employment status                 | -                                                                                                                                                                                                                                                                                                                                                                                                                                                                                                                                                                                                                                                                                                                                                                                                                                                                                                                                                                                                                                                                                                                                                                                                                                                                                                             | -                                                                                                                                                                                                                                                                                                                                                                                                                                                                                                                                                                                                                                                                                                                                                                                                                                                                                                                                                                                                                                                                                                                                                                                                                                                                                                                                                                                                                                                                                                                                                                                                 |   |     |     |              |        |        |           |    |                    |                 |                   |                    |       |   |                                                                                  |                                                                                                                                                                                                                                                                                                                                                                                                                                                                                                                                                                                                                                                                                                                                                                                                                                                                                                                                                                                                                                                                                                                                                                                                                                                                                                                                                                                                                                                                                                                                                                                                                                                                                                                                                                                                                                                                                                                                                                                                                                                                                                                                                                                                                               |      |                                                    |                                           |                                                                                                                                                                                                                                                                                                                                                                                                 |                                                                                |                                                                                                                                                                                                                                                                                                                                                                                                                                                                                                                                                                                                                                                                                                                                                                                                                                                                                                                                                                                                                                                                                                                                                                                                                                                                                                               |              |                                                 |     |                                                                                                                                                          |       |                                                                                                                                                                                                                                                                                                                                                                                                                                             |                   |                     |           |              |                                                                                                                                                                                                                                                                                                                                                                                                                                                                                                                                                                                                                                                                                                                                                                                                                      |                                                                                                                                                |                   |   |                                                                                                                                                                                                                                                                                                                                                                                                                                                                    |                                                                                                                   |
| Other                             | Service users with at least one long-term                                                                                                                                                                                                                                                                                                                                                                                                                                                                                                                                                                                                                                                                                                                                                                                                                                                                                                                                                                                                                                                                                                                                                                                                                                                                     | 77                                                                                                                                                                                                                                                                                                                                                                                                                                                                                                                                                                                                                                                                                                                                                                                                                                                                                                                                                                                                                                                                                                                                                                                                                                                                                                                                                                                                                                                                                                                                                                                                |   |     |     |              |        |        |           |    |                    |                 |                   |                    |       |   |                                                                                  |                                                                                                                                                                                                                                                                                                                                                                                                                                                                                                                                                                                                                                                                                                                                                                                                                                                                                                                                                                                                                                                                                                                                                                                                                                                                                                                                                                                                                                                                                                                                                                                                                                                                                                                                                                                                                                                                                                                                                                                                                                                                                                                                                                                                                               |      |                                                    |                                           |                                                                                                                                                                                                                                                                                                                                                                                                 |                                                                                |                                                                                                                                                                                                                                                                                                                                                                                                                                                                                                                                                                                                                                                                                                                                                                                                                                                                                                                                                                                                                                                                                                                                                                                                                                                                                                               |              |                                                 |     |                                                                                                                                                          |       |                                                                                                                                                                                                                                                                                                                                                                                                                                             |                   |                     |           |              |                                                                                                                                                                                                                                                                                                                                                                                                                                                                                                                                                                                                                                                                                                                                                                                                                      |                                                                                                                                                |                   |   |                                                                                                                                                                                                                                                                                                                                                                                                                                                                    |                                                                                                                   |
| Name                              | Community Connectors Social Prescribing Service                                                                                                                                                                                                                                                                                                                                                                                                                                                                                                                                                                                                                                                                                                                                                                                                                                                                                                                                                                                                                                                                                                                                                                                                                                                               |                                                                                                                                                                                                                                                                                                                                                                                                                                                                                                                                                                                                                                                                                                                                                                                                                                                                                                                                                                                                                                                                                                                                                                                                                                                                                                                                                                                                                                                                                                                                                                                                   |   |     |     |              |        |        |           |    |                    |                 |                   |                    |       |   |                                                                                  |                                                                                                                                                                                                                                                                                                                                                                                                                                                                                                                                                                                                                                                                                                                                                                                                                                                                                                                                                                                                                                                                                                                                                                                                                                                                                                                                                                                                                                                                                                                                                                                                                                                                                                                                                                                                                                                                                                                                                                                                                                                                                                                                                                                                                               |      |                                                    |                                           |                                                                                                                                                                                                                                                                                                                                                                                                 |                                                                                |                                                                                                                                                                                                                                                                                                                                                                                                                                                                                                                                                                                                                                                                                                                                                                                                                                                                                                                                                                                                                                                                                                                                                                                                                                                                                                               |              |                                                 |     |                                                                                                                                                          |       |                                                                                                                                                                                                                                                                                                                                                                                                                                             |                   |                     |           |              |                                                                                                                                                                                                                                                                                                                                                                                                                                                                                                                                                                                                                                                                                                                                                                                                                      |                                                                                                                                                |                   |   |                                                                                                                                                                                                                                                                                                                                                                                                                                                                    |                                                                                                                   |
| Why                               | Improve the health, well-being and social connectedness of local people, reduce unplanned and unnecessary demand on primary and secondary health service                                                                                                                                                                                                                                                                                                                                                                                                                                                                                                                                                                                                                                                                                                                                                                                                                                                                                                                                                                                                                                                                                                                                                      |                                                                                                                                                                                                                                                                                                                                                                                                                                                                                                                                                                                                                                                                                                                                                                                                                                                                                                                                                                                                                                                                                                                                                                                                                                                                                                                                                                                                                                                                                                                                                                                                   |   |     |     |              |        |        |           |    |                    |                 |                   |                    |       |   |                                                                                  |                                                                                                                                                                                                                                                                                                                                                                                                                                                                                                                                                                                                                                                                                                                                                                                                                                                                                                                                                                                                                                                                                                                                                                                                                                                                                                                                                                                                                                                                                                                                                                                                                                                                                                                                                                                                                                                                                                                                                                                                                                                                                                                                                                                                                               |      |                                                    |                                           |                                                                                                                                                                                                                                                                                                                                                                                                 |                                                                                |                                                                                                                                                                                                                                                                                                                                                                                                                                                                                                                                                                                                                                                                                                                                                                                                                                                                                                                                                                                                                                                                                                                                                                                                                                                                                                               |              |                                                 |     |                                                                                                                                                          |       |                                                                                                                                                                                                                                                                                                                                                                                                                                             |                   |                     |           |              |                                                                                                                                                                                                                                                                                                                                                                                                                                                                                                                                                                                                                                                                                                                                                                                                                      |                                                                                                                                                |                   |   |                                                                                                                                                                                                                                                                                                                                                                                                                                                                    |                                                                                                                   |
| What                              | <p>Referral from a GP of patients, followed by a home visit from a Community Connector during which they find out what people are interested in, identify what services and activities are available locally that fit those interests, and then help people access them</p> <p>-if a patient is lacking in confidence the Connector will go along with them to a service or activity until they are confident enough to go on their own</p>                                                                                                                                                                                                                                                                                                                                                                                                                                                                                                                                                                                                                                                                                                                                                                                                                                                                   |                                                                                                                                                                                                                                                                                                                                                                                                                                                                                                                                                                                                                                                                                                                                                                                                                                                                                                                                                                                                                                                                                                                                                                                                                                                                                                                                                                                                                                                                                                                                                                                                   |   |     |     |              |        |        |           |    |                    |                 |                   |                    |       |   |                                                                                  |                                                                                                                                                                                                                                                                                                                                                                                                                                                                                                                                                                                                                                                                                                                                                                                                                                                                                                                                                                                                                                                                                                                                                                                                                                                                                                                                                                                                                                                                                                                                                                                                                                                                                                                                                                                                                                                                                                                                                                                                                                                                                                                                                                                                                               |      |                                                    |                                           |                                                                                                                                                                                                                                                                                                                                                                                                 |                                                                                |                                                                                                                                                                                                                                                                                                                                                                                                                                                                                                                                                                                                                                                                                                                                                                                                                                                                                                                                                                                                                                                                                                                                                                                                                                                                                                               |              |                                                 |     |                                                                                                                                                          |       |                                                                                                                                                                                                                                                                                                                                                                                                                                             |                   |                     |           |              |                                                                                                                                                                                                                                                                                                                                                                                                                                                                                                                                                                                                                                                                                                                                                                                                                      |                                                                                                                                                |                   |   |                                                                                                                                                                                                                                                                                                                                                                                                                                                                    |                                                                                                                   |
| Who provided                      | Community Connector                                                                                                                                                                                                                                                                                                                                                                                                                                                                                                                                                                                                                                                                                                                                                                                                                                                                                                                                                                                                                                                                                                                                                                                                                                                                                           |                                                                                                                                                                                                                                                                                                                                                                                                                                                                                                                                                                                                                                                                                                                                                                                                                                                                                                                                                                                                                                                                                                                                                                                                                                                                                                                                                                                                                                                                                                                                                                                                   |   |     |     |              |        |        |           |    |                    |                 |                   |                    |       |   |                                                                                  |                                                                                                                                                                                                                                                                                                                                                                                                                                                                                                                                                                                                                                                                                                                                                                                                                                                                                                                                                                                                                                                                                                                                                                                                                                                                                                                                                                                                                                                                                                                                                                                                                                                                                                                                                                                                                                                                                                                                                                                                                                                                                                                                                                                                                               |      |                                                    |                                           |                                                                                                                                                                                                                                                                                                                                                                                                 |                                                                                |                                                                                                                                                                                                                                                                                                                                                                                                                                                                                                                                                                                                                                                                                                                                                                                                                                                                                                                                                                                                                                                                                                                                                                                                                                                                                                               |              |                                                 |     |                                                                                                                                                          |       |                                                                                                                                                                                                                                                                                                                                                                                                                                             |                   |                     |           |              |                                                                                                                                                                                                                                                                                                                                                                                                                                                                                                                                                                                                                                                                                                                                                                                                                      |                                                                                                                                                |                   |   |                                                                                                                                                                                                                                                                                                                                                                                                                                                                    |                                                                                                                   |
| How                               | Face-to-face                                                                                                                                                                                                                                                                                                                                                                                                                                                                                                                                                                                                                                                                                                                                                                                                                                                                                                                                                                                                                                                                                                                                                                                                                                                                                                  |                                                                                                                                                                                                                                                                                                                                                                                                                                                                                                                                                                                                                                                                                                                                                                                                                                                                                                                                                                                                                                                                                                                                                                                                                                                                                                                                                                                                                                                                                                                                                                                                   |   |     |     |              |        |        |           |    |                    |                 |                   |                    |       |   |                                                                                  |                                                                                                                                                                                                                                                                                                                                                                                                                                                                                                                                                                                                                                                                                                                                                                                                                                                                                                                                                                                                                                                                                                                                                                                                                                                                                                                                                                                                                                                                                                                                                                                                                                                                                                                                                                                                                                                                                                                                                                                                                                                                                                                                                                                                                               |      |                                                    |                                           |                                                                                                                                                                                                                                                                                                                                                                                                 |                                                                                |                                                                                                                                                                                                                                                                                                                                                                                                                                                                                                                                                                                                                                                                                                                                                                                                                                                                                                                                                                                                                                                                                                                                                                                                                                                                                                               |              |                                                 |     |                                                                                                                                                          |       |                                                                                                                                                                                                                                                                                                                                                                                                                                             |                   |                     |           |              |                                                                                                                                                                                                                                                                                                                                                                                                                                                                                                                                                                                                                                                                                                                                                                                                                      |                                                                                                                                                |                   |   |                                                                                                                                                                                                                                                                                                                                                                                                                                                                    |                                                                                                                   |
| Where                             | Home visit or meeting in a mutually agreed setting                                                                                                                                                                                                                                                                                                                                                                                                                                                                                                                                                                                                                                                                                                                                                                                                                                                                                                                                                                                                                                                                                                                                                                                                                                                            |                                                                                                                                                                                                                                                                                                                                                                                                                                                                                                                                                                                                                                                                                                                                                                                                                                                                                                                                                                                                                                                                                                                                                                                                                                                                                                                                                                                                                                                                                                                                                                                                   |   |     |     |              |        |        |           |    |                    |                 |                   |                    |       |   |                                                                                  |                                                                                                                                                                                                                                                                                                                                                                                                                                                                                                                                                                                                                                                                                                                                                                                                                                                                                                                                                                                                                                                                                                                                                                                                                                                                                                                                                                                                                                                                                                                                                                                                                                                                                                                                                                                                                                                                                                                                                                                                                                                                                                                                                                                                                               |      |                                                    |                                           |                                                                                                                                                                                                                                                                                                                                                                                                 |                                                                                |                                                                                                                                                                                                                                                                                                                                                                                                                                                                                                                                                                                                                                                                                                                                                                                                                                                                                                                                                                                                                                                                                                                                                                                                                                                                                                               |              |                                                 |     |                                                                                                                                                          |       |                                                                                                                                                                                                                                                                                                                                                                                                                                             |                   |                     |           |              |                                                                                                                                                                                                                                                                                                                                                                                                                                                                                                                                                                                                                                                                                                                                                                                                                      |                                                                                                                                                |                   |   |                                                                                                                                                                                                                                                                                                                                                                                                                                                                    |                                                                                                                   |
| When and How Much                 | -                                                                                                                                                                                                                                                                                                                                                                                                                                                                                                                                                                                                                                                                                                                                                                                                                                                                                                                                                                                                                                                                                                                                                                                                                                                                                                             |                                                                                                                                                                                                                                                                                                                                                                                                                                                                                                                                                                                                                                                                                                                                                                                                                                                                                                                                                                                                                                                                                                                                                                                                                                                                                                                                                                                                                                                                                                                                                                                                   |   |     |     |              |        |        |           |    |                    |                 |                   |                    |       |   |                                                                                  |                                                                                                                                                                                                                                                                                                                                                                                                                                                                                                                                                                                                                                                                                                                                                                                                                                                                                                                                                                                                                                                                                                                                                                                                                                                                                                                                                                                                                                                                                                                                                                                                                                                                                                                                                                                                                                                                                                                                                                                                                                                                                                                                                                                                                               |      |                                                    |                                           |                                                                                                                                                                                                                                                                                                                                                                                                 |                                                                                |                                                                                                                                                                                                                                                                                                                                                                                                                                                                                                                                                                                                                                                                                                                                                                                                                                                                                                                                                                                                                                                                                                                                                                                                                                                                                                               |              |                                                 |     |                                                                                                                                                          |       |                                                                                                                                                                                                                                                                                                                                                                                                                                             |                   |                     |           |              |                                                                                                                                                                                                                                                                                                                                                                                                                                                                                                                                                                                                                                                                                                                                                                                                                      |                                                                                                                                                |                   |   |                                                                                                                                                                                                                                                                                                                                                                                                                                                                    |                                                                                                                   |

|                      |                                                                                                                                                                                                                                                                                                                                                                                                                                                                                                                                                                                                                                                                                                                                                                                                                                                                                     |                                                                                                                                                                                                                                                                                                                                                                                                                                                                                                                                                                                   |   |             |      |     |                                               |    |        |                                                                                                                               |           |                              |                                                                                                                                                                                                 |    |                    |   |   |                   |   |   |       |   |   |                                                                              |                                                                                                                                                                                                                                                                                                                                                                                                                                                                                                                                                                                                                                                                                                                                                                                                                                                                                                                                                                                                                                                                                                                                                                                                                                                                                                                                                                                                                                                                                                                                                                                                                   |      |                                             |     |                                                                                                                                                                                |      |                                                                                                                                                                                                                                                                                                                                                                                                                                                                                                                                                                                                                                                                                                                                                                                                                                                                                     |              |                                                                                                     |     |   |       |            |                   |   |           |              |                                                                                                                                                                                                                                                                                                                                                                                                           |                                                                                                                                              |
|----------------------|-------------------------------------------------------------------------------------------------------------------------------------------------------------------------------------------------------------------------------------------------------------------------------------------------------------------------------------------------------------------------------------------------------------------------------------------------------------------------------------------------------------------------------------------------------------------------------------------------------------------------------------------------------------------------------------------------------------------------------------------------------------------------------------------------------------------------------------------------------------------------------------|-----------------------------------------------------------------------------------------------------------------------------------------------------------------------------------------------------------------------------------------------------------------------------------------------------------------------------------------------------------------------------------------------------------------------------------------------------------------------------------------------------------------------------------------------------------------------------------|---|-------------|------|-----|-----------------------------------------------|----|--------|-------------------------------------------------------------------------------------------------------------------------------|-----------|------------------------------|-------------------------------------------------------------------------------------------------------------------------------------------------------------------------------------------------|----|--------------------|---|---|-------------------|---|---|-------|---|---|------------------------------------------------------------------------------|-------------------------------------------------------------------------------------------------------------------------------------------------------------------------------------------------------------------------------------------------------------------------------------------------------------------------------------------------------------------------------------------------------------------------------------------------------------------------------------------------------------------------------------------------------------------------------------------------------------------------------------------------------------------------------------------------------------------------------------------------------------------------------------------------------------------------------------------------------------------------------------------------------------------------------------------------------------------------------------------------------------------------------------------------------------------------------------------------------------------------------------------------------------------------------------------------------------------------------------------------------------------------------------------------------------------------------------------------------------------------------------------------------------------------------------------------------------------------------------------------------------------------------------------------------------------------------------------------------------------|------|---------------------------------------------|-----|--------------------------------------------------------------------------------------------------------------------------------------------------------------------------------|------|-------------------------------------------------------------------------------------------------------------------------------------------------------------------------------------------------------------------------------------------------------------------------------------------------------------------------------------------------------------------------------------------------------------------------------------------------------------------------------------------------------------------------------------------------------------------------------------------------------------------------------------------------------------------------------------------------------------------------------------------------------------------------------------------------------------------------------------------------------------------------------------|--------------|-----------------------------------------------------------------------------------------------------|-----|---|-------|------------|-------------------|---|-----------|--------------|-----------------------------------------------------------------------------------------------------------------------------------------------------------------------------------------------------------------------------------------------------------------------------------------------------------------------------------------------------------------------------------------------------------|----------------------------------------------------------------------------------------------------------------------------------------------|
|                      |                                                                                                                                                                                                                                                                                                                                                                                                                                                                                                                                                                                                                                                                                                                                                                                                                                                                                     | <table border="1"> <tr> <td></td> <td>condition %</td> <td></td> </tr> <tr> <td></td> <td>Most common long-term condition: depression %</td> <td>47</td> </tr> </table> <p>Population: General</p>                                                                                                                                                                                                                                                                                                                                                                                |   | condition % |      |     | Most common long-term condition: depression % | 47 |        | <table border="1"> <tr> <td>Tailoring</td> <td>Personalized recommendations</td> </tr> </table> <p>Intervention: Holistic</p> | Tailoring | Personalized recommendations | <ul style="list-style-type: none"> <li>- Number of Accident and Emergency Community Connector service users</li> <li>- Number of GP engagements by Community Connector service users</li> </ul> |    |                    |   |   |                   |   |   |       |   |   |                                                                              |                                                                                                                                                                                                                                                                                                                                                                                                                                                                                                                                                                                                                                                                                                                                                                                                                                                                                                                                                                                                                                                                                                                                                                                                                                                                                                                                                                                                                                                                                                                                                                                                                   |      |                                             |     |                                                                                                                                                                                |      |                                                                                                                                                                                                                                                                                                                                                                                                                                                                                                                                                                                                                                                                                                                                                                                                                                                                                     |              |                                                                                                     |     |   |       |            |                   |   |           |              |                                                                                                                                                                                                                                                                                                                                                                                                           |                                                                                                                                              |
|                      | condition %                                                                                                                                                                                                                                                                                                                                                                                                                                                                                                                                                                                                                                                                                                                                                                                                                                                                         |                                                                                                                                                                                                                                                                                                                                                                                                                                                                                                                                                                                   |   |             |      |     |                                               |    |        |                                                                                                                               |           |                              |                                                                                                                                                                                                 |    |                    |   |   |                   |   |   |       |   |   |                                                                              |                                                                                                                                                                                                                                                                                                                                                                                                                                                                                                                                                                                                                                                                                                                                                                                                                                                                                                                                                                                                                                                                                                                                                                                                                                                                                                                                                                                                                                                                                                                                                                                                                   |      |                                             |     |                                                                                                                                                                                |      |                                                                                                                                                                                                                                                                                                                                                                                                                                                                                                                                                                                                                                                                                                                                                                                                                                                                                     |              |                                                                                                     |     |   |       |            |                   |   |           |              |                                                                                                                                                                                                                                                                                                                                                                                                           |                                                                                                                                              |
|                      | Most common long-term condition: depression %                                                                                                                                                                                                                                                                                                                                                                                                                                                                                                                                                                                                                                                                                                                                                                                                                                       | 47                                                                                                                                                                                                                                                                                                                                                                                                                                                                                                                                                                                |   |             |      |     |                                               |    |        |                                                                                                                               |           |                              |                                                                                                                                                                                                 |    |                    |   |   |                   |   |   |       |   |   |                                                                              |                                                                                                                                                                                                                                                                                                                                                                                                                                                                                                                                                                                                                                                                                                                                                                                                                                                                                                                                                                                                                                                                                                                                                                                                                                                                                                                                                                                                                                                                                                                                                                                                                   |      |                                             |     |                                                                                                                                                                                |      |                                                                                                                                                                                                                                                                                                                                                                                                                                                                                                                                                                                                                                                                                                                                                                                                                                                                                     |              |                                                                                                     |     |   |       |            |                   |   |           |              |                                                                                                                                                                                                                                                                                                                                                                                                           |                                                                                                                                              |
| Tailoring            | Personalized recommendations                                                                                                                                                                                                                                                                                                                                                                                                                                                                                                                                                                                                                                                                                                                                                                                                                                                        |                                                                                                                                                                                                                                                                                                                                                                                                                                                                                                                                                                                   |   |             |      |     |                                               |    |        |                                                                                                                               |           |                              |                                                                                                                                                                                                 |    |                    |   |   |                   |   |   |       |   |   |                                                                              |                                                                                                                                                                                                                                                                                                                                                                                                                                                                                                                                                                                                                                                                                                                                                                                                                                                                                                                                                                                                                                                                                                                                                                                                                                                                                                                                                                                                                                                                                                                                                                                                                   |      |                                             |     |                                                                                                                                                                                |      |                                                                                                                                                                                                                                                                                                                                                                                                                                                                                                                                                                                                                                                                                                                                                                                                                                                                                     |              |                                                                                                     |     |   |       |            |                   |   |           |              |                                                                                                                                                                                                                                                                                                                                                                                                           |                                                                                                                                              |
| Dayson 2020 (a) (55) | <p>Uncontrolled before-and-after study</p> <p>Study length: 36 months</p>                                                                                                                                                                                                                                                                                                                                                                                                                                                                                                                                                                                                                                                                                                                                                                                                           | <p><b>Inclusion criteria:</b> -</p> <p><b>Exclusion criteria:</b> -</p> <p>Baseline characteristics:</p> <table border="1"> <tr> <td>N</td> <td></td> <td>1730</td> </tr> <tr> <td>Age</td> <td>Age group 80-89 %</td> <td>98</td> </tr> <tr> <td>Gender</td> <td>Female %</td> <td>60</td> </tr> <tr> <td>Ethnicity</td> <td>White British %</td> <td>98</td> </tr> <tr> <td>Living arrangement</td> <td>-</td> <td>-</td> </tr> <tr> <td>Employment status</td> <td>-</td> <td>-</td> </tr> <tr> <td>Other</td> <td>-</td> <td>-</td> </tr> </table> <p>Population: Unclear</p> | N |             | 1730 | Age | Age group 80-89 %                             | 98 | Gender | Female %                                                                                                                      | 60        | Ethnicity                    | White British %                                                                                                                                                                                 | 98 | Living arrangement | - | - | Employment status | - | - | Other | - | - | <p>Primary care</p> <p>Country: UK (Rotherham, South Yorkshire, England)</p> | <table border="1"> <tr> <td>Name</td> <td>Rotherham Social Prescribing Service (RSPS)</td> </tr> <tr> <td>Why</td> <td>To increase the capacity of GPs to meet the non-clinical needs of patients with complex long-term conditions (LTCs) who are the most intensive users of primary care resources</td> </tr> <tr> <td>What</td> <td>GP-led Integrated Case Management. It is delivered by Voluntary Action Rotherham (VAR) in partnership with more than 20 local voluntary and community organisations (VCOs). Specific support for the carers of case-managed patients is also provided voluntary and community sector (VCS) liaison service for the whole borough which: Enables patients and their carers to access support from local VCS organisations. Contributes a VCS perspective to the assessment of needs and care planning for patients referred to multi-disciplinary Integrated Case Management Teams (ICMTs). Facilitates the development of new community-based services to fill gaps in provision, and funds additional capacity within existing VCS to meet the increase in demand created by RSPS. make an assessment of their support needs before referring them on to appropriate VCS services.</td> </tr> <tr> <td>Who provided</td> <td>Core team consisting of a Service Manager and seven Voluntary and Community Sector Advisors (VCSAs)</td> </tr> <tr> <td>How</td> <td>-</td> </tr> <tr> <td>Where</td> <td>Home visit</td> </tr> <tr> <td>When and How Much</td> <td>-</td> </tr> <tr> <td>Tailoring</td> <td>Personalized</td> </tr> </table> <p>Intervention: Holistic</p> | Name | Rotherham Social Prescribing Service (RSPS) | Why | To increase the capacity of GPs to meet the non-clinical needs of patients with complex long-term conditions (LTCs) who are the most intensive users of primary care resources | What | GP-led Integrated Case Management. It is delivered by Voluntary Action Rotherham (VAR) in partnership with more than 20 local voluntary and community organisations (VCOs). Specific support for the carers of case-managed patients is also provided voluntary and community sector (VCS) liaison service for the whole borough which: Enables patients and their carers to access support from local VCS organisations. Contributes a VCS perspective to the assessment of needs and care planning for patients referred to multi-disciplinary Integrated Case Management Teams (ICMTs). Facilitates the development of new community-based services to fill gaps in provision, and funds additional capacity within existing VCS to meet the increase in demand created by RSPS. make an assessment of their support needs before referring them on to appropriate VCS services. | Who provided | Core team consisting of a Service Manager and seven Voluntary and Community Sector Advisors (VCSAs) | How | - | Where | Home visit | When and How Much | - | Tailoring | Personalized | <p>Patient outcomes at baseline and 4-6 months after referral via questionnaire:</p> <ul style="list-style-type: none"> <li>- Wellbeing outcome tool (eight components)</li> </ul> <p>Process of care measures at 12 months before and 12 months after referral:</p> <ul style="list-style-type: none"> <li>- Number of non-elective inpatient spells</li> <li>- Number of A&amp;E attendances</li> </ul> | <p>Peer-Review: no</p> <p>Funding source: NHS Rotherham Clinical Commissioning Group (CCG)</p> <p>Declaration of interest: not mentioned</p> |
| N                    |                                                                                                                                                                                                                                                                                                                                                                                                                                                                                                                                                                                                                                                                                                                                                                                                                                                                                     | 1730                                                                                                                                                                                                                                                                                                                                                                                                                                                                                                                                                                              |   |             |      |     |                                               |    |        |                                                                                                                               |           |                              |                                                                                                                                                                                                 |    |                    |   |   |                   |   |   |       |   |   |                                                                              |                                                                                                                                                                                                                                                                                                                                                                                                                                                                                                                                                                                                                                                                                                                                                                                                                                                                                                                                                                                                                                                                                                                                                                                                                                                                                                                                                                                                                                                                                                                                                                                                                   |      |                                             |     |                                                                                                                                                                                |      |                                                                                                                                                                                                                                                                                                                                                                                                                                                                                                                                                                                                                                                                                                                                                                                                                                                                                     |              |                                                                                                     |     |   |       |            |                   |   |           |              |                                                                                                                                                                                                                                                                                                                                                                                                           |                                                                                                                                              |
| Age                  | Age group 80-89 %                                                                                                                                                                                                                                                                                                                                                                                                                                                                                                                                                                                                                                                                                                                                                                                                                                                                   | 98                                                                                                                                                                                                                                                                                                                                                                                                                                                                                                                                                                                |   |             |      |     |                                               |    |        |                                                                                                                               |           |                              |                                                                                                                                                                                                 |    |                    |   |   |                   |   |   |       |   |   |                                                                              |                                                                                                                                                                                                                                                                                                                                                                                                                                                                                                                                                                                                                                                                                                                                                                                                                                                                                                                                                                                                                                                                                                                                                                                                                                                                                                                                                                                                                                                                                                                                                                                                                   |      |                                             |     |                                                                                                                                                                                |      |                                                                                                                                                                                                                                                                                                                                                                                                                                                                                                                                                                                                                                                                                                                                                                                                                                                                                     |              |                                                                                                     |     |   |       |            |                   |   |           |              |                                                                                                                                                                                                                                                                                                                                                                                                           |                                                                                                                                              |
| Gender               | Female %                                                                                                                                                                                                                                                                                                                                                                                                                                                                                                                                                                                                                                                                                                                                                                                                                                                                            | 60                                                                                                                                                                                                                                                                                                                                                                                                                                                                                                                                                                                |   |             |      |     |                                               |    |        |                                                                                                                               |           |                              |                                                                                                                                                                                                 |    |                    |   |   |                   |   |   |       |   |   |                                                                              |                                                                                                                                                                                                                                                                                                                                                                                                                                                                                                                                                                                                                                                                                                                                                                                                                                                                                                                                                                                                                                                                                                                                                                                                                                                                                                                                                                                                                                                                                                                                                                                                                   |      |                                             |     |                                                                                                                                                                                |      |                                                                                                                                                                                                                                                                                                                                                                                                                                                                                                                                                                                                                                                                                                                                                                                                                                                                                     |              |                                                                                                     |     |   |       |            |                   |   |           |              |                                                                                                                                                                                                                                                                                                                                                                                                           |                                                                                                                                              |
| Ethnicity            | White British %                                                                                                                                                                                                                                                                                                                                                                                                                                                                                                                                                                                                                                                                                                                                                                                                                                                                     | 98                                                                                                                                                                                                                                                                                                                                                                                                                                                                                                                                                                                |   |             |      |     |                                               |    |        |                                                                                                                               |           |                              |                                                                                                                                                                                                 |    |                    |   |   |                   |   |   |       |   |   |                                                                              |                                                                                                                                                                                                                                                                                                                                                                                                                                                                                                                                                                                                                                                                                                                                                                                                                                                                                                                                                                                                                                                                                                                                                                                                                                                                                                                                                                                                                                                                                                                                                                                                                   |      |                                             |     |                                                                                                                                                                                |      |                                                                                                                                                                                                                                                                                                                                                                                                                                                                                                                                                                                                                                                                                                                                                                                                                                                                                     |              |                                                                                                     |     |   |       |            |                   |   |           |              |                                                                                                                                                                                                                                                                                                                                                                                                           |                                                                                                                                              |
| Living arrangement   | -                                                                                                                                                                                                                                                                                                                                                                                                                                                                                                                                                                                                                                                                                                                                                                                                                                                                                   | -                                                                                                                                                                                                                                                                                                                                                                                                                                                                                                                                                                                 |   |             |      |     |                                               |    |        |                                                                                                                               |           |                              |                                                                                                                                                                                                 |    |                    |   |   |                   |   |   |       |   |   |                                                                              |                                                                                                                                                                                                                                                                                                                                                                                                                                                                                                                                                                                                                                                                                                                                                                                                                                                                                                                                                                                                                                                                                                                                                                                                                                                                                                                                                                                                                                                                                                                                                                                                                   |      |                                             |     |                                                                                                                                                                                |      |                                                                                                                                                                                                                                                                                                                                                                                                                                                                                                                                                                                                                                                                                                                                                                                                                                                                                     |              |                                                                                                     |     |   |       |            |                   |   |           |              |                                                                                                                                                                                                                                                                                                                                                                                                           |                                                                                                                                              |
| Employment status    | -                                                                                                                                                                                                                                                                                                                                                                                                                                                                                                                                                                                                                                                                                                                                                                                                                                                                                   | -                                                                                                                                                                                                                                                                                                                                                                                                                                                                                                                                                                                 |   |             |      |     |                                               |    |        |                                                                                                                               |           |                              |                                                                                                                                                                                                 |    |                    |   |   |                   |   |   |       |   |   |                                                                              |                                                                                                                                                                                                                                                                                                                                                                                                                                                                                                                                                                                                                                                                                                                                                                                                                                                                                                                                                                                                                                                                                                                                                                                                                                                                                                                                                                                                                                                                                                                                                                                                                   |      |                                             |     |                                                                                                                                                                                |      |                                                                                                                                                                                                                                                                                                                                                                                                                                                                                                                                                                                                                                                                                                                                                                                                                                                                                     |              |                                                                                                     |     |   |       |            |                   |   |           |              |                                                                                                                                                                                                                                                                                                                                                                                                           |                                                                                                                                              |
| Other                | -                                                                                                                                                                                                                                                                                                                                                                                                                                                                                                                                                                                                                                                                                                                                                                                                                                                                                   | -                                                                                                                                                                                                                                                                                                                                                                                                                                                                                                                                                                                 |   |             |      |     |                                               |    |        |                                                                                                                               |           |                              |                                                                                                                                                                                                 |    |                    |   |   |                   |   |   |       |   |   |                                                                              |                                                                                                                                                                                                                                                                                                                                                                                                                                                                                                                                                                                                                                                                                                                                                                                                                                                                                                                                                                                                                                                                                                                                                                                                                                                                                                                                                                                                                                                                                                                                                                                                                   |      |                                             |     |                                                                                                                                                                                |      |                                                                                                                                                                                                                                                                                                                                                                                                                                                                                                                                                                                                                                                                                                                                                                                                                                                                                     |              |                                                                                                     |     |   |       |            |                   |   |           |              |                                                                                                                                                                                                                                                                                                                                                                                                           |                                                                                                                                              |
| Name                 | Rotherham Social Prescribing Service (RSPS)                                                                                                                                                                                                                                                                                                                                                                                                                                                                                                                                                                                                                                                                                                                                                                                                                                         |                                                                                                                                                                                                                                                                                                                                                                                                                                                                                                                                                                                   |   |             |      |     |                                               |    |        |                                                                                                                               |           |                              |                                                                                                                                                                                                 |    |                    |   |   |                   |   |   |       |   |   |                                                                              |                                                                                                                                                                                                                                                                                                                                                                                                                                                                                                                                                                                                                                                                                                                                                                                                                                                                                                                                                                                                                                                                                                                                                                                                                                                                                                                                                                                                                                                                                                                                                                                                                   |      |                                             |     |                                                                                                                                                                                |      |                                                                                                                                                                                                                                                                                                                                                                                                                                                                                                                                                                                                                                                                                                                                                                                                                                                                                     |              |                                                                                                     |     |   |       |            |                   |   |           |              |                                                                                                                                                                                                                                                                                                                                                                                                           |                                                                                                                                              |
| Why                  | To increase the capacity of GPs to meet the non-clinical needs of patients with complex long-term conditions (LTCs) who are the most intensive users of primary care resources                                                                                                                                                                                                                                                                                                                                                                                                                                                                                                                                                                                                                                                                                                      |                                                                                                                                                                                                                                                                                                                                                                                                                                                                                                                                                                                   |   |             |      |     |                                               |    |        |                                                                                                                               |           |                              |                                                                                                                                                                                                 |    |                    |   |   |                   |   |   |       |   |   |                                                                              |                                                                                                                                                                                                                                                                                                                                                                                                                                                                                                                                                                                                                                                                                                                                                                                                                                                                                                                                                                                                                                                                                                                                                                                                                                                                                                                                                                                                                                                                                                                                                                                                                   |      |                                             |     |                                                                                                                                                                                |      |                                                                                                                                                                                                                                                                                                                                                                                                                                                                                                                                                                                                                                                                                                                                                                                                                                                                                     |              |                                                                                                     |     |   |       |            |                   |   |           |              |                                                                                                                                                                                                                                                                                                                                                                                                           |                                                                                                                                              |
| What                 | GP-led Integrated Case Management. It is delivered by Voluntary Action Rotherham (VAR) in partnership with more than 20 local voluntary and community organisations (VCOs). Specific support for the carers of case-managed patients is also provided voluntary and community sector (VCS) liaison service for the whole borough which: Enables patients and their carers to access support from local VCS organisations. Contributes a VCS perspective to the assessment of needs and care planning for patients referred to multi-disciplinary Integrated Case Management Teams (ICMTs). Facilitates the development of new community-based services to fill gaps in provision, and funds additional capacity within existing VCS to meet the increase in demand created by RSPS. make an assessment of their support needs before referring them on to appropriate VCS services. |                                                                                                                                                                                                                                                                                                                                                                                                                                                                                                                                                                                   |   |             |      |     |                                               |    |        |                                                                                                                               |           |                              |                                                                                                                                                                                                 |    |                    |   |   |                   |   |   |       |   |   |                                                                              |                                                                                                                                                                                                                                                                                                                                                                                                                                                                                                                                                                                                                                                                                                                                                                                                                                                                                                                                                                                                                                                                                                                                                                                                                                                                                                                                                                                                                                                                                                                                                                                                                   |      |                                             |     |                                                                                                                                                                                |      |                                                                                                                                                                                                                                                                                                                                                                                                                                                                                                                                                                                                                                                                                                                                                                                                                                                                                     |              |                                                                                                     |     |   |       |            |                   |   |           |              |                                                                                                                                                                                                                                                                                                                                                                                                           |                                                                                                                                              |
| Who provided         | Core team consisting of a Service Manager and seven Voluntary and Community Sector Advisors (VCSAs)                                                                                                                                                                                                                                                                                                                                                                                                                                                                                                                                                                                                                                                                                                                                                                                 |                                                                                                                                                                                                                                                                                                                                                                                                                                                                                                                                                                                   |   |             |      |     |                                               |    |        |                                                                                                                               |           |                              |                                                                                                                                                                                                 |    |                    |   |   |                   |   |   |       |   |   |                                                                              |                                                                                                                                                                                                                                                                                                                                                                                                                                                                                                                                                                                                                                                                                                                                                                                                                                                                                                                                                                                                                                                                                                                                                                                                                                                                                                                                                                                                                                                                                                                                                                                                                   |      |                                             |     |                                                                                                                                                                                |      |                                                                                                                                                                                                                                                                                                                                                                                                                                                                                                                                                                                                                                                                                                                                                                                                                                                                                     |              |                                                                                                     |     |   |       |            |                   |   |           |              |                                                                                                                                                                                                                                                                                                                                                                                                           |                                                                                                                                              |
| How                  | -                                                                                                                                                                                                                                                                                                                                                                                                                                                                                                                                                                                                                                                                                                                                                                                                                                                                                   |                                                                                                                                                                                                                                                                                                                                                                                                                                                                                                                                                                                   |   |             |      |     |                                               |    |        |                                                                                                                               |           |                              |                                                                                                                                                                                                 |    |                    |   |   |                   |   |   |       |   |   |                                                                              |                                                                                                                                                                                                                                                                                                                                                                                                                                                                                                                                                                                                                                                                                                                                                                                                                                                                                                                                                                                                                                                                                                                                                                                                                                                                                                                                                                                                                                                                                                                                                                                                                   |      |                                             |     |                                                                                                                                                                                |      |                                                                                                                                                                                                                                                                                                                                                                                                                                                                                                                                                                                                                                                                                                                                                                                                                                                                                     |              |                                                                                                     |     |   |       |            |                   |   |           |              |                                                                                                                                                                                                                                                                                                                                                                                                           |                                                                                                                                              |
| Where                | Home visit                                                                                                                                                                                                                                                                                                                                                                                                                                                                                                                                                                                                                                                                                                                                                                                                                                                                          |                                                                                                                                                                                                                                                                                                                                                                                                                                                                                                                                                                                   |   |             |      |     |                                               |    |        |                                                                                                                               |           |                              |                                                                                                                                                                                                 |    |                    |   |   |                   |   |   |       |   |   |                                                                              |                                                                                                                                                                                                                                                                                                                                                                                                                                                                                                                                                                                                                                                                                                                                                                                                                                                                                                                                                                                                                                                                                                                                                                                                                                                                                                                                                                                                                                                                                                                                                                                                                   |      |                                             |     |                                                                                                                                                                                |      |                                                                                                                                                                                                                                                                                                                                                                                                                                                                                                                                                                                                                                                                                                                                                                                                                                                                                     |              |                                                                                                     |     |   |       |            |                   |   |           |              |                                                                                                                                                                                                                                                                                                                                                                                                           |                                                                                                                                              |
| When and How Much    | -                                                                                                                                                                                                                                                                                                                                                                                                                                                                                                                                                                                                                                                                                                                                                                                                                                                                                   |                                                                                                                                                                                                                                                                                                                                                                                                                                                                                                                                                                                   |   |             |      |     |                                               |    |        |                                                                                                                               |           |                              |                                                                                                                                                                                                 |    |                    |   |   |                   |   |   |       |   |   |                                                                              |                                                                                                                                                                                                                                                                                                                                                                                                                                                                                                                                                                                                                                                                                                                                                                                                                                                                                                                                                                                                                                                                                                                                                                                                                                                                                                                                                                                                                                                                                                                                                                                                                   |      |                                             |     |                                                                                                                                                                                |      |                                                                                                                                                                                                                                                                                                                                                                                                                                                                                                                                                                                                                                                                                                                                                                                                                                                                                     |              |                                                                                                     |     |   |       |            |                   |   |           |              |                                                                                                                                                                                                                                                                                                                                                                                                           |                                                                                                                                              |
| Tailoring            | Personalized                                                                                                                                                                                                                                                                                                                                                                                                                                                                                                                                                                                                                                                                                                                                                                                                                                                                        |                                                                                                                                                                                                                                                                                                                                                                                                                                                                                                                                                                                   |   |             |      |     |                                               |    |        |                                                                                                                               |           |                              |                                                                                                                                                                                                 |    |                    |   |   |                   |   |   |       |   |   |                                                                              |                                                                                                                                                                                                                                                                                                                                                                                                                                                                                                                                                                                                                                                                                                                                                                                                                                                                                                                                                                                                                                                                                                                                                                                                                                                                                                                                                                                                                                                                                                                                                                                                                   |      |                                             |     |                                                                                                                                                                                |      |                                                                                                                                                                                                                                                                                                                                                                                                                                                                                                                                                                                                                                                                                                                                                                                                                                                                                     |              |                                                                                                     |     |   |       |            |                   |   |           |              |                                                                                                                                                                                                                                                                                                                                                                                                           |                                                                                                                                              |

|                             |                                                                                                                                                                                                                                                                                                                                                                                                                                                                                                                                                                     |                                                                                                                                                                                                                                                                                                                                                                                                                                                                                                                                                                                                                                                                                                                                                                                                                                                                                                                                                                                                                                                                  |   |  |      |     |              |    |                 |          |    |           |                 |    |                    |   |   |                   |   |   |       |                                        |    |                                                       |    |                                                                            |                                                                                                                                                                                                                                                                                                                                                                                                                                                                                                                                                                                                                                                                                                                                                                                                                                                                                                                                                                                                                                                                                                                                                                                                                                                                                                                                                                                                                                                            |      |                                                 |     |                                                                                                                                                           |      |                                                                                                                                                                                                                                                                                                                                                                                                                                                                                                                                                                     |              |                     |     |              |       |            |                   |                                                                                                                                                                                                  |           |                              |                                                                                                                                                                                                                                                                                                                        |                                                                                                           |
|-----------------------------|---------------------------------------------------------------------------------------------------------------------------------------------------------------------------------------------------------------------------------------------------------------------------------------------------------------------------------------------------------------------------------------------------------------------------------------------------------------------------------------------------------------------------------------------------------------------|------------------------------------------------------------------------------------------------------------------------------------------------------------------------------------------------------------------------------------------------------------------------------------------------------------------------------------------------------------------------------------------------------------------------------------------------------------------------------------------------------------------------------------------------------------------------------------------------------------------------------------------------------------------------------------------------------------------------------------------------------------------------------------------------------------------------------------------------------------------------------------------------------------------------------------------------------------------------------------------------------------------------------------------------------------------|---|--|------|-----|--------------|----|-----------------|----------|----|-----------|-----------------|----|--------------------|---|---|-------------------|---|---|-------|----------------------------------------|----|-------------------------------------------------------|----|----------------------------------------------------------------------------|------------------------------------------------------------------------------------------------------------------------------------------------------------------------------------------------------------------------------------------------------------------------------------------------------------------------------------------------------------------------------------------------------------------------------------------------------------------------------------------------------------------------------------------------------------------------------------------------------------------------------------------------------------------------------------------------------------------------------------------------------------------------------------------------------------------------------------------------------------------------------------------------------------------------------------------------------------------------------------------------------------------------------------------------------------------------------------------------------------------------------------------------------------------------------------------------------------------------------------------------------------------------------------------------------------------------------------------------------------------------------------------------------------------------------------------------------------|------|-------------------------------------------------|-----|-----------------------------------------------------------------------------------------------------------------------------------------------------------|------|---------------------------------------------------------------------------------------------------------------------------------------------------------------------------------------------------------------------------------------------------------------------------------------------------------------------------------------------------------------------------------------------------------------------------------------------------------------------------------------------------------------------------------------------------------------------|--------------|---------------------|-----|--------------|-------|------------|-------------------|--------------------------------------------------------------------------------------------------------------------------------------------------------------------------------------------------|-----------|------------------------------|------------------------------------------------------------------------------------------------------------------------------------------------------------------------------------------------------------------------------------------------------------------------------------------------------------------------|-----------------------------------------------------------------------------------------------------------|
| <p>Dayson 2020 (b) (59)</p> | <p>Uncontrolled before-and-after study, mixed-methods</p> <p>Study length: 18 months</p>                                                                                                                                                                                                                                                                                                                                                                                                                                                                            | <p><b>Inclusion criteria:</b></p> <p>- patients who could benefit from additional socially focused support, including people who are isolated, feeling low or lacking in confidence and those may need support to access other services in their community such as benefits advice, housing, bereavement and mental health services</p> <p><b>Exclusion criteria:-</b></p> <p>Baseline characteristics:</p> <table border="1" data-bbox="480 457 1074 919"> <tr> <td>N</td> <td></td> <td>1984</td> </tr> <tr> <td>Age</td> <td>&lt; 65 years %</td> <td>30</td> </tr> <tr> <td>Gender (n=1329)</td> <td>Female %</td> <td>69</td> </tr> <tr> <td>Ethnicity</td> <td>White British %</td> <td>51</td> </tr> <tr> <td>Living arrangement</td> <td>-</td> <td>-</td> </tr> <tr> <td>Employment status</td> <td>-</td> <td>-</td> </tr> <tr> <td rowspan="2">Other</td> <td>Referral reason anxiety and low mood %</td> <td>53</td> </tr> <tr> <td>Service users with at least one long-term condition %</td> <td>67</td> </tr> </table> <p>Population: General</p> | N |  | 1984 | Age | < 65 years % | 30 | Gender (n=1329) | Female % | 69 | Ethnicity | White British % | 51 | Living arrangement | - | - | Employment status | - | - | Other | Referral reason anxiety and low mood % | 53 | Service users with at least one long-term condition % | 67 | <p>Primary care</p> <p>Country: UK (Bradford, West Yorkshire, England)</p> | <table border="1" data-bbox="1311 226 2231 886"> <tr> <td>Name</td> <td>Community Connectors Social Prescribing Service</td> </tr> <tr> <td>Why</td> <td>Improve the health, well-being and social connectedness of local people, reduce unplanned and unnecessary demand on primary and secondary health services</td> </tr> <tr> <td>What</td> <td>Starts with a referral from a GP or other practice staff or healthcare professionals (including the Virtual Ward at Accident and Emergency) via System One or Care Navigation, followed by a home visit or meeting in a mutually agreed setting with a Community Connector who will work alongside the individual to establish what support is required and what they are interested in<br/><br/>- Community Connector would then help identify what services and activities are available locally that fit those interests and support the individual to access them</td> </tr> <tr> <td>Who provided</td> <td>Community Connector</td> </tr> <tr> <td>How</td> <td>Face-to-face</td> </tr> <tr> <td>Where</td> <td>Home visit</td> </tr> <tr> <td>When and How Much</td> <td>Usually offered for up to six sessions of up to an hour, although in some cases support has been provided over an extended period if it was believed that this would help sustain lasting change</td> </tr> <tr> <td>Tailoring</td> <td>Personalized recommendations</td> </tr> </table> <p>Intervention: Holistic</p> | Name | Community Connectors Social Prescribing Service | Why | Improve the health, well-being and social connectedness of local people, reduce unplanned and unnecessary demand on primary and secondary health services | What | Starts with a referral from a GP or other practice staff or healthcare professionals (including the Virtual Ward at Accident and Emergency) via System One or Care Navigation, followed by a home visit or meeting in a mutually agreed setting with a Community Connector who will work alongside the individual to establish what support is required and what they are interested in<br><br>- Community Connector would then help identify what services and activities are available locally that fit those interests and support the individual to access them | Who provided | Community Connector | How | Face-to-face | Where | Home visit | When and How Much | Usually offered for up to six sessions of up to an hour, although in some cases support has been provided over an extended period if it was believed that this would help sustain lasting change | Tailoring | Personalized recommendations | <p>Patient outcomes at baseline (pre intervention) and endpoint (app. after 3 months) via monitoring data and questionnaire:</p> <ul style="list-style-type: none"> <li>- EQ-VAS</li> <li>- EQ-5D</li> <li>- Short Warwick Edinburgh Mental Well-being Scale (SWEMWBS)</li> <li>- Trust (Likert scale 0-10)</li> </ul> | <p>Peer-Review: no</p> <p>Funding source: Not mentioned</p> <p>Declaration of interest: not mentioned</p> |
| N                           |                                                                                                                                                                                                                                                                                                                                                                                                                                                                                                                                                                     | 1984                                                                                                                                                                                                                                                                                                                                                                                                                                                                                                                                                                                                                                                                                                                                                                                                                                                                                                                                                                                                                                                             |   |  |      |     |              |    |                 |          |    |           |                 |    |                    |   |   |                   |   |   |       |                                        |    |                                                       |    |                                                                            |                                                                                                                                                                                                                                                                                                                                                                                                                                                                                                                                                                                                                                                                                                                                                                                                                                                                                                                                                                                                                                                                                                                                                                                                                                                                                                                                                                                                                                                            |      |                                                 |     |                                                                                                                                                           |      |                                                                                                                                                                                                                                                                                                                                                                                                                                                                                                                                                                     |              |                     |     |              |       |            |                   |                                                                                                                                                                                                  |           |                              |                                                                                                                                                                                                                                                                                                                        |                                                                                                           |
| Age                         | < 65 years %                                                                                                                                                                                                                                                                                                                                                                                                                                                                                                                                                        | 30                                                                                                                                                                                                                                                                                                                                                                                                                                                                                                                                                                                                                                                                                                                                                                                                                                                                                                                                                                                                                                                               |   |  |      |     |              |    |                 |          |    |           |                 |    |                    |   |   |                   |   |   |       |                                        |    |                                                       |    |                                                                            |                                                                                                                                                                                                                                                                                                                                                                                                                                                                                                                                                                                                                                                                                                                                                                                                                                                                                                                                                                                                                                                                                                                                                                                                                                                                                                                                                                                                                                                            |      |                                                 |     |                                                                                                                                                           |      |                                                                                                                                                                                                                                                                                                                                                                                                                                                                                                                                                                     |              |                     |     |              |       |            |                   |                                                                                                                                                                                                  |           |                              |                                                                                                                                                                                                                                                                                                                        |                                                                                                           |
| Gender (n=1329)             | Female %                                                                                                                                                                                                                                                                                                                                                                                                                                                                                                                                                            | 69                                                                                                                                                                                                                                                                                                                                                                                                                                                                                                                                                                                                                                                                                                                                                                                                                                                                                                                                                                                                                                                               |   |  |      |     |              |    |                 |          |    |           |                 |    |                    |   |   |                   |   |   |       |                                        |    |                                                       |    |                                                                            |                                                                                                                                                                                                                                                                                                                                                                                                                                                                                                                                                                                                                                                                                                                                                                                                                                                                                                                                                                                                                                                                                                                                                                                                                                                                                                                                                                                                                                                            |      |                                                 |     |                                                                                                                                                           |      |                                                                                                                                                                                                                                                                                                                                                                                                                                                                                                                                                                     |              |                     |     |              |       |            |                   |                                                                                                                                                                                                  |           |                              |                                                                                                                                                                                                                                                                                                                        |                                                                                                           |
| Ethnicity                   | White British %                                                                                                                                                                                                                                                                                                                                                                                                                                                                                                                                                     | 51                                                                                                                                                                                                                                                                                                                                                                                                                                                                                                                                                                                                                                                                                                                                                                                                                                                                                                                                                                                                                                                               |   |  |      |     |              |    |                 |          |    |           |                 |    |                    |   |   |                   |   |   |       |                                        |    |                                                       |    |                                                                            |                                                                                                                                                                                                                                                                                                                                                                                                                                                                                                                                                                                                                                                                                                                                                                                                                                                                                                                                                                                                                                                                                                                                                                                                                                                                                                                                                                                                                                                            |      |                                                 |     |                                                                                                                                                           |      |                                                                                                                                                                                                                                                                                                                                                                                                                                                                                                                                                                     |              |                     |     |              |       |            |                   |                                                                                                                                                                                                  |           |                              |                                                                                                                                                                                                                                                                                                                        |                                                                                                           |
| Living arrangement          | -                                                                                                                                                                                                                                                                                                                                                                                                                                                                                                                                                                   | -                                                                                                                                                                                                                                                                                                                                                                                                                                                                                                                                                                                                                                                                                                                                                                                                                                                                                                                                                                                                                                                                |   |  |      |     |              |    |                 |          |    |           |                 |    |                    |   |   |                   |   |   |       |                                        |    |                                                       |    |                                                                            |                                                                                                                                                                                                                                                                                                                                                                                                                                                                                                                                                                                                                                                                                                                                                                                                                                                                                                                                                                                                                                                                                                                                                                                                                                                                                                                                                                                                                                                            |      |                                                 |     |                                                                                                                                                           |      |                                                                                                                                                                                                                                                                                                                                                                                                                                                                                                                                                                     |              |                     |     |              |       |            |                   |                                                                                                                                                                                                  |           |                              |                                                                                                                                                                                                                                                                                                                        |                                                                                                           |
| Employment status           | -                                                                                                                                                                                                                                                                                                                                                                                                                                                                                                                                                                   | -                                                                                                                                                                                                                                                                                                                                                                                                                                                                                                                                                                                                                                                                                                                                                                                                                                                                                                                                                                                                                                                                |   |  |      |     |              |    |                 |          |    |           |                 |    |                    |   |   |                   |   |   |       |                                        |    |                                                       |    |                                                                            |                                                                                                                                                                                                                                                                                                                                                                                                                                                                                                                                                                                                                                                                                                                                                                                                                                                                                                                                                                                                                                                                                                                                                                                                                                                                                                                                                                                                                                                            |      |                                                 |     |                                                                                                                                                           |      |                                                                                                                                                                                                                                                                                                                                                                                                                                                                                                                                                                     |              |                     |     |              |       |            |                   |                                                                                                                                                                                                  |           |                              |                                                                                                                                                                                                                                                                                                                        |                                                                                                           |
| Other                       | Referral reason anxiety and low mood %                                                                                                                                                                                                                                                                                                                                                                                                                                                                                                                              | 53                                                                                                                                                                                                                                                                                                                                                                                                                                                                                                                                                                                                                                                                                                                                                                                                                                                                                                                                                                                                                                                               |   |  |      |     |              |    |                 |          |    |           |                 |    |                    |   |   |                   |   |   |       |                                        |    |                                                       |    |                                                                            |                                                                                                                                                                                                                                                                                                                                                                                                                                                                                                                                                                                                                                                                                                                                                                                                                                                                                                                                                                                                                                                                                                                                                                                                                                                                                                                                                                                                                                                            |      |                                                 |     |                                                                                                                                                           |      |                                                                                                                                                                                                                                                                                                                                                                                                                                                                                                                                                                     |              |                     |     |              |       |            |                   |                                                                                                                                                                                                  |           |                              |                                                                                                                                                                                                                                                                                                                        |                                                                                                           |
|                             | Service users with at least one long-term condition %                                                                                                                                                                                                                                                                                                                                                                                                                                                                                                               | 67                                                                                                                                                                                                                                                                                                                                                                                                                                                                                                                                                                                                                                                                                                                                                                                                                                                                                                                                                                                                                                                               |   |  |      |     |              |    |                 |          |    |           |                 |    |                    |   |   |                   |   |   |       |                                        |    |                                                       |    |                                                                            |                                                                                                                                                                                                                                                                                                                                                                                                                                                                                                                                                                                                                                                                                                                                                                                                                                                                                                                                                                                                                                                                                                                                                                                                                                                                                                                                                                                                                                                            |      |                                                 |     |                                                                                                                                                           |      |                                                                                                                                                                                                                                                                                                                                                                                                                                                                                                                                                                     |              |                     |     |              |       |            |                   |                                                                                                                                                                                                  |           |                              |                                                                                                                                                                                                                                                                                                                        |                                                                                                           |
| Name                        | Community Connectors Social Prescribing Service                                                                                                                                                                                                                                                                                                                                                                                                                                                                                                                     |                                                                                                                                                                                                                                                                                                                                                                                                                                                                                                                                                                                                                                                                                                                                                                                                                                                                                                                                                                                                                                                                  |   |  |      |     |              |    |                 |          |    |           |                 |    |                    |   |   |                   |   |   |       |                                        |    |                                                       |    |                                                                            |                                                                                                                                                                                                                                                                                                                                                                                                                                                                                                                                                                                                                                                                                                                                                                                                                                                                                                                                                                                                                                                                                                                                                                                                                                                                                                                                                                                                                                                            |      |                                                 |     |                                                                                                                                                           |      |                                                                                                                                                                                                                                                                                                                                                                                                                                                                                                                                                                     |              |                     |     |              |       |            |                   |                                                                                                                                                                                                  |           |                              |                                                                                                                                                                                                                                                                                                                        |                                                                                                           |
| Why                         | Improve the health, well-being and social connectedness of local people, reduce unplanned and unnecessary demand on primary and secondary health services                                                                                                                                                                                                                                                                                                                                                                                                           |                                                                                                                                                                                                                                                                                                                                                                                                                                                                                                                                                                                                                                                                                                                                                                                                                                                                                                                                                                                                                                                                  |   |  |      |     |              |    |                 |          |    |           |                 |    |                    |   |   |                   |   |   |       |                                        |    |                                                       |    |                                                                            |                                                                                                                                                                                                                                                                                                                                                                                                                                                                                                                                                                                                                                                                                                                                                                                                                                                                                                                                                                                                                                                                                                                                                                                                                                                                                                                                                                                                                                                            |      |                                                 |     |                                                                                                                                                           |      |                                                                                                                                                                                                                                                                                                                                                                                                                                                                                                                                                                     |              |                     |     |              |       |            |                   |                                                                                                                                                                                                  |           |                              |                                                                                                                                                                                                                                                                                                                        |                                                                                                           |
| What                        | Starts with a referral from a GP or other practice staff or healthcare professionals (including the Virtual Ward at Accident and Emergency) via System One or Care Navigation, followed by a home visit or meeting in a mutually agreed setting with a Community Connector who will work alongside the individual to establish what support is required and what they are interested in<br><br>- Community Connector would then help identify what services and activities are available locally that fit those interests and support the individual to access them |                                                                                                                                                                                                                                                                                                                                                                                                                                                                                                                                                                                                                                                                                                                                                                                                                                                                                                                                                                                                                                                                  |   |  |      |     |              |    |                 |          |    |           |                 |    |                    |   |   |                   |   |   |       |                                        |    |                                                       |    |                                                                            |                                                                                                                                                                                                                                                                                                                                                                                                                                                                                                                                                                                                                                                                                                                                                                                                                                                                                                                                                                                                                                                                                                                                                                                                                                                                                                                                                                                                                                                            |      |                                                 |     |                                                                                                                                                           |      |                                                                                                                                                                                                                                                                                                                                                                                                                                                                                                                                                                     |              |                     |     |              |       |            |                   |                                                                                                                                                                                                  |           |                              |                                                                                                                                                                                                                                                                                                                        |                                                                                                           |
| Who provided                | Community Connector                                                                                                                                                                                                                                                                                                                                                                                                                                                                                                                                                 |                                                                                                                                                                                                                                                                                                                                                                                                                                                                                                                                                                                                                                                                                                                                                                                                                                                                                                                                                                                                                                                                  |   |  |      |     |              |    |                 |          |    |           |                 |    |                    |   |   |                   |   |   |       |                                        |    |                                                       |    |                                                                            |                                                                                                                                                                                                                                                                                                                                                                                                                                                                                                                                                                                                                                                                                                                                                                                                                                                                                                                                                                                                                                                                                                                                                                                                                                                                                                                                                                                                                                                            |      |                                                 |     |                                                                                                                                                           |      |                                                                                                                                                                                                                                                                                                                                                                                                                                                                                                                                                                     |              |                     |     |              |       |            |                   |                                                                                                                                                                                                  |           |                              |                                                                                                                                                                                                                                                                                                                        |                                                                                                           |
| How                         | Face-to-face                                                                                                                                                                                                                                                                                                                                                                                                                                                                                                                                                        |                                                                                                                                                                                                                                                                                                                                                                                                                                                                                                                                                                                                                                                                                                                                                                                                                                                                                                                                                                                                                                                                  |   |  |      |     |              |    |                 |          |    |           |                 |    |                    |   |   |                   |   |   |       |                                        |    |                                                       |    |                                                                            |                                                                                                                                                                                                                                                                                                                                                                                                                                                                                                                                                                                                                                                                                                                                                                                                                                                                                                                                                                                                                                                                                                                                                                                                                                                                                                                                                                                                                                                            |      |                                                 |     |                                                                                                                                                           |      |                                                                                                                                                                                                                                                                                                                                                                                                                                                                                                                                                                     |              |                     |     |              |       |            |                   |                                                                                                                                                                                                  |           |                              |                                                                                                                                                                                                                                                                                                                        |                                                                                                           |
| Where                       | Home visit                                                                                                                                                                                                                                                                                                                                                                                                                                                                                                                                                          |                                                                                                                                                                                                                                                                                                                                                                                                                                                                                                                                                                                                                                                                                                                                                                                                                                                                                                                                                                                                                                                                  |   |  |      |     |              |    |                 |          |    |           |                 |    |                    |   |   |                   |   |   |       |                                        |    |                                                       |    |                                                                            |                                                                                                                                                                                                                                                                                                                                                                                                                                                                                                                                                                                                                                                                                                                                                                                                                                                                                                                                                                                                                                                                                                                                                                                                                                                                                                                                                                                                                                                            |      |                                                 |     |                                                                                                                                                           |      |                                                                                                                                                                                                                                                                                                                                                                                                                                                                                                                                                                     |              |                     |     |              |       |            |                   |                                                                                                                                                                                                  |           |                              |                                                                                                                                                                                                                                                                                                                        |                                                                                                           |
| When and How Much           | Usually offered for up to six sessions of up to an hour, although in some cases support has been provided over an extended period if it was believed that this would help sustain lasting change                                                                                                                                                                                                                                                                                                                                                                    |                                                                                                                                                                                                                                                                                                                                                                                                                                                                                                                                                                                                                                                                                                                                                                                                                                                                                                                                                                                                                                                                  |   |  |      |     |              |    |                 |          |    |           |                 |    |                    |   |   |                   |   |   |       |                                        |    |                                                       |    |                                                                            |                                                                                                                                                                                                                                                                                                                                                                                                                                                                                                                                                                                                                                                                                                                                                                                                                                                                                                                                                                                                                                                                                                                                                                                                                                                                                                                                                                                                                                                            |      |                                                 |     |                                                                                                                                                           |      |                                                                                                                                                                                                                                                                                                                                                                                                                                                                                                                                                                     |              |                     |     |              |       |            |                   |                                                                                                                                                                                                  |           |                              |                                                                                                                                                                                                                                                                                                                        |                                                                                                           |
| Tailoring                   | Personalized recommendations                                                                                                                                                                                                                                                                                                                                                                                                                                                                                                                                        |                                                                                                                                                                                                                                                                                                                                                                                                                                                                                                                                                                                                                                                                                                                                                                                                                                                                                                                                                                                                                                                                  |   |  |      |     |              |    |                 |          |    |           |                 |    |                    |   |   |                   |   |   |       |                                        |    |                                                       |    |                                                                            |                                                                                                                                                                                                                                                                                                                                                                                                                                                                                                                                                                                                                                                                                                                                                                                                                                                                                                                                                                                                                                                                                                                                                                                                                                                                                                                                                                                                                                                            |      |                                                 |     |                                                                                                                                                           |      |                                                                                                                                                                                                                                                                                                                                                                                                                                                                                                                                                                     |              |                     |     |              |       |            |                   |                                                                                                                                                                                                  |           |                              |                                                                                                                                                                                                                                                                                                                        |                                                                                                           |

|                         |                                                                                                                                                                                                                                                                                                                                                                                                                                                                                                                                                                                                                                                                      |                                                                                                                                                                                                                                                                                                                                                                                                                                                                                                                                                                                                                                                                                                                                                                                                                |   |  |      |     |              |      |               |          |      |           |                 |    |                    |   |   |                   |   |   |       |   |   |                                                                                                                         |                                                                                                                                                                                                                                                                                                                                                                                                                                                                                                                                                                                                                                                                                                                                                                                                                                                                                                                                                                                                                                                                                                                                                                                                                                                                                                                                                                                                                                                                                                                                                                                                                                                                                                                                                                                                                                                                                                                                                                                                                                                                                                                                                                                                                                                                                                                                                                                                                            |      |                                           |     |                                                                                                                                                                                                                                                                                                                                                                                                                   |      |                                                                                                                                                                                                                                                                  |              |                                                                                                                                                                                                                                                                                                                                                                                                                                                                                                                                                                                                                            |                                                                                                                                                                                              |                                                                                                                                                                                                                                                                                                                                                                                                                                                                                                                                                                                                                                                                      |       |                                                                       |                   |                |           |              |                                                                                                                                                                                                                                                                                                                                                                                                                                                                                                                                                                                                                                                                                                                                                                                                                                                                                                                                                                                                                                                              |                                                                                                                                                                                                                                                                                                                                                                                                                                                                                                                                                                                                                    |
|-------------------------|----------------------------------------------------------------------------------------------------------------------------------------------------------------------------------------------------------------------------------------------------------------------------------------------------------------------------------------------------------------------------------------------------------------------------------------------------------------------------------------------------------------------------------------------------------------------------------------------------------------------------------------------------------------------|----------------------------------------------------------------------------------------------------------------------------------------------------------------------------------------------------------------------------------------------------------------------------------------------------------------------------------------------------------------------------------------------------------------------------------------------------------------------------------------------------------------------------------------------------------------------------------------------------------------------------------------------------------------------------------------------------------------------------------------------------------------------------------------------------------------|---|--|------|-----|--------------|------|---------------|----------|------|-----------|-----------------|----|--------------------|---|---|-------------------|---|---|-------|---|---|-------------------------------------------------------------------------------------------------------------------------|----------------------------------------------------------------------------------------------------------------------------------------------------------------------------------------------------------------------------------------------------------------------------------------------------------------------------------------------------------------------------------------------------------------------------------------------------------------------------------------------------------------------------------------------------------------------------------------------------------------------------------------------------------------------------------------------------------------------------------------------------------------------------------------------------------------------------------------------------------------------------------------------------------------------------------------------------------------------------------------------------------------------------------------------------------------------------------------------------------------------------------------------------------------------------------------------------------------------------------------------------------------------------------------------------------------------------------------------------------------------------------------------------------------------------------------------------------------------------------------------------------------------------------------------------------------------------------------------------------------------------------------------------------------------------------------------------------------------------------------------------------------------------------------------------------------------------------------------------------------------------------------------------------------------------------------------------------------------------------------------------------------------------------------------------------------------------------------------------------------------------------------------------------------------------------------------------------------------------------------------------------------------------------------------------------------------------------------------------------------------------------------------------------------------------|------|-------------------------------------------|-----|-------------------------------------------------------------------------------------------------------------------------------------------------------------------------------------------------------------------------------------------------------------------------------------------------------------------------------------------------------------------------------------------------------------------|------|------------------------------------------------------------------------------------------------------------------------------------------------------------------------------------------------------------------------------------------------------------------|--------------|----------------------------------------------------------------------------------------------------------------------------------------------------------------------------------------------------------------------------------------------------------------------------------------------------------------------------------------------------------------------------------------------------------------------------------------------------------------------------------------------------------------------------------------------------------------------------------------------------------------------------|----------------------------------------------------------------------------------------------------------------------------------------------------------------------------------------------|----------------------------------------------------------------------------------------------------------------------------------------------------------------------------------------------------------------------------------------------------------------------------------------------------------------------------------------------------------------------------------------------------------------------------------------------------------------------------------------------------------------------------------------------------------------------------------------------------------------------------------------------------------------------|-------|-----------------------------------------------------------------------|-------------------|----------------|-----------|--------------|--------------------------------------------------------------------------------------------------------------------------------------------------------------------------------------------------------------------------------------------------------------------------------------------------------------------------------------------------------------------------------------------------------------------------------------------------------------------------------------------------------------------------------------------------------------------------------------------------------------------------------------------------------------------------------------------------------------------------------------------------------------------------------------------------------------------------------------------------------------------------------------------------------------------------------------------------------------------------------------------------------------------------------------------------------------|--------------------------------------------------------------------------------------------------------------------------------------------------------------------------------------------------------------------------------------------------------------------------------------------------------------------------------------------------------------------------------------------------------------------------------------------------------------------------------------------------------------------------------------------------------------------------------------------------------------------|
| <p>Elston 2019 (60)</p> | <p>Uncontrolled before-and-after study</p> <p>Study length: 12 months</p>                                                                                                                                                                                                                                                                                                                                                                                                                                                                                                                                                                                            | <p><b>Inclusion criteria:</b></p> <ul style="list-style-type: none"> <li>- aged 50 years or over</li> <li>- two or more long-term conditions</li> <li>- considered as likely to benefit from a social intervention</li> </ul> <p><b>Exclusion criteria:</b> -</p> <p>Baseline characteristics:</p> <table border="1" data-bbox="477 407 1071 730"> <tr> <td>N</td> <td></td> <td>1046</td> </tr> <tr> <td>Age</td> <td>Mean</td> <td>79.6</td> </tr> <tr> <td>Gender (n=86)</td> <td>Female %</td> <td>73.3</td> </tr> <tr> <td>Ethnicity</td> <td>-</td> <td>-</td> </tr> <tr> <td>Living arrangement</td> <td>-</td> <td>-</td> </tr> <tr> <td>Employment status</td> <td>-</td> <td>-</td> </tr> <tr> <td>other</td> <td>-</td> <td>-</td> </tr> </table> <p>Population: Special (long-term conditions)</p> | N |  | 1046 | Age | Mean         | 79.6 | Gender (n=86) | Female % | 73.3 | Ethnicity | -               | -  | Living arrangement | - | - | Employment status | - | - | other | - | - | <p>Primary care setting, community care, secondary care</p> <p>Country: UK (South Devon, Devon, South West England)</p> | <table border="1" data-bbox="1308 226 2228 1268"> <tr> <td>Name</td> <td>social prescribing 'holistic' link-worker</td> </tr> <tr> <td>Why</td> <td> <p>Improve health and social wellbeing, patient activation and frailty levels, and that this would lead to less use of primary, social and acute care services and reduced costs</p> <p>- secondary objective was to explore what patient characteristics on programme entry were associated with positive outcomes</p> </td> </tr> <tr> <td>What</td> <td> <p>Initial 30–40 min strengths-based, guided conversation with all referrals, mostly in their homes (80%), to determine need and decide whether signposting, a short conversation or a more in-depth 'holistic' conversation is required</p> </td> </tr> <tr> <td>Who provided</td> <td> <p>Co-ordinators employed by 7 key voluntary sector organisations, embedded in local communities across the area</p> <p>- Co-ordinators are based in a variety of settings, including NHS premises</p> <p>- all Co-ordinators are non-health care staff (although some previously worked in the health service) and all received training in goal setting, use of tools and outcome measures, and in how to engage with users in a strengths-based way, co-produce a plan and manage risk</p> <p>- key aspects of the role included: listening skills, emotional support, advice and practical assistance and coaching</p> </td> </tr> <tr> <td>How</td> <td> <p>Referrals were received mainly from statutory services – GPs, community and social care staff in multidisciplinary meetings, hospital discharge staff (acute and community) and housing staff – as well as local voluntary and community organisations</p> <p>- Co-ordinators hold an initial 30–40 min strengths-based, guided conversation with all referrals, mostly in their homes (80%), to determine need and decide whether signposting, a short conversation or a more in-depth 'holistic' conversation is required, resilience-focused coaching and practical support and advocacy to navigate and access local health, social and economic services</p> </td> </tr> <tr> <td>Where</td> <td>In a setting preferred by the person, mostly participants homes (80%)</td> </tr> <tr> <td>When and How Much</td> <td>Up to 12 weeks</td> </tr> <tr> <td>Tailoring</td> <td>Personalized</td> </tr> </table> <p>Intervention: Holistic</p> | Name | social prescribing 'holistic' link-worker | Why | <p>Improve health and social wellbeing, patient activation and frailty levels, and that this would lead to less use of primary, social and acute care services and reduced costs</p> <p>- secondary objective was to explore what patient characteristics on programme entry were associated with positive outcomes</p>                                                                                           | What | <p>Initial 30–40 min strengths-based, guided conversation with all referrals, mostly in their homes (80%), to determine need and decide whether signposting, a short conversation or a more in-depth 'holistic' conversation is required</p>                     | Who provided | <p>Co-ordinators employed by 7 key voluntary sector organisations, embedded in local communities across the area</p> <p>- Co-ordinators are based in a variety of settings, including NHS premises</p> <p>- all Co-ordinators are non-health care staff (although some previously worked in the health service) and all received training in goal setting, use of tools and outcome measures, and in how to engage with users in a strengths-based way, co-produce a plan and manage risk</p> <p>- key aspects of the role included: listening skills, emotional support, advice and practical assistance and coaching</p> | How                                                                                                                                                                                          | <p>Referrals were received mainly from statutory services – GPs, community and social care staff in multidisciplinary meetings, hospital discharge staff (acute and community) and housing staff – as well as local voluntary and community organisations</p> <p>- Co-ordinators hold an initial 30–40 min strengths-based, guided conversation with all referrals, mostly in their homes (80%), to determine need and decide whether signposting, a short conversation or a more in-depth 'holistic' conversation is required, resilience-focused coaching and practical support and advocacy to navigate and access local health, social and economic services</p> | Where | In a setting preferred by the person, mostly participants homes (80%) | When and How Much | Up to 12 weeks | Tailoring | Personalized | <p>Patient outcomes at baseline (collected at either the first or second meeting with the Co-ordinator) and 12-weeks follow-up or point of exit:</p> <ul style="list-style-type: none"> <li>- Warwick Edinburgh Mental Well-being Scale (WEMWBS)</li> <li>- Well-being Star</li> <li>- Patient Activation Measure (PAM)</li> <li>- Rockwood Clinical Frailty Scale (RCFS)</li> <li>- goal achievement</li> </ul> <p>Process of care measures 12 months before and 12 months after intervention (from local IT systems):</p> <ul style="list-style-type: none"> <li>- A&amp;E visits and average costs</li> <li>- in-patient visits and average costs</li> <li>- outpatient visits</li> <li>- community visits</li> <li>- social care visits</li> <li>- health costs</li> <li>- social care costs</li> <li>- total costs</li> </ul> <p>(cost analysis was based on health and community service attendance 12 months before and after the intervention, it used the Trust's attendance costs submitted to the National Tariff Payment System for 2016–17)</p> | <p>Peer-Review: yes</p> <p>Funding source: Torbay Medical Research Fund and Torbay and South Devon NHS Foundation Trust (TSDFT): TMRF project number 120</p> <p>Declaration of interest: This evaluation was supported by Torbay Medical Research Fund and Torbay and South Devon NHS Foundation Trust (TSDFT). TSDFT also commissioned the SP service (managed by Sue Wroe and Helen Harman) and part-funded the Researchers-in-Residence (Julian Elston and Felix Grading) with Torbay Medical Research Fund (TMRF project number 120). Julian Elston and Felix Grading are employed by Plymouth University.</p> |
| N                       |                                                                                                                                                                                                                                                                                                                                                                                                                                                                                                                                                                                                                                                                      | 1046                                                                                                                                                                                                                                                                                                                                                                                                                                                                                                                                                                                                                                                                                                                                                                                                           |   |  |      |     |              |      |               |          |      |           |                 |    |                    |   |   |                   |   |   |       |   |   |                                                                                                                         |                                                                                                                                                                                                                                                                                                                                                                                                                                                                                                                                                                                                                                                                                                                                                                                                                                                                                                                                                                                                                                                                                                                                                                                                                                                                                                                                                                                                                                                                                                                                                                                                                                                                                                                                                                                                                                                                                                                                                                                                                                                                                                                                                                                                                                                                                                                                                                                                                            |      |                                           |     |                                                                                                                                                                                                                                                                                                                                                                                                                   |      |                                                                                                                                                                                                                                                                  |              |                                                                                                                                                                                                                                                                                                                                                                                                                                                                                                                                                                                                                            |                                                                                                                                                                                              |                                                                                                                                                                                                                                                                                                                                                                                                                                                                                                                                                                                                                                                                      |       |                                                                       |                   |                |           |              |                                                                                                                                                                                                                                                                                                                                                                                                                                                                                                                                                                                                                                                                                                                                                                                                                                                                                                                                                                                                                                                              |                                                                                                                                                                                                                                                                                                                                                                                                                                                                                                                                                                                                                    |
| Age                     | Mean                                                                                                                                                                                                                                                                                                                                                                                                                                                                                                                                                                                                                                                                 | 79.6                                                                                                                                                                                                                                                                                                                                                                                                                                                                                                                                                                                                                                                                                                                                                                                                           |   |  |      |     |              |      |               |          |      |           |                 |    |                    |   |   |                   |   |   |       |   |   |                                                                                                                         |                                                                                                                                                                                                                                                                                                                                                                                                                                                                                                                                                                                                                                                                                                                                                                                                                                                                                                                                                                                                                                                                                                                                                                                                                                                                                                                                                                                                                                                                                                                                                                                                                                                                                                                                                                                                                                                                                                                                                                                                                                                                                                                                                                                                                                                                                                                                                                                                                            |      |                                           |     |                                                                                                                                                                                                                                                                                                                                                                                                                   |      |                                                                                                                                                                                                                                                                  |              |                                                                                                                                                                                                                                                                                                                                                                                                                                                                                                                                                                                                                            |                                                                                                                                                                                              |                                                                                                                                                                                                                                                                                                                                                                                                                                                                                                                                                                                                                                                                      |       |                                                                       |                   |                |           |              |                                                                                                                                                                                                                                                                                                                                                                                                                                                                                                                                                                                                                                                                                                                                                                                                                                                                                                                                                                                                                                                              |                                                                                                                                                                                                                                                                                                                                                                                                                                                                                                                                                                                                                    |
| Gender (n=86)           | Female %                                                                                                                                                                                                                                                                                                                                                                                                                                                                                                                                                                                                                                                             | 73.3                                                                                                                                                                                                                                                                                                                                                                                                                                                                                                                                                                                                                                                                                                                                                                                                           |   |  |      |     |              |      |               |          |      |           |                 |    |                    |   |   |                   |   |   |       |   |   |                                                                                                                         |                                                                                                                                                                                                                                                                                                                                                                                                                                                                                                                                                                                                                                                                                                                                                                                                                                                                                                                                                                                                                                                                                                                                                                                                                                                                                                                                                                                                                                                                                                                                                                                                                                                                                                                                                                                                                                                                                                                                                                                                                                                                                                                                                                                                                                                                                                                                                                                                                            |      |                                           |     |                                                                                                                                                                                                                                                                                                                                                                                                                   |      |                                                                                                                                                                                                                                                                  |              |                                                                                                                                                                                                                                                                                                                                                                                                                                                                                                                                                                                                                            |                                                                                                                                                                                              |                                                                                                                                                                                                                                                                                                                                                                                                                                                                                                                                                                                                                                                                      |       |                                                                       |                   |                |           |              |                                                                                                                                                                                                                                                                                                                                                                                                                                                                                                                                                                                                                                                                                                                                                                                                                                                                                                                                                                                                                                                              |                                                                                                                                                                                                                                                                                                                                                                                                                                                                                                                                                                                                                    |
| Ethnicity               | -                                                                                                                                                                                                                                                                                                                                                                                                                                                                                                                                                                                                                                                                    | -                                                                                                                                                                                                                                                                                                                                                                                                                                                                                                                                                                                                                                                                                                                                                                                                              |   |  |      |     |              |      |               |          |      |           |                 |    |                    |   |   |                   |   |   |       |   |   |                                                                                                                         |                                                                                                                                                                                                                                                                                                                                                                                                                                                                                                                                                                                                                                                                                                                                                                                                                                                                                                                                                                                                                                                                                                                                                                                                                                                                                                                                                                                                                                                                                                                                                                                                                                                                                                                                                                                                                                                                                                                                                                                                                                                                                                                                                                                                                                                                                                                                                                                                                            |      |                                           |     |                                                                                                                                                                                                                                                                                                                                                                                                                   |      |                                                                                                                                                                                                                                                                  |              |                                                                                                                                                                                                                                                                                                                                                                                                                                                                                                                                                                                                                            |                                                                                                                                                                                              |                                                                                                                                                                                                                                                                                                                                                                                                                                                                                                                                                                                                                                                                      |       |                                                                       |                   |                |           |              |                                                                                                                                                                                                                                                                                                                                                                                                                                                                                                                                                                                                                                                                                                                                                                                                                                                                                                                                                                                                                                                              |                                                                                                                                                                                                                                                                                                                                                                                                                                                                                                                                                                                                                    |
| Living arrangement      | -                                                                                                                                                                                                                                                                                                                                                                                                                                                                                                                                                                                                                                                                    | -                                                                                                                                                                                                                                                                                                                                                                                                                                                                                                                                                                                                                                                                                                                                                                                                              |   |  |      |     |              |      |               |          |      |           |                 |    |                    |   |   |                   |   |   |       |   |   |                                                                                                                         |                                                                                                                                                                                                                                                                                                                                                                                                                                                                                                                                                                                                                                                                                                                                                                                                                                                                                                                                                                                                                                                                                                                                                                                                                                                                                                                                                                                                                                                                                                                                                                                                                                                                                                                                                                                                                                                                                                                                                                                                                                                                                                                                                                                                                                                                                                                                                                                                                            |      |                                           |     |                                                                                                                                                                                                                                                                                                                                                                                                                   |      |                                                                                                                                                                                                                                                                  |              |                                                                                                                                                                                                                                                                                                                                                                                                                                                                                                                                                                                                                            |                                                                                                                                                                                              |                                                                                                                                                                                                                                                                                                                                                                                                                                                                                                                                                                                                                                                                      |       |                                                                       |                   |                |           |              |                                                                                                                                                                                                                                                                                                                                                                                                                                                                                                                                                                                                                                                                                                                                                                                                                                                                                                                                                                                                                                                              |                                                                                                                                                                                                                                                                                                                                                                                                                                                                                                                                                                                                                    |
| Employment status       | -                                                                                                                                                                                                                                                                                                                                                                                                                                                                                                                                                                                                                                                                    | -                                                                                                                                                                                                                                                                                                                                                                                                                                                                                                                                                                                                                                                                                                                                                                                                              |   |  |      |     |              |      |               |          |      |           |                 |    |                    |   |   |                   |   |   |       |   |   |                                                                                                                         |                                                                                                                                                                                                                                                                                                                                                                                                                                                                                                                                                                                                                                                                                                                                                                                                                                                                                                                                                                                                                                                                                                                                                                                                                                                                                                                                                                                                                                                                                                                                                                                                                                                                                                                                                                                                                                                                                                                                                                                                                                                                                                                                                                                                                                                                                                                                                                                                                            |      |                                           |     |                                                                                                                                                                                                                                                                                                                                                                                                                   |      |                                                                                                                                                                                                                                                                  |              |                                                                                                                                                                                                                                                                                                                                                                                                                                                                                                                                                                                                                            |                                                                                                                                                                                              |                                                                                                                                                                                                                                                                                                                                                                                                                                                                                                                                                                                                                                                                      |       |                                                                       |                   |                |           |              |                                                                                                                                                                                                                                                                                                                                                                                                                                                                                                                                                                                                                                                                                                                                                                                                                                                                                                                                                                                                                                                              |                                                                                                                                                                                                                                                                                                                                                                                                                                                                                                                                                                                                                    |
| other                   | -                                                                                                                                                                                                                                                                                                                                                                                                                                                                                                                                                                                                                                                                    | -                                                                                                                                                                                                                                                                                                                                                                                                                                                                                                                                                                                                                                                                                                                                                                                                              |   |  |      |     |              |      |               |          |      |           |                 |    |                    |   |   |                   |   |   |       |   |   |                                                                                                                         |                                                                                                                                                                                                                                                                                                                                                                                                                                                                                                                                                                                                                                                                                                                                                                                                                                                                                                                                                                                                                                                                                                                                                                                                                                                                                                                                                                                                                                                                                                                                                                                                                                                                                                                                                                                                                                                                                                                                                                                                                                                                                                                                                                                                                                                                                                                                                                                                                            |      |                                           |     |                                                                                                                                                                                                                                                                                                                                                                                                                   |      |                                                                                                                                                                                                                                                                  |              |                                                                                                                                                                                                                                                                                                                                                                                                                                                                                                                                                                                                                            |                                                                                                                                                                                              |                                                                                                                                                                                                                                                                                                                                                                                                                                                                                                                                                                                                                                                                      |       |                                                                       |                   |                |           |              |                                                                                                                                                                                                                                                                                                                                                                                                                                                                                                                                                                                                                                                                                                                                                                                                                                                                                                                                                                                                                                                              |                                                                                                                                                                                                                                                                                                                                                                                                                                                                                                                                                                                                                    |
| Name                    | social prescribing 'holistic' link-worker                                                                                                                                                                                                                                                                                                                                                                                                                                                                                                                                                                                                                            |                                                                                                                                                                                                                                                                                                                                                                                                                                                                                                                                                                                                                                                                                                                                                                                                                |   |  |      |     |              |      |               |          |      |           |                 |    |                    |   |   |                   |   |   |       |   |   |                                                                                                                         |                                                                                                                                                                                                                                                                                                                                                                                                                                                                                                                                                                                                                                                                                                                                                                                                                                                                                                                                                                                                                                                                                                                                                                                                                                                                                                                                                                                                                                                                                                                                                                                                                                                                                                                                                                                                                                                                                                                                                                                                                                                                                                                                                                                                                                                                                                                                                                                                                            |      |                                           |     |                                                                                                                                                                                                                                                                                                                                                                                                                   |      |                                                                                                                                                                                                                                                                  |              |                                                                                                                                                                                                                                                                                                                                                                                                                                                                                                                                                                                                                            |                                                                                                                                                                                              |                                                                                                                                                                                                                                                                                                                                                                                                                                                                                                                                                                                                                                                                      |       |                                                                       |                   |                |           |              |                                                                                                                                                                                                                                                                                                                                                                                                                                                                                                                                                                                                                                                                                                                                                                                                                                                                                                                                                                                                                                                              |                                                                                                                                                                                                                                                                                                                                                                                                                                                                                                                                                                                                                    |
| Why                     | <p>Improve health and social wellbeing, patient activation and frailty levels, and that this would lead to less use of primary, social and acute care services and reduced costs</p> <p>- secondary objective was to explore what patient characteristics on programme entry were associated with positive outcomes</p>                                                                                                                                                                                                                                                                                                                                              |                                                                                                                                                                                                                                                                                                                                                                                                                                                                                                                                                                                                                                                                                                                                                                                                                |   |  |      |     |              |      |               |          |      |           |                 |    |                    |   |   |                   |   |   |       |   |   |                                                                                                                         |                                                                                                                                                                                                                                                                                                                                                                                                                                                                                                                                                                                                                                                                                                                                                                                                                                                                                                                                                                                                                                                                                                                                                                                                                                                                                                                                                                                                                                                                                                                                                                                                                                                                                                                                                                                                                                                                                                                                                                                                                                                                                                                                                                                                                                                                                                                                                                                                                            |      |                                           |     |                                                                                                                                                                                                                                                                                                                                                                                                                   |      |                                                                                                                                                                                                                                                                  |              |                                                                                                                                                                                                                                                                                                                                                                                                                                                                                                                                                                                                                            |                                                                                                                                                                                              |                                                                                                                                                                                                                                                                                                                                                                                                                                                                                                                                                                                                                                                                      |       |                                                                       |                   |                |           |              |                                                                                                                                                                                                                                                                                                                                                                                                                                                                                                                                                                                                                                                                                                                                                                                                                                                                                                                                                                                                                                                              |                                                                                                                                                                                                                                                                                                                                                                                                                                                                                                                                                                                                                    |
| What                    | <p>Initial 30–40 min strengths-based, guided conversation with all referrals, mostly in their homes (80%), to determine need and decide whether signposting, a short conversation or a more in-depth 'holistic' conversation is required</p>                                                                                                                                                                                                                                                                                                                                                                                                                         |                                                                                                                                                                                                                                                                                                                                                                                                                                                                                                                                                                                                                                                                                                                                                                                                                |   |  |      |     |              |      |               |          |      |           |                 |    |                    |   |   |                   |   |   |       |   |   |                                                                                                                         |                                                                                                                                                                                                                                                                                                                                                                                                                                                                                                                                                                                                                                                                                                                                                                                                                                                                                                                                                                                                                                                                                                                                                                                                                                                                                                                                                                                                                                                                                                                                                                                                                                                                                                                                                                                                                                                                                                                                                                                                                                                                                                                                                                                                                                                                                                                                                                                                                            |      |                                           |     |                                                                                                                                                                                                                                                                                                                                                                                                                   |      |                                                                                                                                                                                                                                                                  |              |                                                                                                                                                                                                                                                                                                                                                                                                                                                                                                                                                                                                                            |                                                                                                                                                                                              |                                                                                                                                                                                                                                                                                                                                                                                                                                                                                                                                                                                                                                                                      |       |                                                                       |                   |                |           |              |                                                                                                                                                                                                                                                                                                                                                                                                                                                                                                                                                                                                                                                                                                                                                                                                                                                                                                                                                                                                                                                              |                                                                                                                                                                                                                                                                                                                                                                                                                                                                                                                                                                                                                    |
| Who provided            | <p>Co-ordinators employed by 7 key voluntary sector organisations, embedded in local communities across the area</p> <p>- Co-ordinators are based in a variety of settings, including NHS premises</p> <p>- all Co-ordinators are non-health care staff (although some previously worked in the health service) and all received training in goal setting, use of tools and outcome measures, and in how to engage with users in a strengths-based way, co-produce a plan and manage risk</p> <p>- key aspects of the role included: listening skills, emotional support, advice and practical assistance and coaching</p>                                           |                                                                                                                                                                                                                                                                                                                                                                                                                                                                                                                                                                                                                                                                                                                                                                                                                |   |  |      |     |              |      |               |          |      |           |                 |    |                    |   |   |                   |   |   |       |   |   |                                                                                                                         |                                                                                                                                                                                                                                                                                                                                                                                                                                                                                                                                                                                                                                                                                                                                                                                                                                                                                                                                                                                                                                                                                                                                                                                                                                                                                                                                                                                                                                                                                                                                                                                                                                                                                                                                                                                                                                                                                                                                                                                                                                                                                                                                                                                                                                                                                                                                                                                                                            |      |                                           |     |                                                                                                                                                                                                                                                                                                                                                                                                                   |      |                                                                                                                                                                                                                                                                  |              |                                                                                                                                                                                                                                                                                                                                                                                                                                                                                                                                                                                                                            |                                                                                                                                                                                              |                                                                                                                                                                                                                                                                                                                                                                                                                                                                                                                                                                                                                                                                      |       |                                                                       |                   |                |           |              |                                                                                                                                                                                                                                                                                                                                                                                                                                                                                                                                                                                                                                                                                                                                                                                                                                                                                                                                                                                                                                                              |                                                                                                                                                                                                                                                                                                                                                                                                                                                                                                                                                                                                                    |
| How                     | <p>Referrals were received mainly from statutory services – GPs, community and social care staff in multidisciplinary meetings, hospital discharge staff (acute and community) and housing staff – as well as local voluntary and community organisations</p> <p>- Co-ordinators hold an initial 30–40 min strengths-based, guided conversation with all referrals, mostly in their homes (80%), to determine need and decide whether signposting, a short conversation or a more in-depth 'holistic' conversation is required, resilience-focused coaching and practical support and advocacy to navigate and access local health, social and economic services</p> |                                                                                                                                                                                                                                                                                                                                                                                                                                                                                                                                                                                                                                                                                                                                                                                                                |   |  |      |     |              |      |               |          |      |           |                 |    |                    |   |   |                   |   |   |       |   |   |                                                                                                                         |                                                                                                                                                                                                                                                                                                                                                                                                                                                                                                                                                                                                                                                                                                                                                                                                                                                                                                                                                                                                                                                                                                                                                                                                                                                                                                                                                                                                                                                                                                                                                                                                                                                                                                                                                                                                                                                                                                                                                                                                                                                                                                                                                                                                                                                                                                                                                                                                                            |      |                                           |     |                                                                                                                                                                                                                                                                                                                                                                                                                   |      |                                                                                                                                                                                                                                                                  |              |                                                                                                                                                                                                                                                                                                                                                                                                                                                                                                                                                                                                                            |                                                                                                                                                                                              |                                                                                                                                                                                                                                                                                                                                                                                                                                                                                                                                                                                                                                                                      |       |                                                                       |                   |                |           |              |                                                                                                                                                                                                                                                                                                                                                                                                                                                                                                                                                                                                                                                                                                                                                                                                                                                                                                                                                                                                                                                              |                                                                                                                                                                                                                                                                                                                                                                                                                                                                                                                                                                                                                    |
| Where                   | In a setting preferred by the person, mostly participants homes (80%)                                                                                                                                                                                                                                                                                                                                                                                                                                                                                                                                                                                                |                                                                                                                                                                                                                                                                                                                                                                                                                                                                                                                                                                                                                                                                                                                                                                                                                |   |  |      |     |              |      |               |          |      |           |                 |    |                    |   |   |                   |   |   |       |   |   |                                                                                                                         |                                                                                                                                                                                                                                                                                                                                                                                                                                                                                                                                                                                                                                                                                                                                                                                                                                                                                                                                                                                                                                                                                                                                                                                                                                                                                                                                                                                                                                                                                                                                                                                                                                                                                                                                                                                                                                                                                                                                                                                                                                                                                                                                                                                                                                                                                                                                                                                                                            |      |                                           |     |                                                                                                                                                                                                                                                                                                                                                                                                                   |      |                                                                                                                                                                                                                                                                  |              |                                                                                                                                                                                                                                                                                                                                                                                                                                                                                                                                                                                                                            |                                                                                                                                                                                              |                                                                                                                                                                                                                                                                                                                                                                                                                                                                                                                                                                                                                                                                      |       |                                                                       |                   |                |           |              |                                                                                                                                                                                                                                                                                                                                                                                                                                                                                                                                                                                                                                                                                                                                                                                                                                                                                                                                                                                                                                                              |                                                                                                                                                                                                                                                                                                                                                                                                                                                                                                                                                                                                                    |
| When and How Much       | Up to 12 weeks                                                                                                                                                                                                                                                                                                                                                                                                                                                                                                                                                                                                                                                       |                                                                                                                                                                                                                                                                                                                                                                                                                                                                                                                                                                                                                                                                                                                                                                                                                |   |  |      |     |              |      |               |          |      |           |                 |    |                    |   |   |                   |   |   |       |   |   |                                                                                                                         |                                                                                                                                                                                                                                                                                                                                                                                                                                                                                                                                                                                                                                                                                                                                                                                                                                                                                                                                                                                                                                                                                                                                                                                                                                                                                                                                                                                                                                                                                                                                                                                                                                                                                                                                                                                                                                                                                                                                                                                                                                                                                                                                                                                                                                                                                                                                                                                                                            |      |                                           |     |                                                                                                                                                                                                                                                                                                                                                                                                                   |      |                                                                                                                                                                                                                                                                  |              |                                                                                                                                                                                                                                                                                                                                                                                                                                                                                                                                                                                                                            |                                                                                                                                                                                              |                                                                                                                                                                                                                                                                                                                                                                                                                                                                                                                                                                                                                                                                      |       |                                                                       |                   |                |           |              |                                                                                                                                                                                                                                                                                                                                                                                                                                                                                                                                                                                                                                                                                                                                                                                                                                                                                                                                                                                                                                                              |                                                                                                                                                                                                                                                                                                                                                                                                                                                                                                                                                                                                                    |
| Tailoring               | Personalized                                                                                                                                                                                                                                                                                                                                                                                                                                                                                                                                                                                                                                                         |                                                                                                                                                                                                                                                                                                                                                                                                                                                                                                                                                                                                                                                                                                                                                                                                                |   |  |      |     |              |      |               |          |      |           |                 |    |                    |   |   |                   |   |   |       |   |   |                                                                                                                         |                                                                                                                                                                                                                                                                                                                                                                                                                                                                                                                                                                                                                                                                                                                                                                                                                                                                                                                                                                                                                                                                                                                                                                                                                                                                                                                                                                                                                                                                                                                                                                                                                                                                                                                                                                                                                                                                                                                                                                                                                                                                                                                                                                                                                                                                                                                                                                                                                            |      |                                           |     |                                                                                                                                                                                                                                                                                                                                                                                                                   |      |                                                                                                                                                                                                                                                                  |              |                                                                                                                                                                                                                                                                                                                                                                                                                                                                                                                                                                                                                            |                                                                                                                                                                                              |                                                                                                                                                                                                                                                                                                                                                                                                                                                                                                                                                                                                                                                                      |       |                                                                       |                   |                |           |              |                                                                                                                                                                                                                                                                                                                                                                                                                                                                                                                                                                                                                                                                                                                                                                                                                                                                                                                                                                                                                                                              |                                                                                                                                                                                                                                                                                                                                                                                                                                                                                                                                                                                                                    |
| <p>ERS 2013 (61)</p>    | <p>Uncontrolled before-and-after study, mixed-methods</p> <p>Study length: 15 months</p>                                                                                                                                                                                                                                                                                                                                                                                                                                                                                                                                                                             | <p><b>Inclusion criteria:</b> people with long-term conditions</p> <p><b>Exclusion criteria:</b> -</p> <p>Baseline characteristics:</p> <table border="1" data-bbox="477 1465 1071 1835"> <tr> <td>N</td> <td></td> <td>124</td> </tr> <tr> <td>Age</td> <td>&lt; 61 years %</td> <td>71</td> </tr> <tr> <td>Gender</td> <td>Female %</td> <td>70</td> </tr> <tr> <td>Ethnicity</td> <td>White British %</td> <td>76</td> </tr> <tr> <td>Living arrangement</td> <td>-</td> <td>-</td> </tr> <tr> <td>Employment status</td> <td>-</td> <td>-</td> </tr> <tr> <td>other</td> <td>-</td> <td>-</td> </tr> </table>                                                                                                                                                                                              | N |  | 124  | Age | < 61 years % | 71   | Gender        | Female % | 70   | Ethnicity | White British % | 76 | Living arrangement | - | - | Employment status | - | - | other | - | - | <p>Primary care</p> <p>Country: UK (Newcastle upon Tyne, Northern England)</p>                                          | <table border="1" data-bbox="1308 1369 2228 1906"> <tr> <td>Name</td> <td>Newcastle Social Prescribing Project</td> </tr> <tr> <td>Why</td> <td> <p>Enable health professionals to refer (vulnerable) people with Long Term Conditions to non-clinical community services and networks</p> <p>- raise awareness and equip health professionals to be able to use the service through roll out of care planning training and support to all local practices</p> <p>- develop and maintain a comprehensive web-based information resource to support the project</p> </td> </tr> <tr> <td>What</td> <td> <p>The linkworker role was to support patients referred with:</p> <p>- personalised goal setting and buddying</p> <p>- selfcare so that people can self-care/self- manage their condition</p> <p>- signposting to sources of information, advice and support</p> </td> </tr> <tr> <td>Who provided</td> <td> <p>Strategic Link worker, project Coordinator, project Manager</p> <p>In addition other voluntary and community sector organisations and networks were involved in the project. The Quality of Life Partnership, HAREF and Involve North East supported the engagement of local people in the project.</p> </td> </tr> </table>                                                                                                                                                                                                                                                                                                                                                                                                                                                                                                                                                                                                                                                                                                                                                                                                                                                                                                                                                                                                                                                                                                                                                                        | Name | Newcastle Social Prescribing Project      | Why | <p>Enable health professionals to refer (vulnerable) people with Long Term Conditions to non-clinical community services and networks</p> <p>- raise awareness and equip health professionals to be able to use the service through roll out of care planning training and support to all local practices</p> <p>- develop and maintain a comprehensive web-based information resource to support the project</p> | What | <p>The linkworker role was to support patients referred with:</p> <p>- personalised goal setting and buddying</p> <p>- selfcare so that people can self-care/self- manage their condition</p> <p>- signposting to sources of information, advice and support</p> | Who provided | <p>Strategic Link worker, project Coordinator, project Manager</p> <p>In addition other voluntary and community sector organisations and networks were involved in the project. The Quality of Life Partnership, HAREF and Involve North East supported the engagement of local people in the project.</p>                                                                                                                                                                                                                                                                                                                 | <p>Patient outcomes at baseline (pre intervention) and after intervention:</p> <ul style="list-style-type: none"> <li>- Short Warwick Edinburgh Mental Well-being Scale (SWEMWBS)</li> </ul> | <p>Peer-Review: no</p> <p>Funding source: Involve North East NESTA (National Endowment for Science, Technology and the Arts)</p> <p>Declaration of interest: not mentioned</p>                                                                                                                                                                                                                                                                                                                                                                                                                                                                                       |       |                                                                       |                   |                |           |              |                                                                                                                                                                                                                                                                                                                                                                                                                                                                                                                                                                                                                                                                                                                                                                                                                                                                                                                                                                                                                                                              |                                                                                                                                                                                                                                                                                                                                                                                                                                                                                                                                                                                                                    |
| N                       |                                                                                                                                                                                                                                                                                                                                                                                                                                                                                                                                                                                                                                                                      | 124                                                                                                                                                                                                                                                                                                                                                                                                                                                                                                                                                                                                                                                                                                                                                                                                            |   |  |      |     |              |      |               |          |      |           |                 |    |                    |   |   |                   |   |   |       |   |   |                                                                                                                         |                                                                                                                                                                                                                                                                                                                                                                                                                                                                                                                                                                                                                                                                                                                                                                                                                                                                                                                                                                                                                                                                                                                                                                                                                                                                                                                                                                                                                                                                                                                                                                                                                                                                                                                                                                                                                                                                                                                                                                                                                                                                                                                                                                                                                                                                                                                                                                                                                            |      |                                           |     |                                                                                                                                                                                                                                                                                                                                                                                                                   |      |                                                                                                                                                                                                                                                                  |              |                                                                                                                                                                                                                                                                                                                                                                                                                                                                                                                                                                                                                            |                                                                                                                                                                                              |                                                                                                                                                                                                                                                                                                                                                                                                                                                                                                                                                                                                                                                                      |       |                                                                       |                   |                |           |              |                                                                                                                                                                                                                                                                                                                                                                                                                                                                                                                                                                                                                                                                                                                                                                                                                                                                                                                                                                                                                                                              |                                                                                                                                                                                                                                                                                                                                                                                                                                                                                                                                                                                                                    |
| Age                     | < 61 years %                                                                                                                                                                                                                                                                                                                                                                                                                                                                                                                                                                                                                                                         | 71                                                                                                                                                                                                                                                                                                                                                                                                                                                                                                                                                                                                                                                                                                                                                                                                             |   |  |      |     |              |      |               |          |      |           |                 |    |                    |   |   |                   |   |   |       |   |   |                                                                                                                         |                                                                                                                                                                                                                                                                                                                                                                                                                                                                                                                                                                                                                                                                                                                                                                                                                                                                                                                                                                                                                                                                                                                                                                                                                                                                                                                                                                                                                                                                                                                                                                                                                                                                                                                                                                                                                                                                                                                                                                                                                                                                                                                                                                                                                                                                                                                                                                                                                            |      |                                           |     |                                                                                                                                                                                                                                                                                                                                                                                                                   |      |                                                                                                                                                                                                                                                                  |              |                                                                                                                                                                                                                                                                                                                                                                                                                                                                                                                                                                                                                            |                                                                                                                                                                                              |                                                                                                                                                                                                                                                                                                                                                                                                                                                                                                                                                                                                                                                                      |       |                                                                       |                   |                |           |              |                                                                                                                                                                                                                                                                                                                                                                                                                                                                                                                                                                                                                                                                                                                                                                                                                                                                                                                                                                                                                                                              |                                                                                                                                                                                                                                                                                                                                                                                                                                                                                                                                                                                                                    |
| Gender                  | Female %                                                                                                                                                                                                                                                                                                                                                                                                                                                                                                                                                                                                                                                             | 70                                                                                                                                                                                                                                                                                                                                                                                                                                                                                                                                                                                                                                                                                                                                                                                                             |   |  |      |     |              |      |               |          |      |           |                 |    |                    |   |   |                   |   |   |       |   |   |                                                                                                                         |                                                                                                                                                                                                                                                                                                                                                                                                                                                                                                                                                                                                                                                                                                                                                                                                                                                                                                                                                                                                                                                                                                                                                                                                                                                                                                                                                                                                                                                                                                                                                                                                                                                                                                                                                                                                                                                                                                                                                                                                                                                                                                                                                                                                                                                                                                                                                                                                                            |      |                                           |     |                                                                                                                                                                                                                                                                                                                                                                                                                   |      |                                                                                                                                                                                                                                                                  |              |                                                                                                                                                                                                                                                                                                                                                                                                                                                                                                                                                                                                                            |                                                                                                                                                                                              |                                                                                                                                                                                                                                                                                                                                                                                                                                                                                                                                                                                                                                                                      |       |                                                                       |                   |                |           |              |                                                                                                                                                                                                                                                                                                                                                                                                                                                                                                                                                                                                                                                                                                                                                                                                                                                                                                                                                                                                                                                              |                                                                                                                                                                                                                                                                                                                                                                                                                                                                                                                                                                                                                    |
| Ethnicity               | White British %                                                                                                                                                                                                                                                                                                                                                                                                                                                                                                                                                                                                                                                      | 76                                                                                                                                                                                                                                                                                                                                                                                                                                                                                                                                                                                                                                                                                                                                                                                                             |   |  |      |     |              |      |               |          |      |           |                 |    |                    |   |   |                   |   |   |       |   |   |                                                                                                                         |                                                                                                                                                                                                                                                                                                                                                                                                                                                                                                                                                                                                                                                                                                                                                                                                                                                                                                                                                                                                                                                                                                                                                                                                                                                                                                                                                                                                                                                                                                                                                                                                                                                                                                                                                                                                                                                                                                                                                                                                                                                                                                                                                                                                                                                                                                                                                                                                                            |      |                                           |     |                                                                                                                                                                                                                                                                                                                                                                                                                   |      |                                                                                                                                                                                                                                                                  |              |                                                                                                                                                                                                                                                                                                                                                                                                                                                                                                                                                                                                                            |                                                                                                                                                                                              |                                                                                                                                                                                                                                                                                                                                                                                                                                                                                                                                                                                                                                                                      |       |                                                                       |                   |                |           |              |                                                                                                                                                                                                                                                                                                                                                                                                                                                                                                                                                                                                                                                                                                                                                                                                                                                                                                                                                                                                                                                              |                                                                                                                                                                                                                                                                                                                                                                                                                                                                                                                                                                                                                    |
| Living arrangement      | -                                                                                                                                                                                                                                                                                                                                                                                                                                                                                                                                                                                                                                                                    | -                                                                                                                                                                                                                                                                                                                                                                                                                                                                                                                                                                                                                                                                                                                                                                                                              |   |  |      |     |              |      |               |          |      |           |                 |    |                    |   |   |                   |   |   |       |   |   |                                                                                                                         |                                                                                                                                                                                                                                                                                                                                                                                                                                                                                                                                                                                                                                                                                                                                                                                                                                                                                                                                                                                                                                                                                                                                                                                                                                                                                                                                                                                                                                                                                                                                                                                                                                                                                                                                                                                                                                                                                                                                                                                                                                                                                                                                                                                                                                                                                                                                                                                                                            |      |                                           |     |                                                                                                                                                                                                                                                                                                                                                                                                                   |      |                                                                                                                                                                                                                                                                  |              |                                                                                                                                                                                                                                                                                                                                                                                                                                                                                                                                                                                                                            |                                                                                                                                                                                              |                                                                                                                                                                                                                                                                                                                                                                                                                                                                                                                                                                                                                                                                      |       |                                                                       |                   |                |           |              |                                                                                                                                                                                                                                                                                                                                                                                                                                                                                                                                                                                                                                                                                                                                                                                                                                                                                                                                                                                                                                                              |                                                                                                                                                                                                                                                                                                                                                                                                                                                                                                                                                                                                                    |
| Employment status       | -                                                                                                                                                                                                                                                                                                                                                                                                                                                                                                                                                                                                                                                                    | -                                                                                                                                                                                                                                                                                                                                                                                                                                                                                                                                                                                                                                                                                                                                                                                                              |   |  |      |     |              |      |               |          |      |           |                 |    |                    |   |   |                   |   |   |       |   |   |                                                                                                                         |                                                                                                                                                                                                                                                                                                                                                                                                                                                                                                                                                                                                                                                                                                                                                                                                                                                                                                                                                                                                                                                                                                                                                                                                                                                                                                                                                                                                                                                                                                                                                                                                                                                                                                                                                                                                                                                                                                                                                                                                                                                                                                                                                                                                                                                                                                                                                                                                                            |      |                                           |     |                                                                                                                                                                                                                                                                                                                                                                                                                   |      |                                                                                                                                                                                                                                                                  |              |                                                                                                                                                                                                                                                                                                                                                                                                                                                                                                                                                                                                                            |                                                                                                                                                                                              |                                                                                                                                                                                                                                                                                                                                                                                                                                                                                                                                                                                                                                                                      |       |                                                                       |                   |                |           |              |                                                                                                                                                                                                                                                                                                                                                                                                                                                                                                                                                                                                                                                                                                                                                                                                                                                                                                                                                                                                                                                              |                                                                                                                                                                                                                                                                                                                                                                                                                                                                                                                                                                                                                    |
| other                   | -                                                                                                                                                                                                                                                                                                                                                                                                                                                                                                                                                                                                                                                                    | -                                                                                                                                                                                                                                                                                                                                                                                                                                                                                                                                                                                                                                                                                                                                                                                                              |   |  |      |     |              |      |               |          |      |           |                 |    |                    |   |   |                   |   |   |       |   |   |                                                                                                                         |                                                                                                                                                                                                                                                                                                                                                                                                                                                                                                                                                                                                                                                                                                                                                                                                                                                                                                                                                                                                                                                                                                                                                                                                                                                                                                                                                                                                                                                                                                                                                                                                                                                                                                                                                                                                                                                                                                                                                                                                                                                                                                                                                                                                                                                                                                                                                                                                                            |      |                                           |     |                                                                                                                                                                                                                                                                                                                                                                                                                   |      |                                                                                                                                                                                                                                                                  |              |                                                                                                                                                                                                                                                                                                                                                                                                                                                                                                                                                                                                                            |                                                                                                                                                                                              |                                                                                                                                                                                                                                                                                                                                                                                                                                                                                                                                                                                                                                                                      |       |                                                                       |                   |                |           |              |                                                                                                                                                                                                                                                                                                                                                                                                                                                                                                                                                                                                                                                                                                                                                                                                                                                                                                                                                                                                                                                              |                                                                                                                                                                                                                                                                                                                                                                                                                                                                                                                                                                                                                    |
| Name                    | Newcastle Social Prescribing Project                                                                                                                                                                                                                                                                                                                                                                                                                                                                                                                                                                                                                                 |                                                                                                                                                                                                                                                                                                                                                                                                                                                                                                                                                                                                                                                                                                                                                                                                                |   |  |      |     |              |      |               |          |      |           |                 |    |                    |   |   |                   |   |   |       |   |   |                                                                                                                         |                                                                                                                                                                                                                                                                                                                                                                                                                                                                                                                                                                                                                                                                                                                                                                                                                                                                                                                                                                                                                                                                                                                                                                                                                                                                                                                                                                                                                                                                                                                                                                                                                                                                                                                                                                                                                                                                                                                                                                                                                                                                                                                                                                                                                                                                                                                                                                                                                            |      |                                           |     |                                                                                                                                                                                                                                                                                                                                                                                                                   |      |                                                                                                                                                                                                                                                                  |              |                                                                                                                                                                                                                                                                                                                                                                                                                                                                                                                                                                                                                            |                                                                                                                                                                                              |                                                                                                                                                                                                                                                                                                                                                                                                                                                                                                                                                                                                                                                                      |       |                                                                       |                   |                |           |              |                                                                                                                                                                                                                                                                                                                                                                                                                                                                                                                                                                                                                                                                                                                                                                                                                                                                                                                                                                                                                                                              |                                                                                                                                                                                                                                                                                                                                                                                                                                                                                                                                                                                                                    |
| Why                     | <p>Enable health professionals to refer (vulnerable) people with Long Term Conditions to non-clinical community services and networks</p> <p>- raise awareness and equip health professionals to be able to use the service through roll out of care planning training and support to all local practices</p> <p>- develop and maintain a comprehensive web-based information resource to support the project</p>                                                                                                                                                                                                                                                    |                                                                                                                                                                                                                                                                                                                                                                                                                                                                                                                                                                                                                                                                                                                                                                                                                |   |  |      |     |              |      |               |          |      |           |                 |    |                    |   |   |                   |   |   |       |   |   |                                                                                                                         |                                                                                                                                                                                                                                                                                                                                                                                                                                                                                                                                                                                                                                                                                                                                                                                                                                                                                                                                                                                                                                                                                                                                                                                                                                                                                                                                                                                                                                                                                                                                                                                                                                                                                                                                                                                                                                                                                                                                                                                                                                                                                                                                                                                                                                                                                                                                                                                                                            |      |                                           |     |                                                                                                                                                                                                                                                                                                                                                                                                                   |      |                                                                                                                                                                                                                                                                  |              |                                                                                                                                                                                                                                                                                                                                                                                                                                                                                                                                                                                                                            |                                                                                                                                                                                              |                                                                                                                                                                                                                                                                                                                                                                                                                                                                                                                                                                                                                                                                      |       |                                                                       |                   |                |           |              |                                                                                                                                                                                                                                                                                                                                                                                                                                                                                                                                                                                                                                                                                                                                                                                                                                                                                                                                                                                                                                                              |                                                                                                                                                                                                                                                                                                                                                                                                                                                                                                                                                                                                                    |
| What                    | <p>The linkworker role was to support patients referred with:</p> <p>- personalised goal setting and buddying</p> <p>- selfcare so that people can self-care/self- manage their condition</p> <p>- signposting to sources of information, advice and support</p>                                                                                                                                                                                                                                                                                                                                                                                                     |                                                                                                                                                                                                                                                                                                                                                                                                                                                                                                                                                                                                                                                                                                                                                                                                                |   |  |      |     |              |      |               |          |      |           |                 |    |                    |   |   |                   |   |   |       |   |   |                                                                                                                         |                                                                                                                                                                                                                                                                                                                                                                                                                                                                                                                                                                                                                                                                                                                                                                                                                                                                                                                                                                                                                                                                                                                                                                                                                                                                                                                                                                                                                                                                                                                                                                                                                                                                                                                                                                                                                                                                                                                                                                                                                                                                                                                                                                                                                                                                                                                                                                                                                            |      |                                           |     |                                                                                                                                                                                                                                                                                                                                                                                                                   |      |                                                                                                                                                                                                                                                                  |              |                                                                                                                                                                                                                                                                                                                                                                                                                                                                                                                                                                                                                            |                                                                                                                                                                                              |                                                                                                                                                                                                                                                                                                                                                                                                                                                                                                                                                                                                                                                                      |       |                                                                       |                   |                |           |              |                                                                                                                                                                                                                                                                                                                                                                                                                                                                                                                                                                                                                                                                                                                                                                                                                                                                                                                                                                                                                                                              |                                                                                                                                                                                                                                                                                                                                                                                                                                                                                                                                                                                                                    |
| Who provided            | <p>Strategic Link worker, project Coordinator, project Manager</p> <p>In addition other voluntary and community sector organisations and networks were involved in the project. The Quality of Life Partnership, HAREF and Involve North East supported the engagement of local people in the project.</p>                                                                                                                                                                                                                                                                                                                                                           |                                                                                                                                                                                                                                                                                                                                                                                                                                                                                                                                                                                                                                                                                                                                                                                                                |   |  |      |     |              |      |               |          |      |           |                 |    |                    |   |   |                   |   |   |       |   |   |                                                                                                                         |                                                                                                                                                                                                                                                                                                                                                                                                                                                                                                                                                                                                                                                                                                                                                                                                                                                                                                                                                                                                                                                                                                                                                                                                                                                                                                                                                                                                                                                                                                                                                                                                                                                                                                                                                                                                                                                                                                                                                                                                                                                                                                                                                                                                                                                                                                                                                                                                                            |      |                                           |     |                                                                                                                                                                                                                                                                                                                                                                                                                   |      |                                                                                                                                                                                                                                                                  |              |                                                                                                                                                                                                                                                                                                                                                                                                                                                                                                                                                                                                                            |                                                                                                                                                                                              |                                                                                                                                                                                                                                                                                                                                                                                                                                                                                                                                                                                                                                                                      |       |                                                                       |                   |                |           |              |                                                                                                                                                                                                                                                                                                                                                                                                                                                                                                                                                                                                                                                                                                                                                                                                                                                                                                                                                                                                                                                              |                                                                                                                                                                                                                                                                                                                                                                                                                                                                                                                                                                                                                    |



|                   |                                                                                                                                                                                                                                                                                                                                                     |                                            |  |                                                                                                                                                                                                                                                                                                                                                                                                                                                                                                                                                                                                                    |     |            |       |   |                   |   |           |              |               |                                                                                                                                                                                                                                                                                                                                                     |  |  |
|-------------------|-----------------------------------------------------------------------------------------------------------------------------------------------------------------------------------------------------------------------------------------------------------------------------------------------------------------------------------------------------|--------------------------------------------|--|--------------------------------------------------------------------------------------------------------------------------------------------------------------------------------------------------------------------------------------------------------------------------------------------------------------------------------------------------------------------------------------------------------------------------------------------------------------------------------------------------------------------------------------------------------------------------------------------------------------------|-----|------------|-------|---|-------------------|---|-----------|--------------|---------------|-----------------------------------------------------------------------------------------------------------------------------------------------------------------------------------------------------------------------------------------------------------------------------------------------------------------------------------------------------|--|--|
|                   |                                                                                                                                                                                                                                                                                                                                                     | Population: Special (long term conditions) |  | <table border="1"> <tr> <td>How</td> <td>One-to-one</td> </tr> <tr> <td>Where</td> <td>-</td> </tr> <tr> <td>When and How Much</td> <td>-</td> </tr> <tr> <td>Tailoring</td> <td>Personalized</td> </tr> <tr> <td>Modifications</td> <td> <p>The delivery model outlined in the initial NESTA application with a lead organisation managing a 3 person project team was not delivered</p> <p>- the strategic link worker role was to be provided by a project team member, it was agreed the project link worker function could be delivered through the consortium of existing providers</p> </td> </tr> </table> | How | One-to-one | Where | - | When and How Much | - | Tailoring | Personalized | Modifications | <p>The delivery model outlined in the initial NESTA application with a lead organisation managing a 3 person project team was not delivered</p> <p>- the strategic link worker role was to be provided by a project team member, it was agreed the project link worker function could be delivered through the consortium of existing providers</p> |  |  |
| How               | One-to-one                                                                                                                                                                                                                                                                                                                                          |                                            |  |                                                                                                                                                                                                                                                                                                                                                                                                                                                                                                                                                                                                                    |     |            |       |   |                   |   |           |              |               |                                                                                                                                                                                                                                                                                                                                                     |  |  |
| Where             | -                                                                                                                                                                                                                                                                                                                                                   |                                            |  |                                                                                                                                                                                                                                                                                                                                                                                                                                                                                                                                                                                                                    |     |            |       |   |                   |   |           |              |               |                                                                                                                                                                                                                                                                                                                                                     |  |  |
| When and How Much | -                                                                                                                                                                                                                                                                                                                                                   |                                            |  |                                                                                                                                                                                                                                                                                                                                                                                                                                                                                                                                                                                                                    |     |            |       |   |                   |   |           |              |               |                                                                                                                                                                                                                                                                                                                                                     |  |  |
| Tailoring         | Personalized                                                                                                                                                                                                                                                                                                                                        |                                            |  |                                                                                                                                                                                                                                                                                                                                                                                                                                                                                                                                                                                                                    |     |            |       |   |                   |   |           |              |               |                                                                                                                                                                                                                                                                                                                                                     |  |  |
| Modifications     | <p>The delivery model outlined in the initial NESTA application with a lead organisation managing a 3 person project team was not delivered</p> <p>- the strategic link worker role was to be provided by a project team member, it was agreed the project link worker function could be delivered through the consortium of existing providers</p> |                                            |  |                                                                                                                                                                                                                                                                                                                                                                                                                                                                                                                                                                                                                    |     |            |       |   |                   |   |           |              |               |                                                                                                                                                                                                                                                                                                                                                     |  |  |
|                   |                                                                                                                                                                                                                                                                                                                                                     |                                            |  | Intervention: Holistic                                                                                                                                                                                                                                                                                                                                                                                                                                                                                                                                                                                             |     |            |       |   |                   |   |           |              |               |                                                                                                                                                                                                                                                                                                                                                     |  |  |

|                           |                                                                                                                                                                                                                                                                                                                                                                                                                                                                                                                                                                                                                                                                                                                                                                                           |                                                                                                                                                                                                                                                                                                                                                                                                                                                                                                                                                                                                                                                                                                                                                                                                                                                                                                                                                       |   |  |      |     |                    |    |        |          |    |           |         |    |                    |   |   |                   |   |   |       |                                                        |    |                                                                                       |                                                                                                                                                                                                                                                                                                                                                                                                                                                                                                                                                                                                                                                                                                                                                                                                                                                                                                                                                                                                                                                                                                                                                                                                                                                                                                                                                                                                                                                                                                                                                                                                                                                                                                                                                                                                                                                                                                                                                                                                                                                                                                                                                                                                                                                                                                                                                                                                                                                                                                                                                                                                                                                                                                                                                                                                                                                                                                                                                                                                            |      |                                  |     |                                                                                                                                                                                                                                                                                                                                 |      |                                                                                                                                                                                                                                                                                                                                                               |              |                                                                                                                                                                                                                                                                                                                                                                                                                                                                                                                                                                                                                                                                                                                                                                                           |     |                                                                                                                                                                                                                                                                                                                                                                                                                                                                                                    |       |                                                                                                                                                    |                   |                                                                                                                                                                                                                                                                                                                                       |           |                                                                    |                                                                                                                                                                                                                                                                                                                                                                                                                                                               |                                                                                                                                        |
|---------------------------|-------------------------------------------------------------------------------------------------------------------------------------------------------------------------------------------------------------------------------------------------------------------------------------------------------------------------------------------------------------------------------------------------------------------------------------------------------------------------------------------------------------------------------------------------------------------------------------------------------------------------------------------------------------------------------------------------------------------------------------------------------------------------------------------|-------------------------------------------------------------------------------------------------------------------------------------------------------------------------------------------------------------------------------------------------------------------------------------------------------------------------------------------------------------------------------------------------------------------------------------------------------------------------------------------------------------------------------------------------------------------------------------------------------------------------------------------------------------------------------------------------------------------------------------------------------------------------------------------------------------------------------------------------------------------------------------------------------------------------------------------------------|---|--|------|-----|--------------------|----|--------|----------|----|-----------|---------|----|--------------------|---|---|-------------------|---|---|-------|--------------------------------------------------------|----|---------------------------------------------------------------------------------------|------------------------------------------------------------------------------------------------------------------------------------------------------------------------------------------------------------------------------------------------------------------------------------------------------------------------------------------------------------------------------------------------------------------------------------------------------------------------------------------------------------------------------------------------------------------------------------------------------------------------------------------------------------------------------------------------------------------------------------------------------------------------------------------------------------------------------------------------------------------------------------------------------------------------------------------------------------------------------------------------------------------------------------------------------------------------------------------------------------------------------------------------------------------------------------------------------------------------------------------------------------------------------------------------------------------------------------------------------------------------------------------------------------------------------------------------------------------------------------------------------------------------------------------------------------------------------------------------------------------------------------------------------------------------------------------------------------------------------------------------------------------------------------------------------------------------------------------------------------------------------------------------------------------------------------------------------------------------------------------------------------------------------------------------------------------------------------------------------------------------------------------------------------------------------------------------------------------------------------------------------------------------------------------------------------------------------------------------------------------------------------------------------------------------------------------------------------------------------------------------------------------------------------------------------------------------------------------------------------------------------------------------------------------------------------------------------------------------------------------------------------------------------------------------------------------------------------------------------------------------------------------------------------------------------------------------------------------------------------------------------------|------|----------------------------------|-----|---------------------------------------------------------------------------------------------------------------------------------------------------------------------------------------------------------------------------------------------------------------------------------------------------------------------------------|------|---------------------------------------------------------------------------------------------------------------------------------------------------------------------------------------------------------------------------------------------------------------------------------------------------------------------------------------------------------------|--------------|-------------------------------------------------------------------------------------------------------------------------------------------------------------------------------------------------------------------------------------------------------------------------------------------------------------------------------------------------------------------------------------------------------------------------------------------------------------------------------------------------------------------------------------------------------------------------------------------------------------------------------------------------------------------------------------------------------------------------------------------------------------------------------------------|-----|----------------------------------------------------------------------------------------------------------------------------------------------------------------------------------------------------------------------------------------------------------------------------------------------------------------------------------------------------------------------------------------------------------------------------------------------------------------------------------------------------|-------|----------------------------------------------------------------------------------------------------------------------------------------------------|-------------------|---------------------------------------------------------------------------------------------------------------------------------------------------------------------------------------------------------------------------------------------------------------------------------------------------------------------------------------|-----------|--------------------------------------------------------------------|---------------------------------------------------------------------------------------------------------------------------------------------------------------------------------------------------------------------------------------------------------------------------------------------------------------------------------------------------------------------------------------------------------------------------------------------------------------|----------------------------------------------------------------------------------------------------------------------------------------|
| <p>Ferguson 2018 (62)</p> | <p>Uncontrolled before-and-after study, mixed-methods</p> <p>Study length: 8 months</p>                                                                                                                                                                                                                                                                                                                                                                                                                                                                                                                                                                                                                                                                                                   | <p><b>Inclusion criteria:</b></p> <ul style="list-style-type: none"> <li>- clients who are registered with a Tower Hamlets GP have expressed a non-clinical support need and</li> <li>- aged 18 and over (with Network 1 also seeing clients aged 16-18)</li> <li>- parents with issues related to their children</li> </ul> <p><b>Exclusion criteria:-</b></p> <p>Baseline characteristics:</p> <table border="1" data-bbox="477 457 1071 877"> <tr> <td>N</td> <td></td> <td>2270</td> </tr> <tr> <td>Age</td> <td>Age group: 30-64 %</td> <td>70</td> </tr> <tr> <td>Gender</td> <td>Female %</td> <td>60</td> </tr> <tr> <td>Ethnicity</td> <td>White %</td> <td>23</td> </tr> <tr> <td>Living arrangement</td> <td>-</td> <td>-</td> </tr> <tr> <td>Employment status</td> <td>-</td> <td>-</td> </tr> <tr> <td>other</td> <td>Clients with at least one long-term health condition %</td> <td>52</td> </tr> </table> <p>Population: General</p> | N |  | 2270 | Age | Age group: 30-64 % | 70 | Gender | Female % | 60 | Ethnicity | White % | 23 | Living arrangement | - | - | Employment status | - | - | other | Clients with at least one long-term health condition % | 52 | <p>Primary care</p> <p>Country: UK (London Borough of Tower Hamlets, East London)</p> | <table border="1" data-bbox="1308 226 2228 1577"> <tr> <td>Name</td> <td>Tower Hamlets social prescribing</td> </tr> <tr> <td>Why</td> <td>Residents in Tower Hamlets experience poorer health outcomes than the general population<br/>- in deprived areas patients often visit their GP for reasons other than clinical problems as a result of not knowing where to get support for their wider social issues, which have a significant, negative impact on their health</td> </tr> <tr> <td>What</td> <td>Social prescribing scheme<br/><br/>- needs are discussed during the course of the consultation and referrals or sign-posts are made to organisations which can support those needs<br/><br/>- majority of support organisations are in the voluntary and community sector or informal support groups, although some referrals are made to statutory organisations</td> </tr> <tr> <td>Who provided</td> <td>10 Social Prescribers<br/>- 1 Social Prescriber in each of the GP Networks (8 networks, overall 37 GP practices), with an extra part-time Social Prescriber in Networks 1 and 6<br/><br/>All of the Social Prescribers are required to undertake the following training as part of their contract:<br/>- Motivational Interviewing, Making Every Contact Count (MECC), Information Governance, Basic Life Support, Safeguarding<br/>Social Prescribers are line managed by the Network Manager in their GP Network. The multi-agency strategic Steering Group oversees service delivery, providing expertise and project management, driving and overseeing service developments, including around data recording, helping to rectify any operational issues and supporting service evaluation</td> </tr> <tr> <td>How</td> <td>Where Social Prescribers have access to EMIS19, referrals generally come via EMIS, otherwise hard copy referral forms are used, self-referrals are also accepted and can be made over the phone, via email, or via reception staff<br/><br/>- Client consultations are conducted either on the telephone or in face-to-face appointments, depending on need<br/><br/>- Social Prescribers use a range of motivational interviewing, goal-setting and coaching skills in their discussions with clients</td> </tr> <tr> <td>Where</td> <td>Face-to-face or via telephone, in three Networks, where felt necessary on an individual client basis<br/><br/>- Social Prescribers offer home visits</td> </tr> <tr> <td>When and How Much</td> <td>Each consultation: 30-60 min<br/><br/>- most Networks place no restriction on the number of consultations a client may have with a Social Prescriber, but two apply a guide to the maximum number, ranging from 4 to 6<br/><br/>- in five of the Networks, in exceptional circumstances, Social Prescribers accompany clients to services</td> </tr> <tr> <td>Tailoring</td> <td>Referral process differs slightly across the different GP Networks</td> </tr> </table> <p>Intervention: Light</p> | Name | Tower Hamlets social prescribing | Why | Residents in Tower Hamlets experience poorer health outcomes than the general population<br>- in deprived areas patients often visit their GP for reasons other than clinical problems as a result of not knowing where to get support for their wider social issues, which have a significant, negative impact on their health | What | Social prescribing scheme<br><br>- needs are discussed during the course of the consultation and referrals or sign-posts are made to organisations which can support those needs<br><br>- majority of support organisations are in the voluntary and community sector or informal support groups, although some referrals are made to statutory organisations | Who provided | 10 Social Prescribers<br>- 1 Social Prescriber in each of the GP Networks (8 networks, overall 37 GP practices), with an extra part-time Social Prescriber in Networks 1 and 6<br><br>All of the Social Prescribers are required to undertake the following training as part of their contract:<br>- Motivational Interviewing, Making Every Contact Count (MECC), Information Governance, Basic Life Support, Safeguarding<br>Social Prescribers are line managed by the Network Manager in their GP Network. The multi-agency strategic Steering Group oversees service delivery, providing expertise and project management, driving and overseeing service developments, including around data recording, helping to rectify any operational issues and supporting service evaluation | How | Where Social Prescribers have access to EMIS19, referrals generally come via EMIS, otherwise hard copy referral forms are used, self-referrals are also accepted and can be made over the phone, via email, or via reception staff<br><br>- Client consultations are conducted either on the telephone or in face-to-face appointments, depending on need<br><br>- Social Prescribers use a range of motivational interviewing, goal-setting and coaching skills in their discussions with clients | Where | Face-to-face or via telephone, in three Networks, where felt necessary on an individual client basis<br><br>- Social Prescribers offer home visits | When and How Much | Each consultation: 30-60 min<br><br>- most Networks place no restriction on the number of consultations a client may have with a Social Prescriber, but two apply a guide to the maximum number, ranging from 4 to 6<br><br>- in five of the Networks, in exceptional circumstances, Social Prescribers accompany clients to services | Tailoring | Referral process differs slightly across the different GP Networks | <p>Patient outcomes at baseline (pre intervention via Social Prescriber) and 12-weeks follow-up (via follow-up calls):</p> <ul style="list-style-type: none"> <li>- Measure Yourself Concerns and Wellbeing (MyCaW)</li> </ul> <p>Process of care measures 6 months before and 6 months after (data from case management system on referrals by practice and professional):</p> <ul style="list-style-type: none"> <li>- number of GP appointments</li> </ul> | <p>Peer-Review: no</p> <p>Funding source: Tower Hamlets Clinical Commissioning Group</p> <p>Declaration of interest: Not mentioned</p> |
| N                         |                                                                                                                                                                                                                                                                                                                                                                                                                                                                                                                                                                                                                                                                                                                                                                                           | 2270                                                                                                                                                                                                                                                                                                                                                                                                                                                                                                                                                                                                                                                                                                                                                                                                                                                                                                                                                  |   |  |      |     |                    |    |        |          |    |           |         |    |                    |   |   |                   |   |   |       |                                                        |    |                                                                                       |                                                                                                                                                                                                                                                                                                                                                                                                                                                                                                                                                                                                                                                                                                                                                                                                                                                                                                                                                                                                                                                                                                                                                                                                                                                                                                                                                                                                                                                                                                                                                                                                                                                                                                                                                                                                                                                                                                                                                                                                                                                                                                                                                                                                                                                                                                                                                                                                                                                                                                                                                                                                                                                                                                                                                                                                                                                                                                                                                                                                            |      |                                  |     |                                                                                                                                                                                                                                                                                                                                 |      |                                                                                                                                                                                                                                                                                                                                                               |              |                                                                                                                                                                                                                                                                                                                                                                                                                                                                                                                                                                                                                                                                                                                                                                                           |     |                                                                                                                                                                                                                                                                                                                                                                                                                                                                                                    |       |                                                                                                                                                    |                   |                                                                                                                                                                                                                                                                                                                                       |           |                                                                    |                                                                                                                                                                                                                                                                                                                                                                                                                                                               |                                                                                                                                        |
| Age                       | Age group: 30-64 %                                                                                                                                                                                                                                                                                                                                                                                                                                                                                                                                                                                                                                                                                                                                                                        | 70                                                                                                                                                                                                                                                                                                                                                                                                                                                                                                                                                                                                                                                                                                                                                                                                                                                                                                                                                    |   |  |      |     |                    |    |        |          |    |           |         |    |                    |   |   |                   |   |   |       |                                                        |    |                                                                                       |                                                                                                                                                                                                                                                                                                                                                                                                                                                                                                                                                                                                                                                                                                                                                                                                                                                                                                                                                                                                                                                                                                                                                                                                                                                                                                                                                                                                                                                                                                                                                                                                                                                                                                                                                                                                                                                                                                                                                                                                                                                                                                                                                                                                                                                                                                                                                                                                                                                                                                                                                                                                                                                                                                                                                                                                                                                                                                                                                                                                            |      |                                  |     |                                                                                                                                                                                                                                                                                                                                 |      |                                                                                                                                                                                                                                                                                                                                                               |              |                                                                                                                                                                                                                                                                                                                                                                                                                                                                                                                                                                                                                                                                                                                                                                                           |     |                                                                                                                                                                                                                                                                                                                                                                                                                                                                                                    |       |                                                                                                                                                    |                   |                                                                                                                                                                                                                                                                                                                                       |           |                                                                    |                                                                                                                                                                                                                                                                                                                                                                                                                                                               |                                                                                                                                        |
| Gender                    | Female %                                                                                                                                                                                                                                                                                                                                                                                                                                                                                                                                                                                                                                                                                                                                                                                  | 60                                                                                                                                                                                                                                                                                                                                                                                                                                                                                                                                                                                                                                                                                                                                                                                                                                                                                                                                                    |   |  |      |     |                    |    |        |          |    |           |         |    |                    |   |   |                   |   |   |       |                                                        |    |                                                                                       |                                                                                                                                                                                                                                                                                                                                                                                                                                                                                                                                                                                                                                                                                                                                                                                                                                                                                                                                                                                                                                                                                                                                                                                                                                                                                                                                                                                                                                                                                                                                                                                                                                                                                                                                                                                                                                                                                                                                                                                                                                                                                                                                                                                                                                                                                                                                                                                                                                                                                                                                                                                                                                                                                                                                                                                                                                                                                                                                                                                                            |      |                                  |     |                                                                                                                                                                                                                                                                                                                                 |      |                                                                                                                                                                                                                                                                                                                                                               |              |                                                                                                                                                                                                                                                                                                                                                                                                                                                                                                                                                                                                                                                                                                                                                                                           |     |                                                                                                                                                                                                                                                                                                                                                                                                                                                                                                    |       |                                                                                                                                                    |                   |                                                                                                                                                                                                                                                                                                                                       |           |                                                                    |                                                                                                                                                                                                                                                                                                                                                                                                                                                               |                                                                                                                                        |
| Ethnicity                 | White %                                                                                                                                                                                                                                                                                                                                                                                                                                                                                                                                                                                                                                                                                                                                                                                   | 23                                                                                                                                                                                                                                                                                                                                                                                                                                                                                                                                                                                                                                                                                                                                                                                                                                                                                                                                                    |   |  |      |     |                    |    |        |          |    |           |         |    |                    |   |   |                   |   |   |       |                                                        |    |                                                                                       |                                                                                                                                                                                                                                                                                                                                                                                                                                                                                                                                                                                                                                                                                                                                                                                                                                                                                                                                                                                                                                                                                                                                                                                                                                                                                                                                                                                                                                                                                                                                                                                                                                                                                                                                                                                                                                                                                                                                                                                                                                                                                                                                                                                                                                                                                                                                                                                                                                                                                                                                                                                                                                                                                                                                                                                                                                                                                                                                                                                                            |      |                                  |     |                                                                                                                                                                                                                                                                                                                                 |      |                                                                                                                                                                                                                                                                                                                                                               |              |                                                                                                                                                                                                                                                                                                                                                                                                                                                                                                                                                                                                                                                                                                                                                                                           |     |                                                                                                                                                                                                                                                                                                                                                                                                                                                                                                    |       |                                                                                                                                                    |                   |                                                                                                                                                                                                                                                                                                                                       |           |                                                                    |                                                                                                                                                                                                                                                                                                                                                                                                                                                               |                                                                                                                                        |
| Living arrangement        | -                                                                                                                                                                                                                                                                                                                                                                                                                                                                                                                                                                                                                                                                                                                                                                                         | -                                                                                                                                                                                                                                                                                                                                                                                                                                                                                                                                                                                                                                                                                                                                                                                                                                                                                                                                                     |   |  |      |     |                    |    |        |          |    |           |         |    |                    |   |   |                   |   |   |       |                                                        |    |                                                                                       |                                                                                                                                                                                                                                                                                                                                                                                                                                                                                                                                                                                                                                                                                                                                                                                                                                                                                                                                                                                                                                                                                                                                                                                                                                                                                                                                                                                                                                                                                                                                                                                                                                                                                                                                                                                                                                                                                                                                                                                                                                                                                                                                                                                                                                                                                                                                                                                                                                                                                                                                                                                                                                                                                                                                                                                                                                                                                                                                                                                                            |      |                                  |     |                                                                                                                                                                                                                                                                                                                                 |      |                                                                                                                                                                                                                                                                                                                                                               |              |                                                                                                                                                                                                                                                                                                                                                                                                                                                                                                                                                                                                                                                                                                                                                                                           |     |                                                                                                                                                                                                                                                                                                                                                                                                                                                                                                    |       |                                                                                                                                                    |                   |                                                                                                                                                                                                                                                                                                                                       |           |                                                                    |                                                                                                                                                                                                                                                                                                                                                                                                                                                               |                                                                                                                                        |
| Employment status         | -                                                                                                                                                                                                                                                                                                                                                                                                                                                                                                                                                                                                                                                                                                                                                                                         | -                                                                                                                                                                                                                                                                                                                                                                                                                                                                                                                                                                                                                                                                                                                                                                                                                                                                                                                                                     |   |  |      |     |                    |    |        |          |    |           |         |    |                    |   |   |                   |   |   |       |                                                        |    |                                                                                       |                                                                                                                                                                                                                                                                                                                                                                                                                                                                                                                                                                                                                                                                                                                                                                                                                                                                                                                                                                                                                                                                                                                                                                                                                                                                                                                                                                                                                                                                                                                                                                                                                                                                                                                                                                                                                                                                                                                                                                                                                                                                                                                                                                                                                                                                                                                                                                                                                                                                                                                                                                                                                                                                                                                                                                                                                                                                                                                                                                                                            |      |                                  |     |                                                                                                                                                                                                                                                                                                                                 |      |                                                                                                                                                                                                                                                                                                                                                               |              |                                                                                                                                                                                                                                                                                                                                                                                                                                                                                                                                                                                                                                                                                                                                                                                           |     |                                                                                                                                                                                                                                                                                                                                                                                                                                                                                                    |       |                                                                                                                                                    |                   |                                                                                                                                                                                                                                                                                                                                       |           |                                                                    |                                                                                                                                                                                                                                                                                                                                                                                                                                                               |                                                                                                                                        |
| other                     | Clients with at least one long-term health condition %                                                                                                                                                                                                                                                                                                                                                                                                                                                                                                                                                                                                                                                                                                                                    | 52                                                                                                                                                                                                                                                                                                                                                                                                                                                                                                                                                                                                                                                                                                                                                                                                                                                                                                                                                    |   |  |      |     |                    |    |        |          |    |           |         |    |                    |   |   |                   |   |   |       |                                                        |    |                                                                                       |                                                                                                                                                                                                                                                                                                                                                                                                                                                                                                                                                                                                                                                                                                                                                                                                                                                                                                                                                                                                                                                                                                                                                                                                                                                                                                                                                                                                                                                                                                                                                                                                                                                                                                                                                                                                                                                                                                                                                                                                                                                                                                                                                                                                                                                                                                                                                                                                                                                                                                                                                                                                                                                                                                                                                                                                                                                                                                                                                                                                            |      |                                  |     |                                                                                                                                                                                                                                                                                                                                 |      |                                                                                                                                                                                                                                                                                                                                                               |              |                                                                                                                                                                                                                                                                                                                                                                                                                                                                                                                                                                                                                                                                                                                                                                                           |     |                                                                                                                                                                                                                                                                                                                                                                                                                                                                                                    |       |                                                                                                                                                    |                   |                                                                                                                                                                                                                                                                                                                                       |           |                                                                    |                                                                                                                                                                                                                                                                                                                                                                                                                                                               |                                                                                                                                        |
| Name                      | Tower Hamlets social prescribing                                                                                                                                                                                                                                                                                                                                                                                                                                                                                                                                                                                                                                                                                                                                                          |                                                                                                                                                                                                                                                                                                                                                                                                                                                                                                                                                                                                                                                                                                                                                                                                                                                                                                                                                       |   |  |      |     |                    |    |        |          |    |           |         |    |                    |   |   |                   |   |   |       |                                                        |    |                                                                                       |                                                                                                                                                                                                                                                                                                                                                                                                                                                                                                                                                                                                                                                                                                                                                                                                                                                                                                                                                                                                                                                                                                                                                                                                                                                                                                                                                                                                                                                                                                                                                                                                                                                                                                                                                                                                                                                                                                                                                                                                                                                                                                                                                                                                                                                                                                                                                                                                                                                                                                                                                                                                                                                                                                                                                                                                                                                                                                                                                                                                            |      |                                  |     |                                                                                                                                                                                                                                                                                                                                 |      |                                                                                                                                                                                                                                                                                                                                                               |              |                                                                                                                                                                                                                                                                                                                                                                                                                                                                                                                                                                                                                                                                                                                                                                                           |     |                                                                                                                                                                                                                                                                                                                                                                                                                                                                                                    |       |                                                                                                                                                    |                   |                                                                                                                                                                                                                                                                                                                                       |           |                                                                    |                                                                                                                                                                                                                                                                                                                                                                                                                                                               |                                                                                                                                        |
| Why                       | Residents in Tower Hamlets experience poorer health outcomes than the general population<br>- in deprived areas patients often visit their GP for reasons other than clinical problems as a result of not knowing where to get support for their wider social issues, which have a significant, negative impact on their health                                                                                                                                                                                                                                                                                                                                                                                                                                                           |                                                                                                                                                                                                                                                                                                                                                                                                                                                                                                                                                                                                                                                                                                                                                                                                                                                                                                                                                       |   |  |      |     |                    |    |        |          |    |           |         |    |                    |   |   |                   |   |   |       |                                                        |    |                                                                                       |                                                                                                                                                                                                                                                                                                                                                                                                                                                                                                                                                                                                                                                                                                                                                                                                                                                                                                                                                                                                                                                                                                                                                                                                                                                                                                                                                                                                                                                                                                                                                                                                                                                                                                                                                                                                                                                                                                                                                                                                                                                                                                                                                                                                                                                                                                                                                                                                                                                                                                                                                                                                                                                                                                                                                                                                                                                                                                                                                                                                            |      |                                  |     |                                                                                                                                                                                                                                                                                                                                 |      |                                                                                                                                                                                                                                                                                                                                                               |              |                                                                                                                                                                                                                                                                                                                                                                                                                                                                                                                                                                                                                                                                                                                                                                                           |     |                                                                                                                                                                                                                                                                                                                                                                                                                                                                                                    |       |                                                                                                                                                    |                   |                                                                                                                                                                                                                                                                                                                                       |           |                                                                    |                                                                                                                                                                                                                                                                                                                                                                                                                                                               |                                                                                                                                        |
| What                      | Social prescribing scheme<br><br>- needs are discussed during the course of the consultation and referrals or sign-posts are made to organisations which can support those needs<br><br>- majority of support organisations are in the voluntary and community sector or informal support groups, although some referrals are made to statutory organisations                                                                                                                                                                                                                                                                                                                                                                                                                             |                                                                                                                                                                                                                                                                                                                                                                                                                                                                                                                                                                                                                                                                                                                                                                                                                                                                                                                                                       |   |  |      |     |                    |    |        |          |    |           |         |    |                    |   |   |                   |   |   |       |                                                        |    |                                                                                       |                                                                                                                                                                                                                                                                                                                                                                                                                                                                                                                                                                                                                                                                                                                                                                                                                                                                                                                                                                                                                                                                                                                                                                                                                                                                                                                                                                                                                                                                                                                                                                                                                                                                                                                                                                                                                                                                                                                                                                                                                                                                                                                                                                                                                                                                                                                                                                                                                                                                                                                                                                                                                                                                                                                                                                                                                                                                                                                                                                                                            |      |                                  |     |                                                                                                                                                                                                                                                                                                                                 |      |                                                                                                                                                                                                                                                                                                                                                               |              |                                                                                                                                                                                                                                                                                                                                                                                                                                                                                                                                                                                                                                                                                                                                                                                           |     |                                                                                                                                                                                                                                                                                                                                                                                                                                                                                                    |       |                                                                                                                                                    |                   |                                                                                                                                                                                                                                                                                                                                       |           |                                                                    |                                                                                                                                                                                                                                                                                                                                                                                                                                                               |                                                                                                                                        |
| Who provided              | 10 Social Prescribers<br>- 1 Social Prescriber in each of the GP Networks (8 networks, overall 37 GP practices), with an extra part-time Social Prescriber in Networks 1 and 6<br><br>All of the Social Prescribers are required to undertake the following training as part of their contract:<br>- Motivational Interviewing, Making Every Contact Count (MECC), Information Governance, Basic Life Support, Safeguarding<br>Social Prescribers are line managed by the Network Manager in their GP Network. The multi-agency strategic Steering Group oversees service delivery, providing expertise and project management, driving and overseeing service developments, including around data recording, helping to rectify any operational issues and supporting service evaluation |                                                                                                                                                                                                                                                                                                                                                                                                                                                                                                                                                                                                                                                                                                                                                                                                                                                                                                                                                       |   |  |      |     |                    |    |        |          |    |           |         |    |                    |   |   |                   |   |   |       |                                                        |    |                                                                                       |                                                                                                                                                                                                                                                                                                                                                                                                                                                                                                                                                                                                                                                                                                                                                                                                                                                                                                                                                                                                                                                                                                                                                                                                                                                                                                                                                                                                                                                                                                                                                                                                                                                                                                                                                                                                                                                                                                                                                                                                                                                                                                                                                                                                                                                                                                                                                                                                                                                                                                                                                                                                                                                                                                                                                                                                                                                                                                                                                                                                            |      |                                  |     |                                                                                                                                                                                                                                                                                                                                 |      |                                                                                                                                                                                                                                                                                                                                                               |              |                                                                                                                                                                                                                                                                                                                                                                                                                                                                                                                                                                                                                                                                                                                                                                                           |     |                                                                                                                                                                                                                                                                                                                                                                                                                                                                                                    |       |                                                                                                                                                    |                   |                                                                                                                                                                                                                                                                                                                                       |           |                                                                    |                                                                                                                                                                                                                                                                                                                                                                                                                                                               |                                                                                                                                        |
| How                       | Where Social Prescribers have access to EMIS19, referrals generally come via EMIS, otherwise hard copy referral forms are used, self-referrals are also accepted and can be made over the phone, via email, or via reception staff<br><br>- Client consultations are conducted either on the telephone or in face-to-face appointments, depending on need<br><br>- Social Prescribers use a range of motivational interviewing, goal-setting and coaching skills in their discussions with clients                                                                                                                                                                                                                                                                                        |                                                                                                                                                                                                                                                                                                                                                                                                                                                                                                                                                                                                                                                                                                                                                                                                                                                                                                                                                       |   |  |      |     |                    |    |        |          |    |           |         |    |                    |   |   |                   |   |   |       |                                                        |    |                                                                                       |                                                                                                                                                                                                                                                                                                                                                                                                                                                                                                                                                                                                                                                                                                                                                                                                                                                                                                                                                                                                                                                                                                                                                                                                                                                                                                                                                                                                                                                                                                                                                                                                                                                                                                                                                                                                                                                                                                                                                                                                                                                                                                                                                                                                                                                                                                                                                                                                                                                                                                                                                                                                                                                                                                                                                                                                                                                                                                                                                                                                            |      |                                  |     |                                                                                                                                                                                                                                                                                                                                 |      |                                                                                                                                                                                                                                                                                                                                                               |              |                                                                                                                                                                                                                                                                                                                                                                                                                                                                                                                                                                                                                                                                                                                                                                                           |     |                                                                                                                                                                                                                                                                                                                                                                                                                                                                                                    |       |                                                                                                                                                    |                   |                                                                                                                                                                                                                                                                                                                                       |           |                                                                    |                                                                                                                                                                                                                                                                                                                                                                                                                                                               |                                                                                                                                        |
| Where                     | Face-to-face or via telephone, in three Networks, where felt necessary on an individual client basis<br><br>- Social Prescribers offer home visits                                                                                                                                                                                                                                                                                                                                                                                                                                                                                                                                                                                                                                        |                                                                                                                                                                                                                                                                                                                                                                                                                                                                                                                                                                                                                                                                                                                                                                                                                                                                                                                                                       |   |  |      |     |                    |    |        |          |    |           |         |    |                    |   |   |                   |   |   |       |                                                        |    |                                                                                       |                                                                                                                                                                                                                                                                                                                                                                                                                                                                                                                                                                                                                                                                                                                                                                                                                                                                                                                                                                                                                                                                                                                                                                                                                                                                                                                                                                                                                                                                                                                                                                                                                                                                                                                                                                                                                                                                                                                                                                                                                                                                                                                                                                                                                                                                                                                                                                                                                                                                                                                                                                                                                                                                                                                                                                                                                                                                                                                                                                                                            |      |                                  |     |                                                                                                                                                                                                                                                                                                                                 |      |                                                                                                                                                                                                                                                                                                                                                               |              |                                                                                                                                                                                                                                                                                                                                                                                                                                                                                                                                                                                                                                                                                                                                                                                           |     |                                                                                                                                                                                                                                                                                                                                                                                                                                                                                                    |       |                                                                                                                                                    |                   |                                                                                                                                                                                                                                                                                                                                       |           |                                                                    |                                                                                                                                                                                                                                                                                                                                                                                                                                                               |                                                                                                                                        |
| When and How Much         | Each consultation: 30-60 min<br><br>- most Networks place no restriction on the number of consultations a client may have with a Social Prescriber, but two apply a guide to the maximum number, ranging from 4 to 6<br><br>- in five of the Networks, in exceptional circumstances, Social Prescribers accompany clients to services                                                                                                                                                                                                                                                                                                                                                                                                                                                     |                                                                                                                                                                                                                                                                                                                                                                                                                                                                                                                                                                                                                                                                                                                                                                                                                                                                                                                                                       |   |  |      |     |                    |    |        |          |    |           |         |    |                    |   |   |                   |   |   |       |                                                        |    |                                                                                       |                                                                                                                                                                                                                                                                                                                                                                                                                                                                                                                                                                                                                                                                                                                                                                                                                                                                                                                                                                                                                                                                                                                                                                                                                                                                                                                                                                                                                                                                                                                                                                                                                                                                                                                                                                                                                                                                                                                                                                                                                                                                                                                                                                                                                                                                                                                                                                                                                                                                                                                                                                                                                                                                                                                                                                                                                                                                                                                                                                                                            |      |                                  |     |                                                                                                                                                                                                                                                                                                                                 |      |                                                                                                                                                                                                                                                                                                                                                               |              |                                                                                                                                                                                                                                                                                                                                                                                                                                                                                                                                                                                                                                                                                                                                                                                           |     |                                                                                                                                                                                                                                                                                                                                                                                                                                                                                                    |       |                                                                                                                                                    |                   |                                                                                                                                                                                                                                                                                                                                       |           |                                                                    |                                                                                                                                                                                                                                                                                                                                                                                                                                                               |                                                                                                                                        |
| Tailoring                 | Referral process differs slightly across the different GP Networks                                                                                                                                                                                                                                                                                                                                                                                                                                                                                                                                                                                                                                                                                                                        |                                                                                                                                                                                                                                                                                                                                                                                                                                                                                                                                                                                                                                                                                                                                                                                                                                                                                                                                                       |   |  |      |     |                    |    |        |          |    |           |         |    |                    |   |   |                   |   |   |       |                                                        |    |                                                                                       |                                                                                                                                                                                                                                                                                                                                                                                                                                                                                                                                                                                                                                                                                                                                                                                                                                                                                                                                                                                                                                                                                                                                                                                                                                                                                                                                                                                                                                                                                                                                                                                                                                                                                                                                                                                                                                                                                                                                                                                                                                                                                                                                                                                                                                                                                                                                                                                                                                                                                                                                                                                                                                                                                                                                                                                                                                                                                                                                                                                                            |      |                                  |     |                                                                                                                                                                                                                                                                                                                                 |      |                                                                                                                                                                                                                                                                                                                                                               |              |                                                                                                                                                                                                                                                                                                                                                                                                                                                                                                                                                                                                                                                                                                                                                                                           |     |                                                                                                                                                                                                                                                                                                                                                                                                                                                                                                    |       |                                                                                                                                                    |                   |                                                                                                                                                                                                                                                                                                                                       |           |                                                                    |                                                                                                                                                                                                                                                                                                                                                                                                                                                               |                                                                                                                                        |

|                    |                                                                                                                                                                                                                                                                                                                                               |                                                                                                                                                                                                                                                                                                                                                                                                                                                                                                                                                                                                                                                                                                                                                                                                                                                                                                                                                                                                                                                                                                                       |   |  |     |     |                        |    |        |                          |      |           |   |   |                    |   |   |                   |   |   |       |   |   |                                                            |                                                                                                                                                                                                                                                                                                                                                                                                                                                                                                                                                                                                                                                                                                                                                                                                                                                                                                                                                                                                                                                                                                                                                  |      |                                  |     |                                                                                                                                            |      |                                                                                                                                                                                                                                                                                                                                               |              |             |     |                                                                           |       |                               |                   |                          |           |                                                                            |                                                                                                                                                                                                                                      |                                                                                                                                      |
|--------------------|-----------------------------------------------------------------------------------------------------------------------------------------------------------------------------------------------------------------------------------------------------------------------------------------------------------------------------------------------|-----------------------------------------------------------------------------------------------------------------------------------------------------------------------------------------------------------------------------------------------------------------------------------------------------------------------------------------------------------------------------------------------------------------------------------------------------------------------------------------------------------------------------------------------------------------------------------------------------------------------------------------------------------------------------------------------------------------------------------------------------------------------------------------------------------------------------------------------------------------------------------------------------------------------------------------------------------------------------------------------------------------------------------------------------------------------------------------------------------------------|---|--|-----|-----|------------------------|----|--------|--------------------------|------|-----------|---|---|--------------------|---|---|-------------------|---|---|-------|---|---|------------------------------------------------------------|--------------------------------------------------------------------------------------------------------------------------------------------------------------------------------------------------------------------------------------------------------------------------------------------------------------------------------------------------------------------------------------------------------------------------------------------------------------------------------------------------------------------------------------------------------------------------------------------------------------------------------------------------------------------------------------------------------------------------------------------------------------------------------------------------------------------------------------------------------------------------------------------------------------------------------------------------------------------------------------------------------------------------------------------------------------------------------------------------------------------------------------------------|------|----------------------------------|-----|--------------------------------------------------------------------------------------------------------------------------------------------|------|-----------------------------------------------------------------------------------------------------------------------------------------------------------------------------------------------------------------------------------------------------------------------------------------------------------------------------------------------|--------------|-------------|-----|---------------------------------------------------------------------------|-------|-------------------------------|-------------------|--------------------------|-----------|----------------------------------------------------------------------------|--------------------------------------------------------------------------------------------------------------------------------------------------------------------------------------------------------------------------------------|--------------------------------------------------------------------------------------------------------------------------------------|
| Friedli 2012 (63)  | <p>Uncontrolled before-and-after study, mixed methods</p> <p>Study length: 16 months</p>                                                                                                                                                                                                                                                      | <p><b>Inclusion criteria:</b></p> <ul style="list-style-type: none"> <li>- Poor mental wellbeing affected by their social circumstances e.g. socially isolated, recently bereaved, lone parents, low income</li> <li>- Mild to moderate depression and anxiety</li> <li>- Long term physical/mental conditions</li> <li>- Frequent attenders in primary care</li> </ul> <p><b>Exclusion criteria:</b></p> <ul style="list-style-type: none"> <li>- People experiencing acute episodes of psychosis.</li> <li>- People with issues of drug or alcohol misuse.</li> </ul> <p>Baseline characteristics:</p> <table border="1" data-bbox="477 604 1071 974"> <tr> <td>N</td> <td></td> <td>123</td> </tr> <tr> <td>Age</td> <td>Median (Fully engaged)</td> <td>44</td> </tr> <tr> <td>Gender</td> <td>Female % (Fully Engaged)</td> <td>57.4</td> </tr> <tr> <td>Ethnicity</td> <td>-</td> <td>-</td> </tr> <tr> <td>Living arrangement</td> <td>-</td> <td>-</td> </tr> <tr> <td>Employment status</td> <td>-</td> <td>-</td> </tr> <tr> <td>other</td> <td>-</td> <td>-</td> </tr> </table> <p>Population: General</p> | N |  | 123 | Age | Median (Fully engaged) | 44 | Gender | Female % (Fully Engaged) | 57.4 | Ethnicity | - | - | Living arrangement | - | - | Employment status | - | - | other | - | - | <p>Primary Care</p> <p>Country (UK, Dundee, Maryfield)</p> | <table border="1" data-bbox="1305 226 2237 827"> <tr> <td>Name</td> <td>Equally well: Sources of Support</td> </tr> <tr> <td>Why</td> <td>Adressing the high economic, social health burden imposed by mental illness and the corresponding requirement to improve mental wellbeing.</td> </tr> <tr> <td>What</td> <td>Social prescribing scheme, referrals by GPs, initial consultation aimed at exploring the psychosocial needs of patients. Depending on patient need, link workers facilitate access to a range of local sources of support, activities and opportunities in the community. Appropriate referral, engagement, signposting and supported access.</td> </tr> <tr> <td>Who provided</td> <td>Link worker</td> </tr> <tr> <td>How</td> <td>Contacted patient to arrange an initial consultation after referral by GP</td> </tr> <tr> <td>Where</td> <td>Face-to-face or via telephone</td> </tr> <tr> <td>When and How Much</td> <td>Up to four consultations</td> </tr> <tr> <td>Tailoring</td> <td>Depending in complexity of social and support needs and levels of distress</td> </tr> </table> <p>Intervention: Medium</p> | Name | Equally well: Sources of Support | Why | Adressing the high economic, social health burden imposed by mental illness and the corresponding requirement to improve mental wellbeing. | What | Social prescribing scheme, referrals by GPs, initial consultation aimed at exploring the psychosocial needs of patients. Depending on patient need, link workers facilitate access to a range of local sources of support, activities and opportunities in the community. Appropriate referral, engagement, signposting and supported access. | Who provided | Link worker | How | Contacted patient to arrange an initial consultation after referral by GP | Where | Face-to-face or via telephone | When and How Much | Up to four consultations | Tailoring | Depending in complexity of social and support needs and levels of distress | <p>Patient outcomes at baseline and post intervention (unknown time-frame:</p> <ul style="list-style-type: none"> <li>- Warwick Edinburgh Mental Well-being Scale (WEMBWS)</li> <li>- Work Social Adjustment Scale (WSAS)</li> </ul> | <p>Peer-Review: No</p> <p>Funding sources: Dundee Healthy Living Initiative (DHLI)</p> <p>Declaration of interest: not mentioned</p> |
| N                  |                                                                                                                                                                                                                                                                                                                                               | 123                                                                                                                                                                                                                                                                                                                                                                                                                                                                                                                                                                                                                                                                                                                                                                                                                                                                                                                                                                                                                                                                                                                   |   |  |     |     |                        |    |        |                          |      |           |   |   |                    |   |   |                   |   |   |       |   |   |                                                            |                                                                                                                                                                                                                                                                                                                                                                                                                                                                                                                                                                                                                                                                                                                                                                                                                                                                                                                                                                                                                                                                                                                                                  |      |                                  |     |                                                                                                                                            |      |                                                                                                                                                                                                                                                                                                                                               |              |             |     |                                                                           |       |                               |                   |                          |           |                                                                            |                                                                                                                                                                                                                                      |                                                                                                                                      |
| Age                | Median (Fully engaged)                                                                                                                                                                                                                                                                                                                        | 44                                                                                                                                                                                                                                                                                                                                                                                                                                                                                                                                                                                                                                                                                                                                                                                                                                                                                                                                                                                                                                                                                                                    |   |  |     |     |                        |    |        |                          |      |           |   |   |                    |   |   |                   |   |   |       |   |   |                                                            |                                                                                                                                                                                                                                                                                                                                                                                                                                                                                                                                                                                                                                                                                                                                                                                                                                                                                                                                                                                                                                                                                                                                                  |      |                                  |     |                                                                                                                                            |      |                                                                                                                                                                                                                                                                                                                                               |              |             |     |                                                                           |       |                               |                   |                          |           |                                                                            |                                                                                                                                                                                                                                      |                                                                                                                                      |
| Gender             | Female % (Fully Engaged)                                                                                                                                                                                                                                                                                                                      | 57.4                                                                                                                                                                                                                                                                                                                                                                                                                                                                                                                                                                                                                                                                                                                                                                                                                                                                                                                                                                                                                                                                                                                  |   |  |     |     |                        |    |        |                          |      |           |   |   |                    |   |   |                   |   |   |       |   |   |                                                            |                                                                                                                                                                                                                                                                                                                                                                                                                                                                                                                                                                                                                                                                                                                                                                                                                                                                                                                                                                                                                                                                                                                                                  |      |                                  |     |                                                                                                                                            |      |                                                                                                                                                                                                                                                                                                                                               |              |             |     |                                                                           |       |                               |                   |                          |           |                                                                            |                                                                                                                                                                                                                                      |                                                                                                                                      |
| Ethnicity          | -                                                                                                                                                                                                                                                                                                                                             | -                                                                                                                                                                                                                                                                                                                                                                                                                                                                                                                                                                                                                                                                                                                                                                                                                                                                                                                                                                                                                                                                                                                     |   |  |     |     |                        |    |        |                          |      |           |   |   |                    |   |   |                   |   |   |       |   |   |                                                            |                                                                                                                                                                                                                                                                                                                                                                                                                                                                                                                                                                                                                                                                                                                                                                                                                                                                                                                                                                                                                                                                                                                                                  |      |                                  |     |                                                                                                                                            |      |                                                                                                                                                                                                                                                                                                                                               |              |             |     |                                                                           |       |                               |                   |                          |           |                                                                            |                                                                                                                                                                                                                                      |                                                                                                                                      |
| Living arrangement | -                                                                                                                                                                                                                                                                                                                                             | -                                                                                                                                                                                                                                                                                                                                                                                                                                                                                                                                                                                                                                                                                                                                                                                                                                                                                                                                                                                                                                                                                                                     |   |  |     |     |                        |    |        |                          |      |           |   |   |                    |   |   |                   |   |   |       |   |   |                                                            |                                                                                                                                                                                                                                                                                                                                                                                                                                                                                                                                                                                                                                                                                                                                                                                                                                                                                                                                                                                                                                                                                                                                                  |      |                                  |     |                                                                                                                                            |      |                                                                                                                                                                                                                                                                                                                                               |              |             |     |                                                                           |       |                               |                   |                          |           |                                                                            |                                                                                                                                                                                                                                      |                                                                                                                                      |
| Employment status  | -                                                                                                                                                                                                                                                                                                                                             | -                                                                                                                                                                                                                                                                                                                                                                                                                                                                                                                                                                                                                                                                                                                                                                                                                                                                                                                                                                                                                                                                                                                     |   |  |     |     |                        |    |        |                          |      |           |   |   |                    |   |   |                   |   |   |       |   |   |                                                            |                                                                                                                                                                                                                                                                                                                                                                                                                                                                                                                                                                                                                                                                                                                                                                                                                                                                                                                                                                                                                                                                                                                                                  |      |                                  |     |                                                                                                                                            |      |                                                                                                                                                                                                                                                                                                                                               |              |             |     |                                                                           |       |                               |                   |                          |           |                                                                            |                                                                                                                                                                                                                                      |                                                                                                                                      |
| other              | -                                                                                                                                                                                                                                                                                                                                             | -                                                                                                                                                                                                                                                                                                                                                                                                                                                                                                                                                                                                                                                                                                                                                                                                                                                                                                                                                                                                                                                                                                                     |   |  |     |     |                        |    |        |                          |      |           |   |   |                    |   |   |                   |   |   |       |   |   |                                                            |                                                                                                                                                                                                                                                                                                                                                                                                                                                                                                                                                                                                                                                                                                                                                                                                                                                                                                                                                                                                                                                                                                                                                  |      |                                  |     |                                                                                                                                            |      |                                                                                                                                                                                                                                                                                                                                               |              |             |     |                                                                           |       |                               |                   |                          |           |                                                                            |                                                                                                                                                                                                                                      |                                                                                                                                      |
| Name               | Equally well: Sources of Support                                                                                                                                                                                                                                                                                                              |                                                                                                                                                                                                                                                                                                                                                                                                                                                                                                                                                                                                                                                                                                                                                                                                                                                                                                                                                                                                                                                                                                                       |   |  |     |     |                        |    |        |                          |      |           |   |   |                    |   |   |                   |   |   |       |   |   |                                                            |                                                                                                                                                                                                                                                                                                                                                                                                                                                                                                                                                                                                                                                                                                                                                                                                                                                                                                                                                                                                                                                                                                                                                  |      |                                  |     |                                                                                                                                            |      |                                                                                                                                                                                                                                                                                                                                               |              |             |     |                                                                           |       |                               |                   |                          |           |                                                                            |                                                                                                                                                                                                                                      |                                                                                                                                      |
| Why                | Adressing the high economic, social health burden imposed by mental illness and the corresponding requirement to improve mental wellbeing.                                                                                                                                                                                                    |                                                                                                                                                                                                                                                                                                                                                                                                                                                                                                                                                                                                                                                                                                                                                                                                                                                                                                                                                                                                                                                                                                                       |   |  |     |     |                        |    |        |                          |      |           |   |   |                    |   |   |                   |   |   |       |   |   |                                                            |                                                                                                                                                                                                                                                                                                                                                                                                                                                                                                                                                                                                                                                                                                                                                                                                                                                                                                                                                                                                                                                                                                                                                  |      |                                  |     |                                                                                                                                            |      |                                                                                                                                                                                                                                                                                                                                               |              |             |     |                                                                           |       |                               |                   |                          |           |                                                                            |                                                                                                                                                                                                                                      |                                                                                                                                      |
| What               | Social prescribing scheme, referrals by GPs, initial consultation aimed at exploring the psychosocial needs of patients. Depending on patient need, link workers facilitate access to a range of local sources of support, activities and opportunities in the community. Appropriate referral, engagement, signposting and supported access. |                                                                                                                                                                                                                                                                                                                                                                                                                                                                                                                                                                                                                                                                                                                                                                                                                                                                                                                                                                                                                                                                                                                       |   |  |     |     |                        |    |        |                          |      |           |   |   |                    |   |   |                   |   |   |       |   |   |                                                            |                                                                                                                                                                                                                                                                                                                                                                                                                                                                                                                                                                                                                                                                                                                                                                                                                                                                                                                                                                                                                                                                                                                                                  |      |                                  |     |                                                                                                                                            |      |                                                                                                                                                                                                                                                                                                                                               |              |             |     |                                                                           |       |                               |                   |                          |           |                                                                            |                                                                                                                                                                                                                                      |                                                                                                                                      |
| Who provided       | Link worker                                                                                                                                                                                                                                                                                                                                   |                                                                                                                                                                                                                                                                                                                                                                                                                                                                                                                                                                                                                                                                                                                                                                                                                                                                                                                                                                                                                                                                                                                       |   |  |     |     |                        |    |        |                          |      |           |   |   |                    |   |   |                   |   |   |       |   |   |                                                            |                                                                                                                                                                                                                                                                                                                                                                                                                                                                                                                                                                                                                                                                                                                                                                                                                                                                                                                                                                                                                                                                                                                                                  |      |                                  |     |                                                                                                                                            |      |                                                                                                                                                                                                                                                                                                                                               |              |             |     |                                                                           |       |                               |                   |                          |           |                                                                            |                                                                                                                                                                                                                                      |                                                                                                                                      |
| How                | Contacted patient to arrange an initial consultation after referral by GP                                                                                                                                                                                                                                                                     |                                                                                                                                                                                                                                                                                                                                                                                                                                                                                                                                                                                                                                                                                                                                                                                                                                                                                                                                                                                                                                                                                                                       |   |  |     |     |                        |    |        |                          |      |           |   |   |                    |   |   |                   |   |   |       |   |   |                                                            |                                                                                                                                                                                                                                                                                                                                                                                                                                                                                                                                                                                                                                                                                                                                                                                                                                                                                                                                                                                                                                                                                                                                                  |      |                                  |     |                                                                                                                                            |      |                                                                                                                                                                                                                                                                                                                                               |              |             |     |                                                                           |       |                               |                   |                          |           |                                                                            |                                                                                                                                                                                                                                      |                                                                                                                                      |
| Where              | Face-to-face or via telephone                                                                                                                                                                                                                                                                                                                 |                                                                                                                                                                                                                                                                                                                                                                                                                                                                                                                                                                                                                                                                                                                                                                                                                                                                                                                                                                                                                                                                                                                       |   |  |     |     |                        |    |        |                          |      |           |   |   |                    |   |   |                   |   |   |       |   |   |                                                            |                                                                                                                                                                                                                                                                                                                                                                                                                                                                                                                                                                                                                                                                                                                                                                                                                                                                                                                                                                                                                                                                                                                                                  |      |                                  |     |                                                                                                                                            |      |                                                                                                                                                                                                                                                                                                                                               |              |             |     |                                                                           |       |                               |                   |                          |           |                                                                            |                                                                                                                                                                                                                                      |                                                                                                                                      |
| When and How Much  | Up to four consultations                                                                                                                                                                                                                                                                                                                      |                                                                                                                                                                                                                                                                                                                                                                                                                                                                                                                                                                                                                                                                                                                                                                                                                                                                                                                                                                                                                                                                                                                       |   |  |     |     |                        |    |        |                          |      |           |   |   |                    |   |   |                   |   |   |       |   |   |                                                            |                                                                                                                                                                                                                                                                                                                                                                                                                                                                                                                                                                                                                                                                                                                                                                                                                                                                                                                                                                                                                                                                                                                                                  |      |                                  |     |                                                                                                                                            |      |                                                                                                                                                                                                                                                                                                                                               |              |             |     |                                                                           |       |                               |                   |                          |           |                                                                            |                                                                                                                                                                                                                                      |                                                                                                                                      |
| Tailoring          | Depending in complexity of social and support needs and levels of distress                                                                                                                                                                                                                                                                    |                                                                                                                                                                                                                                                                                                                                                                                                                                                                                                                                                                                                                                                                                                                                                                                                                                                                                                                                                                                                                                                                                                                       |   |  |     |     |                        |    |        |                          |      |           |   |   |                    |   |   |                   |   |   |       |   |   |                                                            |                                                                                                                                                                                                                                                                                                                                                                                                                                                                                                                                                                                                                                                                                                                                                                                                                                                                                                                                                                                                                                                                                                                                                  |      |                                  |     |                                                                                                                                            |      |                                                                                                                                                                                                                                                                                                                                               |              |             |     |                                                                           |       |                               |                   |                          |           |                                                                            |                                                                                                                                                                                                                                      |                                                                                                                                      |

| <p>Foster 2020 (64,65)</p> <p>Uncontrolled before-and-after study, mixed-methods</p> <p>Study length: 32 months</p> | <p><b>Inclusion criteria:</b></p> <p>18 years or older, there was no specific eligibility criteria in relation to loneliness, although the service did target specific population groups (called trigger groups) including young parents, individuals with health and/or mobility issues and people recently bereaved, retired or had children leaving home.</p> <p><b>Exclusion criteria:</b> -</p> <p>Baseline characteristics:</p> <table border="1" data-bbox="477 457 854 783"> <tr> <td>N</td> <td></td> <td>10643</td> </tr> <tr> <td>Age</td> <td>Mean (SD)</td> <td>65.5 (19.3)</td> </tr> <tr> <td>Gender</td> <td>Female %</td> <td>65.8</td> </tr> <tr> <td>Ethnicity</td> <td>White British %</td> <td>70.2</td> </tr> <tr> <td>Living arrangement</td> <td>Living alone %</td> <td>65.4</td> </tr> <tr> <td>Employment status</td> <td></td> <td>-</td> </tr> <tr> <td>Other</td> <td>Health issues %</td> <td>49.3</td> </tr> </table> <p>Population: General</p>                                                           | N                                                      |                 | 10643 | Age | Mean (SD) | 65.5 (19.3) | Gender | Female % | 65.8 | Ethnicity | White British % | 70.2            | Living arrangement | Living alone % | 65.4 | Employment status |           | - | Other | Health issues % | 49.3               | <p>Primary Care, Secondary Care</p> <p>Country: UK</p> | <table border="1" data-bbox="1299 222 2237 625"> <tr> <td>Name</td> <td>Social prescribing service</td> </tr> <tr> <td>Why</td> <td>Reduce people's loneliness</td> </tr> <tr> <td>What</td> <td>Delivering personalised support, developing a supportive relationship with service-users, assessing their needs and providing person-tailored care, focused on developing service-users' confidence so they felt able to socialise and to facilitate access to appropriate community activities and services (signposting) such as craft groups, adult learning and leisure facilities. While link workers primarily delivered support, volunteers were also recruited to increase service capacity. For example, a link worker may undertake a service-user's initial assessment and then a volunteer accompanies them to a community activity.</td> </tr> <tr> <td>Who provided</td> <td>Skilled, paid link workers alongside volunteers</td> </tr> <tr> <td>How</td> <td>Face-to-face</td> </tr> <tr> <td>Where</td> <td>Across 37 different sites throughout the UK</td> </tr> <tr> <td>When and How Much</td> <td>Up to 12 weeks</td> </tr> <tr> <td>Tailoring</td> <td>Personalized</td> </tr> </table> <p>Intervention: Holistic</p> | Name | Social prescribing service | Why                                     | Reduce people's loneliness | What | Delivering personalised support, developing a supportive relationship with service-users, assessing their needs and providing person-tailored care, focused on developing service-users' confidence so they felt able to socialise and to facilitate access to appropriate community activities and services (signposting) such as craft groups, adult learning and leisure facilities. While link workers primarily delivered support, volunteers were also recruited to increase service capacity. For example, a link worker may undertake a service-user's initial assessment and then a volunteer accompanies them to a community activity. | Who provided                                                                                                                                                                                                                                                                                                                                                                                                                                                                                                                                                                                                                                                                                                                                                                                                                                                                                                                                                                                                                                                                                                                                                                                                                                                                                                                                                                                                                                                                                                                                             | Skilled, paid link workers alongside volunteers | How                           | Face-to-face                         | Where | Across 37 different sites throughout the UK                                                                                                                                                                                                                       | When and How Much                                      | Up to 12 weeks | Tailoring                                                                                                                                                                                        | Personalized | <p>Patient outcomes at baseline, 12-week endpoint and 3-month follow-up via questionnaire:</p> <ul style="list-style-type: none"> <li>- UCLA Loneliness Scale</li> </ul> <p>Process of care measures:</p> <ul style="list-style-type: none"> <li>- Economic evaluation*</li> <li>- SROI analysis*</li> </ul> | <p>Peer-Review: partly (1/2)</p> <p>Funding source: Co-op and British Red Cross charity partnership</p> <p>Declaration of interest: none declared</p> |                       |     |                                                                                                                                                                                                                                  |  |       |  |  |                   |                                               |  |           |  |  |               |  |  |                                                                                                                                                                                                                                                                                                                                                                                                                                                                                                                                                                                                                                                                                                                                                                                                                                                                                                                                                                                                        |                                                                                                                    |
|---------------------------------------------------------------------------------------------------------------------|--------------------------------------------------------------------------------------------------------------------------------------------------------------------------------------------------------------------------------------------------------------------------------------------------------------------------------------------------------------------------------------------------------------------------------------------------------------------------------------------------------------------------------------------------------------------------------------------------------------------------------------------------------------------------------------------------------------------------------------------------------------------------------------------------------------------------------------------------------------------------------------------------------------------------------------------------------------------------------------------------------------------------------------------|--------------------------------------------------------|-----------------|-------|-----|-----------|-------------|--------|----------|------|-----------|-----------------|-----------------|--------------------|----------------|------|-------------------|-----------|---|-------|-----------------|--------------------|--------------------------------------------------------|----------------------------------------------------------------------------------------------------------------------------------------------------------------------------------------------------------------------------------------------------------------------------------------------------------------------------------------------------------------------------------------------------------------------------------------------------------------------------------------------------------------------------------------------------------------------------------------------------------------------------------------------------------------------------------------------------------------------------------------------------------------------------------------------------------------------------------------------------------------------------------------------------------------------------------------------------------------------------------------------------------------------------------------------------------------------------------------------------------------------------------------------------------------------------------------------------------------------------------------------|------|----------------------------|-----------------------------------------|----------------------------|------|--------------------------------------------------------------------------------------------------------------------------------------------------------------------------------------------------------------------------------------------------------------------------------------------------------------------------------------------------------------------------------------------------------------------------------------------------------------------------------------------------------------------------------------------------------------------------------------------------------------------------------------------------|----------------------------------------------------------------------------------------------------------------------------------------------------------------------------------------------------------------------------------------------------------------------------------------------------------------------------------------------------------------------------------------------------------------------------------------------------------------------------------------------------------------------------------------------------------------------------------------------------------------------------------------------------------------------------------------------------------------------------------------------------------------------------------------------------------------------------------------------------------------------------------------------------------------------------------------------------------------------------------------------------------------------------------------------------------------------------------------------------------------------------------------------------------------------------------------------------------------------------------------------------------------------------------------------------------------------------------------------------------------------------------------------------------------------------------------------------------------------------------------------------------------------------------------------------------|-------------------------------------------------|-------------------------------|--------------------------------------|-------|-------------------------------------------------------------------------------------------------------------------------------------------------------------------------------------------------------------------------------------------------------------------|--------------------------------------------------------|----------------|--------------------------------------------------------------------------------------------------------------------------------------------------------------------------------------------------|--------------|--------------------------------------------------------------------------------------------------------------------------------------------------------------------------------------------------------------------------------------------------------------------------------------------------------------|-------------------------------------------------------------------------------------------------------------------------------------------------------|-----------------------|-----|----------------------------------------------------------------------------------------------------------------------------------------------------------------------------------------------------------------------------------|--|-------|--|--|-------------------|-----------------------------------------------|--|-----------|--|--|---------------|--|--|--------------------------------------------------------------------------------------------------------------------------------------------------------------------------------------------------------------------------------------------------------------------------------------------------------------------------------------------------------------------------------------------------------------------------------------------------------------------------------------------------------------------------------------------------------------------------------------------------------------------------------------------------------------------------------------------------------------------------------------------------------------------------------------------------------------------------------------------------------------------------------------------------------------------------------------------------------------------------------------------------------|--------------------------------------------------------------------------------------------------------------------|
| N                                                                                                                   |                                                                                                                                                                                                                                                                                                                                                                                                                                                                                                                                                                                                                                                                                                                                                                                                                                                                                                                                                                                                                                            | 10643                                                  |                 |       |     |           |             |        |          |      |           |                 |                 |                    |                |      |                   |           |   |       |                 |                    |                                                        |                                                                                                                                                                                                                                                                                                                                                                                                                                                                                                                                                                                                                                                                                                                                                                                                                                                                                                                                                                                                                                                                                                                                                                                                                                              |      |                            |                                         |                            |      |                                                                                                                                                                                                                                                                                                                                                                                                                                                                                                                                                                                                                                                  |                                                                                                                                                                                                                                                                                                                                                                                                                                                                                                                                                                                                                                                                                                                                                                                                                                                                                                                                                                                                                                                                                                                                                                                                                                                                                                                                                                                                                                                                                                                                                          |                                                 |                               |                                      |       |                                                                                                                                                                                                                                                                   |                                                        |                |                                                                                                                                                                                                  |              |                                                                                                                                                                                                                                                                                                              |                                                                                                                                                       |                       |     |                                                                                                                                                                                                                                  |  |       |  |  |                   |                                               |  |           |  |  |               |  |  |                                                                                                                                                                                                                                                                                                                                                                                                                                                                                                                                                                                                                                                                                                                                                                                                                                                                                                                                                                                                        |                                                                                                                    |
| Age                                                                                                                 | Mean (SD)                                                                                                                                                                                                                                                                                                                                                                                                                                                                                                                                                                                                                                                                                                                                                                                                                                                                                                                                                                                                                                  | 65.5 (19.3)                                            |                 |       |     |           |             |        |          |      |           |                 |                 |                    |                |      |                   |           |   |       |                 |                    |                                                        |                                                                                                                                                                                                                                                                                                                                                                                                                                                                                                                                                                                                                                                                                                                                                                                                                                                                                                                                                                                                                                                                                                                                                                                                                                              |      |                            |                                         |                            |      |                                                                                                                                                                                                                                                                                                                                                                                                                                                                                                                                                                                                                                                  |                                                                                                                                                                                                                                                                                                                                                                                                                                                                                                                                                                                                                                                                                                                                                                                                                                                                                                                                                                                                                                                                                                                                                                                                                                                                                                                                                                                                                                                                                                                                                          |                                                 |                               |                                      |       |                                                                                                                                                                                                                                                                   |                                                        |                |                                                                                                                                                                                                  |              |                                                                                                                                                                                                                                                                                                              |                                                                                                                                                       |                       |     |                                                                                                                                                                                                                                  |  |       |  |  |                   |                                               |  |           |  |  |               |  |  |                                                                                                                                                                                                                                                                                                                                                                                                                                                                                                                                                                                                                                                                                                                                                                                                                                                                                                                                                                                                        |                                                                                                                    |
| Gender                                                                                                              | Female %                                                                                                                                                                                                                                                                                                                                                                                                                                                                                                                                                                                                                                                                                                                                                                                                                                                                                                                                                                                                                                   | 65.8                                                   |                 |       |     |           |             |        |          |      |           |                 |                 |                    |                |      |                   |           |   |       |                 |                    |                                                        |                                                                                                                                                                                                                                                                                                                                                                                                                                                                                                                                                                                                                                                                                                                                                                                                                                                                                                                                                                                                                                                                                                                                                                                                                                              |      |                            |                                         |                            |      |                                                                                                                                                                                                                                                                                                                                                                                                                                                                                                                                                                                                                                                  |                                                                                                                                                                                                                                                                                                                                                                                                                                                                                                                                                                                                                                                                                                                                                                                                                                                                                                                                                                                                                                                                                                                                                                                                                                                                                                                                                                                                                                                                                                                                                          |                                                 |                               |                                      |       |                                                                                                                                                                                                                                                                   |                                                        |                |                                                                                                                                                                                                  |              |                                                                                                                                                                                                                                                                                                              |                                                                                                                                                       |                       |     |                                                                                                                                                                                                                                  |  |       |  |  |                   |                                               |  |           |  |  |               |  |  |                                                                                                                                                                                                                                                                                                                                                                                                                                                                                                                                                                                                                                                                                                                                                                                                                                                                                                                                                                                                        |                                                                                                                    |
| Ethnicity                                                                                                           | White British %                                                                                                                                                                                                                                                                                                                                                                                                                                                                                                                                                                                                                                                                                                                                                                                                                                                                                                                                                                                                                            | 70.2                                                   |                 |       |     |           |             |        |          |      |           |                 |                 |                    |                |      |                   |           |   |       |                 |                    |                                                        |                                                                                                                                                                                                                                                                                                                                                                                                                                                                                                                                                                                                                                                                                                                                                                                                                                                                                                                                                                                                                                                                                                                                                                                                                                              |      |                            |                                         |                            |      |                                                                                                                                                                                                                                                                                                                                                                                                                                                                                                                                                                                                                                                  |                                                                                                                                                                                                                                                                                                                                                                                                                                                                                                                                                                                                                                                                                                                                                                                                                                                                                                                                                                                                                                                                                                                                                                                                                                                                                                                                                                                                                                                                                                                                                          |                                                 |                               |                                      |       |                                                                                                                                                                                                                                                                   |                                                        |                |                                                                                                                                                                                                  |              |                                                                                                                                                                                                                                                                                                              |                                                                                                                                                       |                       |     |                                                                                                                                                                                                                                  |  |       |  |  |                   |                                               |  |           |  |  |               |  |  |                                                                                                                                                                                                                                                                                                                                                                                                                                                                                                                                                                                                                                                                                                                                                                                                                                                                                                                                                                                                        |                                                                                                                    |
| Living arrangement                                                                                                  | Living alone %                                                                                                                                                                                                                                                                                                                                                                                                                                                                                                                                                                                                                                                                                                                                                                                                                                                                                                                                                                                                                             | 65.4                                                   |                 |       |     |           |             |        |          |      |           |                 |                 |                    |                |      |                   |           |   |       |                 |                    |                                                        |                                                                                                                                                                                                                                                                                                                                                                                                                                                                                                                                                                                                                                                                                                                                                                                                                                                                                                                                                                                                                                                                                                                                                                                                                                              |      |                            |                                         |                            |      |                                                                                                                                                                                                                                                                                                                                                                                                                                                                                                                                                                                                                                                  |                                                                                                                                                                                                                                                                                                                                                                                                                                                                                                                                                                                                                                                                                                                                                                                                                                                                                                                                                                                                                                                                                                                                                                                                                                                                                                                                                                                                                                                                                                                                                          |                                                 |                               |                                      |       |                                                                                                                                                                                                                                                                   |                                                        |                |                                                                                                                                                                                                  |              |                                                                                                                                                                                                                                                                                                              |                                                                                                                                                       |                       |     |                                                                                                                                                                                                                                  |  |       |  |  |                   |                                               |  |           |  |  |               |  |  |                                                                                                                                                                                                                                                                                                                                                                                                                                                                                                                                                                                                                                                                                                                                                                                                                                                                                                                                                                                                        |                                                                                                                    |
| Employment status                                                                                                   |                                                                                                                                                                                                                                                                                                                                                                                                                                                                                                                                                                                                                                                                                                                                                                                                                                                                                                                                                                                                                                            | -                                                      |                 |       |     |           |             |        |          |      |           |                 |                 |                    |                |      |                   |           |   |       |                 |                    |                                                        |                                                                                                                                                                                                                                                                                                                                                                                                                                                                                                                                                                                                                                                                                                                                                                                                                                                                                                                                                                                                                                                                                                                                                                                                                                              |      |                            |                                         |                            |      |                                                                                                                                                                                                                                                                                                                                                                                                                                                                                                                                                                                                                                                  |                                                                                                                                                                                                                                                                                                                                                                                                                                                                                                                                                                                                                                                                                                                                                                                                                                                                                                                                                                                                                                                                                                                                                                                                                                                                                                                                                                                                                                                                                                                                                          |                                                 |                               |                                      |       |                                                                                                                                                                                                                                                                   |                                                        |                |                                                                                                                                                                                                  |              |                                                                                                                                                                                                                                                                                                              |                                                                                                                                                       |                       |     |                                                                                                                                                                                                                                  |  |       |  |  |                   |                                               |  |           |  |  |               |  |  |                                                                                                                                                                                                                                                                                                                                                                                                                                                                                                                                                                                                                                                                                                                                                                                                                                                                                                                                                                                                        |                                                                                                                    |
| Other                                                                                                               | Health issues %                                                                                                                                                                                                                                                                                                                                                                                                                                                                                                                                                                                                                                                                                                                                                                                                                                                                                                                                                                                                                            | 49.3                                                   |                 |       |     |           |             |        |          |      |           |                 |                 |                    |                |      |                   |           |   |       |                 |                    |                                                        |                                                                                                                                                                                                                                                                                                                                                                                                                                                                                                                                                                                                                                                                                                                                                                                                                                                                                                                                                                                                                                                                                                                                                                                                                                              |      |                            |                                         |                            |      |                                                                                                                                                                                                                                                                                                                                                                                                                                                                                                                                                                                                                                                  |                                                                                                                                                                                                                                                                                                                                                                                                                                                                                                                                                                                                                                                                                                                                                                                                                                                                                                                                                                                                                                                                                                                                                                                                                                                                                                                                                                                                                                                                                                                                                          |                                                 |                               |                                      |       |                                                                                                                                                                                                                                                                   |                                                        |                |                                                                                                                                                                                                  |              |                                                                                                                                                                                                                                                                                                              |                                                                                                                                                       |                       |     |                                                                                                                                                                                                                                  |  |       |  |  |                   |                                               |  |           |  |  |               |  |  |                                                                                                                                                                                                                                                                                                                                                                                                                                                                                                                                                                                                                                                                                                                                                                                                                                                                                                                                                                                                        |                                                                                                                    |
| Name                                                                                                                | Social prescribing service                                                                                                                                                                                                                                                                                                                                                                                                                                                                                                                                                                                                                                                                                                                                                                                                                                                                                                                                                                                                                 |                                                        |                 |       |     |           |             |        |          |      |           |                 |                 |                    |                |      |                   |           |   |       |                 |                    |                                                        |                                                                                                                                                                                                                                                                                                                                                                                                                                                                                                                                                                                                                                                                                                                                                                                                                                                                                                                                                                                                                                                                                                                                                                                                                                              |      |                            |                                         |                            |      |                                                                                                                                                                                                                                                                                                                                                                                                                                                                                                                                                                                                                                                  |                                                                                                                                                                                                                                                                                                                                                                                                                                                                                                                                                                                                                                                                                                                                                                                                                                                                                                                                                                                                                                                                                                                                                                                                                                                                                                                                                                                                                                                                                                                                                          |                                                 |                               |                                      |       |                                                                                                                                                                                                                                                                   |                                                        |                |                                                                                                                                                                                                  |              |                                                                                                                                                                                                                                                                                                              |                                                                                                                                                       |                       |     |                                                                                                                                                                                                                                  |  |       |  |  |                   |                                               |  |           |  |  |               |  |  |                                                                                                                                                                                                                                                                                                                                                                                                                                                                                                                                                                                                                                                                                                                                                                                                                                                                                                                                                                                                        |                                                                                                                    |
| Why                                                                                                                 | Reduce people's loneliness                                                                                                                                                                                                                                                                                                                                                                                                                                                                                                                                                                                                                                                                                                                                                                                                                                                                                                                                                                                                                 |                                                        |                 |       |     |           |             |        |          |      |           |                 |                 |                    |                |      |                   |           |   |       |                 |                    |                                                        |                                                                                                                                                                                                                                                                                                                                                                                                                                                                                                                                                                                                                                                                                                                                                                                                                                                                                                                                                                                                                                                                                                                                                                                                                                              |      |                            |                                         |                            |      |                                                                                                                                                                                                                                                                                                                                                                                                                                                                                                                                                                                                                                                  |                                                                                                                                                                                                                                                                                                                                                                                                                                                                                                                                                                                                                                                                                                                                                                                                                                                                                                                                                                                                                                                                                                                                                                                                                                                                                                                                                                                                                                                                                                                                                          |                                                 |                               |                                      |       |                                                                                                                                                                                                                                                                   |                                                        |                |                                                                                                                                                                                                  |              |                                                                                                                                                                                                                                                                                                              |                                                                                                                                                       |                       |     |                                                                                                                                                                                                                                  |  |       |  |  |                   |                                               |  |           |  |  |               |  |  |                                                                                                                                                                                                                                                                                                                                                                                                                                                                                                                                                                                                                                                                                                                                                                                                                                                                                                                                                                                                        |                                                                                                                    |
| What                                                                                                                | Delivering personalised support, developing a supportive relationship with service-users, assessing their needs and providing person-tailored care, focused on developing service-users' confidence so they felt able to socialise and to facilitate access to appropriate community activities and services (signposting) such as craft groups, adult learning and leisure facilities. While link workers primarily delivered support, volunteers were also recruited to increase service capacity. For example, a link worker may undertake a service-user's initial assessment and then a volunteer accompanies them to a community activity.                                                                                                                                                                                                                                                                                                                                                                                           |                                                        |                 |       |     |           |             |        |          |      |           |                 |                 |                    |                |      |                   |           |   |       |                 |                    |                                                        |                                                                                                                                                                                                                                                                                                                                                                                                                                                                                                                                                                                                                                                                                                                                                                                                                                                                                                                                                                                                                                                                                                                                                                                                                                              |      |                            |                                         |                            |      |                                                                                                                                                                                                                                                                                                                                                                                                                                                                                                                                                                                                                                                  |                                                                                                                                                                                                                                                                                                                                                                                                                                                                                                                                                                                                                                                                                                                                                                                                                                                                                                                                                                                                                                                                                                                                                                                                                                                                                                                                                                                                                                                                                                                                                          |                                                 |                               |                                      |       |                                                                                                                                                                                                                                                                   |                                                        |                |                                                                                                                                                                                                  |              |                                                                                                                                                                                                                                                                                                              |                                                                                                                                                       |                       |     |                                                                                                                                                                                                                                  |  |       |  |  |                   |                                               |  |           |  |  |               |  |  |                                                                                                                                                                                                                                                                                                                                                                                                                                                                                                                                                                                                                                                                                                                                                                                                                                                                                                                                                                                                        |                                                                                                                    |
| Who provided                                                                                                        | Skilled, paid link workers alongside volunteers                                                                                                                                                                                                                                                                                                                                                                                                                                                                                                                                                                                                                                                                                                                                                                                                                                                                                                                                                                                            |                                                        |                 |       |     |           |             |        |          |      |           |                 |                 |                    |                |      |                   |           |   |       |                 |                    |                                                        |                                                                                                                                                                                                                                                                                                                                                                                                                                                                                                                                                                                                                                                                                                                                                                                                                                                                                                                                                                                                                                                                                                                                                                                                                                              |      |                            |                                         |                            |      |                                                                                                                                                                                                                                                                                                                                                                                                                                                                                                                                                                                                                                                  |                                                                                                                                                                                                                                                                                                                                                                                                                                                                                                                                                                                                                                                                                                                                                                                                                                                                                                                                                                                                                                                                                                                                                                                                                                                                                                                                                                                                                                                                                                                                                          |                                                 |                               |                                      |       |                                                                                                                                                                                                                                                                   |                                                        |                |                                                                                                                                                                                                  |              |                                                                                                                                                                                                                                                                                                              |                                                                                                                                                       |                       |     |                                                                                                                                                                                                                                  |  |       |  |  |                   |                                               |  |           |  |  |               |  |  |                                                                                                                                                                                                                                                                                                                                                                                                                                                                                                                                                                                                                                                                                                                                                                                                                                                                                                                                                                                                        |                                                                                                                    |
| How                                                                                                                 | Face-to-face                                                                                                                                                                                                                                                                                                                                                                                                                                                                                                                                                                                                                                                                                                                                                                                                                                                                                                                                                                                                                               |                                                        |                 |       |     |           |             |        |          |      |           |                 |                 |                    |                |      |                   |           |   |       |                 |                    |                                                        |                                                                                                                                                                                                                                                                                                                                                                                                                                                                                                                                                                                                                                                                                                                                                                                                                                                                                                                                                                                                                                                                                                                                                                                                                                              |      |                            |                                         |                            |      |                                                                                                                                                                                                                                                                                                                                                                                                                                                                                                                                                                                                                                                  |                                                                                                                                                                                                                                                                                                                                                                                                                                                                                                                                                                                                                                                                                                                                                                                                                                                                                                                                                                                                                                                                                                                                                                                                                                                                                                                                                                                                                                                                                                                                                          |                                                 |                               |                                      |       |                                                                                                                                                                                                                                                                   |                                                        |                |                                                                                                                                                                                                  |              |                                                                                                                                                                                                                                                                                                              |                                                                                                                                                       |                       |     |                                                                                                                                                                                                                                  |  |       |  |  |                   |                                               |  |           |  |  |               |  |  |                                                                                                                                                                                                                                                                                                                                                                                                                                                                                                                                                                                                                                                                                                                                                                                                                                                                                                                                                                                                        |                                                                                                                    |
| Where                                                                                                               | Across 37 different sites throughout the UK                                                                                                                                                                                                                                                                                                                                                                                                                                                                                                                                                                                                                                                                                                                                                                                                                                                                                                                                                                                                |                                                        |                 |       |     |           |             |        |          |      |           |                 |                 |                    |                |      |                   |           |   |       |                 |                    |                                                        |                                                                                                                                                                                                                                                                                                                                                                                                                                                                                                                                                                                                                                                                                                                                                                                                                                                                                                                                                                                                                                                                                                                                                                                                                                              |      |                            |                                         |                            |      |                                                                                                                                                                                                                                                                                                                                                                                                                                                                                                                                                                                                                                                  |                                                                                                                                                                                                                                                                                                                                                                                                                                                                                                                                                                                                                                                                                                                                                                                                                                                                                                                                                                                                                                                                                                                                                                                                                                                                                                                                                                                                                                                                                                                                                          |                                                 |                               |                                      |       |                                                                                                                                                                                                                                                                   |                                                        |                |                                                                                                                                                                                                  |              |                                                                                                                                                                                                                                                                                                              |                                                                                                                                                       |                       |     |                                                                                                                                                                                                                                  |  |       |  |  |                   |                                               |  |           |  |  |               |  |  |                                                                                                                                                                                                                                                                                                                                                                                                                                                                                                                                                                                                                                                                                                                                                                                                                                                                                                                                                                                                        |                                                                                                                    |
| When and How Much                                                                                                   | Up to 12 weeks                                                                                                                                                                                                                                                                                                                                                                                                                                                                                                                                                                                                                                                                                                                                                                                                                                                                                                                                                                                                                             |                                                        |                 |       |     |           |             |        |          |      |           |                 |                 |                    |                |      |                   |           |   |       |                 |                    |                                                        |                                                                                                                                                                                                                                                                                                                                                                                                                                                                                                                                                                                                                                                                                                                                                                                                                                                                                                                                                                                                                                                                                                                                                                                                                                              |      |                            |                                         |                            |      |                                                                                                                                                                                                                                                                                                                                                                                                                                                                                                                                                                                                                                                  |                                                                                                                                                                                                                                                                                                                                                                                                                                                                                                                                                                                                                                                                                                                                                                                                                                                                                                                                                                                                                                                                                                                                                                                                                                                                                                                                                                                                                                                                                                                                                          |                                                 |                               |                                      |       |                                                                                                                                                                                                                                                                   |                                                        |                |                                                                                                                                                                                                  |              |                                                                                                                                                                                                                                                                                                              |                                                                                                                                                       |                       |     |                                                                                                                                                                                                                                  |  |       |  |  |                   |                                               |  |           |  |  |               |  |  |                                                                                                                                                                                                                                                                                                                                                                                                                                                                                                                                                                                                                                                                                                                                                                                                                                                                                                                                                                                                        |                                                                                                                    |
| Tailoring                                                                                                           | Personalized                                                                                                                                                                                                                                                                                                                                                                                                                                                                                                                                                                                                                                                                                                                                                                                                                                                                                                                                                                                                                               |                                                        |                 |       |     |           |             |        |          |      |           |                 |                 |                    |                |      |                   |           |   |       |                 |                    |                                                        |                                                                                                                                                                                                                                                                                                                                                                                                                                                                                                                                                                                                                                                                                                                                                                                                                                                                                                                                                                                                                                                                                                                                                                                                                                              |      |                            |                                         |                            |      |                                                                                                                                                                                                                                                                                                                                                                                                                                                                                                                                                                                                                                                  |                                                                                                                                                                                                                                                                                                                                                                                                                                                                                                                                                                                                                                                                                                                                                                                                                                                                                                                                                                                                                                                                                                                                                                                                                                                                                                                                                                                                                                                                                                                                                          |                                                 |                               |                                      |       |                                                                                                                                                                                                                                                                   |                                                        |                |                                                                                                                                                                                                  |              |                                                                                                                                                                                                                                                                                                              |                                                                                                                                                       |                       |     |                                                                                                                                                                                                                                  |  |       |  |  |                   |                                               |  |           |  |  |               |  |  |                                                                                                                                                                                                                                                                                                                                                                                                                                                                                                                                                                                                                                                                                                                                                                                                                                                                                                                                                                                                        |                                                                                                                    |
| <p>Grant 2000 (20)</p> <p>RCT, parallel group</p> <p>Study length: -</p>                                            | <p><b>Inclusion criteria:</b></p> <p>- aged 16 years or over with psychosocial problems who general practitioners thought might benefit from contact with the voluntary sector</p> <p><b>Exclusion criteria:</b></p> <p>- patients who are unable to complete questionnaires owing to language difficulties, illiteracy, or learning disability</p> <p>Baseline characteristics:</p> <table border="1" data-bbox="477 1304 1074 1650"> <thead> <tr> <th></th> <th></th> <th>I</th> <th>C</th> </tr> </thead> <tbody> <tr> <td>N</td> <td></td> <td>90</td> <td>71</td> </tr> <tr> <td>Age</td> <td>Mean (SD)</td> <td>40.8 (15.5)</td> <td>71, 45.6 (16.8)</td> </tr> <tr> <td>Gender</td> <td>Female %</td> <td>72</td> <td>79</td> </tr> <tr> <td>Ethnicity</td> <td></td> <td>-</td> <td>-</td> </tr> <tr> <td>Living arrangement</td> <td></td> <td>-</td> <td>-</td> </tr> <tr> <td>Employment status</td> <td>Marital status: married or cohabiting %</td> <td>44</td> <td>-</td> </tr> </tbody> </table> <p>Population: General</p> |                                                        |                 | I     | C   | N         |             | 90     | 71       | Age  | Mean (SD) | 40.8 (15.5)     | 71, 45.6 (16.8) | Gender             | Female %       | 72   | 79                | Ethnicity |   | -     | -               | Living arrangement |                                                        | -                                                                                                                                                                                                                                                                                                                                                                                                                                                                                                                                                                                                                                                                                                                                                                                                                                                                                                                                                                                                                                                                                                                                                                                                                                            | -    | Employment status          | Marital status: married or cohabiting % | 44                         | -    | <p>Primary Care, General practice</p> <p>Country: UK (Avon, West England)</p>                                                                                                                                                                                                                                                                                                                                                                                                                                                                                                                                                                    | <table border="1" data-bbox="1299 961 2237 1514"> <tr> <td>Name</td> <td>Amalthea group (intervention)</td> <td>General practitioner group (control)</td> </tr> <tr> <td>Why</td> <td>Improved access to the numerous voluntary organisations with a potentially useful role in the management of psychosocial problems, to improve patients' quality of life and to decrease time spent by healthcare professionals dealing with psychosocial problems</td> <td>Control group in a randomized controlled trial setting</td> </tr> <tr> <td>What</td> <td>Initial assessment within seven days of referral and follow-up on one or more occasions to provide support and to encourage attendance at recommended local and national voluntary organisations</td> <td>Routine care</td> </tr> <tr> <td>Who provided</td> <td>Three project facilitators from different backgrounds were trained and supervised by the organisation</td> <td>General practitioners</td> </tr> <tr> <td>How</td> <td>Patients were offered an initial assessment within seven days of referral and were followed up on one or more occasions to provide support and to encourage attendance at recommended local and national voluntary organisations</td> <td></td> </tr> <tr> <td>Where</td> <td></td> <td></td> </tr> <tr> <td>When and How Much</td> <td>Initial assessment and one or more follow-ups</td> <td></td> </tr> <tr> <td>Tailoring</td> <td></td> <td></td> </tr> <tr> <td>Modifications</td> <td></td> <td></td> </tr> </table> <p>Intervention: Medium</p> | Name                                            | Amalthea group (intervention) | General practitioner group (control) | Why   | Improved access to the numerous voluntary organisations with a potentially useful role in the management of psychosocial problems, to improve patients' quality of life and to decrease time spent by healthcare professionals dealing with psychosocial problems | Control group in a randomized controlled trial setting | What           | Initial assessment within seven days of referral and follow-up on one or more occasions to provide support and to encourage attendance at recommended local and national voluntary organisations | Routine care | Who provided                                                                                                                                                                                                                                                                                                 | Three project facilitators from different backgrounds were trained and supervised by the organisation                                                 | General practitioners | How | Patients were offered an initial assessment within seven days of referral and were followed up on one or more occasions to provide support and to encourage attendance at recommended local and national voluntary organisations |  | Where |  |  | When and How Much | Initial assessment and one or more follow-ups |  | Tailoring |  |  | Modifications |  |  | <p>Patient outcomes at baseline (via questionnaires in the practice) and 1- and 4-months follow-up (mailed questionnaires):</p> <ul style="list-style-type: none"> <li>- hospital anxiety and depression scale (HADS)</li> <li>- social support (DUKE-UNC functional social support questionnaire)</li> <li>- facets of quality of life (COOP/WONCA functional health assessment charts)</li> <li>- delighted-terrible faces scale</li> </ul> <p>Process of care measures (collected during follow-up period):</p> <ul style="list-style-type: none"> <li>- number of contacts with primary healthcare team</li> <li>- cost of contacts with primary healthcare team (£)</li> <li>- number of prescriptions</li> <li>- cost of prescriptions (£)</li> <li>- number of referrals</li> <li>- number of mental health referrals</li> <li>- cost of referrals (£)</li> <li>- total cost of primary healthcare team contacts, prescribing, and referrals (£)</li> <li>- cost of time of Amalthea</li> </ul> | <p>Peer-Review: yes</p> <p>Funding source: Avon Health Authority</p> <p>Declaration of interest: none declared</p> |
|                                                                                                                     |                                                                                                                                                                                                                                                                                                                                                                                                                                                                                                                                                                                                                                                                                                                                                                                                                                                                                                                                                                                                                                            | I                                                      | C               |       |     |           |             |        |          |      |           |                 |                 |                    |                |      |                   |           |   |       |                 |                    |                                                        |                                                                                                                                                                                                                                                                                                                                                                                                                                                                                                                                                                                                                                                                                                                                                                                                                                                                                                                                                                                                                                                                                                                                                                                                                                              |      |                            |                                         |                            |      |                                                                                                                                                                                                                                                                                                                                                                                                                                                                                                                                                                                                                                                  |                                                                                                                                                                                                                                                                                                                                                                                                                                                                                                                                                                                                                                                                                                                                                                                                                                                                                                                                                                                                                                                                                                                                                                                                                                                                                                                                                                                                                                                                                                                                                          |                                                 |                               |                                      |       |                                                                                                                                                                                                                                                                   |                                                        |                |                                                                                                                                                                                                  |              |                                                                                                                                                                                                                                                                                                              |                                                                                                                                                       |                       |     |                                                                                                                                                                                                                                  |  |       |  |  |                   |                                               |  |           |  |  |               |  |  |                                                                                                                                                                                                                                                                                                                                                                                                                                                                                                                                                                                                                                                                                                                                                                                                                                                                                                                                                                                                        |                                                                                                                    |
| N                                                                                                                   |                                                                                                                                                                                                                                                                                                                                                                                                                                                                                                                                                                                                                                                                                                                                                                                                                                                                                                                                                                                                                                            | 90                                                     | 71              |       |     |           |             |        |          |      |           |                 |                 |                    |                |      |                   |           |   |       |                 |                    |                                                        |                                                                                                                                                                                                                                                                                                                                                                                                                                                                                                                                                                                                                                                                                                                                                                                                                                                                                                                                                                                                                                                                                                                                                                                                                                              |      |                            |                                         |                            |      |                                                                                                                                                                                                                                                                                                                                                                                                                                                                                                                                                                                                                                                  |                                                                                                                                                                                                                                                                                                                                                                                                                                                                                                                                                                                                                                                                                                                                                                                                                                                                                                                                                                                                                                                                                                                                                                                                                                                                                                                                                                                                                                                                                                                                                          |                                                 |                               |                                      |       |                                                                                                                                                                                                                                                                   |                                                        |                |                                                                                                                                                                                                  |              |                                                                                                                                                                                                                                                                                                              |                                                                                                                                                       |                       |     |                                                                                                                                                                                                                                  |  |       |  |  |                   |                                               |  |           |  |  |               |  |  |                                                                                                                                                                                                                                                                                                                                                                                                                                                                                                                                                                                                                                                                                                                                                                                                                                                                                                                                                                                                        |                                                                                                                    |
| Age                                                                                                                 | Mean (SD)                                                                                                                                                                                                                                                                                                                                                                                                                                                                                                                                                                                                                                                                                                                                                                                                                                                                                                                                                                                                                                  | 40.8 (15.5)                                            | 71, 45.6 (16.8) |       |     |           |             |        |          |      |           |                 |                 |                    |                |      |                   |           |   |       |                 |                    |                                                        |                                                                                                                                                                                                                                                                                                                                                                                                                                                                                                                                                                                                                                                                                                                                                                                                                                                                                                                                                                                                                                                                                                                                                                                                                                              |      |                            |                                         |                            |      |                                                                                                                                                                                                                                                                                                                                                                                                                                                                                                                                                                                                                                                  |                                                                                                                                                                                                                                                                                                                                                                                                                                                                                                                                                                                                                                                                                                                                                                                                                                                                                                                                                                                                                                                                                                                                                                                                                                                                                                                                                                                                                                                                                                                                                          |                                                 |                               |                                      |       |                                                                                                                                                                                                                                                                   |                                                        |                |                                                                                                                                                                                                  |              |                                                                                                                                                                                                                                                                                                              |                                                                                                                                                       |                       |     |                                                                                                                                                                                                                                  |  |       |  |  |                   |                                               |  |           |  |  |               |  |  |                                                                                                                                                                                                                                                                                                                                                                                                                                                                                                                                                                                                                                                                                                                                                                                                                                                                                                                                                                                                        |                                                                                                                    |
| Gender                                                                                                              | Female %                                                                                                                                                                                                                                                                                                                                                                                                                                                                                                                                                                                                                                                                                                                                                                                                                                                                                                                                                                                                                                   | 72                                                     | 79              |       |     |           |             |        |          |      |           |                 |                 |                    |                |      |                   |           |   |       |                 |                    |                                                        |                                                                                                                                                                                                                                                                                                                                                                                                                                                                                                                                                                                                                                                                                                                                                                                                                                                                                                                                                                                                                                                                                                                                                                                                                                              |      |                            |                                         |                            |      |                                                                                                                                                                                                                                                                                                                                                                                                                                                                                                                                                                                                                                                  |                                                                                                                                                                                                                                                                                                                                                                                                                                                                                                                                                                                                                                                                                                                                                                                                                                                                                                                                                                                                                                                                                                                                                                                                                                                                                                                                                                                                                                                                                                                                                          |                                                 |                               |                                      |       |                                                                                                                                                                                                                                                                   |                                                        |                |                                                                                                                                                                                                  |              |                                                                                                                                                                                                                                                                                                              |                                                                                                                                                       |                       |     |                                                                                                                                                                                                                                  |  |       |  |  |                   |                                               |  |           |  |  |               |  |  |                                                                                                                                                                                                                                                                                                                                                                                                                                                                                                                                                                                                                                                                                                                                                                                                                                                                                                                                                                                                        |                                                                                                                    |
| Ethnicity                                                                                                           |                                                                                                                                                                                                                                                                                                                                                                                                                                                                                                                                                                                                                                                                                                                                                                                                                                                                                                                                                                                                                                            | -                                                      | -               |       |     |           |             |        |          |      |           |                 |                 |                    |                |      |                   |           |   |       |                 |                    |                                                        |                                                                                                                                                                                                                                                                                                                                                                                                                                                                                                                                                                                                                                                                                                                                                                                                                                                                                                                                                                                                                                                                                                                                                                                                                                              |      |                            |                                         |                            |      |                                                                                                                                                                                                                                                                                                                                                                                                                                                                                                                                                                                                                                                  |                                                                                                                                                                                                                                                                                                                                                                                                                                                                                                                                                                                                                                                                                                                                                                                                                                                                                                                                                                                                                                                                                                                                                                                                                                                                                                                                                                                                                                                                                                                                                          |                                                 |                               |                                      |       |                                                                                                                                                                                                                                                                   |                                                        |                |                                                                                                                                                                                                  |              |                                                                                                                                                                                                                                                                                                              |                                                                                                                                                       |                       |     |                                                                                                                                                                                                                                  |  |       |  |  |                   |                                               |  |           |  |  |               |  |  |                                                                                                                                                                                                                                                                                                                                                                                                                                                                                                                                                                                                                                                                                                                                                                                                                                                                                                                                                                                                        |                                                                                                                    |
| Living arrangement                                                                                                  |                                                                                                                                                                                                                                                                                                                                                                                                                                                                                                                                                                                                                                                                                                                                                                                                                                                                                                                                                                                                                                            | -                                                      | -               |       |     |           |             |        |          |      |           |                 |                 |                    |                |      |                   |           |   |       |                 |                    |                                                        |                                                                                                                                                                                                                                                                                                                                                                                                                                                                                                                                                                                                                                                                                                                                                                                                                                                                                                                                                                                                                                                                                                                                                                                                                                              |      |                            |                                         |                            |      |                                                                                                                                                                                                                                                                                                                                                                                                                                                                                                                                                                                                                                                  |                                                                                                                                                                                                                                                                                                                                                                                                                                                                                                                                                                                                                                                                                                                                                                                                                                                                                                                                                                                                                                                                                                                                                                                                                                                                                                                                                                                                                                                                                                                                                          |                                                 |                               |                                      |       |                                                                                                                                                                                                                                                                   |                                                        |                |                                                                                                                                                                                                  |              |                                                                                                                                                                                                                                                                                                              |                                                                                                                                                       |                       |     |                                                                                                                                                                                                                                  |  |       |  |  |                   |                                               |  |           |  |  |               |  |  |                                                                                                                                                                                                                                                                                                                                                                                                                                                                                                                                                                                                                                                                                                                                                                                                                                                                                                                                                                                                        |                                                                                                                    |
| Employment status                                                                                                   | Marital status: married or cohabiting %                                                                                                                                                                                                                                                                                                                                                                                                                                                                                                                                                                                                                                                                                                                                                                                                                                                                                                                                                                                                    | 44                                                     | -               |       |     |           |             |        |          |      |           |                 |                 |                    |                |      |                   |           |   |       |                 |                    |                                                        |                                                                                                                                                                                                                                                                                                                                                                                                                                                                                                                                                                                                                                                                                                                                                                                                                                                                                                                                                                                                                                                                                                                                                                                                                                              |      |                            |                                         |                            |      |                                                                                                                                                                                                                                                                                                                                                                                                                                                                                                                                                                                                                                                  |                                                                                                                                                                                                                                                                                                                                                                                                                                                                                                                                                                                                                                                                                                                                                                                                                                                                                                                                                                                                                                                                                                                                                                                                                                                                                                                                                                                                                                                                                                                                                          |                                                 |                               |                                      |       |                                                                                                                                                                                                                                                                   |                                                        |                |                                                                                                                                                                                                  |              |                                                                                                                                                                                                                                                                                                              |                                                                                                                                                       |                       |     |                                                                                                                                                                                                                                  |  |       |  |  |                   |                                               |  |           |  |  |               |  |  |                                                                                                                                                                                                                                                                                                                                                                                                                                                                                                                                                                                                                                                                                                                                                                                                                                                                                                                                                                                                        |                                                                                                                    |
| Name                                                                                                                | Amalthea group (intervention)                                                                                                                                                                                                                                                                                                                                                                                                                                                                                                                                                                                                                                                                                                                                                                                                                                                                                                                                                                                                              | General practitioner group (control)                   |                 |       |     |           |             |        |          |      |           |                 |                 |                    |                |      |                   |           |   |       |                 |                    |                                                        |                                                                                                                                                                                                                                                                                                                                                                                                                                                                                                                                                                                                                                                                                                                                                                                                                                                                                                                                                                                                                                                                                                                                                                                                                                              |      |                            |                                         |                            |      |                                                                                                                                                                                                                                                                                                                                                                                                                                                                                                                                                                                                                                                  |                                                                                                                                                                                                                                                                                                                                                                                                                                                                                                                                                                                                                                                                                                                                                                                                                                                                                                                                                                                                                                                                                                                                                                                                                                                                                                                                                                                                                                                                                                                                                          |                                                 |                               |                                      |       |                                                                                                                                                                                                                                                                   |                                                        |                |                                                                                                                                                                                                  |              |                                                                                                                                                                                                                                                                                                              |                                                                                                                                                       |                       |     |                                                                                                                                                                                                                                  |  |       |  |  |                   |                                               |  |           |  |  |               |  |  |                                                                                                                                                                                                                                                                                                                                                                                                                                                                                                                                                                                                                                                                                                                                                                                                                                                                                                                                                                                                        |                                                                                                                    |
| Why                                                                                                                 | Improved access to the numerous voluntary organisations with a potentially useful role in the management of psychosocial problems, to improve patients' quality of life and to decrease time spent by healthcare professionals dealing with psychosocial problems                                                                                                                                                                                                                                                                                                                                                                                                                                                                                                                                                                                                                                                                                                                                                                          | Control group in a randomized controlled trial setting |                 |       |     |           |             |        |          |      |           |                 |                 |                    |                |      |                   |           |   |       |                 |                    |                                                        |                                                                                                                                                                                                                                                                                                                                                                                                                                                                                                                                                                                                                                                                                                                                                                                                                                                                                                                                                                                                                                                                                                                                                                                                                                              |      |                            |                                         |                            |      |                                                                                                                                                                                                                                                                                                                                                                                                                                                                                                                                                                                                                                                  |                                                                                                                                                                                                                                                                                                                                                                                                                                                                                                                                                                                                                                                                                                                                                                                                                                                                                                                                                                                                                                                                                                                                                                                                                                                                                                                                                                                                                                                                                                                                                          |                                                 |                               |                                      |       |                                                                                                                                                                                                                                                                   |                                                        |                |                                                                                                                                                                                                  |              |                                                                                                                                                                                                                                                                                                              |                                                                                                                                                       |                       |     |                                                                                                                                                                                                                                  |  |       |  |  |                   |                                               |  |           |  |  |               |  |  |                                                                                                                                                                                                                                                                                                                                                                                                                                                                                                                                                                                                                                                                                                                                                                                                                                                                                                                                                                                                        |                                                                                                                    |
| What                                                                                                                | Initial assessment within seven days of referral and follow-up on one or more occasions to provide support and to encourage attendance at recommended local and national voluntary organisations                                                                                                                                                                                                                                                                                                                                                                                                                                                                                                                                                                                                                                                                                                                                                                                                                                           | Routine care                                           |                 |       |     |           |             |        |          |      |           |                 |                 |                    |                |      |                   |           |   |       |                 |                    |                                                        |                                                                                                                                                                                                                                                                                                                                                                                                                                                                                                                                                                                                                                                                                                                                                                                                                                                                                                                                                                                                                                                                                                                                                                                                                                              |      |                            |                                         |                            |      |                                                                                                                                                                                                                                                                                                                                                                                                                                                                                                                                                                                                                                                  |                                                                                                                                                                                                                                                                                                                                                                                                                                                                                                                                                                                                                                                                                                                                                                                                                                                                                                                                                                                                                                                                                                                                                                                                                                                                                                                                                                                                                                                                                                                                                          |                                                 |                               |                                      |       |                                                                                                                                                                                                                                                                   |                                                        |                |                                                                                                                                                                                                  |              |                                                                                                                                                                                                                                                                                                              |                                                                                                                                                       |                       |     |                                                                                                                                                                                                                                  |  |       |  |  |                   |                                               |  |           |  |  |               |  |  |                                                                                                                                                                                                                                                                                                                                                                                                                                                                                                                                                                                                                                                                                                                                                                                                                                                                                                                                                                                                        |                                                                                                                    |
| Who provided                                                                                                        | Three project facilitators from different backgrounds were trained and supervised by the organisation                                                                                                                                                                                                                                                                                                                                                                                                                                                                                                                                                                                                                                                                                                                                                                                                                                                                                                                                      | General practitioners                                  |                 |       |     |           |             |        |          |      |           |                 |                 |                    |                |      |                   |           |   |       |                 |                    |                                                        |                                                                                                                                                                                                                                                                                                                                                                                                                                                                                                                                                                                                                                                                                                                                                                                                                                                                                                                                                                                                                                                                                                                                                                                                                                              |      |                            |                                         |                            |      |                                                                                                                                                                                                                                                                                                                                                                                                                                                                                                                                                                                                                                                  |                                                                                                                                                                                                                                                                                                                                                                                                                                                                                                                                                                                                                                                                                                                                                                                                                                                                                                                                                                                                                                                                                                                                                                                                                                                                                                                                                                                                                                                                                                                                                          |                                                 |                               |                                      |       |                                                                                                                                                                                                                                                                   |                                                        |                |                                                                                                                                                                                                  |              |                                                                                                                                                                                                                                                                                                              |                                                                                                                                                       |                       |     |                                                                                                                                                                                                                                  |  |       |  |  |                   |                                               |  |           |  |  |               |  |  |                                                                                                                                                                                                                                                                                                                                                                                                                                                                                                                                                                                                                                                                                                                                                                                                                                                                                                                                                                                                        |                                                                                                                    |
| How                                                                                                                 | Patients were offered an initial assessment within seven days of referral and were followed up on one or more occasions to provide support and to encourage attendance at recommended local and national voluntary organisations                                                                                                                                                                                                                                                                                                                                                                                                                                                                                                                                                                                                                                                                                                                                                                                                           |                                                        |                 |       |     |           |             |        |          |      |           |                 |                 |                    |                |      |                   |           |   |       |                 |                    |                                                        |                                                                                                                                                                                                                                                                                                                                                                                                                                                                                                                                                                                                                                                                                                                                                                                                                                                                                                                                                                                                                                                                                                                                                                                                                                              |      |                            |                                         |                            |      |                                                                                                                                                                                                                                                                                                                                                                                                                                                                                                                                                                                                                                                  |                                                                                                                                                                                                                                                                                                                                                                                                                                                                                                                                                                                                                                                                                                                                                                                                                                                                                                                                                                                                                                                                                                                                                                                                                                                                                                                                                                                                                                                                                                                                                          |                                                 |                               |                                      |       |                                                                                                                                                                                                                                                                   |                                                        |                |                                                                                                                                                                                                  |              |                                                                                                                                                                                                                                                                                                              |                                                                                                                                                       |                       |     |                                                                                                                                                                                                                                  |  |       |  |  |                   |                                               |  |           |  |  |               |  |  |                                                                                                                                                                                                                                                                                                                                                                                                                                                                                                                                                                                                                                                                                                                                                                                                                                                                                                                                                                                                        |                                                                                                                    |
| Where                                                                                                               |                                                                                                                                                                                                                                                                                                                                                                                                                                                                                                                                                                                                                                                                                                                                                                                                                                                                                                                                                                                                                                            |                                                        |                 |       |     |           |             |        |          |      |           |                 |                 |                    |                |      |                   |           |   |       |                 |                    |                                                        |                                                                                                                                                                                                                                                                                                                                                                                                                                                                                                                                                                                                                                                                                                                                                                                                                                                                                                                                                                                                                                                                                                                                                                                                                                              |      |                            |                                         |                            |      |                                                                                                                                                                                                                                                                                                                                                                                                                                                                                                                                                                                                                                                  |                                                                                                                                                                                                                                                                                                                                                                                                                                                                                                                                                                                                                                                                                                                                                                                                                                                                                                                                                                                                                                                                                                                                                                                                                                                                                                                                                                                                                                                                                                                                                          |                                                 |                               |                                      |       |                                                                                                                                                                                                                                                                   |                                                        |                |                                                                                                                                                                                                  |              |                                                                                                                                                                                                                                                                                                              |                                                                                                                                                       |                       |     |                                                                                                                                                                                                                                  |  |       |  |  |                   |                                               |  |           |  |  |               |  |  |                                                                                                                                                                                                                                                                                                                                                                                                                                                                                                                                                                                                                                                                                                                                                                                                                                                                                                                                                                                                        |                                                                                                                    |
| When and How Much                                                                                                   | Initial assessment and one or more follow-ups                                                                                                                                                                                                                                                                                                                                                                                                                                                                                                                                                                                                                                                                                                                                                                                                                                                                                                                                                                                              |                                                        |                 |       |     |           |             |        |          |      |           |                 |                 |                    |                |      |                   |           |   |       |                 |                    |                                                        |                                                                                                                                                                                                                                                                                                                                                                                                                                                                                                                                                                                                                                                                                                                                                                                                                                                                                                                                                                                                                                                                                                                                                                                                                                              |      |                            |                                         |                            |      |                                                                                                                                                                                                                                                                                                                                                                                                                                                                                                                                                                                                                                                  |                                                                                                                                                                                                                                                                                                                                                                                                                                                                                                                                                                                                                                                                                                                                                                                                                                                                                                                                                                                                                                                                                                                                                                                                                                                                                                                                                                                                                                                                                                                                                          |                                                 |                               |                                      |       |                                                                                                                                                                                                                                                                   |                                                        |                |                                                                                                                                                                                                  |              |                                                                                                                                                                                                                                                                                                              |                                                                                                                                                       |                       |     |                                                                                                                                                                                                                                  |  |       |  |  |                   |                                               |  |           |  |  |               |  |  |                                                                                                                                                                                                                                                                                                                                                                                                                                                                                                                                                                                                                                                                                                                                                                                                                                                                                                                                                                                                        |                                                                                                                    |
| Tailoring                                                                                                           |                                                                                                                                                                                                                                                                                                                                                                                                                                                                                                                                                                                                                                                                                                                                                                                                                                                                                                                                                                                                                                            |                                                        |                 |       |     |           |             |        |          |      |           |                 |                 |                    |                |      |                   |           |   |       |                 |                    |                                                        |                                                                                                                                                                                                                                                                                                                                                                                                                                                                                                                                                                                                                                                                                                                                                                                                                                                                                                                                                                                                                                                                                                                                                                                                                                              |      |                            |                                         |                            |      |                                                                                                                                                                                                                                                                                                                                                                                                                                                                                                                                                                                                                                                  |                                                                                                                                                                                                                                                                                                                                                                                                                                                                                                                                                                                                                                                                                                                                                                                                                                                                                                                                                                                                                                                                                                                                                                                                                                                                                                                                                                                                                                                                                                                                                          |                                                 |                               |                                      |       |                                                                                                                                                                                                                                                                   |                                                        |                |                                                                                                                                                                                                  |              |                                                                                                                                                                                                                                                                                                              |                                                                                                                                                       |                       |     |                                                                                                                                                                                                                                  |  |       |  |  |                   |                                               |  |           |  |  |               |  |  |                                                                                                                                                                                                                                                                                                                                                                                                                                                                                                                                                                                                                                                                                                                                                                                                                                                                                                                                                                                                        |                                                                                                                    |
| Modifications                                                                                                       |                                                                                                                                                                                                                                                                                                                                                                                                                                                                                                                                                                                                                                                                                                                                                                                                                                                                                                                                                                                                                                            |                                                        |                 |       |     |           |             |        |          |      |           |                 |                 |                    |                |      |                   |           |   |       |                 |                    |                                                        |                                                                                                                                                                                                                                                                                                                                                                                                                                                                                                                                                                                                                                                                                                                                                                                                                                                                                                                                                                                                                                                                                                                                                                                                                                              |      |                            |                                         |                            |      |                                                                                                                                                                                                                                                                                                                                                                                                                                                                                                                                                                                                                                                  |                                                                                                                                                                                                                                                                                                                                                                                                                                                                                                                                                                                                                                                                                                                                                                                                                                                                                                                                                                                                                                                                                                                                                                                                                                                                                                                                                                                                                                                                                                                                                          |                                                 |                               |                                      |       |                                                                                                                                                                                                                                                                   |                                                        |                |                                                                                                                                                                                                  |              |                                                                                                                                                                                                                                                                                                              |                                                                                                                                                       |                       |     |                                                                                                                                                                                                                                  |  |       |  |  |                   |                                               |  |           |  |  |               |  |  |                                                                                                                                                                                                                                                                                                                                                                                                                                                                                                                                                                                                                                                                                                                                                                                                                                                                                                                                                                                                        |                                                                                                                    |

|                    |                                                                                                                                                                                                                                                                                                                                                                                                                                                                   |                                                                                                                                                                                                                                                                                                                                                                                                                                                                                                                                                                                                                                                                                                                                                                                                                                                                                                                                                                                                                                                                                                                                                                                                                                                                                                                                                                                                                                                                                                                                                                                                                                                                                                                                                                                                                                |   |  |                                             |     |           |               |        |          |    |           |         |    |                    |   |   |                   |            |      |       |   |   |                                                                                                              |                                                                                                                                                                                                                                                                                                                                                                                                                                                                                                                                                                                                                                                                                                                                                                                                                                                                                                                                                                                                                                                                                                                                                                                                                                                                                                                                                                                                                                                                                                                                                                                                                                                                                                                                                                                                                                                                                                                                                                                                                                                                                                                                                                                                                                                                           |      |   |     |                                                                                                                                                                                                              |      |                                                                                                                                                                                                                                                                                                    |              |                                                                                                                                                                                                             |     |                                                                                                                                                                                                                                                                                                                                                                                                                                                                   |       |                                                                                                                                                                                                                                                                                                                                                                                                            |                   |                                                                                                                                       |           |                                                                                                                                                                             |                                                                                                                                                                                                                                                                                                                                                                                                                                                                                                                                                                                                                                                                                                                                                                                                                                                                                                                                                                                                                                        |                                                                                                                                                                              |
|--------------------|-------------------------------------------------------------------------------------------------------------------------------------------------------------------------------------------------------------------------------------------------------------------------------------------------------------------------------------------------------------------------------------------------------------------------------------------------------------------|--------------------------------------------------------------------------------------------------------------------------------------------------------------------------------------------------------------------------------------------------------------------------------------------------------------------------------------------------------------------------------------------------------------------------------------------------------------------------------------------------------------------------------------------------------------------------------------------------------------------------------------------------------------------------------------------------------------------------------------------------------------------------------------------------------------------------------------------------------------------------------------------------------------------------------------------------------------------------------------------------------------------------------------------------------------------------------------------------------------------------------------------------------------------------------------------------------------------------------------------------------------------------------------------------------------------------------------------------------------------------------------------------------------------------------------------------------------------------------------------------------------------------------------------------------------------------------------------------------------------------------------------------------------------------------------------------------------------------------------------------------------------------------------------------------------------------------|---|--|---------------------------------------------|-----|-----------|---------------|--------|----------|----|-----------|---------|----|--------------------|---|---|-------------------|------------|------|-------|---|---|--------------------------------------------------------------------------------------------------------------|---------------------------------------------------------------------------------------------------------------------------------------------------------------------------------------------------------------------------------------------------------------------------------------------------------------------------------------------------------------------------------------------------------------------------------------------------------------------------------------------------------------------------------------------------------------------------------------------------------------------------------------------------------------------------------------------------------------------------------------------------------------------------------------------------------------------------------------------------------------------------------------------------------------------------------------------------------------------------------------------------------------------------------------------------------------------------------------------------------------------------------------------------------------------------------------------------------------------------------------------------------------------------------------------------------------------------------------------------------------------------------------------------------------------------------------------------------------------------------------------------------------------------------------------------------------------------------------------------------------------------------------------------------------------------------------------------------------------------------------------------------------------------------------------------------------------------------------------------------------------------------------------------------------------------------------------------------------------------------------------------------------------------------------------------------------------------------------------------------------------------------------------------------------------------------------------------------------------------------------------------------------------------|------|---|-----|--------------------------------------------------------------------------------------------------------------------------------------------------------------------------------------------------------------|------|----------------------------------------------------------------------------------------------------------------------------------------------------------------------------------------------------------------------------------------------------------------------------------------------------|--------------|-------------------------------------------------------------------------------------------------------------------------------------------------------------------------------------------------------------|-----|-------------------------------------------------------------------------------------------------------------------------------------------------------------------------------------------------------------------------------------------------------------------------------------------------------------------------------------------------------------------------------------------------------------------------------------------------------------------|-------|------------------------------------------------------------------------------------------------------------------------------------------------------------------------------------------------------------------------------------------------------------------------------------------------------------------------------------------------------------------------------------------------------------|-------------------|---------------------------------------------------------------------------------------------------------------------------------------|-----------|-----------------------------------------------------------------------------------------------------------------------------------------------------------------------------|----------------------------------------------------------------------------------------------------------------------------------------------------------------------------------------------------------------------------------------------------------------------------------------------------------------------------------------------------------------------------------------------------------------------------------------------------------------------------------------------------------------------------------------------------------------------------------------------------------------------------------------------------------------------------------------------------------------------------------------------------------------------------------------------------------------------------------------------------------------------------------------------------------------------------------------------------------------------------------------------------------------------------------------|------------------------------------------------------------------------------------------------------------------------------------------------------------------------------|
|                    |                                                                                                                                                                                                                                                                                                                                                                                                                                                                   |                                                                                                                                                                                                                                                                                                                                                                                                                                                                                                                                                                                                                                                                                                                                                                                                                                                                                                                                                                                                                                                                                                                                                                                                                                                                                                                                                                                                                                                                                                                                                                                                                                                                                                                                                                                                                                |   |  | Project facilitator (£)<br>- total cost (£) |     |           |               |        |          |    |           |         |    |                    |   |   |                   |            |      |       |   |   |                                                                                                              |                                                                                                                                                                                                                                                                                                                                                                                                                                                                                                                                                                                                                                                                                                                                                                                                                                                                                                                                                                                                                                                                                                                                                                                                                                                                                                                                                                                                                                                                                                                                                                                                                                                                                                                                                                                                                                                                                                                                                                                                                                                                                                                                                                                                                                                                           |      |   |     |                                                                                                                                                                                                              |      |                                                                                                                                                                                                                                                                                                    |              |                                                                                                                                                                                                             |     |                                                                                                                                                                                                                                                                                                                                                                                                                                                                   |       |                                                                                                                                                                                                                                                                                                                                                                                                            |                   |                                                                                                                                       |           |                                                                                                                                                                             |                                                                                                                                                                                                                                                                                                                                                                                                                                                                                                                                                                                                                                                                                                                                                                                                                                                                                                                                                                                                                                        |                                                                                                                                                                              |
| Grayer 2008 (66)   | Uncontrolled before-and-after study<br><br>Study length:<br>12 months                                                                                                                                                                                                                                                                                                                                                                                             | <p><b>Inclusion criteria:</b></p> <ul style="list-style-type: none"> <li>- 18 years old or over</li> <li>- with a psychosocial problem (broad: included common mental health problems such as anxiety and depression, and social problems such as isolation, relationship, housing and financial difficulties which might impact negatively upon patients' psychological wellbeing)</li> </ul> <p><b>Exclusion criteria:</b></p> <ul style="list-style-type: none"> <li>- a current episode of acute psychosis or in crisis, being housebound, people who are, or who should be, under the care of other services, e.g. community mental health team (CMHT) or social services, active suicidal ideation, assessed as follows: <ul style="list-style-type: none"> <li>– if the patient scored three or over on items 6, 9, 22, 24 or 34 or scored one or over on item 16 of the CORE – Outcome Measure questionnaire (CORE-OM), then the GPCMHW asked the patient about suicidal intent. If clear intent was present, then the patient would be informed by the GPCMHW that they would have to break confidentiality and inform the GP. If the risk posed was judged by the GPCMHW to be immediate, then the patient would be asked to wait while the GPCMHW discussed this with the GP</li> </ul> </li> </ul> <p>Baseline characteristics:</p> <table border="1"> <tr> <td>N</td> <td></td> <td>108</td> </tr> <tr> <td>Age</td> <td>Mean (SD)</td> <td>43.14 (14.56)</td> </tr> <tr> <td>Gender</td> <td>Female %</td> <td>62</td> </tr> <tr> <td>Ethnicity</td> <td>White %</td> <td>67</td> </tr> <tr> <td>Living arrangement</td> <td>-</td> <td>-</td> </tr> <tr> <td>Employment status</td> <td>Employed %</td> <td>26.6</td> </tr> <tr> <td>Other</td> <td>-</td> <td>-</td> </tr> </table> <p>Population: General</p> | N |  | 108                                         | Age | Mean (SD) | 43.14 (14.56) | Gender | Female % | 62 | Ethnicity | White % | 67 | Living arrangement | - | - | Employment status | Employed % | 26.6 | Other | - | - | Primary care, General practice<br><br>country:<br>UK (London Boroughs of Camden and Islington, Inner London) | <table border="1"> <tr> <td>Name</td> <td>-</td> </tr> <tr> <td>Why</td> <td>Patients with psychosocial problems may benefit from a variety of community, educational, recreational and voluntary sector resources, but GPs often under-refer to these through lack of knowledge and time</td> </tr> <tr> <td>What</td> <td>Supported the patient's attendance at recommended organisations, e.g. making contact with or accompanying the patient to their initial meeting with the organization (in collaboration with voluntary sector staff as appropriate), or discuss alternatives if initial plans had been unsuccessful</td> </tr> <tr> <td>Who provided</td> <td>GPCMHWs (graduate primary care mental health worker): two recent psychology graduates<br/><br/>- once in post the workers received, in-house training and ongoing supervision from two clinical psychologists</td> </tr> <tr> <td>How</td> <td>Mostly referral from GPs to GPCMHW: to provide a link between the local voluntary and community sectors and inner-city primary healthcare staff across a number of practices<br/><br/>- GPCMHW researched the potential resources available for patients either during the initial session or thereafter, through a combination of paper and electronic directories, telephone enquiries, peer guidance, and supervision from a locally based clinical psychologist</td> </tr> <tr> <td>Where</td> <td>- 13 practices volunteered and participated in the study over a one year period<br/><br/>- in one Borough a 'hub and spoke' model was adopted, whereby the GPCMHW was based at four practices (for half a day/week each), but accepted referrals from an additional two local surgeries<br/><br/>- in the second Borough the GPCMHW was based for a half-day a week or fortnight at each of seven GP practices</td> </tr> <tr> <td>When and How Much</td> <td>The modal number of patient appointments was 2 (range 1 – 3, with the exception of 4 patients, who were seen on 4 or more occasions).</td> </tr> <tr> <td>Tailoring</td> <td>In some practices it was decided that only GPs were able to refer, while at others all clinicians could refer, and at some practices nonclinical staff such as the practice</td> </tr> </table> | Name | - | Why | Patients with psychosocial problems may benefit from a variety of community, educational, recreational and voluntary sector resources, but GPs often under-refer to these through lack of knowledge and time | What | Supported the patient's attendance at recommended organisations, e.g. making contact with or accompanying the patient to their initial meeting with the organization (in collaboration with voluntary sector staff as appropriate), or discuss alternatives if initial plans had been unsuccessful | Who provided | GPCMHWs (graduate primary care mental health worker): two recent psychology graduates<br><br>- once in post the workers received, in-house training and ongoing supervision from two clinical psychologists | How | Mostly referral from GPs to GPCMHW: to provide a link between the local voluntary and community sectors and inner-city primary healthcare staff across a number of practices<br><br>- GPCMHW researched the potential resources available for patients either during the initial session or thereafter, through a combination of paper and electronic directories, telephone enquiries, peer guidance, and supervision from a locally based clinical psychologist | Where | - 13 practices volunteered and participated in the study over a one year period<br><br>- in one Borough a 'hub and spoke' model was adopted, whereby the GPCMHW was based at four practices (for half a day/week each), but accepted referrals from an additional two local surgeries<br><br>- in the second Borough the GPCMHW was based for a half-day a week or fortnight at each of seven GP practices | When and How Much | The modal number of patient appointments was 2 (range 1 – 3, with the exception of 4 patients, who were seen on 4 or more occasions). | Tailoring | In some practices it was decided that only GPs were able to refer, while at others all clinicians could refer, and at some practices nonclinical staff such as the practice | <p>Patient outcomes at baseline (pre intervention, during initial appointment the GPCMHW administered questionnaires) and 3-months follow-up (research assistant met with the patient to administer questionnaires, if the patient did not want a face-to-face follow up appointment or defaulted ,the questionnaires were posted):</p> <ul style="list-style-type: none"> <li>- General Health Questionnaire-1 (GHQ-12)</li> <li>- Clinical Outcomes in Routine Evaluation- Outcomes Measure (CORE-OM)</li> <li>- Work and Social Adjustment Scale (WSAS)</li> <li>- clinical satisfaction questionnaire (CSQ, likert scale 1-4)</li> </ul> <p>Process of care measures (obtained from patient medical records for the three month period prior to the date of referral and for the three month period following the patient's first appointment with the GPCMHW):</p> <ul style="list-style-type: none"> <li>- PHC consultations</li> <li>- PHC consultations with a psychosocial aspect</li> <li>- onwards mental health</li> </ul> | <p>Peer-Review:<br/>Yes</p> <p>Funding source:<br/>Camden and Islington HealthAction Zone, Camden PCT and Islington PCT</p> <p>Declaration of interest:<br/>non declared</p> |
| N                  |                                                                                                                                                                                                                                                                                                                                                                                                                                                                   | 108                                                                                                                                                                                                                                                                                                                                                                                                                                                                                                                                                                                                                                                                                                                                                                                                                                                                                                                                                                                                                                                                                                                                                                                                                                                                                                                                                                                                                                                                                                                                                                                                                                                                                                                                                                                                                            |   |  |                                             |     |           |               |        |          |    |           |         |    |                    |   |   |                   |            |      |       |   |   |                                                                                                              |                                                                                                                                                                                                                                                                                                                                                                                                                                                                                                                                                                                                                                                                                                                                                                                                                                                                                                                                                                                                                                                                                                                                                                                                                                                                                                                                                                                                                                                                                                                                                                                                                                                                                                                                                                                                                                                                                                                                                                                                                                                                                                                                                                                                                                                                           |      |   |     |                                                                                                                                                                                                              |      |                                                                                                                                                                                                                                                                                                    |              |                                                                                                                                                                                                             |     |                                                                                                                                                                                                                                                                                                                                                                                                                                                                   |       |                                                                                                                                                                                                                                                                                                                                                                                                            |                   |                                                                                                                                       |           |                                                                                                                                                                             |                                                                                                                                                                                                                                                                                                                                                                                                                                                                                                                                                                                                                                                                                                                                                                                                                                                                                                                                                                                                                                        |                                                                                                                                                                              |
| Age                | Mean (SD)                                                                                                                                                                                                                                                                                                                                                                                                                                                         | 43.14 (14.56)                                                                                                                                                                                                                                                                                                                                                                                                                                                                                                                                                                                                                                                                                                                                                                                                                                                                                                                                                                                                                                                                                                                                                                                                                                                                                                                                                                                                                                                                                                                                                                                                                                                                                                                                                                                                                  |   |  |                                             |     |           |               |        |          |    |           |         |    |                    |   |   |                   |            |      |       |   |   |                                                                                                              |                                                                                                                                                                                                                                                                                                                                                                                                                                                                                                                                                                                                                                                                                                                                                                                                                                                                                                                                                                                                                                                                                                                                                                                                                                                                                                                                                                                                                                                                                                                                                                                                                                                                                                                                                                                                                                                                                                                                                                                                                                                                                                                                                                                                                                                                           |      |   |     |                                                                                                                                                                                                              |      |                                                                                                                                                                                                                                                                                                    |              |                                                                                                                                                                                                             |     |                                                                                                                                                                                                                                                                                                                                                                                                                                                                   |       |                                                                                                                                                                                                                                                                                                                                                                                                            |                   |                                                                                                                                       |           |                                                                                                                                                                             |                                                                                                                                                                                                                                                                                                                                                                                                                                                                                                                                                                                                                                                                                                                                                                                                                                                                                                                                                                                                                                        |                                                                                                                                                                              |
| Gender             | Female %                                                                                                                                                                                                                                                                                                                                                                                                                                                          | 62                                                                                                                                                                                                                                                                                                                                                                                                                                                                                                                                                                                                                                                                                                                                                                                                                                                                                                                                                                                                                                                                                                                                                                                                                                                                                                                                                                                                                                                                                                                                                                                                                                                                                                                                                                                                                             |   |  |                                             |     |           |               |        |          |    |           |         |    |                    |   |   |                   |            |      |       |   |   |                                                                                                              |                                                                                                                                                                                                                                                                                                                                                                                                                                                                                                                                                                                                                                                                                                                                                                                                                                                                                                                                                                                                                                                                                                                                                                                                                                                                                                                                                                                                                                                                                                                                                                                                                                                                                                                                                                                                                                                                                                                                                                                                                                                                                                                                                                                                                                                                           |      |   |     |                                                                                                                                                                                                              |      |                                                                                                                                                                                                                                                                                                    |              |                                                                                                                                                                                                             |     |                                                                                                                                                                                                                                                                                                                                                                                                                                                                   |       |                                                                                                                                                                                                                                                                                                                                                                                                            |                   |                                                                                                                                       |           |                                                                                                                                                                             |                                                                                                                                                                                                                                                                                                                                                                                                                                                                                                                                                                                                                                                                                                                                                                                                                                                                                                                                                                                                                                        |                                                                                                                                                                              |
| Ethnicity          | White %                                                                                                                                                                                                                                                                                                                                                                                                                                                           | 67                                                                                                                                                                                                                                                                                                                                                                                                                                                                                                                                                                                                                                                                                                                                                                                                                                                                                                                                                                                                                                                                                                                                                                                                                                                                                                                                                                                                                                                                                                                                                                                                                                                                                                                                                                                                                             |   |  |                                             |     |           |               |        |          |    |           |         |    |                    |   |   |                   |            |      |       |   |   |                                                                                                              |                                                                                                                                                                                                                                                                                                                                                                                                                                                                                                                                                                                                                                                                                                                                                                                                                                                                                                                                                                                                                                                                                                                                                                                                                                                                                                                                                                                                                                                                                                                                                                                                                                                                                                                                                                                                                                                                                                                                                                                                                                                                                                                                                                                                                                                                           |      |   |     |                                                                                                                                                                                                              |      |                                                                                                                                                                                                                                                                                                    |              |                                                                                                                                                                                                             |     |                                                                                                                                                                                                                                                                                                                                                                                                                                                                   |       |                                                                                                                                                                                                                                                                                                                                                                                                            |                   |                                                                                                                                       |           |                                                                                                                                                                             |                                                                                                                                                                                                                                                                                                                                                                                                                                                                                                                                                                                                                                                                                                                                                                                                                                                                                                                                                                                                                                        |                                                                                                                                                                              |
| Living arrangement | -                                                                                                                                                                                                                                                                                                                                                                                                                                                                 | -                                                                                                                                                                                                                                                                                                                                                                                                                                                                                                                                                                                                                                                                                                                                                                                                                                                                                                                                                                                                                                                                                                                                                                                                                                                                                                                                                                                                                                                                                                                                                                                                                                                                                                                                                                                                                              |   |  |                                             |     |           |               |        |          |    |           |         |    |                    |   |   |                   |            |      |       |   |   |                                                                                                              |                                                                                                                                                                                                                                                                                                                                                                                                                                                                                                                                                                                                                                                                                                                                                                                                                                                                                                                                                                                                                                                                                                                                                                                                                                                                                                                                                                                                                                                                                                                                                                                                                                                                                                                                                                                                                                                                                                                                                                                                                                                                                                                                                                                                                                                                           |      |   |     |                                                                                                                                                                                                              |      |                                                                                                                                                                                                                                                                                                    |              |                                                                                                                                                                                                             |     |                                                                                                                                                                                                                                                                                                                                                                                                                                                                   |       |                                                                                                                                                                                                                                                                                                                                                                                                            |                   |                                                                                                                                       |           |                                                                                                                                                                             |                                                                                                                                                                                                                                                                                                                                                                                                                                                                                                                                                                                                                                                                                                                                                                                                                                                                                                                                                                                                                                        |                                                                                                                                                                              |
| Employment status  | Employed %                                                                                                                                                                                                                                                                                                                                                                                                                                                        | 26.6                                                                                                                                                                                                                                                                                                                                                                                                                                                                                                                                                                                                                                                                                                                                                                                                                                                                                                                                                                                                                                                                                                                                                                                                                                                                                                                                                                                                                                                                                                                                                                                                                                                                                                                                                                                                                           |   |  |                                             |     |           |               |        |          |    |           |         |    |                    |   |   |                   |            |      |       |   |   |                                                                                                              |                                                                                                                                                                                                                                                                                                                                                                                                                                                                                                                                                                                                                                                                                                                                                                                                                                                                                                                                                                                                                                                                                                                                                                                                                                                                                                                                                                                                                                                                                                                                                                                                                                                                                                                                                                                                                                                                                                                                                                                                                                                                                                                                                                                                                                                                           |      |   |     |                                                                                                                                                                                                              |      |                                                                                                                                                                                                                                                                                                    |              |                                                                                                                                                                                                             |     |                                                                                                                                                                                                                                                                                                                                                                                                                                                                   |       |                                                                                                                                                                                                                                                                                                                                                                                                            |                   |                                                                                                                                       |           |                                                                                                                                                                             |                                                                                                                                                                                                                                                                                                                                                                                                                                                                                                                                                                                                                                                                                                                                                                                                                                                                                                                                                                                                                                        |                                                                                                                                                                              |
| Other              | -                                                                                                                                                                                                                                                                                                                                                                                                                                                                 | -                                                                                                                                                                                                                                                                                                                                                                                                                                                                                                                                                                                                                                                                                                                                                                                                                                                                                                                                                                                                                                                                                                                                                                                                                                                                                                                                                                                                                                                                                                                                                                                                                                                                                                                                                                                                                              |   |  |                                             |     |           |               |        |          |    |           |         |    |                    |   |   |                   |            |      |       |   |   |                                                                                                              |                                                                                                                                                                                                                                                                                                                                                                                                                                                                                                                                                                                                                                                                                                                                                                                                                                                                                                                                                                                                                                                                                                                                                                                                                                                                                                                                                                                                                                                                                                                                                                                                                                                                                                                                                                                                                                                                                                                                                                                                                                                                                                                                                                                                                                                                           |      |   |     |                                                                                                                                                                                                              |      |                                                                                                                                                                                                                                                                                                    |              |                                                                                                                                                                                                             |     |                                                                                                                                                                                                                                                                                                                                                                                                                                                                   |       |                                                                                                                                                                                                                                                                                                                                                                                                            |                   |                                                                                                                                       |           |                                                                                                                                                                             |                                                                                                                                                                                                                                                                                                                                                                                                                                                                                                                                                                                                                                                                                                                                                                                                                                                                                                                                                                                                                                        |                                                                                                                                                                              |
| Name               | -                                                                                                                                                                                                                                                                                                                                                                                                                                                                 |                                                                                                                                                                                                                                                                                                                                                                                                                                                                                                                                                                                                                                                                                                                                                                                                                                                                                                                                                                                                                                                                                                                                                                                                                                                                                                                                                                                                                                                                                                                                                                                                                                                                                                                                                                                                                                |   |  |                                             |     |           |               |        |          |    |           |         |    |                    |   |   |                   |            |      |       |   |   |                                                                                                              |                                                                                                                                                                                                                                                                                                                                                                                                                                                                                                                                                                                                                                                                                                                                                                                                                                                                                                                                                                                                                                                                                                                                                                                                                                                                                                                                                                                                                                                                                                                                                                                                                                                                                                                                                                                                                                                                                                                                                                                                                                                                                                                                                                                                                                                                           |      |   |     |                                                                                                                                                                                                              |      |                                                                                                                                                                                                                                                                                                    |              |                                                                                                                                                                                                             |     |                                                                                                                                                                                                                                                                                                                                                                                                                                                                   |       |                                                                                                                                                                                                                                                                                                                                                                                                            |                   |                                                                                                                                       |           |                                                                                                                                                                             |                                                                                                                                                                                                                                                                                                                                                                                                                                                                                                                                                                                                                                                                                                                                                                                                                                                                                                                                                                                                                                        |                                                                                                                                                                              |
| Why                | Patients with psychosocial problems may benefit from a variety of community, educational, recreational and voluntary sector resources, but GPs often under-refer to these through lack of knowledge and time                                                                                                                                                                                                                                                      |                                                                                                                                                                                                                                                                                                                                                                                                                                                                                                                                                                                                                                                                                                                                                                                                                                                                                                                                                                                                                                                                                                                                                                                                                                                                                                                                                                                                                                                                                                                                                                                                                                                                                                                                                                                                                                |   |  |                                             |     |           |               |        |          |    |           |         |    |                    |   |   |                   |            |      |       |   |   |                                                                                                              |                                                                                                                                                                                                                                                                                                                                                                                                                                                                                                                                                                                                                                                                                                                                                                                                                                                                                                                                                                                                                                                                                                                                                                                                                                                                                                                                                                                                                                                                                                                                                                                                                                                                                                                                                                                                                                                                                                                                                                                                                                                                                                                                                                                                                                                                           |      |   |     |                                                                                                                                                                                                              |      |                                                                                                                                                                                                                                                                                                    |              |                                                                                                                                                                                                             |     |                                                                                                                                                                                                                                                                                                                                                                                                                                                                   |       |                                                                                                                                                                                                                                                                                                                                                                                                            |                   |                                                                                                                                       |           |                                                                                                                                                                             |                                                                                                                                                                                                                                                                                                                                                                                                                                                                                                                                                                                                                                                                                                                                                                                                                                                                                                                                                                                                                                        |                                                                                                                                                                              |
| What               | Supported the patient's attendance at recommended organisations, e.g. making contact with or accompanying the patient to their initial meeting with the organization (in collaboration with voluntary sector staff as appropriate), or discuss alternatives if initial plans had been unsuccessful                                                                                                                                                                |                                                                                                                                                                                                                                                                                                                                                                                                                                                                                                                                                                                                                                                                                                                                                                                                                                                                                                                                                                                                                                                                                                                                                                                                                                                                                                                                                                                                                                                                                                                                                                                                                                                                                                                                                                                                                                |   |  |                                             |     |           |               |        |          |    |           |         |    |                    |   |   |                   |            |      |       |   |   |                                                                                                              |                                                                                                                                                                                                                                                                                                                                                                                                                                                                                                                                                                                                                                                                                                                                                                                                                                                                                                                                                                                                                                                                                                                                                                                                                                                                                                                                                                                                                                                                                                                                                                                                                                                                                                                                                                                                                                                                                                                                                                                                                                                                                                                                                                                                                                                                           |      |   |     |                                                                                                                                                                                                              |      |                                                                                                                                                                                                                                                                                                    |              |                                                                                                                                                                                                             |     |                                                                                                                                                                                                                                                                                                                                                                                                                                                                   |       |                                                                                                                                                                                                                                                                                                                                                                                                            |                   |                                                                                                                                       |           |                                                                                                                                                                             |                                                                                                                                                                                                                                                                                                                                                                                                                                                                                                                                                                                                                                                                                                                                                                                                                                                                                                                                                                                                                                        |                                                                                                                                                                              |
| Who provided       | GPCMHWs (graduate primary care mental health worker): two recent psychology graduates<br><br>- once in post the workers received, in-house training and ongoing supervision from two clinical psychologists                                                                                                                                                                                                                                                       |                                                                                                                                                                                                                                                                                                                                                                                                                                                                                                                                                                                                                                                                                                                                                                                                                                                                                                                                                                                                                                                                                                                                                                                                                                                                                                                                                                                                                                                                                                                                                                                                                                                                                                                                                                                                                                |   |  |                                             |     |           |               |        |          |    |           |         |    |                    |   |   |                   |            |      |       |   |   |                                                                                                              |                                                                                                                                                                                                                                                                                                                                                                                                                                                                                                                                                                                                                                                                                                                                                                                                                                                                                                                                                                                                                                                                                                                                                                                                                                                                                                                                                                                                                                                                                                                                                                                                                                                                                                                                                                                                                                                                                                                                                                                                                                                                                                                                                                                                                                                                           |      |   |     |                                                                                                                                                                                                              |      |                                                                                                                                                                                                                                                                                                    |              |                                                                                                                                                                                                             |     |                                                                                                                                                                                                                                                                                                                                                                                                                                                                   |       |                                                                                                                                                                                                                                                                                                                                                                                                            |                   |                                                                                                                                       |           |                                                                                                                                                                             |                                                                                                                                                                                                                                                                                                                                                                                                                                                                                                                                                                                                                                                                                                                                                                                                                                                                                                                                                                                                                                        |                                                                                                                                                                              |
| How                | Mostly referral from GPs to GPCMHW: to provide a link between the local voluntary and community sectors and inner-city primary healthcare staff across a number of practices<br><br>- GPCMHW researched the potential resources available for patients either during the initial session or thereafter, through a combination of paper and electronic directories, telephone enquiries, peer guidance, and supervision from a locally based clinical psychologist |                                                                                                                                                                                                                                                                                                                                                                                                                                                                                                                                                                                                                                                                                                                                                                                                                                                                                                                                                                                                                                                                                                                                                                                                                                                                                                                                                                                                                                                                                                                                                                                                                                                                                                                                                                                                                                |   |  |                                             |     |           |               |        |          |    |           |         |    |                    |   |   |                   |            |      |       |   |   |                                                                                                              |                                                                                                                                                                                                                                                                                                                                                                                                                                                                                                                                                                                                                                                                                                                                                                                                                                                                                                                                                                                                                                                                                                                                                                                                                                                                                                                                                                                                                                                                                                                                                                                                                                                                                                                                                                                                                                                                                                                                                                                                                                                                                                                                                                                                                                                                           |      |   |     |                                                                                                                                                                                                              |      |                                                                                                                                                                                                                                                                                                    |              |                                                                                                                                                                                                             |     |                                                                                                                                                                                                                                                                                                                                                                                                                                                                   |       |                                                                                                                                                                                                                                                                                                                                                                                                            |                   |                                                                                                                                       |           |                                                                                                                                                                             |                                                                                                                                                                                                                                                                                                                                                                                                                                                                                                                                                                                                                                                                                                                                                                                                                                                                                                                                                                                                                                        |                                                                                                                                                                              |
| Where              | - 13 practices volunteered and participated in the study over a one year period<br><br>- in one Borough a 'hub and spoke' model was adopted, whereby the GPCMHW was based at four practices (for half a day/week each), but accepted referrals from an additional two local surgeries<br><br>- in the second Borough the GPCMHW was based for a half-day a week or fortnight at each of seven GP practices                                                        |                                                                                                                                                                                                                                                                                                                                                                                                                                                                                                                                                                                                                                                                                                                                                                                                                                                                                                                                                                                                                                                                                                                                                                                                                                                                                                                                                                                                                                                                                                                                                                                                                                                                                                                                                                                                                                |   |  |                                             |     |           |               |        |          |    |           |         |    |                    |   |   |                   |            |      |       |   |   |                                                                                                              |                                                                                                                                                                                                                                                                                                                                                                                                                                                                                                                                                                                                                                                                                                                                                                                                                                                                                                                                                                                                                                                                                                                                                                                                                                                                                                                                                                                                                                                                                                                                                                                                                                                                                                                                                                                                                                                                                                                                                                                                                                                                                                                                                                                                                                                                           |      |   |     |                                                                                                                                                                                                              |      |                                                                                                                                                                                                                                                                                                    |              |                                                                                                                                                                                                             |     |                                                                                                                                                                                                                                                                                                                                                                                                                                                                   |       |                                                                                                                                                                                                                                                                                                                                                                                                            |                   |                                                                                                                                       |           |                                                                                                                                                                             |                                                                                                                                                                                                                                                                                                                                                                                                                                                                                                                                                                                                                                                                                                                                                                                                                                                                                                                                                                                                                                        |                                                                                                                                                                              |
| When and How Much  | The modal number of patient appointments was 2 (range 1 – 3, with the exception of 4 patients, who were seen on 4 or more occasions).                                                                                                                                                                                                                                                                                                                             |                                                                                                                                                                                                                                                                                                                                                                                                                                                                                                                                                                                                                                                                                                                                                                                                                                                                                                                                                                                                                                                                                                                                                                                                                                                                                                                                                                                                                                                                                                                                                                                                                                                                                                                                                                                                                                |   |  |                                             |     |           |               |        |          |    |           |         |    |                    |   |   |                   |            |      |       |   |   |                                                                                                              |                                                                                                                                                                                                                                                                                                                                                                                                                                                                                                                                                                                                                                                                                                                                                                                                                                                                                                                                                                                                                                                                                                                                                                                                                                                                                                                                                                                                                                                                                                                                                                                                                                                                                                                                                                                                                                                                                                                                                                                                                                                                                                                                                                                                                                                                           |      |   |     |                                                                                                                                                                                                              |      |                                                                                                                                                                                                                                                                                                    |              |                                                                                                                                                                                                             |     |                                                                                                                                                                                                                                                                                                                                                                                                                                                                   |       |                                                                                                                                                                                                                                                                                                                                                                                                            |                   |                                                                                                                                       |           |                                                                                                                                                                             |                                                                                                                                                                                                                                                                                                                                                                                                                                                                                                                                                                                                                                                                                                                                                                                                                                                                                                                                                                                                                                        |                                                                                                                                                                              |
| Tailoring          | In some practices it was decided that only GPs were able to refer, while at others all clinicians could refer, and at some practices nonclinical staff such as the practice                                                                                                                                                                                                                                                                                       |                                                                                                                                                                                                                                                                                                                                                                                                                                                                                                                                                                                                                                                                                                                                                                                                                                                                                                                                                                                                                                                                                                                                                                                                                                                                                                                                                                                                                                                                                                                                                                                                                                                                                                                                                                                                                                |   |  |                                             |     |           |               |        |          |    |           |         |    |                    |   |   |                   |            |      |       |   |   |                                                                                                              |                                                                                                                                                                                                                                                                                                                                                                                                                                                                                                                                                                                                                                                                                                                                                                                                                                                                                                                                                                                                                                                                                                                                                                                                                                                                                                                                                                                                                                                                                                                                                                                                                                                                                                                                                                                                                                                                                                                                                                                                                                                                                                                                                                                                                                                                           |      |   |     |                                                                                                                                                                                                              |      |                                                                                                                                                                                                                                                                                                    |              |                                                                                                                                                                                                             |     |                                                                                                                                                                                                                                                                                                                                                                                                                                                                   |       |                                                                                                                                                                                                                                                                                                                                                                                                            |                   |                                                                                                                                       |           |                                                                                                                                                                             |                                                                                                                                                                                                                                                                                                                                                                                                                                                                                                                                                                                                                                                                                                                                                                                                                                                                                                                                                                                                                                        |                                                                                                                                                                              |

|                                 |                                                                                                                                                                                                                                                                                                                                                                                                                                                                                                                                                                                          |                                                                                                                                                                                                                                                                                                                                                                                                                                                                                                                                                                                                                                                                                                                                                                                                  |   |                                                                         |     |                                                  |               |    |        |          |      |           |         |    |                    |   |   |                   |   |   |       |   |   |                                                                                  |                                                                                                                                                                                                                                                                                                                                                                                                                                                                                                                                                                                                                                                                                                                                                                                                                                                                                                                                                                                                                                                                                                                                                                                                                                                                                                                                                                                                                                                                               |      |                                      |     |                                                                                                                                                                                                                                                                                                                                                                                                                                                                                                                                                                                          |      |                                                                                                                                                                                                                                                                                                                                                                            |              |                                                                                              |     |              |       |              |                   |                                                                                                               |           |              |                                                                                                                                                                                                                                                                                                                                                                                                            |                                                                                                                                                                    |
|---------------------------------|------------------------------------------------------------------------------------------------------------------------------------------------------------------------------------------------------------------------------------------------------------------------------------------------------------------------------------------------------------------------------------------------------------------------------------------------------------------------------------------------------------------------------------------------------------------------------------------|--------------------------------------------------------------------------------------------------------------------------------------------------------------------------------------------------------------------------------------------------------------------------------------------------------------------------------------------------------------------------------------------------------------------------------------------------------------------------------------------------------------------------------------------------------------------------------------------------------------------------------------------------------------------------------------------------------------------------------------------------------------------------------------------------|---|-------------------------------------------------------------------------|-----|--------------------------------------------------|---------------|----|--------|----------|------|-----------|---------|----|--------------------|---|---|-------------------|---|---|-------|---|---|----------------------------------------------------------------------------------|-------------------------------------------------------------------------------------------------------------------------------------------------------------------------------------------------------------------------------------------------------------------------------------------------------------------------------------------------------------------------------------------------------------------------------------------------------------------------------------------------------------------------------------------------------------------------------------------------------------------------------------------------------------------------------------------------------------------------------------------------------------------------------------------------------------------------------------------------------------------------------------------------------------------------------------------------------------------------------------------------------------------------------------------------------------------------------------------------------------------------------------------------------------------------------------------------------------------------------------------------------------------------------------------------------------------------------------------------------------------------------------------------------------------------------------------------------------------------------|------|--------------------------------------|-----|------------------------------------------------------------------------------------------------------------------------------------------------------------------------------------------------------------------------------------------------------------------------------------------------------------------------------------------------------------------------------------------------------------------------------------------------------------------------------------------------------------------------------------------------------------------------------------------|------|----------------------------------------------------------------------------------------------------------------------------------------------------------------------------------------------------------------------------------------------------------------------------------------------------------------------------------------------------------------------------|--------------|----------------------------------------------------------------------------------------------|-----|--------------|-------|--------------|-------------------|---------------------------------------------------------------------------------------------------------------|-----------|--------------|------------------------------------------------------------------------------------------------------------------------------------------------------------------------------------------------------------------------------------------------------------------------------------------------------------------------------------------------------------------------------------------------------------|--------------------------------------------------------------------------------------------------------------------------------------------------------------------|
|                                 |                                                                                                                                                                                                                                                                                                                                                                                                                                                                                                                                                                                          |                                                                                                                                                                                                                                                                                                                                                                                                                                                                                                                                                                                                                                                                                                                                                                                                  |   | manager made indirect referrals by making suggestions to clinical staff |     | - related referrals<br>- psychotropic medication |               |    |        |          |      |           |         |    |                    |   |   |                   |   |   |       |   |   |                                                                                  |                                                                                                                                                                                                                                                                                                                                                                                                                                                                                                                                                                                                                                                                                                                                                                                                                                                                                                                                                                                                                                                                                                                                                                                                                                                                                                                                                                                                                                                                               |      |                                      |     |                                                                                                                                                                                                                                                                                                                                                                                                                                                                                                                                                                                          |      |                                                                                                                                                                                                                                                                                                                                                                            |              |                                                                                              |     |              |       |              |                   |                                                                                                               |           |              |                                                                                                                                                                                                                                                                                                                                                                                                            |                                                                                                                                                                    |
|                                 |                                                                                                                                                                                                                                                                                                                                                                                                                                                                                                                                                                                          |                                                                                                                                                                                                                                                                                                                                                                                                                                                                                                                                                                                                                                                                                                                                                                                                  |   | Intervention: Holistic                                                  |     |                                                  |               |    |        |          |      |           |         |    |                    |   |   |                   |   |   |       |   |   |                                                                                  |                                                                                                                                                                                                                                                                                                                                                                                                                                                                                                                                                                                                                                                                                                                                                                                                                                                                                                                                                                                                                                                                                                                                                                                                                                                                                                                                                                                                                                                                               |      |                                      |     |                                                                                                                                                                                                                                                                                                                                                                                                                                                                                                                                                                                          |      |                                                                                                                                                                                                                                                                                                                                                                            |              |                                                                                              |     |              |       |              |                   |                                                                                                               |           |              |                                                                                                                                                                                                                                                                                                                                                                                                            |                                                                                                                                                                    |
| Healthy Dialogues Ltd 2018 (18) | Uncontrolled before-and-after study, mixed-methods<br><br>Study length:<br>12 months                                                                                                                                                                                                                                                                                                                                                                                                                                                                                                     | <p><b>Inclusion criteria:</b></p> <ul style="list-style-type: none"> <li>- frequent attendance to GP services</li> <li>- social isolation</li> <li>- mild/moderate mental health issues</li> <li>- social needs</li> <li>- recent hospital admissions</li> </ul> <p><b>Exclusion criteria:-</b></p> <p>Baseline characteristics:</p> <table border="1"> <tr> <td>N</td> <td></td> <td>316</td> </tr> <tr> <td>Age</td> <td>40-49 years %</td> <td>15</td> </tr> <tr> <td>Gender</td> <td>Female %</td> <td>71</td> </tr> <tr> <td>Ethnicity</td> <td>White %</td> <td>55</td> </tr> <tr> <td>Living arrangement</td> <td>-</td> <td>-</td> </tr> <tr> <td>Employment status</td> <td>-</td> <td>-</td> </tr> <tr> <td>Other</td> <td>-</td> <td>-</td> </tr> </table> <p>Population: General</p> | N |                                                                         | 316 | Age                                              | 40-49 years % | 15 | Gender | Female % | 71   | Ethnicity | White % | 55 | Living arrangement | - | - | Employment status | - | - | Other | - | - | Primary care<br><br>Country:<br>UK (London Borough of Merton, South West London) | <table border="1"> <tr> <td>Name</td> <td>East Merton Social Prescribing Pilot</td> </tr> <tr> <td>Why</td> <td>Free up GP professional time while connecting people to their community and community resources, promote self-help, social engagement and resilience to its population in East Merton, improve the health and wellbeing of patients by providing access to non-medical support<br/>- reduce avoidable costs including A&amp;E attendances and hospital admissions</td> </tr> <tr> <td>What</td> <td>Initial consultation appointment, needs assessment structured around the Wellbeing STAR, plan, referral or signposting to activities provided by the local voluntary and community sector, basic assistance with form filling, benefits eligibility checks or engagement with mental health services</td> </tr> <tr> <td>Who provided</td> <td>One Social Prescribing Coordinator (SPC) (worked at both practices for two days a week each)</td> </tr> <tr> <td>How</td> <td>Face-to-face</td> </tr> <tr> <td>Where</td> <td>GP practices</td> </tr> <tr> <td>When and How Much</td> <td>One-hour initial consultation, where needed the SPC offers a follow-up appointment at three-monthly intervals</td> </tr> <tr> <td>Tailoring</td> <td>Personalized</td> </tr> </table> <p>Intervention: Holistic</p>                                                                                                                                              | Name | East Merton Social Prescribing Pilot | Why | Free up GP professional time while connecting people to their community and community resources, promote self-help, social engagement and resilience to its population in East Merton, improve the health and wellbeing of patients by providing access to non-medical support<br>- reduce avoidable costs including A&E attendances and hospital admissions                                                                                                                                                                                                                             | What | Initial consultation appointment, needs assessment structured around the Wellbeing STAR, plan, referral or signposting to activities provided by the local voluntary and community sector, basic assistance with form filling, benefits eligibility checks or engagement with mental health services                                                                       | Who provided | One Social Prescribing Coordinator (SPC) (worked at both practices for two days a week each) | How | Face-to-face | Where | GP practices | When and How Much | One-hour initial consultation, where needed the SPC offers a follow-up appointment at three-monthly intervals | Tailoring | Personalized | <p>Patient outcomes (at each Social Prescribing appointment, the SPC asks the patient to fill in):</p> <ul style="list-style-type: none"> <li>- Wellbeing Star</li> </ul> <p>Process of care measures (3/6 months before and 3/6 months after intervention):</p> <ul style="list-style-type: none"> <li>- number of GP appointments</li> <li>- A&amp;E attendance</li> </ul>                               | <p>Peer-Review:</p> <p>No</p> <p>Funding source: Merton Partnership, Merton CCG and Merton Council Public Health</p> <p>Declaration of interest: not mentioned</p> |
| N                               |                                                                                                                                                                                                                                                                                                                                                                                                                                                                                                                                                                                          | 316                                                                                                                                                                                                                                                                                                                                                                                                                                                                                                                                                                                                                                                                                                                                                                                              |   |                                                                         |     |                                                  |               |    |        |          |      |           |         |    |                    |   |   |                   |   |   |       |   |   |                                                                                  |                                                                                                                                                                                                                                                                                                                                                                                                                                                                                                                                                                                                                                                                                                                                                                                                                                                                                                                                                                                                                                                                                                                                                                                                                                                                                                                                                                                                                                                                               |      |                                      |     |                                                                                                                                                                                                                                                                                                                                                                                                                                                                                                                                                                                          |      |                                                                                                                                                                                                                                                                                                                                                                            |              |                                                                                              |     |              |       |              |                   |                                                                                                               |           |              |                                                                                                                                                                                                                                                                                                                                                                                                            |                                                                                                                                                                    |
| Age                             | 40-49 years %                                                                                                                                                                                                                                                                                                                                                                                                                                                                                                                                                                            | 15                                                                                                                                                                                                                                                                                                                                                                                                                                                                                                                                                                                                                                                                                                                                                                                               |   |                                                                         |     |                                                  |               |    |        |          |      |           |         |    |                    |   |   |                   |   |   |       |   |   |                                                                                  |                                                                                                                                                                                                                                                                                                                                                                                                                                                                                                                                                                                                                                                                                                                                                                                                                                                                                                                                                                                                                                                                                                                                                                                                                                                                                                                                                                                                                                                                               |      |                                      |     |                                                                                                                                                                                                                                                                                                                                                                                                                                                                                                                                                                                          |      |                                                                                                                                                                                                                                                                                                                                                                            |              |                                                                                              |     |              |       |              |                   |                                                                                                               |           |              |                                                                                                                                                                                                                                                                                                                                                                                                            |                                                                                                                                                                    |
| Gender                          | Female %                                                                                                                                                                                                                                                                                                                                                                                                                                                                                                                                                                                 | 71                                                                                                                                                                                                                                                                                                                                                                                                                                                                                                                                                                                                                                                                                                                                                                                               |   |                                                                         |     |                                                  |               |    |        |          |      |           |         |    |                    |   |   |                   |   |   |       |   |   |                                                                                  |                                                                                                                                                                                                                                                                                                                                                                                                                                                                                                                                                                                                                                                                                                                                                                                                                                                                                                                                                                                                                                                                                                                                                                                                                                                                                                                                                                                                                                                                               |      |                                      |     |                                                                                                                                                                                                                                                                                                                                                                                                                                                                                                                                                                                          |      |                                                                                                                                                                                                                                                                                                                                                                            |              |                                                                                              |     |              |       |              |                   |                                                                                                               |           |              |                                                                                                                                                                                                                                                                                                                                                                                                            |                                                                                                                                                                    |
| Ethnicity                       | White %                                                                                                                                                                                                                                                                                                                                                                                                                                                                                                                                                                                  | 55                                                                                                                                                                                                                                                                                                                                                                                                                                                                                                                                                                                                                                                                                                                                                                                               |   |                                                                         |     |                                                  |               |    |        |          |      |           |         |    |                    |   |   |                   |   |   |       |   |   |                                                                                  |                                                                                                                                                                                                                                                                                                                                                                                                                                                                                                                                                                                                                                                                                                                                                                                                                                                                                                                                                                                                                                                                                                                                                                                                                                                                                                                                                                                                                                                                               |      |                                      |     |                                                                                                                                                                                                                                                                                                                                                                                                                                                                                                                                                                                          |      |                                                                                                                                                                                                                                                                                                                                                                            |              |                                                                                              |     |              |       |              |                   |                                                                                                               |           |              |                                                                                                                                                                                                                                                                                                                                                                                                            |                                                                                                                                                                    |
| Living arrangement              | -                                                                                                                                                                                                                                                                                                                                                                                                                                                                                                                                                                                        | -                                                                                                                                                                                                                                                                                                                                                                                                                                                                                                                                                                                                                                                                                                                                                                                                |   |                                                                         |     |                                                  |               |    |        |          |      |           |         |    |                    |   |   |                   |   |   |       |   |   |                                                                                  |                                                                                                                                                                                                                                                                                                                                                                                                                                                                                                                                                                                                                                                                                                                                                                                                                                                                                                                                                                                                                                                                                                                                                                                                                                                                                                                                                                                                                                                                               |      |                                      |     |                                                                                                                                                                                                                                                                                                                                                                                                                                                                                                                                                                                          |      |                                                                                                                                                                                                                                                                                                                                                                            |              |                                                                                              |     |              |       |              |                   |                                                                                                               |           |              |                                                                                                                                                                                                                                                                                                                                                                                                            |                                                                                                                                                                    |
| Employment status               | -                                                                                                                                                                                                                                                                                                                                                                                                                                                                                                                                                                                        | -                                                                                                                                                                                                                                                                                                                                                                                                                                                                                                                                                                                                                                                                                                                                                                                                |   |                                                                         |     |                                                  |               |    |        |          |      |           |         |    |                    |   |   |                   |   |   |       |   |   |                                                                                  |                                                                                                                                                                                                                                                                                                                                                                                                                                                                                                                                                                                                                                                                                                                                                                                                                                                                                                                                                                                                                                                                                                                                                                                                                                                                                                                                                                                                                                                                               |      |                                      |     |                                                                                                                                                                                                                                                                                                                                                                                                                                                                                                                                                                                          |      |                                                                                                                                                                                                                                                                                                                                                                            |              |                                                                                              |     |              |       |              |                   |                                                                                                               |           |              |                                                                                                                                                                                                                                                                                                                                                                                                            |                                                                                                                                                                    |
| Other                           | -                                                                                                                                                                                                                                                                                                                                                                                                                                                                                                                                                                                        | -                                                                                                                                                                                                                                                                                                                                                                                                                                                                                                                                                                                                                                                                                                                                                                                                |   |                                                                         |     |                                                  |               |    |        |          |      |           |         |    |                    |   |   |                   |   |   |       |   |   |                                                                                  |                                                                                                                                                                                                                                                                                                                                                                                                                                                                                                                                                                                                                                                                                                                                                                                                                                                                                                                                                                                                                                                                                                                                                                                                                                                                                                                                                                                                                                                                               |      |                                      |     |                                                                                                                                                                                                                                                                                                                                                                                                                                                                                                                                                                                          |      |                                                                                                                                                                                                                                                                                                                                                                            |              |                                                                                              |     |              |       |              |                   |                                                                                                               |           |              |                                                                                                                                                                                                                                                                                                                                                                                                            |                                                                                                                                                                    |
| Name                            | East Merton Social Prescribing Pilot                                                                                                                                                                                                                                                                                                                                                                                                                                                                                                                                                     |                                                                                                                                                                                                                                                                                                                                                                                                                                                                                                                                                                                                                                                                                                                                                                                                  |   |                                                                         |     |                                                  |               |    |        |          |      |           |         |    |                    |   |   |                   |   |   |       |   |   |                                                                                  |                                                                                                                                                                                                                                                                                                                                                                                                                                                                                                                                                                                                                                                                                                                                                                                                                                                                                                                                                                                                                                                                                                                                                                                                                                                                                                                                                                                                                                                                               |      |                                      |     |                                                                                                                                                                                                                                                                                                                                                                                                                                                                                                                                                                                          |      |                                                                                                                                                                                                                                                                                                                                                                            |              |                                                                                              |     |              |       |              |                   |                                                                                                               |           |              |                                                                                                                                                                                                                                                                                                                                                                                                            |                                                                                                                                                                    |
| Why                             | Free up GP professional time while connecting people to their community and community resources, promote self-help, social engagement and resilience to its population in East Merton, improve the health and wellbeing of patients by providing access to non-medical support<br>- reduce avoidable costs including A&E attendances and hospital admissions                                                                                                                                                                                                                             |                                                                                                                                                                                                                                                                                                                                                                                                                                                                                                                                                                                                                                                                                                                                                                                                  |   |                                                                         |     |                                                  |               |    |        |          |      |           |         |    |                    |   |   |                   |   |   |       |   |   |                                                                                  |                                                                                                                                                                                                                                                                                                                                                                                                                                                                                                                                                                                                                                                                                                                                                                                                                                                                                                                                                                                                                                                                                                                                                                                                                                                                                                                                                                                                                                                                               |      |                                      |     |                                                                                                                                                                                                                                                                                                                                                                                                                                                                                                                                                                                          |      |                                                                                                                                                                                                                                                                                                                                                                            |              |                                                                                              |     |              |       |              |                   |                                                                                                               |           |              |                                                                                                                                                                                                                                                                                                                                                                                                            |                                                                                                                                                                    |
| What                            | Initial consultation appointment, needs assessment structured around the Wellbeing STAR, plan, referral or signposting to activities provided by the local voluntary and community sector, basic assistance with form filling, benefits eligibility checks or engagement with mental health services                                                                                                                                                                                                                                                                                     |                                                                                                                                                                                                                                                                                                                                                                                                                                                                                                                                                                                                                                                                                                                                                                                                  |   |                                                                         |     |                                                  |               |    |        |          |      |           |         |    |                    |   |   |                   |   |   |       |   |   |                                                                                  |                                                                                                                                                                                                                                                                                                                                                                                                                                                                                                                                                                                                                                                                                                                                                                                                                                                                                                                                                                                                                                                                                                                                                                                                                                                                                                                                                                                                                                                                               |      |                                      |     |                                                                                                                                                                                                                                                                                                                                                                                                                                                                                                                                                                                          |      |                                                                                                                                                                                                                                                                                                                                                                            |              |                                                                                              |     |              |       |              |                   |                                                                                                               |           |              |                                                                                                                                                                                                                                                                                                                                                                                                            |                                                                                                                                                                    |
| Who provided                    | One Social Prescribing Coordinator (SPC) (worked at both practices for two days a week each)                                                                                                                                                                                                                                                                                                                                                                                                                                                                                             |                                                                                                                                                                                                                                                                                                                                                                                                                                                                                                                                                                                                                                                                                                                                                                                                  |   |                                                                         |     |                                                  |               |    |        |          |      |           |         |    |                    |   |   |                   |   |   |       |   |   |                                                                                  |                                                                                                                                                                                                                                                                                                                                                                                                                                                                                                                                                                                                                                                                                                                                                                                                                                                                                                                                                                                                                                                                                                                                                                                                                                                                                                                                                                                                                                                                               |      |                                      |     |                                                                                                                                                                                                                                                                                                                                                                                                                                                                                                                                                                                          |      |                                                                                                                                                                                                                                                                                                                                                                            |              |                                                                                              |     |              |       |              |                   |                                                                                                               |           |              |                                                                                                                                                                                                                                                                                                                                                                                                            |                                                                                                                                                                    |
| How                             | Face-to-face                                                                                                                                                                                                                                                                                                                                                                                                                                                                                                                                                                             |                                                                                                                                                                                                                                                                                                                                                                                                                                                                                                                                                                                                                                                                                                                                                                                                  |   |                                                                         |     |                                                  |               |    |        |          |      |           |         |    |                    |   |   |                   |   |   |       |   |   |                                                                                  |                                                                                                                                                                                                                                                                                                                                                                                                                                                                                                                                                                                                                                                                                                                                                                                                                                                                                                                                                                                                                                                                                                                                                                                                                                                                                                                                                                                                                                                                               |      |                                      |     |                                                                                                                                                                                                                                                                                                                                                                                                                                                                                                                                                                                          |      |                                                                                                                                                                                                                                                                                                                                                                            |              |                                                                                              |     |              |       |              |                   |                                                                                                               |           |              |                                                                                                                                                                                                                                                                                                                                                                                                            |                                                                                                                                                                    |
| Where                           | GP practices                                                                                                                                                                                                                                                                                                                                                                                                                                                                                                                                                                             |                                                                                                                                                                                                                                                                                                                                                                                                                                                                                                                                                                                                                                                                                                                                                                                                  |   |                                                                         |     |                                                  |               |    |        |          |      |           |         |    |                    |   |   |                   |   |   |       |   |   |                                                                                  |                                                                                                                                                                                                                                                                                                                                                                                                                                                                                                                                                                                                                                                                                                                                                                                                                                                                                                                                                                                                                                                                                                                                                                                                                                                                                                                                                                                                                                                                               |      |                                      |     |                                                                                                                                                                                                                                                                                                                                                                                                                                                                                                                                                                                          |      |                                                                                                                                                                                                                                                                                                                                                                            |              |                                                                                              |     |              |       |              |                   |                                                                                                               |           |              |                                                                                                                                                                                                                                                                                                                                                                                                            |                                                                                                                                                                    |
| When and How Much               | One-hour initial consultation, where needed the SPC offers a follow-up appointment at three-monthly intervals                                                                                                                                                                                                                                                                                                                                                                                                                                                                            |                                                                                                                                                                                                                                                                                                                                                                                                                                                                                                                                                                                                                                                                                                                                                                                                  |   |                                                                         |     |                                                  |               |    |        |          |      |           |         |    |                    |   |   |                   |   |   |       |   |   |                                                                                  |                                                                                                                                                                                                                                                                                                                                                                                                                                                                                                                                                                                                                                                                                                                                                                                                                                                                                                                                                                                                                                                                                                                                                                                                                                                                                                                                                                                                                                                                               |      |                                      |     |                                                                                                                                                                                                                                                                                                                                                                                                                                                                                                                                                                                          |      |                                                                                                                                                                                                                                                                                                                                                                            |              |                                                                                              |     |              |       |              |                   |                                                                                                               |           |              |                                                                                                                                                                                                                                                                                                                                                                                                            |                                                                                                                                                                    |
| Tailoring                       | Personalized                                                                                                                                                                                                                                                                                                                                                                                                                                                                                                                                                                             |                                                                                                                                                                                                                                                                                                                                                                                                                                                                                                                                                                                                                                                                                                                                                                                                  |   |                                                                         |     |                                                  |               |    |        |          |      |           |         |    |                    |   |   |                   |   |   |       |   |   |                                                                                  |                                                                                                                                                                                                                                                                                                                                                                                                                                                                                                                                                                                                                                                                                                                                                                                                                                                                                                                                                                                                                                                                                                                                                                                                                                                                                                                                                                                                                                                                               |      |                                      |     |                                                                                                                                                                                                                                                                                                                                                                                                                                                                                                                                                                                          |      |                                                                                                                                                                                                                                                                                                                                                                            |              |                                                                                              |     |              |       |              |                   |                                                                                                               |           |              |                                                                                                                                                                                                                                                                                                                                                                                                            |                                                                                                                                                                    |
| Holt 2020 (67)                  | Uncontrolled before-and-after study, multi-level, repeated measures design<br><br>Study length:<br>23 months                                                                                                                                                                                                                                                                                                                                                                                                                                                                             | <p><b>Inclusion criteria: -</b></p> <p><b>Exclusion criteria:-</b></p> <p>Baseline characteristics:</p> <table border="1"> <tr> <td>N</td> <td></td> <td>66</td> </tr> <tr> <td>Age</td> <td>Mean</td> <td>47</td> </tr> <tr> <td>Gender</td> <td>Female %</td> <td>87.9</td> </tr> <tr> <td>Ethnicity</td> <td>-</td> <td>-</td> </tr> <tr> <td>Living arrangement</td> <td>-</td> <td>-</td> </tr> <tr> <td>Employment status</td> <td>-</td> <td>-</td> </tr> <tr> <td>Other</td> <td>-</td> <td>-</td> </tr> </table> <p>Population: Unclear</p>                                                                                                                                                                                                                                             | N |                                                                         | 66  | Age                                              | Mean          | 47 | Gender | Female % | 87.9 | Ethnicity | -       | -  | Living arrangement | - | - | Employment status | - | - | Other | - | - | Setting unclear<br><br>Country:<br>UK (Bristol, South West England)              | <table border="1"> <tr> <td>Name</td> <td>Arts-on-prescription</td> </tr> <tr> <td>Why</td> <td>Evaluate the extent to which dimensions of mood (hedonic tone, tense arousal and energetic arousal) are affected by art-making, how these change over time, and whether this predicts any long-term changes in wellbeing<br/><br/>- test a novel evaluation tool (mood tracking) that is easy to deliver and useful for inferring mechanisms of change. to improve the mental health of patients and to reduce the burden on the National Health Service (NHS), social prescription is being explored as a route to reducing the financial burden of patientcare, decreasing visits to GPs</td> </tr> <tr> <td>What</td> <td>Range of art techniques and ideas to help patients explore their own creativity and were supported to learn and explore new artistic skills at their own pace throughout the programme<br/><br/>-activities are structured according to individual need and interest, and may include clay work, water colour, mixed media, drawing, print work, collage, felting, and so on</td> </tr> <tr> <td>Who provided</td> <td>Two skilled arts and health practitioner</td> </tr> <tr> <td>How</td> <td>Face-to-face</td> </tr> <tr> <td>Where</td> <td>-</td> </tr> <tr> <td>When and How Much</td> <td>12 weeks, typically weekly meetings for about 2 hours</td> </tr> <tr> <td>Tailoring</td> <td>-</td> </tr> </table> <p>Intervention: Medium</p> | Name | Arts-on-prescription                 | Why | Evaluate the extent to which dimensions of mood (hedonic tone, tense arousal and energetic arousal) are affected by art-making, how these change over time, and whether this predicts any long-term changes in wellbeing<br><br>- test a novel evaluation tool (mood tracking) that is easy to deliver and useful for inferring mechanisms of change. to improve the mental health of patients and to reduce the burden on the National Health Service (NHS), social prescription is being explored as a route to reducing the financial burden of patientcare, decreasing visits to GPs | What | Range of art techniques and ideas to help patients explore their own creativity and were supported to learn and explore new artistic skills at their own pace throughout the programme<br><br>-activities are structured according to individual need and interest, and may include clay work, water colour, mixed media, drawing, print work, collage, felting, and so on | Who provided | Two skilled arts and health practitioner                                                     | How | Face-to-face | Where | -            | When and How Much | 12 weeks, typically weekly meetings for about 2 hours                                                         | Tailoring | -            | <p>Patient outcomes at the start of the programme, before a half-term break, on their return from this break and at the end of the programme. Participants were also invited to complete the SMS at the start and end of each art workshop via questionnaire:</p> <ul style="list-style-type: none"> <li>- Short Mood Scale (SMS)*</li> <li>- Warwick Edinburgh Mental Wellbeing Scale (WEMWBS)</li> </ul> | <p>Peer-Review:</p> <p>Yes</p> <p>Funding source: No financial support</p> <p>Declaration of interest: None declared</p>                                           |
| N                               |                                                                                                                                                                                                                                                                                                                                                                                                                                                                                                                                                                                          | 66                                                                                                                                                                                                                                                                                                                                                                                                                                                                                                                                                                                                                                                                                                                                                                                               |   |                                                                         |     |                                                  |               |    |        |          |      |           |         |    |                    |   |   |                   |   |   |       |   |   |                                                                                  |                                                                                                                                                                                                                                                                                                                                                                                                                                                                                                                                                                                                                                                                                                                                                                                                                                                                                                                                                                                                                                                                                                                                                                                                                                                                                                                                                                                                                                                                               |      |                                      |     |                                                                                                                                                                                                                                                                                                                                                                                                                                                                                                                                                                                          |      |                                                                                                                                                                                                                                                                                                                                                                            |              |                                                                                              |     |              |       |              |                   |                                                                                                               |           |              |                                                                                                                                                                                                                                                                                                                                                                                                            |                                                                                                                                                                    |
| Age                             | Mean                                                                                                                                                                                                                                                                                                                                                                                                                                                                                                                                                                                     | 47                                                                                                                                                                                                                                                                                                                                                                                                                                                                                                                                                                                                                                                                                                                                                                                               |   |                                                                         |     |                                                  |               |    |        |          |      |           |         |    |                    |   |   |                   |   |   |       |   |   |                                                                                  |                                                                                                                                                                                                                                                                                                                                                                                                                                                                                                                                                                                                                                                                                                                                                                                                                                                                                                                                                                                                                                                                                                                                                                                                                                                                                                                                                                                                                                                                               |      |                                      |     |                                                                                                                                                                                                                                                                                                                                                                                                                                                                                                                                                                                          |      |                                                                                                                                                                                                                                                                                                                                                                            |              |                                                                                              |     |              |       |              |                   |                                                                                                               |           |              |                                                                                                                                                                                                                                                                                                                                                                                                            |                                                                                                                                                                    |
| Gender                          | Female %                                                                                                                                                                                                                                                                                                                                                                                                                                                                                                                                                                                 | 87.9                                                                                                                                                                                                                                                                                                                                                                                                                                                                                                                                                                                                                                                                                                                                                                                             |   |                                                                         |     |                                                  |               |    |        |          |      |           |         |    |                    |   |   |                   |   |   |       |   |   |                                                                                  |                                                                                                                                                                                                                                                                                                                                                                                                                                                                                                                                                                                                                                                                                                                                                                                                                                                                                                                                                                                                                                                                                                                                                                                                                                                                                                                                                                                                                                                                               |      |                                      |     |                                                                                                                                                                                                                                                                                                                                                                                                                                                                                                                                                                                          |      |                                                                                                                                                                                                                                                                                                                                                                            |              |                                                                                              |     |              |       |              |                   |                                                                                                               |           |              |                                                                                                                                                                                                                                                                                                                                                                                                            |                                                                                                                                                                    |
| Ethnicity                       | -                                                                                                                                                                                                                                                                                                                                                                                                                                                                                                                                                                                        | -                                                                                                                                                                                                                                                                                                                                                                                                                                                                                                                                                                                                                                                                                                                                                                                                |   |                                                                         |     |                                                  |               |    |        |          |      |           |         |    |                    |   |   |                   |   |   |       |   |   |                                                                                  |                                                                                                                                                                                                                                                                                                                                                                                                                                                                                                                                                                                                                                                                                                                                                                                                                                                                                                                                                                                                                                                                                                                                                                                                                                                                                                                                                                                                                                                                               |      |                                      |     |                                                                                                                                                                                                                                                                                                                                                                                                                                                                                                                                                                                          |      |                                                                                                                                                                                                                                                                                                                                                                            |              |                                                                                              |     |              |       |              |                   |                                                                                                               |           |              |                                                                                                                                                                                                                                                                                                                                                                                                            |                                                                                                                                                                    |
| Living arrangement              | -                                                                                                                                                                                                                                                                                                                                                                                                                                                                                                                                                                                        | -                                                                                                                                                                                                                                                                                                                                                                                                                                                                                                                                                                                                                                                                                                                                                                                                |   |                                                                         |     |                                                  |               |    |        |          |      |           |         |    |                    |   |   |                   |   |   |       |   |   |                                                                                  |                                                                                                                                                                                                                                                                                                                                                                                                                                                                                                                                                                                                                                                                                                                                                                                                                                                                                                                                                                                                                                                                                                                                                                                                                                                                                                                                                                                                                                                                               |      |                                      |     |                                                                                                                                                                                                                                                                                                                                                                                                                                                                                                                                                                                          |      |                                                                                                                                                                                                                                                                                                                                                                            |              |                                                                                              |     |              |       |              |                   |                                                                                                               |           |              |                                                                                                                                                                                                                                                                                                                                                                                                            |                                                                                                                                                                    |
| Employment status               | -                                                                                                                                                                                                                                                                                                                                                                                                                                                                                                                                                                                        | -                                                                                                                                                                                                                                                                                                                                                                                                                                                                                                                                                                                                                                                                                                                                                                                                |   |                                                                         |     |                                                  |               |    |        |          |      |           |         |    |                    |   |   |                   |   |   |       |   |   |                                                                                  |                                                                                                                                                                                                                                                                                                                                                                                                                                                                                                                                                                                                                                                                                                                                                                                                                                                                                                                                                                                                                                                                                                                                                                                                                                                                                                                                                                                                                                                                               |      |                                      |     |                                                                                                                                                                                                                                                                                                                                                                                                                                                                                                                                                                                          |      |                                                                                                                                                                                                                                                                                                                                                                            |              |                                                                                              |     |              |       |              |                   |                                                                                                               |           |              |                                                                                                                                                                                                                                                                                                                                                                                                            |                                                                                                                                                                    |
| Other                           | -                                                                                                                                                                                                                                                                                                                                                                                                                                                                                                                                                                                        | -                                                                                                                                                                                                                                                                                                                                                                                                                                                                                                                                                                                                                                                                                                                                                                                                |   |                                                                         |     |                                                  |               |    |        |          |      |           |         |    |                    |   |   |                   |   |   |       |   |   |                                                                                  |                                                                                                                                                                                                                                                                                                                                                                                                                                                                                                                                                                                                                                                                                                                                                                                                                                                                                                                                                                                                                                                                                                                                                                                                                                                                                                                                                                                                                                                                               |      |                                      |     |                                                                                                                                                                                                                                                                                                                                                                                                                                                                                                                                                                                          |      |                                                                                                                                                                                                                                                                                                                                                                            |              |                                                                                              |     |              |       |              |                   |                                                                                                               |           |              |                                                                                                                                                                                                                                                                                                                                                                                                            |                                                                                                                                                                    |
| Name                            | Arts-on-prescription                                                                                                                                                                                                                                                                                                                                                                                                                                                                                                                                                                     |                                                                                                                                                                                                                                                                                                                                                                                                                                                                                                                                                                                                                                                                                                                                                                                                  |   |                                                                         |     |                                                  |               |    |        |          |      |           |         |    |                    |   |   |                   |   |   |       |   |   |                                                                                  |                                                                                                                                                                                                                                                                                                                                                                                                                                                                                                                                                                                                                                                                                                                                                                                                                                                                                                                                                                                                                                                                                                                                                                                                                                                                                                                                                                                                                                                                               |      |                                      |     |                                                                                                                                                                                                                                                                                                                                                                                                                                                                                                                                                                                          |      |                                                                                                                                                                                                                                                                                                                                                                            |              |                                                                                              |     |              |       |              |                   |                                                                                                               |           |              |                                                                                                                                                                                                                                                                                                                                                                                                            |                                                                                                                                                                    |
| Why                             | Evaluate the extent to which dimensions of mood (hedonic tone, tense arousal and energetic arousal) are affected by art-making, how these change over time, and whether this predicts any long-term changes in wellbeing<br><br>- test a novel evaluation tool (mood tracking) that is easy to deliver and useful for inferring mechanisms of change. to improve the mental health of patients and to reduce the burden on the National Health Service (NHS), social prescription is being explored as a route to reducing the financial burden of patientcare, decreasing visits to GPs |                                                                                                                                                                                                                                                                                                                                                                                                                                                                                                                                                                                                                                                                                                                                                                                                  |   |                                                                         |     |                                                  |               |    |        |          |      |           |         |    |                    |   |   |                   |   |   |       |   |   |                                                                                  |                                                                                                                                                                                                                                                                                                                                                                                                                                                                                                                                                                                                                                                                                                                                                                                                                                                                                                                                                                                                                                                                                                                                                                                                                                                                                                                                                                                                                                                                               |      |                                      |     |                                                                                                                                                                                                                                                                                                                                                                                                                                                                                                                                                                                          |      |                                                                                                                                                                                                                                                                                                                                                                            |              |                                                                                              |     |              |       |              |                   |                                                                                                               |           |              |                                                                                                                                                                                                                                                                                                                                                                                                            |                                                                                                                                                                    |
| What                            | Range of art techniques and ideas to help patients explore their own creativity and were supported to learn and explore new artistic skills at their own pace throughout the programme<br><br>-activities are structured according to individual need and interest, and may include clay work, water colour, mixed media, drawing, print work, collage, felting, and so on                                                                                                                                                                                                               |                                                                                                                                                                                                                                                                                                                                                                                                                                                                                                                                                                                                                                                                                                                                                                                                  |   |                                                                         |     |                                                  |               |    |        |          |      |           |         |    |                    |   |   |                   |   |   |       |   |   |                                                                                  |                                                                                                                                                                                                                                                                                                                                                                                                                                                                                                                                                                                                                                                                                                                                                                                                                                                                                                                                                                                                                                                                                                                                                                                                                                                                                                                                                                                                                                                                               |      |                                      |     |                                                                                                                                                                                                                                                                                                                                                                                                                                                                                                                                                                                          |      |                                                                                                                                                                                                                                                                                                                                                                            |              |                                                                                              |     |              |       |              |                   |                                                                                                               |           |              |                                                                                                                                                                                                                                                                                                                                                                                                            |                                                                                                                                                                    |
| Who provided                    | Two skilled arts and health practitioner                                                                                                                                                                                                                                                                                                                                                                                                                                                                                                                                                 |                                                                                                                                                                                                                                                                                                                                                                                                                                                                                                                                                                                                                                                                                                                                                                                                  |   |                                                                         |     |                                                  |               |    |        |          |      |           |         |    |                    |   |   |                   |   |   |       |   |   |                                                                                  |                                                                                                                                                                                                                                                                                                                                                                                                                                                                                                                                                                                                                                                                                                                                                                                                                                                                                                                                                                                                                                                                                                                                                                                                                                                                                                                                                                                                                                                                               |      |                                      |     |                                                                                                                                                                                                                                                                                                                                                                                                                                                                                                                                                                                          |      |                                                                                                                                                                                                                                                                                                                                                                            |              |                                                                                              |     |              |       |              |                   |                                                                                                               |           |              |                                                                                                                                                                                                                                                                                                                                                                                                            |                                                                                                                                                                    |
| How                             | Face-to-face                                                                                                                                                                                                                                                                                                                                                                                                                                                                                                                                                                             |                                                                                                                                                                                                                                                                                                                                                                                                                                                                                                                                                                                                                                                                                                                                                                                                  |   |                                                                         |     |                                                  |               |    |        |          |      |           |         |    |                    |   |   |                   |   |   |       |   |   |                                                                                  |                                                                                                                                                                                                                                                                                                                                                                                                                                                                                                                                                                                                                                                                                                                                                                                                                                                                                                                                                                                                                                                                                                                                                                                                                                                                                                                                                                                                                                                                               |      |                                      |     |                                                                                                                                                                                                                                                                                                                                                                                                                                                                                                                                                                                          |      |                                                                                                                                                                                                                                                                                                                                                                            |              |                                                                                              |     |              |       |              |                   |                                                                                                               |           |              |                                                                                                                                                                                                                                                                                                                                                                                                            |                                                                                                                                                                    |
| Where                           | -                                                                                                                                                                                                                                                                                                                                                                                                                                                                                                                                                                                        |                                                                                                                                                                                                                                                                                                                                                                                                                                                                                                                                                                                                                                                                                                                                                                                                  |   |                                                                         |     |                                                  |               |    |        |          |      |           |         |    |                    |   |   |                   |   |   |       |   |   |                                                                                  |                                                                                                                                                                                                                                                                                                                                                                                                                                                                                                                                                                                                                                                                                                                                                                                                                                                                                                                                                                                                                                                                                                                                                                                                                                                                                                                                                                                                                                                                               |      |                                      |     |                                                                                                                                                                                                                                                                                                                                                                                                                                                                                                                                                                                          |      |                                                                                                                                                                                                                                                                                                                                                                            |              |                                                                                              |     |              |       |              |                   |                                                                                                               |           |              |                                                                                                                                                                                                                                                                                                                                                                                                            |                                                                                                                                                                    |
| When and How Much               | 12 weeks, typically weekly meetings for about 2 hours                                                                                                                                                                                                                                                                                                                                                                                                                                                                                                                                    |                                                                                                                                                                                                                                                                                                                                                                                                                                                                                                                                                                                                                                                                                                                                                                                                  |   |                                                                         |     |                                                  |               |    |        |          |      |           |         |    |                    |   |   |                   |   |   |       |   |   |                                                                                  |                                                                                                                                                                                                                                                                                                                                                                                                                                                                                                                                                                                                                                                                                                                                                                                                                                                                                                                                                                                                                                                                                                                                                                                                                                                                                                                                                                                                                                                                               |      |                                      |     |                                                                                                                                                                                                                                                                                                                                                                                                                                                                                                                                                                                          |      |                                                                                                                                                                                                                                                                                                                                                                            |              |                                                                                              |     |              |       |              |                   |                                                                                                               |           |              |                                                                                                                                                                                                                                                                                                                                                                                                            |                                                                                                                                                                    |
| Tailoring                       | -                                                                                                                                                                                                                                                                                                                                                                                                                                                                                                                                                                                        |                                                                                                                                                                                                                                                                                                                                                                                                                                                                                                                                                                                                                                                                                                                                                                                                  |   |                                                                         |     |                                                  |               |    |        |          |      |           |         |    |                    |   |   |                   |   |   |       |   |   |                                                                                  |                                                                                                                                                                                                                                                                                                                                                                                                                                                                                                                                                                                                                                                                                                                                                                                                                                                                                                                                                                                                                                                                                                                                                                                                                                                                                                                                                                                                                                                                               |      |                                      |     |                                                                                                                                                                                                                                                                                                                                                                                                                                                                                                                                                                                          |      |                                                                                                                                                                                                                                                                                                                                                                            |              |                                                                                              |     |              |       |              |                   |                                                                                                               |           |              |                                                                                                                                                                                                                                                                                                                                                                                                            |                                                                                                                                                                    |

|                            |                                                                                                                                                                                                                                                                                                                                                                                                                                                                                                                                                                                                                 |                                                                                                                                                                                                                                                                                                                                                                                                                                                                                                                                                                                    |   |  |    |     |       |       |        |          |   |           |   |   |                    |   |   |                   |   |   |       |   |   |                                                                                       |                                                                                                                                                                                                                                                                                                                                                                                                                                                                                                                                                                                                                                                                                                                                                                                                                                                                                                                                                                                                                                                                                                                                                                                                                                                                                                                                                                                                                                                                                                                                                                                                                                                              |      |                                            |     |                                                                                                                                                                                                                                                                                                                                                                                                                                                                                                                                                                                                                 |      |                                                                                                                                                                                                                                                                                                                                                                                                                                                                                                                                                                   |              |                     |     |              |       |   |                   |          |           |              |                                                                                                                                                                                                                                                                                                                                                                                                                                                                                                                                                                                                                                   |                                                                                                                                                                |
|----------------------------|-----------------------------------------------------------------------------------------------------------------------------------------------------------------------------------------------------------------------------------------------------------------------------------------------------------------------------------------------------------------------------------------------------------------------------------------------------------------------------------------------------------------------------------------------------------------------------------------------------------------|------------------------------------------------------------------------------------------------------------------------------------------------------------------------------------------------------------------------------------------------------------------------------------------------------------------------------------------------------------------------------------------------------------------------------------------------------------------------------------------------------------------------------------------------------------------------------------|---|--|----|-----|-------|-------|--------|----------|---|-----------|---|---|--------------------|---|---|-------------------|---|---|-------|---|---|---------------------------------------------------------------------------------------|--------------------------------------------------------------------------------------------------------------------------------------------------------------------------------------------------------------------------------------------------------------------------------------------------------------------------------------------------------------------------------------------------------------------------------------------------------------------------------------------------------------------------------------------------------------------------------------------------------------------------------------------------------------------------------------------------------------------------------------------------------------------------------------------------------------------------------------------------------------------------------------------------------------------------------------------------------------------------------------------------------------------------------------------------------------------------------------------------------------------------------------------------------------------------------------------------------------------------------------------------------------------------------------------------------------------------------------------------------------------------------------------------------------------------------------------------------------------------------------------------------------------------------------------------------------------------------------------------------------------------------------------------------------|------|--------------------------------------------|-----|-----------------------------------------------------------------------------------------------------------------------------------------------------------------------------------------------------------------------------------------------------------------------------------------------------------------------------------------------------------------------------------------------------------------------------------------------------------------------------------------------------------------------------------------------------------------------------------------------------------------|------|-------------------------------------------------------------------------------------------------------------------------------------------------------------------------------------------------------------------------------------------------------------------------------------------------------------------------------------------------------------------------------------------------------------------------------------------------------------------------------------------------------------------------------------------------------------------|--------------|---------------------|-----|--------------|-------|---|-------------------|----------|-----------|--------------|-----------------------------------------------------------------------------------------------------------------------------------------------------------------------------------------------------------------------------------------------------------------------------------------------------------------------------------------------------------------------------------------------------------------------------------------------------------------------------------------------------------------------------------------------------------------------------------------------------------------------------------|----------------------------------------------------------------------------------------------------------------------------------------------------------------|
| <p>Howarth 2020 (68)</p>   | <p>Uncontrolled before-and-after study, mixed-methods</p> <p>Study length: -</p>                                                                                                                                                                                                                                                                                                                                                                                                                                                                                                                                | <p><b>Inclusion criteria:</b> -</p> <p><b>Exclusion criteria:</b>-</p> <p>Baseline characteristics:</p> <table border="1" data-bbox="477 310 1071 636"> <tr> <td>N</td> <td></td> <td>47</td> </tr> <tr> <td>Age</td> <td>Range</td> <td>30-85</td> </tr> <tr> <td>Gender</td> <td>Female %</td> <td>-</td> </tr> <tr> <td>Ethnicity</td> <td>-</td> <td>-</td> </tr> <tr> <td>Living arrangement</td> <td>-</td> <td>-</td> </tr> <tr> <td>Employment status</td> <td>-</td> <td>-</td> </tr> <tr> <td>Other</td> <td>-</td> <td>-</td> </tr> </table> <p>Population: General</p> | N |  | 47 | Age | Range | 30-85 | Gender | Female % | - | Ethnicity | - | - | Living arrangement | - | - | Employment status | - | - | Other | - | - | <p>Primary Care</p> <p>Country:</p> <p>UK (Salford, Greater Manchester, England)</p>  | <table border="1" data-bbox="1308 226 2228 793"> <tr> <td>Name</td> <td>Bridgewater Therapeutic Garden</td> </tr> <tr> <td>Why</td> <td>Create a sanctuary that offers space to grow, space to reflect and space to meet others and get moving<br/><br/>-help people to heal while reversing the challenges and potential negative health and environmental impacts of the philosophical challenge of the nature deficit disorder, to provide a place of belonging in order to reverse the challenges of social isolation</td> </tr> <tr> <td>What</td> <td>Community Nurses in the locality refer patients to the link worker and help promote this asset based, salutogenic approach to wellbeing.</td> </tr> <tr> <td>Who provided</td> <td>Link worker</td> </tr> <tr> <td>How</td> <td>Face-to-face</td> </tr> <tr> <td>Where</td> <td>-</td> </tr> <tr> <td>When and How Much</td> <td>12 weeks</td> </tr> <tr> <td>Tailoring</td> <td>-</td> </tr> </table> <p>Intervention: Medium</p>                                                                                                                                                                                                                                                                                                                                                                                                                                                                                                                                                                                                                                                               | Name | Bridgewater Therapeutic Garden             | Why | Create a sanctuary that offers space to grow, space to reflect and space to meet others and get moving<br><br>-help people to heal while reversing the challenges and potential negative health and environmental impacts of the philosophical challenge of the nature deficit disorder, to provide a place of belonging in order to reverse the challenges of social isolation                                                                                                                                                                                                                                 | What | Community Nurses in the locality refer patients to the link worker and help promote this asset based, salutogenic approach to wellbeing.                                                                                                                                                                                                                                                                                                                                                                                                                          | Who provided | Link worker         | How | Face-to-face | Where | - | When and How Much | 12 weeks | Tailoring | -            | <p>Patient outcomes at baseline and unspecified endpoint (unclear timepoint):</p> <ul style="list-style-type: none"> <li>- Short Warwick Edinburgh Mental Wellbeing Scale (SWEMWBS)</li> </ul>                                                                                                                                                                                                                                                                                                                                                                                                                                    | <p>Peer-Review: Yes</p> <p>Funding source: -</p> <p>Declaration of interest: None declared</p>                                                                 |
| N                          |                                                                                                                                                                                                                                                                                                                                                                                                                                                                                                                                                                                                                 | 47                                                                                                                                                                                                                                                                                                                                                                                                                                                                                                                                                                                 |   |  |    |     |       |       |        |          |   |           |   |   |                    |   |   |                   |   |   |       |   |   |                                                                                       |                                                                                                                                                                                                                                                                                                                                                                                                                                                                                                                                                                                                                                                                                                                                                                                                                                                                                                                                                                                                                                                                                                                                                                                                                                                                                                                                                                                                                                                                                                                                                                                                                                                              |      |                                            |     |                                                                                                                                                                                                                                                                                                                                                                                                                                                                                                                                                                                                                 |      |                                                                                                                                                                                                                                                                                                                                                                                                                                                                                                                                                                   |              |                     |     |              |       |   |                   |          |           |              |                                                                                                                                                                                                                                                                                                                                                                                                                                                                                                                                                                                                                                   |                                                                                                                                                                |
| Age                        | Range                                                                                                                                                                                                                                                                                                                                                                                                                                                                                                                                                                                                           | 30-85                                                                                                                                                                                                                                                                                                                                                                                                                                                                                                                                                                              |   |  |    |     |       |       |        |          |   |           |   |   |                    |   |   |                   |   |   |       |   |   |                                                                                       |                                                                                                                                                                                                                                                                                                                                                                                                                                                                                                                                                                                                                                                                                                                                                                                                                                                                                                                                                                                                                                                                                                                                                                                                                                                                                                                                                                                                                                                                                                                                                                                                                                                              |      |                                            |     |                                                                                                                                                                                                                                                                                                                                                                                                                                                                                                                                                                                                                 |      |                                                                                                                                                                                                                                                                                                                                                                                                                                                                                                                                                                   |              |                     |     |              |       |   |                   |          |           |              |                                                                                                                                                                                                                                                                                                                                                                                                                                                                                                                                                                                                                                   |                                                                                                                                                                |
| Gender                     | Female %                                                                                                                                                                                                                                                                                                                                                                                                                                                                                                                                                                                                        | -                                                                                                                                                                                                                                                                                                                                                                                                                                                                                                                                                                                  |   |  |    |     |       |       |        |          |   |           |   |   |                    |   |   |                   |   |   |       |   |   |                                                                                       |                                                                                                                                                                                                                                                                                                                                                                                                                                                                                                                                                                                                                                                                                                                                                                                                                                                                                                                                                                                                                                                                                                                                                                                                                                                                                                                                                                                                                                                                                                                                                                                                                                                              |      |                                            |     |                                                                                                                                                                                                                                                                                                                                                                                                                                                                                                                                                                                                                 |      |                                                                                                                                                                                                                                                                                                                                                                                                                                                                                                                                                                   |              |                     |     |              |       |   |                   |          |           |              |                                                                                                                                                                                                                                                                                                                                                                                                                                                                                                                                                                                                                                   |                                                                                                                                                                |
| Ethnicity                  | -                                                                                                                                                                                                                                                                                                                                                                                                                                                                                                                                                                                                               | -                                                                                                                                                                                                                                                                                                                                                                                                                                                                                                                                                                                  |   |  |    |     |       |       |        |          |   |           |   |   |                    |   |   |                   |   |   |       |   |   |                                                                                       |                                                                                                                                                                                                                                                                                                                                                                                                                                                                                                                                                                                                                                                                                                                                                                                                                                                                                                                                                                                                                                                                                                                                                                                                                                                                                                                                                                                                                                                                                                                                                                                                                                                              |      |                                            |     |                                                                                                                                                                                                                                                                                                                                                                                                                                                                                                                                                                                                                 |      |                                                                                                                                                                                                                                                                                                                                                                                                                                                                                                                                                                   |              |                     |     |              |       |   |                   |          |           |              |                                                                                                                                                                                                                                                                                                                                                                                                                                                                                                                                                                                                                                   |                                                                                                                                                                |
| Living arrangement         | -                                                                                                                                                                                                                                                                                                                                                                                                                                                                                                                                                                                                               | -                                                                                                                                                                                                                                                                                                                                                                                                                                                                                                                                                                                  |   |  |    |     |       |       |        |          |   |           |   |   |                    |   |   |                   |   |   |       |   |   |                                                                                       |                                                                                                                                                                                                                                                                                                                                                                                                                                                                                                                                                                                                                                                                                                                                                                                                                                                                                                                                                                                                                                                                                                                                                                                                                                                                                                                                                                                                                                                                                                                                                                                                                                                              |      |                                            |     |                                                                                                                                                                                                                                                                                                                                                                                                                                                                                                                                                                                                                 |      |                                                                                                                                                                                                                                                                                                                                                                                                                                                                                                                                                                   |              |                     |     |              |       |   |                   |          |           |              |                                                                                                                                                                                                                                                                                                                                                                                                                                                                                                                                                                                                                                   |                                                                                                                                                                |
| Employment status          | -                                                                                                                                                                                                                                                                                                                                                                                                                                                                                                                                                                                                               | -                                                                                                                                                                                                                                                                                                                                                                                                                                                                                                                                                                                  |   |  |    |     |       |       |        |          |   |           |   |   |                    |   |   |                   |   |   |       |   |   |                                                                                       |                                                                                                                                                                                                                                                                                                                                                                                                                                                                                                                                                                                                                                                                                                                                                                                                                                                                                                                                                                                                                                                                                                                                                                                                                                                                                                                                                                                                                                                                                                                                                                                                                                                              |      |                                            |     |                                                                                                                                                                                                                                                                                                                                                                                                                                                                                                                                                                                                                 |      |                                                                                                                                                                                                                                                                                                                                                                                                                                                                                                                                                                   |              |                     |     |              |       |   |                   |          |           |              |                                                                                                                                                                                                                                                                                                                                                                                                                                                                                                                                                                                                                                   |                                                                                                                                                                |
| Other                      | -                                                                                                                                                                                                                                                                                                                                                                                                                                                                                                                                                                                                               | -                                                                                                                                                                                                                                                                                                                                                                                                                                                                                                                                                                                  |   |  |    |     |       |       |        |          |   |           |   |   |                    |   |   |                   |   |   |       |   |   |                                                                                       |                                                                                                                                                                                                                                                                                                                                                                                                                                                                                                                                                                                                                                                                                                                                                                                                                                                                                                                                                                                                                                                                                                                                                                                                                                                                                                                                                                                                                                                                                                                                                                                                                                                              |      |                                            |     |                                                                                                                                                                                                                                                                                                                                                                                                                                                                                                                                                                                                                 |      |                                                                                                                                                                                                                                                                                                                                                                                                                                                                                                                                                                   |              |                     |     |              |       |   |                   |          |           |              |                                                                                                                                                                                                                                                                                                                                                                                                                                                                                                                                                                                                                                   |                                                                                                                                                                |
| Name                       | Bridgewater Therapeutic Garden                                                                                                                                                                                                                                                                                                                                                                                                                                                                                                                                                                                  |                                                                                                                                                                                                                                                                                                                                                                                                                                                                                                                                                                                    |   |  |    |     |       |       |        |          |   |           |   |   |                    |   |   |                   |   |   |       |   |   |                                                                                       |                                                                                                                                                                                                                                                                                                                                                                                                                                                                                                                                                                                                                                                                                                                                                                                                                                                                                                                                                                                                                                                                                                                                                                                                                                                                                                                                                                                                                                                                                                                                                                                                                                                              |      |                                            |     |                                                                                                                                                                                                                                                                                                                                                                                                                                                                                                                                                                                                                 |      |                                                                                                                                                                                                                                                                                                                                                                                                                                                                                                                                                                   |              |                     |     |              |       |   |                   |          |           |              |                                                                                                                                                                                                                                                                                                                                                                                                                                                                                                                                                                                                                                   |                                                                                                                                                                |
| Why                        | Create a sanctuary that offers space to grow, space to reflect and space to meet others and get moving<br><br>-help people to heal while reversing the challenges and potential negative health and environmental impacts of the philosophical challenge of the nature deficit disorder, to provide a place of belonging in order to reverse the challenges of social isolation                                                                                                                                                                                                                                 |                                                                                                                                                                                                                                                                                                                                                                                                                                                                                                                                                                                    |   |  |    |     |       |       |        |          |   |           |   |   |                    |   |   |                   |   |   |       |   |   |                                                                                       |                                                                                                                                                                                                                                                                                                                                                                                                                                                                                                                                                                                                                                                                                                                                                                                                                                                                                                                                                                                                                                                                                                                                                                                                                                                                                                                                                                                                                                                                                                                                                                                                                                                              |      |                                            |     |                                                                                                                                                                                                                                                                                                                                                                                                                                                                                                                                                                                                                 |      |                                                                                                                                                                                                                                                                                                                                                                                                                                                                                                                                                                   |              |                     |     |              |       |   |                   |          |           |              |                                                                                                                                                                                                                                                                                                                                                                                                                                                                                                                                                                                                                                   |                                                                                                                                                                |
| What                       | Community Nurses in the locality refer patients to the link worker and help promote this asset based, salutogenic approach to wellbeing.                                                                                                                                                                                                                                                                                                                                                                                                                                                                        |                                                                                                                                                                                                                                                                                                                                                                                                                                                                                                                                                                                    |   |  |    |     |       |       |        |          |   |           |   |   |                    |   |   |                   |   |   |       |   |   |                                                                                       |                                                                                                                                                                                                                                                                                                                                                                                                                                                                                                                                                                                                                                                                                                                                                                                                                                                                                                                                                                                                                                                                                                                                                                                                                                                                                                                                                                                                                                                                                                                                                                                                                                                              |      |                                            |     |                                                                                                                                                                                                                                                                                                                                                                                                                                                                                                                                                                                                                 |      |                                                                                                                                                                                                                                                                                                                                                                                                                                                                                                                                                                   |              |                     |     |              |       |   |                   |          |           |              |                                                                                                                                                                                                                                                                                                                                                                                                                                                                                                                                                                                                                                   |                                                                                                                                                                |
| Who provided               | Link worker                                                                                                                                                                                                                                                                                                                                                                                                                                                                                                                                                                                                     |                                                                                                                                                                                                                                                                                                                                                                                                                                                                                                                                                                                    |   |  |    |     |       |       |        |          |   |           |   |   |                    |   |   |                   |   |   |       |   |   |                                                                                       |                                                                                                                                                                                                                                                                                                                                                                                                                                                                                                                                                                                                                                                                                                                                                                                                                                                                                                                                                                                                                                                                                                                                                                                                                                                                                                                                                                                                                                                                                                                                                                                                                                                              |      |                                            |     |                                                                                                                                                                                                                                                                                                                                                                                                                                                                                                                                                                                                                 |      |                                                                                                                                                                                                                                                                                                                                                                                                                                                                                                                                                                   |              |                     |     |              |       |   |                   |          |           |              |                                                                                                                                                                                                                                                                                                                                                                                                                                                                                                                                                                                                                                   |                                                                                                                                                                |
| How                        | Face-to-face                                                                                                                                                                                                                                                                                                                                                                                                                                                                                                                                                                                                    |                                                                                                                                                                                                                                                                                                                                                                                                                                                                                                                                                                                    |   |  |    |     |       |       |        |          |   |           |   |   |                    |   |   |                   |   |   |       |   |   |                                                                                       |                                                                                                                                                                                                                                                                                                                                                                                                                                                                                                                                                                                                                                                                                                                                                                                                                                                                                                                                                                                                                                                                                                                                                                                                                                                                                                                                                                                                                                                                                                                                                                                                                                                              |      |                                            |     |                                                                                                                                                                                                                                                                                                                                                                                                                                                                                                                                                                                                                 |      |                                                                                                                                                                                                                                                                                                                                                                                                                                                                                                                                                                   |              |                     |     |              |       |   |                   |          |           |              |                                                                                                                                                                                                                                                                                                                                                                                                                                                                                                                                                                                                                                   |                                                                                                                                                                |
| Where                      | -                                                                                                                                                                                                                                                                                                                                                                                                                                                                                                                                                                                                               |                                                                                                                                                                                                                                                                                                                                                                                                                                                                                                                                                                                    |   |  |    |     |       |       |        |          |   |           |   |   |                    |   |   |                   |   |   |       |   |   |                                                                                       |                                                                                                                                                                                                                                                                                                                                                                                                                                                                                                                                                                                                                                                                                                                                                                                                                                                                                                                                                                                                                                                                                                                                                                                                                                                                                                                                                                                                                                                                                                                                                                                                                                                              |      |                                            |     |                                                                                                                                                                                                                                                                                                                                                                                                                                                                                                                                                                                                                 |      |                                                                                                                                                                                                                                                                                                                                                                                                                                                                                                                                                                   |              |                     |     |              |       |   |                   |          |           |              |                                                                                                                                                                                                                                                                                                                                                                                                                                                                                                                                                                                                                                   |                                                                                                                                                                |
| When and How Much          | 12 weeks                                                                                                                                                                                                                                                                                                                                                                                                                                                                                                                                                                                                        |                                                                                                                                                                                                                                                                                                                                                                                                                                                                                                                                                                                    |   |  |    |     |       |       |        |          |   |           |   |   |                    |   |   |                   |   |   |       |   |   |                                                                                       |                                                                                                                                                                                                                                                                                                                                                                                                                                                                                                                                                                                                                                                                                                                                                                                                                                                                                                                                                                                                                                                                                                                                                                                                                                                                                                                                                                                                                                                                                                                                                                                                                                                              |      |                                            |     |                                                                                                                                                                                                                                                                                                                                                                                                                                                                                                                                                                                                                 |      |                                                                                                                                                                                                                                                                                                                                                                                                                                                                                                                                                                   |              |                     |     |              |       |   |                   |          |           |              |                                                                                                                                                                                                                                                                                                                                                                                                                                                                                                                                                                                                                                   |                                                                                                                                                                |
| Tailoring                  | -                                                                                                                                                                                                                                                                                                                                                                                                                                                                                                                                                                                                               |                                                                                                                                                                                                                                                                                                                                                                                                                                                                                                                                                                                    |   |  |    |     |       |       |        |          |   |           |   |   |                    |   |   |                   |   |   |       |   |   |                                                                                       |                                                                                                                                                                                                                                                                                                                                                                                                                                                                                                                                                                                                                                                                                                                                                                                                                                                                                                                                                                                                                                                                                                                                                                                                                                                                                                                                                                                                                                                                                                                                                                                                                                                              |      |                                            |     |                                                                                                                                                                                                                                                                                                                                                                                                                                                                                                                                                                                                                 |      |                                                                                                                                                                                                                                                                                                                                                                                                                                                                                                                                                                   |              |                     |     |              |       |   |                   |          |           |              |                                                                                                                                                                                                                                                                                                                                                                                                                                                                                                                                                                                                                                   |                                                                                                                                                                |
| <p>Jones 2018 (a) (69)</p> | <p>Uncontrolled before-and-after study, mixed-methods</p> <p>Study length: 17 months</p>                                                                                                                                                                                                                                                                                                                                                                                                                                                                                                                        | <p><b>Inclusion criteria:</b> -</p> <p><b>Exclusion criteria:</b> -</p> <p>Baseline characteristics:</p> <table border="1" data-bbox="477 1060 1071 1386"> <tr> <td>N</td> <td></td> <td>78</td> </tr> <tr> <td>Age</td> <td>-</td> <td>-</td> </tr> <tr> <td>Gender</td> <td>-</td> <td>-</td> </tr> <tr> <td>Ethnicity</td> <td>-</td> <td>-</td> </tr> <tr> <td>Living arrangement</td> <td>-</td> <td>-</td> </tr> <tr> <td>Employment status</td> <td>-</td> <td>-</td> </tr> <tr> <td>Other</td> <td>-</td> <td>-</td> </tr> </table> <p>Population: Unclear</p>             | N |  | 78 | Age | -     | -     | Gender | -        | - | Ethnicity | - | - | Living arrangement | - | - | Employment status | - | - | Other | - | - | <p>Primary care</p> <p>UK (South West Cardiff, City and County of Cardiff, Wales)</p> | <table border="1" data-bbox="1308 976 2228 1869"> <tr> <td>Name</td> <td>SPICE Time Credit Social Prescribing Model</td> </tr> <tr> <td>Why</td> <td>The Welsh health and care system is struggling to balance increased demands with reduced expenditure<br/><br/>- around 20% of patients consult their GP for psychosocial problems, it has been argued that psychosocial issues and long-term conditions can be better managed in the community<br/><br/>-s.p. can offer an alternative to the traditional medical models and reduce the burden on the NHS<br/><br/>- increased levels of community and social participation has a positive impact on health behaviours, physical and emotional health and self-confidence, especially among disadvantaged populations</td> </tr> <tr> <td>What</td> <td>'Social Prescribing Time Credit Model':<br/><br/>- patients and community members are 'prescribed' a small number of TC by the social prescriber(s) based in the GP practice(s) pledging their time to earn in the future, this enables them to access a wide range of activities that they are interested in, spending time credits, and to identify a way they can play a positive role in the community through earning by volunteering<br/><br/>- this supports the voluntary sector to work with increased numbers of patients signposted via social prescribing</td> </tr> <tr> <td>Who provided</td> <td>2 social prescriber</td> </tr> <tr> <td>How</td> <td>Face-to-face</td> </tr> <tr> <td>Where</td> <td>-</td> </tr> <tr> <td>When and How Much</td> <td>-</td> </tr> <tr> <td>Tailoring</td> <td>Personalized</td> </tr> </table> | Name | SPICE Time Credit Social Prescribing Model | Why | The Welsh health and care system is struggling to balance increased demands with reduced expenditure<br><br>- around 20% of patients consult their GP for psychosocial problems, it has been argued that psychosocial issues and long-term conditions can be better managed in the community<br><br>-s.p. can offer an alternative to the traditional medical models and reduce the burden on the NHS<br><br>- increased levels of community and social participation has a positive impact on health behaviours, physical and emotional health and self-confidence, especially among disadvantaged populations | What | 'Social Prescribing Time Credit Model':<br><br>- patients and community members are 'prescribed' a small number of TC by the social prescriber(s) based in the GP practice(s) pledging their time to earn in the future, this enables them to access a wide range of activities that they are interested in, spending time credits, and to identify a way they can play a positive role in the community through earning by volunteering<br><br>- this supports the voluntary sector to work with increased numbers of patients signposted via social prescribing | Who provided | 2 social prescriber | How | Face-to-face | Where | - | When and How Much | -        | Tailoring | Personalized | <p>Patient outcomes (pre and post intervention collected by the social prescribers anonymised with coded unique patient numbers):</p> <ul style="list-style-type: none"> <li>- Warwick Edinburgh, Mental Wellbeing Scale* (WEMWBS)</li> </ul> <p>Process of care measures (12 months prior to intervention and at the end of the pilot from the GP Vision system (anonymised with unique patient numbers)):</p> <ul style="list-style-type: none"> <li>- GP appointments per person per year (extrapolated) Change*</li> <li>- current condition*</li> <li>- medication use*</li> <li>- unplanned hospital admission *</li> </ul> | <p>Peer-Review: no</p> <p>Funding source: Welsh Government, I2S fund</p> <p>SPICE: social enterprise founded</p> <p>Declaration of interest: Not mentioned</p> |
| N                          |                                                                                                                                                                                                                                                                                                                                                                                                                                                                                                                                                                                                                 | 78                                                                                                                                                                                                                                                                                                                                                                                                                                                                                                                                                                                 |   |  |    |     |       |       |        |          |   |           |   |   |                    |   |   |                   |   |   |       |   |   |                                                                                       |                                                                                                                                                                                                                                                                                                                                                                                                                                                                                                                                                                                                                                                                                                                                                                                                                                                                                                                                                                                                                                                                                                                                                                                                                                                                                                                                                                                                                                                                                                                                                                                                                                                              |      |                                            |     |                                                                                                                                                                                                                                                                                                                                                                                                                                                                                                                                                                                                                 |      |                                                                                                                                                                                                                                                                                                                                                                                                                                                                                                                                                                   |              |                     |     |              |       |   |                   |          |           |              |                                                                                                                                                                                                                                                                                                                                                                                                                                                                                                                                                                                                                                   |                                                                                                                                                                |
| Age                        | -                                                                                                                                                                                                                                                                                                                                                                                                                                                                                                                                                                                                               | -                                                                                                                                                                                                                                                                                                                                                                                                                                                                                                                                                                                  |   |  |    |     |       |       |        |          |   |           |   |   |                    |   |   |                   |   |   |       |   |   |                                                                                       |                                                                                                                                                                                                                                                                                                                                                                                                                                                                                                                                                                                                                                                                                                                                                                                                                                                                                                                                                                                                                                                                                                                                                                                                                                                                                                                                                                                                                                                                                                                                                                                                                                                              |      |                                            |     |                                                                                                                                                                                                                                                                                                                                                                                                                                                                                                                                                                                                                 |      |                                                                                                                                                                                                                                                                                                                                                                                                                                                                                                                                                                   |              |                     |     |              |       |   |                   |          |           |              |                                                                                                                                                                                                                                                                                                                                                                                                                                                                                                                                                                                                                                   |                                                                                                                                                                |
| Gender                     | -                                                                                                                                                                                                                                                                                                                                                                                                                                                                                                                                                                                                               | -                                                                                                                                                                                                                                                                                                                                                                                                                                                                                                                                                                                  |   |  |    |     |       |       |        |          |   |           |   |   |                    |   |   |                   |   |   |       |   |   |                                                                                       |                                                                                                                                                                                                                                                                                                                                                                                                                                                                                                                                                                                                                                                                                                                                                                                                                                                                                                                                                                                                                                                                                                                                                                                                                                                                                                                                                                                                                                                                                                                                                                                                                                                              |      |                                            |     |                                                                                                                                                                                                                                                                                                                                                                                                                                                                                                                                                                                                                 |      |                                                                                                                                                                                                                                                                                                                                                                                                                                                                                                                                                                   |              |                     |     |              |       |   |                   |          |           |              |                                                                                                                                                                                                                                                                                                                                                                                                                                                                                                                                                                                                                                   |                                                                                                                                                                |
| Ethnicity                  | -                                                                                                                                                                                                                                                                                                                                                                                                                                                                                                                                                                                                               | -                                                                                                                                                                                                                                                                                                                                                                                                                                                                                                                                                                                  |   |  |    |     |       |       |        |          |   |           |   |   |                    |   |   |                   |   |   |       |   |   |                                                                                       |                                                                                                                                                                                                                                                                                                                                                                                                                                                                                                                                                                                                                                                                                                                                                                                                                                                                                                                                                                                                                                                                                                                                                                                                                                                                                                                                                                                                                                                                                                                                                                                                                                                              |      |                                            |     |                                                                                                                                                                                                                                                                                                                                                                                                                                                                                                                                                                                                                 |      |                                                                                                                                                                                                                                                                                                                                                                                                                                                                                                                                                                   |              |                     |     |              |       |   |                   |          |           |              |                                                                                                                                                                                                                                                                                                                                                                                                                                                                                                                                                                                                                                   |                                                                                                                                                                |
| Living arrangement         | -                                                                                                                                                                                                                                                                                                                                                                                                                                                                                                                                                                                                               | -                                                                                                                                                                                                                                                                                                                                                                                                                                                                                                                                                                                  |   |  |    |     |       |       |        |          |   |           |   |   |                    |   |   |                   |   |   |       |   |   |                                                                                       |                                                                                                                                                                                                                                                                                                                                                                                                                                                                                                                                                                                                                                                                                                                                                                                                                                                                                                                                                                                                                                                                                                                                                                                                                                                                                                                                                                                                                                                                                                                                                                                                                                                              |      |                                            |     |                                                                                                                                                                                                                                                                                                                                                                                                                                                                                                                                                                                                                 |      |                                                                                                                                                                                                                                                                                                                                                                                                                                                                                                                                                                   |              |                     |     |              |       |   |                   |          |           |              |                                                                                                                                                                                                                                                                                                                                                                                                                                                                                                                                                                                                                                   |                                                                                                                                                                |
| Employment status          | -                                                                                                                                                                                                                                                                                                                                                                                                                                                                                                                                                                                                               | -                                                                                                                                                                                                                                                                                                                                                                                                                                                                                                                                                                                  |   |  |    |     |       |       |        |          |   |           |   |   |                    |   |   |                   |   |   |       |   |   |                                                                                       |                                                                                                                                                                                                                                                                                                                                                                                                                                                                                                                                                                                                                                                                                                                                                                                                                                                                                                                                                                                                                                                                                                                                                                                                                                                                                                                                                                                                                                                                                                                                                                                                                                                              |      |                                            |     |                                                                                                                                                                                                                                                                                                                                                                                                                                                                                                                                                                                                                 |      |                                                                                                                                                                                                                                                                                                                                                                                                                                                                                                                                                                   |              |                     |     |              |       |   |                   |          |           |              |                                                                                                                                                                                                                                                                                                                                                                                                                                                                                                                                                                                                                                   |                                                                                                                                                                |
| Other                      | -                                                                                                                                                                                                                                                                                                                                                                                                                                                                                                                                                                                                               | -                                                                                                                                                                                                                                                                                                                                                                                                                                                                                                                                                                                  |   |  |    |     |       |       |        |          |   |           |   |   |                    |   |   |                   |   |   |       |   |   |                                                                                       |                                                                                                                                                                                                                                                                                                                                                                                                                                                                                                                                                                                                                                                                                                                                                                                                                                                                                                                                                                                                                                                                                                                                                                                                                                                                                                                                                                                                                                                                                                                                                                                                                                                              |      |                                            |     |                                                                                                                                                                                                                                                                                                                                                                                                                                                                                                                                                                                                                 |      |                                                                                                                                                                                                                                                                                                                                                                                                                                                                                                                                                                   |              |                     |     |              |       |   |                   |          |           |              |                                                                                                                                                                                                                                                                                                                                                                                                                                                                                                                                                                                                                                   |                                                                                                                                                                |
| Name                       | SPICE Time Credit Social Prescribing Model                                                                                                                                                                                                                                                                                                                                                                                                                                                                                                                                                                      |                                                                                                                                                                                                                                                                                                                                                                                                                                                                                                                                                                                    |   |  |    |     |       |       |        |          |   |           |   |   |                    |   |   |                   |   |   |       |   |   |                                                                                       |                                                                                                                                                                                                                                                                                                                                                                                                                                                                                                                                                                                                                                                                                                                                                                                                                                                                                                                                                                                                                                                                                                                                                                                                                                                                                                                                                                                                                                                                                                                                                                                                                                                              |      |                                            |     |                                                                                                                                                                                                                                                                                                                                                                                                                                                                                                                                                                                                                 |      |                                                                                                                                                                                                                                                                                                                                                                                                                                                                                                                                                                   |              |                     |     |              |       |   |                   |          |           |              |                                                                                                                                                                                                                                                                                                                                                                                                                                                                                                                                                                                                                                   |                                                                                                                                                                |
| Why                        | The Welsh health and care system is struggling to balance increased demands with reduced expenditure<br><br>- around 20% of patients consult their GP for psychosocial problems, it has been argued that psychosocial issues and long-term conditions can be better managed in the community<br><br>-s.p. can offer an alternative to the traditional medical models and reduce the burden on the NHS<br><br>- increased levels of community and social participation has a positive impact on health behaviours, physical and emotional health and self-confidence, especially among disadvantaged populations |                                                                                                                                                                                                                                                                                                                                                                                                                                                                                                                                                                                    |   |  |    |     |       |       |        |          |   |           |   |   |                    |   |   |                   |   |   |       |   |   |                                                                                       |                                                                                                                                                                                                                                                                                                                                                                                                                                                                                                                                                                                                                                                                                                                                                                                                                                                                                                                                                                                                                                                                                                                                                                                                                                                                                                                                                                                                                                                                                                                                                                                                                                                              |      |                                            |     |                                                                                                                                                                                                                                                                                                                                                                                                                                                                                                                                                                                                                 |      |                                                                                                                                                                                                                                                                                                                                                                                                                                                                                                                                                                   |              |                     |     |              |       |   |                   |          |           |              |                                                                                                                                                                                                                                                                                                                                                                                                                                                                                                                                                                                                                                   |                                                                                                                                                                |
| What                       | 'Social Prescribing Time Credit Model':<br><br>- patients and community members are 'prescribed' a small number of TC by the social prescriber(s) based in the GP practice(s) pledging their time to earn in the future, this enables them to access a wide range of activities that they are interested in, spending time credits, and to identify a way they can play a positive role in the community through earning by volunteering<br><br>- this supports the voluntary sector to work with increased numbers of patients signposted via social prescribing                                               |                                                                                                                                                                                                                                                                                                                                                                                                                                                                                                                                                                                    |   |  |    |     |       |       |        |          |   |           |   |   |                    |   |   |                   |   |   |       |   |   |                                                                                       |                                                                                                                                                                                                                                                                                                                                                                                                                                                                                                                                                                                                                                                                                                                                                                                                                                                                                                                                                                                                                                                                                                                                                                                                                                                                                                                                                                                                                                                                                                                                                                                                                                                              |      |                                            |     |                                                                                                                                                                                                                                                                                                                                                                                                                                                                                                                                                                                                                 |      |                                                                                                                                                                                                                                                                                                                                                                                                                                                                                                                                                                   |              |                     |     |              |       |   |                   |          |           |              |                                                                                                                                                                                                                                                                                                                                                                                                                                                                                                                                                                                                                                   |                                                                                                                                                                |
| Who provided               | 2 social prescriber                                                                                                                                                                                                                                                                                                                                                                                                                                                                                                                                                                                             |                                                                                                                                                                                                                                                                                                                                                                                                                                                                                                                                                                                    |   |  |    |     |       |       |        |          |   |           |   |   |                    |   |   |                   |   |   |       |   |   |                                                                                       |                                                                                                                                                                                                                                                                                                                                                                                                                                                                                                                                                                                                                                                                                                                                                                                                                                                                                                                                                                                                                                                                                                                                                                                                                                                                                                                                                                                                                                                                                                                                                                                                                                                              |      |                                            |     |                                                                                                                                                                                                                                                                                                                                                                                                                                                                                                                                                                                                                 |      |                                                                                                                                                                                                                                                                                                                                                                                                                                                                                                                                                                   |              |                     |     |              |       |   |                   |          |           |              |                                                                                                                                                                                                                                                                                                                                                                                                                                                                                                                                                                                                                                   |                                                                                                                                                                |
| How                        | Face-to-face                                                                                                                                                                                                                                                                                                                                                                                                                                                                                                                                                                                                    |                                                                                                                                                                                                                                                                                                                                                                                                                                                                                                                                                                                    |   |  |    |     |       |       |        |          |   |           |   |   |                    |   |   |                   |   |   |       |   |   |                                                                                       |                                                                                                                                                                                                                                                                                                                                                                                                                                                                                                                                                                                                                                                                                                                                                                                                                                                                                                                                                                                                                                                                                                                                                                                                                                                                                                                                                                                                                                                                                                                                                                                                                                                              |      |                                            |     |                                                                                                                                                                                                                                                                                                                                                                                                                                                                                                                                                                                                                 |      |                                                                                                                                                                                                                                                                                                                                                                                                                                                                                                                                                                   |              |                     |     |              |       |   |                   |          |           |              |                                                                                                                                                                                                                                                                                                                                                                                                                                                                                                                                                                                                                                   |                                                                                                                                                                |
| Where                      | -                                                                                                                                                                                                                                                                                                                                                                                                                                                                                                                                                                                                               |                                                                                                                                                                                                                                                                                                                                                                                                                                                                                                                                                                                    |   |  |    |     |       |       |        |          |   |           |   |   |                    |   |   |                   |   |   |       |   |   |                                                                                       |                                                                                                                                                                                                                                                                                                                                                                                                                                                                                                                                                                                                                                                                                                                                                                                                                                                                                                                                                                                                                                                                                                                                                                                                                                                                                                                                                                                                                                                                                                                                                                                                                                                              |      |                                            |     |                                                                                                                                                                                                                                                                                                                                                                                                                                                                                                                                                                                                                 |      |                                                                                                                                                                                                                                                                                                                                                                                                                                                                                                                                                                   |              |                     |     |              |       |   |                   |          |           |              |                                                                                                                                                                                                                                                                                                                                                                                                                                                                                                                                                                                                                                   |                                                                                                                                                                |
| When and How Much          | -                                                                                                                                                                                                                                                                                                                                                                                                                                                                                                                                                                                                               |                                                                                                                                                                                                                                                                                                                                                                                                                                                                                                                                                                                    |   |  |    |     |       |       |        |          |   |           |   |   |                    |   |   |                   |   |   |       |   |   |                                                                                       |                                                                                                                                                                                                                                                                                                                                                                                                                                                                                                                                                                                                                                                                                                                                                                                                                                                                                                                                                                                                                                                                                                                                                                                                                                                                                                                                                                                                                                                                                                                                                                                                                                                              |      |                                            |     |                                                                                                                                                                                                                                                                                                                                                                                                                                                                                                                                                                                                                 |      |                                                                                                                                                                                                                                                                                                                                                                                                                                                                                                                                                                   |              |                     |     |              |       |   |                   |          |           |              |                                                                                                                                                                                                                                                                                                                                                                                                                                                                                                                                                                                                                                   |                                                                                                                                                                |
| Tailoring                  | Personalized                                                                                                                                                                                                                                                                                                                                                                                                                                                                                                                                                                                                    |                                                                                                                                                                                                                                                                                                                                                                                                                                                                                                                                                                                    |   |  |    |     |       |       |        |          |   |           |   |   |                    |   |   |                   |   |   |       |   |   |                                                                                       |                                                                                                                                                                                                                                                                                                                                                                                                                                                                                                                                                                                                                                                                                                                                                                                                                                                                                                                                                                                                                                                                                                                                                                                                                                                                                                                                                                                                                                                                                                                                                                                                                                                              |      |                                            |     |                                                                                                                                                                                                                                                                                                                                                                                                                                                                                                                                                                                                                 |      |                                                                                                                                                                                                                                                                                                                                                                                                                                                                                                                                                                   |              |                     |     |              |       |   |                   |          |           |              |                                                                                                                                                                                                                                                                                                                                                                                                                                                                                                                                                                                                                                   |                                                                                                                                                                |

|                      |                                                                                                                                                                                                                                                                                                                               |                                                                                                                                                                                                                                                                                                                                                                                                                                                                                                                                                                                                                                                            |                                                    |                                                                                                                                                                                                                                                                                                                                                                                                                                                                                                                             |      |                            |              |                                                                                                                                                                                        |        |                                                                                                                                                                          |                                                                                                                                                                                                                                |                                                    |   |   |                    |   |   |                   |   |   |       |   |   |                        |                                                                                                                                                                                                                                                                                                                                                                                                                                                                                                                                                                                                                                                                                                                                                                                                                                                                                                                                                                                                                                                                                                                                                                |      |                                                 |     |                                                                                                                                                                                                                                                                                                                               |      |                                                                                                                                                                                       |              |                           |     |                                                                                                            |       |                        |                   |                                               |           |              |                                                                                                                                                                                                                                                                                                                                                                                                                                                                                                                                                                                                                                                                                                                                                                                       |                                                                                                                                  |
|----------------------|-------------------------------------------------------------------------------------------------------------------------------------------------------------------------------------------------------------------------------------------------------------------------------------------------------------------------------|------------------------------------------------------------------------------------------------------------------------------------------------------------------------------------------------------------------------------------------------------------------------------------------------------------------------------------------------------------------------------------------------------------------------------------------------------------------------------------------------------------------------------------------------------------------------------------------------------------------------------------------------------------|----------------------------------------------------|-----------------------------------------------------------------------------------------------------------------------------------------------------------------------------------------------------------------------------------------------------------------------------------------------------------------------------------------------------------------------------------------------------------------------------------------------------------------------------------------------------------------------------|------|----------------------------|--------------|----------------------------------------------------------------------------------------------------------------------------------------------------------------------------------------|--------|--------------------------------------------------------------------------------------------------------------------------------------------------------------------------|--------------------------------------------------------------------------------------------------------------------------------------------------------------------------------------------------------------------------------|----------------------------------------------------|---|---|--------------------|---|---|-------------------|---|---|-------|---|---|------------------------|----------------------------------------------------------------------------------------------------------------------------------------------------------------------------------------------------------------------------------------------------------------------------------------------------------------------------------------------------------------------------------------------------------------------------------------------------------------------------------------------------------------------------------------------------------------------------------------------------------------------------------------------------------------------------------------------------------------------------------------------------------------------------------------------------------------------------------------------------------------------------------------------------------------------------------------------------------------------------------------------------------------------------------------------------------------------------------------------------------------------------------------------------------------|------|-------------------------------------------------|-----|-------------------------------------------------------------------------------------------------------------------------------------------------------------------------------------------------------------------------------------------------------------------------------------------------------------------------------|------|---------------------------------------------------------------------------------------------------------------------------------------------------------------------------------------|--------------|---------------------------|-----|------------------------------------------------------------------------------------------------------------|-------|------------------------|-------------------|-----------------------------------------------|-----------|--------------|---------------------------------------------------------------------------------------------------------------------------------------------------------------------------------------------------------------------------------------------------------------------------------------------------------------------------------------------------------------------------------------------------------------------------------------------------------------------------------------------------------------------------------------------------------------------------------------------------------------------------------------------------------------------------------------------------------------------------------------------------------------------------------------|----------------------------------------------------------------------------------------------------------------------------------|
|                      |                                                                                                                                                                                                                                                                                                                               |                                                                                                                                                                                                                                                                                                                                                                                                                                                                                                                                                                                                                                                            |                                                    | Intervention: Light                                                                                                                                                                                                                                                                                                                                                                                                                                                                                                         |      |                            |              |                                                                                                                                                                                        |        |                                                                                                                                                                          |                                                                                                                                                                                                                                |                                                    |   |   |                    |   |   |                   |   |   |       |   |   |                        |                                                                                                                                                                                                                                                                                                                                                                                                                                                                                                                                                                                                                                                                                                                                                                                                                                                                                                                                                                                                                                                                                                                                                                |      |                                                 |     |                                                                                                                                                                                                                                                                                                                               |      |                                                                                                                                                                                       |              |                           |     |                                                                                                            |       |                        |                   |                                               |           |              |                                                                                                                                                                                                                                                                                                                                                                                                                                                                                                                                                                                                                                                                                                                                                                                       |                                                                                                                                  |
| Jones 2018 (b) (70)  | Uncontrolled before-and-after study, mixed-methods<br><br>Study length:<br>7 months                                                                                                                                                                                                                                           | <p><b>Inclusion criteria:</b><br/>- patients with low level anxiety and depression and psychosocial issues</p> <p><b>Exclusion criteria:</b> -</p> <p>Baseline characteristics:</p> <table border="1"> <tr> <td>N</td> <td></td> <td>31</td> </tr> <tr> <td>Age</td> <td>&gt; 45 years %</td> <td>56,3</td> </tr> <tr> <td>Gender</td> <td>-</td> <td>-</td> </tr> <tr> <td>Ethnicity</td> <td>-</td> <td>-</td> </tr> <tr> <td>Living arrangement</td> <td>-</td> <td>-</td> </tr> <tr> <td>Employment status</td> <td>-</td> <td>-</td> </tr> <tr> <td>Other</td> <td>-</td> <td>-</td> </tr> </table> <p>Population: Special (mental health issues)</p> | N                                                  |                                                                                                                                                                                                                                                                                                                                                                                                                                                                                                                             | 31   | Age                        | > 45 years % | 56,3                                                                                                                                                                                   | Gender | -                                                                                                                                                                        | -                                                                                                                                                                                                                              | Ethnicity                                          | - | - | Living arrangement | - | - | Employment status | - | - | Other | - | - | Primary care<br><br>UK | <table border="1"> <tr> <td>Name</td> <td>Grow Cardiff Gardening Social Prescribing pilot</td> </tr> <tr> <td>Why</td> <td>Regular contact with nature can promote positive health behaviours and a regular contact with nature is a form of preventive medicine<br/><br/>- around 20% of patients consult their GP for psychosocial problems, it has been argued that psychosocial issues and long-term conditions can be better managed in the community</td> </tr> <tr> <td>What</td> <td>6-months SP pilot in a local community garden or a garden attached to the surgery<br/><br/>- patients were supervised by a gardener and attended regular gardening sessions once a week</td> </tr> <tr> <td>Who provided</td> <td>Directly through gardener</td> </tr> <tr> <td>How</td> <td>patients identified by GP's and practice staff in 3 surgeries in the SWC GP Cluster were referred directly</td> </tr> <tr> <td>Where</td> <td>Local community garden</td> </tr> <tr> <td>When and How Much</td> <td>Once a week, delivered over a 5-months period</td> </tr> <tr> <td>Tailoring</td> <td>Personalized</td> </tr> </table> <p>Intervention: Light</p> | Name | Grow Cardiff Gardening Social Prescribing pilot | Why | Regular contact with nature can promote positive health behaviours and a regular contact with nature is a form of preventive medicine<br><br>- around 20% of patients consult their GP for psychosocial problems, it has been argued that psychosocial issues and long-term conditions can be better managed in the community | What | 6-months SP pilot in a local community garden or a garden attached to the surgery<br><br>- patients were supervised by a gardener and attended regular gardening sessions once a week | Who provided | Directly through gardener | How | patients identified by GP's and practice staff in 3 surgeries in the SWC GP Cluster were referred directly | Where | Local community garden | When and How Much | Once a week, delivered over a 5-months period | Tailoring | Personalized | <p>Patient outcomes pre and post intervention (collected by gardeners):</p> <ul style="list-style-type: none"> <li>- Warwick Edinburgh, Mental Wellbeing Scale* (WEMWBS)</li> <li>- UCLA Loneliness Scale*</li> <li>- Self-Efficacy for Management of Chronic Disease scale*</li> </ul> <p>Self-reported levels of:</p> <ul style="list-style-type: none"> <li>- Levels of Physical Activity*</li> <li>- Number of Fruit and Vegetables Consumed*</li> <li>- sleep*</li> </ul> <p>Process of care measures in previous 12 months and over the 5 months of the intervention:</p> <ul style="list-style-type: none"> <li>- GP appointments*</li> <li>- prescription dispensed*</li> <li>- cost analysis pre-intervention and cost savings over the 5 months of intervention*</li> </ul> | <p>Peer-Review: no</p> <p>Funding source:<br/>Innovate to Save Pilot (I2S)</p> <p>Declaration of interest:<br/>not mentioned</p> |
| N                    |                                                                                                                                                                                                                                                                                                                               | 31                                                                                                                                                                                                                                                                                                                                                                                                                                                                                                                                                                                                                                                         |                                                    |                                                                                                                                                                                                                                                                                                                                                                                                                                                                                                                             |      |                            |              |                                                                                                                                                                                        |        |                                                                                                                                                                          |                                                                                                                                                                                                                                |                                                    |   |   |                    |   |   |                   |   |   |       |   |   |                        |                                                                                                                                                                                                                                                                                                                                                                                                                                                                                                                                                                                                                                                                                                                                                                                                                                                                                                                                                                                                                                                                                                                                                                |      |                                                 |     |                                                                                                                                                                                                                                                                                                                               |      |                                                                                                                                                                                       |              |                           |     |                                                                                                            |       |                        |                   |                                               |           |              |                                                                                                                                                                                                                                                                                                                                                                                                                                                                                                                                                                                                                                                                                                                                                                                       |                                                                                                                                  |
| Age                  | > 45 years %                                                                                                                                                                                                                                                                                                                  | 56,3                                                                                                                                                                                                                                                                                                                                                                                                                                                                                                                                                                                                                                                       |                                                    |                                                                                                                                                                                                                                                                                                                                                                                                                                                                                                                             |      |                            |              |                                                                                                                                                                                        |        |                                                                                                                                                                          |                                                                                                                                                                                                                                |                                                    |   |   |                    |   |   |                   |   |   |       |   |   |                        |                                                                                                                                                                                                                                                                                                                                                                                                                                                                                                                                                                                                                                                                                                                                                                                                                                                                                                                                                                                                                                                                                                                                                                |      |                                                 |     |                                                                                                                                                                                                                                                                                                                               |      |                                                                                                                                                                                       |              |                           |     |                                                                                                            |       |                        |                   |                                               |           |              |                                                                                                                                                                                                                                                                                                                                                                                                                                                                                                                                                                                                                                                                                                                                                                                       |                                                                                                                                  |
| Gender               | -                                                                                                                                                                                                                                                                                                                             | -                                                                                                                                                                                                                                                                                                                                                                                                                                                                                                                                                                                                                                                          |                                                    |                                                                                                                                                                                                                                                                                                                                                                                                                                                                                                                             |      |                            |              |                                                                                                                                                                                        |        |                                                                                                                                                                          |                                                                                                                                                                                                                                |                                                    |   |   |                    |   |   |                   |   |   |       |   |   |                        |                                                                                                                                                                                                                                                                                                                                                                                                                                                                                                                                                                                                                                                                                                                                                                                                                                                                                                                                                                                                                                                                                                                                                                |      |                                                 |     |                                                                                                                                                                                                                                                                                                                               |      |                                                                                                                                                                                       |              |                           |     |                                                                                                            |       |                        |                   |                                               |           |              |                                                                                                                                                                                                                                                                                                                                                                                                                                                                                                                                                                                                                                                                                                                                                                                       |                                                                                                                                  |
| Ethnicity            | -                                                                                                                                                                                                                                                                                                                             | -                                                                                                                                                                                                                                                                                                                                                                                                                                                                                                                                                                                                                                                          |                                                    |                                                                                                                                                                                                                                                                                                                                                                                                                                                                                                                             |      |                            |              |                                                                                                                                                                                        |        |                                                                                                                                                                          |                                                                                                                                                                                                                                |                                                    |   |   |                    |   |   |                   |   |   |       |   |   |                        |                                                                                                                                                                                                                                                                                                                                                                                                                                                                                                                                                                                                                                                                                                                                                                                                                                                                                                                                                                                                                                                                                                                                                                |      |                                                 |     |                                                                                                                                                                                                                                                                                                                               |      |                                                                                                                                                                                       |              |                           |     |                                                                                                            |       |                        |                   |                                               |           |              |                                                                                                                                                                                                                                                                                                                                                                                                                                                                                                                                                                                                                                                                                                                                                                                       |                                                                                                                                  |
| Living arrangement   | -                                                                                                                                                                                                                                                                                                                             | -                                                                                                                                                                                                                                                                                                                                                                                                                                                                                                                                                                                                                                                          |                                                    |                                                                                                                                                                                                                                                                                                                                                                                                                                                                                                                             |      |                            |              |                                                                                                                                                                                        |        |                                                                                                                                                                          |                                                                                                                                                                                                                                |                                                    |   |   |                    |   |   |                   |   |   |       |   |   |                        |                                                                                                                                                                                                                                                                                                                                                                                                                                                                                                                                                                                                                                                                                                                                                                                                                                                                                                                                                                                                                                                                                                                                                                |      |                                                 |     |                                                                                                                                                                                                                                                                                                                               |      |                                                                                                                                                                                       |              |                           |     |                                                                                                            |       |                        |                   |                                               |           |              |                                                                                                                                                                                                                                                                                                                                                                                                                                                                                                                                                                                                                                                                                                                                                                                       |                                                                                                                                  |
| Employment status    | -                                                                                                                                                                                                                                                                                                                             | -                                                                                                                                                                                                                                                                                                                                                                                                                                                                                                                                                                                                                                                          |                                                    |                                                                                                                                                                                                                                                                                                                                                                                                                                                                                                                             |      |                            |              |                                                                                                                                                                                        |        |                                                                                                                                                                          |                                                                                                                                                                                                                                |                                                    |   |   |                    |   |   |                   |   |   |       |   |   |                        |                                                                                                                                                                                                                                                                                                                                                                                                                                                                                                                                                                                                                                                                                                                                                                                                                                                                                                                                                                                                                                                                                                                                                                |      |                                                 |     |                                                                                                                                                                                                                                                                                                                               |      |                                                                                                                                                                                       |              |                           |     |                                                                                                            |       |                        |                   |                                               |           |              |                                                                                                                                                                                                                                                                                                                                                                                                                                                                                                                                                                                                                                                                                                                                                                                       |                                                                                                                                  |
| Other                | -                                                                                                                                                                                                                                                                                                                             | -                                                                                                                                                                                                                                                                                                                                                                                                                                                                                                                                                                                                                                                          |                                                    |                                                                                                                                                                                                                                                                                                                                                                                                                                                                                                                             |      |                            |              |                                                                                                                                                                                        |        |                                                                                                                                                                          |                                                                                                                                                                                                                                |                                                    |   |   |                    |   |   |                   |   |   |       |   |   |                        |                                                                                                                                                                                                                                                                                                                                                                                                                                                                                                                                                                                                                                                                                                                                                                                                                                                                                                                                                                                                                                                                                                                                                                |      |                                                 |     |                                                                                                                                                                                                                                                                                                                               |      |                                                                                                                                                                                       |              |                           |     |                                                                                                            |       |                        |                   |                                               |           |              |                                                                                                                                                                                                                                                                                                                                                                                                                                                                                                                                                                                                                                                                                                                                                                                       |                                                                                                                                  |
| Name                 | Grow Cardiff Gardening Social Prescribing pilot                                                                                                                                                                                                                                                                               |                                                                                                                                                                                                                                                                                                                                                                                                                                                                                                                                                                                                                                                            |                                                    |                                                                                                                                                                                                                                                                                                                                                                                                                                                                                                                             |      |                            |              |                                                                                                                                                                                        |        |                                                                                                                                                                          |                                                                                                                                                                                                                                |                                                    |   |   |                    |   |   |                   |   |   |       |   |   |                        |                                                                                                                                                                                                                                                                                                                                                                                                                                                                                                                                                                                                                                                                                                                                                                                                                                                                                                                                                                                                                                                                                                                                                                |      |                                                 |     |                                                                                                                                                                                                                                                                                                                               |      |                                                                                                                                                                                       |              |                           |     |                                                                                                            |       |                        |                   |                                               |           |              |                                                                                                                                                                                                                                                                                                                                                                                                                                                                                                                                                                                                                                                                                                                                                                                       |                                                                                                                                  |
| Why                  | Regular contact with nature can promote positive health behaviours and a regular contact with nature is a form of preventive medicine<br><br>- around 20% of patients consult their GP for psychosocial problems, it has been argued that psychosocial issues and long-term conditions can be better managed in the community |                                                                                                                                                                                                                                                                                                                                                                                                                                                                                                                                                                                                                                                            |                                                    |                                                                                                                                                                                                                                                                                                                                                                                                                                                                                                                             |      |                            |              |                                                                                                                                                                                        |        |                                                                                                                                                                          |                                                                                                                                                                                                                                |                                                    |   |   |                    |   |   |                   |   |   |       |   |   |                        |                                                                                                                                                                                                                                                                                                                                                                                                                                                                                                                                                                                                                                                                                                                                                                                                                                                                                                                                                                                                                                                                                                                                                                |      |                                                 |     |                                                                                                                                                                                                                                                                                                                               |      |                                                                                                                                                                                       |              |                           |     |                                                                                                            |       |                        |                   |                                               |           |              |                                                                                                                                                                                                                                                                                                                                                                                                                                                                                                                                                                                                                                                                                                                                                                                       |                                                                                                                                  |
| What                 | 6-months SP pilot in a local community garden or a garden attached to the surgery<br><br>- patients were supervised by a gardener and attended regular gardening sessions once a week                                                                                                                                         |                                                                                                                                                                                                                                                                                                                                                                                                                                                                                                                                                                                                                                                            |                                                    |                                                                                                                                                                                                                                                                                                                                                                                                                                                                                                                             |      |                            |              |                                                                                                                                                                                        |        |                                                                                                                                                                          |                                                                                                                                                                                                                                |                                                    |   |   |                    |   |   |                   |   |   |       |   |   |                        |                                                                                                                                                                                                                                                                                                                                                                                                                                                                                                                                                                                                                                                                                                                                                                                                                                                                                                                                                                                                                                                                                                                                                                |      |                                                 |     |                                                                                                                                                                                                                                                                                                                               |      |                                                                                                                                                                                       |              |                           |     |                                                                                                            |       |                        |                   |                                               |           |              |                                                                                                                                                                                                                                                                                                                                                                                                                                                                                                                                                                                                                                                                                                                                                                                       |                                                                                                                                  |
| Who provided         | Directly through gardener                                                                                                                                                                                                                                                                                                     |                                                                                                                                                                                                                                                                                                                                                                                                                                                                                                                                                                                                                                                            |                                                    |                                                                                                                                                                                                                                                                                                                                                                                                                                                                                                                             |      |                            |              |                                                                                                                                                                                        |        |                                                                                                                                                                          |                                                                                                                                                                                                                                |                                                    |   |   |                    |   |   |                   |   |   |       |   |   |                        |                                                                                                                                                                                                                                                                                                                                                                                                                                                                                                                                                                                                                                                                                                                                                                                                                                                                                                                                                                                                                                                                                                                                                                |      |                                                 |     |                                                                                                                                                                                                                                                                                                                               |      |                                                                                                                                                                                       |              |                           |     |                                                                                                            |       |                        |                   |                                               |           |              |                                                                                                                                                                                                                                                                                                                                                                                                                                                                                                                                                                                                                                                                                                                                                                                       |                                                                                                                                  |
| How                  | patients identified by GP's and practice staff in 3 surgeries in the SWC GP Cluster were referred directly                                                                                                                                                                                                                    |                                                                                                                                                                                                                                                                                                                                                                                                                                                                                                                                                                                                                                                            |                                                    |                                                                                                                                                                                                                                                                                                                                                                                                                                                                                                                             |      |                            |              |                                                                                                                                                                                        |        |                                                                                                                                                                          |                                                                                                                                                                                                                                |                                                    |   |   |                    |   |   |                   |   |   |       |   |   |                        |                                                                                                                                                                                                                                                                                                                                                                                                                                                                                                                                                                                                                                                                                                                                                                                                                                                                                                                                                                                                                                                                                                                                                                |      |                                                 |     |                                                                                                                                                                                                                                                                                                                               |      |                                                                                                                                                                                       |              |                           |     |                                                                                                            |       |                        |                   |                                               |           |              |                                                                                                                                                                                                                                                                                                                                                                                                                                                                                                                                                                                                                                                                                                                                                                                       |                                                                                                                                  |
| Where                | Local community garden                                                                                                                                                                                                                                                                                                        |                                                                                                                                                                                                                                                                                                                                                                                                                                                                                                                                                                                                                                                            |                                                    |                                                                                                                                                                                                                                                                                                                                                                                                                                                                                                                             |      |                            |              |                                                                                                                                                                                        |        |                                                                                                                                                                          |                                                                                                                                                                                                                                |                                                    |   |   |                    |   |   |                   |   |   |       |   |   |                        |                                                                                                                                                                                                                                                                                                                                                                                                                                                                                                                                                                                                                                                                                                                                                                                                                                                                                                                                                                                                                                                                                                                                                                |      |                                                 |     |                                                                                                                                                                                                                                                                                                                               |      |                                                                                                                                                                                       |              |                           |     |                                                                                                            |       |                        |                   |                                               |           |              |                                                                                                                                                                                                                                                                                                                                                                                                                                                                                                                                                                                                                                                                                                                                                                                       |                                                                                                                                  |
| When and How Much    | Once a week, delivered over a 5-months period                                                                                                                                                                                                                                                                                 |                                                                                                                                                                                                                                                                                                                                                                                                                                                                                                                                                                                                                                                            |                                                    |                                                                                                                                                                                                                                                                                                                                                                                                                                                                                                                             |      |                            |              |                                                                                                                                                                                        |        |                                                                                                                                                                          |                                                                                                                                                                                                                                |                                                    |   |   |                    |   |   |                   |   |   |       |   |   |                        |                                                                                                                                                                                                                                                                                                                                                                                                                                                                                                                                                                                                                                                                                                                                                                                                                                                                                                                                                                                                                                                                                                                                                                |      |                                                 |     |                                                                                                                                                                                                                                                                                                                               |      |                                                                                                                                                                                       |              |                           |     |                                                                                                            |       |                        |                   |                                               |           |              |                                                                                                                                                                                                                                                                                                                                                                                                                                                                                                                                                                                                                                                                                                                                                                                       |                                                                                                                                  |
| Tailoring            | Personalized                                                                                                                                                                                                                                                                                                                  |                                                                                                                                                                                                                                                                                                                                                                                                                                                                                                                                                                                                                                                            |                                                    |                                                                                                                                                                                                                                                                                                                                                                                                                                                                                                                             |      |                            |              |                                                                                                                                                                                        |        |                                                                                                                                                                          |                                                                                                                                                                                                                                |                                                    |   |   |                    |   |   |                   |   |   |       |   |   |                        |                                                                                                                                                                                                                                                                                                                                                                                                                                                                                                                                                                                                                                                                                                                                                                                                                                                                                                                                                                                                                                                                                                                                                                |      |                                                 |     |                                                                                                                                                                                                                                                                                                                               |      |                                                                                                                                                                                       |              |                           |     |                                                                                                            |       |                        |                   |                                               |           |              |                                                                                                                                                                                                                                                                                                                                                                                                                                                                                                                                                                                                                                                                                                                                                                                       |                                                                                                                                  |
| Kellezi 2019 (71,72) | Uncontrolled before-and-after study, mixed-methods                                                                                                                                                                                                                                                                            | <p><b>Inclusion criteria:</b><br/>Over 18 years, live in the relevant area in Nottingham (or are registered with a GP in the area), are managing one or more long-term health conditions and feel isolated, lonely or anxious (from protocol)</p> <p><b>Exclusion criteria:</b> -</p>                                                                                                                                                                                                                                                                                                                                                                      | Primary Care<br><br>Country:<br>UK (East Midlands) | <table border="1"> <tr> <td>Name</td> <td>Social prescribing pathway</td> </tr> <tr> <td>Why</td> <td>Reduce the economic burden of loneliness, increase patients' illness self-management, address their psychosocial and health needs, and through this to reduce primary healthcare usage</td> </tr> <tr> <td>What</td> <td>Referred by GPs during consultations, by third-sector organisations operating within Nottingham and by self-referral after seeing promotional materials in GP surgeries,</td> </tr> </table> | Name | Social prescribing pathway | Why          | Reduce the economic burden of loneliness, increase patients' illness self-management, address their psychosocial and health needs, and through this to reduce primary healthcare usage | What   | Referred by GPs during consultations, by third-sector organisations operating within Nottingham and by self-referral after seeing promotional materials in GP surgeries, | <p>Patient outcomes at baseline, 4 and 6 months endpoint:</p> <ul style="list-style-type: none"> <li>- EQ-5D</li> <li>- UCLA Loneliness Scale</li> <li>- Community belonging</li> <li>- Number of group memberships</li> </ul> | <p>Peer-Review:<br/>Yes</p> <p>Funding source:</p> |   |   |                    |   |   |                   |   |   |       |   |   |                        |                                                                                                                                                                                                                                                                                                                                                                                                                                                                                                                                                                                                                                                                                                                                                                                                                                                                                                                                                                                                                                                                                                                                                                |      |                                                 |     |                                                                                                                                                                                                                                                                                                                               |      |                                                                                                                                                                                       |              |                           |     |                                                                                                            |       |                        |                   |                                               |           |              |                                                                                                                                                                                                                                                                                                                                                                                                                                                                                                                                                                                                                                                                                                                                                                                       |                                                                                                                                  |
| Name                 | Social prescribing pathway                                                                                                                                                                                                                                                                                                    |                                                                                                                                                                                                                                                                                                                                                                                                                                                                                                                                                                                                                                                            |                                                    |                                                                                                                                                                                                                                                                                                                                                                                                                                                                                                                             |      |                            |              |                                                                                                                                                                                        |        |                                                                                                                                                                          |                                                                                                                                                                                                                                |                                                    |   |   |                    |   |   |                   |   |   |       |   |   |                        |                                                                                                                                                                                                                                                                                                                                                                                                                                                                                                                                                                                                                                                                                                                                                                                                                                                                                                                                                                                                                                                                                                                                                                |      |                                                 |     |                                                                                                                                                                                                                                                                                                                               |      |                                                                                                                                                                                       |              |                           |     |                                                                                                            |       |                        |                   |                                               |           |              |                                                                                                                                                                                                                                                                                                                                                                                                                                                                                                                                                                                                                                                                                                                                                                                       |                                                                                                                                  |
| Why                  | Reduce the economic burden of loneliness, increase patients' illness self-management, address their psychosocial and health needs, and through this to reduce primary healthcare usage                                                                                                                                        |                                                                                                                                                                                                                                                                                                                                                                                                                                                                                                                                                                                                                                                            |                                                    |                                                                                                                                                                                                                                                                                                                                                                                                                                                                                                                             |      |                            |              |                                                                                                                                                                                        |        |                                                                                                                                                                          |                                                                                                                                                                                                                                |                                                    |   |   |                    |   |   |                   |   |   |       |   |   |                        |                                                                                                                                                                                                                                                                                                                                                                                                                                                                                                                                                                                                                                                                                                                                                                                                                                                                                                                                                                                                                                                                                                                                                                |      |                                                 |     |                                                                                                                                                                                                                                                                                                                               |      |                                                                                                                                                                                       |              |                           |     |                                                                                                            |       |                        |                   |                                               |           |              |                                                                                                                                                                                                                                                                                                                                                                                                                                                                                                                                                                                                                                                                                                                                                                                       |                                                                                                                                  |
| What                 | Referred by GPs during consultations, by third-sector organisations operating within Nottingham and by self-referral after seeing promotional materials in GP surgeries,                                                                                                                                                      |                                                                                                                                                                                                                                                                                                                                                                                                                                                                                                                                                                                                                                                            |                                                    |                                                                                                                                                                                                                                                                                                                                                                                                                                                                                                                             |      |                            |              |                                                                                                                                                                                        |        |                                                                                                                                                                          |                                                                                                                                                                                                                                |                                                    |   |   |                    |   |   |                   |   |   |       |   |   |                        |                                                                                                                                                                                                                                                                                                                                                                                                                                                                                                                                                                                                                                                                                                                                                                                                                                                                                                                                                                                                                                                                                                                                                                |      |                                                 |     |                                                                                                                                                                                                                                                                                                                               |      |                                                                                                                                                                                       |              |                           |     |                                                                                                            |       |                        |                   |                                               |           |              |                                                                                                                                                                                                                                                                                                                                                                                                                                                                                                                                                                                                                                                                                                                                                                                       |                                                                                                                                  |



|                                                          |                                                                                                                                                                                                                                                                                                                                                                                                                                                                                                                                |                                                                                                                                                                                                                                                                                                                                                                                                                                                                                                                                                                                                                                                                                                                                                                                                                                                                                                                                                                                                  |   |  |     |     |           |               |        |          |    |           |   |   |                    |   |   |                   |   |   |       |                |           |                                                                                                           |                                                                                                                                                                                                                                                                                                                                                                                                                                                                                                                                                                                                                                                                                                                                                                                                                                                                                                                                                                                                                                                                                                                                                                                                                                                                                                                                                                                                                              |              |                                           |     |                                                                                                                                                                                                                                                                                              |       |                                                                                                                                                                                                                                                                                                                                                                                                                                                                                                                                |                   |                                                                                                                                                                                                                                                                                               |           |              |                                                                                                                                                                                                                                                 |                                                                                                                                                                               |                   |                                                       |           |              |                                                                                                                                                                                                                                                                                                                                                                                                                                                                                                                                    |                                                                                                                                                                                             |
|----------------------------------------------------------|--------------------------------------------------------------------------------------------------------------------------------------------------------------------------------------------------------------------------------------------------------------------------------------------------------------------------------------------------------------------------------------------------------------------------------------------------------------------------------------------------------------------------------|--------------------------------------------------------------------------------------------------------------------------------------------------------------------------------------------------------------------------------------------------------------------------------------------------------------------------------------------------------------------------------------------------------------------------------------------------------------------------------------------------------------------------------------------------------------------------------------------------------------------------------------------------------------------------------------------------------------------------------------------------------------------------------------------------------------------------------------------------------------------------------------------------------------------------------------------------------------------------------------------------|---|--|-----|-----|-----------|---------------|--------|----------|----|-----------|---|---|--------------------|---|---|-------------------|---|---|-------|----------------|-----------|-----------------------------------------------------------------------------------------------------------|------------------------------------------------------------------------------------------------------------------------------------------------------------------------------------------------------------------------------------------------------------------------------------------------------------------------------------------------------------------------------------------------------------------------------------------------------------------------------------------------------------------------------------------------------------------------------------------------------------------------------------------------------------------------------------------------------------------------------------------------------------------------------------------------------------------------------------------------------------------------------------------------------------------------------------------------------------------------------------------------------------------------------------------------------------------------------------------------------------------------------------------------------------------------------------------------------------------------------------------------------------------------------------------------------------------------------------------------------------------------------------------------------------------------------|--------------|-------------------------------------------|-----|----------------------------------------------------------------------------------------------------------------------------------------------------------------------------------------------------------------------------------------------------------------------------------------------|-------|--------------------------------------------------------------------------------------------------------------------------------------------------------------------------------------------------------------------------------------------------------------------------------------------------------------------------------------------------------------------------------------------------------------------------------------------------------------------------------------------------------------------------------|-------------------|-----------------------------------------------------------------------------------------------------------------------------------------------------------------------------------------------------------------------------------------------------------------------------------------------|-----------|--------------|-------------------------------------------------------------------------------------------------------------------------------------------------------------------------------------------------------------------------------------------------|-------------------------------------------------------------------------------------------------------------------------------------------------------------------------------|-------------------|-------------------------------------------------------|-----------|--------------|------------------------------------------------------------------------------------------------------------------------------------------------------------------------------------------------------------------------------------------------------------------------------------------------------------------------------------------------------------------------------------------------------------------------------------------------------------------------------------------------------------------------------------|---------------------------------------------------------------------------------------------------------------------------------------------------------------------------------------------|
|                                                          | <p>Study length:<br/>16 months</p>                                                                                                                                                                                                                                                                                                                                                                                                                                                                                             | <p>Baseline characteristics:</p> <table border="1" data-bbox="477 222 845 646"> <tr> <td>N</td> <td></td> <td>630</td> </tr> <tr> <td>Age</td> <td>Mean (SD)</td> <td>52.74 (14.79)</td> </tr> <tr> <td>Gender</td> <td>Female %</td> <td>54</td> </tr> <tr> <td>Ethnicity</td> <td>-</td> <td>-</td> </tr> <tr> <td>Living arrangement</td> <td>-</td> <td>-</td> </tr> <tr> <td>Employment status</td> <td>-</td> <td>-</td> </tr> <tr> <td>Other</td> <td>Relationship %</td> <td>59.2</td> </tr> </table> <p>Population: General</p>                                                                                                                                                                                                                                                                                                                                                                                                                                                         | N |  | 630 | Age | Mean (SD) | 52.74 (14.79) | Gender | Female % | 54 | Ethnicity | - | - | Living arrangement | - | - | Employment status | - | - | Other | Relationship % | 59.2      |                                                                                                           | <p>libraries and community centres. Once recruited onto the pathway, patients have an initial meeting and needs assessment with an HC, who either prescribes self-care management or refers to an LW, who in turn connects the patient with relevant third-sector groups. HC/LWs regularly check on patients' progress.</p> <table border="1" data-bbox="1308 300 2228 604"> <tr> <td>Who provided</td> <td>Health coaches (HC) and link workers (LW)</td> </tr> <tr> <td>How</td> <td>Face-to-face</td> </tr> <tr> <td>Where</td> <td>GP surgeries</td> </tr> <tr> <td>When and How Much</td> <td>The aim of the pathway was to support each patient weekly for up to 8 weeks. The length of support depended on the specific paths offered. The initial appointment lasted over 1 hour, and further appointments ranged in length based on the activities in which the patients were involved.</td> </tr> <tr> <td>Tailoring</td> <td>Personalized</td> </tr> </table> <p>Intervention: Holistic</p>                                                                                                                                                                                                                                                                                                                                                                                                                       | Who provided | Health coaches (HC) and link workers (LW) | How | Face-to-face                                                                                                                                                                                                                                                                                 | Where | GP surgeries                                                                                                                                                                                                                                                                                                                                                                                                                                                                                                                   | When and How Much | The aim of the pathway was to support each patient weekly for up to 8 weeks. The length of support depended on the specific paths offered. The initial appointment lasted over 1 hour, and further appointments ranged in length based on the activities in which the patients were involved. | Tailoring | Personalized | <ul style="list-style-type: none"> <li>- Social support</li> </ul> <p>Process of care measures at baseline and 4 months endpoint:</p> <ul style="list-style-type: none"> <li>- Primary care use</li> <li>- Primary care services use</li> </ul> | <p>ImROC (Implementing Recovery Through Organisational Change). The study was sponsored by Nottingham Trent University</p> <p>Declarations of interest:<br/>None declared</p> |                   |                                                       |           |              |                                                                                                                                                                                                                                                                                                                                                                                                                                                                                                                                    |                                                                                                                                                                                             |
| N                                                        |                                                                                                                                                                                                                                                                                                                                                                                                                                                                                                                                | 630                                                                                                                                                                                                                                                                                                                                                                                                                                                                                                                                                                                                                                                                                                                                                                                                                                                                                                                                                                                              |   |  |     |     |           |               |        |          |    |           |   |   |                    |   |   |                   |   |   |       |                |           |                                                                                                           |                                                                                                                                                                                                                                                                                                                                                                                                                                                                                                                                                                                                                                                                                                                                                                                                                                                                                                                                                                                                                                                                                                                                                                                                                                                                                                                                                                                                                              |              |                                           |     |                                                                                                                                                                                                                                                                                              |       |                                                                                                                                                                                                                                                                                                                                                                                                                                                                                                                                |                   |                                                                                                                                                                                                                                                                                               |           |              |                                                                                                                                                                                                                                                 |                                                                                                                                                                               |                   |                                                       |           |              |                                                                                                                                                                                                                                                                                                                                                                                                                                                                                                                                    |                                                                                                                                                                                             |
| Age                                                      | Mean (SD)                                                                                                                                                                                                                                                                                                                                                                                                                                                                                                                      | 52.74 (14.79)                                                                                                                                                                                                                                                                                                                                                                                                                                                                                                                                                                                                                                                                                                                                                                                                                                                                                                                                                                                    |   |  |     |     |           |               |        |          |    |           |   |   |                    |   |   |                   |   |   |       |                |           |                                                                                                           |                                                                                                                                                                                                                                                                                                                                                                                                                                                                                                                                                                                                                                                                                                                                                                                                                                                                                                                                                                                                                                                                                                                                                                                                                                                                                                                                                                                                                              |              |                                           |     |                                                                                                                                                                                                                                                                                              |       |                                                                                                                                                                                                                                                                                                                                                                                                                                                                                                                                |                   |                                                                                                                                                                                                                                                                                               |           |              |                                                                                                                                                                                                                                                 |                                                                                                                                                                               |                   |                                                       |           |              |                                                                                                                                                                                                                                                                                                                                                                                                                                                                                                                                    |                                                                                                                                                                                             |
| Gender                                                   | Female %                                                                                                                                                                                                                                                                                                                                                                                                                                                                                                                       | 54                                                                                                                                                                                                                                                                                                                                                                                                                                                                                                                                                                                                                                                                                                                                                                                                                                                                                                                                                                                               |   |  |     |     |           |               |        |          |    |           |   |   |                    |   |   |                   |   |   |       |                |           |                                                                                                           |                                                                                                                                                                                                                                                                                                                                                                                                                                                                                                                                                                                                                                                                                                                                                                                                                                                                                                                                                                                                                                                                                                                                                                                                                                                                                                                                                                                                                              |              |                                           |     |                                                                                                                                                                                                                                                                                              |       |                                                                                                                                                                                                                                                                                                                                                                                                                                                                                                                                |                   |                                                                                                                                                                                                                                                                                               |           |              |                                                                                                                                                                                                                                                 |                                                                                                                                                                               |                   |                                                       |           |              |                                                                                                                                                                                                                                                                                                                                                                                                                                                                                                                                    |                                                                                                                                                                                             |
| Ethnicity                                                | -                                                                                                                                                                                                                                                                                                                                                                                                                                                                                                                              | -                                                                                                                                                                                                                                                                                                                                                                                                                                                                                                                                                                                                                                                                                                                                                                                                                                                                                                                                                                                                |   |  |     |     |           |               |        |          |    |           |   |   |                    |   |   |                   |   |   |       |                |           |                                                                                                           |                                                                                                                                                                                                                                                                                                                                                                                                                                                                                                                                                                                                                                                                                                                                                                                                                                                                                                                                                                                                                                                                                                                                                                                                                                                                                                                                                                                                                              |              |                                           |     |                                                                                                                                                                                                                                                                                              |       |                                                                                                                                                                                                                                                                                                                                                                                                                                                                                                                                |                   |                                                                                                                                                                                                                                                                                               |           |              |                                                                                                                                                                                                                                                 |                                                                                                                                                                               |                   |                                                       |           |              |                                                                                                                                                                                                                                                                                                                                                                                                                                                                                                                                    |                                                                                                                                                                                             |
| Living arrangement                                       | -                                                                                                                                                                                                                                                                                                                                                                                                                                                                                                                              | -                                                                                                                                                                                                                                                                                                                                                                                                                                                                                                                                                                                                                                                                                                                                                                                                                                                                                                                                                                                                |   |  |     |     |           |               |        |          |    |           |   |   |                    |   |   |                   |   |   |       |                |           |                                                                                                           |                                                                                                                                                                                                                                                                                                                                                                                                                                                                                                                                                                                                                                                                                                                                                                                                                                                                                                                                                                                                                                                                                                                                                                                                                                                                                                                                                                                                                              |              |                                           |     |                                                                                                                                                                                                                                                                                              |       |                                                                                                                                                                                                                                                                                                                                                                                                                                                                                                                                |                   |                                                                                                                                                                                                                                                                                               |           |              |                                                                                                                                                                                                                                                 |                                                                                                                                                                               |                   |                                                       |           |              |                                                                                                                                                                                                                                                                                                                                                                                                                                                                                                                                    |                                                                                                                                                                                             |
| Employment status                                        | -                                                                                                                                                                                                                                                                                                                                                                                                                                                                                                                              | -                                                                                                                                                                                                                                                                                                                                                                                                                                                                                                                                                                                                                                                                                                                                                                                                                                                                                                                                                                                                |   |  |     |     |           |               |        |          |    |           |   |   |                    |   |   |                   |   |   |       |                |           |                                                                                                           |                                                                                                                                                                                                                                                                                                                                                                                                                                                                                                                                                                                                                                                                                                                                                                                                                                                                                                                                                                                                                                                                                                                                                                                                                                                                                                                                                                                                                              |              |                                           |     |                                                                                                                                                                                                                                                                                              |       |                                                                                                                                                                                                                                                                                                                                                                                                                                                                                                                                |                   |                                                                                                                                                                                                                                                                                               |           |              |                                                                                                                                                                                                                                                 |                                                                                                                                                                               |                   |                                                       |           |              |                                                                                                                                                                                                                                                                                                                                                                                                                                                                                                                                    |                                                                                                                                                                                             |
| Other                                                    | Relationship %                                                                                                                                                                                                                                                                                                                                                                                                                                                                                                                 | 59.2                                                                                                                                                                                                                                                                                                                                                                                                                                                                                                                                                                                                                                                                                                                                                                                                                                                                                                                                                                                             |   |  |     |     |           |               |        |          |    |           |   |   |                    |   |   |                   |   |   |       |                |           |                                                                                                           |                                                                                                                                                                                                                                                                                                                                                                                                                                                                                                                                                                                                                                                                                                                                                                                                                                                                                                                                                                                                                                                                                                                                                                                                                                                                                                                                                                                                                              |              |                                           |     |                                                                                                                                                                                                                                                                                              |       |                                                                                                                                                                                                                                                                                                                                                                                                                                                                                                                                |                   |                                                                                                                                                                                                                                                                                               |           |              |                                                                                                                                                                                                                                                 |                                                                                                                                                                               |                   |                                                       |           |              |                                                                                                                                                                                                                                                                                                                                                                                                                                                                                                                                    |                                                                                                                                                                                             |
| Who provided                                             | Health coaches (HC) and link workers (LW)                                                                                                                                                                                                                                                                                                                                                                                                                                                                                      |                                                                                                                                                                                                                                                                                                                                                                                                                                                                                                                                                                                                                                                                                                                                                                                                                                                                                                                                                                                                  |   |  |     |     |           |               |        |          |    |           |   |   |                    |   |   |                   |   |   |       |                |           |                                                                                                           |                                                                                                                                                                                                                                                                                                                                                                                                                                                                                                                                                                                                                                                                                                                                                                                                                                                                                                                                                                                                                                                                                                                                                                                                                                                                                                                                                                                                                              |              |                                           |     |                                                                                                                                                                                                                                                                                              |       |                                                                                                                                                                                                                                                                                                                                                                                                                                                                                                                                |                   |                                                                                                                                                                                                                                                                                               |           |              |                                                                                                                                                                                                                                                 |                                                                                                                                                                               |                   |                                                       |           |              |                                                                                                                                                                                                                                                                                                                                                                                                                                                                                                                                    |                                                                                                                                                                                             |
| How                                                      | Face-to-face                                                                                                                                                                                                                                                                                                                                                                                                                                                                                                                   |                                                                                                                                                                                                                                                                                                                                                                                                                                                                                                                                                                                                                                                                                                                                                                                                                                                                                                                                                                                                  |   |  |     |     |           |               |        |          |    |           |   |   |                    |   |   |                   |   |   |       |                |           |                                                                                                           |                                                                                                                                                                                                                                                                                                                                                                                                                                                                                                                                                                                                                                                                                                                                                                                                                                                                                                                                                                                                                                                                                                                                                                                                                                                                                                                                                                                                                              |              |                                           |     |                                                                                                                                                                                                                                                                                              |       |                                                                                                                                                                                                                                                                                                                                                                                                                                                                                                                                |                   |                                                                                                                                                                                                                                                                                               |           |              |                                                                                                                                                                                                                                                 |                                                                                                                                                                               |                   |                                                       |           |              |                                                                                                                                                                                                                                                                                                                                                                                                                                                                                                                                    |                                                                                                                                                                                             |
| Where                                                    | GP surgeries                                                                                                                                                                                                                                                                                                                                                                                                                                                                                                                   |                                                                                                                                                                                                                                                                                                                                                                                                                                                                                                                                                                                                                                                                                                                                                                                                                                                                                                                                                                                                  |   |  |     |     |           |               |        |          |    |           |   |   |                    |   |   |                   |   |   |       |                |           |                                                                                                           |                                                                                                                                                                                                                                                                                                                                                                                                                                                                                                                                                                                                                                                                                                                                                                                                                                                                                                                                                                                                                                                                                                                                                                                                                                                                                                                                                                                                                              |              |                                           |     |                                                                                                                                                                                                                                                                                              |       |                                                                                                                                                                                                                                                                                                                                                                                                                                                                                                                                |                   |                                                                                                                                                                                                                                                                                               |           |              |                                                                                                                                                                                                                                                 |                                                                                                                                                                               |                   |                                                       |           |              |                                                                                                                                                                                                                                                                                                                                                                                                                                                                                                                                    |                                                                                                                                                                                             |
| When and How Much                                        | The aim of the pathway was to support each patient weekly for up to 8 weeks. The length of support depended on the specific paths offered. The initial appointment lasted over 1 hour, and further appointments ranged in length based on the activities in which the patients were involved.                                                                                                                                                                                                                                  |                                                                                                                                                                                                                                                                                                                                                                                                                                                                                                                                                                                                                                                                                                                                                                                                                                                                                                                                                                                                  |   |  |     |     |           |               |        |          |    |           |   |   |                    |   |   |                   |   |   |       |                |           |                                                                                                           |                                                                                                                                                                                                                                                                                                                                                                                                                                                                                                                                                                                                                                                                                                                                                                                                                                                                                                                                                                                                                                                                                                                                                                                                                                                                                                                                                                                                                              |              |                                           |     |                                                                                                                                                                                                                                                                                              |       |                                                                                                                                                                                                                                                                                                                                                                                                                                                                                                                                |                   |                                                                                                                                                                                                                                                                                               |           |              |                                                                                                                                                                                                                                                 |                                                                                                                                                                               |                   |                                                       |           |              |                                                                                                                                                                                                                                                                                                                                                                                                                                                                                                                                    |                                                                                                                                                                                             |
| Tailoring                                                | Personalized                                                                                                                                                                                                                                                                                                                                                                                                                                                                                                                   |                                                                                                                                                                                                                                                                                                                                                                                                                                                                                                                                                                                                                                                                                                                                                                                                                                                                                                                                                                                                  |   |  |     |     |           |               |        |          |    |           |   |   |                    |   |   |                   |   |   |       |                |           |                                                                                                           |                                                                                                                                                                                                                                                                                                                                                                                                                                                                                                                                                                                                                                                                                                                                                                                                                                                                                                                                                                                                                                                                                                                                                                                                                                                                                                                                                                                                                              |              |                                           |     |                                                                                                                                                                                                                                                                                              |       |                                                                                                                                                                                                                                                                                                                                                                                                                                                                                                                                |                   |                                                                                                                                                                                                                                                                                               |           |              |                                                                                                                                                                                                                                                 |                                                                                                                                                                               |                   |                                                       |           |              |                                                                                                                                                                                                                                                                                                                                                                                                                                                                                                                                    |                                                                                                                                                                                             |
| <p>Kensington &amp; Chelsea Social Council 2018 (73)</p> | <p>Uncontrolled before-and-after study, mixed-methods</p> <p>Study length:<br/>11 months</p>                                                                                                                                                                                                                                                                                                                                                                                                                                   | <p><b>Inclusion criteria:</b></p> <p>Tier 0:+65 years of age and are mostly healthy.</p> <p>Tier 1:+65 years of age and have one well-managed Long-Term Condition (LTC).</p> <p>Tier 2:+65 years of age and have two LTCs, mental health or social care needs.</p> <p>Tier 3:+65 years of age and have three or more LTCs, mental health or social care needs</p> <p>In the beginning Tier 2+3, expanded to Tier 1</p> <p><b>Exclusion criteria:</b> -</p> <p>Baseline characteristics:</p> <table border="1" data-bbox="477 1167 982 1503"> <tr> <td>N</td> <td></td> <td>807</td> </tr> <tr> <td>Age</td> <td>-</td> <td>-</td> </tr> <tr> <td>Gender</td> <td>-</td> <td>-</td> </tr> <tr> <td>Ethnicity</td> <td>-</td> <td>-</td> </tr> <tr> <td>Living arrangement</td> <td>-</td> <td>-</td> </tr> <tr> <td>Employment status</td> <td>-</td> <td>-</td> </tr> <tr> <td>Other</td> <td>Tier 2/3 %</td> <td>52.8/34.6</td> </tr> </table> <p>Population: Special (Geriatric age group)</p> | N |  | 807 | Age | -         | -             | Gender | -        | -  | Ethnicity | - | - | Living arrangement | - | - | Employment status | - | - | Other | Tier 2/3 %     | 52.8/34.6 | <p>Primary Care</p> <p>Country:<br/>UK (Royal Borough of Kensington and Chelsea, West Central London)</p> | <table border="1" data-bbox="1308 772 2228 1476"> <tr> <td>Name</td> <td>Self-Care Social Prescribing</td> </tr> <tr> <td>Why</td> <td>Increase patient confidence in making informed decisions about their health. It is expected to positively contribute to patients' confidence and motivation, which in turn is expected to contribute towards a long-term reduction in use of primary, secondary, and some tertiary services.</td> </tr> <tr> <td>What</td> <td>Social prescribing model links patients in primary care with sources of health and wellbeing support from specialist voluntary and community services,<br/><br/>Step 1: Patient is allocated to a practice-based Health and Social Care Assistant (HSCA) or Case Manager (CM),<br/><br/>Step 2: Patient assessment, completion of referral form with patient's requirements and notes on their situation - Direct referral to an appropriate service from the Self-Care directory of services,<br/><br/>Step 3: Referral completion.</td> </tr> <tr> <td>Who provided</td> <td>Practice-based Health and Social Care Assistant (HSCA) or Case Manager (CM)</td> </tr> <tr> <td>How</td> <td>-</td> </tr> <tr> <td>Where</td> <td>GP surgeries</td> </tr> <tr> <td>When and How Much</td> <td>Six service sessions after initial patient assessment</td> </tr> <tr> <td>Tailoring</td> <td>Personalized</td> </tr> </table> <p>Intervention: Medium</p> | Name         | Self-Care Social Prescribing              | Why | Increase patient confidence in making informed decisions about their health. It is expected to positively contribute to patients' confidence and motivation, which in turn is expected to contribute towards a long-term reduction in use of primary, secondary, and some tertiary services. | What  | Social prescribing model links patients in primary care with sources of health and wellbeing support from specialist voluntary and community services,<br><br>Step 1: Patient is allocated to a practice-based Health and Social Care Assistant (HSCA) or Case Manager (CM),<br><br>Step 2: Patient assessment, completion of referral form with patient's requirements and notes on their situation - Direct referral to an appropriate service from the Self-Care directory of services,<br><br>Step 3: Referral completion. | Who provided      | Practice-based Health and Social Care Assistant (HSCA) or Case Manager (CM)                                                                                                                                                                                                                   | How       | -            | Where                                                                                                                                                                                                                                           | GP surgeries                                                                                                                                                                  | When and How Much | Six service sessions after initial patient assessment | Tailoring | Personalized | <p>Patient outcomes at baseline and unclear endpoint:</p> <ul style="list-style-type: none"> <li>- EQ-5D</li> <li>- Warwick Edinburgh Mental Wellbeing Scale</li> <li>- Patient Health Questionnaire (PHQ-9)</li> <li>- Investigating Choice Experiments for the Preferences of Older People Capability Measure for Adults</li> <li>- The Short Form (12) Health Survey</li> </ul> <p>Process of care measures:</p> <ul style="list-style-type: none"> <li>- Economic evaluation</li> <li>- Social Return on Investment</li> </ul> | <p>Peer-Review:<br/>No</p> <p>Funding source:<br/>Kensington &amp; Chelsea Social Council and NHS West London Clinical Commissioning Group</p> <p>Declarations of interest:<br/>Unknown</p> |
| N                                                        |                                                                                                                                                                                                                                                                                                                                                                                                                                                                                                                                | 807                                                                                                                                                                                                                                                                                                                                                                                                                                                                                                                                                                                                                                                                                                                                                                                                                                                                                                                                                                                              |   |  |     |     |           |               |        |          |    |           |   |   |                    |   |   |                   |   |   |       |                |           |                                                                                                           |                                                                                                                                                                                                                                                                                                                                                                                                                                                                                                                                                                                                                                                                                                                                                                                                                                                                                                                                                                                                                                                                                                                                                                                                                                                                                                                                                                                                                              |              |                                           |     |                                                                                                                                                                                                                                                                                              |       |                                                                                                                                                                                                                                                                                                                                                                                                                                                                                                                                |                   |                                                                                                                                                                                                                                                                                               |           |              |                                                                                                                                                                                                                                                 |                                                                                                                                                                               |                   |                                                       |           |              |                                                                                                                                                                                                                                                                                                                                                                                                                                                                                                                                    |                                                                                                                                                                                             |
| Age                                                      | -                                                                                                                                                                                                                                                                                                                                                                                                                                                                                                                              | -                                                                                                                                                                                                                                                                                                                                                                                                                                                                                                                                                                                                                                                                                                                                                                                                                                                                                                                                                                                                |   |  |     |     |           |               |        |          |    |           |   |   |                    |   |   |                   |   |   |       |                |           |                                                                                                           |                                                                                                                                                                                                                                                                                                                                                                                                                                                                                                                                                                                                                                                                                                                                                                                                                                                                                                                                                                                                                                                                                                                                                                                                                                                                                                                                                                                                                              |              |                                           |     |                                                                                                                                                                                                                                                                                              |       |                                                                                                                                                                                                                                                                                                                                                                                                                                                                                                                                |                   |                                                                                                                                                                                                                                                                                               |           |              |                                                                                                                                                                                                                                                 |                                                                                                                                                                               |                   |                                                       |           |              |                                                                                                                                                                                                                                                                                                                                                                                                                                                                                                                                    |                                                                                                                                                                                             |
| Gender                                                   | -                                                                                                                                                                                                                                                                                                                                                                                                                                                                                                                              | -                                                                                                                                                                                                                                                                                                                                                                                                                                                                                                                                                                                                                                                                                                                                                                                                                                                                                                                                                                                                |   |  |     |     |           |               |        |          |    |           |   |   |                    |   |   |                   |   |   |       |                |           |                                                                                                           |                                                                                                                                                                                                                                                                                                                                                                                                                                                                                                                                                                                                                                                                                                                                                                                                                                                                                                                                                                                                                                                                                                                                                                                                                                                                                                                                                                                                                              |              |                                           |     |                                                                                                                                                                                                                                                                                              |       |                                                                                                                                                                                                                                                                                                                                                                                                                                                                                                                                |                   |                                                                                                                                                                                                                                                                                               |           |              |                                                                                                                                                                                                                                                 |                                                                                                                                                                               |                   |                                                       |           |              |                                                                                                                                                                                                                                                                                                                                                                                                                                                                                                                                    |                                                                                                                                                                                             |
| Ethnicity                                                | -                                                                                                                                                                                                                                                                                                                                                                                                                                                                                                                              | -                                                                                                                                                                                                                                                                                                                                                                                                                                                                                                                                                                                                                                                                                                                                                                                                                                                                                                                                                                                                |   |  |     |     |           |               |        |          |    |           |   |   |                    |   |   |                   |   |   |       |                |           |                                                                                                           |                                                                                                                                                                                                                                                                                                                                                                                                                                                                                                                                                                                                                                                                                                                                                                                                                                                                                                                                                                                                                                                                                                                                                                                                                                                                                                                                                                                                                              |              |                                           |     |                                                                                                                                                                                                                                                                                              |       |                                                                                                                                                                                                                                                                                                                                                                                                                                                                                                                                |                   |                                                                                                                                                                                                                                                                                               |           |              |                                                                                                                                                                                                                                                 |                                                                                                                                                                               |                   |                                                       |           |              |                                                                                                                                                                                                                                                                                                                                                                                                                                                                                                                                    |                                                                                                                                                                                             |
| Living arrangement                                       | -                                                                                                                                                                                                                                                                                                                                                                                                                                                                                                                              | -                                                                                                                                                                                                                                                                                                                                                                                                                                                                                                                                                                                                                                                                                                                                                                                                                                                                                                                                                                                                |   |  |     |     |           |               |        |          |    |           |   |   |                    |   |   |                   |   |   |       |                |           |                                                                                                           |                                                                                                                                                                                                                                                                                                                                                                                                                                                                                                                                                                                                                                                                                                                                                                                                                                                                                                                                                                                                                                                                                                                                                                                                                                                                                                                                                                                                                              |              |                                           |     |                                                                                                                                                                                                                                                                                              |       |                                                                                                                                                                                                                                                                                                                                                                                                                                                                                                                                |                   |                                                                                                                                                                                                                                                                                               |           |              |                                                                                                                                                                                                                                                 |                                                                                                                                                                               |                   |                                                       |           |              |                                                                                                                                                                                                                                                                                                                                                                                                                                                                                                                                    |                                                                                                                                                                                             |
| Employment status                                        | -                                                                                                                                                                                                                                                                                                                                                                                                                                                                                                                              | -                                                                                                                                                                                                                                                                                                                                                                                                                                                                                                                                                                                                                                                                                                                                                                                                                                                                                                                                                                                                |   |  |     |     |           |               |        |          |    |           |   |   |                    |   |   |                   |   |   |       |                |           |                                                                                                           |                                                                                                                                                                                                                                                                                                                                                                                                                                                                                                                                                                                                                                                                                                                                                                                                                                                                                                                                                                                                                                                                                                                                                                                                                                                                                                                                                                                                                              |              |                                           |     |                                                                                                                                                                                                                                                                                              |       |                                                                                                                                                                                                                                                                                                                                                                                                                                                                                                                                |                   |                                                                                                                                                                                                                                                                                               |           |              |                                                                                                                                                                                                                                                 |                                                                                                                                                                               |                   |                                                       |           |              |                                                                                                                                                                                                                                                                                                                                                                                                                                                                                                                                    |                                                                                                                                                                                             |
| Other                                                    | Tier 2/3 %                                                                                                                                                                                                                                                                                                                                                                                                                                                                                                                     | 52.8/34.6                                                                                                                                                                                                                                                                                                                                                                                                                                                                                                                                                                                                                                                                                                                                                                                                                                                                                                                                                                                        |   |  |     |     |           |               |        |          |    |           |   |   |                    |   |   |                   |   |   |       |                |           |                                                                                                           |                                                                                                                                                                                                                                                                                                                                                                                                                                                                                                                                                                                                                                                                                                                                                                                                                                                                                                                                                                                                                                                                                                                                                                                                                                                                                                                                                                                                                              |              |                                           |     |                                                                                                                                                                                                                                                                                              |       |                                                                                                                                                                                                                                                                                                                                                                                                                                                                                                                                |                   |                                                                                                                                                                                                                                                                                               |           |              |                                                                                                                                                                                                                                                 |                                                                                                                                                                               |                   |                                                       |           |              |                                                                                                                                                                                                                                                                                                                                                                                                                                                                                                                                    |                                                                                                                                                                                             |
| Name                                                     | Self-Care Social Prescribing                                                                                                                                                                                                                                                                                                                                                                                                                                                                                                   |                                                                                                                                                                                                                                                                                                                                                                                                                                                                                                                                                                                                                                                                                                                                                                                                                                                                                                                                                                                                  |   |  |     |     |           |               |        |          |    |           |   |   |                    |   |   |                   |   |   |       |                |           |                                                                                                           |                                                                                                                                                                                                                                                                                                                                                                                                                                                                                                                                                                                                                                                                                                                                                                                                                                                                                                                                                                                                                                                                                                                                                                                                                                                                                                                                                                                                                              |              |                                           |     |                                                                                                                                                                                                                                                                                              |       |                                                                                                                                                                                                                                                                                                                                                                                                                                                                                                                                |                   |                                                                                                                                                                                                                                                                                               |           |              |                                                                                                                                                                                                                                                 |                                                                                                                                                                               |                   |                                                       |           |              |                                                                                                                                                                                                                                                                                                                                                                                                                                                                                                                                    |                                                                                                                                                                                             |
| Why                                                      | Increase patient confidence in making informed decisions about their health. It is expected to positively contribute to patients' confidence and motivation, which in turn is expected to contribute towards a long-term reduction in use of primary, secondary, and some tertiary services.                                                                                                                                                                                                                                   |                                                                                                                                                                                                                                                                                                                                                                                                                                                                                                                                                                                                                                                                                                                                                                                                                                                                                                                                                                                                  |   |  |     |     |           |               |        |          |    |           |   |   |                    |   |   |                   |   |   |       |                |           |                                                                                                           |                                                                                                                                                                                                                                                                                                                                                                                                                                                                                                                                                                                                                                                                                                                                                                                                                                                                                                                                                                                                                                                                                                                                                                                                                                                                                                                                                                                                                              |              |                                           |     |                                                                                                                                                                                                                                                                                              |       |                                                                                                                                                                                                                                                                                                                                                                                                                                                                                                                                |                   |                                                                                                                                                                                                                                                                                               |           |              |                                                                                                                                                                                                                                                 |                                                                                                                                                                               |                   |                                                       |           |              |                                                                                                                                                                                                                                                                                                                                                                                                                                                                                                                                    |                                                                                                                                                                                             |
| What                                                     | Social prescribing model links patients in primary care with sources of health and wellbeing support from specialist voluntary and community services,<br><br>Step 1: Patient is allocated to a practice-based Health and Social Care Assistant (HSCA) or Case Manager (CM),<br><br>Step 2: Patient assessment, completion of referral form with patient's requirements and notes on their situation - Direct referral to an appropriate service from the Self-Care directory of services,<br><br>Step 3: Referral completion. |                                                                                                                                                                                                                                                                                                                                                                                                                                                                                                                                                                                                                                                                                                                                                                                                                                                                                                                                                                                                  |   |  |     |     |           |               |        |          |    |           |   |   |                    |   |   |                   |   |   |       |                |           |                                                                                                           |                                                                                                                                                                                                                                                                                                                                                                                                                                                                                                                                                                                                                                                                                                                                                                                                                                                                                                                                                                                                                                                                                                                                                                                                                                                                                                                                                                                                                              |              |                                           |     |                                                                                                                                                                                                                                                                                              |       |                                                                                                                                                                                                                                                                                                                                                                                                                                                                                                                                |                   |                                                                                                                                                                                                                                                                                               |           |              |                                                                                                                                                                                                                                                 |                                                                                                                                                                               |                   |                                                       |           |              |                                                                                                                                                                                                                                                                                                                                                                                                                                                                                                                                    |                                                                                                                                                                                             |
| Who provided                                             | Practice-based Health and Social Care Assistant (HSCA) or Case Manager (CM)                                                                                                                                                                                                                                                                                                                                                                                                                                                    |                                                                                                                                                                                                                                                                                                                                                                                                                                                                                                                                                                                                                                                                                                                                                                                                                                                                                                                                                                                                  |   |  |     |     |           |               |        |          |    |           |   |   |                    |   |   |                   |   |   |       |                |           |                                                                                                           |                                                                                                                                                                                                                                                                                                                                                                                                                                                                                                                                                                                                                                                                                                                                                                                                                                                                                                                                                                                                                                                                                                                                                                                                                                                                                                                                                                                                                              |              |                                           |     |                                                                                                                                                                                                                                                                                              |       |                                                                                                                                                                                                                                                                                                                                                                                                                                                                                                                                |                   |                                                                                                                                                                                                                                                                                               |           |              |                                                                                                                                                                                                                                                 |                                                                                                                                                                               |                   |                                                       |           |              |                                                                                                                                                                                                                                                                                                                                                                                                                                                                                                                                    |                                                                                                                                                                                             |
| How                                                      | -                                                                                                                                                                                                                                                                                                                                                                                                                                                                                                                              |                                                                                                                                                                                                                                                                                                                                                                                                                                                                                                                                                                                                                                                                                                                                                                                                                                                                                                                                                                                                  |   |  |     |     |           |               |        |          |    |           |   |   |                    |   |   |                   |   |   |       |                |           |                                                                                                           |                                                                                                                                                                                                                                                                                                                                                                                                                                                                                                                                                                                                                                                                                                                                                                                                                                                                                                                                                                                                                                                                                                                                                                                                                                                                                                                                                                                                                              |              |                                           |     |                                                                                                                                                                                                                                                                                              |       |                                                                                                                                                                                                                                                                                                                                                                                                                                                                                                                                |                   |                                                                                                                                                                                                                                                                                               |           |              |                                                                                                                                                                                                                                                 |                                                                                                                                                                               |                   |                                                       |           |              |                                                                                                                                                                                                                                                                                                                                                                                                                                                                                                                                    |                                                                                                                                                                                             |
| Where                                                    | GP surgeries                                                                                                                                                                                                                                                                                                                                                                                                                                                                                                                   |                                                                                                                                                                                                                                                                                                                                                                                                                                                                                                                                                                                                                                                                                                                                                                                                                                                                                                                                                                                                  |   |  |     |     |           |               |        |          |    |           |   |   |                    |   |   |                   |   |   |       |                |           |                                                                                                           |                                                                                                                                                                                                                                                                                                                                                                                                                                                                                                                                                                                                                                                                                                                                                                                                                                                                                                                                                                                                                                                                                                                                                                                                                                                                                                                                                                                                                              |              |                                           |     |                                                                                                                                                                                                                                                                                              |       |                                                                                                                                                                                                                                                                                                                                                                                                                                                                                                                                |                   |                                                                                                                                                                                                                                                                                               |           |              |                                                                                                                                                                                                                                                 |                                                                                                                                                                               |                   |                                                       |           |              |                                                                                                                                                                                                                                                                                                                                                                                                                                                                                                                                    |                                                                                                                                                                                             |
| When and How Much                                        | Six service sessions after initial patient assessment                                                                                                                                                                                                                                                                                                                                                                                                                                                                          |                                                                                                                                                                                                                                                                                                                                                                                                                                                                                                                                                                                                                                                                                                                                                                                                                                                                                                                                                                                                  |   |  |     |     |           |               |        |          |    |           |   |   |                    |   |   |                   |   |   |       |                |           |                                                                                                           |                                                                                                                                                                                                                                                                                                                                                                                                                                                                                                                                                                                                                                                                                                                                                                                                                                                                                                                                                                                                                                                                                                                                                                                                                                                                                                                                                                                                                              |              |                                           |     |                                                                                                                                                                                                                                                                                              |       |                                                                                                                                                                                                                                                                                                                                                                                                                                                                                                                                |                   |                                                                                                                                                                                                                                                                                               |           |              |                                                                                                                                                                                                                                                 |                                                                                                                                                                               |                   |                                                       |           |              |                                                                                                                                                                                                                                                                                                                                                                                                                                                                                                                                    |                                                                                                                                                                                             |
| Tailoring                                                | Personalized                                                                                                                                                                                                                                                                                                                                                                                                                                                                                                                   |                                                                                                                                                                                                                                                                                                                                                                                                                                                                                                                                                                                                                                                                                                                                                                                                                                                                                                                                                                                                  |   |  |     |     |           |               |        |          |    |           |   |   |                    |   |   |                   |   |   |       |                |           |                                                                                                           |                                                                                                                                                                                                                                                                                                                                                                                                                                                                                                                                                                                                                                                                                                                                                                                                                                                                                                                                                                                                                                                                                                                                                                                                                                                                                                                                                                                                                              |              |                                           |     |                                                                                                                                                                                                                                                                                              |       |                                                                                                                                                                                                                                                                                                                                                                                                                                                                                                                                |                   |                                                                                                                                                                                                                                                                                               |           |              |                                                                                                                                                                                                                                                 |                                                                                                                                                                               |                   |                                                       |           |              |                                                                                                                                                                                                                                                                                                                                                                                                                                                                                                                                    |                                                                                                                                                                                             |

|                               |                                                                                                                                                                                                                                                                                                                                                                                                                                                                                                                                                                                                                                                                                                                                                                                                                                                                                                                                                                                                                                                                                                                               |                                                                                                                                                                                                                                                                                                                                                                                                                                                                                                                                                                                                                                                                                                                                                                                                                                                        |                                     |                                                                                                                                                                                                                                                               |      |                                                 |            |                                                                                |                                                                                                                                |                        |      |           |         |      |                    |                |      |                   |              |    |       |                                                |    |                                                                              |                                                                                                                                                                                                                                                                                                                                                                                                                                                                                                                                                                                                                                                                                                                                                                                                                                                                                                                                                                                                                                                                                                                                                                                                                                                                                                                                                                                                                                                                                                                                                                                                                                                                                                                                                                                                                                                                                                                     |      |                                                                    |     |                                                                                                                                                                                                                                                                                                              |      |                                                                                                                                                                                                                                                                                                                                                                                                                                                                                                                                                                                                                                                                                                                                                                                                                                                                                                                                                                                                                                                                                                                               |              |                                  |     |                              |       |              |                   |                                                              |           |              |                                                                                                                                                                                                                                                                                                                                                                                                                                                                                                                                                                                                                                                                                                                                                                         |                                                                                                                                                                      |
|-------------------------------|-------------------------------------------------------------------------------------------------------------------------------------------------------------------------------------------------------------------------------------------------------------------------------------------------------------------------------------------------------------------------------------------------------------------------------------------------------------------------------------------------------------------------------------------------------------------------------------------------------------------------------------------------------------------------------------------------------------------------------------------------------------------------------------------------------------------------------------------------------------------------------------------------------------------------------------------------------------------------------------------------------------------------------------------------------------------------------------------------------------------------------|--------------------------------------------------------------------------------------------------------------------------------------------------------------------------------------------------------------------------------------------------------------------------------------------------------------------------------------------------------------------------------------------------------------------------------------------------------------------------------------------------------------------------------------------------------------------------------------------------------------------------------------------------------------------------------------------------------------------------------------------------------------------------------------------------------------------------------------------------------|-------------------------------------|---------------------------------------------------------------------------------------------------------------------------------------------------------------------------------------------------------------------------------------------------------------|------|-------------------------------------------------|------------|--------------------------------------------------------------------------------|--------------------------------------------------------------------------------------------------------------------------------|------------------------|------|-----------|---------|------|--------------------|----------------|------|-------------------|--------------|----|-------|------------------------------------------------|----|------------------------------------------------------------------------------|---------------------------------------------------------------------------------------------------------------------------------------------------------------------------------------------------------------------------------------------------------------------------------------------------------------------------------------------------------------------------------------------------------------------------------------------------------------------------------------------------------------------------------------------------------------------------------------------------------------------------------------------------------------------------------------------------------------------------------------------------------------------------------------------------------------------------------------------------------------------------------------------------------------------------------------------------------------------------------------------------------------------------------------------------------------------------------------------------------------------------------------------------------------------------------------------------------------------------------------------------------------------------------------------------------------------------------------------------------------------------------------------------------------------------------------------------------------------------------------------------------------------------------------------------------------------------------------------------------------------------------------------------------------------------------------------------------------------------------------------------------------------------------------------------------------------------------------------------------------------------------------------------------------------|------|--------------------------------------------------------------------|-----|--------------------------------------------------------------------------------------------------------------------------------------------------------------------------------------------------------------------------------------------------------------------------------------------------------------|------|-------------------------------------------------------------------------------------------------------------------------------------------------------------------------------------------------------------------------------------------------------------------------------------------------------------------------------------------------------------------------------------------------------------------------------------------------------------------------------------------------------------------------------------------------------------------------------------------------------------------------------------------------------------------------------------------------------------------------------------------------------------------------------------------------------------------------------------------------------------------------------------------------------------------------------------------------------------------------------------------------------------------------------------------------------------------------------------------------------------------------------|--------------|----------------------------------|-----|------------------------------|-------|--------------|-------------------|--------------------------------------------------------------|-----------|--------------|-------------------------------------------------------------------------------------------------------------------------------------------------------------------------------------------------------------------------------------------------------------------------------------------------------------------------------------------------------------------------------------------------------------------------------------------------------------------------------------------------------------------------------------------------------------------------------------------------------------------------------------------------------------------------------------------------------------------------------------------------------------------------|----------------------------------------------------------------------------------------------------------------------------------------------------------------------|
| <p>Kimberlee 2014 (74,75)</p> | <p>Uncontrolled before-and-after study, mixed-methods</p> <p>Study length: 12 months</p>                                                                                                                                                                                                                                                                                                                                                                                                                                                                                                                                                                                                                                                                                                                                                                                                                                                                                                                                                                                                                                      | <p><b>Inclusion criteria:</b> -</p> <p><b>Exclusion criteria:</b> -</p> <p>Baseline characteristics:</p> <table border="1" data-bbox="477 310 982 636"> <tr> <td>N</td> <td></td> <td>128</td> </tr> <tr> <td>Age</td> <td>Median age</td> <td>36-40</td> </tr> <tr> <td>Gender</td> <td>Female %</td> <td>48.8</td> </tr> <tr> <td>Ethnicity</td> <td>White %</td> <td>83</td> </tr> <tr> <td>Living arrangement</td> <td>Living Alone %</td> <td>37.9</td> </tr> <tr> <td>Employment status</td> <td>Unemployed %</td> <td>40</td> </tr> <tr> <td>Other</td> <td>-</td> <td>-</td> </tr> </table> <p>Population: Unclear</p>                                                                                                                                                                                                                         | N                                   |                                                                                                                                                                                                                                                               | 128  | Age                                             | Median age | 36-40                                                                          | Gender                                                                                                                         | Female %               | 48.8 | Ethnicity | White % | 83   | Living arrangement | Living Alone % | 37.9 | Employment status | Unemployed % | 40 | Other | -                                              | -  | <p>Primary Care</p> <p>Country: UK (Bristol, South West England)</p>         | <table border="1" data-bbox="1308 176 2228 961"> <tr> <td>Name</td> <td>Wellspring Healthy Living Centre's (WHLC) Wellbeing Programme (WP)</td> </tr> <tr> <td>Why</td> <td>Patients presenting with complex mental health needs challenge traditional delivery in general practice, relocate services closer to individuals and the communities where they live.</td> </tr> <tr> <td>What</td> <td>Branching Out -- 1:1 sessions based on the support-worker model and best practice from the Deep Value project of Community Links in East London i.e. the development of a strong, trusting and functioning relationship with a support health worker. Service-users are supported to identify and achieve realistic goals that will improve their self-esteem and expand their life choices, including attending peer-support groups and activities, volunteering, accessing training and employment, and by referring and supporting service-users to counselling, debt advice, parent &amp; family support and housing.<br/><br/>Time-Out Groups -- a weekly session whereby local residents engage in an activity with the aim of improving self-confidence and resilience, forming friendships for mutual support and to reduce isolation. Service-users are then supported to form their own groups around a shared interest such as cooking, physical activity or crafts/art activity. This aims to lessen reliance on workers and helps build resilience, personal responsibility and social wealth back into the community.</td> </tr> <tr> <td>Who provided</td> <td>Male and a female support worker</td> </tr> <tr> <td>How</td> <td>1:1 sessions, group sessions</td> </tr> <tr> <td>Where</td> <td>-</td> </tr> <tr> <td>When and How Much</td> <td>Over 9 weeks, weekly group get-togethers</td> </tr> <tr> <td>Tailoring</td> <td>Personalized</td> </tr> </table> <p>Intervention: Holistic</p> | Name | Wellspring Healthy Living Centre's (WHLC) Wellbeing Programme (WP) | Why | Patients presenting with complex mental health needs challenge traditional delivery in general practice, relocate services closer to individuals and the communities where they live.                                                                                                                        | What | Branching Out -- 1:1 sessions based on the support-worker model and best practice from the Deep Value project of Community Links in East London i.e. the development of a strong, trusting and functioning relationship with a support health worker. Service-users are supported to identify and achieve realistic goals that will improve their self-esteem and expand their life choices, including attending peer-support groups and activities, volunteering, accessing training and employment, and by referring and supporting service-users to counselling, debt advice, parent & family support and housing.<br><br>Time-Out Groups -- a weekly session whereby local residents engage in an activity with the aim of improving self-confidence and resilience, forming friendships for mutual support and to reduce isolation. Service-users are then supported to form their own groups around a shared interest such as cooking, physical activity or crafts/art activity. This aims to lessen reliance on workers and helps build resilience, personal responsibility and social wealth back into the community. | Who provided | Male and a female support worker | How | 1:1 sessions, group sessions | Where | -            | When and How Much | Over 9 weeks, weekly group get-togethers                     | Tailoring | Personalized | <p>Patient outcomes at baseline and at least 3 months later:</p> <ul style="list-style-type: none"> <li>- Patient Health Questionnaire (PHQ-9)</li> <li>- Generalised anxiety disorder-7 scale</li> <li>- Friendship scale</li> <li>- Office for National Statistics Wellbeing Scale</li> <li>- International Physical Activity Questionnaire</li> <li>- Wellspring Wellbeing Questionnaire</li> </ul> <p>Process of care measures 12 months before and after BO enrolment, subgroups analysed:</p> <ul style="list-style-type: none"> <li>- Number of GP telephone contacts</li> <li>- Number of GP face-to-face contacts</li> <li>- Employment</li> </ul> <p>Economic evaluation:</p> <ul style="list-style-type: none"> <li>- Social Return on Investment</li> </ul> | <p>Peer-Review: Partly (1/2)</p> <p>Funding source: Predominantly by the Henry Smith and Tudor Trust</p> <p>Declarations of interest: Unknown</p>                    |
| N                             |                                                                                                                                                                                                                                                                                                                                                                                                                                                                                                                                                                                                                                                                                                                                                                                                                                                                                                                                                                                                                                                                                                                               | 128                                                                                                                                                                                                                                                                                                                                                                                                                                                                                                                                                                                                                                                                                                                                                                                                                                                    |                                     |                                                                                                                                                                                                                                                               |      |                                                 |            |                                                                                |                                                                                                                                |                        |      |           |         |      |                    |                |      |                   |              |    |       |                                                |    |                                                                              |                                                                                                                                                                                                                                                                                                                                                                                                                                                                                                                                                                                                                                                                                                                                                                                                                                                                                                                                                                                                                                                                                                                                                                                                                                                                                                                                                                                                                                                                                                                                                                                                                                                                                                                                                                                                                                                                                                                     |      |                                                                    |     |                                                                                                                                                                                                                                                                                                              |      |                                                                                                                                                                                                                                                                                                                                                                                                                                                                                                                                                                                                                                                                                                                                                                                                                                                                                                                                                                                                                                                                                                                               |              |                                  |     |                              |       |              |                   |                                                              |           |              |                                                                                                                                                                                                                                                                                                                                                                                                                                                                                                                                                                                                                                                                                                                                                                         |                                                                                                                                                                      |
| Age                           | Median age                                                                                                                                                                                                                                                                                                                                                                                                                                                                                                                                                                                                                                                                                                                                                                                                                                                                                                                                                                                                                                                                                                                    | 36-40                                                                                                                                                                                                                                                                                                                                                                                                                                                                                                                                                                                                                                                                                                                                                                                                                                                  |                                     |                                                                                                                                                                                                                                                               |      |                                                 |            |                                                                                |                                                                                                                                |                        |      |           |         |      |                    |                |      |                   |              |    |       |                                                |    |                                                                              |                                                                                                                                                                                                                                                                                                                                                                                                                                                                                                                                                                                                                                                                                                                                                                                                                                                                                                                                                                                                                                                                                                                                                                                                                                                                                                                                                                                                                                                                                                                                                                                                                                                                                                                                                                                                                                                                                                                     |      |                                                                    |     |                                                                                                                                                                                                                                                                                                              |      |                                                                                                                                                                                                                                                                                                                                                                                                                                                                                                                                                                                                                                                                                                                                                                                                                                                                                                                                                                                                                                                                                                                               |              |                                  |     |                              |       |              |                   |                                                              |           |              |                                                                                                                                                                                                                                                                                                                                                                                                                                                                                                                                                                                                                                                                                                                                                                         |                                                                                                                                                                      |
| Gender                        | Female %                                                                                                                                                                                                                                                                                                                                                                                                                                                                                                                                                                                                                                                                                                                                                                                                                                                                                                                                                                                                                                                                                                                      | 48.8                                                                                                                                                                                                                                                                                                                                                                                                                                                                                                                                                                                                                                                                                                                                                                                                                                                   |                                     |                                                                                                                                                                                                                                                               |      |                                                 |            |                                                                                |                                                                                                                                |                        |      |           |         |      |                    |                |      |                   |              |    |       |                                                |    |                                                                              |                                                                                                                                                                                                                                                                                                                                                                                                                                                                                                                                                                                                                                                                                                                                                                                                                                                                                                                                                                                                                                                                                                                                                                                                                                                                                                                                                                                                                                                                                                                                                                                                                                                                                                                                                                                                                                                                                                                     |      |                                                                    |     |                                                                                                                                                                                                                                                                                                              |      |                                                                                                                                                                                                                                                                                                                                                                                                                                                                                                                                                                                                                                                                                                                                                                                                                                                                                                                                                                                                                                                                                                                               |              |                                  |     |                              |       |              |                   |                                                              |           |              |                                                                                                                                                                                                                                                                                                                                                                                                                                                                                                                                                                                                                                                                                                                                                                         |                                                                                                                                                                      |
| Ethnicity                     | White %                                                                                                                                                                                                                                                                                                                                                                                                                                                                                                                                                                                                                                                                                                                                                                                                                                                                                                                                                                                                                                                                                                                       | 83                                                                                                                                                                                                                                                                                                                                                                                                                                                                                                                                                                                                                                                                                                                                                                                                                                                     |                                     |                                                                                                                                                                                                                                                               |      |                                                 |            |                                                                                |                                                                                                                                |                        |      |           |         |      |                    |                |      |                   |              |    |       |                                                |    |                                                                              |                                                                                                                                                                                                                                                                                                                                                                                                                                                                                                                                                                                                                                                                                                                                                                                                                                                                                                                                                                                                                                                                                                                                                                                                                                                                                                                                                                                                                                                                                                                                                                                                                                                                                                                                                                                                                                                                                                                     |      |                                                                    |     |                                                                                                                                                                                                                                                                                                              |      |                                                                                                                                                                                                                                                                                                                                                                                                                                                                                                                                                                                                                                                                                                                                                                                                                                                                                                                                                                                                                                                                                                                               |              |                                  |     |                              |       |              |                   |                                                              |           |              |                                                                                                                                                                                                                                                                                                                                                                                                                                                                                                                                                                                                                                                                                                                                                                         |                                                                                                                                                                      |
| Living arrangement            | Living Alone %                                                                                                                                                                                                                                                                                                                                                                                                                                                                                                                                                                                                                                                                                                                                                                                                                                                                                                                                                                                                                                                                                                                | 37.9                                                                                                                                                                                                                                                                                                                                                                                                                                                                                                                                                                                                                                                                                                                                                                                                                                                   |                                     |                                                                                                                                                                                                                                                               |      |                                                 |            |                                                                                |                                                                                                                                |                        |      |           |         |      |                    |                |      |                   |              |    |       |                                                |    |                                                                              |                                                                                                                                                                                                                                                                                                                                                                                                                                                                                                                                                                                                                                                                                                                                                                                                                                                                                                                                                                                                                                                                                                                                                                                                                                                                                                                                                                                                                                                                                                                                                                                                                                                                                                                                                                                                                                                                                                                     |      |                                                                    |     |                                                                                                                                                                                                                                                                                                              |      |                                                                                                                                                                                                                                                                                                                                                                                                                                                                                                                                                                                                                                                                                                                                                                                                                                                                                                                                                                                                                                                                                                                               |              |                                  |     |                              |       |              |                   |                                                              |           |              |                                                                                                                                                                                                                                                                                                                                                                                                                                                                                                                                                                                                                                                                                                                                                                         |                                                                                                                                                                      |
| Employment status             | Unemployed %                                                                                                                                                                                                                                                                                                                                                                                                                                                                                                                                                                                                                                                                                                                                                                                                                                                                                                                                                                                                                                                                                                                  | 40                                                                                                                                                                                                                                                                                                                                                                                                                                                                                                                                                                                                                                                                                                                                                                                                                                                     |                                     |                                                                                                                                                                                                                                                               |      |                                                 |            |                                                                                |                                                                                                                                |                        |      |           |         |      |                    |                |      |                   |              |    |       |                                                |    |                                                                              |                                                                                                                                                                                                                                                                                                                                                                                                                                                                                                                                                                                                                                                                                                                                                                                                                                                                                                                                                                                                                                                                                                                                                                                                                                                                                                                                                                                                                                                                                                                                                                                                                                                                                                                                                                                                                                                                                                                     |      |                                                                    |     |                                                                                                                                                                                                                                                                                                              |      |                                                                                                                                                                                                                                                                                                                                                                                                                                                                                                                                                                                                                                                                                                                                                                                                                                                                                                                                                                                                                                                                                                                               |              |                                  |     |                              |       |              |                   |                                                              |           |              |                                                                                                                                                                                                                                                                                                                                                                                                                                                                                                                                                                                                                                                                                                                                                                         |                                                                                                                                                                      |
| Other                         | -                                                                                                                                                                                                                                                                                                                                                                                                                                                                                                                                                                                                                                                                                                                                                                                                                                                                                                                                                                                                                                                                                                                             | -                                                                                                                                                                                                                                                                                                                                                                                                                                                                                                                                                                                                                                                                                                                                                                                                                                                      |                                     |                                                                                                                                                                                                                                                               |      |                                                 |            |                                                                                |                                                                                                                                |                        |      |           |         |      |                    |                |      |                   |              |    |       |                                                |    |                                                                              |                                                                                                                                                                                                                                                                                                                                                                                                                                                                                                                                                                                                                                                                                                                                                                                                                                                                                                                                                                                                                                                                                                                                                                                                                                                                                                                                                                                                                                                                                                                                                                                                                                                                                                                                                                                                                                                                                                                     |      |                                                                    |     |                                                                                                                                                                                                                                                                                                              |      |                                                                                                                                                                                                                                                                                                                                                                                                                                                                                                                                                                                                                                                                                                                                                                                                                                                                                                                                                                                                                                                                                                                               |              |                                  |     |                              |       |              |                   |                                                              |           |              |                                                                                                                                                                                                                                                                                                                                                                                                                                                                                                                                                                                                                                                                                                                                                                         |                                                                                                                                                                      |
| Name                          | Wellspring Healthy Living Centre's (WHLC) Wellbeing Programme (WP)                                                                                                                                                                                                                                                                                                                                                                                                                                                                                                                                                                                                                                                                                                                                                                                                                                                                                                                                                                                                                                                            |                                                                                                                                                                                                                                                                                                                                                                                                                                                                                                                                                                                                                                                                                                                                                                                                                                                        |                                     |                                                                                                                                                                                                                                                               |      |                                                 |            |                                                                                |                                                                                                                                |                        |      |           |         |      |                    |                |      |                   |              |    |       |                                                |    |                                                                              |                                                                                                                                                                                                                                                                                                                                                                                                                                                                                                                                                                                                                                                                                                                                                                                                                                                                                                                                                                                                                                                                                                                                                                                                                                                                                                                                                                                                                                                                                                                                                                                                                                                                                                                                                                                                                                                                                                                     |      |                                                                    |     |                                                                                                                                                                                                                                                                                                              |      |                                                                                                                                                                                                                                                                                                                                                                                                                                                                                                                                                                                                                                                                                                                                                                                                                                                                                                                                                                                                                                                                                                                               |              |                                  |     |                              |       |              |                   |                                                              |           |              |                                                                                                                                                                                                                                                                                                                                                                                                                                                                                                                                                                                                                                                                                                                                                                         |                                                                                                                                                                      |
| Why                           | Patients presenting with complex mental health needs challenge traditional delivery in general practice, relocate services closer to individuals and the communities where they live.                                                                                                                                                                                                                                                                                                                                                                                                                                                                                                                                                                                                                                                                                                                                                                                                                                                                                                                                         |                                                                                                                                                                                                                                                                                                                                                                                                                                                                                                                                                                                                                                                                                                                                                                                                                                                        |                                     |                                                                                                                                                                                                                                                               |      |                                                 |            |                                                                                |                                                                                                                                |                        |      |           |         |      |                    |                |      |                   |              |    |       |                                                |    |                                                                              |                                                                                                                                                                                                                                                                                                                                                                                                                                                                                                                                                                                                                                                                                                                                                                                                                                                                                                                                                                                                                                                                                                                                                                                                                                                                                                                                                                                                                                                                                                                                                                                                                                                                                                                                                                                                                                                                                                                     |      |                                                                    |     |                                                                                                                                                                                                                                                                                                              |      |                                                                                                                                                                                                                                                                                                                                                                                                                                                                                                                                                                                                                                                                                                                                                                                                                                                                                                                                                                                                                                                                                                                               |              |                                  |     |                              |       |              |                   |                                                              |           |              |                                                                                                                                                                                                                                                                                                                                                                                                                                                                                                                                                                                                                                                                                                                                                                         |                                                                                                                                                                      |
| What                          | Branching Out -- 1:1 sessions based on the support-worker model and best practice from the Deep Value project of Community Links in East London i.e. the development of a strong, trusting and functioning relationship with a support health worker. Service-users are supported to identify and achieve realistic goals that will improve their self-esteem and expand their life choices, including attending peer-support groups and activities, volunteering, accessing training and employment, and by referring and supporting service-users to counselling, debt advice, parent & family support and housing.<br><br>Time-Out Groups -- a weekly session whereby local residents engage in an activity with the aim of improving self-confidence and resilience, forming friendships for mutual support and to reduce isolation. Service-users are then supported to form their own groups around a shared interest such as cooking, physical activity or crafts/art activity. This aims to lessen reliance on workers and helps build resilience, personal responsibility and social wealth back into the community. |                                                                                                                                                                                                                                                                                                                                                                                                                                                                                                                                                                                                                                                                                                                                                                                                                                                        |                                     |                                                                                                                                                                                                                                                               |      |                                                 |            |                                                                                |                                                                                                                                |                        |      |           |         |      |                    |                |      |                   |              |    |       |                                                |    |                                                                              |                                                                                                                                                                                                                                                                                                                                                                                                                                                                                                                                                                                                                                                                                                                                                                                                                                                                                                                                                                                                                                                                                                                                                                                                                                                                                                                                                                                                                                                                                                                                                                                                                                                                                                                                                                                                                                                                                                                     |      |                                                                    |     |                                                                                                                                                                                                                                                                                                              |      |                                                                                                                                                                                                                                                                                                                                                                                                                                                                                                                                                                                                                                                                                                                                                                                                                                                                                                                                                                                                                                                                                                                               |              |                                  |     |                              |       |              |                   |                                                              |           |              |                                                                                                                                                                                                                                                                                                                                                                                                                                                                                                                                                                                                                                                                                                                                                                         |                                                                                                                                                                      |
| Who provided                  | Male and a female support worker                                                                                                                                                                                                                                                                                                                                                                                                                                                                                                                                                                                                                                                                                                                                                                                                                                                                                                                                                                                                                                                                                              |                                                                                                                                                                                                                                                                                                                                                                                                                                                                                                                                                                                                                                                                                                                                                                                                                                                        |                                     |                                                                                                                                                                                                                                                               |      |                                                 |            |                                                                                |                                                                                                                                |                        |      |           |         |      |                    |                |      |                   |              |    |       |                                                |    |                                                                              |                                                                                                                                                                                                                                                                                                                                                                                                                                                                                                                                                                                                                                                                                                                                                                                                                                                                                                                                                                                                                                                                                                                                                                                                                                                                                                                                                                                                                                                                                                                                                                                                                                                                                                                                                                                                                                                                                                                     |      |                                                                    |     |                                                                                                                                                                                                                                                                                                              |      |                                                                                                                                                                                                                                                                                                                                                                                                                                                                                                                                                                                                                                                                                                                                                                                                                                                                                                                                                                                                                                                                                                                               |              |                                  |     |                              |       |              |                   |                                                              |           |              |                                                                                                                                                                                                                                                                                                                                                                                                                                                                                                                                                                                                                                                                                                                                                                         |                                                                                                                                                                      |
| How                           | 1:1 sessions, group sessions                                                                                                                                                                                                                                                                                                                                                                                                                                                                                                                                                                                                                                                                                                                                                                                                                                                                                                                                                                                                                                                                                                  |                                                                                                                                                                                                                                                                                                                                                                                                                                                                                                                                                                                                                                                                                                                                                                                                                                                        |                                     |                                                                                                                                                                                                                                                               |      |                                                 |            |                                                                                |                                                                                                                                |                        |      |           |         |      |                    |                |      |                   |              |    |       |                                                |    |                                                                              |                                                                                                                                                                                                                                                                                                                                                                                                                                                                                                                                                                                                                                                                                                                                                                                                                                                                                                                                                                                                                                                                                                                                                                                                                                                                                                                                                                                                                                                                                                                                                                                                                                                                                                                                                                                                                                                                                                                     |      |                                                                    |     |                                                                                                                                                                                                                                                                                                              |      |                                                                                                                                                                                                                                                                                                                                                                                                                                                                                                                                                                                                                                                                                                                                                                                                                                                                                                                                                                                                                                                                                                                               |              |                                  |     |                              |       |              |                   |                                                              |           |              |                                                                                                                                                                                                                                                                                                                                                                                                                                                                                                                                                                                                                                                                                                                                                                         |                                                                                                                                                                      |
| Where                         | -                                                                                                                                                                                                                                                                                                                                                                                                                                                                                                                                                                                                                                                                                                                                                                                                                                                                                                                                                                                                                                                                                                                             |                                                                                                                                                                                                                                                                                                                                                                                                                                                                                                                                                                                                                                                                                                                                                                                                                                                        |                                     |                                                                                                                                                                                                                                                               |      |                                                 |            |                                                                                |                                                                                                                                |                        |      |           |         |      |                    |                |      |                   |              |    |       |                                                |    |                                                                              |                                                                                                                                                                                                                                                                                                                                                                                                                                                                                                                                                                                                                                                                                                                                                                                                                                                                                                                                                                                                                                                                                                                                                                                                                                                                                                                                                                                                                                                                                                                                                                                                                                                                                                                                                                                                                                                                                                                     |      |                                                                    |     |                                                                                                                                                                                                                                                                                                              |      |                                                                                                                                                                                                                                                                                                                                                                                                                                                                                                                                                                                                                                                                                                                                                                                                                                                                                                                                                                                                                                                                                                                               |              |                                  |     |                              |       |              |                   |                                                              |           |              |                                                                                                                                                                                                                                                                                                                                                                                                                                                                                                                                                                                                                                                                                                                                                                         |                                                                                                                                                                      |
| When and How Much             | Over 9 weeks, weekly group get-togethers                                                                                                                                                                                                                                                                                                                                                                                                                                                                                                                                                                                                                                                                                                                                                                                                                                                                                                                                                                                                                                                                                      |                                                                                                                                                                                                                                                                                                                                                                                                                                                                                                                                                                                                                                                                                                                                                                                                                                                        |                                     |                                                                                                                                                                                                                                                               |      |                                                 |            |                                                                                |                                                                                                                                |                        |      |           |         |      |                    |                |      |                   |              |    |       |                                                |    |                                                                              |                                                                                                                                                                                                                                                                                                                                                                                                                                                                                                                                                                                                                                                                                                                                                                                                                                                                                                                                                                                                                                                                                                                                                                                                                                                                                                                                                                                                                                                                                                                                                                                                                                                                                                                                                                                                                                                                                                                     |      |                                                                    |     |                                                                                                                                                                                                                                                                                                              |      |                                                                                                                                                                                                                                                                                                                                                                                                                                                                                                                                                                                                                                                                                                                                                                                                                                                                                                                                                                                                                                                                                                                               |              |                                  |     |                              |       |              |                   |                                                              |           |              |                                                                                                                                                                                                                                                                                                                                                                                                                                                                                                                                                                                                                                                                                                                                                                         |                                                                                                                                                                      |
| Tailoring                     | Personalized                                                                                                                                                                                                                                                                                                                                                                                                                                                                                                                                                                                                                                                                                                                                                                                                                                                                                                                                                                                                                                                                                                                  |                                                                                                                                                                                                                                                                                                                                                                                                                                                                                                                                                                                                                                                                                                                                                                                                                                                        |                                     |                                                                                                                                                                                                                                                               |      |                                                 |            |                                                                                |                                                                                                                                |                        |      |           |         |      |                    |                |      |                   |              |    |       |                                                |    |                                                                              |                                                                                                                                                                                                                                                                                                                                                                                                                                                                                                                                                                                                                                                                                                                                                                                                                                                                                                                                                                                                                                                                                                                                                                                                                                                                                                                                                                                                                                                                                                                                                                                                                                                                                                                                                                                                                                                                                                                     |      |                                                                    |     |                                                                                                                                                                                                                                                                                                              |      |                                                                                                                                                                                                                                                                                                                                                                                                                                                                                                                                                                                                                                                                                                                                                                                                                                                                                                                                                                                                                                                                                                                               |              |                                  |     |                              |       |              |                   |                                                              |           |              |                                                                                                                                                                                                                                                                                                                                                                                                                                                                                                                                                                                                                                                                                                                                                                         |                                                                                                                                                                      |
| <p>Kimberlee 2016 (76)</p>    | <p>Uncontrolled before-and-after study, mixed-methods</p> <p>Study length: -</p>                                                                                                                                                                                                                                                                                                                                                                                                                                                                                                                                                                                                                                                                                                                                                                                                                                                                                                                                                                                                                                              | <p><b>Inclusion criteria:</b></p> <p>Initially social prescribing was aimed at patient groups who were perceived as frequent attenders in primary care. These were vulnerable and at risk groups and people with long-term conditions.</p> <p><b>Exclusion criteria:</b> -</p> <p>Baseline characteristics:</p> <table border="1" data-bbox="477 1283 982 1682"> <tr> <td>N</td> <td></td> <td>2047</td> </tr> <tr> <td>Age</td> <td>Mean (SD)</td> <td></td> </tr> <tr> <td>Gender</td> <td>Female %</td> <td>60.2</td> </tr> <tr> <td>Ethnicity</td> <td>White %</td> <td>98.8</td> </tr> <tr> <td>Living arrangement</td> <td>-</td> <td>-</td> </tr> <tr> <td>Employment status</td> <td>-</td> <td>-</td> </tr> <tr> <td>Other</td> <td>Referral reason mental health and well being %</td> <td>48</td> </tr> </table> <p>Population: General</p> | N                                   |                                                                                                                                                                                                                                                               | 2047 | Age                                             | Mean (SD)  |                                                                                | Gender                                                                                                                         | Female %               | 60.2 | Ethnicity | White % | 98.8 | Living arrangement | -              | -    | Employment status | -            | -  | Other | Referral reason mental health and well being % | 48 | <p>Primary Care</p> <p>Country: UK (Gloucestershire, South West England)</p> | <table border="1" data-bbox="1308 1052 2228 1650"> <tr> <td>Name</td> <td>Gloucestershire social prescribing</td> </tr> <tr> <td>Why</td> <td>Ensure individuals are able to make informed choices to manage their self-care and wellbeing needs, advise individuals how to access support networks, support and enable positive risk management and risk taking to maximize independence and choice, reduce use of statutory services, where appropriate.</td> </tr> <tr> <td>What</td> <td>A hub coordination model was advised with coordinators based in GP Practices. However, the intention was that the model going forward should be a mixture of formal referral and signposting. This would involve formal referral to larger third sector partners with paid staff who could then potentially act as caseworkers and informal signposting to a range of smaller, community level organisations and groups.</td> </tr> <tr> <td>Who provided</td> <td>Hub coordinator</td> </tr> <tr> <td>How</td> <td>Face-to-face</td> </tr> <tr> <td>Where</td> <td>GP surgeries</td> </tr> <tr> <td>When and How Much</td> <td>Coordinators' time with a patient once referred also varies.</td> </tr> <tr> <td>Tailoring</td> <td>Personalized</td> </tr> </table> <p>Intervention: Medium</p>                                                                                                                                                                                                                                                                                                                                                                                                                                                                                                                                                                                                                       | Name | Gloucestershire social prescribing                                 | Why | Ensure individuals are able to make informed choices to manage their self-care and wellbeing needs, advise individuals how to access support networks, support and enable positive risk management and risk taking to maximize independence and choice, reduce use of statutory services, where appropriate. | What | A hub coordination model was advised with coordinators based in GP Practices. However, the intention was that the model going forward should be a mixture of formal referral and signposting. This would involve formal referral to larger third sector partners with paid staff who could then potentially act as caseworkers and informal signposting to a range of smaller, community level organisations and groups.                                                                                                                                                                                                                                                                                                                                                                                                                                                                                                                                                                                                                                                                                                      | Who provided | Hub coordinator                  | How | Face-to-face                 | Where | GP surgeries | When and How Much | Coordinators' time with a patient once referred also varies. | Tailoring | Personalized | <p>Patient outcomes:</p> <ul style="list-style-type: none"> <li>- Warwick Edinburgh Mental Wellbeing Scale</li> <li>- Patient Health Questionnaire (PHQ-9)</li> </ul> <p>Process of care measures:</p> <ul style="list-style-type: none"> <li>- A&amp;E admissions</li> <li>- A&amp;E attendance</li> <li>- GP visits</li> <li>- Home visits</li> <li>- Telephone calls</li> </ul> <p>Six months before and after referral.</p> <ul style="list-style-type: none"> <li>- Economic evaluation</li> <li>- Social Return on Investment</li> </ul>                                                                                                                                                                                                                          | <p>Peer-Review: No</p> <p>Funding source: Gloucestershire Clinical Commissioning Group, Prime Minister's Challenge Fund</p> <p>Declarations of interest: Unknown</p> |
| N                             |                                                                                                                                                                                                                                                                                                                                                                                                                                                                                                                                                                                                                                                                                                                                                                                                                                                                                                                                                                                                                                                                                                                               | 2047                                                                                                                                                                                                                                                                                                                                                                                                                                                                                                                                                                                                                                                                                                                                                                                                                                                   |                                     |                                                                                                                                                                                                                                                               |      |                                                 |            |                                                                                |                                                                                                                                |                        |      |           |         |      |                    |                |      |                   |              |    |       |                                                |    |                                                                              |                                                                                                                                                                                                                                                                                                                                                                                                                                                                                                                                                                                                                                                                                                                                                                                                                                                                                                                                                                                                                                                                                                                                                                                                                                                                                                                                                                                                                                                                                                                                                                                                                                                                                                                                                                                                                                                                                                                     |      |                                                                    |     |                                                                                                                                                                                                                                                                                                              |      |                                                                                                                                                                                                                                                                                                                                                                                                                                                                                                                                                                                                                                                                                                                                                                                                                                                                                                                                                                                                                                                                                                                               |              |                                  |     |                              |       |              |                   |                                                              |           |              |                                                                                                                                                                                                                                                                                                                                                                                                                                                                                                                                                                                                                                                                                                                                                                         |                                                                                                                                                                      |
| Age                           | Mean (SD)                                                                                                                                                                                                                                                                                                                                                                                                                                                                                                                                                                                                                                                                                                                                                                                                                                                                                                                                                                                                                                                                                                                     |                                                                                                                                                                                                                                                                                                                                                                                                                                                                                                                                                                                                                                                                                                                                                                                                                                                        |                                     |                                                                                                                                                                                                                                                               |      |                                                 |            |                                                                                |                                                                                                                                |                        |      |           |         |      |                    |                |      |                   |              |    |       |                                                |    |                                                                              |                                                                                                                                                                                                                                                                                                                                                                                                                                                                                                                                                                                                                                                                                                                                                                                                                                                                                                                                                                                                                                                                                                                                                                                                                                                                                                                                                                                                                                                                                                                                                                                                                                                                                                                                                                                                                                                                                                                     |      |                                                                    |     |                                                                                                                                                                                                                                                                                                              |      |                                                                                                                                                                                                                                                                                                                                                                                                                                                                                                                                                                                                                                                                                                                                                                                                                                                                                                                                                                                                                                                                                                                               |              |                                  |     |                              |       |              |                   |                                                              |           |              |                                                                                                                                                                                                                                                                                                                                                                                                                                                                                                                                                                                                                                                                                                                                                                         |                                                                                                                                                                      |
| Gender                        | Female %                                                                                                                                                                                                                                                                                                                                                                                                                                                                                                                                                                                                                                                                                                                                                                                                                                                                                                                                                                                                                                                                                                                      | 60.2                                                                                                                                                                                                                                                                                                                                                                                                                                                                                                                                                                                                                                                                                                                                                                                                                                                   |                                     |                                                                                                                                                                                                                                                               |      |                                                 |            |                                                                                |                                                                                                                                |                        |      |           |         |      |                    |                |      |                   |              |    |       |                                                |    |                                                                              |                                                                                                                                                                                                                                                                                                                                                                                                                                                                                                                                                                                                                                                                                                                                                                                                                                                                                                                                                                                                                                                                                                                                                                                                                                                                                                                                                                                                                                                                                                                                                                                                                                                                                                                                                                                                                                                                                                                     |      |                                                                    |     |                                                                                                                                                                                                                                                                                                              |      |                                                                                                                                                                                                                                                                                                                                                                                                                                                                                                                                                                                                                                                                                                                                                                                                                                                                                                                                                                                                                                                                                                                               |              |                                  |     |                              |       |              |                   |                                                              |           |              |                                                                                                                                                                                                                                                                                                                                                                                                                                                                                                                                                                                                                                                                                                                                                                         |                                                                                                                                                                      |
| Ethnicity                     | White %                                                                                                                                                                                                                                                                                                                                                                                                                                                                                                                                                                                                                                                                                                                                                                                                                                                                                                                                                                                                                                                                                                                       | 98.8                                                                                                                                                                                                                                                                                                                                                                                                                                                                                                                                                                                                                                                                                                                                                                                                                                                   |                                     |                                                                                                                                                                                                                                                               |      |                                                 |            |                                                                                |                                                                                                                                |                        |      |           |         |      |                    |                |      |                   |              |    |       |                                                |    |                                                                              |                                                                                                                                                                                                                                                                                                                                                                                                                                                                                                                                                                                                                                                                                                                                                                                                                                                                                                                                                                                                                                                                                                                                                                                                                                                                                                                                                                                                                                                                                                                                                                                                                                                                                                                                                                                                                                                                                                                     |      |                                                                    |     |                                                                                                                                                                                                                                                                                                              |      |                                                                                                                                                                                                                                                                                                                                                                                                                                                                                                                                                                                                                                                                                                                                                                                                                                                                                                                                                                                                                                                                                                                               |              |                                  |     |                              |       |              |                   |                                                              |           |              |                                                                                                                                                                                                                                                                                                                                                                                                                                                                                                                                                                                                                                                                                                                                                                         |                                                                                                                                                                      |
| Living arrangement            | -                                                                                                                                                                                                                                                                                                                                                                                                                                                                                                                                                                                                                                                                                                                                                                                                                                                                                                                                                                                                                                                                                                                             | -                                                                                                                                                                                                                                                                                                                                                                                                                                                                                                                                                                                                                                                                                                                                                                                                                                                      |                                     |                                                                                                                                                                                                                                                               |      |                                                 |            |                                                                                |                                                                                                                                |                        |      |           |         |      |                    |                |      |                   |              |    |       |                                                |    |                                                                              |                                                                                                                                                                                                                                                                                                                                                                                                                                                                                                                                                                                                                                                                                                                                                                                                                                                                                                                                                                                                                                                                                                                                                                                                                                                                                                                                                                                                                                                                                                                                                                                                                                                                                                                                                                                                                                                                                                                     |      |                                                                    |     |                                                                                                                                                                                                                                                                                                              |      |                                                                                                                                                                                                                                                                                                                                                                                                                                                                                                                                                                                                                                                                                                                                                                                                                                                                                                                                                                                                                                                                                                                               |              |                                  |     |                              |       |              |                   |                                                              |           |              |                                                                                                                                                                                                                                                                                                                                                                                                                                                                                                                                                                                                                                                                                                                                                                         |                                                                                                                                                                      |
| Employment status             | -                                                                                                                                                                                                                                                                                                                                                                                                                                                                                                                                                                                                                                                                                                                                                                                                                                                                                                                                                                                                                                                                                                                             | -                                                                                                                                                                                                                                                                                                                                                                                                                                                                                                                                                                                                                                                                                                                                                                                                                                                      |                                     |                                                                                                                                                                                                                                                               |      |                                                 |            |                                                                                |                                                                                                                                |                        |      |           |         |      |                    |                |      |                   |              |    |       |                                                |    |                                                                              |                                                                                                                                                                                                                                                                                                                                                                                                                                                                                                                                                                                                                                                                                                                                                                                                                                                                                                                                                                                                                                                                                                                                                                                                                                                                                                                                                                                                                                                                                                                                                                                                                                                                                                                                                                                                                                                                                                                     |      |                                                                    |     |                                                                                                                                                                                                                                                                                                              |      |                                                                                                                                                                                                                                                                                                                                                                                                                                                                                                                                                                                                                                                                                                                                                                                                                                                                                                                                                                                                                                                                                                                               |              |                                  |     |                              |       |              |                   |                                                              |           |              |                                                                                                                                                                                                                                                                                                                                                                                                                                                                                                                                                                                                                                                                                                                                                                         |                                                                                                                                                                      |
| Other                         | Referral reason mental health and well being %                                                                                                                                                                                                                                                                                                                                                                                                                                                                                                                                                                                                                                                                                                                                                                                                                                                                                                                                                                                                                                                                                | 48                                                                                                                                                                                                                                                                                                                                                                                                                                                                                                                                                                                                                                                                                                                                                                                                                                                     |                                     |                                                                                                                                                                                                                                                               |      |                                                 |            |                                                                                |                                                                                                                                |                        |      |           |         |      |                    |                |      |                   |              |    |       |                                                |    |                                                                              |                                                                                                                                                                                                                                                                                                                                                                                                                                                                                                                                                                                                                                                                                                                                                                                                                                                                                                                                                                                                                                                                                                                                                                                                                                                                                                                                                                                                                                                                                                                                                                                                                                                                                                                                                                                                                                                                                                                     |      |                                                                    |     |                                                                                                                                                                                                                                                                                                              |      |                                                                                                                                                                                                                                                                                                                                                                                                                                                                                                                                                                                                                                                                                                                                                                                                                                                                                                                                                                                                                                                                                                                               |              |                                  |     |                              |       |              |                   |                                                              |           |              |                                                                                                                                                                                                                                                                                                                                                                                                                                                                                                                                                                                                                                                                                                                                                                         |                                                                                                                                                                      |
| Name                          | Gloucestershire social prescribing                                                                                                                                                                                                                                                                                                                                                                                                                                                                                                                                                                                                                                                                                                                                                                                                                                                                                                                                                                                                                                                                                            |                                                                                                                                                                                                                                                                                                                                                                                                                                                                                                                                                                                                                                                                                                                                                                                                                                                        |                                     |                                                                                                                                                                                                                                                               |      |                                                 |            |                                                                                |                                                                                                                                |                        |      |           |         |      |                    |                |      |                   |              |    |       |                                                |    |                                                                              |                                                                                                                                                                                                                                                                                                                                                                                                                                                                                                                                                                                                                                                                                                                                                                                                                                                                                                                                                                                                                                                                                                                                                                                                                                                                                                                                                                                                                                                                                                                                                                                                                                                                                                                                                                                                                                                                                                                     |      |                                                                    |     |                                                                                                                                                                                                                                                                                                              |      |                                                                                                                                                                                                                                                                                                                                                                                                                                                                                                                                                                                                                                                                                                                                                                                                                                                                                                                                                                                                                                                                                                                               |              |                                  |     |                              |       |              |                   |                                                              |           |              |                                                                                                                                                                                                                                                                                                                                                                                                                                                                                                                                                                                                                                                                                                                                                                         |                                                                                                                                                                      |
| Why                           | Ensure individuals are able to make informed choices to manage their self-care and wellbeing needs, advise individuals how to access support networks, support and enable positive risk management and risk taking to maximize independence and choice, reduce use of statutory services, where appropriate.                                                                                                                                                                                                                                                                                                                                                                                                                                                                                                                                                                                                                                                                                                                                                                                                                  |                                                                                                                                                                                                                                                                                                                                                                                                                                                                                                                                                                                                                                                                                                                                                                                                                                                        |                                     |                                                                                                                                                                                                                                                               |      |                                                 |            |                                                                                |                                                                                                                                |                        |      |           |         |      |                    |                |      |                   |              |    |       |                                                |    |                                                                              |                                                                                                                                                                                                                                                                                                                                                                                                                                                                                                                                                                                                                                                                                                                                                                                                                                                                                                                                                                                                                                                                                                                                                                                                                                                                                                                                                                                                                                                                                                                                                                                                                                                                                                                                                                                                                                                                                                                     |      |                                                                    |     |                                                                                                                                                                                                                                                                                                              |      |                                                                                                                                                                                                                                                                                                                                                                                                                                                                                                                                                                                                                                                                                                                                                                                                                                                                                                                                                                                                                                                                                                                               |              |                                  |     |                              |       |              |                   |                                                              |           |              |                                                                                                                                                                                                                                                                                                                                                                                                                                                                                                                                                                                                                                                                                                                                                                         |                                                                                                                                                                      |
| What                          | A hub coordination model was advised with coordinators based in GP Practices. However, the intention was that the model going forward should be a mixture of formal referral and signposting. This would involve formal referral to larger third sector partners with paid staff who could then potentially act as caseworkers and informal signposting to a range of smaller, community level organisations and groups.                                                                                                                                                                                                                                                                                                                                                                                                                                                                                                                                                                                                                                                                                                      |                                                                                                                                                                                                                                                                                                                                                                                                                                                                                                                                                                                                                                                                                                                                                                                                                                                        |                                     |                                                                                                                                                                                                                                                               |      |                                                 |            |                                                                                |                                                                                                                                |                        |      |           |         |      |                    |                |      |                   |              |    |       |                                                |    |                                                                              |                                                                                                                                                                                                                                                                                                                                                                                                                                                                                                                                                                                                                                                                                                                                                                                                                                                                                                                                                                                                                                                                                                                                                                                                                                                                                                                                                                                                                                                                                                                                                                                                                                                                                                                                                                                                                                                                                                                     |      |                                                                    |     |                                                                                                                                                                                                                                                                                                              |      |                                                                                                                                                                                                                                                                                                                                                                                                                                                                                                                                                                                                                                                                                                                                                                                                                                                                                                                                                                                                                                                                                                                               |              |                                  |     |                              |       |              |                   |                                                              |           |              |                                                                                                                                                                                                                                                                                                                                                                                                                                                                                                                                                                                                                                                                                                                                                                         |                                                                                                                                                                      |
| Who provided                  | Hub coordinator                                                                                                                                                                                                                                                                                                                                                                                                                                                                                                                                                                                                                                                                                                                                                                                                                                                                                                                                                                                                                                                                                                               |                                                                                                                                                                                                                                                                                                                                                                                                                                                                                                                                                                                                                                                                                                                                                                                                                                                        |                                     |                                                                                                                                                                                                                                                               |      |                                                 |            |                                                                                |                                                                                                                                |                        |      |           |         |      |                    |                |      |                   |              |    |       |                                                |    |                                                                              |                                                                                                                                                                                                                                                                                                                                                                                                                                                                                                                                                                                                                                                                                                                                                                                                                                                                                                                                                                                                                                                                                                                                                                                                                                                                                                                                                                                                                                                                                                                                                                                                                                                                                                                                                                                                                                                                                                                     |      |                                                                    |     |                                                                                                                                                                                                                                                                                                              |      |                                                                                                                                                                                                                                                                                                                                                                                                                                                                                                                                                                                                                                                                                                                                                                                                                                                                                                                                                                                                                                                                                                                               |              |                                  |     |                              |       |              |                   |                                                              |           |              |                                                                                                                                                                                                                                                                                                                                                                                                                                                                                                                                                                                                                                                                                                                                                                         |                                                                                                                                                                      |
| How                           | Face-to-face                                                                                                                                                                                                                                                                                                                                                                                                                                                                                                                                                                                                                                                                                                                                                                                                                                                                                                                                                                                                                                                                                                                  |                                                                                                                                                                                                                                                                                                                                                                                                                                                                                                                                                                                                                                                                                                                                                                                                                                                        |                                     |                                                                                                                                                                                                                                                               |      |                                                 |            |                                                                                |                                                                                                                                |                        |      |           |         |      |                    |                |      |                   |              |    |       |                                                |    |                                                                              |                                                                                                                                                                                                                                                                                                                                                                                                                                                                                                                                                                                                                                                                                                                                                                                                                                                                                                                                                                                                                                                                                                                                                                                                                                                                                                                                                                                                                                                                                                                                                                                                                                                                                                                                                                                                                                                                                                                     |      |                                                                    |     |                                                                                                                                                                                                                                                                                                              |      |                                                                                                                                                                                                                                                                                                                                                                                                                                                                                                                                                                                                                                                                                                                                                                                                                                                                                                                                                                                                                                                                                                                               |              |                                  |     |                              |       |              |                   |                                                              |           |              |                                                                                                                                                                                                                                                                                                                                                                                                                                                                                                                                                                                                                                                                                                                                                                         |                                                                                                                                                                      |
| Where                         | GP surgeries                                                                                                                                                                                                                                                                                                                                                                                                                                                                                                                                                                                                                                                                                                                                                                                                                                                                                                                                                                                                                                                                                                                  |                                                                                                                                                                                                                                                                                                                                                                                                                                                                                                                                                                                                                                                                                                                                                                                                                                                        |                                     |                                                                                                                                                                                                                                                               |      |                                                 |            |                                                                                |                                                                                                                                |                        |      |           |         |      |                    |                |      |                   |              |    |       |                                                |    |                                                                              |                                                                                                                                                                                                                                                                                                                                                                                                                                                                                                                                                                                                                                                                                                                                                                                                                                                                                                                                                                                                                                                                                                                                                                                                                                                                                                                                                                                                                                                                                                                                                                                                                                                                                                                                                                                                                                                                                                                     |      |                                                                    |     |                                                                                                                                                                                                                                                                                                              |      |                                                                                                                                                                                                                                                                                                                                                                                                                                                                                                                                                                                                                                                                                                                                                                                                                                                                                                                                                                                                                                                                                                                               |              |                                  |     |                              |       |              |                   |                                                              |           |              |                                                                                                                                                                                                                                                                                                                                                                                                                                                                                                                                                                                                                                                                                                                                                                         |                                                                                                                                                                      |
| When and How Much             | Coordinators' time with a patient once referred also varies.                                                                                                                                                                                                                                                                                                                                                                                                                                                                                                                                                                                                                                                                                                                                                                                                                                                                                                                                                                                                                                                                  |                                                                                                                                                                                                                                                                                                                                                                                                                                                                                                                                                                                                                                                                                                                                                                                                                                                        |                                     |                                                                                                                                                                                                                                                               |      |                                                 |            |                                                                                |                                                                                                                                |                        |      |           |         |      |                    |                |      |                   |              |    |       |                                                |    |                                                                              |                                                                                                                                                                                                                                                                                                                                                                                                                                                                                                                                                                                                                                                                                                                                                                                                                                                                                                                                                                                                                                                                                                                                                                                                                                                                                                                                                                                                                                                                                                                                                                                                                                                                                                                                                                                                                                                                                                                     |      |                                                                    |     |                                                                                                                                                                                                                                                                                                              |      |                                                                                                                                                                                                                                                                                                                                                                                                                                                                                                                                                                                                                                                                                                                                                                                                                                                                                                                                                                                                                                                                                                                               |              |                                  |     |                              |       |              |                   |                                                              |           |              |                                                                                                                                                                                                                                                                                                                                                                                                                                                                                                                                                                                                                                                                                                                                                                         |                                                                                                                                                                      |
| Tailoring                     | Personalized                                                                                                                                                                                                                                                                                                                                                                                                                                                                                                                                                                                                                                                                                                                                                                                                                                                                                                                                                                                                                                                                                                                  |                                                                                                                                                                                                                                                                                                                                                                                                                                                                                                                                                                                                                                                                                                                                                                                                                                                        |                                     |                                                                                                                                                                                                                                                               |      |                                                 |            |                                                                                |                                                                                                                                |                        |      |           |         |      |                    |                |      |                   |              |    |       |                                                |    |                                                                              |                                                                                                                                                                                                                                                                                                                                                                                                                                                                                                                                                                                                                                                                                                                                                                                                                                                                                                                                                                                                                                                                                                                                                                                                                                                                                                                                                                                                                                                                                                                                                                                                                                                                                                                                                                                                                                                                                                                     |      |                                                                    |     |                                                                                                                                                                                                                                                                                                              |      |                                                                                                                                                                                                                                                                                                                                                                                                                                                                                                                                                                                                                                                                                                                                                                                                                                                                                                                                                                                                                                                                                                                               |              |                                  |     |                              |       |              |                   |                                                              |           |              |                                                                                                                                                                                                                                                                                                                                                                                                                                                                                                                                                                                                                                                                                                                                                                         |                                                                                                                                                                      |
| <p>Liles 2017 (77)</p>        | <p>Uncontrolled before-and-after study, mixed methods</p>                                                                                                                                                                                                                                                                                                                                                                                                                                                                                                                                                                                                                                                                                                                                                                                                                                                                                                                                                                                                                                                                     | <p><b>Inclusion criteria:</b> -</p> <p><b>Exclusion criteria:</b> -</p> <p>Baseline characteristics:</p>                                                                                                                                                                                                                                                                                                                                                                                                                                                                                                                                                                                                                                                                                                                                               | <p>Primary Care</p> <p>Country:</p> | <table border="1" data-bbox="1308 1822 2228 1915"> <tr> <td>Name</td> <td>Social Prescribing in Wessex, 8 unique projects</td> </tr> <tr> <td>Why</td> <td>Understand and address people's needs in a holistic way and to support them to</td> </tr> </table> | Name | Social Prescribing in Wessex, 8 unique projects | Why        | Understand and address people's needs in a holistic way and to support them to | <p>Patient outcomes at Baseline and after referral:</p> <ul style="list-style-type: none"> <li>- R-Outcomes (howRu)</li> </ul> | <p>Peer-Review: No</p> |      |           |         |      |                    |                |      |                   |              |    |       |                                                |    |                                                                              |                                                                                                                                                                                                                                                                                                                                                                                                                                                                                                                                                                                                                                                                                                                                                                                                                                                                                                                                                                                                                                                                                                                                                                                                                                                                                                                                                                                                                                                                                                                                                                                                                                                                                                                                                                                                                                                                                                                     |      |                                                                    |     |                                                                                                                                                                                                                                                                                                              |      |                                                                                                                                                                                                                                                                                                                                                                                                                                                                                                                                                                                                                                                                                                                                                                                                                                                                                                                                                                                                                                                                                                                               |              |                                  |     |                              |       |              |                   |                                                              |           |              |                                                                                                                                                                                                                                                                                                                                                                                                                                                                                                                                                                                                                                                                                                                                                                         |                                                                                                                                                                      |
| Name                          | Social Prescribing in Wessex, 8 unique projects                                                                                                                                                                                                                                                                                                                                                                                                                                                                                                                                                                                                                                                                                                                                                                                                                                                                                                                                                                                                                                                                               |                                                                                                                                                                                                                                                                                                                                                                                                                                                                                                                                                                                                                                                                                                                                                                                                                                                        |                                     |                                                                                                                                                                                                                                                               |      |                                                 |            |                                                                                |                                                                                                                                |                        |      |           |         |      |                    |                |      |                   |              |    |       |                                                |    |                                                                              |                                                                                                                                                                                                                                                                                                                                                                                                                                                                                                                                                                                                                                                                                                                                                                                                                                                                                                                                                                                                                                                                                                                                                                                                                                                                                                                                                                                                                                                                                                                                                                                                                                                                                                                                                                                                                                                                                                                     |      |                                                                    |     |                                                                                                                                                                                                                                                                                                              |      |                                                                                                                                                                                                                                                                                                                                                                                                                                                                                                                                                                                                                                                                                                                                                                                                                                                                                                                                                                                                                                                                                                                               |              |                                  |     |                              |       |              |                   |                                                              |           |              |                                                                                                                                                                                                                                                                                                                                                                                                                                                                                                                                                                                                                                                                                                                                                                         |                                                                                                                                                                      |
| Why                           | Understand and address people's needs in a holistic way and to support them to                                                                                                                                                                                                                                                                                                                                                                                                                                                                                                                                                                                                                                                                                                                                                                                                                                                                                                                                                                                                                                                |                                                                                                                                                                                                                                                                                                                                                                                                                                                                                                                                                                                                                                                                                                                                                                                                                                                        |                                     |                                                                                                                                                                                                                                                               |      |                                                 |            |                                                                                |                                                                                                                                |                        |      |           |         |      |                    |                |      |                   |              |    |       |                                                |    |                                                                              |                                                                                                                                                                                                                                                                                                                                                                                                                                                                                                                                                                                                                                                                                                                                                                                                                                                                                                                                                                                                                                                                                                                                                                                                                                                                                                                                                                                                                                                                                                                                                                                                                                                                                                                                                                                                                                                                                                                     |      |                                                                    |     |                                                                                                                                                                                                                                                                                                              |      |                                                                                                                                                                                                                                                                                                                                                                                                                                                                                                                                                                                                                                                                                                                                                                                                                                                                                                                                                                                                                                                                                                                               |              |                                  |     |                              |       |              |                   |                                                              |           |              |                                                                                                                                                                                                                                                                                                                                                                                                                                                                                                                                                                                                                                                                                                                                                                         |                                                                                                                                                                      |

|                    |                     |   |   |                            |                   |                                                                                                                                                                                                                                                                                                                                                                                                                                                                                                                                                                                                                                                                                                                                                                                                                                                                                                                                                                                                                                                                                                                                                                                                                                                                                                                                                                                                                                                                                                                                                                                                                                                                                                                                                                                                                                                                                                                                                                                                                                                                                                                                                                                                                                                                                                     |                                                                                          |                                                                  |
|--------------------|---------------------|---|---|----------------------------|-------------------|-----------------------------------------------------------------------------------------------------------------------------------------------------------------------------------------------------------------------------------------------------------------------------------------------------------------------------------------------------------------------------------------------------------------------------------------------------------------------------------------------------------------------------------------------------------------------------------------------------------------------------------------------------------------------------------------------------------------------------------------------------------------------------------------------------------------------------------------------------------------------------------------------------------------------------------------------------------------------------------------------------------------------------------------------------------------------------------------------------------------------------------------------------------------------------------------------------------------------------------------------------------------------------------------------------------------------------------------------------------------------------------------------------------------------------------------------------------------------------------------------------------------------------------------------------------------------------------------------------------------------------------------------------------------------------------------------------------------------------------------------------------------------------------------------------------------------------------------------------------------------------------------------------------------------------------------------------------------------------------------------------------------------------------------------------------------------------------------------------------------------------------------------------------------------------------------------------------------------------------------------------------------------------------------------------|------------------------------------------------------------------------------------------|------------------------------------------------------------------|
| Study length:<br>- | N                   |   | - | UK (Wessex, South England) |                   | take greater control of their own life, improve their health and wellbeing                                                                                                                                                                                                                                                                                                                                                                                                                                                                                                                                                                                                                                                                                                                                                                                                                                                                                                                                                                                                                                                                                                                                                                                                                                                                                                                                                                                                                                                                                                                                                                                                                                                                                                                                                                                                                                                                                                                                                                                                                                                                                                                                                                                                                          | Process of care measures:<br>- Economic evaluation<br><br>Staff outcome:<br>- R-Outcomes | Funding source:<br>-<br><br>Declarations of interest:<br>Unknown |
|                    | Age                 | - | - |                            | What              | <p>1. Older vulnerable patients, with whom they develop a holistic plan covering care coordination and connection with the local voluntary sector. Half of the patients are referred by the primary care team and half come from telephoning all older people discharged from hospital, provide a 7-day service, with one CN being on duty at the weekend,</p> <p>2. people are referred by primary care teams and other statutory and public services, provide information and coordinate care to reduce social isolation and improve planned uptake of services,</p> <p>3. focus of providing signposting and support for people aged over 70, 60% of referrals come from GPs and the remainder from a wide range of sources in primary care and other local services,</p> <p>4. provide a blend of holistic care planning and social prescribing for people aged over 70 identified as being at risk of deterioration, holistic assessment that will involve social prescribing and referral to health and care services,</p> <p>5. Most patients are referred by their GP (65%) or the locality Integrated Care Team (25%), guided conversations, complete wellbeing assessments and develop personalised support plans,</p> <p>6. recruited by members of their local community. Introductions (not referrals) can come from anywhere, professionals, community members or individuals, Support is based upon a conversation about what a 'Good Life' would like, focusing on a person's gifts, skills, interest and experiences,</p> <p>7. provide a blend of holistic care planning, medicines review and social prescribing for older people, undertake the holistic assessments; supported by a team of Assistant Practitioners who support delivery of the plan with patients and carers, majority of referrals come from GP's and most patients will be visited twice,</p> <p>8. volunteer delivered, Signposters are attached to a local General Practice and two-thirds of referrals come from primary care with the remainder being self referrals or from a wide range of other local organisations, service is aimed at people struggling to manage a long term condition, who need support following a diagnosis, are socially isolated or need help with housing and benefits</p> |                                                                                          |                                                                  |
|                    | Gender              | - | - |                            | Who provided      | <p>1. GP Federation, 5 Care Navigators, with one attached to each GP,</p> <p>2. Care Navigators,</p> <p>3. Care Navigators,</p> <p>4. Proactive Care Nurses and Care Coordinators,</p> <p>5. Coordinators,</p> <p>6. Coordinators,</p> <p>7. nurse specialist, community pharmacist,</p> <p>8. trained volunteers</p>                                                                                                                                                                                                                                                                                                                                                                                                                                                                                                                                                                                                                                                                                                                                                                                                                                                                                                                                                                                                                                                                                                                                                                                                                                                                                                                                                                                                                                                                                                                                                                                                                                                                                                                                                                                                                                                                                                                                                                               |                                                                                          |                                                                  |
|                    | Ethnicity           | - | - |                            | How               | Telephone                                                                                                                                                                                                                                                                                                                                                                                                                                                                                                                                                                                                                                                                                                                                                                                                                                                                                                                                                                                                                                                                                                                                                                                                                                                                                                                                                                                                                                                                                                                                                                                                                                                                                                                                                                                                                                                                                                                                                                                                                                                                                                                                                                                                                                                                                           |                                                                                          |                                                                  |
|                    | Living arrangement  | - | - |                            | Where             | 3+4 in GP                                                                                                                                                                                                                                                                                                                                                                                                                                                                                                                                                                                                                                                                                                                                                                                                                                                                                                                                                                                                                                                                                                                                                                                                                                                                                                                                                                                                                                                                                                                                                                                                                                                                                                                                                                                                                                                                                                                                                                                                                                                                                                                                                                                                                                                                                           |                                                                                          |                                                                  |
|                    | Employment status   | - | - |                            | When and How Much | <p>1. Patients are supported for as long as they need it, which on average is for 6.5 weeks,</p> <p>2. up to 6 visits,</p> <p>3. typically over a 2-4 week period,</p> <p>4. initial 40 minute home visit, typically two home visits,</p> <p>5. no time limit for supporting</p>                                                                                                                                                                                                                                                                                                                                                                                                                                                                                                                                                                                                                                                                                                                                                                                                                                                                                                                                                                                                                                                                                                                                                                                                                                                                                                                                                                                                                                                                                                                                                                                                                                                                                                                                                                                                                                                                                                                                                                                                                    |                                                                                          |                                                                  |
|                    | Other               | - | - |                            | Tailoring         | Personalized                                                                                                                                                                                                                                                                                                                                                                                                                                                                                                                                                                                                                                                                                                                                                                                                                                                                                                                                                                                                                                                                                                                                                                                                                                                                                                                                                                                                                                                                                                                                                                                                                                                                                                                                                                                                                                                                                                                                                                                                                                                                                                                                                                                                                                                                                        |                                                                                          |                                                                  |
|                    | Population: Unclear |   |   |                            |                   |                                                                                                                                                                                                                                                                                                                                                                                                                                                                                                                                                                                                                                                                                                                                                                                                                                                                                                                                                                                                                                                                                                                                                                                                                                                                                                                                                                                                                                                                                                                                                                                                                                                                                                                                                                                                                                                                                                                                                                                                                                                                                                                                                                                                                                                                                                     |                                                                                          |                                                                  |

|                    |                                                                                                                                                                                                                                                                                                                                                                                                                                                                                                                                                                                                                                                                                                                                         |                                                                                                                                                                                                                                                                                                                                                                                                                                                                                                                                                                                                                                                                                                                                                                                                                                                                       |   |                                     |      |     |                |            |        |          |      |           |   |   |                    |                |   |                   |              |    |       |                                   |      |                                                                              |                                                                                                                                                                                                                                                                                                                                                                                                                                                                                                                                                                                                                                                                                                                                                                                                                                                                                                                                                                                                                                                                                                                                                                                                                                                                                                                                                                                                                                                                                                                                                     |      |                            |     |                                                                                                                                                                                                               |      |                                                                                                                                                                                                                                                                                                                                                                                                                                                                                                                                                                                                                                                                                                                                         |              |                                                                |     |              |       |                                                  |                   |                                                                                              |           |              |                                                                                                                                                                                                                                                                                                                                                                                                                                                                   |                                                                                                                                                |
|--------------------|-----------------------------------------------------------------------------------------------------------------------------------------------------------------------------------------------------------------------------------------------------------------------------------------------------------------------------------------------------------------------------------------------------------------------------------------------------------------------------------------------------------------------------------------------------------------------------------------------------------------------------------------------------------------------------------------------------------------------------------------|-----------------------------------------------------------------------------------------------------------------------------------------------------------------------------------------------------------------------------------------------------------------------------------------------------------------------------------------------------------------------------------------------------------------------------------------------------------------------------------------------------------------------------------------------------------------------------------------------------------------------------------------------------------------------------------------------------------------------------------------------------------------------------------------------------------------------------------------------------------------------|---|-------------------------------------|------|-----|----------------|------------|--------|----------|------|-----------|---|---|--------------------|----------------|---|-------------------|--------------|----|-------|-----------------------------------|------|------------------------------------------------------------------------------|-----------------------------------------------------------------------------------------------------------------------------------------------------------------------------------------------------------------------------------------------------------------------------------------------------------------------------------------------------------------------------------------------------------------------------------------------------------------------------------------------------------------------------------------------------------------------------------------------------------------------------------------------------------------------------------------------------------------------------------------------------------------------------------------------------------------------------------------------------------------------------------------------------------------------------------------------------------------------------------------------------------------------------------------------------------------------------------------------------------------------------------------------------------------------------------------------------------------------------------------------------------------------------------------------------------------------------------------------------------------------------------------------------------------------------------------------------------------------------------------------------------------------------------------------------|------|----------------------------|-----|---------------------------------------------------------------------------------------------------------------------------------------------------------------------------------------------------------------|------|-----------------------------------------------------------------------------------------------------------------------------------------------------------------------------------------------------------------------------------------------------------------------------------------------------------------------------------------------------------------------------------------------------------------------------------------------------------------------------------------------------------------------------------------------------------------------------------------------------------------------------------------------------------------------------------------------------------------------------------------|--------------|----------------------------------------------------------------|-----|--------------|-------|--------------------------------------------------|-------------------|----------------------------------------------------------------------------------------------|-----------|--------------|-------------------------------------------------------------------------------------------------------------------------------------------------------------------------------------------------------------------------------------------------------------------------------------------------------------------------------------------------------------------------------------------------------------------------------------------------------------------|------------------------------------------------------------------------------------------------------------------------------------------------|
|                    |                                                                                                                                                                                                                                                                                                                                                                                                                                                                                                                                                                                                                                                                                                                                         |                                                                                                                                                                                                                                                                                                                                                                                                                                                                                                                                                                                                                                                                                                                                                                                                                                                                       |   | Intervention: Light/Medium/Holistic |      |     |                |            |        |          |      |           |   |   |                    |                |   |                   |              |    |       |                                   |      |                                                                              |                                                                                                                                                                                                                                                                                                                                                                                                                                                                                                                                                                                                                                                                                                                                                                                                                                                                                                                                                                                                                                                                                                                                                                                                                                                                                                                                                                                                                                                                                                                                                     |      |                            |     |                                                                                                                                                                                                               |      |                                                                                                                                                                                                                                                                                                                                                                                                                                                                                                                                                                                                                                                                                                                                         |              |                                                                |     |              |       |                                                  |                   |                                                                                              |           |              |                                                                                                                                                                                                                                                                                                                                                                                                                                                                   |                                                                                                                                                |
| Loftus 2017 (19)   | Uncontrolled before-and-after study<br><br>Study length:<br>9.1 months                                                                                                                                                                                                                                                                                                                                                                                                                                                                                                                                                                                                                                                                  | <p><b>Inclusion criteria:</b></p> <p>Over 65 years of age with a chronic condition (including falls, social isolation, depression/anxiety) and either evidence of polypharmacy (defined as five or more repeat medications) or viewed by the GP as a frequent GP attender</p> <p><b>Exclusion criteria:</b> -</p> <p>Baseline characteristics:</p> <table border="1"> <tr> <td>N</td> <td></td> <td>68</td> </tr> <tr> <td>Age</td> <td>Mean (SD)</td> <td>72.9 (7.3)</td> </tr> <tr> <td>Gender</td> <td>Female %</td> <td>70.6</td> </tr> <tr> <td>Ethnicity</td> <td>-</td> <td>-</td> </tr> <tr> <td>Living arrangement</td> <td>-</td> <td>-</td> </tr> <tr> <td>Employment status</td> <td>-</td> <td>-</td> </tr> <tr> <td>Other</td> <td>Diagnosis anxiety or depression %</td> <td>26.5</td> </tr> </table> <p>Population: Special (geriatric age group)</p> | N |                                     | 68   | Age | Mean (SD)      | 72.9 (7.3) | Gender | Female % | 70.6 | Ethnicity | - | - | Living arrangement | -              | - | Employment status | -            | -  | Other | Diagnosis anxiety or depression % | 26.5 | Primary Care<br><br>Country:<br>UK (Derry, Northern Ireland)                 | <table border="1"> <tr> <td>Name</td> <td>-</td> </tr> <tr> <td>Why</td> <td>Provide health and wellbeing, emotional and practical support, education and self-help groups</td> </tr> <tr> <td>What</td> <td>Referrals came from local GPs in one practice, program included social clubs, Men's Shed, counselling, arts program, falls prevention, exercises classes, crochet classes, personal development, craft classes, befriending and computer courses.</td> </tr> <tr> <td>Who provided</td> <td>Social prescribing coordinator</td> </tr> <tr> <td>How</td> <td>Telephone</td> </tr> <tr> <td>Where</td> <td>-</td> </tr> <tr> <td>When and How Much</td> <td>12 weeks</td> </tr> <tr> <td>Tailoring</td> <td>Personalized</td> </tr> </table> <p>Intervention: Holistic</p>                                                                                                                                                                                                                                                                                                                                                                                                                                                                                                                                                                                                                                                                                                                                                               | Name | -                          | Why | Provide health and wellbeing, emotional and practical support, education and self-help groups                                                                                                                 | What | Referrals came from local GPs in one practice, program included social clubs, Men's Shed, counselling, arts program, falls prevention, exercises classes, crochet classes, personal development, craft classes, befriending and computer courses.                                                                                                                                                                                                                                                                                                                                                                                                                                                                                       | Who provided | Social prescribing coordinator                                 | How | Telephone    | Where | -                                                | When and How Much | 12 weeks                                                                                     | Tailoring | Personalized | <p>Process of care measures 3 Months before and 3 months during or after referral, intention-to-treat and per-protocol analysis:</p> <ul style="list-style-type: none"> <li>- Number of patients &gt; 1 GP surgery visits</li> <li>- Number of patients &gt; 1 GP home visits</li> <li>- Number of patients &gt; 1GP telephone calls</li> <li>- Number of patients with 0 or 1 GP contact</li> <li>- Number of patients with no new repeat medications</li> </ul> | <p>Peer-Review:<br/>Yes</p> <p>Funding source:<br/>Western Health and Social Care Trust</p> <p>Declarations of interest:<br/>None declared</p> |
| N                  |                                                                                                                                                                                                                                                                                                                                                                                                                                                                                                                                                                                                                                                                                                                                         | 68                                                                                                                                                                                                                                                                                                                                                                                                                                                                                                                                                                                                                                                                                                                                                                                                                                                                    |   |                                     |      |     |                |            |        |          |      |           |   |   |                    |                |   |                   |              |    |       |                                   |      |                                                                              |                                                                                                                                                                                                                                                                                                                                                                                                                                                                                                                                                                                                                                                                                                                                                                                                                                                                                                                                                                                                                                                                                                                                                                                                                                                                                                                                                                                                                                                                                                                                                     |      |                            |     |                                                                                                                                                                                                               |      |                                                                                                                                                                                                                                                                                                                                                                                                                                                                                                                                                                                                                                                                                                                                         |              |                                                                |     |              |       |                                                  |                   |                                                                                              |           |              |                                                                                                                                                                                                                                                                                                                                                                                                                                                                   |                                                                                                                                                |
| Age                | Mean (SD)                                                                                                                                                                                                                                                                                                                                                                                                                                                                                                                                                                                                                                                                                                                               | 72.9 (7.3)                                                                                                                                                                                                                                                                                                                                                                                                                                                                                                                                                                                                                                                                                                                                                                                                                                                            |   |                                     |      |     |                |            |        |          |      |           |   |   |                    |                |   |                   |              |    |       |                                   |      |                                                                              |                                                                                                                                                                                                                                                                                                                                                                                                                                                                                                                                                                                                                                                                                                                                                                                                                                                                                                                                                                                                                                                                                                                                                                                                                                                                                                                                                                                                                                                                                                                                                     |      |                            |     |                                                                                                                                                                                                               |      |                                                                                                                                                                                                                                                                                                                                                                                                                                                                                                                                                                                                                                                                                                                                         |              |                                                                |     |              |       |                                                  |                   |                                                                                              |           |              |                                                                                                                                                                                                                                                                                                                                                                                                                                                                   |                                                                                                                                                |
| Gender             | Female %                                                                                                                                                                                                                                                                                                                                                                                                                                                                                                                                                                                                                                                                                                                                | 70.6                                                                                                                                                                                                                                                                                                                                                                                                                                                                                                                                                                                                                                                                                                                                                                                                                                                                  |   |                                     |      |     |                |            |        |          |      |           |   |   |                    |                |   |                   |              |    |       |                                   |      |                                                                              |                                                                                                                                                                                                                                                                                                                                                                                                                                                                                                                                                                                                                                                                                                                                                                                                                                                                                                                                                                                                                                                                                                                                                                                                                                                                                                                                                                                                                                                                                                                                                     |      |                            |     |                                                                                                                                                                                                               |      |                                                                                                                                                                                                                                                                                                                                                                                                                                                                                                                                                                                                                                                                                                                                         |              |                                                                |     |              |       |                                                  |                   |                                                                                              |           |              |                                                                                                                                                                                                                                                                                                                                                                                                                                                                   |                                                                                                                                                |
| Ethnicity          | -                                                                                                                                                                                                                                                                                                                                                                                                                                                                                                                                                                                                                                                                                                                                       | -                                                                                                                                                                                                                                                                                                                                                                                                                                                                                                                                                                                                                                                                                                                                                                                                                                                                     |   |                                     |      |     |                |            |        |          |      |           |   |   |                    |                |   |                   |              |    |       |                                   |      |                                                                              |                                                                                                                                                                                                                                                                                                                                                                                                                                                                                                                                                                                                                                                                                                                                                                                                                                                                                                                                                                                                                                                                                                                                                                                                                                                                                                                                                                                                                                                                                                                                                     |      |                            |     |                                                                                                                                                                                                               |      |                                                                                                                                                                                                                                                                                                                                                                                                                                                                                                                                                                                                                                                                                                                                         |              |                                                                |     |              |       |                                                  |                   |                                                                                              |           |              |                                                                                                                                                                                                                                                                                                                                                                                                                                                                   |                                                                                                                                                |
| Living arrangement | -                                                                                                                                                                                                                                                                                                                                                                                                                                                                                                                                                                                                                                                                                                                                       | -                                                                                                                                                                                                                                                                                                                                                                                                                                                                                                                                                                                                                                                                                                                                                                                                                                                                     |   |                                     |      |     |                |            |        |          |      |           |   |   |                    |                |   |                   |              |    |       |                                   |      |                                                                              |                                                                                                                                                                                                                                                                                                                                                                                                                                                                                                                                                                                                                                                                                                                                                                                                                                                                                                                                                                                                                                                                                                                                                                                                                                                                                                                                                                                                                                                                                                                                                     |      |                            |     |                                                                                                                                                                                                               |      |                                                                                                                                                                                                                                                                                                                                                                                                                                                                                                                                                                                                                                                                                                                                         |              |                                                                |     |              |       |                                                  |                   |                                                                                              |           |              |                                                                                                                                                                                                                                                                                                                                                                                                                                                                   |                                                                                                                                                |
| Employment status  | -                                                                                                                                                                                                                                                                                                                                                                                                                                                                                                                                                                                                                                                                                                                                       | -                                                                                                                                                                                                                                                                                                                                                                                                                                                                                                                                                                                                                                                                                                                                                                                                                                                                     |   |                                     |      |     |                |            |        |          |      |           |   |   |                    |                |   |                   |              |    |       |                                   |      |                                                                              |                                                                                                                                                                                                                                                                                                                                                                                                                                                                                                                                                                                                                                                                                                                                                                                                                                                                                                                                                                                                                                                                                                                                                                                                                                                                                                                                                                                                                                                                                                                                                     |      |                            |     |                                                                                                                                                                                                               |      |                                                                                                                                                                                                                                                                                                                                                                                                                                                                                                                                                                                                                                                                                                                                         |              |                                                                |     |              |       |                                                  |                   |                                                                                              |           |              |                                                                                                                                                                                                                                                                                                                                                                                                                                                                   |                                                                                                                                                |
| Other              | Diagnosis anxiety or depression %                                                                                                                                                                                                                                                                                                                                                                                                                                                                                                                                                                                                                                                                                                       | 26.5                                                                                                                                                                                                                                                                                                                                                                                                                                                                                                                                                                                                                                                                                                                                                                                                                                                                  |   |                                     |      |     |                |            |        |          |      |           |   |   |                    |                |   |                   |              |    |       |                                   |      |                                                                              |                                                                                                                                                                                                                                                                                                                                                                                                                                                                                                                                                                                                                                                                                                                                                                                                                                                                                                                                                                                                                                                                                                                                                                                                                                                                                                                                                                                                                                                                                                                                                     |      |                            |     |                                                                                                                                                                                                               |      |                                                                                                                                                                                                                                                                                                                                                                                                                                                                                                                                                                                                                                                                                                                                         |              |                                                                |     |              |       |                                                  |                   |                                                                                              |           |              |                                                                                                                                                                                                                                                                                                                                                                                                                                                                   |                                                                                                                                                |
| Name               | -                                                                                                                                                                                                                                                                                                                                                                                                                                                                                                                                                                                                                                                                                                                                       |                                                                                                                                                                                                                                                                                                                                                                                                                                                                                                                                                                                                                                                                                                                                                                                                                                                                       |   |                                     |      |     |                |            |        |          |      |           |   |   |                    |                |   |                   |              |    |       |                                   |      |                                                                              |                                                                                                                                                                                                                                                                                                                                                                                                                                                                                                                                                                                                                                                                                                                                                                                                                                                                                                                                                                                                                                                                                                                                                                                                                                                                                                                                                                                                                                                                                                                                                     |      |                            |     |                                                                                                                                                                                                               |      |                                                                                                                                                                                                                                                                                                                                                                                                                                                                                                                                                                                                                                                                                                                                         |              |                                                                |     |              |       |                                                  |                   |                                                                                              |           |              |                                                                                                                                                                                                                                                                                                                                                                                                                                                                   |                                                                                                                                                |
| Why                | Provide health and wellbeing, emotional and practical support, education and self-help groups                                                                                                                                                                                                                                                                                                                                                                                                                                                                                                                                                                                                                                           |                                                                                                                                                                                                                                                                                                                                                                                                                                                                                                                                                                                                                                                                                                                                                                                                                                                                       |   |                                     |      |     |                |            |        |          |      |           |   |   |                    |                |   |                   |              |    |       |                                   |      |                                                                              |                                                                                                                                                                                                                                                                                                                                                                                                                                                                                                                                                                                                                                                                                                                                                                                                                                                                                                                                                                                                                                                                                                                                                                                                                                                                                                                                                                                                                                                                                                                                                     |      |                            |     |                                                                                                                                                                                                               |      |                                                                                                                                                                                                                                                                                                                                                                                                                                                                                                                                                                                                                                                                                                                                         |              |                                                                |     |              |       |                                                  |                   |                                                                                              |           |              |                                                                                                                                                                                                                                                                                                                                                                                                                                                                   |                                                                                                                                                |
| What               | Referrals came from local GPs in one practice, program included social clubs, Men's Shed, counselling, arts program, falls prevention, exercises classes, crochet classes, personal development, craft classes, befriending and computer courses.                                                                                                                                                                                                                                                                                                                                                                                                                                                                                       |                                                                                                                                                                                                                                                                                                                                                                                                                                                                                                                                                                                                                                                                                                                                                                                                                                                                       |   |                                     |      |     |                |            |        |          |      |           |   |   |                    |                |   |                   |              |    |       |                                   |      |                                                                              |                                                                                                                                                                                                                                                                                                                                                                                                                                                                                                                                                                                                                                                                                                                                                                                                                                                                                                                                                                                                                                                                                                                                                                                                                                                                                                                                                                                                                                                                                                                                                     |      |                            |     |                                                                                                                                                                                                               |      |                                                                                                                                                                                                                                                                                                                                                                                                                                                                                                                                                                                                                                                                                                                                         |              |                                                                |     |              |       |                                                  |                   |                                                                                              |           |              |                                                                                                                                                                                                                                                                                                                                                                                                                                                                   |                                                                                                                                                |
| Who provided       | Social prescribing coordinator                                                                                                                                                                                                                                                                                                                                                                                                                                                                                                                                                                                                                                                                                                          |                                                                                                                                                                                                                                                                                                                                                                                                                                                                                                                                                                                                                                                                                                                                                                                                                                                                       |   |                                     |      |     |                |            |        |          |      |           |   |   |                    |                |   |                   |              |    |       |                                   |      |                                                                              |                                                                                                                                                                                                                                                                                                                                                                                                                                                                                                                                                                                                                                                                                                                                                                                                                                                                                                                                                                                                                                                                                                                                                                                                                                                                                                                                                                                                                                                                                                                                                     |      |                            |     |                                                                                                                                                                                                               |      |                                                                                                                                                                                                                                                                                                                                                                                                                                                                                                                                                                                                                                                                                                                                         |              |                                                                |     |              |       |                                                  |                   |                                                                                              |           |              |                                                                                                                                                                                                                                                                                                                                                                                                                                                                   |                                                                                                                                                |
| How                | Telephone                                                                                                                                                                                                                                                                                                                                                                                                                                                                                                                                                                                                                                                                                                                               |                                                                                                                                                                                                                                                                                                                                                                                                                                                                                                                                                                                                                                                                                                                                                                                                                                                                       |   |                                     |      |     |                |            |        |          |      |           |   |   |                    |                |   |                   |              |    |       |                                   |      |                                                                              |                                                                                                                                                                                                                                                                                                                                                                                                                                                                                                                                                                                                                                                                                                                                                                                                                                                                                                                                                                                                                                                                                                                                                                                                                                                                                                                                                                                                                                                                                                                                                     |      |                            |     |                                                                                                                                                                                                               |      |                                                                                                                                                                                                                                                                                                                                                                                                                                                                                                                                                                                                                                                                                                                                         |              |                                                                |     |              |       |                                                  |                   |                                                                                              |           |              |                                                                                                                                                                                                                                                                                                                                                                                                                                                                   |                                                                                                                                                |
| Where              | -                                                                                                                                                                                                                                                                                                                                                                                                                                                                                                                                                                                                                                                                                                                                       |                                                                                                                                                                                                                                                                                                                                                                                                                                                                                                                                                                                                                                                                                                                                                                                                                                                                       |   |                                     |      |     |                |            |        |          |      |           |   |   |                    |                |   |                   |              |    |       |                                   |      |                                                                              |                                                                                                                                                                                                                                                                                                                                                                                                                                                                                                                                                                                                                                                                                                                                                                                                                                                                                                                                                                                                                                                                                                                                                                                                                                                                                                                                                                                                                                                                                                                                                     |      |                            |     |                                                                                                                                                                                                               |      |                                                                                                                                                                                                                                                                                                                                                                                                                                                                                                                                                                                                                                                                                                                                         |              |                                                                |     |              |       |                                                  |                   |                                                                                              |           |              |                                                                                                                                                                                                                                                                                                                                                                                                                                                                   |                                                                                                                                                |
| When and How Much  | 12 weeks                                                                                                                                                                                                                                                                                                                                                                                                                                                                                                                                                                                                                                                                                                                                |                                                                                                                                                                                                                                                                                                                                                                                                                                                                                                                                                                                                                                                                                                                                                                                                                                                                       |   |                                     |      |     |                |            |        |          |      |           |   |   |                    |                |   |                   |              |    |       |                                   |      |                                                                              |                                                                                                                                                                                                                                                                                                                                                                                                                                                                                                                                                                                                                                                                                                                                                                                                                                                                                                                                                                                                                                                                                                                                                                                                                                                                                                                                                                                                                                                                                                                                                     |      |                            |     |                                                                                                                                                                                                               |      |                                                                                                                                                                                                                                                                                                                                                                                                                                                                                                                                                                                                                                                                                                                                         |              |                                                                |     |              |       |                                                  |                   |                                                                                              |           |              |                                                                                                                                                                                                                                                                                                                                                                                                                                                                   |                                                                                                                                                |
| Tailoring          | Personalized                                                                                                                                                                                                                                                                                                                                                                                                                                                                                                                                                                                                                                                                                                                            |                                                                                                                                                                                                                                                                                                                                                                                                                                                                                                                                                                                                                                                                                                                                                                                                                                                                       |   |                                     |      |     |                |            |        |          |      |           |   |   |                    |                |   |                   |              |    |       |                                   |      |                                                                              |                                                                                                                                                                                                                                                                                                                                                                                                                                                                                                                                                                                                                                                                                                                                                                                                                                                                                                                                                                                                                                                                                                                                                                                                                                                                                                                                                                                                                                                                                                                                                     |      |                            |     |                                                                                                                                                                                                               |      |                                                                                                                                                                                                                                                                                                                                                                                                                                                                                                                                                                                                                                                                                                                                         |              |                                                                |     |              |       |                                                  |                   |                                                                                              |           |              |                                                                                                                                                                                                                                                                                                                                                                                                                                                                   |                                                                                                                                                |
| Longwill 2014 (78) | Uncontrolled before-and-after study, mixed methods<br><br>Study length:<br>-                                                                                                                                                                                                                                                                                                                                                                                                                                                                                                                                                                                                                                                            | <p><b>Inclusion criteria:</b> -</p> <p><b>Exclusion criteria:</b> -</p> <p>Baseline characteristics:</p> <table border="1"> <tr> <td>N</td> <td></td> <td>1089</td> </tr> <tr> <td>Age</td> <td>Mode age group</td> <td>41-55</td> </tr> <tr> <td>Gender</td> <td>Female %</td> <td></td> </tr> <tr> <td>Ethnicity</td> <td>-</td> <td>-</td> </tr> <tr> <td>Living arrangement</td> <td>Living Alone %</td> <td></td> </tr> <tr> <td>Employment status</td> <td>Unemployed %</td> <td>49</td> </tr> <tr> <td>Other</td> <td>-</td> <td>-</td> </tr> </table> <p>Population: Unclear</p>                                                                                                                                                                                                                                                                              | N |                                     | 1089 | Age | Mode age group | 41-55      | Gender | Female % |      | Ethnicity | - | - | Living arrangement | Living Alone % |   | Employment status | Unemployed % | 49 | Other | -                                 | -    | Primary Care<br><br>Country:<br>UK ( London Borough of Hackney, East London) | <table border="1"> <tr> <td>Name</td> <td>Hackney WellFamily service</td> </tr> <tr> <td>Why</td> <td>To promote health and social wellbeing, improve whole family wellbeing by reducing stress, improving health, providing support to individuals to end abusive relationships and improving family relationships</td> </tr> <tr> <td>What</td> <td> <p>GPs can refer to the service easily through written referrals or using the EMIS clinical information system. Provides recovery-focused and holistic interventions include a mix of individually targeted and flexible practical and emotional support:</p> <ol style="list-style-type: none"> <li>1. Advice and information (e.g. regarding housing, debt, welfare benefits, employment support</li> <li>2) Counselling for emotional problems including anxiety, depression, bereavement and relationship difficulties</li> <li>3) Promotion of leisure, social and physical activities and volunteering opportunities</li> <li>4) Signposting and referral to other services</li> <li>5) Carer support and peer support</li> </ol> </td> </tr> <tr> <td>Who provided</td> <td>Team of 5.4 w.t.e workers and 2.00 w.t.e senior practitioners.</td> </tr> <tr> <td>How</td> <td>Face-to-face</td> </tr> <tr> <td>Where</td> <td>Familiar, accessible and non-stigmatised setting</td> </tr> <tr> <td>When and How Much</td> <td>Flexible over 6-12 weeks with 6-8 sessions but duration is linked to assessed level of need.</td> </tr> <tr> <td>Tailoring</td> <td>-</td> </tr> </table> | Name | Hackney WellFamily service | Why | To promote health and social wellbeing, improve whole family wellbeing by reducing stress, improving health, providing support to individuals to end abusive relationships and improving family relationships | What | <p>GPs can refer to the service easily through written referrals or using the EMIS clinical information system. Provides recovery-focused and holistic interventions include a mix of individually targeted and flexible practical and emotional support:</p> <ol style="list-style-type: none"> <li>1. Advice and information (e.g. regarding housing, debt, welfare benefits, employment support</li> <li>2) Counselling for emotional problems including anxiety, depression, bereavement and relationship difficulties</li> <li>3) Promotion of leisure, social and physical activities and volunteering opportunities</li> <li>4) Signposting and referral to other services</li> <li>5) Carer support and peer support</li> </ol> | Who provided | Team of 5.4 w.t.e workers and 2.00 w.t.e senior practitioners. | How | Face-to-face | Where | Familiar, accessible and non-stigmatised setting | When and How Much | Flexible over 6-12 weeks with 6-8 sessions but duration is linked to assessed level of need. | Tailoring | -            | <p>Patient outcomes at Baseline and post-intervention:</p> <ul style="list-style-type: none"> <li>- Generalised anxiety disorder-7 scale</li> <li>- Patient Health Questionnaire (PHQ-9)</li> <li>- Clinical Outcomes in Routine Evaluation system (CORE10)</li> <li>- Recovery Star</li> </ul> <p>Satisfaction with service at follow-up via questionnaire.</p>                                                                                                  | <p>Peer-Review:<br/>No</p> <p>Funding source:<br/>Primary Care Trust</p> <p>Declarations of interest:<br/>Unknown</p>                          |
| N                  |                                                                                                                                                                                                                                                                                                                                                                                                                                                                                                                                                                                                                                                                                                                                         | 1089                                                                                                                                                                                                                                                                                                                                                                                                                                                                                                                                                                                                                                                                                                                                                                                                                                                                  |   |                                     |      |     |                |            |        |          |      |           |   |   |                    |                |   |                   |              |    |       |                                   |      |                                                                              |                                                                                                                                                                                                                                                                                                                                                                                                                                                                                                                                                                                                                                                                                                                                                                                                                                                                                                                                                                                                                                                                                                                                                                                                                                                                                                                                                                                                                                                                                                                                                     |      |                            |     |                                                                                                                                                                                                               |      |                                                                                                                                                                                                                                                                                                                                                                                                                                                                                                                                                                                                                                                                                                                                         |              |                                                                |     |              |       |                                                  |                   |                                                                                              |           |              |                                                                                                                                                                                                                                                                                                                                                                                                                                                                   |                                                                                                                                                |
| Age                | Mode age group                                                                                                                                                                                                                                                                                                                                                                                                                                                                                                                                                                                                                                                                                                                          | 41-55                                                                                                                                                                                                                                                                                                                                                                                                                                                                                                                                                                                                                                                                                                                                                                                                                                                                 |   |                                     |      |     |                |            |        |          |      |           |   |   |                    |                |   |                   |              |    |       |                                   |      |                                                                              |                                                                                                                                                                                                                                                                                                                                                                                                                                                                                                                                                                                                                                                                                                                                                                                                                                                                                                                                                                                                                                                                                                                                                                                                                                                                                                                                                                                                                                                                                                                                                     |      |                            |     |                                                                                                                                                                                                               |      |                                                                                                                                                                                                                                                                                                                                                                                                                                                                                                                                                                                                                                                                                                                                         |              |                                                                |     |              |       |                                                  |                   |                                                                                              |           |              |                                                                                                                                                                                                                                                                                                                                                                                                                                                                   |                                                                                                                                                |
| Gender             | Female %                                                                                                                                                                                                                                                                                                                                                                                                                                                                                                                                                                                                                                                                                                                                |                                                                                                                                                                                                                                                                                                                                                                                                                                                                                                                                                                                                                                                                                                                                                                                                                                                                       |   |                                     |      |     |                |            |        |          |      |           |   |   |                    |                |   |                   |              |    |       |                                   |      |                                                                              |                                                                                                                                                                                                                                                                                                                                                                                                                                                                                                                                                                                                                                                                                                                                                                                                                                                                                                                                                                                                                                                                                                                                                                                                                                                                                                                                                                                                                                                                                                                                                     |      |                            |     |                                                                                                                                                                                                               |      |                                                                                                                                                                                                                                                                                                                                                                                                                                                                                                                                                                                                                                                                                                                                         |              |                                                                |     |              |       |                                                  |                   |                                                                                              |           |              |                                                                                                                                                                                                                                                                                                                                                                                                                                                                   |                                                                                                                                                |
| Ethnicity          | -                                                                                                                                                                                                                                                                                                                                                                                                                                                                                                                                                                                                                                                                                                                                       | -                                                                                                                                                                                                                                                                                                                                                                                                                                                                                                                                                                                                                                                                                                                                                                                                                                                                     |   |                                     |      |     |                |            |        |          |      |           |   |   |                    |                |   |                   |              |    |       |                                   |      |                                                                              |                                                                                                                                                                                                                                                                                                                                                                                                                                                                                                                                                                                                                                                                                                                                                                                                                                                                                                                                                                                                                                                                                                                                                                                                                                                                                                                                                                                                                                                                                                                                                     |      |                            |     |                                                                                                                                                                                                               |      |                                                                                                                                                                                                                                                                                                                                                                                                                                                                                                                                                                                                                                                                                                                                         |              |                                                                |     |              |       |                                                  |                   |                                                                                              |           |              |                                                                                                                                                                                                                                                                                                                                                                                                                                                                   |                                                                                                                                                |
| Living arrangement | Living Alone %                                                                                                                                                                                                                                                                                                                                                                                                                                                                                                                                                                                                                                                                                                                          |                                                                                                                                                                                                                                                                                                                                                                                                                                                                                                                                                                                                                                                                                                                                                                                                                                                                       |   |                                     |      |     |                |            |        |          |      |           |   |   |                    |                |   |                   |              |    |       |                                   |      |                                                                              |                                                                                                                                                                                                                                                                                                                                                                                                                                                                                                                                                                                                                                                                                                                                                                                                                                                                                                                                                                                                                                                                                                                                                                                                                                                                                                                                                                                                                                                                                                                                                     |      |                            |     |                                                                                                                                                                                                               |      |                                                                                                                                                                                                                                                                                                                                                                                                                                                                                                                                                                                                                                                                                                                                         |              |                                                                |     |              |       |                                                  |                   |                                                                                              |           |              |                                                                                                                                                                                                                                                                                                                                                                                                                                                                   |                                                                                                                                                |
| Employment status  | Unemployed %                                                                                                                                                                                                                                                                                                                                                                                                                                                                                                                                                                                                                                                                                                                            | 49                                                                                                                                                                                                                                                                                                                                                                                                                                                                                                                                                                                                                                                                                                                                                                                                                                                                    |   |                                     |      |     |                |            |        |          |      |           |   |   |                    |                |   |                   |              |    |       |                                   |      |                                                                              |                                                                                                                                                                                                                                                                                                                                                                                                                                                                                                                                                                                                                                                                                                                                                                                                                                                                                                                                                                                                                                                                                                                                                                                                                                                                                                                                                                                                                                                                                                                                                     |      |                            |     |                                                                                                                                                                                                               |      |                                                                                                                                                                                                                                                                                                                                                                                                                                                                                                                                                                                                                                                                                                                                         |              |                                                                |     |              |       |                                                  |                   |                                                                                              |           |              |                                                                                                                                                                                                                                                                                                                                                                                                                                                                   |                                                                                                                                                |
| Other              | -                                                                                                                                                                                                                                                                                                                                                                                                                                                                                                                                                                                                                                                                                                                                       | -                                                                                                                                                                                                                                                                                                                                                                                                                                                                                                                                                                                                                                                                                                                                                                                                                                                                     |   |                                     |      |     |                |            |        |          |      |           |   |   |                    |                |   |                   |              |    |       |                                   |      |                                                                              |                                                                                                                                                                                                                                                                                                                                                                                                                                                                                                                                                                                                                                                                                                                                                                                                                                                                                                                                                                                                                                                                                                                                                                                                                                                                                                                                                                                                                                                                                                                                                     |      |                            |     |                                                                                                                                                                                                               |      |                                                                                                                                                                                                                                                                                                                                                                                                                                                                                                                                                                                                                                                                                                                                         |              |                                                                |     |              |       |                                                  |                   |                                                                                              |           |              |                                                                                                                                                                                                                                                                                                                                                                                                                                                                   |                                                                                                                                                |
| Name               | Hackney WellFamily service                                                                                                                                                                                                                                                                                                                                                                                                                                                                                                                                                                                                                                                                                                              |                                                                                                                                                                                                                                                                                                                                                                                                                                                                                                                                                                                                                                                                                                                                                                                                                                                                       |   |                                     |      |     |                |            |        |          |      |           |   |   |                    |                |   |                   |              |    |       |                                   |      |                                                                              |                                                                                                                                                                                                                                                                                                                                                                                                                                                                                                                                                                                                                                                                                                                                                                                                                                                                                                                                                                                                                                                                                                                                                                                                                                                                                                                                                                                                                                                                                                                                                     |      |                            |     |                                                                                                                                                                                                               |      |                                                                                                                                                                                                                                                                                                                                                                                                                                                                                                                                                                                                                                                                                                                                         |              |                                                                |     |              |       |                                                  |                   |                                                                                              |           |              |                                                                                                                                                                                                                                                                                                                                                                                                                                                                   |                                                                                                                                                |
| Why                | To promote health and social wellbeing, improve whole family wellbeing by reducing stress, improving health, providing support to individuals to end abusive relationships and improving family relationships                                                                                                                                                                                                                                                                                                                                                                                                                                                                                                                           |                                                                                                                                                                                                                                                                                                                                                                                                                                                                                                                                                                                                                                                                                                                                                                                                                                                                       |   |                                     |      |     |                |            |        |          |      |           |   |   |                    |                |   |                   |              |    |       |                                   |      |                                                                              |                                                                                                                                                                                                                                                                                                                                                                                                                                                                                                                                                                                                                                                                                                                                                                                                                                                                                                                                                                                                                                                                                                                                                                                                                                                                                                                                                                                                                                                                                                                                                     |      |                            |     |                                                                                                                                                                                                               |      |                                                                                                                                                                                                                                                                                                                                                                                                                                                                                                                                                                                                                                                                                                                                         |              |                                                                |     |              |       |                                                  |                   |                                                                                              |           |              |                                                                                                                                                                                                                                                                                                                                                                                                                                                                   |                                                                                                                                                |
| What               | <p>GPs can refer to the service easily through written referrals or using the EMIS clinical information system. Provides recovery-focused and holistic interventions include a mix of individually targeted and flexible practical and emotional support:</p> <ol style="list-style-type: none"> <li>1. Advice and information (e.g. regarding housing, debt, welfare benefits, employment support</li> <li>2) Counselling for emotional problems including anxiety, depression, bereavement and relationship difficulties</li> <li>3) Promotion of leisure, social and physical activities and volunteering opportunities</li> <li>4) Signposting and referral to other services</li> <li>5) Carer support and peer support</li> </ol> |                                                                                                                                                                                                                                                                                                                                                                                                                                                                                                                                                                                                                                                                                                                                                                                                                                                                       |   |                                     |      |     |                |            |        |          |      |           |   |   |                    |                |   |                   |              |    |       |                                   |      |                                                                              |                                                                                                                                                                                                                                                                                                                                                                                                                                                                                                                                                                                                                                                                                                                                                                                                                                                                                                                                                                                                                                                                                                                                                                                                                                                                                                                                                                                                                                                                                                                                                     |      |                            |     |                                                                                                                                                                                                               |      |                                                                                                                                                                                                                                                                                                                                                                                                                                                                                                                                                                                                                                                                                                                                         |              |                                                                |     |              |       |                                                  |                   |                                                                                              |           |              |                                                                                                                                                                                                                                                                                                                                                                                                                                                                   |                                                                                                                                                |
| Who provided       | Team of 5.4 w.t.e workers and 2.00 w.t.e senior practitioners.                                                                                                                                                                                                                                                                                                                                                                                                                                                                                                                                                                                                                                                                          |                                                                                                                                                                                                                                                                                                                                                                                                                                                                                                                                                                                                                                                                                                                                                                                                                                                                       |   |                                     |      |     |                |            |        |          |      |           |   |   |                    |                |   |                   |              |    |       |                                   |      |                                                                              |                                                                                                                                                                                                                                                                                                                                                                                                                                                                                                                                                                                                                                                                                                                                                                                                                                                                                                                                                                                                                                                                                                                                                                                                                                                                                                                                                                                                                                                                                                                                                     |      |                            |     |                                                                                                                                                                                                               |      |                                                                                                                                                                                                                                                                                                                                                                                                                                                                                                                                                                                                                                                                                                                                         |              |                                                                |     |              |       |                                                  |                   |                                                                                              |           |              |                                                                                                                                                                                                                                                                                                                                                                                                                                                                   |                                                                                                                                                |
| How                | Face-to-face                                                                                                                                                                                                                                                                                                                                                                                                                                                                                                                                                                                                                                                                                                                            |                                                                                                                                                                                                                                                                                                                                                                                                                                                                                                                                                                                                                                                                                                                                                                                                                                                                       |   |                                     |      |     |                |            |        |          |      |           |   |   |                    |                |   |                   |              |    |       |                                   |      |                                                                              |                                                                                                                                                                                                                                                                                                                                                                                                                                                                                                                                                                                                                                                                                                                                                                                                                                                                                                                                                                                                                                                                                                                                                                                                                                                                                                                                                                                                                                                                                                                                                     |      |                            |     |                                                                                                                                                                                                               |      |                                                                                                                                                                                                                                                                                                                                                                                                                                                                                                                                                                                                                                                                                                                                         |              |                                                                |     |              |       |                                                  |                   |                                                                                              |           |              |                                                                                                                                                                                                                                                                                                                                                                                                                                                                   |                                                                                                                                                |
| Where              | Familiar, accessible and non-stigmatised setting                                                                                                                                                                                                                                                                                                                                                                                                                                                                                                                                                                                                                                                                                        |                                                                                                                                                                                                                                                                                                                                                                                                                                                                                                                                                                                                                                                                                                                                                                                                                                                                       |   |                                     |      |     |                |            |        |          |      |           |   |   |                    |                |   |                   |              |    |       |                                   |      |                                                                              |                                                                                                                                                                                                                                                                                                                                                                                                                                                                                                                                                                                                                                                                                                                                                                                                                                                                                                                                                                                                                                                                                                                                                                                                                                                                                                                                                                                                                                                                                                                                                     |      |                            |     |                                                                                                                                                                                                               |      |                                                                                                                                                                                                                                                                                                                                                                                                                                                                                                                                                                                                                                                                                                                                         |              |                                                                |     |              |       |                                                  |                   |                                                                                              |           |              |                                                                                                                                                                                                                                                                                                                                                                                                                                                                   |                                                                                                                                                |
| When and How Much  | Flexible over 6-12 weeks with 6-8 sessions but duration is linked to assessed level of need.                                                                                                                                                                                                                                                                                                                                                                                                                                                                                                                                                                                                                                            |                                                                                                                                                                                                                                                                                                                                                                                                                                                                                                                                                                                                                                                                                                                                                                                                                                                                       |   |                                     |      |     |                |            |        |          |      |           |   |   |                    |                |   |                   |              |    |       |                                   |      |                                                                              |                                                                                                                                                                                                                                                                                                                                                                                                                                                                                                                                                                                                                                                                                                                                                                                                                                                                                                                                                                                                                                                                                                                                                                                                                                                                                                                                                                                                                                                                                                                                                     |      |                            |     |                                                                                                                                                                                                               |      |                                                                                                                                                                                                                                                                                                                                                                                                                                                                                                                                                                                                                                                                                                                                         |              |                                                                |     |              |       |                                                  |                   |                                                                                              |           |              |                                                                                                                                                                                                                                                                                                                                                                                                                                                                   |                                                                                                                                                |
| Tailoring          | -                                                                                                                                                                                                                                                                                                                                                                                                                                                                                                                                                                                                                                                                                                                                       |                                                                                                                                                                                                                                                                                                                                                                                                                                                                                                                                                                                                                                                                                                                                                                                                                                                                       |   |                                     |      |     |                |            |        |          |      |           |   |   |                    |                |   |                   |              |    |       |                                   |      |                                                                              |                                                                                                                                                                                                                                                                                                                                                                                                                                                                                                                                                                                                                                                                                                                                                                                                                                                                                                                                                                                                                                                                                                                                                                                                                                                                                                                                                                                                                                                                                                                                                     |      |                            |     |                                                                                                                                                                                                               |      |                                                                                                                                                                                                                                                                                                                                                                                                                                                                                                                                                                                                                                                                                                                                         |              |                                                                |     |              |       |                                                  |                   |                                                                                              |           |              |                                                                                                                                                                                                                                                                                                                                                                                                                                                                   |                                                                                                                                                |

|                     |                                                                                                                                                                                                                                                                                                                                                                                                                                                                                                                                                                                                                                                                                                                    |                                                                                                                                                                                                                                                                                                                                                                                                                                                                                                                                                                                                                                                                                                                                                                                                                                                                                                                                                                                                                 |              |                        |                                                                |                                  |              |             |        |          |    |           |                 |    |                    |   |   |                   |              |    |       |                                                                |    |                                                                                         |                                                                                                                                                                                                                                                                                                                                                                                                                                                                                                                                                                                                                                                                                                                                                                                                                                                                                                                                                                                                                                                                                                                                                                                                                                                                                                                                                                                                                                                                                                                                                                                                                                                  |      |                                          |     |                                                                                                                                                                                  |      |                                                                                                                                                                                                                                                                                                                                                                                                                                                                                                                                                                                                                                                                                                                    |              |                                                                                                                                   |     |              |       |                                                                     |                   |                                                                                                                                                                    |           |              |                                                                                                                                                                                                                                                                                                                                                                                                                                                                                                                                                                                                                                                                                  |                                                                                                                                                                                                                                           |
|---------------------|--------------------------------------------------------------------------------------------------------------------------------------------------------------------------------------------------------------------------------------------------------------------------------------------------------------------------------------------------------------------------------------------------------------------------------------------------------------------------------------------------------------------------------------------------------------------------------------------------------------------------------------------------------------------------------------------------------------------|-----------------------------------------------------------------------------------------------------------------------------------------------------------------------------------------------------------------------------------------------------------------------------------------------------------------------------------------------------------------------------------------------------------------------------------------------------------------------------------------------------------------------------------------------------------------------------------------------------------------------------------------------------------------------------------------------------------------------------------------------------------------------------------------------------------------------------------------------------------------------------------------------------------------------------------------------------------------------------------------------------------------|--------------|------------------------|----------------------------------------------------------------|----------------------------------|--------------|-------------|--------|----------|----|-----------|-----------------|----|--------------------|---|---|-------------------|--------------|----|-------|----------------------------------------------------------------|----|-----------------------------------------------------------------------------------------|--------------------------------------------------------------------------------------------------------------------------------------------------------------------------------------------------------------------------------------------------------------------------------------------------------------------------------------------------------------------------------------------------------------------------------------------------------------------------------------------------------------------------------------------------------------------------------------------------------------------------------------------------------------------------------------------------------------------------------------------------------------------------------------------------------------------------------------------------------------------------------------------------------------------------------------------------------------------------------------------------------------------------------------------------------------------------------------------------------------------------------------------------------------------------------------------------------------------------------------------------------------------------------------------------------------------------------------------------------------------------------------------------------------------------------------------------------------------------------------------------------------------------------------------------------------------------------------------------------------------------------------------------|------|------------------------------------------|-----|----------------------------------------------------------------------------------------------------------------------------------------------------------------------------------|------|--------------------------------------------------------------------------------------------------------------------------------------------------------------------------------------------------------------------------------------------------------------------------------------------------------------------------------------------------------------------------------------------------------------------------------------------------------------------------------------------------------------------------------------------------------------------------------------------------------------------------------------------------------------------------------------------------------------------|--------------|-----------------------------------------------------------------------------------------------------------------------------------|-----|--------------|-------|---------------------------------------------------------------------|-------------------|--------------------------------------------------------------------------------------------------------------------------------------------------------------------|-----------|--------------|----------------------------------------------------------------------------------------------------------------------------------------------------------------------------------------------------------------------------------------------------------------------------------------------------------------------------------------------------------------------------------------------------------------------------------------------------------------------------------------------------------------------------------------------------------------------------------------------------------------------------------------------------------------------------------|-------------------------------------------------------------------------------------------------------------------------------------------------------------------------------------------------------------------------------------------|
|                     |                                                                                                                                                                                                                                                                                                                                                                                                                                                                                                                                                                                                                                                                                                                    |                                                                                                                                                                                                                                                                                                                                                                                                                                                                                                                                                                                                                                                                                                                                                                                                                                                                                                                                                                                                                 |              | Intervention: Holistic |                                                                |                                  |              |             |        |          |    |           |                 |    |                    |   |   |                   |              |    |       |                                                                |    |                                                                                         |                                                                                                                                                                                                                                                                                                                                                                                                                                                                                                                                                                                                                                                                                                                                                                                                                                                                                                                                                                                                                                                                                                                                                                                                                                                                                                                                                                                                                                                                                                                                                                                                                                                  |      |                                          |     |                                                                                                                                                                                  |      |                                                                                                                                                                                                                                                                                                                                                                                                                                                                                                                                                                                                                                                                                                                    |              |                                                                                                                                   |     |              |       |                                                                     |                   |                                                                                                                                                                    |           |              |                                                                                                                                                                                                                                                                                                                                                                                                                                                                                                                                                                                                                                                                                  |                                                                                                                                                                                                                                           |
| Massie 2019 (79)    | Uncontrolled before-and-after study, mixed methods<br><br>Study length: 20.5 months                                                                                                                                                                                                                                                                                                                                                                                                                                                                                                                                                                                                                                | <p><b>Inclusion criteria:</b> -</p> <p><b>Exclusion criteria:</b> -</p> <p>Baseline characteristics:</p> <table border="1"> <tr> <td>N</td> <td></td> <td>676</td> </tr> <tr> <td>Age</td> <td>Mean (SD)</td> <td>66.4 (18.6)</td> </tr> <tr> <td>Gender</td> <td>Female %</td> <td>64</td> </tr> <tr> <td>Ethnicity</td> <td>White British %</td> <td>68</td> </tr> <tr> <td>Living arrangement</td> <td>-</td> <td>-</td> </tr> <tr> <td>Employment status</td> <td>Retired %</td> <td>67</td> </tr> <tr> <td>Other</td> <td>Referral reason reduction in social isolation and loneliness %</td> <td>35</td> </tr> </table> <p>Population: Unclear</p>                                                                                                                                                                                                                                                                                                                                                        | N            |                        | 676                                                            | Age                              | Mean (SD)    | 66.4 (18.6) | Gender | Female % | 64 | Ethnicity | White British % | 68 | Living arrangement | - | - | Employment status | Retired %    | 67 | Other | Referral reason reduction in social isolation and loneliness % | 35 | Primary Care<br><br>Country: UK (Wolverhampton, West Midlands, Western-central England) | <table border="1"> <tr> <td>Name</td> <td>Wolverhampton Social Prescribing Service</td> </tr> <tr> <td>Why</td> <td>The service aims to help people with non-clinical needs access a wide variety of services and activities provided by voluntary and statutory organisations and community groups.</td> </tr> <tr> <td>What</td> <td>Upon receiving a referral, link workers make contact with the patient within three days, to introduce themselves and the service, and arrange a face-to-face meeting within 10 days. From these conversations the link worker will identify the issues and co-design a solution with the service user. This may include the link worker accompanying an individual to the first session of a group activity and follow up phone calls to check on progress. The link worker makes a judgement as to when the service user is ready to exit the social prescribing service – this can vary dependent upon the support required, and in some instances are open for longer due to complex lives and multiple issues.</td> </tr> <tr> <td>Who provided</td> <td>Three link workers and a 0.5 WTE Project Manager to oversee the implementation of the pilot supported by a 0.5 WTE Administrator.</td> </tr> <tr> <td>How</td> <td>Face-to-face</td> </tr> <tr> <td>Where</td> <td>-</td> </tr> <tr> <td>When and How Much</td> <td>The link worker makes a judgement as to when the service user is ready to exit the social prescribing service – this can vary dependent upon the support required.</td> </tr> <tr> <td>Tailoring</td> <td>Personalized</td> </tr> </table> <p>Intervention: Holistic</p> | Name | Wolverhampton Social Prescribing Service | Why | The service aims to help people with non-clinical needs access a wide variety of services and activities provided by voluntary and statutory organisations and community groups. | What | Upon receiving a referral, link workers make contact with the patient within three days, to introduce themselves and the service, and arrange a face-to-face meeting within 10 days. From these conversations the link worker will identify the issues and co-design a solution with the service user. This may include the link worker accompanying an individual to the first session of a group activity and follow up phone calls to check on progress. The link worker makes a judgement as to when the service user is ready to exit the social prescribing service – this can vary dependent upon the support required, and in some instances are open for longer due to complex lives and multiple issues. | Who provided | Three link workers and a 0.5 WTE Project Manager to oversee the implementation of the pilot supported by a 0.5 WTE Administrator. | How | Face-to-face | Where | -                                                                   | When and How Much | The link worker makes a judgement as to when the service user is ready to exit the social prescribing service – this can vary dependent upon the support required. | Tailoring | Personalized | <p>Patient outcomes at baseline and after 1-7 months:</p> <ul style="list-style-type: none"> <li>- Office for National Statistics Wellbeing Scale</li> <li>- De Jong Gierveld Loneliness scale</li> </ul> <p>Process of care measures 6 months before and after referral to social prescribing:</p> <ul style="list-style-type: none"> <li>- GP visits</li> <li>- Nurse visits</li> <li>- Primary care</li> <li>- A&amp;E attendance</li> <li>- Urgent care visits</li> <li>- Emergency admissions</li> <li>- Hospital bed days</li> <li>- Secondary care</li> </ul> <p>Economic evaluation:</p> <ul style="list-style-type: none"> <li>- Social Return on Investment</li> </ul> | <p>Peer-Review: No</p> <p>Funding source: Wolverhampton Clinical Commissioning Group (CCG)</p> <p>Declarations of interest: Unknown</p>                                                                                                   |
| N                   |                                                                                                                                                                                                                                                                                                                                                                                                                                                                                                                                                                                                                                                                                                                    | 676                                                                                                                                                                                                                                                                                                                                                                                                                                                                                                                                                                                                                                                                                                                                                                                                                                                                                                                                                                                                             |              |                        |                                                                |                                  |              |             |        |          |    |           |                 |    |                    |   |   |                   |              |    |       |                                                                |    |                                                                                         |                                                                                                                                                                                                                                                                                                                                                                                                                                                                                                                                                                                                                                                                                                                                                                                                                                                                                                                                                                                                                                                                                                                                                                                                                                                                                                                                                                                                                                                                                                                                                                                                                                                  |      |                                          |     |                                                                                                                                                                                  |      |                                                                                                                                                                                                                                                                                                                                                                                                                                                                                                                                                                                                                                                                                                                    |              |                                                                                                                                   |     |              |       |                                                                     |                   |                                                                                                                                                                    |           |              |                                                                                                                                                                                                                                                                                                                                                                                                                                                                                                                                                                                                                                                                                  |                                                                                                                                                                                                                                           |
| Age                 | Mean (SD)                                                                                                                                                                                                                                                                                                                                                                                                                                                                                                                                                                                                                                                                                                          | 66.4 (18.6)                                                                                                                                                                                                                                                                                                                                                                                                                                                                                                                                                                                                                                                                                                                                                                                                                                                                                                                                                                                                     |              |                        |                                                                |                                  |              |             |        |          |    |           |                 |    |                    |   |   |                   |              |    |       |                                                                |    |                                                                                         |                                                                                                                                                                                                                                                                                                                                                                                                                                                                                                                                                                                                                                                                                                                                                                                                                                                                                                                                                                                                                                                                                                                                                                                                                                                                                                                                                                                                                                                                                                                                                                                                                                                  |      |                                          |     |                                                                                                                                                                                  |      |                                                                                                                                                                                                                                                                                                                                                                                                                                                                                                                                                                                                                                                                                                                    |              |                                                                                                                                   |     |              |       |                                                                     |                   |                                                                                                                                                                    |           |              |                                                                                                                                                                                                                                                                                                                                                                                                                                                                                                                                                                                                                                                                                  |                                                                                                                                                                                                                                           |
| Gender              | Female %                                                                                                                                                                                                                                                                                                                                                                                                                                                                                                                                                                                                                                                                                                           | 64                                                                                                                                                                                                                                                                                                                                                                                                                                                                                                                                                                                                                                                                                                                                                                                                                                                                                                                                                                                                              |              |                        |                                                                |                                  |              |             |        |          |    |           |                 |    |                    |   |   |                   |              |    |       |                                                                |    |                                                                                         |                                                                                                                                                                                                                                                                                                                                                                                                                                                                                                                                                                                                                                                                                                                                                                                                                                                                                                                                                                                                                                                                                                                                                                                                                                                                                                                                                                                                                                                                                                                                                                                                                                                  |      |                                          |     |                                                                                                                                                                                  |      |                                                                                                                                                                                                                                                                                                                                                                                                                                                                                                                                                                                                                                                                                                                    |              |                                                                                                                                   |     |              |       |                                                                     |                   |                                                                                                                                                                    |           |              |                                                                                                                                                                                                                                                                                                                                                                                                                                                                                                                                                                                                                                                                                  |                                                                                                                                                                                                                                           |
| Ethnicity           | White British %                                                                                                                                                                                                                                                                                                                                                                                                                                                                                                                                                                                                                                                                                                    | 68                                                                                                                                                                                                                                                                                                                                                                                                                                                                                                                                                                                                                                                                                                                                                                                                                                                                                                                                                                                                              |              |                        |                                                                |                                  |              |             |        |          |    |           |                 |    |                    |   |   |                   |              |    |       |                                                                |    |                                                                                         |                                                                                                                                                                                                                                                                                                                                                                                                                                                                                                                                                                                                                                                                                                                                                                                                                                                                                                                                                                                                                                                                                                                                                                                                                                                                                                                                                                                                                                                                                                                                                                                                                                                  |      |                                          |     |                                                                                                                                                                                  |      |                                                                                                                                                                                                                                                                                                                                                                                                                                                                                                                                                                                                                                                                                                                    |              |                                                                                                                                   |     |              |       |                                                                     |                   |                                                                                                                                                                    |           |              |                                                                                                                                                                                                                                                                                                                                                                                                                                                                                                                                                                                                                                                                                  |                                                                                                                                                                                                                                           |
| Living arrangement  | -                                                                                                                                                                                                                                                                                                                                                                                                                                                                                                                                                                                                                                                                                                                  | -                                                                                                                                                                                                                                                                                                                                                                                                                                                                                                                                                                                                                                                                                                                                                                                                                                                                                                                                                                                                               |              |                        |                                                                |                                  |              |             |        |          |    |           |                 |    |                    |   |   |                   |              |    |       |                                                                |    |                                                                                         |                                                                                                                                                                                                                                                                                                                                                                                                                                                                                                                                                                                                                                                                                                                                                                                                                                                                                                                                                                                                                                                                                                                                                                                                                                                                                                                                                                                                                                                                                                                                                                                                                                                  |      |                                          |     |                                                                                                                                                                                  |      |                                                                                                                                                                                                                                                                                                                                                                                                                                                                                                                                                                                                                                                                                                                    |              |                                                                                                                                   |     |              |       |                                                                     |                   |                                                                                                                                                                    |           |              |                                                                                                                                                                                                                                                                                                                                                                                                                                                                                                                                                                                                                                                                                  |                                                                                                                                                                                                                                           |
| Employment status   | Retired %                                                                                                                                                                                                                                                                                                                                                                                                                                                                                                                                                                                                                                                                                                          | 67                                                                                                                                                                                                                                                                                                                                                                                                                                                                                                                                                                                                                                                                                                                                                                                                                                                                                                                                                                                                              |              |                        |                                                                |                                  |              |             |        |          |    |           |                 |    |                    |   |   |                   |              |    |       |                                                                |    |                                                                                         |                                                                                                                                                                                                                                                                                                                                                                                                                                                                                                                                                                                                                                                                                                                                                                                                                                                                                                                                                                                                                                                                                                                                                                                                                                                                                                                                                                                                                                                                                                                                                                                                                                                  |      |                                          |     |                                                                                                                                                                                  |      |                                                                                                                                                                                                                                                                                                                                                                                                                                                                                                                                                                                                                                                                                                                    |              |                                                                                                                                   |     |              |       |                                                                     |                   |                                                                                                                                                                    |           |              |                                                                                                                                                                                                                                                                                                                                                                                                                                                                                                                                                                                                                                                                                  |                                                                                                                                                                                                                                           |
| Other               | Referral reason reduction in social isolation and loneliness %                                                                                                                                                                                                                                                                                                                                                                                                                                                                                                                                                                                                                                                     | 35                                                                                                                                                                                                                                                                                                                                                                                                                                                                                                                                                                                                                                                                                                                                                                                                                                                                                                                                                                                                              |              |                        |                                                                |                                  |              |             |        |          |    |           |                 |    |                    |   |   |                   |              |    |       |                                                                |    |                                                                                         |                                                                                                                                                                                                                                                                                                                                                                                                                                                                                                                                                                                                                                                                                                                                                                                                                                                                                                                                                                                                                                                                                                                                                                                                                                                                                                                                                                                                                                                                                                                                                                                                                                                  |      |                                          |     |                                                                                                                                                                                  |      |                                                                                                                                                                                                                                                                                                                                                                                                                                                                                                                                                                                                                                                                                                                    |              |                                                                                                                                   |     |              |       |                                                                     |                   |                                                                                                                                                                    |           |              |                                                                                                                                                                                                                                                                                                                                                                                                                                                                                                                                                                                                                                                                                  |                                                                                                                                                                                                                                           |
| Name                | Wolverhampton Social Prescribing Service                                                                                                                                                                                                                                                                                                                                                                                                                                                                                                                                                                                                                                                                           |                                                                                                                                                                                                                                                                                                                                                                                                                                                                                                                                                                                                                                                                                                                                                                                                                                                                                                                                                                                                                 |              |                        |                                                                |                                  |              |             |        |          |    |           |                 |    |                    |   |   |                   |              |    |       |                                                                |    |                                                                                         |                                                                                                                                                                                                                                                                                                                                                                                                                                                                                                                                                                                                                                                                                                                                                                                                                                                                                                                                                                                                                                                                                                                                                                                                                                                                                                                                                                                                                                                                                                                                                                                                                                                  |      |                                          |     |                                                                                                                                                                                  |      |                                                                                                                                                                                                                                                                                                                                                                                                                                                                                                                                                                                                                                                                                                                    |              |                                                                                                                                   |     |              |       |                                                                     |                   |                                                                                                                                                                    |           |              |                                                                                                                                                                                                                                                                                                                                                                                                                                                                                                                                                                                                                                                                                  |                                                                                                                                                                                                                                           |
| Why                 | The service aims to help people with non-clinical needs access a wide variety of services and activities provided by voluntary and statutory organisations and community groups.                                                                                                                                                                                                                                                                                                                                                                                                                                                                                                                                   |                                                                                                                                                                                                                                                                                                                                                                                                                                                                                                                                                                                                                                                                                                                                                                                                                                                                                                                                                                                                                 |              |                        |                                                                |                                  |              |             |        |          |    |           |                 |    |                    |   |   |                   |              |    |       |                                                                |    |                                                                                         |                                                                                                                                                                                                                                                                                                                                                                                                                                                                                                                                                                                                                                                                                                                                                                                                                                                                                                                                                                                                                                                                                                                                                                                                                                                                                                                                                                                                                                                                                                                                                                                                                                                  |      |                                          |     |                                                                                                                                                                                  |      |                                                                                                                                                                                                                                                                                                                                                                                                                                                                                                                                                                                                                                                                                                                    |              |                                                                                                                                   |     |              |       |                                                                     |                   |                                                                                                                                                                    |           |              |                                                                                                                                                                                                                                                                                                                                                                                                                                                                                                                                                                                                                                                                                  |                                                                                                                                                                                                                                           |
| What                | Upon receiving a referral, link workers make contact with the patient within three days, to introduce themselves and the service, and arrange a face-to-face meeting within 10 days. From these conversations the link worker will identify the issues and co-design a solution with the service user. This may include the link worker accompanying an individual to the first session of a group activity and follow up phone calls to check on progress. The link worker makes a judgement as to when the service user is ready to exit the social prescribing service – this can vary dependent upon the support required, and in some instances are open for longer due to complex lives and multiple issues. |                                                                                                                                                                                                                                                                                                                                                                                                                                                                                                                                                                                                                                                                                                                                                                                                                                                                                                                                                                                                                 |              |                        |                                                                |                                  |              |             |        |          |    |           |                 |    |                    |   |   |                   |              |    |       |                                                                |    |                                                                                         |                                                                                                                                                                                                                                                                                                                                                                                                                                                                                                                                                                                                                                                                                                                                                                                                                                                                                                                                                                                                                                                                                                                                                                                                                                                                                                                                                                                                                                                                                                                                                                                                                                                  |      |                                          |     |                                                                                                                                                                                  |      |                                                                                                                                                                                                                                                                                                                                                                                                                                                                                                                                                                                                                                                                                                                    |              |                                                                                                                                   |     |              |       |                                                                     |                   |                                                                                                                                                                    |           |              |                                                                                                                                                                                                                                                                                                                                                                                                                                                                                                                                                                                                                                                                                  |                                                                                                                                                                                                                                           |
| Who provided        | Three link workers and a 0.5 WTE Project Manager to oversee the implementation of the pilot supported by a 0.5 WTE Administrator.                                                                                                                                                                                                                                                                                                                                                                                                                                                                                                                                                                                  |                                                                                                                                                                                                                                                                                                                                                                                                                                                                                                                                                                                                                                                                                                                                                                                                                                                                                                                                                                                                                 |              |                        |                                                                |                                  |              |             |        |          |    |           |                 |    |                    |   |   |                   |              |    |       |                                                                |    |                                                                                         |                                                                                                                                                                                                                                                                                                                                                                                                                                                                                                                                                                                                                                                                                                                                                                                                                                                                                                                                                                                                                                                                                                                                                                                                                                                                                                                                                                                                                                                                                                                                                                                                                                                  |      |                                          |     |                                                                                                                                                                                  |      |                                                                                                                                                                                                                                                                                                                                                                                                                                                                                                                                                                                                                                                                                                                    |              |                                                                                                                                   |     |              |       |                                                                     |                   |                                                                                                                                                                    |           |              |                                                                                                                                                                                                                                                                                                                                                                                                                                                                                                                                                                                                                                                                                  |                                                                                                                                                                                                                                           |
| How                 | Face-to-face                                                                                                                                                                                                                                                                                                                                                                                                                                                                                                                                                                                                                                                                                                       |                                                                                                                                                                                                                                                                                                                                                                                                                                                                                                                                                                                                                                                                                                                                                                                                                                                                                                                                                                                                                 |              |                        |                                                                |                                  |              |             |        |          |    |           |                 |    |                    |   |   |                   |              |    |       |                                                                |    |                                                                                         |                                                                                                                                                                                                                                                                                                                                                                                                                                                                                                                                                                                                                                                                                                                                                                                                                                                                                                                                                                                                                                                                                                                                                                                                                                                                                                                                                                                                                                                                                                                                                                                                                                                  |      |                                          |     |                                                                                                                                                                                  |      |                                                                                                                                                                                                                                                                                                                                                                                                                                                                                                                                                                                                                                                                                                                    |              |                                                                                                                                   |     |              |       |                                                                     |                   |                                                                                                                                                                    |           |              |                                                                                                                                                                                                                                                                                                                                                                                                                                                                                                                                                                                                                                                                                  |                                                                                                                                                                                                                                           |
| Where               | -                                                                                                                                                                                                                                                                                                                                                                                                                                                                                                                                                                                                                                                                                                                  |                                                                                                                                                                                                                                                                                                                                                                                                                                                                                                                                                                                                                                                                                                                                                                                                                                                                                                                                                                                                                 |              |                        |                                                                |                                  |              |             |        |          |    |           |                 |    |                    |   |   |                   |              |    |       |                                                                |    |                                                                                         |                                                                                                                                                                                                                                                                                                                                                                                                                                                                                                                                                                                                                                                                                                                                                                                                                                                                                                                                                                                                                                                                                                                                                                                                                                                                                                                                                                                                                                                                                                                                                                                                                                                  |      |                                          |     |                                                                                                                                                                                  |      |                                                                                                                                                                                                                                                                                                                                                                                                                                                                                                                                                                                                                                                                                                                    |              |                                                                                                                                   |     |              |       |                                                                     |                   |                                                                                                                                                                    |           |              |                                                                                                                                                                                                                                                                                                                                                                                                                                                                                                                                                                                                                                                                                  |                                                                                                                                                                                                                                           |
| When and How Much   | The link worker makes a judgement as to when the service user is ready to exit the social prescribing service – this can vary dependent upon the support required.                                                                                                                                                                                                                                                                                                                                                                                                                                                                                                                                                 |                                                                                                                                                                                                                                                                                                                                                                                                                                                                                                                                                                                                                                                                                                                                                                                                                                                                                                                                                                                                                 |              |                        |                                                                |                                  |              |             |        |          |    |           |                 |    |                    |   |   |                   |              |    |       |                                                                |    |                                                                                         |                                                                                                                                                                                                                                                                                                                                                                                                                                                                                                                                                                                                                                                                                                                                                                                                                                                                                                                                                                                                                                                                                                                                                                                                                                                                                                                                                                                                                                                                                                                                                                                                                                                  |      |                                          |     |                                                                                                                                                                                  |      |                                                                                                                                                                                                                                                                                                                                                                                                                                                                                                                                                                                                                                                                                                                    |              |                                                                                                                                   |     |              |       |                                                                     |                   |                                                                                                                                                                    |           |              |                                                                                                                                                                                                                                                                                                                                                                                                                                                                                                                                                                                                                                                                                  |                                                                                                                                                                                                                                           |
| Tailoring           | Personalized                                                                                                                                                                                                                                                                                                                                                                                                                                                                                                                                                                                                                                                                                                       |                                                                                                                                                                                                                                                                                                                                                                                                                                                                                                                                                                                                                                                                                                                                                                                                                                                                                                                                                                                                                 |              |                        |                                                                |                                  |              |             |        |          |    |           |                 |    |                    |   |   |                   |              |    |       |                                                                |    |                                                                                         |                                                                                                                                                                                                                                                                                                                                                                                                                                                                                                                                                                                                                                                                                                                                                                                                                                                                                                                                                                                                                                                                                                                                                                                                                                                                                                                                                                                                                                                                                                                                                                                                                                                  |      |                                          |     |                                                                                                                                                                                  |      |                                                                                                                                                                                                                                                                                                                                                                                                                                                                                                                                                                                                                                                                                                                    |              |                                                                                                                                   |     |              |       |                                                                     |                   |                                                                                                                                                                    |           |              |                                                                                                                                                                                                                                                                                                                                                                                                                                                                                                                                                                                                                                                                                  |                                                                                                                                                                                                                                           |
| Maund 2019 (80)     | Uncontrolled before-and-after study, mixed methods<br><br>Study length: -                                                                                                                                                                                                                                                                                                                                                                                                                                                                                                                                                                                                                                          | <p><b>Inclusion criteria:</b></p> <ol style="list-style-type: none"> <li>1) Aged 18 years or older;</li> <li>2) be registered with the community mental wellbeing service;</li> <li>3) diagnosed with depression and/or anxiety (as categorised by mental health support workers);</li> <li>4) physically able to take part in the range of outdoor activities; and</li> <li>5) deemed able to provide informed consent</li> </ol> <p><b>Exclusion criteria:</b> -</p> <p>Baseline characteristics:</p> <table border="1"> <tr> <td>N</td> <td></td> <td>18</td> </tr> <tr> <td>Age</td> <td>&gt; 50 years %</td> <td>50</td> </tr> <tr> <td>Gender</td> <td>Female %</td> <td>50</td> </tr> <tr> <td>Ethnicity</td> <td>White British %</td> <td>81</td> </tr> <tr> <td>Living arrangement</td> <td>-</td> <td>-</td> </tr> <tr> <td>Employment status</td> <td>Unemployed %</td> <td>63</td> </tr> <tr> <td>Other</td> <td>-</td> <td>-</td> </tr> </table> <p>Population: Special (mental health issues)</p> | N            |                        | 18                                                             | Age                              | > 50 years % | 50          | Gender | Female % | 50 | Ethnicity | White British % | 81 | Living arrangement | - | - | Employment status | Unemployed % | 63 | Other | -                                                              | -  | Secondary Care<br><br>Country: UK (Gloucestershire, South West England)                 | <table border="1"> <tr> <td>Name</td> <td>Wetlands for Wellbeing</td> </tr> <tr> <td>Why</td> <td>To improve the mental health of individuals experiencing anxiety and/or depression through engagement with nature.</td> </tr> <tr> <td>What</td> <td>Participants were recruited through a community mental wellbeing service. This non-governmental organisation offers one-to-one and group therapy, as well as signposting individuals to suitable health promoting interventions delivered by third-party organisations. A structured six-week nature-based health intervention (NBI) consisted of a broad range of nature-focused activities that took place within a wetland site.</td> </tr> <tr> <td>Who provided</td> <td>Community mental wellbeing service: mental health support workers</td> </tr> <tr> <td>How</td> <td>Face-to-face</td> </tr> <tr> <td>Where</td> <td>Wildfowl &amp; Wetlands Trust (WWT) wetland site in Gloucestershire, UK</td> </tr> <tr> <td>When and How Much</td> <td>Participants took part in a two-hour session per week for six consecutive weeks.</td> </tr> <tr> <td>Tailoring</td> <td>-</td> </tr> </table> <p>Intervention: Medium</p>                                                                                                                                                                                                                                                                                                                                                                                                                                                         | Name | Wetlands for Wellbeing                   | Why | To improve the mental health of individuals experiencing anxiety and/or depression through engagement with nature.                                                               | What | Participants were recruited through a community mental wellbeing service. This non-governmental organisation offers one-to-one and group therapy, as well as signposting individuals to suitable health promoting interventions delivered by third-party organisations. A structured six-week nature-based health intervention (NBI) consisted of a broad range of nature-focused activities that took place within a wetland site.                                                                                                                                                                                                                                                                                | Who provided | Community mental wellbeing service: mental health support workers                                                                 | How | Face-to-face | Where | Wildfowl & Wetlands Trust (WWT) wetland site in Gloucestershire, UK | When and How Much | Participants took part in a two-hour session per week for six consecutive weeks.                                                                                   | Tailoring | -            | <p>Patient outcome at baseline and after 6 weeks:</p> <ul style="list-style-type: none"> <li>- Warwick Edinburgh Mental Wellbeing Scale</li> <li>- Generalised anxiety disorder-7 scale</li> <li>- Perceived Stress Scale</li> <li>- Positive and Negative Affect Schedule</li> </ul>                                                                                                                                                                                                                                                                                                                                                                                            | <p>Peer-Review: Yes</p> <p>Funding source: Horizon 2020 (Consolidator Grant No. 726104), Scottish Government's Rural and Environment Sciences and Analytical Services Division (RESAS)</p> <p>Declarations of interest: None declared</p> |
| N                   |                                                                                                                                                                                                                                                                                                                                                                                                                                                                                                                                                                                                                                                                                                                    | 18                                                                                                                                                                                                                                                                                                                                                                                                                                                                                                                                                                                                                                                                                                                                                                                                                                                                                                                                                                                                              |              |                        |                                                                |                                  |              |             |        |          |    |           |                 |    |                    |   |   |                   |              |    |       |                                                                |    |                                                                                         |                                                                                                                                                                                                                                                                                                                                                                                                                                                                                                                                                                                                                                                                                                                                                                                                                                                                                                                                                                                                                                                                                                                                                                                                                                                                                                                                                                                                                                                                                                                                                                                                                                                  |      |                                          |     |                                                                                                                                                                                  |      |                                                                                                                                                                                                                                                                                                                                                                                                                                                                                                                                                                                                                                                                                                                    |              |                                                                                                                                   |     |              |       |                                                                     |                   |                                                                                                                                                                    |           |              |                                                                                                                                                                                                                                                                                                                                                                                                                                                                                                                                                                                                                                                                                  |                                                                                                                                                                                                                                           |
| Age                 | > 50 years %                                                                                                                                                                                                                                                                                                                                                                                                                                                                                                                                                                                                                                                                                                       | 50                                                                                                                                                                                                                                                                                                                                                                                                                                                                                                                                                                                                                                                                                                                                                                                                                                                                                                                                                                                                              |              |                        |                                                                |                                  |              |             |        |          |    |           |                 |    |                    |   |   |                   |              |    |       |                                                                |    |                                                                                         |                                                                                                                                                                                                                                                                                                                                                                                                                                                                                                                                                                                                                                                                                                                                                                                                                                                                                                                                                                                                                                                                                                                                                                                                                                                                                                                                                                                                                                                                                                                                                                                                                                                  |      |                                          |     |                                                                                                                                                                                  |      |                                                                                                                                                                                                                                                                                                                                                                                                                                                                                                                                                                                                                                                                                                                    |              |                                                                                                                                   |     |              |       |                                                                     |                   |                                                                                                                                                                    |           |              |                                                                                                                                                                                                                                                                                                                                                                                                                                                                                                                                                                                                                                                                                  |                                                                                                                                                                                                                                           |
| Gender              | Female %                                                                                                                                                                                                                                                                                                                                                                                                                                                                                                                                                                                                                                                                                                           | 50                                                                                                                                                                                                                                                                                                                                                                                                                                                                                                                                                                                                                                                                                                                                                                                                                                                                                                                                                                                                              |              |                        |                                                                |                                  |              |             |        |          |    |           |                 |    |                    |   |   |                   |              |    |       |                                                                |    |                                                                                         |                                                                                                                                                                                                                                                                                                                                                                                                                                                                                                                                                                                                                                                                                                                                                                                                                                                                                                                                                                                                                                                                                                                                                                                                                                                                                                                                                                                                                                                                                                                                                                                                                                                  |      |                                          |     |                                                                                                                                                                                  |      |                                                                                                                                                                                                                                                                                                                                                                                                                                                                                                                                                                                                                                                                                                                    |              |                                                                                                                                   |     |              |       |                                                                     |                   |                                                                                                                                                                    |           |              |                                                                                                                                                                                                                                                                                                                                                                                                                                                                                                                                                                                                                                                                                  |                                                                                                                                                                                                                                           |
| Ethnicity           | White British %                                                                                                                                                                                                                                                                                                                                                                                                                                                                                                                                                                                                                                                                                                    | 81                                                                                                                                                                                                                                                                                                                                                                                                                                                                                                                                                                                                                                                                                                                                                                                                                                                                                                                                                                                                              |              |                        |                                                                |                                  |              |             |        |          |    |           |                 |    |                    |   |   |                   |              |    |       |                                                                |    |                                                                                         |                                                                                                                                                                                                                                                                                                                                                                                                                                                                                                                                                                                                                                                                                                                                                                                                                                                                                                                                                                                                                                                                                                                                                                                                                                                                                                                                                                                                                                                                                                                                                                                                                                                  |      |                                          |     |                                                                                                                                                                                  |      |                                                                                                                                                                                                                                                                                                                                                                                                                                                                                                                                                                                                                                                                                                                    |              |                                                                                                                                   |     |              |       |                                                                     |                   |                                                                                                                                                                    |           |              |                                                                                                                                                                                                                                                                                                                                                                                                                                                                                                                                                                                                                                                                                  |                                                                                                                                                                                                                                           |
| Living arrangement  | -                                                                                                                                                                                                                                                                                                                                                                                                                                                                                                                                                                                                                                                                                                                  | -                                                                                                                                                                                                                                                                                                                                                                                                                                                                                                                                                                                                                                                                                                                                                                                                                                                                                                                                                                                                               |              |                        |                                                                |                                  |              |             |        |          |    |           |                 |    |                    |   |   |                   |              |    |       |                                                                |    |                                                                                         |                                                                                                                                                                                                                                                                                                                                                                                                                                                                                                                                                                                                                                                                                                                                                                                                                                                                                                                                                                                                                                                                                                                                                                                                                                                                                                                                                                                                                                                                                                                                                                                                                                                  |      |                                          |     |                                                                                                                                                                                  |      |                                                                                                                                                                                                                                                                                                                                                                                                                                                                                                                                                                                                                                                                                                                    |              |                                                                                                                                   |     |              |       |                                                                     |                   |                                                                                                                                                                    |           |              |                                                                                                                                                                                                                                                                                                                                                                                                                                                                                                                                                                                                                                                                                  |                                                                                                                                                                                                                                           |
| Employment status   | Unemployed %                                                                                                                                                                                                                                                                                                                                                                                                                                                                                                                                                                                                                                                                                                       | 63                                                                                                                                                                                                                                                                                                                                                                                                                                                                                                                                                                                                                                                                                                                                                                                                                                                                                                                                                                                                              |              |                        |                                                                |                                  |              |             |        |          |    |           |                 |    |                    |   |   |                   |              |    |       |                                                                |    |                                                                                         |                                                                                                                                                                                                                                                                                                                                                                                                                                                                                                                                                                                                                                                                                                                                                                                                                                                                                                                                                                                                                                                                                                                                                                                                                                                                                                                                                                                                                                                                                                                                                                                                                                                  |      |                                          |     |                                                                                                                                                                                  |      |                                                                                                                                                                                                                                                                                                                                                                                                                                                                                                                                                                                                                                                                                                                    |              |                                                                                                                                   |     |              |       |                                                                     |                   |                                                                                                                                                                    |           |              |                                                                                                                                                                                                                                                                                                                                                                                                                                                                                                                                                                                                                                                                                  |                                                                                                                                                                                                                                           |
| Other               | -                                                                                                                                                                                                                                                                                                                                                                                                                                                                                                                                                                                                                                                                                                                  | -                                                                                                                                                                                                                                                                                                                                                                                                                                                                                                                                                                                                                                                                                                                                                                                                                                                                                                                                                                                                               |              |                        |                                                                |                                  |              |             |        |          |    |           |                 |    |                    |   |   |                   |              |    |       |                                                                |    |                                                                                         |                                                                                                                                                                                                                                                                                                                                                                                                                                                                                                                                                                                                                                                                                                                                                                                                                                                                                                                                                                                                                                                                                                                                                                                                                                                                                                                                                                                                                                                                                                                                                                                                                                                  |      |                                          |     |                                                                                                                                                                                  |      |                                                                                                                                                                                                                                                                                                                                                                                                                                                                                                                                                                                                                                                                                                                    |              |                                                                                                                                   |     |              |       |                                                                     |                   |                                                                                                                                                                    |           |              |                                                                                                                                                                                                                                                                                                                                                                                                                                                                                                                                                                                                                                                                                  |                                                                                                                                                                                                                                           |
| Name                | Wetlands for Wellbeing                                                                                                                                                                                                                                                                                                                                                                                                                                                                                                                                                                                                                                                                                             |                                                                                                                                                                                                                                                                                                                                                                                                                                                                                                                                                                                                                                                                                                                                                                                                                                                                                                                                                                                                                 |              |                        |                                                                |                                  |              |             |        |          |    |           |                 |    |                    |   |   |                   |              |    |       |                                                                |    |                                                                                         |                                                                                                                                                                                                                                                                                                                                                                                                                                                                                                                                                                                                                                                                                                                                                                                                                                                                                                                                                                                                                                                                                                                                                                                                                                                                                                                                                                                                                                                                                                                                                                                                                                                  |      |                                          |     |                                                                                                                                                                                  |      |                                                                                                                                                                                                                                                                                                                                                                                                                                                                                                                                                                                                                                                                                                                    |              |                                                                                                                                   |     |              |       |                                                                     |                   |                                                                                                                                                                    |           |              |                                                                                                                                                                                                                                                                                                                                                                                                                                                                                                                                                                                                                                                                                  |                                                                                                                                                                                                                                           |
| Why                 | To improve the mental health of individuals experiencing anxiety and/or depression through engagement with nature.                                                                                                                                                                                                                                                                                                                                                                                                                                                                                                                                                                                                 |                                                                                                                                                                                                                                                                                                                                                                                                                                                                                                                                                                                                                                                                                                                                                                                                                                                                                                                                                                                                                 |              |                        |                                                                |                                  |              |             |        |          |    |           |                 |    |                    |   |   |                   |              |    |       |                                                                |    |                                                                                         |                                                                                                                                                                                                                                                                                                                                                                                                                                                                                                                                                                                                                                                                                                                                                                                                                                                                                                                                                                                                                                                                                                                                                                                                                                                                                                                                                                                                                                                                                                                                                                                                                                                  |      |                                          |     |                                                                                                                                                                                  |      |                                                                                                                                                                                                                                                                                                                                                                                                                                                                                                                                                                                                                                                                                                                    |              |                                                                                                                                   |     |              |       |                                                                     |                   |                                                                                                                                                                    |           |              |                                                                                                                                                                                                                                                                                                                                                                                                                                                                                                                                                                                                                                                                                  |                                                                                                                                                                                                                                           |
| What                | Participants were recruited through a community mental wellbeing service. This non-governmental organisation offers one-to-one and group therapy, as well as signposting individuals to suitable health promoting interventions delivered by third-party organisations. A structured six-week nature-based health intervention (NBI) consisted of a broad range of nature-focused activities that took place within a wetland site.                                                                                                                                                                                                                                                                                |                                                                                                                                                                                                                                                                                                                                                                                                                                                                                                                                                                                                                                                                                                                                                                                                                                                                                                                                                                                                                 |              |                        |                                                                |                                  |              |             |        |          |    |           |                 |    |                    |   |   |                   |              |    |       |                                                                |    |                                                                                         |                                                                                                                                                                                                                                                                                                                                                                                                                                                                                                                                                                                                                                                                                                                                                                                                                                                                                                                                                                                                                                                                                                                                                                                                                                                                                                                                                                                                                                                                                                                                                                                                                                                  |      |                                          |     |                                                                                                                                                                                  |      |                                                                                                                                                                                                                                                                                                                                                                                                                                                                                                                                                                                                                                                                                                                    |              |                                                                                                                                   |     |              |       |                                                                     |                   |                                                                                                                                                                    |           |              |                                                                                                                                                                                                                                                                                                                                                                                                                                                                                                                                                                                                                                                                                  |                                                                                                                                                                                                                                           |
| Who provided        | Community mental wellbeing service: mental health support workers                                                                                                                                                                                                                                                                                                                                                                                                                                                                                                                                                                                                                                                  |                                                                                                                                                                                                                                                                                                                                                                                                                                                                                                                                                                                                                                                                                                                                                                                                                                                                                                                                                                                                                 |              |                        |                                                                |                                  |              |             |        |          |    |           |                 |    |                    |   |   |                   |              |    |       |                                                                |    |                                                                                         |                                                                                                                                                                                                                                                                                                                                                                                                                                                                                                                                                                                                                                                                                                                                                                                                                                                                                                                                                                                                                                                                                                                                                                                                                                                                                                                                                                                                                                                                                                                                                                                                                                                  |      |                                          |     |                                                                                                                                                                                  |      |                                                                                                                                                                                                                                                                                                                                                                                                                                                                                                                                                                                                                                                                                                                    |              |                                                                                                                                   |     |              |       |                                                                     |                   |                                                                                                                                                                    |           |              |                                                                                                                                                                                                                                                                                                                                                                                                                                                                                                                                                                                                                                                                                  |                                                                                                                                                                                                                                           |
| How                 | Face-to-face                                                                                                                                                                                                                                                                                                                                                                                                                                                                                                                                                                                                                                                                                                       |                                                                                                                                                                                                                                                                                                                                                                                                                                                                                                                                                                                                                                                                                                                                                                                                                                                                                                                                                                                                                 |              |                        |                                                                |                                  |              |             |        |          |    |           |                 |    |                    |   |   |                   |              |    |       |                                                                |    |                                                                                         |                                                                                                                                                                                                                                                                                                                                                                                                                                                                                                                                                                                                                                                                                                                                                                                                                                                                                                                                                                                                                                                                                                                                                                                                                                                                                                                                                                                                                                                                                                                                                                                                                                                  |      |                                          |     |                                                                                                                                                                                  |      |                                                                                                                                                                                                                                                                                                                                                                                                                                                                                                                                                                                                                                                                                                                    |              |                                                                                                                                   |     |              |       |                                                                     |                   |                                                                                                                                                                    |           |              |                                                                                                                                                                                                                                                                                                                                                                                                                                                                                                                                                                                                                                                                                  |                                                                                                                                                                                                                                           |
| Where               | Wildfowl & Wetlands Trust (WWT) wetland site in Gloucestershire, UK                                                                                                                                                                                                                                                                                                                                                                                                                                                                                                                                                                                                                                                |                                                                                                                                                                                                                                                                                                                                                                                                                                                                                                                                                                                                                                                                                                                                                                                                                                                                                                                                                                                                                 |              |                        |                                                                |                                  |              |             |        |          |    |           |                 |    |                    |   |   |                   |              |    |       |                                                                |    |                                                                                         |                                                                                                                                                                                                                                                                                                                                                                                                                                                                                                                                                                                                                                                                                                                                                                                                                                                                                                                                                                                                                                                                                                                                                                                                                                                                                                                                                                                                                                                                                                                                                                                                                                                  |      |                                          |     |                                                                                                                                                                                  |      |                                                                                                                                                                                                                                                                                                                                                                                                                                                                                                                                                                                                                                                                                                                    |              |                                                                                                                                   |     |              |       |                                                                     |                   |                                                                                                                                                                    |           |              |                                                                                                                                                                                                                                                                                                                                                                                                                                                                                                                                                                                                                                                                                  |                                                                                                                                                                                                                                           |
| When and How Much   | Participants took part in a two-hour session per week for six consecutive weeks.                                                                                                                                                                                                                                                                                                                                                                                                                                                                                                                                                                                                                                   |                                                                                                                                                                                                                                                                                                                                                                                                                                                                                                                                                                                                                                                                                                                                                                                                                                                                                                                                                                                                                 |              |                        |                                                                |                                  |              |             |        |          |    |           |                 |    |                    |   |   |                   |              |    |       |                                                                |    |                                                                                         |                                                                                                                                                                                                                                                                                                                                                                                                                                                                                                                                                                                                                                                                                                                                                                                                                                                                                                                                                                                                                                                                                                                                                                                                                                                                                                                                                                                                                                                                                                                                                                                                                                                  |      |                                          |     |                                                                                                                                                                                  |      |                                                                                                                                                                                                                                                                                                                                                                                                                                                                                                                                                                                                                                                                                                                    |              |                                                                                                                                   |     |              |       |                                                                     |                   |                                                                                                                                                                    |           |              |                                                                                                                                                                                                                                                                                                                                                                                                                                                                                                                                                                                                                                                                                  |                                                                                                                                                                                                                                           |
| Tailoring           | -                                                                                                                                                                                                                                                                                                                                                                                                                                                                                                                                                                                                                                                                                                                  |                                                                                                                                                                                                                                                                                                                                                                                                                                                                                                                                                                                                                                                                                                                                                                                                                                                                                                                                                                                                                 |              |                        |                                                                |                                  |              |             |        |          |    |           |                 |    |                    |   |   |                   |              |    |       |                                                                |    |                                                                                         |                                                                                                                                                                                                                                                                                                                                                                                                                                                                                                                                                                                                                                                                                                                                                                                                                                                                                                                                                                                                                                                                                                                                                                                                                                                                                                                                                                                                                                                                                                                                                                                                                                                  |      |                                          |     |                                                                                                                                                                                  |      |                                                                                                                                                                                                                                                                                                                                                                                                                                                                                                                                                                                                                                                                                                                    |              |                                                                                                                                   |     |              |       |                                                                     |                   |                                                                                                                                                                    |           |              |                                                                                                                                                                                                                                                                                                                                                                                                                                                                                                                                                                                                                                                                                  |                                                                                                                                                                                                                                           |
| Mercer 2019 (92,93) | Cluster randomized                                                                                                                                                                                                                                                                                                                                                                                                                                                                                                                                                                                                                                                                                                 | <p><b>Inclusion criteria:</b></p> <p><b>Intervention:</b></p>                                                                                                                                                                                                                                                                                                                                                                                                                                                                                                                                                                                                                                                                                                                                                                                                                                                                                                                                                   | Primary Care |                        | <p>Patient outcomes at baseline and 9 months follow-up via</p> | <p>Peer-Review: Partly (1/2)</p> |              |             |        |          |    |           |                 |    |                    |   |   |                   |              |    |       |                                                                |    |                                                                                         |                                                                                                                                                                                                                                                                                                                                                                                                                                                                                                                                                                                                                                                                                                                                                                                                                                                                                                                                                                                                                                                                                                                                                                                                                                                                                                                                                                                                                                                                                                                                                                                                                                                  |      |                                          |     |                                                                                                                                                                                  |      |                                                                                                                                                                                                                                                                                                                                                                                                                                                                                                                                                                                                                                                                                                                    |              |                                                                                                                                   |     |              |       |                                                                     |                   |                                                                                                                                                                    |           |              |                                                                                                                                                                                                                                                                                                                                                                                                                                                                                                                                                                                                                                                                                  |                                                                                                                                                                                                                                           |

| <p>controlled trial, quasi-experimental, mixed-methods</p> <p>Study length: -</p> | <p>Adult patients (aged 18 years or older).</p> <p>Control:</p> <p>- 1,000 adult patients (aged 18 years or older) registered with a comparator practice were randomly selected for invitation to participate in the evaluation.</p> <p>- Practices were eligible for the program if they were located in Glasgow and in the 100 practices in Scotland serving the most-deprived patients (15% most-deprived postcodes in Scotland)</p> <p><b>Exclusion criteria:</b></p> <p>Intervention: -</p> <p>Control:</p> <p>A senior GP in each practice reviewed the list to remove patients they considered inappropriate for health or social reasons (such as terminal illness or family or other social crisis).</p> <p>Baseline characteristics:</p> <table border="1" data-bbox="477 726 997 1194"> <thead> <tr> <th></th> <th></th> <th>I</th> <th>C</th> </tr> </thead> <tbody> <tr> <td>N</td> <td></td> <td>288</td> <td>612</td> </tr> <tr> <td>Age</td> <td>Mean (SD)</td> <td>49 (15)</td> <td>56 (15)</td> </tr> <tr> <td>Gender</td> <td>Female %</td> <td>59.2</td> <td>61.1</td> </tr> <tr> <td>Ethnicity</td> <td>-</td> <td>-</td> <td>-</td> </tr> <tr> <td>Living arrangement</td> <td>Lives alone %</td> <td>67.5</td> <td>45.9</td> </tr> <tr> <td>Employment status</td> <td>Any employment (%)</td> <td>24.1</td> <td>48.7</td> </tr> <tr> <td>Other</td> <td>Deprived %</td> <td>79.3</td> <td>58.1</td> </tr> </tbody> </table> <p>Population: General</p> |                                                                               |         | I   | C   | N         |        | 288    | 612      | Age | Mean (SD) | 49 (15) | 56 (15) | Gender             | Female % | 59.2 | 61.1              | Ethnicity | - | -                                                                | -                                                                                                                                                                                                                                                                                                                                                                                                                                                                                                                                                                                                                                                                                                                                                                                                                                                                                                                                                                                                                                                                                                                | Living arrangement | Lives alone %                 | 67.5 | 45.9 | Employment status                                                                                                                                                                                                                                        | Any employment (%) | 24.1 | 48.7                                                                                                                                                                                                                  | Other | Deprived %   | 79.3                | 58.1 | <p>Country:</p> <p>UK (Glasgow, Scotland)</p> | <table border="1" data-bbox="1308 176 2243 1230"> <thead> <tr> <th></th> <th>I</th> <th>C</th> </tr> </thead> <tbody> <tr> <td>Name</td> <td>Glasgow Deep End Links Worker Programme (LWP)</td> <td>Comparator</td> </tr> <tr> <td>Why</td> <td>Closer links between general practices and community organizations, and support to access to available community resources, could mitigate the effects of deprivation.</td> <td></td> </tr> <tr> <td>What</td> <td>CLPs made links between practices and community organizations in the local area (eg, walking groups, debt management support, welfare rights, drug and alcohol management support, lunch clubs, befriending schemes, crafting clubs, bereavement support). Each practice devised its own system for GPs and PNs to identify and refer patients who would benefit from help from a CLP who would link them to community-based resources. CLPs met patients, elicited patients' main needs, and worked flexibly, making links with community organizations for patients and, if necessary, supporting patients to attend the organizations' services. Services depended on patients' needs, their enthusiasm to engage, and the availability of local services accessible to patients.</td> <td>Comparison practices were not allocated a CLP or a practice development fund.</td> </tr> <tr> <td>Who provided</td> <td colspan="2">A practice-attached CLP with a previous working background in community development.<br/><br/>Support included an experienced program director; a community links manager; a learning and evaluation officer, administrative staff and a clinical lead.</td> </tr> <tr> <td>How</td> <td colspan="2">One-to-one, face-to-face, telephone contacts could occur.</td> </tr> <tr> <td>Where</td> <td colspan="2">Usually in the practice, although some home visits could occur, and the CLPs could accompany patients to support their contact with a community organization</td> </tr> <tr> <td>When and How Much</td> <td colspan="2">CLPs and patients could meet as many times they thought necessary</td> </tr> <tr> <td>Tailoring</td> <td colspan="2">Flexible</td> </tr> </tbody> </table> <p>Intervention: Holistic</p> |  | I     | C                                             | Name | Glasgow Deep End Links Worker Programme (LWP) | Comparator | Why | Closer links between general practices and community organizations, and support to access to available community resources, could mitigate the effects of deprivation. |              | What | CLPs made links between practices and community organizations in the local area (eg, walking groups, debt management support, welfare rights, drug and alcohol management support, lunch clubs, befriending schemes, crafting clubs, bereavement support). Each practice devised its own system for GPs and PNs to identify and refer patients who would benefit from help from a CLP who would link them to community-based resources. CLPs met patients, elicited patients' main needs, and worked flexibly, making links with community organizations for patients and, if necessary, supporting patients to attend the organizations' services. Services depended on patients' needs, their enthusiasm to engage, and the availability of local services accessible to patients. | Comparison practices were not allocated a CLP or a practice development fund.                                                                                | Who provided | A practice-attached CLP with a previous working background in community development.<br><br>Support included an experienced program director; a community links manager; a learning and evaluation officer, administrative staff and a clinical lead. |  | How | One-to-one, face-to-face, telephone contacts could occur. |  | Where | Usually in the practice, although some home visits could occur, and the CLPs could accompany patients to support their contact with a community organization |  | When and How Much | CLPs and patients could meet as many times they thought necessary |  | Tailoring | Flexible |  | <p>questionnaire. Subgroup analyses by number of times seen by CLP:</p> <ul style="list-style-type: none"> <li>- EQ-5D-5L</li> <li>- Investigating Choice Experiments for the Preferences of Older People Capability Measure for Adults</li> <li>- Work and Social Adjustment Scale</li> <li>- Hospital Anxiety and Depression Scale</li> <li>- Self-reported exercise</li> <li>- Number of medications</li> </ul> | <p>Funding source:</p> <p>NHS Health Scotland (contract 66450/1, 13/08/2014)</p> <p>Declarations of interest:</p> <p>None declared</p> |
|-----------------------------------------------------------------------------------|--------------------------------------------------------------------------------------------------------------------------------------------------------------------------------------------------------------------------------------------------------------------------------------------------------------------------------------------------------------------------------------------------------------------------------------------------------------------------------------------------------------------------------------------------------------------------------------------------------------------------------------------------------------------------------------------------------------------------------------------------------------------------------------------------------------------------------------------------------------------------------------------------------------------------------------------------------------------------------------------------------------------------------------------------------------------------------------------------------------------------------------------------------------------------------------------------------------------------------------------------------------------------------------------------------------------------------------------------------------------------------------------------------------------------------------------------------------------------------|-------------------------------------------------------------------------------|---------|-----|-----|-----------|--------|--------|----------|-----|-----------|---------|---------|--------------------|----------|------|-------------------|-----------|---|------------------------------------------------------------------|------------------------------------------------------------------------------------------------------------------------------------------------------------------------------------------------------------------------------------------------------------------------------------------------------------------------------------------------------------------------------------------------------------------------------------------------------------------------------------------------------------------------------------------------------------------------------------------------------------------------------------------------------------------------------------------------------------------------------------------------------------------------------------------------------------------------------------------------------------------------------------------------------------------------------------------------------------------------------------------------------------------------------------------------------------------------------------------------------------------|--------------------|-------------------------------|------|------|----------------------------------------------------------------------------------------------------------------------------------------------------------------------------------------------------------------------------------------------------------|--------------------|------|-----------------------------------------------------------------------------------------------------------------------------------------------------------------------------------------------------------------------|-------|--------------|---------------------|------|-----------------------------------------------|-------------------------------------------------------------------------------------------------------------------------------------------------------------------------------------------------------------------------------------------------------------------------------------------------------------------------------------------------------------------------------------------------------------------------------------------------------------------------------------------------------------------------------------------------------------------------------------------------------------------------------------------------------------------------------------------------------------------------------------------------------------------------------------------------------------------------------------------------------------------------------------------------------------------------------------------------------------------------------------------------------------------------------------------------------------------------------------------------------------------------------------------------------------------------------------------------------------------------------------------------------------------------------------------------------------------------------------------------------------------------------------------------------------------------------------------------------------------------------------------------------------------------------------------------------------------------------------------------------------------------------------------------------------------------------------------------------------------------------------------------------------------------------------------------------------------------------------------------------------------------------------------------------------------------------------------------------------------------------------------------------------------------------------------------------------------------------------------------------------------------------------------------------------------------------------------------------------------------------------|--|-------|-----------------------------------------------|------|-----------------------------------------------|------------|-----|------------------------------------------------------------------------------------------------------------------------------------------------------------------------|--------------|------|--------------------------------------------------------------------------------------------------------------------------------------------------------------------------------------------------------------------------------------------------------------------------------------------------------------------------------------------------------------------------------------------------------------------------------------------------------------------------------------------------------------------------------------------------------------------------------------------------------------------------------------------------------------------------------------------------------------------------------------------------------------------------------------|--------------------------------------------------------------------------------------------------------------------------------------------------------------|--------------|-------------------------------------------------------------------------------------------------------------------------------------------------------------------------------------------------------------------------------------------------------|--|-----|-----------------------------------------------------------|--|-------|--------------------------------------------------------------------------------------------------------------------------------------------------------------|--|-------------------|-------------------------------------------------------------------|--|-----------|----------|--|--------------------------------------------------------------------------------------------------------------------------------------------------------------------------------------------------------------------------------------------------------------------------------------------------------------------------------------------------------------------------------------------------------------------|----------------------------------------------------------------------------------------------------------------------------------------|
|                                                                                   |                                                                                                                                                                                                                                                                                                                                                                                                                                                                                                                                                                                                                                                                                                                                                                                                                                                                                                                                                                                                                                                                                                                                                                                                                                                                                                                                                                                                                                                                                | I                                                                             | C       |     |     |           |        |        |          |     |           |         |         |                    |          |      |                   |           |   |                                                                  |                                                                                                                                                                                                                                                                                                                                                                                                                                                                                                                                                                                                                                                                                                                                                                                                                                                                                                                                                                                                                                                                                                                  |                    |                               |      |      |                                                                                                                                                                                                                                                          |                    |      |                                                                                                                                                                                                                       |       |              |                     |      |                                               |                                                                                                                                                                                                                                                                                                                                                                                                                                                                                                                                                                                                                                                                                                                                                                                                                                                                                                                                                                                                                                                                                                                                                                                                                                                                                                                                                                                                                                                                                                                                                                                                                                                                                                                                                                                                                                                                                                                                                                                                                                                                                                                                                                                                                                     |  |       |                                               |      |                                               |            |     |                                                                                                                                                                        |              |      |                                                                                                                                                                                                                                                                                                                                                                                                                                                                                                                                                                                                                                                                                                                                                                                      |                                                                                                                                                              |              |                                                                                                                                                                                                                                                       |  |     |                                                           |  |       |                                                                                                                                                              |  |                   |                                                                   |  |           |          |  |                                                                                                                                                                                                                                                                                                                                                                                                                    |                                                                                                                                        |
| N                                                                                 |                                                                                                                                                                                                                                                                                                                                                                                                                                                                                                                                                                                                                                                                                                                                                                                                                                                                                                                                                                                                                                                                                                                                                                                                                                                                                                                                                                                                                                                                                | 288                                                                           | 612     |     |     |           |        |        |          |     |           |         |         |                    |          |      |                   |           |   |                                                                  |                                                                                                                                                                                                                                                                                                                                                                                                                                                                                                                                                                                                                                                                                                                                                                                                                                                                                                                                                                                                                                                                                                                  |                    |                               |      |      |                                                                                                                                                                                                                                                          |                    |      |                                                                                                                                                                                                                       |       |              |                     |      |                                               |                                                                                                                                                                                                                                                                                                                                                                                                                                                                                                                                                                                                                                                                                                                                                                                                                                                                                                                                                                                                                                                                                                                                                                                                                                                                                                                                                                                                                                                                                                                                                                                                                                                                                                                                                                                                                                                                                                                                                                                                                                                                                                                                                                                                                                     |  |       |                                               |      |                                               |            |     |                                                                                                                                                                        |              |      |                                                                                                                                                                                                                                                                                                                                                                                                                                                                                                                                                                                                                                                                                                                                                                                      |                                                                                                                                                              |              |                                                                                                                                                                                                                                                       |  |     |                                                           |  |       |                                                                                                                                                              |  |                   |                                                                   |  |           |          |  |                                                                                                                                                                                                                                                                                                                                                                                                                    |                                                                                                                                        |
| Age                                                                               | Mean (SD)                                                                                                                                                                                                                                                                                                                                                                                                                                                                                                                                                                                                                                                                                                                                                                                                                                                                                                                                                                                                                                                                                                                                                                                                                                                                                                                                                                                                                                                                      | 49 (15)                                                                       | 56 (15) |     |     |           |        |        |          |     |           |         |         |                    |          |      |                   |           |   |                                                                  |                                                                                                                                                                                                                                                                                                                                                                                                                                                                                                                                                                                                                                                                                                                                                                                                                                                                                                                                                                                                                                                                                                                  |                    |                               |      |      |                                                                                                                                                                                                                                                          |                    |      |                                                                                                                                                                                                                       |       |              |                     |      |                                               |                                                                                                                                                                                                                                                                                                                                                                                                                                                                                                                                                                                                                                                                                                                                                                                                                                                                                                                                                                                                                                                                                                                                                                                                                                                                                                                                                                                                                                                                                                                                                                                                                                                                                                                                                                                                                                                                                                                                                                                                                                                                                                                                                                                                                                     |  |       |                                               |      |                                               |            |     |                                                                                                                                                                        |              |      |                                                                                                                                                                                                                                                                                                                                                                                                                                                                                                                                                                                                                                                                                                                                                                                      |                                                                                                                                                              |              |                                                                                                                                                                                                                                                       |  |     |                                                           |  |       |                                                                                                                                                              |  |                   |                                                                   |  |           |          |  |                                                                                                                                                                                                                                                                                                                                                                                                                    |                                                                                                                                        |
| Gender                                                                            | Female %                                                                                                                                                                                                                                                                                                                                                                                                                                                                                                                                                                                                                                                                                                                                                                                                                                                                                                                                                                                                                                                                                                                                                                                                                                                                                                                                                                                                                                                                       | 59.2                                                                          | 61.1    |     |     |           |        |        |          |     |           |         |         |                    |          |      |                   |           |   |                                                                  |                                                                                                                                                                                                                                                                                                                                                                                                                                                                                                                                                                                                                                                                                                                                                                                                                                                                                                                                                                                                                                                                                                                  |                    |                               |      |      |                                                                                                                                                                                                                                                          |                    |      |                                                                                                                                                                                                                       |       |              |                     |      |                                               |                                                                                                                                                                                                                                                                                                                                                                                                                                                                                                                                                                                                                                                                                                                                                                                                                                                                                                                                                                                                                                                                                                                                                                                                                                                                                                                                                                                                                                                                                                                                                                                                                                                                                                                                                                                                                                                                                                                                                                                                                                                                                                                                                                                                                                     |  |       |                                               |      |                                               |            |     |                                                                                                                                                                        |              |      |                                                                                                                                                                                                                                                                                                                                                                                                                                                                                                                                                                                                                                                                                                                                                                                      |                                                                                                                                                              |              |                                                                                                                                                                                                                                                       |  |     |                                                           |  |       |                                                                                                                                                              |  |                   |                                                                   |  |           |          |  |                                                                                                                                                                                                                                                                                                                                                                                                                    |                                                                                                                                        |
| Ethnicity                                                                         | -                                                                                                                                                                                                                                                                                                                                                                                                                                                                                                                                                                                                                                                                                                                                                                                                                                                                                                                                                                                                                                                                                                                                                                                                                                                                                                                                                                                                                                                                              | -                                                                             | -       |     |     |           |        |        |          |     |           |         |         |                    |          |      |                   |           |   |                                                                  |                                                                                                                                                                                                                                                                                                                                                                                                                                                                                                                                                                                                                                                                                                                                                                                                                                                                                                                                                                                                                                                                                                                  |                    |                               |      |      |                                                                                                                                                                                                                                                          |                    |      |                                                                                                                                                                                                                       |       |              |                     |      |                                               |                                                                                                                                                                                                                                                                                                                                                                                                                                                                                                                                                                                                                                                                                                                                                                                                                                                                                                                                                                                                                                                                                                                                                                                                                                                                                                                                                                                                                                                                                                                                                                                                                                                                                                                                                                                                                                                                                                                                                                                                                                                                                                                                                                                                                                     |  |       |                                               |      |                                               |            |     |                                                                                                                                                                        |              |      |                                                                                                                                                                                                                                                                                                                                                                                                                                                                                                                                                                                                                                                                                                                                                                                      |                                                                                                                                                              |              |                                                                                                                                                                                                                                                       |  |     |                                                           |  |       |                                                                                                                                                              |  |                   |                                                                   |  |           |          |  |                                                                                                                                                                                                                                                                                                                                                                                                                    |                                                                                                                                        |
| Living arrangement                                                                | Lives alone %                                                                                                                                                                                                                                                                                                                                                                                                                                                                                                                                                                                                                                                                                                                                                                                                                                                                                                                                                                                                                                                                                                                                                                                                                                                                                                                                                                                                                                                                  | 67.5                                                                          | 45.9    |     |     |           |        |        |          |     |           |         |         |                    |          |      |                   |           |   |                                                                  |                                                                                                                                                                                                                                                                                                                                                                                                                                                                                                                                                                                                                                                                                                                                                                                                                                                                                                                                                                                                                                                                                                                  |                    |                               |      |      |                                                                                                                                                                                                                                                          |                    |      |                                                                                                                                                                                                                       |       |              |                     |      |                                               |                                                                                                                                                                                                                                                                                                                                                                                                                                                                                                                                                                                                                                                                                                                                                                                                                                                                                                                                                                                                                                                                                                                                                                                                                                                                                                                                                                                                                                                                                                                                                                                                                                                                                                                                                                                                                                                                                                                                                                                                                                                                                                                                                                                                                                     |  |       |                                               |      |                                               |            |     |                                                                                                                                                                        |              |      |                                                                                                                                                                                                                                                                                                                                                                                                                                                                                                                                                                                                                                                                                                                                                                                      |                                                                                                                                                              |              |                                                                                                                                                                                                                                                       |  |     |                                                           |  |       |                                                                                                                                                              |  |                   |                                                                   |  |           |          |  |                                                                                                                                                                                                                                                                                                                                                                                                                    |                                                                                                                                        |
| Employment status                                                                 | Any employment (%)                                                                                                                                                                                                                                                                                                                                                                                                                                                                                                                                                                                                                                                                                                                                                                                                                                                                                                                                                                                                                                                                                                                                                                                                                                                                                                                                                                                                                                                             | 24.1                                                                          | 48.7    |     |     |           |        |        |          |     |           |         |         |                    |          |      |                   |           |   |                                                                  |                                                                                                                                                                                                                                                                                                                                                                                                                                                                                                                                                                                                                                                                                                                                                                                                                                                                                                                                                                                                                                                                                                                  |                    |                               |      |      |                                                                                                                                                                                                                                                          |                    |      |                                                                                                                                                                                                                       |       |              |                     |      |                                               |                                                                                                                                                                                                                                                                                                                                                                                                                                                                                                                                                                                                                                                                                                                                                                                                                                                                                                                                                                                                                                                                                                                                                                                                                                                                                                                                                                                                                                                                                                                                                                                                                                                                                                                                                                                                                                                                                                                                                                                                                                                                                                                                                                                                                                     |  |       |                                               |      |                                               |            |     |                                                                                                                                                                        |              |      |                                                                                                                                                                                                                                                                                                                                                                                                                                                                                                                                                                                                                                                                                                                                                                                      |                                                                                                                                                              |              |                                                                                                                                                                                                                                                       |  |     |                                                           |  |       |                                                                                                                                                              |  |                   |                                                                   |  |           |          |  |                                                                                                                                                                                                                                                                                                                                                                                                                    |                                                                                                                                        |
| Other                                                                             | Deprived %                                                                                                                                                                                                                                                                                                                                                                                                                                                                                                                                                                                                                                                                                                                                                                                                                                                                                                                                                                                                                                                                                                                                                                                                                                                                                                                                                                                                                                                                     | 79.3                                                                          | 58.1    |     |     |           |        |        |          |     |           |         |         |                    |          |      |                   |           |   |                                                                  |                                                                                                                                                                                                                                                                                                                                                                                                                                                                                                                                                                                                                                                                                                                                                                                                                                                                                                                                                                                                                                                                                                                  |                    |                               |      |      |                                                                                                                                                                                                                                                          |                    |      |                                                                                                                                                                                                                       |       |              |                     |      |                                               |                                                                                                                                                                                                                                                                                                                                                                                                                                                                                                                                                                                                                                                                                                                                                                                                                                                                                                                                                                                                                                                                                                                                                                                                                                                                                                                                                                                                                                                                                                                                                                                                                                                                                                                                                                                                                                                                                                                                                                                                                                                                                                                                                                                                                                     |  |       |                                               |      |                                               |            |     |                                                                                                                                                                        |              |      |                                                                                                                                                                                                                                                                                                                                                                                                                                                                                                                                                                                                                                                                                                                                                                                      |                                                                                                                                                              |              |                                                                                                                                                                                                                                                       |  |     |                                                           |  |       |                                                                                                                                                              |  |                   |                                                                   |  |           |          |  |                                                                                                                                                                                                                                                                                                                                                                                                                    |                                                                                                                                        |
|                                                                                   | I                                                                                                                                                                                                                                                                                                                                                                                                                                                                                                                                                                                                                                                                                                                                                                                                                                                                                                                                                                                                                                                                                                                                                                                                                                                                                                                                                                                                                                                                              | C                                                                             |         |     |     |           |        |        |          |     |           |         |         |                    |          |      |                   |           |   |                                                                  |                                                                                                                                                                                                                                                                                                                                                                                                                                                                                                                                                                                                                                                                                                                                                                                                                                                                                                                                                                                                                                                                                                                  |                    |                               |      |      |                                                                                                                                                                                                                                                          |                    |      |                                                                                                                                                                                                                       |       |              |                     |      |                                               |                                                                                                                                                                                                                                                                                                                                                                                                                                                                                                                                                                                                                                                                                                                                                                                                                                                                                                                                                                                                                                                                                                                                                                                                                                                                                                                                                                                                                                                                                                                                                                                                                                                                                                                                                                                                                                                                                                                                                                                                                                                                                                                                                                                                                                     |  |       |                                               |      |                                               |            |     |                                                                                                                                                                        |              |      |                                                                                                                                                                                                                                                                                                                                                                                                                                                                                                                                                                                                                                                                                                                                                                                      |                                                                                                                                                              |              |                                                                                                                                                                                                                                                       |  |     |                                                           |  |       |                                                                                                                                                              |  |                   |                                                                   |  |           |          |  |                                                                                                                                                                                                                                                                                                                                                                                                                    |                                                                                                                                        |
| Name                                                                              | Glasgow Deep End Links Worker Programme (LWP)                                                                                                                                                                                                                                                                                                                                                                                                                                                                                                                                                                                                                                                                                                                                                                                                                                                                                                                                                                                                                                                                                                                                                                                                                                                                                                                                                                                                                                  | Comparator                                                                    |         |     |     |           |        |        |          |     |           |         |         |                    |          |      |                   |           |   |                                                                  |                                                                                                                                                                                                                                                                                                                                                                                                                                                                                                                                                                                                                                                                                                                                                                                                                                                                                                                                                                                                                                                                                                                  |                    |                               |      |      |                                                                                                                                                                                                                                                          |                    |      |                                                                                                                                                                                                                       |       |              |                     |      |                                               |                                                                                                                                                                                                                                                                                                                                                                                                                                                                                                                                                                                                                                                                                                                                                                                                                                                                                                                                                                                                                                                                                                                                                                                                                                                                                                                                                                                                                                                                                                                                                                                                                                                                                                                                                                                                                                                                                                                                                                                                                                                                                                                                                                                                                                     |  |       |                                               |      |                                               |            |     |                                                                                                                                                                        |              |      |                                                                                                                                                                                                                                                                                                                                                                                                                                                                                                                                                                                                                                                                                                                                                                                      |                                                                                                                                                              |              |                                                                                                                                                                                                                                                       |  |     |                                                           |  |       |                                                                                                                                                              |  |                   |                                                                   |  |           |          |  |                                                                                                                                                                                                                                                                                                                                                                                                                    |                                                                                                                                        |
| Why                                                                               | Closer links between general practices and community organizations, and support to access to available community resources, could mitigate the effects of deprivation.                                                                                                                                                                                                                                                                                                                                                                                                                                                                                                                                                                                                                                                                                                                                                                                                                                                                                                                                                                                                                                                                                                                                                                                                                                                                                                         |                                                                               |         |     |     |           |        |        |          |     |           |         |         |                    |          |      |                   |           |   |                                                                  |                                                                                                                                                                                                                                                                                                                                                                                                                                                                                                                                                                                                                                                                                                                                                                                                                                                                                                                                                                                                                                                                                                                  |                    |                               |      |      |                                                                                                                                                                                                                                                          |                    |      |                                                                                                                                                                                                                       |       |              |                     |      |                                               |                                                                                                                                                                                                                                                                                                                                                                                                                                                                                                                                                                                                                                                                                                                                                                                                                                                                                                                                                                                                                                                                                                                                                                                                                                                                                                                                                                                                                                                                                                                                                                                                                                                                                                                                                                                                                                                                                                                                                                                                                                                                                                                                                                                                                                     |  |       |                                               |      |                                               |            |     |                                                                                                                                                                        |              |      |                                                                                                                                                                                                                                                                                                                                                                                                                                                                                                                                                                                                                                                                                                                                                                                      |                                                                                                                                                              |              |                                                                                                                                                                                                                                                       |  |     |                                                           |  |       |                                                                                                                                                              |  |                   |                                                                   |  |           |          |  |                                                                                                                                                                                                                                                                                                                                                                                                                    |                                                                                                                                        |
| What                                                                              | CLPs made links between practices and community organizations in the local area (eg, walking groups, debt management support, welfare rights, drug and alcohol management support, lunch clubs, befriending schemes, crafting clubs, bereavement support). Each practice devised its own system for GPs and PNs to identify and refer patients who would benefit from help from a CLP who would link them to community-based resources. CLPs met patients, elicited patients' main needs, and worked flexibly, making links with community organizations for patients and, if necessary, supporting patients to attend the organizations' services. Services depended on patients' needs, their enthusiasm to engage, and the availability of local services accessible to patients.                                                                                                                                                                                                                                                                                                                                                                                                                                                                                                                                                                                                                                                                                           | Comparison practices were not allocated a CLP or a practice development fund. |         |     |     |           |        |        |          |     |           |         |         |                    |          |      |                   |           |   |                                                                  |                                                                                                                                                                                                                                                                                                                                                                                                                                                                                                                                                                                                                                                                                                                                                                                                                                                                                                                                                                                                                                                                                                                  |                    |                               |      |      |                                                                                                                                                                                                                                                          |                    |      |                                                                                                                                                                                                                       |       |              |                     |      |                                               |                                                                                                                                                                                                                                                                                                                                                                                                                                                                                                                                                                                                                                                                                                                                                                                                                                                                                                                                                                                                                                                                                                                                                                                                                                                                                                                                                                                                                                                                                                                                                                                                                                                                                                                                                                                                                                                                                                                                                                                                                                                                                                                                                                                                                                     |  |       |                                               |      |                                               |            |     |                                                                                                                                                                        |              |      |                                                                                                                                                                                                                                                                                                                                                                                                                                                                                                                                                                                                                                                                                                                                                                                      |                                                                                                                                                              |              |                                                                                                                                                                                                                                                       |  |     |                                                           |  |       |                                                                                                                                                              |  |                   |                                                                   |  |           |          |  |                                                                                                                                                                                                                                                                                                                                                                                                                    |                                                                                                                                        |
| Who provided                                                                      | A practice-attached CLP with a previous working background in community development.<br><br>Support included an experienced program director; a community links manager; a learning and evaluation officer, administrative staff and a clinical lead.                                                                                                                                                                                                                                                                                                                                                                                                                                                                                                                                                                                                                                                                                                                                                                                                                                                                                                                                                                                                                                                                                                                                                                                                                          |                                                                               |         |     |     |           |        |        |          |     |           |         |         |                    |          |      |                   |           |   |                                                                  |                                                                                                                                                                                                                                                                                                                                                                                                                                                                                                                                                                                                                                                                                                                                                                                                                                                                                                                                                                                                                                                                                                                  |                    |                               |      |      |                                                                                                                                                                                                                                                          |                    |      |                                                                                                                                                                                                                       |       |              |                     |      |                                               |                                                                                                                                                                                                                                                                                                                                                                                                                                                                                                                                                                                                                                                                                                                                                                                                                                                                                                                                                                                                                                                                                                                                                                                                                                                                                                                                                                                                                                                                                                                                                                                                                                                                                                                                                                                                                                                                                                                                                                                                                                                                                                                                                                                                                                     |  |       |                                               |      |                                               |            |     |                                                                                                                                                                        |              |      |                                                                                                                                                                                                                                                                                                                                                                                                                                                                                                                                                                                                                                                                                                                                                                                      |                                                                                                                                                              |              |                                                                                                                                                                                                                                                       |  |     |                                                           |  |       |                                                                                                                                                              |  |                   |                                                                   |  |           |          |  |                                                                                                                                                                                                                                                                                                                                                                                                                    |                                                                                                                                        |
| How                                                                               | One-to-one, face-to-face, telephone contacts could occur.                                                                                                                                                                                                                                                                                                                                                                                                                                                                                                                                                                                                                                                                                                                                                                                                                                                                                                                                                                                                                                                                                                                                                                                                                                                                                                                                                                                                                      |                                                                               |         |     |     |           |        |        |          |     |           |         |         |                    |          |      |                   |           |   |                                                                  |                                                                                                                                                                                                                                                                                                                                                                                                                                                                                                                                                                                                                                                                                                                                                                                                                                                                                                                                                                                                                                                                                                                  |                    |                               |      |      |                                                                                                                                                                                                                                                          |                    |      |                                                                                                                                                                                                                       |       |              |                     |      |                                               |                                                                                                                                                                                                                                                                                                                                                                                                                                                                                                                                                                                                                                                                                                                                                                                                                                                                                                                                                                                                                                                                                                                                                                                                                                                                                                                                                                                                                                                                                                                                                                                                                                                                                                                                                                                                                                                                                                                                                                                                                                                                                                                                                                                                                                     |  |       |                                               |      |                                               |            |     |                                                                                                                                                                        |              |      |                                                                                                                                                                                                                                                                                                                                                                                                                                                                                                                                                                                                                                                                                                                                                                                      |                                                                                                                                                              |              |                                                                                                                                                                                                                                                       |  |     |                                                           |  |       |                                                                                                                                                              |  |                   |                                                                   |  |           |          |  |                                                                                                                                                                                                                                                                                                                                                                                                                    |                                                                                                                                        |
| Where                                                                             | Usually in the practice, although some home visits could occur, and the CLPs could accompany patients to support their contact with a community organization                                                                                                                                                                                                                                                                                                                                                                                                                                                                                                                                                                                                                                                                                                                                                                                                                                                                                                                                                                                                                                                                                                                                                                                                                                                                                                                   |                                                                               |         |     |     |           |        |        |          |     |           |         |         |                    |          |      |                   |           |   |                                                                  |                                                                                                                                                                                                                                                                                                                                                                                                                                                                                                                                                                                                                                                                                                                                                                                                                                                                                                                                                                                                                                                                                                                  |                    |                               |      |      |                                                                                                                                                                                                                                                          |                    |      |                                                                                                                                                                                                                       |       |              |                     |      |                                               |                                                                                                                                                                                                                                                                                                                                                                                                                                                                                                                                                                                                                                                                                                                                                                                                                                                                                                                                                                                                                                                                                                                                                                                                                                                                                                                                                                                                                                                                                                                                                                                                                                                                                                                                                                                                                                                                                                                                                                                                                                                                                                                                                                                                                                     |  |       |                                               |      |                                               |            |     |                                                                                                                                                                        |              |      |                                                                                                                                                                                                                                                                                                                                                                                                                                                                                                                                                                                                                                                                                                                                                                                      |                                                                                                                                                              |              |                                                                                                                                                                                                                                                       |  |     |                                                           |  |       |                                                                                                                                                              |  |                   |                                                                   |  |           |          |  |                                                                                                                                                                                                                                                                                                                                                                                                                    |                                                                                                                                        |
| When and How Much                                                                 | CLPs and patients could meet as many times they thought necessary                                                                                                                                                                                                                                                                                                                                                                                                                                                                                                                                                                                                                                                                                                                                                                                                                                                                                                                                                                                                                                                                                                                                                                                                                                                                                                                                                                                                              |                                                                               |         |     |     |           |        |        |          |     |           |         |         |                    |          |      |                   |           |   |                                                                  |                                                                                                                                                                                                                                                                                                                                                                                                                                                                                                                                                                                                                                                                                                                                                                                                                                                                                                                                                                                                                                                                                                                  |                    |                               |      |      |                                                                                                                                                                                                                                                          |                    |      |                                                                                                                                                                                                                       |       |              |                     |      |                                               |                                                                                                                                                                                                                                                                                                                                                                                                                                                                                                                                                                                                                                                                                                                                                                                                                                                                                                                                                                                                                                                                                                                                                                                                                                                                                                                                                                                                                                                                                                                                                                                                                                                                                                                                                                                                                                                                                                                                                                                                                                                                                                                                                                                                                                     |  |       |                                               |      |                                               |            |     |                                                                                                                                                                        |              |      |                                                                                                                                                                                                                                                                                                                                                                                                                                                                                                                                                                                                                                                                                                                                                                                      |                                                                                                                                                              |              |                                                                                                                                                                                                                                                       |  |     |                                                           |  |       |                                                                                                                                                              |  |                   |                                                                   |  |           |          |  |                                                                                                                                                                                                                                                                                                                                                                                                                    |                                                                                                                                        |
| Tailoring                                                                         | Flexible                                                                                                                                                                                                                                                                                                                                                                                                                                                                                                                                                                                                                                                                                                                                                                                                                                                                                                                                                                                                                                                                                                                                                                                                                                                                                                                                                                                                                                                                       |                                                                               |         |     |     |           |        |        |          |     |           |         |         |                    |          |      |                   |           |   |                                                                  |                                                                                                                                                                                                                                                                                                                                                                                                                                                                                                                                                                                                                                                                                                                                                                                                                                                                                                                                                                                                                                                                                                                  |                    |                               |      |      |                                                                                                                                                                                                                                                          |                    |      |                                                                                                                                                                                                                       |       |              |                     |      |                                               |                                                                                                                                                                                                                                                                                                                                                                                                                                                                                                                                                                                                                                                                                                                                                                                                                                                                                                                                                                                                                                                                                                                                                                                                                                                                                                                                                                                                                                                                                                                                                                                                                                                                                                                                                                                                                                                                                                                                                                                                                                                                                                                                                                                                                                     |  |       |                                               |      |                                               |            |     |                                                                                                                                                                        |              |      |                                                                                                                                                                                                                                                                                                                                                                                                                                                                                                                                                                                                                                                                                                                                                                                      |                                                                                                                                                              |              |                                                                                                                                                                                                                                                       |  |     |                                                           |  |       |                                                                                                                                                              |  |                   |                                                                   |  |           |          |  |                                                                                                                                                                                                                                                                                                                                                                                                                    |                                                                                                                                        |
| <p>Morton 2015 (12)</p> <p>Study length: 18 months</p>                            | <p><b>Inclusion criteria:</b></p> <p>Clients with mild to moderate mental health difficulties such as anxiety/stress, depression and low self-esteem.</p> <p><b>Exclusion criteria:</b> -</p> <p>Baseline characteristics:</p> <table border="1" data-bbox="477 1587 997 1866"> <tbody> <tr> <td>N</td> <td></td> <td>262</td> </tr> <tr> <td>Age</td> <td>Mean (SD)</td> <td>52(11)</td> </tr> <tr> <td>Gender</td> <td>Female %</td> <td>63</td> </tr> <tr> <td>Ethnicity</td> <td>-</td> <td>-</td> </tr> <tr> <td>Living arrangement</td> <td>-</td> <td>-</td> </tr> <tr> <td>Employment status</td> <td>-</td> <td>-</td> </tr> </tbody> </table>                                                                                                                                                                                                                                                                                                                                                                                                                                                                                                                                                                                                                                                                                                                                                                                                                        | N                                                                             |         | 262 | Age | Mean (SD) | 52(11) | Gender | Female % | 63  | Ethnicity | -       | -       | Living arrangement | -        | -    | Employment status | -         | - | <p>Secondary Care</p> <p>Country:</p> <p>UK (Fife, Scotland)</p> | <table border="1" data-bbox="1308 1318 2243 1839"> <tbody> <tr> <td>Name</td> <td colspan="2">Social prescribing initiative</td> </tr> <tr> <td>Why</td> <td colspan="2">Social Prescribing may be of particular benefit to isolated, marginalised and vulnerable social groups including people with mild to moderate mental health problems by addressing some of the consequences of social, economic and health inequalities.</td> </tr> <tr> <td>What</td> <td colspan="2">Referral through secondary care or self-referral. A series of free courses were offered to clients with mild to moderate mental health difficulties. Participants could then self-refer to a class of their choosing.</td> </tr> <tr> <td>Who provided</td> <td colspan="2">Fife Cultural trust</td> </tr> <tr> <td>How</td> <td colspan="2">-</td> </tr> <tr> <td>Where</td> <td colspan="2">Courses were delivered by Fife Cultural Trust</td> </tr> <tr> <td>When and How Much</td> <td colspan="2">-</td> </tr> <tr> <td>Tailoring</td> <td colspan="2">Personalized</td> </tr> </tbody> </table> <p>Intervention: Light</p> | Name               | Social prescribing initiative |      | Why  | Social Prescribing may be of particular benefit to isolated, marginalised and vulnerable social groups including people with mild to moderate mental health problems by addressing some of the consequences of social, economic and health inequalities. |                    | What | Referral through secondary care or self-referral. A series of free courses were offered to clients with mild to moderate mental health difficulties. Participants could then self-refer to a class of their choosing. |       | Who provided | Fife Cultural trust |      | How                                           | -                                                                                                                                                                                                                                                                                                                                                                                                                                                                                                                                                                                                                                                                                                                                                                                                                                                                                                                                                                                                                                                                                                                                                                                                                                                                                                                                                                                                                                                                                                                                                                                                                                                                                                                                                                                                                                                                                                                                                                                                                                                                                                                                                                                                                                   |  | Where | Courses were delivered by Fife Cultural Trust |      | When and How Much                             | -          |     | Tailoring                                                                                                                                                              | Personalized |      | <p>Patient outcomes at baseline and after the intervention, subgroups included. Feedback information was posted anonymously:</p> <ul style="list-style-type: none"> <li>- Hospital Anxiety and Depression Scale</li> <li>- General Self-Efficacy Scale</li> <li>- Warwick Edinburgh Mental Wellbeing Scale</li> </ul>                                                                                                                                                                                                                                                                                                                                                                                                                                                                | <p>Peer-Review:</p> <p>Yes</p> <p>Funding source:</p> <p>Creative Scotland and Fife Cultural Trust</p> <p>Declarations of interest:</p> <p>None declared</p> |              |                                                                                                                                                                                                                                                       |  |     |                                                           |  |       |                                                                                                                                                              |  |                   |                                                                   |  |           |          |  |                                                                                                                                                                                                                                                                                                                                                                                                                    |                                                                                                                                        |
| N                                                                                 |                                                                                                                                                                                                                                                                                                                                                                                                                                                                                                                                                                                                                                                                                                                                                                                                                                                                                                                                                                                                                                                                                                                                                                                                                                                                                                                                                                                                                                                                                | 262                                                                           |         |     |     |           |        |        |          |     |           |         |         |                    |          |      |                   |           |   |                                                                  |                                                                                                                                                                                                                                                                                                                                                                                                                                                                                                                                                                                                                                                                                                                                                                                                                                                                                                                                                                                                                                                                                                                  |                    |                               |      |      |                                                                                                                                                                                                                                                          |                    |      |                                                                                                                                                                                                                       |       |              |                     |      |                                               |                                                                                                                                                                                                                                                                                                                                                                                                                                                                                                                                                                                                                                                                                                                                                                                                                                                                                                                                                                                                                                                                                                                                                                                                                                                                                                                                                                                                                                                                                                                                                                                                                                                                                                                                                                                                                                                                                                                                                                                                                                                                                                                                                                                                                                     |  |       |                                               |      |                                               |            |     |                                                                                                                                                                        |              |      |                                                                                                                                                                                                                                                                                                                                                                                                                                                                                                                                                                                                                                                                                                                                                                                      |                                                                                                                                                              |              |                                                                                                                                                                                                                                                       |  |     |                                                           |  |       |                                                                                                                                                              |  |                   |                                                                   |  |           |          |  |                                                                                                                                                                                                                                                                                                                                                                                                                    |                                                                                                                                        |
| Age                                                                               | Mean (SD)                                                                                                                                                                                                                                                                                                                                                                                                                                                                                                                                                                                                                                                                                                                                                                                                                                                                                                                                                                                                                                                                                                                                                                                                                                                                                                                                                                                                                                                                      | 52(11)                                                                        |         |     |     |           |        |        |          |     |           |         |         |                    |          |      |                   |           |   |                                                                  |                                                                                                                                                                                                                                                                                                                                                                                                                                                                                                                                                                                                                                                                                                                                                                                                                                                                                                                                                                                                                                                                                                                  |                    |                               |      |      |                                                                                                                                                                                                                                                          |                    |      |                                                                                                                                                                                                                       |       |              |                     |      |                                               |                                                                                                                                                                                                                                                                                                                                                                                                                                                                                                                                                                                                                                                                                                                                                                                                                                                                                                                                                                                                                                                                                                                                                                                                                                                                                                                                                                                                                                                                                                                                                                                                                                                                                                                                                                                                                                                                                                                                                                                                                                                                                                                                                                                                                                     |  |       |                                               |      |                                               |            |     |                                                                                                                                                                        |              |      |                                                                                                                                                                                                                                                                                                                                                                                                                                                                                                                                                                                                                                                                                                                                                                                      |                                                                                                                                                              |              |                                                                                                                                                                                                                                                       |  |     |                                                           |  |       |                                                                                                                                                              |  |                   |                                                                   |  |           |          |  |                                                                                                                                                                                                                                                                                                                                                                                                                    |                                                                                                                                        |
| Gender                                                                            | Female %                                                                                                                                                                                                                                                                                                                                                                                                                                                                                                                                                                                                                                                                                                                                                                                                                                                                                                                                                                                                                                                                                                                                                                                                                                                                                                                                                                                                                                                                       | 63                                                                            |         |     |     |           |        |        |          |     |           |         |         |                    |          |      |                   |           |   |                                                                  |                                                                                                                                                                                                                                                                                                                                                                                                                                                                                                                                                                                                                                                                                                                                                                                                                                                                                                                                                                                                                                                                                                                  |                    |                               |      |      |                                                                                                                                                                                                                                                          |                    |      |                                                                                                                                                                                                                       |       |              |                     |      |                                               |                                                                                                                                                                                                                                                                                                                                                                                                                                                                                                                                                                                                                                                                                                                                                                                                                                                                                                                                                                                                                                                                                                                                                                                                                                                                                                                                                                                                                                                                                                                                                                                                                                                                                                                                                                                                                                                                                                                                                                                                                                                                                                                                                                                                                                     |  |       |                                               |      |                                               |            |     |                                                                                                                                                                        |              |      |                                                                                                                                                                                                                                                                                                                                                                                                                                                                                                                                                                                                                                                                                                                                                                                      |                                                                                                                                                              |              |                                                                                                                                                                                                                                                       |  |     |                                                           |  |       |                                                                                                                                                              |  |                   |                                                                   |  |           |          |  |                                                                                                                                                                                                                                                                                                                                                                                                                    |                                                                                                                                        |
| Ethnicity                                                                         | -                                                                                                                                                                                                                                                                                                                                                                                                                                                                                                                                                                                                                                                                                                                                                                                                                                                                                                                                                                                                                                                                                                                                                                                                                                                                                                                                                                                                                                                                              | -                                                                             |         |     |     |           |        |        |          |     |           |         |         |                    |          |      |                   |           |   |                                                                  |                                                                                                                                                                                                                                                                                                                                                                                                                                                                                                                                                                                                                                                                                                                                                                                                                                                                                                                                                                                                                                                                                                                  |                    |                               |      |      |                                                                                                                                                                                                                                                          |                    |      |                                                                                                                                                                                                                       |       |              |                     |      |                                               |                                                                                                                                                                                                                                                                                                                                                                                                                                                                                                                                                                                                                                                                                                                                                                                                                                                                                                                                                                                                                                                                                                                                                                                                                                                                                                                                                                                                                                                                                                                                                                                                                                                                                                                                                                                                                                                                                                                                                                                                                                                                                                                                                                                                                                     |  |       |                                               |      |                                               |            |     |                                                                                                                                                                        |              |      |                                                                                                                                                                                                                                                                                                                                                                                                                                                                                                                                                                                                                                                                                                                                                                                      |                                                                                                                                                              |              |                                                                                                                                                                                                                                                       |  |     |                                                           |  |       |                                                                                                                                                              |  |                   |                                                                   |  |           |          |  |                                                                                                                                                                                                                                                                                                                                                                                                                    |                                                                                                                                        |
| Living arrangement                                                                | -                                                                                                                                                                                                                                                                                                                                                                                                                                                                                                                                                                                                                                                                                                                                                                                                                                                                                                                                                                                                                                                                                                                                                                                                                                                                                                                                                                                                                                                                              | -                                                                             |         |     |     |           |        |        |          |     |           |         |         |                    |          |      |                   |           |   |                                                                  |                                                                                                                                                                                                                                                                                                                                                                                                                                                                                                                                                                                                                                                                                                                                                                                                                                                                                                                                                                                                                                                                                                                  |                    |                               |      |      |                                                                                                                                                                                                                                                          |                    |      |                                                                                                                                                                                                                       |       |              |                     |      |                                               |                                                                                                                                                                                                                                                                                                                                                                                                                                                                                                                                                                                                                                                                                                                                                                                                                                                                                                                                                                                                                                                                                                                                                                                                                                                                                                                                                                                                                                                                                                                                                                                                                                                                                                                                                                                                                                                                                                                                                                                                                                                                                                                                                                                                                                     |  |       |                                               |      |                                               |            |     |                                                                                                                                                                        |              |      |                                                                                                                                                                                                                                                                                                                                                                                                                                                                                                                                                                                                                                                                                                                                                                                      |                                                                                                                                                              |              |                                                                                                                                                                                                                                                       |  |     |                                                           |  |       |                                                                                                                                                              |  |                   |                                                                   |  |           |          |  |                                                                                                                                                                                                                                                                                                                                                                                                                    |                                                                                                                                        |
| Employment status                                                                 | -                                                                                                                                                                                                                                                                                                                                                                                                                                                                                                                                                                                                                                                                                                                                                                                                                                                                                                                                                                                                                                                                                                                                                                                                                                                                                                                                                                                                                                                                              | -                                                                             |         |     |     |           |        |        |          |     |           |         |         |                    |          |      |                   |           |   |                                                                  |                                                                                                                                                                                                                                                                                                                                                                                                                                                                                                                                                                                                                                                                                                                                                                                                                                                                                                                                                                                                                                                                                                                  |                    |                               |      |      |                                                                                                                                                                                                                                                          |                    |      |                                                                                                                                                                                                                       |       |              |                     |      |                                               |                                                                                                                                                                                                                                                                                                                                                                                                                                                                                                                                                                                                                                                                                                                                                                                                                                                                                                                                                                                                                                                                                                                                                                                                                                                                                                                                                                                                                                                                                                                                                                                                                                                                                                                                                                                                                                                                                                                                                                                                                                                                                                                                                                                                                                     |  |       |                                               |      |                                               |            |     |                                                                                                                                                                        |              |      |                                                                                                                                                                                                                                                                                                                                                                                                                                                                                                                                                                                                                                                                                                                                                                                      |                                                                                                                                                              |              |                                                                                                                                                                                                                                                       |  |     |                                                           |  |       |                                                                                                                                                              |  |                   |                                                                   |  |           |          |  |                                                                                                                                                                                                                                                                                                                                                                                                                    |                                                                                                                                        |
| Name                                                                              | Social prescribing initiative                                                                                                                                                                                                                                                                                                                                                                                                                                                                                                                                                                                                                                                                                                                                                                                                                                                                                                                                                                                                                                                                                                                                                                                                                                                                                                                                                                                                                                                  |                                                                               |         |     |     |           |        |        |          |     |           |         |         |                    |          |      |                   |           |   |                                                                  |                                                                                                                                                                                                                                                                                                                                                                                                                                                                                                                                                                                                                                                                                                                                                                                                                                                                                                                                                                                                                                                                                                                  |                    |                               |      |      |                                                                                                                                                                                                                                                          |                    |      |                                                                                                                                                                                                                       |       |              |                     |      |                                               |                                                                                                                                                                                                                                                                                                                                                                                                                                                                                                                                                                                                                                                                                                                                                                                                                                                                                                                                                                                                                                                                                                                                                                                                                                                                                                                                                                                                                                                                                                                                                                                                                                                                                                                                                                                                                                                                                                                                                                                                                                                                                                                                                                                                                                     |  |       |                                               |      |                                               |            |     |                                                                                                                                                                        |              |      |                                                                                                                                                                                                                                                                                                                                                                                                                                                                                                                                                                                                                                                                                                                                                                                      |                                                                                                                                                              |              |                                                                                                                                                                                                                                                       |  |     |                                                           |  |       |                                                                                                                                                              |  |                   |                                                                   |  |           |          |  |                                                                                                                                                                                                                                                                                                                                                                                                                    |                                                                                                                                        |
| Why                                                                               | Social Prescribing may be of particular benefit to isolated, marginalised and vulnerable social groups including people with mild to moderate mental health problems by addressing some of the consequences of social, economic and health inequalities.                                                                                                                                                                                                                                                                                                                                                                                                                                                                                                                                                                                                                                                                                                                                                                                                                                                                                                                                                                                                                                                                                                                                                                                                                       |                                                                               |         |     |     |           |        |        |          |     |           |         |         |                    |          |      |                   |           |   |                                                                  |                                                                                                                                                                                                                                                                                                                                                                                                                                                                                                                                                                                                                                                                                                                                                                                                                                                                                                                                                                                                                                                                                                                  |                    |                               |      |      |                                                                                                                                                                                                                                                          |                    |      |                                                                                                                                                                                                                       |       |              |                     |      |                                               |                                                                                                                                                                                                                                                                                                                                                                                                                                                                                                                                                                                                                                                                                                                                                                                                                                                                                                                                                                                                                                                                                                                                                                                                                                                                                                                                                                                                                                                                                                                                                                                                                                                                                                                                                                                                                                                                                                                                                                                                                                                                                                                                                                                                                                     |  |       |                                               |      |                                               |            |     |                                                                                                                                                                        |              |      |                                                                                                                                                                                                                                                                                                                                                                                                                                                                                                                                                                                                                                                                                                                                                                                      |                                                                                                                                                              |              |                                                                                                                                                                                                                                                       |  |     |                                                           |  |       |                                                                                                                                                              |  |                   |                                                                   |  |           |          |  |                                                                                                                                                                                                                                                                                                                                                                                                                    |                                                                                                                                        |
| What                                                                              | Referral through secondary care or self-referral. A series of free courses were offered to clients with mild to moderate mental health difficulties. Participants could then self-refer to a class of their choosing.                                                                                                                                                                                                                                                                                                                                                                                                                                                                                                                                                                                                                                                                                                                                                                                                                                                                                                                                                                                                                                                                                                                                                                                                                                                          |                                                                               |         |     |     |           |        |        |          |     |           |         |         |                    |          |      |                   |           |   |                                                                  |                                                                                                                                                                                                                                                                                                                                                                                                                                                                                                                                                                                                                                                                                                                                                                                                                                                                                                                                                                                                                                                                                                                  |                    |                               |      |      |                                                                                                                                                                                                                                                          |                    |      |                                                                                                                                                                                                                       |       |              |                     |      |                                               |                                                                                                                                                                                                                                                                                                                                                                                                                                                                                                                                                                                                                                                                                                                                                                                                                                                                                                                                                                                                                                                                                                                                                                                                                                                                                                                                                                                                                                                                                                                                                                                                                                                                                                                                                                                                                                                                                                                                                                                                                                                                                                                                                                                                                                     |  |       |                                               |      |                                               |            |     |                                                                                                                                                                        |              |      |                                                                                                                                                                                                                                                                                                                                                                                                                                                                                                                                                                                                                                                                                                                                                                                      |                                                                                                                                                              |              |                                                                                                                                                                                                                                                       |  |     |                                                           |  |       |                                                                                                                                                              |  |                   |                                                                   |  |           |          |  |                                                                                                                                                                                                                                                                                                                                                                                                                    |                                                                                                                                        |
| Who provided                                                                      | Fife Cultural trust                                                                                                                                                                                                                                                                                                                                                                                                                                                                                                                                                                                                                                                                                                                                                                                                                                                                                                                                                                                                                                                                                                                                                                                                                                                                                                                                                                                                                                                            |                                                                               |         |     |     |           |        |        |          |     |           |         |         |                    |          |      |                   |           |   |                                                                  |                                                                                                                                                                                                                                                                                                                                                                                                                                                                                                                                                                                                                                                                                                                                                                                                                                                                                                                                                                                                                                                                                                                  |                    |                               |      |      |                                                                                                                                                                                                                                                          |                    |      |                                                                                                                                                                                                                       |       |              |                     |      |                                               |                                                                                                                                                                                                                                                                                                                                                                                                                                                                                                                                                                                                                                                                                                                                                                                                                                                                                                                                                                                                                                                                                                                                                                                                                                                                                                                                                                                                                                                                                                                                                                                                                                                                                                                                                                                                                                                                                                                                                                                                                                                                                                                                                                                                                                     |  |       |                                               |      |                                               |            |     |                                                                                                                                                                        |              |      |                                                                                                                                                                                                                                                                                                                                                                                                                                                                                                                                                                                                                                                                                                                                                                                      |                                                                                                                                                              |              |                                                                                                                                                                                                                                                       |  |     |                                                           |  |       |                                                                                                                                                              |  |                   |                                                                   |  |           |          |  |                                                                                                                                                                                                                                                                                                                                                                                                                    |                                                                                                                                        |
| How                                                                               | -                                                                                                                                                                                                                                                                                                                                                                                                                                                                                                                                                                                                                                                                                                                                                                                                                                                                                                                                                                                                                                                                                                                                                                                                                                                                                                                                                                                                                                                                              |                                                                               |         |     |     |           |        |        |          |     |           |         |         |                    |          |      |                   |           |   |                                                                  |                                                                                                                                                                                                                                                                                                                                                                                                                                                                                                                                                                                                                                                                                                                                                                                                                                                                                                                                                                                                                                                                                                                  |                    |                               |      |      |                                                                                                                                                                                                                                                          |                    |      |                                                                                                                                                                                                                       |       |              |                     |      |                                               |                                                                                                                                                                                                                                                                                                                                                                                                                                                                                                                                                                                                                                                                                                                                                                                                                                                                                                                                                                                                                                                                                                                                                                                                                                                                                                                                                                                                                                                                                                                                                                                                                                                                                                                                                                                                                                                                                                                                                                                                                                                                                                                                                                                                                                     |  |       |                                               |      |                                               |            |     |                                                                                                                                                                        |              |      |                                                                                                                                                                                                                                                                                                                                                                                                                                                                                                                                                                                                                                                                                                                                                                                      |                                                                                                                                                              |              |                                                                                                                                                                                                                                                       |  |     |                                                           |  |       |                                                                                                                                                              |  |                   |                                                                   |  |           |          |  |                                                                                                                                                                                                                                                                                                                                                                                                                    |                                                                                                                                        |
| Where                                                                             | Courses were delivered by Fife Cultural Trust                                                                                                                                                                                                                                                                                                                                                                                                                                                                                                                                                                                                                                                                                                                                                                                                                                                                                                                                                                                                                                                                                                                                                                                                                                                                                                                                                                                                                                  |                                                                               |         |     |     |           |        |        |          |     |           |         |         |                    |          |      |                   |           |   |                                                                  |                                                                                                                                                                                                                                                                                                                                                                                                                                                                                                                                                                                                                                                                                                                                                                                                                                                                                                                                                                                                                                                                                                                  |                    |                               |      |      |                                                                                                                                                                                                                                                          |                    |      |                                                                                                                                                                                                                       |       |              |                     |      |                                               |                                                                                                                                                                                                                                                                                                                                                                                                                                                                                                                                                                                                                                                                                                                                                                                                                                                                                                                                                                                                                                                                                                                                                                                                                                                                                                                                                                                                                                                                                                                                                                                                                                                                                                                                                                                                                                                                                                                                                                                                                                                                                                                                                                                                                                     |  |       |                                               |      |                                               |            |     |                                                                                                                                                                        |              |      |                                                                                                                                                                                                                                                                                                                                                                                                                                                                                                                                                                                                                                                                                                                                                                                      |                                                                                                                                                              |              |                                                                                                                                                                                                                                                       |  |     |                                                           |  |       |                                                                                                                                                              |  |                   |                                                                   |  |           |          |  |                                                                                                                                                                                                                                                                                                                                                                                                                    |                                                                                                                                        |
| When and How Much                                                                 | -                                                                                                                                                                                                                                                                                                                                                                                                                                                                                                                                                                                                                                                                                                                                                                                                                                                                                                                                                                                                                                                                                                                                                                                                                                                                                                                                                                                                                                                                              |                                                                               |         |     |     |           |        |        |          |     |           |         |         |                    |          |      |                   |           |   |                                                                  |                                                                                                                                                                                                                                                                                                                                                                                                                                                                                                                                                                                                                                                                                                                                                                                                                                                                                                                                                                                                                                                                                                                  |                    |                               |      |      |                                                                                                                                                                                                                                                          |                    |      |                                                                                                                                                                                                                       |       |              |                     |      |                                               |                                                                                                                                                                                                                                                                                                                                                                                                                                                                                                                                                                                                                                                                                                                                                                                                                                                                                                                                                                                                                                                                                                                                                                                                                                                                                                                                                                                                                                                                                                                                                                                                                                                                                                                                                                                                                                                                                                                                                                                                                                                                                                                                                                                                                                     |  |       |                                               |      |                                               |            |     |                                                                                                                                                                        |              |      |                                                                                                                                                                                                                                                                                                                                                                                                                                                                                                                                                                                                                                                                                                                                                                                      |                                                                                                                                                              |              |                                                                                                                                                                                                                                                       |  |     |                                                           |  |       |                                                                                                                                                              |  |                   |                                                                   |  |           |          |  |                                                                                                                                                                                                                                                                                                                                                                                                                    |                                                                                                                                        |
| Tailoring                                                                         | Personalized                                                                                                                                                                                                                                                                                                                                                                                                                                                                                                                                                                                                                                                                                                                                                                                                                                                                                                                                                                                                                                                                                                                                                                                                                                                                                                                                                                                                                                                                   |                                                                               |         |     |     |           |        |        |          |     |           |         |         |                    |          |      |                   |           |   |                                                                  |                                                                                                                                                                                                                                                                                                                                                                                                                                                                                                                                                                                                                                                                                                                                                                                                                                                                                                                                                                                                                                                                                                                  |                    |                               |      |      |                                                                                                                                                                                                                                                          |                    |      |                                                                                                                                                                                                                       |       |              |                     |      |                                               |                                                                                                                                                                                                                                                                                                                                                                                                                                                                                                                                                                                                                                                                                                                                                                                                                                                                                                                                                                                                                                                                                                                                                                                                                                                                                                                                                                                                                                                                                                                                                                                                                                                                                                                                                                                                                                                                                                                                                                                                                                                                                                                                                                                                                                     |  |       |                                               |      |                                               |            |     |                                                                                                                                                                        |              |      |                                                                                                                                                                                                                                                                                                                                                                                                                                                                                                                                                                                                                                                                                                                                                                                      |                                                                                                                                                              |              |                                                                                                                                                                                                                                                       |  |     |                                                           |  |       |                                                                                                                                                              |  |                   |                                                                   |  |           |          |  |                                                                                                                                                                                                                                                                                                                                                                                                                    |                                                                                                                                        |

|                       |                                                                                                                                                                                                                                                                                                                                                                                                                                                                                                                                                                                                                                   |                                                                                                                                                                                                                                                                                                                                                                                                                                                                                                                                                                                                                                                                                                                                                                                                                                                                                                                                                                                                                                                                                                                                                                                                                                                                                                                    |       |                                          |     |                                                                                   |                                                                                                                                                                                                                                                                                                                                                                                                                                                                                                                                                                                                                                                                                                                                                                                                 |            |                                    |          |                                                                                                                                                                                                                                                                                                                                                                        |           |                                                                                                                                                                                                                                              |                                                                                                                                                                                                                                                                                                                                                                                                                                                                 |                                                                                                                              |   |   |                   |   |   |       |                                                              |    |                                                                                                     |                                                                                                                                                                                                                                                                                                                                                                                                                                                                                                                                                                                                                                                                                                                                                                                                                                                                                                                                                                                                                                                                                                                                                                                                                                                                                                                                                                                                                                                                                                                                                                                                                                                                                                                                                                                                                                                                                                                                                                                                                                  |      |                              |     |                                                                                                                                                                                                                                                                                                                    |      |                                                                                                                                                                                                                                                                                                                                                                                                                                    |              |                                    |     |              |       |                                                                                                                                |                   |   |               |                                                                                                                                                                                                                                                                                                                                                                                                                                                                                                                                                                                                                                   |           |              |                                                                                                                                                                                                                                                                                                                                                                                                                                                                                 |                                                                                                                                                                         |
|-----------------------|-----------------------------------------------------------------------------------------------------------------------------------------------------------------------------------------------------------------------------------------------------------------------------------------------------------------------------------------------------------------------------------------------------------------------------------------------------------------------------------------------------------------------------------------------------------------------------------------------------------------------------------|--------------------------------------------------------------------------------------------------------------------------------------------------------------------------------------------------------------------------------------------------------------------------------------------------------------------------------------------------------------------------------------------------------------------------------------------------------------------------------------------------------------------------------------------------------------------------------------------------------------------------------------------------------------------------------------------------------------------------------------------------------------------------------------------------------------------------------------------------------------------------------------------------------------------------------------------------------------------------------------------------------------------------------------------------------------------------------------------------------------------------------------------------------------------------------------------------------------------------------------------------------------------------------------------------------------------|-------|------------------------------------------|-----|-----------------------------------------------------------------------------------|-------------------------------------------------------------------------------------------------------------------------------------------------------------------------------------------------------------------------------------------------------------------------------------------------------------------------------------------------------------------------------------------------------------------------------------------------------------------------------------------------------------------------------------------------------------------------------------------------------------------------------------------------------------------------------------------------------------------------------------------------------------------------------------------------|------------|------------------------------------|----------|------------------------------------------------------------------------------------------------------------------------------------------------------------------------------------------------------------------------------------------------------------------------------------------------------------------------------------------------------------------------|-----------|----------------------------------------------------------------------------------------------------------------------------------------------------------------------------------------------------------------------------------------------|-----------------------------------------------------------------------------------------------------------------------------------------------------------------------------------------------------------------------------------------------------------------------------------------------------------------------------------------------------------------------------------------------------------------------------------------------------------------|------------------------------------------------------------------------------------------------------------------------------|---|---|-------------------|---|---|-------|--------------------------------------------------------------|----|-----------------------------------------------------------------------------------------------------|----------------------------------------------------------------------------------------------------------------------------------------------------------------------------------------------------------------------------------------------------------------------------------------------------------------------------------------------------------------------------------------------------------------------------------------------------------------------------------------------------------------------------------------------------------------------------------------------------------------------------------------------------------------------------------------------------------------------------------------------------------------------------------------------------------------------------------------------------------------------------------------------------------------------------------------------------------------------------------------------------------------------------------------------------------------------------------------------------------------------------------------------------------------------------------------------------------------------------------------------------------------------------------------------------------------------------------------------------------------------------------------------------------------------------------------------------------------------------------------------------------------------------------------------------------------------------------------------------------------------------------------------------------------------------------------------------------------------------------------------------------------------------------------------------------------------------------------------------------------------------------------------------------------------------------------------------------------------------------------------------------------------------------|------|------------------------------|-----|--------------------------------------------------------------------------------------------------------------------------------------------------------------------------------------------------------------------------------------------------------------------------------------------------------------------|------|------------------------------------------------------------------------------------------------------------------------------------------------------------------------------------------------------------------------------------------------------------------------------------------------------------------------------------------------------------------------------------------------------------------------------------|--------------|------------------------------------|-----|--------------|-------|--------------------------------------------------------------------------------------------------------------------------------|-------------------|---|---------------|-----------------------------------------------------------------------------------------------------------------------------------------------------------------------------------------------------------------------------------------------------------------------------------------------------------------------------------------------------------------------------------------------------------------------------------------------------------------------------------------------------------------------------------------------------------------------------------------------------------------------------------|-----------|--------------|---------------------------------------------------------------------------------------------------------------------------------------------------------------------------------------------------------------------------------------------------------------------------------------------------------------------------------------------------------------------------------------------------------------------------------------------------------------------------------|-------------------------------------------------------------------------------------------------------------------------------------------------------------------------|
|                       |                                                                                                                                                                                                                                                                                                                                                                                                                                                                                                                                                                                                                                   | <table border="1"> <tr> <td>Other</td> <td>Attending a psychologist or counsellor %</td> <td>34</td> </tr> </table> <p>Population: Special (mental health issues)</p>                                                                                                                                                                                                                                                                                                                                                                                                                                                                                                                                                                                                                                                                                                                                                                                                                                                                                                                                                                                                                                                                                                                                              | Other | Attending a psychologist or counsellor % | 34  |                                                                                   |                                                                                                                                                                                                                                                                                                                                                                                                                                                                                                                                                                                                                                                                                                                                                                                                 |            |                                    |          |                                                                                                                                                                                                                                                                                                                                                                        |           |                                                                                                                                                                                                                                              |                                                                                                                                                                                                                                                                                                                                                                                                                                                                 |                                                                                                                              |   |   |                   |   |   |       |                                                              |    |                                                                                                     |                                                                                                                                                                                                                                                                                                                                                                                                                                                                                                                                                                                                                                                                                                                                                                                                                                                                                                                                                                                                                                                                                                                                                                                                                                                                                                                                                                                                                                                                                                                                                                                                                                                                                                                                                                                                                                                                                                                                                                                                                                  |      |                              |     |                                                                                                                                                                                                                                                                                                                    |      |                                                                                                                                                                                                                                                                                                                                                                                                                                    |              |                                    |     |              |       |                                                                                                                                |                   |   |               |                                                                                                                                                                                                                                                                                                                                                                                                                                                                                                                                                                                                                                   |           |              |                                                                                                                                                                                                                                                                                                                                                                                                                                                                                 |                                                                                                                                                                         |
| Other                 | Attending a psychologist or counsellor %                                                                                                                                                                                                                                                                                                                                                                                                                                                                                                                                                                                          | 34                                                                                                                                                                                                                                                                                                                                                                                                                                                                                                                                                                                                                                                                                                                                                                                                                                                                                                                                                                                                                                                                                                                                                                                                                                                                                                                 |       |                                          |     |                                                                                   |                                                                                                                                                                                                                                                                                                                                                                                                                                                                                                                                                                                                                                                                                                                                                                                                 |            |                                    |          |                                                                                                                                                                                                                                                                                                                                                                        |           |                                                                                                                                                                                                                                              |                                                                                                                                                                                                                                                                                                                                                                                                                                                                 |                                                                                                                              |   |   |                   |   |   |       |                                                              |    |                                                                                                     |                                                                                                                                                                                                                                                                                                                                                                                                                                                                                                                                                                                                                                                                                                                                                                                                                                                                                                                                                                                                                                                                                                                                                                                                                                                                                                                                                                                                                                                                                                                                                                                                                                                                                                                                                                                                                                                                                                                                                                                                                                  |      |                              |     |                                                                                                                                                                                                                                                                                                                    |      |                                                                                                                                                                                                                                                                                                                                                                                                                                    |              |                                    |     |              |       |                                                                                                                                |                   |   |               |                                                                                                                                                                                                                                                                                                                                                                                                                                                                                                                                                                                                                                   |           |              |                                                                                                                                                                                                                                                                                                                                                                                                                                                                                 |                                                                                                                                                                         |
| Palmer 2017 (81)      | <p>Uncontrolled before-and-after study, mixed-methods</p> <p>Study length: -</p>                                                                                                                                                                                                                                                                                                                                                                                                                                                                                                                                                  | <p><b>Inclusion criteria:</b></p> <p>All participants must have satisfied two or more of the following criteria:</p> <ul style="list-style-type: none"> <li>- Aged 18+ years</li> <li>- Socially isolated (i.e. seeing friends or family less than once a week)</li> <li>- A frequent user of primary care services or A&amp;E</li> <li>- Struggling to manage a significant life change</li> <li>- Struggling to manage their health conditions</li> <li>- or a carer for somebody else with a long term condition.</li> </ul> <p><b>Exclusion criteria:</b></p> <ul style="list-style-type: none"> <li>- Active suicidal ideas</li> <li>- A current or lifetime diagnosis of psychosis, personality disorder or organic mental disorder</li> </ul> <p>Baseline characteristics:</p> <table border="1"> <tr> <td>N</td> <td></td> <td>245</td> </tr> <tr> <td>Age</td> <td>Mean Age (Range)</td> <td>77 (29-93)</td> </tr> <tr> <td>Gender</td> <td>Female %</td> <td>69</td> </tr> <tr> <td>Ethnicity</td> <td>-</td> <td>-</td> </tr> <tr> <td>Living arrangement</td> <td>-</td> <td>-</td> </tr> <tr> <td>Employment status</td> <td>-</td> <td>-</td> </tr> <tr> <td>Other</td> <td>Referral reason<br/>Struggling with significant life change %</td> <td>63</td> </tr> </table> <p>Population: General</p> | N     |                                          | 245 | Age                                                                               | Mean Age (Range)                                                                                                                                                                                                                                                                                                                                                                                                                                                                                                                                                                                                                                                                                                                                                                                | 77 (29-93) | Gender                             | Female % | 69                                                                                                                                                                                                                                                                                                                                                                     | Ethnicity | -                                                                                                                                                                                                                                            | -                                                                                                                                                                                                                                                                                                                                                                                                                                                               | Living arrangement                                                                                                           | - | - | Employment status | - | - | Other | Referral reason<br>Struggling with significant life change % | 63 | <p>Primary Care</p> <p>Country:<br/>UK (London Borough of Bexley, South-eastern Greater London)</p> | <table border="1"> <tr> <td>Name</td> <td>Social Prescribing in Bexley</td> </tr> <tr> <td>Why</td> <td>Develop collaborative working with community groups and move away from a reactive, disease focused, fragmented model of care towards one that is more proactive, holistic and preventative, in which voluntary sector organisations and residents are encouraged to play a greater role in managing care provision</td> </tr> <tr> <td>What</td> <td>Provides a mix of formal referring and informal signposting according to individual need. Coordinator has access to a range of voluntary and community services and activities who have signed up to be part of the initiative. Additional voluntary and community services which had not formally signed up to the programme were identified by the coordinator, and formed the basis of informal signposting, where appropriate.</td> </tr> <tr> <td>Who provided</td> <td>One social prescribing coordinator</td> </tr> <tr> <td>How</td> <td>Face-to-face</td> </tr> <tr> <td>Where</td> <td>Coordinator meets clients at a mutually beneficial location, which includes home visits, GP surgeries, and community locations</td> </tr> <tr> <td>When and How Much</td> <td>-</td> </tr> <tr> <td>Modifications</td> <td>The pilot included nine GP surgeries, and was initially aimed at clients who were 65 years and over. After the initial three months, the eligibility criteria was widened to include those aged 18 years and over and also included the opportunity for individuals to self-refer. Following a mid-programme review of the pilot, the coordinator identified a barrier to the service; namely that some clients found it difficult to attend the social prescribing assessments at GP surgeries primarily due to mobility. As a result, home visits and assessments in community locations were included at the assessment stage.</td> </tr> <tr> <td>Tailoring</td> <td>Personalized</td> </tr> </table> <p>Intervention: Holistic</p> | Name | Social Prescribing in Bexley | Why | Develop collaborative working with community groups and move away from a reactive, disease focused, fragmented model of care towards one that is more proactive, holistic and preventative, in which voluntary sector organisations and residents are encouraged to play a greater role in managing care provision | What | Provides a mix of formal referring and informal signposting according to individual need. Coordinator has access to a range of voluntary and community services and activities who have signed up to be part of the initiative. Additional voluntary and community services which had not formally signed up to the programme were identified by the coordinator, and formed the basis of informal signposting, where appropriate. | Who provided | One social prescribing coordinator | How | Face-to-face | Where | Coordinator meets clients at a mutually beneficial location, which includes home visits, GP surgeries, and community locations | When and How Much | - | Modifications | The pilot included nine GP surgeries, and was initially aimed at clients who were 65 years and over. After the initial three months, the eligibility criteria was widened to include those aged 18 years and over and also included the opportunity for individuals to self-refer. Following a mid-programme review of the pilot, the coordinator identified a barrier to the service; namely that some clients found it difficult to attend the social prescribing assessments at GP surgeries primarily due to mobility. As a result, home visits and assessments in community locations were included at the assessment stage. | Tailoring | Personalized | <p>Patient outcome 6 months before and after referral to social prescribing:</p> <ul style="list-style-type: none"> <li>- Warwick Edinburgh Mental Wellbeing Scale</li> </ul> <p>Process of care measures 6 months before and after referral to social prescribing:</p> <ul style="list-style-type: none"> <li>- A&amp;E visits</li> <li>- Length of hospital stay</li> <li>- London ambulance service calls</li> <li>- GP visits</li> <li>- Non-elective admissions</li> </ul> | <p>Peer-Review: No</p> <p>Funding source: Bexley Clinical Commissioning Group (CCG) and the London Borough of Bexley</p> <p>Declarations of interest: None declared</p> |
| N                     |                                                                                                                                                                                                                                                                                                                                                                                                                                                                                                                                                                                                                                   | 245                                                                                                                                                                                                                                                                                                                                                                                                                                                                                                                                                                                                                                                                                                                                                                                                                                                                                                                                                                                                                                                                                                                                                                                                                                                                                                                |       |                                          |     |                                                                                   |                                                                                                                                                                                                                                                                                                                                                                                                                                                                                                                                                                                                                                                                                                                                                                                                 |            |                                    |          |                                                                                                                                                                                                                                                                                                                                                                        |           |                                                                                                                                                                                                                                              |                                                                                                                                                                                                                                                                                                                                                                                                                                                                 |                                                                                                                              |   |   |                   |   |   |       |                                                              |    |                                                                                                     |                                                                                                                                                                                                                                                                                                                                                                                                                                                                                                                                                                                                                                                                                                                                                                                                                                                                                                                                                                                                                                                                                                                                                                                                                                                                                                                                                                                                                                                                                                                                                                                                                                                                                                                                                                                                                                                                                                                                                                                                                                  |      |                              |     |                                                                                                                                                                                                                                                                                                                    |      |                                                                                                                                                                                                                                                                                                                                                                                                                                    |              |                                    |     |              |       |                                                                                                                                |                   |   |               |                                                                                                                                                                                                                                                                                                                                                                                                                                                                                                                                                                                                                                   |           |              |                                                                                                                                                                                                                                                                                                                                                                                                                                                                                 |                                                                                                                                                                         |
| Age                   | Mean Age (Range)                                                                                                                                                                                                                                                                                                                                                                                                                                                                                                                                                                                                                  | 77 (29-93)                                                                                                                                                                                                                                                                                                                                                                                                                                                                                                                                                                                                                                                                                                                                                                                                                                                                                                                                                                                                                                                                                                                                                                                                                                                                                                         |       |                                          |     |                                                                                   |                                                                                                                                                                                                                                                                                                                                                                                                                                                                                                                                                                                                                                                                                                                                                                                                 |            |                                    |          |                                                                                                                                                                                                                                                                                                                                                                        |           |                                                                                                                                                                                                                                              |                                                                                                                                                                                                                                                                                                                                                                                                                                                                 |                                                                                                                              |   |   |                   |   |   |       |                                                              |    |                                                                                                     |                                                                                                                                                                                                                                                                                                                                                                                                                                                                                                                                                                                                                                                                                                                                                                                                                                                                                                                                                                                                                                                                                                                                                                                                                                                                                                                                                                                                                                                                                                                                                                                                                                                                                                                                                                                                                                                                                                                                                                                                                                  |      |                              |     |                                                                                                                                                                                                                                                                                                                    |      |                                                                                                                                                                                                                                                                                                                                                                                                                                    |              |                                    |     |              |       |                                                                                                                                |                   |   |               |                                                                                                                                                                                                                                                                                                                                                                                                                                                                                                                                                                                                                                   |           |              |                                                                                                                                                                                                                                                                                                                                                                                                                                                                                 |                                                                                                                                                                         |
| Gender                | Female %                                                                                                                                                                                                                                                                                                                                                                                                                                                                                                                                                                                                                          | 69                                                                                                                                                                                                                                                                                                                                                                                                                                                                                                                                                                                                                                                                                                                                                                                                                                                                                                                                                                                                                                                                                                                                                                                                                                                                                                                 |       |                                          |     |                                                                                   |                                                                                                                                                                                                                                                                                                                                                                                                                                                                                                                                                                                                                                                                                                                                                                                                 |            |                                    |          |                                                                                                                                                                                                                                                                                                                                                                        |           |                                                                                                                                                                                                                                              |                                                                                                                                                                                                                                                                                                                                                                                                                                                                 |                                                                                                                              |   |   |                   |   |   |       |                                                              |    |                                                                                                     |                                                                                                                                                                                                                                                                                                                                                                                                                                                                                                                                                                                                                                                                                                                                                                                                                                                                                                                                                                                                                                                                                                                                                                                                                                                                                                                                                                                                                                                                                                                                                                                                                                                                                                                                                                                                                                                                                                                                                                                                                                  |      |                              |     |                                                                                                                                                                                                                                                                                                                    |      |                                                                                                                                                                                                                                                                                                                                                                                                                                    |              |                                    |     |              |       |                                                                                                                                |                   |   |               |                                                                                                                                                                                                                                                                                                                                                                                                                                                                                                                                                                                                                                   |           |              |                                                                                                                                                                                                                                                                                                                                                                                                                                                                                 |                                                                                                                                                                         |
| Ethnicity             | -                                                                                                                                                                                                                                                                                                                                                                                                                                                                                                                                                                                                                                 | -                                                                                                                                                                                                                                                                                                                                                                                                                                                                                                                                                                                                                                                                                                                                                                                                                                                                                                                                                                                                                                                                                                                                                                                                                                                                                                                  |       |                                          |     |                                                                                   |                                                                                                                                                                                                                                                                                                                                                                                                                                                                                                                                                                                                                                                                                                                                                                                                 |            |                                    |          |                                                                                                                                                                                                                                                                                                                                                                        |           |                                                                                                                                                                                                                                              |                                                                                                                                                                                                                                                                                                                                                                                                                                                                 |                                                                                                                              |   |   |                   |   |   |       |                                                              |    |                                                                                                     |                                                                                                                                                                                                                                                                                                                                                                                                                                                                                                                                                                                                                                                                                                                                                                                                                                                                                                                                                                                                                                                                                                                                                                                                                                                                                                                                                                                                                                                                                                                                                                                                                                                                                                                                                                                                                                                                                                                                                                                                                                  |      |                              |     |                                                                                                                                                                                                                                                                                                                    |      |                                                                                                                                                                                                                                                                                                                                                                                                                                    |              |                                    |     |              |       |                                                                                                                                |                   |   |               |                                                                                                                                                                                                                                                                                                                                                                                                                                                                                                                                                                                                                                   |           |              |                                                                                                                                                                                                                                                                                                                                                                                                                                                                                 |                                                                                                                                                                         |
| Living arrangement    | -                                                                                                                                                                                                                                                                                                                                                                                                                                                                                                                                                                                                                                 | -                                                                                                                                                                                                                                                                                                                                                                                                                                                                                                                                                                                                                                                                                                                                                                                                                                                                                                                                                                                                                                                                                                                                                                                                                                                                                                                  |       |                                          |     |                                                                                   |                                                                                                                                                                                                                                                                                                                                                                                                                                                                                                                                                                                                                                                                                                                                                                                                 |            |                                    |          |                                                                                                                                                                                                                                                                                                                                                                        |           |                                                                                                                                                                                                                                              |                                                                                                                                                                                                                                                                                                                                                                                                                                                                 |                                                                                                                              |   |   |                   |   |   |       |                                                              |    |                                                                                                     |                                                                                                                                                                                                                                                                                                                                                                                                                                                                                                                                                                                                                                                                                                                                                                                                                                                                                                                                                                                                                                                                                                                                                                                                                                                                                                                                                                                                                                                                                                                                                                                                                                                                                                                                                                                                                                                                                                                                                                                                                                  |      |                              |     |                                                                                                                                                                                                                                                                                                                    |      |                                                                                                                                                                                                                                                                                                                                                                                                                                    |              |                                    |     |              |       |                                                                                                                                |                   |   |               |                                                                                                                                                                                                                                                                                                                                                                                                                                                                                                                                                                                                                                   |           |              |                                                                                                                                                                                                                                                                                                                                                                                                                                                                                 |                                                                                                                                                                         |
| Employment status     | -                                                                                                                                                                                                                                                                                                                                                                                                                                                                                                                                                                                                                                 | -                                                                                                                                                                                                                                                                                                                                                                                                                                                                                                                                                                                                                                                                                                                                                                                                                                                                                                                                                                                                                                                                                                                                                                                                                                                                                                                  |       |                                          |     |                                                                                   |                                                                                                                                                                                                                                                                                                                                                                                                                                                                                                                                                                                                                                                                                                                                                                                                 |            |                                    |          |                                                                                                                                                                                                                                                                                                                                                                        |           |                                                                                                                                                                                                                                              |                                                                                                                                                                                                                                                                                                                                                                                                                                                                 |                                                                                                                              |   |   |                   |   |   |       |                                                              |    |                                                                                                     |                                                                                                                                                                                                                                                                                                                                                                                                                                                                                                                                                                                                                                                                                                                                                                                                                                                                                                                                                                                                                                                                                                                                                                                                                                                                                                                                                                                                                                                                                                                                                                                                                                                                                                                                                                                                                                                                                                                                                                                                                                  |      |                              |     |                                                                                                                                                                                                                                                                                                                    |      |                                                                                                                                                                                                                                                                                                                                                                                                                                    |              |                                    |     |              |       |                                                                                                                                |                   |   |               |                                                                                                                                                                                                                                                                                                                                                                                                                                                                                                                                                                                                                                   |           |              |                                                                                                                                                                                                                                                                                                                                                                                                                                                                                 |                                                                                                                                                                         |
| Other                 | Referral reason<br>Struggling with significant life change %                                                                                                                                                                                                                                                                                                                                                                                                                                                                                                                                                                      | 63                                                                                                                                                                                                                                                                                                                                                                                                                                                                                                                                                                                                                                                                                                                                                                                                                                                                                                                                                                                                                                                                                                                                                                                                                                                                                                                 |       |                                          |     |                                                                                   |                                                                                                                                                                                                                                                                                                                                                                                                                                                                                                                                                                                                                                                                                                                                                                                                 |            |                                    |          |                                                                                                                                                                                                                                                                                                                                                                        |           |                                                                                                                                                                                                                                              |                                                                                                                                                                                                                                                                                                                                                                                                                                                                 |                                                                                                                              |   |   |                   |   |   |       |                                                              |    |                                                                                                     |                                                                                                                                                                                                                                                                                                                                                                                                                                                                                                                                                                                                                                                                                                                                                                                                                                                                                                                                                                                                                                                                                                                                                                                                                                                                                                                                                                                                                                                                                                                                                                                                                                                                                                                                                                                                                                                                                                                                                                                                                                  |      |                              |     |                                                                                                                                                                                                                                                                                                                    |      |                                                                                                                                                                                                                                                                                                                                                                                                                                    |              |                                    |     |              |       |                                                                                                                                |                   |   |               |                                                                                                                                                                                                                                                                                                                                                                                                                                                                                                                                                                                                                                   |           |              |                                                                                                                                                                                                                                                                                                                                                                                                                                                                                 |                                                                                                                                                                         |
| Name                  | Social Prescribing in Bexley                                                                                                                                                                                                                                                                                                                                                                                                                                                                                                                                                                                                      |                                                                                                                                                                                                                                                                                                                                                                                                                                                                                                                                                                                                                                                                                                                                                                                                                                                                                                                                                                                                                                                                                                                                                                                                                                                                                                                    |       |                                          |     |                                                                                   |                                                                                                                                                                                                                                                                                                                                                                                                                                                                                                                                                                                                                                                                                                                                                                                                 |            |                                    |          |                                                                                                                                                                                                                                                                                                                                                                        |           |                                                                                                                                                                                                                                              |                                                                                                                                                                                                                                                                                                                                                                                                                                                                 |                                                                                                                              |   |   |                   |   |   |       |                                                              |    |                                                                                                     |                                                                                                                                                                                                                                                                                                                                                                                                                                                                                                                                                                                                                                                                                                                                                                                                                                                                                                                                                                                                                                                                                                                                                                                                                                                                                                                                                                                                                                                                                                                                                                                                                                                                                                                                                                                                                                                                                                                                                                                                                                  |      |                              |     |                                                                                                                                                                                                                                                                                                                    |      |                                                                                                                                                                                                                                                                                                                                                                                                                                    |              |                                    |     |              |       |                                                                                                                                |                   |   |               |                                                                                                                                                                                                                                                                                                                                                                                                                                                                                                                                                                                                                                   |           |              |                                                                                                                                                                                                                                                                                                                                                                                                                                                                                 |                                                                                                                                                                         |
| Why                   | Develop collaborative working with community groups and move away from a reactive, disease focused, fragmented model of care towards one that is more proactive, holistic and preventative, in which voluntary sector organisations and residents are encouraged to play a greater role in managing care provision                                                                                                                                                                                                                                                                                                                |                                                                                                                                                                                                                                                                                                                                                                                                                                                                                                                                                                                                                                                                                                                                                                                                                                                                                                                                                                                                                                                                                                                                                                                                                                                                                                                    |       |                                          |     |                                                                                   |                                                                                                                                                                                                                                                                                                                                                                                                                                                                                                                                                                                                                                                                                                                                                                                                 |            |                                    |          |                                                                                                                                                                                                                                                                                                                                                                        |           |                                                                                                                                                                                                                                              |                                                                                                                                                                                                                                                                                                                                                                                                                                                                 |                                                                                                                              |   |   |                   |   |   |       |                                                              |    |                                                                                                     |                                                                                                                                                                                                                                                                                                                                                                                                                                                                                                                                                                                                                                                                                                                                                                                                                                                                                                                                                                                                                                                                                                                                                                                                                                                                                                                                                                                                                                                                                                                                                                                                                                                                                                                                                                                                                                                                                                                                                                                                                                  |      |                              |     |                                                                                                                                                                                                                                                                                                                    |      |                                                                                                                                                                                                                                                                                                                                                                                                                                    |              |                                    |     |              |       |                                                                                                                                |                   |   |               |                                                                                                                                                                                                                                                                                                                                                                                                                                                                                                                                                                                                                                   |           |              |                                                                                                                                                                                                                                                                                                                                                                                                                                                                                 |                                                                                                                                                                         |
| What                  | Provides a mix of formal referring and informal signposting according to individual need. Coordinator has access to a range of voluntary and community services and activities who have signed up to be part of the initiative. Additional voluntary and community services which had not formally signed up to the programme were identified by the coordinator, and formed the basis of informal signposting, where appropriate.                                                                                                                                                                                                |                                                                                                                                                                                                                                                                                                                                                                                                                                                                                                                                                                                                                                                                                                                                                                                                                                                                                                                                                                                                                                                                                                                                                                                                                                                                                                                    |       |                                          |     |                                                                                   |                                                                                                                                                                                                                                                                                                                                                                                                                                                                                                                                                                                                                                                                                                                                                                                                 |            |                                    |          |                                                                                                                                                                                                                                                                                                                                                                        |           |                                                                                                                                                                                                                                              |                                                                                                                                                                                                                                                                                                                                                                                                                                                                 |                                                                                                                              |   |   |                   |   |   |       |                                                              |    |                                                                                                     |                                                                                                                                                                                                                                                                                                                                                                                                                                                                                                                                                                                                                                                                                                                                                                                                                                                                                                                                                                                                                                                                                                                                                                                                                                                                                                                                                                                                                                                                                                                                                                                                                                                                                                                                                                                                                                                                                                                                                                                                                                  |      |                              |     |                                                                                                                                                                                                                                                                                                                    |      |                                                                                                                                                                                                                                                                                                                                                                                                                                    |              |                                    |     |              |       |                                                                                                                                |                   |   |               |                                                                                                                                                                                                                                                                                                                                                                                                                                                                                                                                                                                                                                   |           |              |                                                                                                                                                                                                                                                                                                                                                                                                                                                                                 |                                                                                                                                                                         |
| Who provided          | One social prescribing coordinator                                                                                                                                                                                                                                                                                                                                                                                                                                                                                                                                                                                                |                                                                                                                                                                                                                                                                                                                                                                                                                                                                                                                                                                                                                                                                                                                                                                                                                                                                                                                                                                                                                                                                                                                                                                                                                                                                                                                    |       |                                          |     |                                                                                   |                                                                                                                                                                                                                                                                                                                                                                                                                                                                                                                                                                                                                                                                                                                                                                                                 |            |                                    |          |                                                                                                                                                                                                                                                                                                                                                                        |           |                                                                                                                                                                                                                                              |                                                                                                                                                                                                                                                                                                                                                                                                                                                                 |                                                                                                                              |   |   |                   |   |   |       |                                                              |    |                                                                                                     |                                                                                                                                                                                                                                                                                                                                                                                                                                                                                                                                                                                                                                                                                                                                                                                                                                                                                                                                                                                                                                                                                                                                                                                                                                                                                                                                                                                                                                                                                                                                                                                                                                                                                                                                                                                                                                                                                                                                                                                                                                  |      |                              |     |                                                                                                                                                                                                                                                                                                                    |      |                                                                                                                                                                                                                                                                                                                                                                                                                                    |              |                                    |     |              |       |                                                                                                                                |                   |   |               |                                                                                                                                                                                                                                                                                                                                                                                                                                                                                                                                                                                                                                   |           |              |                                                                                                                                                                                                                                                                                                                                                                                                                                                                                 |                                                                                                                                                                         |
| How                   | Face-to-face                                                                                                                                                                                                                                                                                                                                                                                                                                                                                                                                                                                                                      |                                                                                                                                                                                                                                                                                                                                                                                                                                                                                                                                                                                                                                                                                                                                                                                                                                                                                                                                                                                                                                                                                                                                                                                                                                                                                                                    |       |                                          |     |                                                                                   |                                                                                                                                                                                                                                                                                                                                                                                                                                                                                                                                                                                                                                                                                                                                                                                                 |            |                                    |          |                                                                                                                                                                                                                                                                                                                                                                        |           |                                                                                                                                                                                                                                              |                                                                                                                                                                                                                                                                                                                                                                                                                                                                 |                                                                                                                              |   |   |                   |   |   |       |                                                              |    |                                                                                                     |                                                                                                                                                                                                                                                                                                                                                                                                                                                                                                                                                                                                                                                                                                                                                                                                                                                                                                                                                                                                                                                                                                                                                                                                                                                                                                                                                                                                                                                                                                                                                                                                                                                                                                                                                                                                                                                                                                                                                                                                                                  |      |                              |     |                                                                                                                                                                                                                                                                                                                    |      |                                                                                                                                                                                                                                                                                                                                                                                                                                    |              |                                    |     |              |       |                                                                                                                                |                   |   |               |                                                                                                                                                                                                                                                                                                                                                                                                                                                                                                                                                                                                                                   |           |              |                                                                                                                                                                                                                                                                                                                                                                                                                                                                                 |                                                                                                                                                                         |
| Where                 | Coordinator meets clients at a mutually beneficial location, which includes home visits, GP surgeries, and community locations                                                                                                                                                                                                                                                                                                                                                                                                                                                                                                    |                                                                                                                                                                                                                                                                                                                                                                                                                                                                                                                                                                                                                                                                                                                                                                                                                                                                                                                                                                                                                                                                                                                                                                                                                                                                                                                    |       |                                          |     |                                                                                   |                                                                                                                                                                                                                                                                                                                                                                                                                                                                                                                                                                                                                                                                                                                                                                                                 |            |                                    |          |                                                                                                                                                                                                                                                                                                                                                                        |           |                                                                                                                                                                                                                                              |                                                                                                                                                                                                                                                                                                                                                                                                                                                                 |                                                                                                                              |   |   |                   |   |   |       |                                                              |    |                                                                                                     |                                                                                                                                                                                                                                                                                                                                                                                                                                                                                                                                                                                                                                                                                                                                                                                                                                                                                                                                                                                                                                                                                                                                                                                                                                                                                                                                                                                                                                                                                                                                                                                                                                                                                                                                                                                                                                                                                                                                                                                                                                  |      |                              |     |                                                                                                                                                                                                                                                                                                                    |      |                                                                                                                                                                                                                                                                                                                                                                                                                                    |              |                                    |     |              |       |                                                                                                                                |                   |   |               |                                                                                                                                                                                                                                                                                                                                                                                                                                                                                                                                                                                                                                   |           |              |                                                                                                                                                                                                                                                                                                                                                                                                                                                                                 |                                                                                                                                                                         |
| When and How Much     | -                                                                                                                                                                                                                                                                                                                                                                                                                                                                                                                                                                                                                                 |                                                                                                                                                                                                                                                                                                                                                                                                                                                                                                                                                                                                                                                                                                                                                                                                                                                                                                                                                                                                                                                                                                                                                                                                                                                                                                                    |       |                                          |     |                                                                                   |                                                                                                                                                                                                                                                                                                                                                                                                                                                                                                                                                                                                                                                                                                                                                                                                 |            |                                    |          |                                                                                                                                                                                                                                                                                                                                                                        |           |                                                                                                                                                                                                                                              |                                                                                                                                                                                                                                                                                                                                                                                                                                                                 |                                                                                                                              |   |   |                   |   |   |       |                                                              |    |                                                                                                     |                                                                                                                                                                                                                                                                                                                                                                                                                                                                                                                                                                                                                                                                                                                                                                                                                                                                                                                                                                                                                                                                                                                                                                                                                                                                                                                                                                                                                                                                                                                                                                                                                                                                                                                                                                                                                                                                                                                                                                                                                                  |      |                              |     |                                                                                                                                                                                                                                                                                                                    |      |                                                                                                                                                                                                                                                                                                                                                                                                                                    |              |                                    |     |              |       |                                                                                                                                |                   |   |               |                                                                                                                                                                                                                                                                                                                                                                                                                                                                                                                                                                                                                                   |           |              |                                                                                                                                                                                                                                                                                                                                                                                                                                                                                 |                                                                                                                                                                         |
| Modifications         | The pilot included nine GP surgeries, and was initially aimed at clients who were 65 years and over. After the initial three months, the eligibility criteria was widened to include those aged 18 years and over and also included the opportunity for individuals to self-refer. Following a mid-programme review of the pilot, the coordinator identified a barrier to the service; namely that some clients found it difficult to attend the social prescribing assessments at GP surgeries primarily due to mobility. As a result, home visits and assessments in community locations were included at the assessment stage. |                                                                                                                                                                                                                                                                                                                                                                                                                                                                                                                                                                                                                                                                                                                                                                                                                                                                                                                                                                                                                                                                                                                                                                                                                                                                                                                    |       |                                          |     |                                                                                   |                                                                                                                                                                                                                                                                                                                                                                                                                                                                                                                                                                                                                                                                                                                                                                                                 |            |                                    |          |                                                                                                                                                                                                                                                                                                                                                                        |           |                                                                                                                                                                                                                                              |                                                                                                                                                                                                                                                                                                                                                                                                                                                                 |                                                                                                                              |   |   |                   |   |   |       |                                                              |    |                                                                                                     |                                                                                                                                                                                                                                                                                                                                                                                                                                                                                                                                                                                                                                                                                                                                                                                                                                                                                                                                                                                                                                                                                                                                                                                                                                                                                                                                                                                                                                                                                                                                                                                                                                                                                                                                                                                                                                                                                                                                                                                                                                  |      |                              |     |                                                                                                                                                                                                                                                                                                                    |      |                                                                                                                                                                                                                                                                                                                                                                                                                                    |              |                                    |     |              |       |                                                                                                                                |                   |   |               |                                                                                                                                                                                                                                                                                                                                                                                                                                                                                                                                                                                                                                   |           |              |                                                                                                                                                                                                                                                                                                                                                                                                                                                                                 |                                                                                                                                                                         |
| Tailoring             | Personalized                                                                                                                                                                                                                                                                                                                                                                                                                                                                                                                                                                                                                      |                                                                                                                                                                                                                                                                                                                                                                                                                                                                                                                                                                                                                                                                                                                                                                                                                                                                                                                                                                                                                                                                                                                                                                                                                                                                                                                    |       |                                          |     |                                                                                   |                                                                                                                                                                                                                                                                                                                                                                                                                                                                                                                                                                                                                                                                                                                                                                                                 |            |                                    |          |                                                                                                                                                                                                                                                                                                                                                                        |           |                                                                                                                                                                                                                                              |                                                                                                                                                                                                                                                                                                                                                                                                                                                                 |                                                                                                                              |   |   |                   |   |   |       |                                                              |    |                                                                                                     |                                                                                                                                                                                                                                                                                                                                                                                                                                                                                                                                                                                                                                                                                                                                                                                                                                                                                                                                                                                                                                                                                                                                                                                                                                                                                                                                                                                                                                                                                                                                                                                                                                                                                                                                                                                                                                                                                                                                                                                                                                  |      |                              |     |                                                                                                                                                                                                                                                                                                                    |      |                                                                                                                                                                                                                                                                                                                                                                                                                                    |              |                                    |     |              |       |                                                                                                                                |                   |   |               |                                                                                                                                                                                                                                                                                                                                                                                                                                                                                                                                                                                                                                   |           |              |                                                                                                                                                                                                                                                                                                                                                                                                                                                                                 |                                                                                                                                                                         |
| Peschery 2019 (82,83) | <p>Uncontrolled before-and-after study, mixed-methods</p> <p>Study length: 26 months</p>                                                                                                                                                                                                                                                                                                                                                                                                                                                                                                                                          | <p><b>Inclusion criteria:</b></p> <p>People (18+ years old) with high risk for or diagnosis with type 2 diabetes and chronic obstructive pulmonary disease, people with mild to moderate mental health issues, people who are experiencing loneliness and/or social isolation and carers.</p> <p><b>Exclusion criteria:</b> -</p> <p>Baseline characteristics:</p> <table border="1"> <tr> <td>N</td> <td></td> <td>448</td> </tr> </table>                                                                                                                                                                                                                                                                                                                                                                                                                                                                                                                                                                                                                                                                                                                                                                                                                                                                        | N     |                                          | 448 | <p>Primary Care</p> <p>Country:<br/>UK (Luton, Bedfordshire, Eastern England)</p> | <table border="1"> <tr> <td>Name</td> <td>Luton Social prescribing programme</td> </tr> <tr> <td>Why</td> <td>To reduce health inequalities within Luton.<br/><br/>To promote good health and independence for adults and older people with LTCs and carers.<br/><br/>To empower individuals and communities to have greater control over their own health<br/><br/>To strengthen community development.<br/><br/>To develop and improve the integration of health and social care services.</td> </tr> <tr> <td>What</td> <td>Referral from a GP to a link worker. Individual assessment to identify the non-medical needs of service users, motivational interviewing and continuous personalised support, and to link service users with non-medical sources of support,</td> </tr> </table> | Name       | Luton Social prescribing programme | Why      | To reduce health inequalities within Luton.<br><br>To promote good health and independence for adults and older people with LTCs and carers.<br><br>To empower individuals and communities to have greater control over their own health<br><br>To strengthen community development.<br><br>To develop and improve the integration of health and social care services. | What      | Referral from a GP to a link worker. Individual assessment to identify the non-medical needs of service users, motivational interviewing and continuous personalised support, and to link service users with non-medical sources of support, | <p>Patient outcomes at Baseline and at follow-up directly post-intervention through link worker. Subgroup analyses for gender, employment status and age groups:</p> <ul style="list-style-type: none"> <li>- Short Warwick Edinburgh Mental Wellbeing Scale</li> </ul> <p>At Baseline and at follow-up directly post-intervention:</p> <ul style="list-style-type: none"> <li>- International Physical Activity Questionnaire Short Form (IPAQ-SF),</li> </ul> | <p>Peer-Review: Partly (1/2)</p> <p>Funding source: Luton Borough Council</p> <p>Declarations of interest: None declared</p> |   |   |                   |   |   |       |                                                              |    |                                                                                                     |                                                                                                                                                                                                                                                                                                                                                                                                                                                                                                                                                                                                                                                                                                                                                                                                                                                                                                                                                                                                                                                                                                                                                                                                                                                                                                                                                                                                                                                                                                                                                                                                                                                                                                                                                                                                                                                                                                                                                                                                                                  |      |                              |     |                                                                                                                                                                                                                                                                                                                    |      |                                                                                                                                                                                                                                                                                                                                                                                                                                    |              |                                    |     |              |       |                                                                                                                                |                   |   |               |                                                                                                                                                                                                                                                                                                                                                                                                                                                                                                                                                                                                                                   |           |              |                                                                                                                                                                                                                                                                                                                                                                                                                                                                                 |                                                                                                                                                                         |
| N                     |                                                                                                                                                                                                                                                                                                                                                                                                                                                                                                                                                                                                                                   | 448                                                                                                                                                                                                                                                                                                                                                                                                                                                                                                                                                                                                                                                                                                                                                                                                                                                                                                                                                                                                                                                                                                                                                                                                                                                                                                                |       |                                          |     |                                                                                   |                                                                                                                                                                                                                                                                                                                                                                                                                                                                                                                                                                                                                                                                                                                                                                                                 |            |                                    |          |                                                                                                                                                                                                                                                                                                                                                                        |           |                                                                                                                                                                                                                                              |                                                                                                                                                                                                                                                                                                                                                                                                                                                                 |                                                                                                                              |   |   |                   |   |   |       |                                                              |    |                                                                                                     |                                                                                                                                                                                                                                                                                                                                                                                                                                                                                                                                                                                                                                                                                                                                                                                                                                                                                                                                                                                                                                                                                                                                                                                                                                                                                                                                                                                                                                                                                                                                                                                                                                                                                                                                                                                                                                                                                                                                                                                                                                  |      |                              |     |                                                                                                                                                                                                                                                                                                                    |      |                                                                                                                                                                                                                                                                                                                                                                                                                                    |              |                                    |     |              |       |                                                                                                                                |                   |   |               |                                                                                                                                                                                                                                                                                                                                                                                                                                                                                                                                                                                                                                   |           |              |                                                                                                                                                                                                                                                                                                                                                                                                                                                                                 |                                                                                                                                                                         |
| Name                  | Luton Social prescribing programme                                                                                                                                                                                                                                                                                                                                                                                                                                                                                                                                                                                                |                                                                                                                                                                                                                                                                                                                                                                                                                                                                                                                                                                                                                                                                                                                                                                                                                                                                                                                                                                                                                                                                                                                                                                                                                                                                                                                    |       |                                          |     |                                                                                   |                                                                                                                                                                                                                                                                                                                                                                                                                                                                                                                                                                                                                                                                                                                                                                                                 |            |                                    |          |                                                                                                                                                                                                                                                                                                                                                                        |           |                                                                                                                                                                                                                                              |                                                                                                                                                                                                                                                                                                                                                                                                                                                                 |                                                                                                                              |   |   |                   |   |   |       |                                                              |    |                                                                                                     |                                                                                                                                                                                                                                                                                                                                                                                                                                                                                                                                                                                                                                                                                                                                                                                                                                                                                                                                                                                                                                                                                                                                                                                                                                                                                                                                                                                                                                                                                                                                                                                                                                                                                                                                                                                                                                                                                                                                                                                                                                  |      |                              |     |                                                                                                                                                                                                                                                                                                                    |      |                                                                                                                                                                                                                                                                                                                                                                                                                                    |              |                                    |     |              |       |                                                                                                                                |                   |   |               |                                                                                                                                                                                                                                                                                                                                                                                                                                                                                                                                                                                                                                   |           |              |                                                                                                                                                                                                                                                                                                                                                                                                                                                                                 |                                                                                                                                                                         |
| Why                   | To reduce health inequalities within Luton.<br><br>To promote good health and independence for adults and older people with LTCs and carers.<br><br>To empower individuals and communities to have greater control over their own health<br><br>To strengthen community development.<br><br>To develop and improve the integration of health and social care services.                                                                                                                                                                                                                                                            |                                                                                                                                                                                                                                                                                                                                                                                                                                                                                                                                                                                                                                                                                                                                                                                                                                                                                                                                                                                                                                                                                                                                                                                                                                                                                                                    |       |                                          |     |                                                                                   |                                                                                                                                                                                                                                                                                                                                                                                                                                                                                                                                                                                                                                                                                                                                                                                                 |            |                                    |          |                                                                                                                                                                                                                                                                                                                                                                        |           |                                                                                                                                                                                                                                              |                                                                                                                                                                                                                                                                                                                                                                                                                                                                 |                                                                                                                              |   |   |                   |   |   |       |                                                              |    |                                                                                                     |                                                                                                                                                                                                                                                                                                                                                                                                                                                                                                                                                                                                                                                                                                                                                                                                                                                                                                                                                                                                                                                                                                                                                                                                                                                                                                                                                                                                                                                                                                                                                                                                                                                                                                                                                                                                                                                                                                                                                                                                                                  |      |                              |     |                                                                                                                                                                                                                                                                                                                    |      |                                                                                                                                                                                                                                                                                                                                                                                                                                    |              |                                    |     |              |       |                                                                                                                                |                   |   |               |                                                                                                                                                                                                                                                                                                                                                                                                                                                                                                                                                                                                                                   |           |              |                                                                                                                                                                                                                                                                                                                                                                                                                                                                                 |                                                                                                                                                                         |
| What                  | Referral from a GP to a link worker. Individual assessment to identify the non-medical needs of service users, motivational interviewing and continuous personalised support, and to link service users with non-medical sources of support,                                                                                                                                                                                                                                                                                                                                                                                      |                                                                                                                                                                                                                                                                                                                                                                                                                                                                                                                                                                                                                                                                                                                                                                                                                                                                                                                                                                                                                                                                                                                                                                                                                                                                                                                    |       |                                          |     |                                                                                   |                                                                                                                                                                                                                                                                                                                                                                                                                                                                                                                                                                                                                                                                                                                                                                                                 |            |                                    |          |                                                                                                                                                                                                                                                                                                                                                                        |           |                                                                                                                                                                                                                                              |                                                                                                                                                                                                                                                                                                                                                                                                                                                                 |                                                                                                                              |   |   |                   |   |   |       |                                                              |    |                                                                                                     |                                                                                                                                                                                                                                                                                                                                                                                                                                                                                                                                                                                                                                                                                                                                                                                                                                                                                                                                                                                                                                                                                                                                                                                                                                                                                                                                                                                                                                                                                                                                                                                                                                                                                                                                                                                                                                                                                                                                                                                                                                  |      |                              |     |                                                                                                                                                                                                                                                                                                                    |      |                                                                                                                                                                                                                                                                                                                                                                                                                                    |              |                                    |     |              |       |                                                                                                                                |                   |   |               |                                                                                                                                                                                                                                                                                                                                                                                                                                                                                                                                                                                                                                   |           |              |                                                                                                                                                                                                                                                                                                                                                                                                                                                                                 |                                                                                                                                                                         |

|                    |                                                                                                                                                                                                                                                                                                                                                                                                                                                                                                        | <table border="1"> <tr> <td>Age</td> <td>Mean (SD)</td> <td>50.3 (16.8)</td> </tr> <tr> <td>Gender</td> <td>Female %</td> <td>65.2</td> </tr> <tr> <td>Ethnicity</td> <td>-</td> <td>-</td> </tr> <tr> <td>Living arrangement</td> <td>-</td> <td>-</td> </tr> <tr> <td>Employment status</td> <td>Not working %</td> <td>59.4</td> </tr> <tr> <td>Other</td> <td>-</td> <td>-</td> </tr> </table> <p>Population: General</p>                                                                                                                                                                                                                                                                                                                                                                                                                                                                                                                                                                                                                                                                       | Age                                                                                                                           | Mean (SD)                                                                                                                                                                                                                                                                                                                                                                                                                                                                                            | 50.3 (16.8) | Gender                                                             | Female % | 65.2                                                                                                                                                                                                                                                                                                            | Ethnicity                                                                                                                                                                                                                              | -                                                                                                      | -   | Living arrangement | -            | -    | Employment status | Not working % | 59.4 | Other | -         | -       |      | <table border="1"> <tr> <td></td> <td>to help to improve their health and well-being. Re-assessment after a number of sessions and exit interview</td> </tr> <tr> <td>Who provided</td> <td>Link worker/navigator</td> </tr> <tr> <td>How</td> <td>-</td> </tr> <tr> <td>Where</td> <td>-</td> </tr> <tr> <td>When and How Much</td> <td>Flexible, up to 12 free sessions</td> </tr> <tr> <td>Tailoring</td> <td>Personalized</td> </tr> </table> <p>Intervention: Holistic</p> |                    | to help to improve their health and well-being. Re-assessment after a number of sessions and exit interview | Who provided | Link worker/navigator | How               | -            | Where | - | When and How Much | Flexible, up to 12 free sessions | Tailoring | Personalized | MET                                                                                            |                                                                                                                                                                                                                                                                                                                                                                                                                                                                                                                                                                                                                                                                                                                                                                                                                                                                                                                                                                                                                                                                                                                                                                                                                                                                                                                                                                                                                                                                                                                                                                                  |  |   |   |      |                                       |  |     |                                                                                         |  |      |                                                                                                                                                                                                                                                                                                                                                                                                                                                                                                        |                                                                                                                                                                                                                                                                                                                                            |              |                                                  |  |     |   |  |       |            |  |                   |   |  |           |   |  |                                                                                                                                                                                                                                                                                                                                                                                                                                                                                                                                                                                                                                                                                                                                                                                                                                                                                                                                                                 |                                                                                                           |
|--------------------|--------------------------------------------------------------------------------------------------------------------------------------------------------------------------------------------------------------------------------------------------------------------------------------------------------------------------------------------------------------------------------------------------------------------------------------------------------------------------------------------------------|-----------------------------------------------------------------------------------------------------------------------------------------------------------------------------------------------------------------------------------------------------------------------------------------------------------------------------------------------------------------------------------------------------------------------------------------------------------------------------------------------------------------------------------------------------------------------------------------------------------------------------------------------------------------------------------------------------------------------------------------------------------------------------------------------------------------------------------------------------------------------------------------------------------------------------------------------------------------------------------------------------------------------------------------------------------------------------------------------------|-------------------------------------------------------------------------------------------------------------------------------|------------------------------------------------------------------------------------------------------------------------------------------------------------------------------------------------------------------------------------------------------------------------------------------------------------------------------------------------------------------------------------------------------------------------------------------------------------------------------------------------------|-------------|--------------------------------------------------------------------|----------|-----------------------------------------------------------------------------------------------------------------------------------------------------------------------------------------------------------------------------------------------------------------------------------------------------------------|----------------------------------------------------------------------------------------------------------------------------------------------------------------------------------------------------------------------------------------|--------------------------------------------------------------------------------------------------------|-----|--------------------|--------------|------|-------------------|---------------|------|-------|-----------|---------|------|---------------------------------------------------------------------------------------------------------------------------------------------------------------------------------------------------------------------------------------------------------------------------------------------------------------------------------------------------------------------------------------------------------------------------------------------------------------------------------|--------------------|-------------------------------------------------------------------------------------------------------------|--------------|-----------------------|-------------------|--------------|-------|---|-------------------|----------------------------------|-----------|--------------|------------------------------------------------------------------------------------------------|----------------------------------------------------------------------------------------------------------------------------------------------------------------------------------------------------------------------------------------------------------------------------------------------------------------------------------------------------------------------------------------------------------------------------------------------------------------------------------------------------------------------------------------------------------------------------------------------------------------------------------------------------------------------------------------------------------------------------------------------------------------------------------------------------------------------------------------------------------------------------------------------------------------------------------------------------------------------------------------------------------------------------------------------------------------------------------------------------------------------------------------------------------------------------------------------------------------------------------------------------------------------------------------------------------------------------------------------------------------------------------------------------------------------------------------------------------------------------------------------------------------------------------------------------------------------------------|--|---|---|------|---------------------------------------|--|-----|-----------------------------------------------------------------------------------------|--|------|--------------------------------------------------------------------------------------------------------------------------------------------------------------------------------------------------------------------------------------------------------------------------------------------------------------------------------------------------------------------------------------------------------------------------------------------------------------------------------------------------------|--------------------------------------------------------------------------------------------------------------------------------------------------------------------------------------------------------------------------------------------------------------------------------------------------------------------------------------------|--------------|--------------------------------------------------|--|-----|---|--|-------|------------|--|-------------------|---|--|-----------|---|--|-----------------------------------------------------------------------------------------------------------------------------------------------------------------------------------------------------------------------------------------------------------------------------------------------------------------------------------------------------------------------------------------------------------------------------------------------------------------------------------------------------------------------------------------------------------------------------------------------------------------------------------------------------------------------------------------------------------------------------------------------------------------------------------------------------------------------------------------------------------------------------------------------------------------------------------------------------------------|-----------------------------------------------------------------------------------------------------------|
| Age                | Mean (SD)                                                                                                                                                                                                                                                                                                                                                                                                                                                                                              | 50.3 (16.8)                                                                                                                                                                                                                                                                                                                                                                                                                                                                                                                                                                                                                                                                                                                                                                                                                                                                                                                                                                                                                                                                                         |                                                                                                                               |                                                                                                                                                                                                                                                                                                                                                                                                                                                                                                      |             |                                                                    |          |                                                                                                                                                                                                                                                                                                                 |                                                                                                                                                                                                                                        |                                                                                                        |     |                    |              |      |                   |               |      |       |           |         |      |                                                                                                                                                                                                                                                                                                                                                                                                                                                                                 |                    |                                                                                                             |              |                       |                   |              |       |   |                   |                                  |           |              |                                                                                                |                                                                                                                                                                                                                                                                                                                                                                                                                                                                                                                                                                                                                                                                                                                                                                                                                                                                                                                                                                                                                                                                                                                                                                                                                                                                                                                                                                                                                                                                                                                                                                                  |  |   |   |      |                                       |  |     |                                                                                         |  |      |                                                                                                                                                                                                                                                                                                                                                                                                                                                                                                        |                                                                                                                                                                                                                                                                                                                                            |              |                                                  |  |     |   |  |       |            |  |                   |   |  |           |   |  |                                                                                                                                                                                                                                                                                                                                                                                                                                                                                                                                                                                                                                                                                                                                                                                                                                                                                                                                                                 |                                                                                                           |
| Gender             | Female %                                                                                                                                                                                                                                                                                                                                                                                                                                                                                               | 65.2                                                                                                                                                                                                                                                                                                                                                                                                                                                                                                                                                                                                                                                                                                                                                                                                                                                                                                                                                                                                                                                                                                |                                                                                                                               |                                                                                                                                                                                                                                                                                                                                                                                                                                                                                                      |             |                                                                    |          |                                                                                                                                                                                                                                                                                                                 |                                                                                                                                                                                                                                        |                                                                                                        |     |                    |              |      |                   |               |      |       |           |         |      |                                                                                                                                                                                                                                                                                                                                                                                                                                                                                 |                    |                                                                                                             |              |                       |                   |              |       |   |                   |                                  |           |              |                                                                                                |                                                                                                                                                                                                                                                                                                                                                                                                                                                                                                                                                                                                                                                                                                                                                                                                                                                                                                                                                                                                                                                                                                                                                                                                                                                                                                                                                                                                                                                                                                                                                                                  |  |   |   |      |                                       |  |     |                                                                                         |  |      |                                                                                                                                                                                                                                                                                                                                                                                                                                                                                                        |                                                                                                                                                                                                                                                                                                                                            |              |                                                  |  |     |   |  |       |            |  |                   |   |  |           |   |  |                                                                                                                                                                                                                                                                                                                                                                                                                                                                                                                                                                                                                                                                                                                                                                                                                                                                                                                                                                 |                                                                                                           |
| Ethnicity          | -                                                                                                                                                                                                                                                                                                                                                                                                                                                                                                      | -                                                                                                                                                                                                                                                                                                                                                                                                                                                                                                                                                                                                                                                                                                                                                                                                                                                                                                                                                                                                                                                                                                   |                                                                                                                               |                                                                                                                                                                                                                                                                                                                                                                                                                                                                                                      |             |                                                                    |          |                                                                                                                                                                                                                                                                                                                 |                                                                                                                                                                                                                                        |                                                                                                        |     |                    |              |      |                   |               |      |       |           |         |      |                                                                                                                                                                                                                                                                                                                                                                                                                                                                                 |                    |                                                                                                             |              |                       |                   |              |       |   |                   |                                  |           |              |                                                                                                |                                                                                                                                                                                                                                                                                                                                                                                                                                                                                                                                                                                                                                                                                                                                                                                                                                                                                                                                                                                                                                                                                                                                                                                                                                                                                                                                                                                                                                                                                                                                                                                  |  |   |   |      |                                       |  |     |                                                                                         |  |      |                                                                                                                                                                                                                                                                                                                                                                                                                                                                                                        |                                                                                                                                                                                                                                                                                                                                            |              |                                                  |  |     |   |  |       |            |  |                   |   |  |           |   |  |                                                                                                                                                                                                                                                                                                                                                                                                                                                                                                                                                                                                                                                                                                                                                                                                                                                                                                                                                                 |                                                                                                           |
| Living arrangement | -                                                                                                                                                                                                                                                                                                                                                                                                                                                                                                      | -                                                                                                                                                                                                                                                                                                                                                                                                                                                                                                                                                                                                                                                                                                                                                                                                                                                                                                                                                                                                                                                                                                   |                                                                                                                               |                                                                                                                                                                                                                                                                                                                                                                                                                                                                                                      |             |                                                                    |          |                                                                                                                                                                                                                                                                                                                 |                                                                                                                                                                                                                                        |                                                                                                        |     |                    |              |      |                   |               |      |       |           |         |      |                                                                                                                                                                                                                                                                                                                                                                                                                                                                                 |                    |                                                                                                             |              |                       |                   |              |       |   |                   |                                  |           |              |                                                                                                |                                                                                                                                                                                                                                                                                                                                                                                                                                                                                                                                                                                                                                                                                                                                                                                                                                                                                                                                                                                                                                                                                                                                                                                                                                                                                                                                                                                                                                                                                                                                                                                  |  |   |   |      |                                       |  |     |                                                                                         |  |      |                                                                                                                                                                                                                                                                                                                                                                                                                                                                                                        |                                                                                                                                                                                                                                                                                                                                            |              |                                                  |  |     |   |  |       |            |  |                   |   |  |           |   |  |                                                                                                                                                                                                                                                                                                                                                                                                                                                                                                                                                                                                                                                                                                                                                                                                                                                                                                                                                                 |                                                                                                           |
| Employment status  | Not working %                                                                                                                                                                                                                                                                                                                                                                                                                                                                                          | 59.4                                                                                                                                                                                                                                                                                                                                                                                                                                                                                                                                                                                                                                                                                                                                                                                                                                                                                                                                                                                                                                                                                                |                                                                                                                               |                                                                                                                                                                                                                                                                                                                                                                                                                                                                                                      |             |                                                                    |          |                                                                                                                                                                                                                                                                                                                 |                                                                                                                                                                                                                                        |                                                                                                        |     |                    |              |      |                   |               |      |       |           |         |      |                                                                                                                                                                                                                                                                                                                                                                                                                                                                                 |                    |                                                                                                             |              |                       |                   |              |       |   |                   |                                  |           |              |                                                                                                |                                                                                                                                                                                                                                                                                                                                                                                                                                                                                                                                                                                                                                                                                                                                                                                                                                                                                                                                                                                                                                                                                                                                                                                                                                                                                                                                                                                                                                                                                                                                                                                  |  |   |   |      |                                       |  |     |                                                                                         |  |      |                                                                                                                                                                                                                                                                                                                                                                                                                                                                                                        |                                                                                                                                                                                                                                                                                                                                            |              |                                                  |  |     |   |  |       |            |  |                   |   |  |           |   |  |                                                                                                                                                                                                                                                                                                                                                                                                                                                                                                                                                                                                                                                                                                                                                                                                                                                                                                                                                                 |                                                                                                           |
| Other              | -                                                                                                                                                                                                                                                                                                                                                                                                                                                                                                      | -                                                                                                                                                                                                                                                                                                                                                                                                                                                                                                                                                                                                                                                                                                                                                                                                                                                                                                                                                                                                                                                                                                   |                                                                                                                               |                                                                                                                                                                                                                                                                                                                                                                                                                                                                                                      |             |                                                                    |          |                                                                                                                                                                                                                                                                                                                 |                                                                                                                                                                                                                                        |                                                                                                        |     |                    |              |      |                   |               |      |       |           |         |      |                                                                                                                                                                                                                                                                                                                                                                                                                                                                                 |                    |                                                                                                             |              |                       |                   |              |       |   |                   |                                  |           |              |                                                                                                |                                                                                                                                                                                                                                                                                                                                                                                                                                                                                                                                                                                                                                                                                                                                                                                                                                                                                                                                                                                                                                                                                                                                                                                                                                                                                                                                                                                                                                                                                                                                                                                  |  |   |   |      |                                       |  |     |                                                                                         |  |      |                                                                                                                                                                                                                                                                                                                                                                                                                                                                                                        |                                                                                                                                                                                                                                                                                                                                            |              |                                                  |  |     |   |  |       |            |  |                   |   |  |           |   |  |                                                                                                                                                                                                                                                                                                                                                                                                                                                                                                                                                                                                                                                                                                                                                                                                                                                                                                                                                                 |                                                                                                           |
|                    | to help to improve their health and well-being. Re-assessment after a number of sessions and exit interview                                                                                                                                                                                                                                                                                                                                                                                            |                                                                                                                                                                                                                                                                                                                                                                                                                                                                                                                                                                                                                                                                                                                                                                                                                                                                                                                                                                                                                                                                                                     |                                                                                                                               |                                                                                                                                                                                                                                                                                                                                                                                                                                                                                                      |             |                                                                    |          |                                                                                                                                                                                                                                                                                                                 |                                                                                                                                                                                                                                        |                                                                                                        |     |                    |              |      |                   |               |      |       |           |         |      |                                                                                                                                                                                                                                                                                                                                                                                                                                                                                 |                    |                                                                                                             |              |                       |                   |              |       |   |                   |                                  |           |              |                                                                                                |                                                                                                                                                                                                                                                                                                                                                                                                                                                                                                                                                                                                                                                                                                                                                                                                                                                                                                                                                                                                                                                                                                                                                                                                                                                                                                                                                                                                                                                                                                                                                                                  |  |   |   |      |                                       |  |     |                                                                                         |  |      |                                                                                                                                                                                                                                                                                                                                                                                                                                                                                                        |                                                                                                                                                                                                                                                                                                                                            |              |                                                  |  |     |   |  |       |            |  |                   |   |  |           |   |  |                                                                                                                                                                                                                                                                                                                                                                                                                                                                                                                                                                                                                                                                                                                                                                                                                                                                                                                                                                 |                                                                                                           |
| Who provided       | Link worker/navigator                                                                                                                                                                                                                                                                                                                                                                                                                                                                                  |                                                                                                                                                                                                                                                                                                                                                                                                                                                                                                                                                                                                                                                                                                                                                                                                                                                                                                                                                                                                                                                                                                     |                                                                                                                               |                                                                                                                                                                                                                                                                                                                                                                                                                                                                                                      |             |                                                                    |          |                                                                                                                                                                                                                                                                                                                 |                                                                                                                                                                                                                                        |                                                                                                        |     |                    |              |      |                   |               |      |       |           |         |      |                                                                                                                                                                                                                                                                                                                                                                                                                                                                                 |                    |                                                                                                             |              |                       |                   |              |       |   |                   |                                  |           |              |                                                                                                |                                                                                                                                                                                                                                                                                                                                                                                                                                                                                                                                                                                                                                                                                                                                                                                                                                                                                                                                                                                                                                                                                                                                                                                                                                                                                                                                                                                                                                                                                                                                                                                  |  |   |   |      |                                       |  |     |                                                                                         |  |      |                                                                                                                                                                                                                                                                                                                                                                                                                                                                                                        |                                                                                                                                                                                                                                                                                                                                            |              |                                                  |  |     |   |  |       |            |  |                   |   |  |           |   |  |                                                                                                                                                                                                                                                                                                                                                                                                                                                                                                                                                                                                                                                                                                                                                                                                                                                                                                                                                                 |                                                                                                           |
| How                | -                                                                                                                                                                                                                                                                                                                                                                                                                                                                                                      |                                                                                                                                                                                                                                                                                                                                                                                                                                                                                                                                                                                                                                                                                                                                                                                                                                                                                                                                                                                                                                                                                                     |                                                                                                                               |                                                                                                                                                                                                                                                                                                                                                                                                                                                                                                      |             |                                                                    |          |                                                                                                                                                                                                                                                                                                                 |                                                                                                                                                                                                                                        |                                                                                                        |     |                    |              |      |                   |               |      |       |           |         |      |                                                                                                                                                                                                                                                                                                                                                                                                                                                                                 |                    |                                                                                                             |              |                       |                   |              |       |   |                   |                                  |           |              |                                                                                                |                                                                                                                                                                                                                                                                                                                                                                                                                                                                                                                                                                                                                                                                                                                                                                                                                                                                                                                                                                                                                                                                                                                                                                                                                                                                                                                                                                                                                                                                                                                                                                                  |  |   |   |      |                                       |  |     |                                                                                         |  |      |                                                                                                                                                                                                                                                                                                                                                                                                                                                                                                        |                                                                                                                                                                                                                                                                                                                                            |              |                                                  |  |     |   |  |       |            |  |                   |   |  |           |   |  |                                                                                                                                                                                                                                                                                                                                                                                                                                                                                                                                                                                                                                                                                                                                                                                                                                                                                                                                                                 |                                                                                                           |
| Where              | -                                                                                                                                                                                                                                                                                                                                                                                                                                                                                                      |                                                                                                                                                                                                                                                                                                                                                                                                                                                                                                                                                                                                                                                                                                                                                                                                                                                                                                                                                                                                                                                                                                     |                                                                                                                               |                                                                                                                                                                                                                                                                                                                                                                                                                                                                                                      |             |                                                                    |          |                                                                                                                                                                                                                                                                                                                 |                                                                                                                                                                                                                                        |                                                                                                        |     |                    |              |      |                   |               |      |       |           |         |      |                                                                                                                                                                                                                                                                                                                                                                                                                                                                                 |                    |                                                                                                             |              |                       |                   |              |       |   |                   |                                  |           |              |                                                                                                |                                                                                                                                                                                                                                                                                                                                                                                                                                                                                                                                                                                                                                                                                                                                                                                                                                                                                                                                                                                                                                                                                                                                                                                                                                                                                                                                                                                                                                                                                                                                                                                  |  |   |   |      |                                       |  |     |                                                                                         |  |      |                                                                                                                                                                                                                                                                                                                                                                                                                                                                                                        |                                                                                                                                                                                                                                                                                                                                            |              |                                                  |  |     |   |  |       |            |  |                   |   |  |           |   |  |                                                                                                                                                                                                                                                                                                                                                                                                                                                                                                                                                                                                                                                                                                                                                                                                                                                                                                                                                                 |                                                                                                           |
| When and How Much  | Flexible, up to 12 free sessions                                                                                                                                                                                                                                                                                                                                                                                                                                                                       |                                                                                                                                                                                                                                                                                                                                                                                                                                                                                                                                                                                                                                                                                                                                                                                                                                                                                                                                                                                                                                                                                                     |                                                                                                                               |                                                                                                                                                                                                                                                                                                                                                                                                                                                                                                      |             |                                                                    |          |                                                                                                                                                                                                                                                                                                                 |                                                                                                                                                                                                                                        |                                                                                                        |     |                    |              |      |                   |               |      |       |           |         |      |                                                                                                                                                                                                                                                                                                                                                                                                                                                                                 |                    |                                                                                                             |              |                       |                   |              |       |   |                   |                                  |           |              |                                                                                                |                                                                                                                                                                                                                                                                                                                                                                                                                                                                                                                                                                                                                                                                                                                                                                                                                                                                                                                                                                                                                                                                                                                                                                                                                                                                                                                                                                                                                                                                                                                                                                                  |  |   |   |      |                                       |  |     |                                                                                         |  |      |                                                                                                                                                                                                                                                                                                                                                                                                                                                                                                        |                                                                                                                                                                                                                                                                                                                                            |              |                                                  |  |     |   |  |       |            |  |                   |   |  |           |   |  |                                                                                                                                                                                                                                                                                                                                                                                                                                                                                                                                                                                                                                                                                                                                                                                                                                                                                                                                                                 |                                                                                                           |
| Tailoring          | Personalized                                                                                                                                                                                                                                                                                                                                                                                                                                                                                           |                                                                                                                                                                                                                                                                                                                                                                                                                                                                                                                                                                                                                                                                                                                                                                                                                                                                                                                                                                                                                                                                                                     |                                                                                                                               |                                                                                                                                                                                                                                                                                                                                                                                                                                                                                                      |             |                                                                    |          |                                                                                                                                                                                                                                                                                                                 |                                                                                                                                                                                                                                        |                                                                                                        |     |                    |              |      |                   |               |      |       |           |         |      |                                                                                                                                                                                                                                                                                                                                                                                                                                                                                 |                    |                                                                                                             |              |                       |                   |              |       |   |                   |                                  |           |              |                                                                                                |                                                                                                                                                                                                                                                                                                                                                                                                                                                                                                                                                                                                                                                                                                                                                                                                                                                                                                                                                                                                                                                                                                                                                                                                                                                                                                                                                                                                                                                                                                                                                                                  |  |   |   |      |                                       |  |     |                                                                                         |  |      |                                                                                                                                                                                                                                                                                                                                                                                                                                                                                                        |                                                                                                                                                                                                                                                                                                                                            |              |                                                  |  |     |   |  |       |            |  |                   |   |  |           |   |  |                                                                                                                                                                                                                                                                                                                                                                                                                                                                                                                                                                                                                                                                                                                                                                                                                                                                                                                                                                 |                                                                                                           |
| Polley 2019 (84)   | <p>Uncontrolled before-and-after study, non-randomized controlled design for process of care measures mixed-methods</p> <p>Study length: 25 months</p>                                                                                                                                                                                                                                                                                                                                                 | <p><b>Inclusion criteria:</b></p> <p>Initially the inclusion criteria was agreed as systematic referral of people at risk of CVD, i.e. Qrisk2 score of <math>\geq 10\%</math> and opportunistic referral of people who were socially isolated or lonely. Later on, the inclusion criteria of the opportunistic group was widened.</p> <p><b>Exclusion criteria:</b> -</p> <p>Baseline characteristics:</p> <table border="1"> <thead> <tr> <th></th> <th></th> <th>I</th> <th>C</th> </tr> </thead> <tbody> <tr> <td>N</td> <td></td> <td>134</td> <td>85</td> </tr> <tr> <td>Age</td> <td>Mean (SD)</td> <td>61.31 (12.6)</td> <td>63.3</td> </tr> <tr> <td>Gender</td> <td>Female %</td> <td>53</td> <td>47</td> </tr> <tr> <td>Ethnicity</td> <td>White %</td> <td>97.7</td> <td>-</td> </tr> <tr> <td>Living arrangement</td> <td>-</td> <td>-</td> <td>-</td> </tr> <tr> <td>Employment status</td> <td>Unemployed %</td> <td>17</td> <td>-</td> </tr> <tr> <td>Other</td> <td>Systematic referral %</td> <td>67</td> <td>-</td> </tr> </tbody> </table> <p>Population: Special (CVD risk)</p> |                                                                                                                               |                                                                                                                                                                                                                                                                                                                                                                                                                                                                                                      | I           | C                                                                  | N        |                                                                                                                                                                                                                                                                                                                 | 134                                                                                                                                                                                                                                    | 85                                                                                                     | Age | Mean (SD)          | 61.31 (12.6) | 63.3 | Gender            | Female %      | 53   | 47    | Ethnicity | White % | 97.7 | -                                                                                                                                                                                                                                                                                                                                                                                                                                                                               | Living arrangement | -                                                                                                           | -            | -                     | Employment status | Unemployed % | 17    | - | Other             | Systematic referral %            | 67        | -            | <p>Primary Care, Primary Care, GP surgeries</p> <p>Country: UK (Shropshire, West Midlands)</p> | <table border="1"> <thead> <tr> <th></th> <th>I</th> <th>C</th> </tr> </thead> <tbody> <tr> <td>Name</td> <td>Shropshire social prescribing service</td> <td></td> </tr> <tr> <td>Why</td> <td>Improve long term health and wellbeing, reduce health inequalities within the community</td> <td></td> </tr> <tr> <td>What</td> <td>Invited by a letter from their GP practice, contacted by the social prescribing advisor. Offered an appointment to review ways of reducing their risk of CVD in the future. Secondly, individuals who met any of the Social Prescribing Service eligibility criteria (loneliness, mental health issues, long term conditions) could also be opportunistically referred via the GP surgeries as well as organisations such as Job centres, and Oswestry library. Referral to a number of organizations.</td> <td> <p>Anonymous patient records who had a CVD</p> <p>Qrisk2 score of 10% or more. They were matched to by age and gender to the social prescribing group. Control patients may have been invited to use the social prescribing service and not attended or might not have been included in the initial retrospective list of invitations.</p> </td> </tr> <tr> <td>Who provided</td> <td>Social prescribing advisor = non-clinical person</td> <td></td> </tr> <tr> <td>How</td> <td>-</td> <td></td> </tr> <tr> <td>Where</td> <td>GP surgery</td> <td></td> </tr> <tr> <td>When and How Much</td> <td>-</td> <td></td> </tr> <tr> <td>Tailoring</td> <td>-</td> <td></td> </tr> </tbody> </table> <p>Intervention: Medium</p> |  | I | C | Name | Shropshire social prescribing service |  | Why | Improve long term health and wellbeing, reduce health inequalities within the community |  | What | Invited by a letter from their GP practice, contacted by the social prescribing advisor. Offered an appointment to review ways of reducing their risk of CVD in the future. Secondly, individuals who met any of the Social Prescribing Service eligibility criteria (loneliness, mental health issues, long term conditions) could also be opportunistically referred via the GP surgeries as well as organisations such as Job centres, and Oswestry library. Referral to a number of organizations. | <p>Anonymous patient records who had a CVD</p> <p>Qrisk2 score of 10% or more. They were matched to by age and gender to the social prescribing group. Control patients may have been invited to use the social prescribing service and not attended or might not have been included in the initial retrospective list of invitations.</p> | Who provided | Social prescribing advisor = non-clinical person |  | How | - |  | Where | GP surgery |  | When and How Much | - |  | Tailoring | - |  | <p>Patient outcomes at Baseline and 3 months follow-up via questionnaire:</p> <ul style="list-style-type: none"> <li>- Measure Yourself Concerns and Wellbeing (MYCaW)</li> <li>- Patient Activation Measure questionnaire (PAM)</li> <li>- De Jong Gierveld Loneliness Scale</li> </ul> <p>At Baseline and 3 months follow-up at GP surgeries:</p> <ul style="list-style-type: none"> <li>- Physiological data (e.g. blood pressure, cholesterol)</li> </ul> <p>Process of care measures 3 months before and after referral compared to matched control:</p> <ul style="list-style-type: none"> <li>- Health services use (GP, Nurse, Unplanned, Inpatient, Outpatient, Total)</li> </ul> <p>At Baseline and 3 months follow-up via questionnaire.</p> <ul style="list-style-type: none"> <li>- Hours worked</li> <li>- Days Ill</li> <li>- Weeks unemployed</li> </ul> <p>Satisfaction with service at follow-up, anonymously via separate questionnaire.</p> | <p>Peer-Review: No</p> <p>Funding source: Shropshire Council</p> <p>Declarations of interest: Unknown</p> |
|                    |                                                                                                                                                                                                                                                                                                                                                                                                                                                                                                        | I                                                                                                                                                                                                                                                                                                                                                                                                                                                                                                                                                                                                                                                                                                                                                                                                                                                                                                                                                                                                                                                                                                   | C                                                                                                                             |                                                                                                                                                                                                                                                                                                                                                                                                                                                                                                      |             |                                                                    |          |                                                                                                                                                                                                                                                                                                                 |                                                                                                                                                                                                                                        |                                                                                                        |     |                    |              |      |                   |               |      |       |           |         |      |                                                                                                                                                                                                                                                                                                                                                                                                                                                                                 |                    |                                                                                                             |              |                       |                   |              |       |   |                   |                                  |           |              |                                                                                                |                                                                                                                                                                                                                                                                                                                                                                                                                                                                                                                                                                                                                                                                                                                                                                                                                                                                                                                                                                                                                                                                                                                                                                                                                                                                                                                                                                                                                                                                                                                                                                                  |  |   |   |      |                                       |  |     |                                                                                         |  |      |                                                                                                                                                                                                                                                                                                                                                                                                                                                                                                        |                                                                                                                                                                                                                                                                                                                                            |              |                                                  |  |     |   |  |       |            |  |                   |   |  |           |   |  |                                                                                                                                                                                                                                                                                                                                                                                                                                                                                                                                                                                                                                                                                                                                                                                                                                                                                                                                                                 |                                                                                                           |
| N                  |                                                                                                                                                                                                                                                                                                                                                                                                                                                                                                        | 134                                                                                                                                                                                                                                                                                                                                                                                                                                                                                                                                                                                                                                                                                                                                                                                                                                                                                                                                                                                                                                                                                                 | 85                                                                                                                            |                                                                                                                                                                                                                                                                                                                                                                                                                                                                                                      |             |                                                                    |          |                                                                                                                                                                                                                                                                                                                 |                                                                                                                                                                                                                                        |                                                                                                        |     |                    |              |      |                   |               |      |       |           |         |      |                                                                                                                                                                                                                                                                                                                                                                                                                                                                                 |                    |                                                                                                             |              |                       |                   |              |       |   |                   |                                  |           |              |                                                                                                |                                                                                                                                                                                                                                                                                                                                                                                                                                                                                                                                                                                                                                                                                                                                                                                                                                                                                                                                                                                                                                                                                                                                                                                                                                                                                                                                                                                                                                                                                                                                                                                  |  |   |   |      |                                       |  |     |                                                                                         |  |      |                                                                                                                                                                                                                                                                                                                                                                                                                                                                                                        |                                                                                                                                                                                                                                                                                                                                            |              |                                                  |  |     |   |  |       |            |  |                   |   |  |           |   |  |                                                                                                                                                                                                                                                                                                                                                                                                                                                                                                                                                                                                                                                                                                                                                                                                                                                                                                                                                                 |                                                                                                           |
| Age                | Mean (SD)                                                                                                                                                                                                                                                                                                                                                                                                                                                                                              | 61.31 (12.6)                                                                                                                                                                                                                                                                                                                                                                                                                                                                                                                                                                                                                                                                                                                                                                                                                                                                                                                                                                                                                                                                                        | 63.3                                                                                                                          |                                                                                                                                                                                                                                                                                                                                                                                                                                                                                                      |             |                                                                    |          |                                                                                                                                                                                                                                                                                                                 |                                                                                                                                                                                                                                        |                                                                                                        |     |                    |              |      |                   |               |      |       |           |         |      |                                                                                                                                                                                                                                                                                                                                                                                                                                                                                 |                    |                                                                                                             |              |                       |                   |              |       |   |                   |                                  |           |              |                                                                                                |                                                                                                                                                                                                                                                                                                                                                                                                                                                                                                                                                                                                                                                                                                                                                                                                                                                                                                                                                                                                                                                                                                                                                                                                                                                                                                                                                                                                                                                                                                                                                                                  |  |   |   |      |                                       |  |     |                                                                                         |  |      |                                                                                                                                                                                                                                                                                                                                                                                                                                                                                                        |                                                                                                                                                                                                                                                                                                                                            |              |                                                  |  |     |   |  |       |            |  |                   |   |  |           |   |  |                                                                                                                                                                                                                                                                                                                                                                                                                                                                                                                                                                                                                                                                                                                                                                                                                                                                                                                                                                 |                                                                                                           |
| Gender             | Female %                                                                                                                                                                                                                                                                                                                                                                                                                                                                                               | 53                                                                                                                                                                                                                                                                                                                                                                                                                                                                                                                                                                                                                                                                                                                                                                                                                                                                                                                                                                                                                                                                                                  | 47                                                                                                                            |                                                                                                                                                                                                                                                                                                                                                                                                                                                                                                      |             |                                                                    |          |                                                                                                                                                                                                                                                                                                                 |                                                                                                                                                                                                                                        |                                                                                                        |     |                    |              |      |                   |               |      |       |           |         |      |                                                                                                                                                                                                                                                                                                                                                                                                                                                                                 |                    |                                                                                                             |              |                       |                   |              |       |   |                   |                                  |           |              |                                                                                                |                                                                                                                                                                                                                                                                                                                                                                                                                                                                                                                                                                                                                                                                                                                                                                                                                                                                                                                                                                                                                                                                                                                                                                                                                                                                                                                                                                                                                                                                                                                                                                                  |  |   |   |      |                                       |  |     |                                                                                         |  |      |                                                                                                                                                                                                                                                                                                                                                                                                                                                                                                        |                                                                                                                                                                                                                                                                                                                                            |              |                                                  |  |     |   |  |       |            |  |                   |   |  |           |   |  |                                                                                                                                                                                                                                                                                                                                                                                                                                                                                                                                                                                                                                                                                                                                                                                                                                                                                                                                                                 |                                                                                                           |
| Ethnicity          | White %                                                                                                                                                                                                                                                                                                                                                                                                                                                                                                | 97.7                                                                                                                                                                                                                                                                                                                                                                                                                                                                                                                                                                                                                                                                                                                                                                                                                                                                                                                                                                                                                                                                                                | -                                                                                                                             |                                                                                                                                                                                                                                                                                                                                                                                                                                                                                                      |             |                                                                    |          |                                                                                                                                                                                                                                                                                                                 |                                                                                                                                                                                                                                        |                                                                                                        |     |                    |              |      |                   |               |      |       |           |         |      |                                                                                                                                                                                                                                                                                                                                                                                                                                                                                 |                    |                                                                                                             |              |                       |                   |              |       |   |                   |                                  |           |              |                                                                                                |                                                                                                                                                                                                                                                                                                                                                                                                                                                                                                                                                                                                                                                                                                                                                                                                                                                                                                                                                                                                                                                                                                                                                                                                                                                                                                                                                                                                                                                                                                                                                                                  |  |   |   |      |                                       |  |     |                                                                                         |  |      |                                                                                                                                                                                                                                                                                                                                                                                                                                                                                                        |                                                                                                                                                                                                                                                                                                                                            |              |                                                  |  |     |   |  |       |            |  |                   |   |  |           |   |  |                                                                                                                                                                                                                                                                                                                                                                                                                                                                                                                                                                                                                                                                                                                                                                                                                                                                                                                                                                 |                                                                                                           |
| Living arrangement | -                                                                                                                                                                                                                                                                                                                                                                                                                                                                                                      | -                                                                                                                                                                                                                                                                                                                                                                                                                                                                                                                                                                                                                                                                                                                                                                                                                                                                                                                                                                                                                                                                                                   | -                                                                                                                             |                                                                                                                                                                                                                                                                                                                                                                                                                                                                                                      |             |                                                                    |          |                                                                                                                                                                                                                                                                                                                 |                                                                                                                                                                                                                                        |                                                                                                        |     |                    |              |      |                   |               |      |       |           |         |      |                                                                                                                                                                                                                                                                                                                                                                                                                                                                                 |                    |                                                                                                             |              |                       |                   |              |       |   |                   |                                  |           |              |                                                                                                |                                                                                                                                                                                                                                                                                                                                                                                                                                                                                                                                                                                                                                                                                                                                                                                                                                                                                                                                                                                                                                                                                                                                                                                                                                                                                                                                                                                                                                                                                                                                                                                  |  |   |   |      |                                       |  |     |                                                                                         |  |      |                                                                                                                                                                                                                                                                                                                                                                                                                                                                                                        |                                                                                                                                                                                                                                                                                                                                            |              |                                                  |  |     |   |  |       |            |  |                   |   |  |           |   |  |                                                                                                                                                                                                                                                                                                                                                                                                                                                                                                                                                                                                                                                                                                                                                                                                                                                                                                                                                                 |                                                                                                           |
| Employment status  | Unemployed %                                                                                                                                                                                                                                                                                                                                                                                                                                                                                           | 17                                                                                                                                                                                                                                                                                                                                                                                                                                                                                                                                                                                                                                                                                                                                                                                                                                                                                                                                                                                                                                                                                                  | -                                                                                                                             |                                                                                                                                                                                                                                                                                                                                                                                                                                                                                                      |             |                                                                    |          |                                                                                                                                                                                                                                                                                                                 |                                                                                                                                                                                                                                        |                                                                                                        |     |                    |              |      |                   |               |      |       |           |         |      |                                                                                                                                                                                                                                                                                                                                                                                                                                                                                 |                    |                                                                                                             |              |                       |                   |              |       |   |                   |                                  |           |              |                                                                                                |                                                                                                                                                                                                                                                                                                                                                                                                                                                                                                                                                                                                                                                                                                                                                                                                                                                                                                                                                                                                                                                                                                                                                                                                                                                                                                                                                                                                                                                                                                                                                                                  |  |   |   |      |                                       |  |     |                                                                                         |  |      |                                                                                                                                                                                                                                                                                                                                                                                                                                                                                                        |                                                                                                                                                                                                                                                                                                                                            |              |                                                  |  |     |   |  |       |            |  |                   |   |  |           |   |  |                                                                                                                                                                                                                                                                                                                                                                                                                                                                                                                                                                                                                                                                                                                                                                                                                                                                                                                                                                 |                                                                                                           |
| Other              | Systematic referral %                                                                                                                                                                                                                                                                                                                                                                                                                                                                                  | 67                                                                                                                                                                                                                                                                                                                                                                                                                                                                                                                                                                                                                                                                                                                                                                                                                                                                                                                                                                                                                                                                                                  | -                                                                                                                             |                                                                                                                                                                                                                                                                                                                                                                                                                                                                                                      |             |                                                                    |          |                                                                                                                                                                                                                                                                                                                 |                                                                                                                                                                                                                                        |                                                                                                        |     |                    |              |      |                   |               |      |       |           |         |      |                                                                                                                                                                                                                                                                                                                                                                                                                                                                                 |                    |                                                                                                             |              |                       |                   |              |       |   |                   |                                  |           |              |                                                                                                |                                                                                                                                                                                                                                                                                                                                                                                                                                                                                                                                                                                                                                                                                                                                                                                                                                                                                                                                                                                                                                                                                                                                                                                                                                                                                                                                                                                                                                                                                                                                                                                  |  |   |   |      |                                       |  |     |                                                                                         |  |      |                                                                                                                                                                                                                                                                                                                                                                                                                                                                                                        |                                                                                                                                                                                                                                                                                                                                            |              |                                                  |  |     |   |  |       |            |  |                   |   |  |           |   |  |                                                                                                                                                                                                                                                                                                                                                                                                                                                                                                                                                                                                                                                                                                                                                                                                                                                                                                                                                                 |                                                                                                           |
|                    | I                                                                                                                                                                                                                                                                                                                                                                                                                                                                                                      | C                                                                                                                                                                                                                                                                                                                                                                                                                                                                                                                                                                                                                                                                                                                                                                                                                                                                                                                                                                                                                                                                                                   |                                                                                                                               |                                                                                                                                                                                                                                                                                                                                                                                                                                                                                                      |             |                                                                    |          |                                                                                                                                                                                                                                                                                                                 |                                                                                                                                                                                                                                        |                                                                                                        |     |                    |              |      |                   |               |      |       |           |         |      |                                                                                                                                                                                                                                                                                                                                                                                                                                                                                 |                    |                                                                                                             |              |                       |                   |              |       |   |                   |                                  |           |              |                                                                                                |                                                                                                                                                                                                                                                                                                                                                                                                                                                                                                                                                                                                                                                                                                                                                                                                                                                                                                                                                                                                                                                                                                                                                                                                                                                                                                                                                                                                                                                                                                                                                                                  |  |   |   |      |                                       |  |     |                                                                                         |  |      |                                                                                                                                                                                                                                                                                                                                                                                                                                                                                                        |                                                                                                                                                                                                                                                                                                                                            |              |                                                  |  |     |   |  |       |            |  |                   |   |  |           |   |  |                                                                                                                                                                                                                                                                                                                                                                                                                                                                                                                                                                                                                                                                                                                                                                                                                                                                                                                                                                 |                                                                                                           |
| Name               | Shropshire social prescribing service                                                                                                                                                                                                                                                                                                                                                                                                                                                                  |                                                                                                                                                                                                                                                                                                                                                                                                                                                                                                                                                                                                                                                                                                                                                                                                                                                                                                                                                                                                                                                                                                     |                                                                                                                               |                                                                                                                                                                                                                                                                                                                                                                                                                                                                                                      |             |                                                                    |          |                                                                                                                                                                                                                                                                                                                 |                                                                                                                                                                                                                                        |                                                                                                        |     |                    |              |      |                   |               |      |       |           |         |      |                                                                                                                                                                                                                                                                                                                                                                                                                                                                                 |                    |                                                                                                             |              |                       |                   |              |       |   |                   |                                  |           |              |                                                                                                |                                                                                                                                                                                                                                                                                                                                                                                                                                                                                                                                                                                                                                                                                                                                                                                                                                                                                                                                                                                                                                                                                                                                                                                                                                                                                                                                                                                                                                                                                                                                                                                  |  |   |   |      |                                       |  |     |                                                                                         |  |      |                                                                                                                                                                                                                                                                                                                                                                                                                                                                                                        |                                                                                                                                                                                                                                                                                                                                            |              |                                                  |  |     |   |  |       |            |  |                   |   |  |           |   |  |                                                                                                                                                                                                                                                                                                                                                                                                                                                                                                                                                                                                                                                                                                                                                                                                                                                                                                                                                                 |                                                                                                           |
| Why                | Improve long term health and wellbeing, reduce health inequalities within the community                                                                                                                                                                                                                                                                                                                                                                                                                |                                                                                                                                                                                                                                                                                                                                                                                                                                                                                                                                                                                                                                                                                                                                                                                                                                                                                                                                                                                                                                                                                                     |                                                                                                                               |                                                                                                                                                                                                                                                                                                                                                                                                                                                                                                      |             |                                                                    |          |                                                                                                                                                                                                                                                                                                                 |                                                                                                                                                                                                                                        |                                                                                                        |     |                    |              |      |                   |               |      |       |           |         |      |                                                                                                                                                                                                                                                                                                                                                                                                                                                                                 |                    |                                                                                                             |              |                       |                   |              |       |   |                   |                                  |           |              |                                                                                                |                                                                                                                                                                                                                                                                                                                                                                                                                                                                                                                                                                                                                                                                                                                                                                                                                                                                                                                                                                                                                                                                                                                                                                                                                                                                                                                                                                                                                                                                                                                                                                                  |  |   |   |      |                                       |  |     |                                                                                         |  |      |                                                                                                                                                                                                                                                                                                                                                                                                                                                                                                        |                                                                                                                                                                                                                                                                                                                                            |              |                                                  |  |     |   |  |       |            |  |                   |   |  |           |   |  |                                                                                                                                                                                                                                                                                                                                                                                                                                                                                                                                                                                                                                                                                                                                                                                                                                                                                                                                                                 |                                                                                                           |
| What               | Invited by a letter from their GP practice, contacted by the social prescribing advisor. Offered an appointment to review ways of reducing their risk of CVD in the future. Secondly, individuals who met any of the Social Prescribing Service eligibility criteria (loneliness, mental health issues, long term conditions) could also be opportunistically referred via the GP surgeries as well as organisations such as Job centres, and Oswestry library. Referral to a number of organizations. | <p>Anonymous patient records who had a CVD</p> <p>Qrisk2 score of 10% or more. They were matched to by age and gender to the social prescribing group. Control patients may have been invited to use the social prescribing service and not attended or might not have been included in the initial retrospective list of invitations.</p>                                                                                                                                                                                                                                                                                                                                                                                                                                                                                                                                                                                                                                                                                                                                                          |                                                                                                                               |                                                                                                                                                                                                                                                                                                                                                                                                                                                                                                      |             |                                                                    |          |                                                                                                                                                                                                                                                                                                                 |                                                                                                                                                                                                                                        |                                                                                                        |     |                    |              |      |                   |               |      |       |           |         |      |                                                                                                                                                                                                                                                                                                                                                                                                                                                                                 |                    |                                                                                                             |              |                       |                   |              |       |   |                   |                                  |           |              |                                                                                                |                                                                                                                                                                                                                                                                                                                                                                                                                                                                                                                                                                                                                                                                                                                                                                                                                                                                                                                                                                                                                                                                                                                                                                                                                                                                                                                                                                                                                                                                                                                                                                                  |  |   |   |      |                                       |  |     |                                                                                         |  |      |                                                                                                                                                                                                                                                                                                                                                                                                                                                                                                        |                                                                                                                                                                                                                                                                                                                                            |              |                                                  |  |     |   |  |       |            |  |                   |   |  |           |   |  |                                                                                                                                                                                                                                                                                                                                                                                                                                                                                                                                                                                                                                                                                                                                                                                                                                                                                                                                                                 |                                                                                                           |
| Who provided       | Social prescribing advisor = non-clinical person                                                                                                                                                                                                                                                                                                                                                                                                                                                       |                                                                                                                                                                                                                                                                                                                                                                                                                                                                                                                                                                                                                                                                                                                                                                                                                                                                                                                                                                                                                                                                                                     |                                                                                                                               |                                                                                                                                                                                                                                                                                                                                                                                                                                                                                                      |             |                                                                    |          |                                                                                                                                                                                                                                                                                                                 |                                                                                                                                                                                                                                        |                                                                                                        |     |                    |              |      |                   |               |      |       |           |         |      |                                                                                                                                                                                                                                                                                                                                                                                                                                                                                 |                    |                                                                                                             |              |                       |                   |              |       |   |                   |                                  |           |              |                                                                                                |                                                                                                                                                                                                                                                                                                                                                                                                                                                                                                                                                                                                                                                                                                                                                                                                                                                                                                                                                                                                                                                                                                                                                                                                                                                                                                                                                                                                                                                                                                                                                                                  |  |   |   |      |                                       |  |     |                                                                                         |  |      |                                                                                                                                                                                                                                                                                                                                                                                                                                                                                                        |                                                                                                                                                                                                                                                                                                                                            |              |                                                  |  |     |   |  |       |            |  |                   |   |  |           |   |  |                                                                                                                                                                                                                                                                                                                                                                                                                                                                                                                                                                                                                                                                                                                                                                                                                                                                                                                                                                 |                                                                                                           |
| How                | -                                                                                                                                                                                                                                                                                                                                                                                                                                                                                                      |                                                                                                                                                                                                                                                                                                                                                                                                                                                                                                                                                                                                                                                                                                                                                                                                                                                                                                                                                                                                                                                                                                     |                                                                                                                               |                                                                                                                                                                                                                                                                                                                                                                                                                                                                                                      |             |                                                                    |          |                                                                                                                                                                                                                                                                                                                 |                                                                                                                                                                                                                                        |                                                                                                        |     |                    |              |      |                   |               |      |       |           |         |      |                                                                                                                                                                                                                                                                                                                                                                                                                                                                                 |                    |                                                                                                             |              |                       |                   |              |       |   |                   |                                  |           |              |                                                                                                |                                                                                                                                                                                                                                                                                                                                                                                                                                                                                                                                                                                                                                                                                                                                                                                                                                                                                                                                                                                                                                                                                                                                                                                                                                                                                                                                                                                                                                                                                                                                                                                  |  |   |   |      |                                       |  |     |                                                                                         |  |      |                                                                                                                                                                                                                                                                                                                                                                                                                                                                                                        |                                                                                                                                                                                                                                                                                                                                            |              |                                                  |  |     |   |  |       |            |  |                   |   |  |           |   |  |                                                                                                                                                                                                                                                                                                                                                                                                                                                                                                                                                                                                                                                                                                                                                                                                                                                                                                                                                                 |                                                                                                           |
| Where              | GP surgery                                                                                                                                                                                                                                                                                                                                                                                                                                                                                             |                                                                                                                                                                                                                                                                                                                                                                                                                                                                                                                                                                                                                                                                                                                                                                                                                                                                                                                                                                                                                                                                                                     |                                                                                                                               |                                                                                                                                                                                                                                                                                                                                                                                                                                                                                                      |             |                                                                    |          |                                                                                                                                                                                                                                                                                                                 |                                                                                                                                                                                                                                        |                                                                                                        |     |                    |              |      |                   |               |      |       |           |         |      |                                                                                                                                                                                                                                                                                                                                                                                                                                                                                 |                    |                                                                                                             |              |                       |                   |              |       |   |                   |                                  |           |              |                                                                                                |                                                                                                                                                                                                                                                                                                                                                                                                                                                                                                                                                                                                                                                                                                                                                                                                                                                                                                                                                                                                                                                                                                                                                                                                                                                                                                                                                                                                                                                                                                                                                                                  |  |   |   |      |                                       |  |     |                                                                                         |  |      |                                                                                                                                                                                                                                                                                                                                                                                                                                                                                                        |                                                                                                                                                                                                                                                                                                                                            |              |                                                  |  |     |   |  |       |            |  |                   |   |  |           |   |  |                                                                                                                                                                                                                                                                                                                                                                                                                                                                                                                                                                                                                                                                                                                                                                                                                                                                                                                                                                 |                                                                                                           |
| When and How Much  | -                                                                                                                                                                                                                                                                                                                                                                                                                                                                                                      |                                                                                                                                                                                                                                                                                                                                                                                                                                                                                                                                                                                                                                                                                                                                                                                                                                                                                                                                                                                                                                                                                                     |                                                                                                                               |                                                                                                                                                                                                                                                                                                                                                                                                                                                                                                      |             |                                                                    |          |                                                                                                                                                                                                                                                                                                                 |                                                                                                                                                                                                                                        |                                                                                                        |     |                    |              |      |                   |               |      |       |           |         |      |                                                                                                                                                                                                                                                                                                                                                                                                                                                                                 |                    |                                                                                                             |              |                       |                   |              |       |   |                   |                                  |           |              |                                                                                                |                                                                                                                                                                                                                                                                                                                                                                                                                                                                                                                                                                                                                                                                                                                                                                                                                                                                                                                                                                                                                                                                                                                                                                                                                                                                                                                                                                                                                                                                                                                                                                                  |  |   |   |      |                                       |  |     |                                                                                         |  |      |                                                                                                                                                                                                                                                                                                                                                                                                                                                                                                        |                                                                                                                                                                                                                                                                                                                                            |              |                                                  |  |     |   |  |       |            |  |                   |   |  |           |   |  |                                                                                                                                                                                                                                                                                                                                                                                                                                                                                                                                                                                                                                                                                                                                                                                                                                                                                                                                                                 |                                                                                                           |
| Tailoring          | -                                                                                                                                                                                                                                                                                                                                                                                                                                                                                                      |                                                                                                                                                                                                                                                                                                                                                                                                                                                                                                                                                                                                                                                                                                                                                                                                                                                                                                                                                                                                                                                                                                     |                                                                                                                               |                                                                                                                                                                                                                                                                                                                                                                                                                                                                                                      |             |                                                                    |          |                                                                                                                                                                                                                                                                                                                 |                                                                                                                                                                                                                                        |                                                                                                        |     |                    |              |      |                   |               |      |       |           |         |      |                                                                                                                                                                                                                                                                                                                                                                                                                                                                                 |                    |                                                                                                             |              |                       |                   |              |       |   |                   |                                  |           |              |                                                                                                |                                                                                                                                                                                                                                                                                                                                                                                                                                                                                                                                                                                                                                                                                                                                                                                                                                                                                                                                                                                                                                                                                                                                                                                                                                                                                                                                                                                                                                                                                                                                                                                  |  |   |   |      |                                       |  |     |                                                                                         |  |      |                                                                                                                                                                                                                                                                                                                                                                                                                                                                                                        |                                                                                                                                                                                                                                                                                                                                            |              |                                                  |  |     |   |  |       |            |  |                   |   |  |           |   |  |                                                                                                                                                                                                                                                                                                                                                                                                                                                                                                                                                                                                                                                                                                                                                                                                                                                                                                                                                                 |                                                                                                           |
| Smith 2017 (85)    | <p>Uncontrolled before-and-after study, mixed-methods</p> <p>Study length: 17 months</p>                                                                                                                                                                                                                                                                                                                                                                                                               | <p><b>Inclusion criteria:</b></p> <p>Patients with nonmedical issues, such as social isolation, from GPs who feel the patient could benefit from accessing interventions within the voluntary sector, open to any individual over the age of 18 regardless of their age, gender or medical and social issues</p> <p><b>Exclusion criteria:</b> -</p> <p>Baseline characteristics:</p>                                                                                                                                                                                                                                                                                                                                                                                                                                                                                                                                                                                                                                                                                                               | <p>Primary Care, GP surgeries, Social prescribing clinic</p> <p>Country: UK (Loughborough, Leicestershire, East Midlands)</p> | <table border="1"> <tbody> <tr> <td>Name</td> <td>Voluntary Action LeicesterShire's (VAL) social prescribing service</td> </tr> <tr> <td>Why</td> <td> <p>Social Prescribing aims to:</p> <ol style="list-style-type: none"> <li>1. Improve the health and wellbeing of vulnerable adults who are frequent attendees at GP practices</li> <li>2. Reduce unnecessary repeat appointments thereby saving time and money for GP practices / healthcare systems</li> </ol> </td> </tr> </tbody> </table> | Name        | Voluntary Action LeicesterShire's (VAL) social prescribing service | Why      | <p>Social Prescribing aims to:</p> <ol style="list-style-type: none"> <li>1. Improve the health and wellbeing of vulnerable adults who are frequent attendees at GP practices</li> <li>2. Reduce unnecessary repeat appointments thereby saving time and money for GP practices / healthcare systems</li> </ol> | <p>Patient outcomes at baseline and unknown follow-up (after referral) via questionnaire:</p> <ul style="list-style-type: none"> <li>- Short Warwick and Edinburgh Mental Wellbeing scale</li> </ul> <p>Process of care measures 6</p> | <p>Peer-Review: No</p> <p>Funding source: West Leicestershire Clinical Commissioning Group (WLCCG)</p> |     |                    |              |      |                   |               |      |       |           |         |      |                                                                                                                                                                                                                                                                                                                                                                                                                                                                                 |                    |                                                                                                             |              |                       |                   |              |       |   |                   |                                  |           |              |                                                                                                |                                                                                                                                                                                                                                                                                                                                                                                                                                                                                                                                                                                                                                                                                                                                                                                                                                                                                                                                                                                                                                                                                                                                                                                                                                                                                                                                                                                                                                                                                                                                                                                  |  |   |   |      |                                       |  |     |                                                                                         |  |      |                                                                                                                                                                                                                                                                                                                                                                                                                                                                                                        |                                                                                                                                                                                                                                                                                                                                            |              |                                                  |  |     |   |  |       |            |  |                   |   |  |           |   |  |                                                                                                                                                                                                                                                                                                                                                                                                                                                                                                                                                                                                                                                                                                                                                                                                                                                                                                                                                                 |                                                                                                           |
| Name               | Voluntary Action LeicesterShire's (VAL) social prescribing service                                                                                                                                                                                                                                                                                                                                                                                                                                     |                                                                                                                                                                                                                                                                                                                                                                                                                                                                                                                                                                                                                                                                                                                                                                                                                                                                                                                                                                                                                                                                                                     |                                                                                                                               |                                                                                                                                                                                                                                                                                                                                                                                                                                                                                                      |             |                                                                    |          |                                                                                                                                                                                                                                                                                                                 |                                                                                                                                                                                                                                        |                                                                                                        |     |                    |              |      |                   |               |      |       |           |         |      |                                                                                                                                                                                                                                                                                                                                                                                                                                                                                 |                    |                                                                                                             |              |                       |                   |              |       |   |                   |                                  |           |              |                                                                                                |                                                                                                                                                                                                                                                                                                                                                                                                                                                                                                                                                                                                                                                                                                                                                                                                                                                                                                                                                                                                                                                                                                                                                                                                                                                                                                                                                                                                                                                                                                                                                                                  |  |   |   |      |                                       |  |     |                                                                                         |  |      |                                                                                                                                                                                                                                                                                                                                                                                                                                                                                                        |                                                                                                                                                                                                                                                                                                                                            |              |                                                  |  |     |   |  |       |            |  |                   |   |  |           |   |  |                                                                                                                                                                                                                                                                                                                                                                                                                                                                                                                                                                                                                                                                                                                                                                                                                                                                                                                                                                 |                                                                                                           |
| Why                | <p>Social Prescribing aims to:</p> <ol style="list-style-type: none"> <li>1. Improve the health and wellbeing of vulnerable adults who are frequent attendees at GP practices</li> <li>2. Reduce unnecessary repeat appointments thereby saving time and money for GP practices / healthcare systems</li> </ol>                                                                                                                                                                                        |                                                                                                                                                                                                                                                                                                                                                                                                                                                                                                                                                                                                                                                                                                                                                                                                                                                                                                                                                                                                                                                                                                     |                                                                                                                               |                                                                                                                                                                                                                                                                                                                                                                                                                                                                                                      |             |                                                                    |          |                                                                                                                                                                                                                                                                                                                 |                                                                                                                                                                                                                                        |                                                                                                        |     |                    |              |      |                   |               |      |       |           |         |      |                                                                                                                                                                                                                                                                                                                                                                                                                                                                                 |                    |                                                                                                             |              |                       |                   |              |       |   |                   |                                  |           |              |                                                                                                |                                                                                                                                                                                                                                                                                                                                                                                                                                                                                                                                                                                                                                                                                                                                                                                                                                                                                                                                                                                                                                                                                                                                                                                                                                                                                                                                                                                                                                                                                                                                                                                  |  |   |   |      |                                       |  |     |                                                                                         |  |      |                                                                                                                                                                                                                                                                                                                                                                                                                                                                                                        |                                                                                                                                                                                                                                                                                                                                            |              |                                                  |  |     |   |  |       |            |  |                   |   |  |           |   |  |                                                                                                                                                                                                                                                                                                                                                                                                                                                                                                                                                                                                                                                                                                                                                                                                                                                                                                                                                                 |                                                                                                           |



|                     |                                                                                                                                                                                                                                                                                                                                                                                                                                                                                                                                                                                                                                                                    |                                                                                                                                                                                                                                                                                                                                                                                                                                                                                                                                                                            |   |  |    |     |                |            |        |          |    |           |         |    |                    |   |   |                                                                         |                                                                                                                                                                                                                                                                                                                                                                                                                                                                                                                                                                                                                                                                                                                                                                                                                                                                                                                                                                                                                                           |      |                                  |     |                                                                                           |                                                                               |                                                                                                                                                                                                                                                                                                                                                                                                                                                                                                                                                                                                                                                                                                                                                                                                                                                                                                                                                                                                                                                                                                                                                                                                                                                                        |              |                                                                                                                                                                                                                                                                                                                                                                                                                                                                                                                                                                    |                                                                                                                                                                       |                                                                                                                                                      |      |                                                                                                                                                                                                                                                                                                                                                                                                                                                             |              |                                                                                             |                   |                       |           |                                                                                               |                                                                                                                                                                                                                                                                                                             |                                                 |           |   |                                                                                                                                                                     |                                                                                                                                                                                                                                                                                                                   |
|---------------------|--------------------------------------------------------------------------------------------------------------------------------------------------------------------------------------------------------------------------------------------------------------------------------------------------------------------------------------------------------------------------------------------------------------------------------------------------------------------------------------------------------------------------------------------------------------------------------------------------------------------------------------------------------------------|----------------------------------------------------------------------------------------------------------------------------------------------------------------------------------------------------------------------------------------------------------------------------------------------------------------------------------------------------------------------------------------------------------------------------------------------------------------------------------------------------------------------------------------------------------------------------|---|--|----|-----|----------------|------------|--------|----------|----|-----------|---------|----|--------------------|---|---|-------------------------------------------------------------------------|-------------------------------------------------------------------------------------------------------------------------------------------------------------------------------------------------------------------------------------------------------------------------------------------------------------------------------------------------------------------------------------------------------------------------------------------------------------------------------------------------------------------------------------------------------------------------------------------------------------------------------------------------------------------------------------------------------------------------------------------------------------------------------------------------------------------------------------------------------------------------------------------------------------------------------------------------------------------------------------------------------------------------------------------|------|----------------------------------|-----|-------------------------------------------------------------------------------------------|-------------------------------------------------------------------------------|------------------------------------------------------------------------------------------------------------------------------------------------------------------------------------------------------------------------------------------------------------------------------------------------------------------------------------------------------------------------------------------------------------------------------------------------------------------------------------------------------------------------------------------------------------------------------------------------------------------------------------------------------------------------------------------------------------------------------------------------------------------------------------------------------------------------------------------------------------------------------------------------------------------------------------------------------------------------------------------------------------------------------------------------------------------------------------------------------------------------------------------------------------------------------------------------------------------------------------------------------------------------|--------------|--------------------------------------------------------------------------------------------------------------------------------------------------------------------------------------------------------------------------------------------------------------------------------------------------------------------------------------------------------------------------------------------------------------------------------------------------------------------------------------------------------------------------------------------------------------------|-----------------------------------------------------------------------------------------------------------------------------------------------------------------------|------------------------------------------------------------------------------------------------------------------------------------------------------|------|-------------------------------------------------------------------------------------------------------------------------------------------------------------------------------------------------------------------------------------------------------------------------------------------------------------------------------------------------------------------------------------------------------------------------------------------------------------|--------------|---------------------------------------------------------------------------------------------|-------------------|-----------------------|-----------|-----------------------------------------------------------------------------------------------|-------------------------------------------------------------------------------------------------------------------------------------------------------------------------------------------------------------------------------------------------------------------------------------------------------------|-------------------------------------------------|-----------|---|---------------------------------------------------------------------------------------------------------------------------------------------------------------------|-------------------------------------------------------------------------------------------------------------------------------------------------------------------------------------------------------------------------------------------------------------------------------------------------------------------|
|                     |                                                                                                                                                                                                                                                                                                                                                                                                                                                                                                                                                                                                                                                                    | <table border="1"> <tr> <td>N</td> <td></td> <td>63</td> </tr> <tr> <td>Age</td> <td>Mode age group</td> <td>45-54</td> </tr> <tr> <td>Gender</td> <td>-</td> <td>-</td> </tr> <tr> <td>Ethnicity</td> <td>-</td> <td>-</td> </tr> <tr> <td>Living arrangement</td> <td>-</td> <td>-</td> </tr> <tr> <td>Employment status</td> <td>-</td> <td>-</td> </tr> <tr> <td>Other</td> <td>-</td> <td>-</td> </tr> </table> <p>Population: General</p>                                                                                                                            | N |  | 63 | Age | Mode age group | 45-54      | Gender | -        | -  | Ethnicity | -       | -  | Living arrangement | - | - | Employment status                                                       | -                                                                                                                                                                                                                                                                                                                                                                                                                                                                                                                                                                                                                                                                                                                                                                                                                                                                                                                                                                                                                                         | -    | Other                            | -   | -                                                                                         |                                                                               | <table border="1"> <tr> <td>What</td> <td>Creating a formal way for GPs to refer patients with social, emotional or practical needs to a variety of holistic, local, non-clinical services. Social prescribing clinics receive patients with nonmedical issues, such as social isolation, from GPs who feel the patient could benefit from accessing interventions within the voluntary sector, they are discussing their issues in detail with volunteer social prescribers, then referred to local voluntary sector services which can provide the necessary interventions to resolve the patient's issues</td> </tr> <tr> <td>Who provided</td> <td>Volunteers from the Patient Participation Group (PPG)</td> </tr> <tr> <td>How</td> <td>Face-to-face</td> </tr> <tr> <td>Where</td> <td>Within the GP practice</td> </tr> <tr> <td>When and How Much</td> <td>30-minute appointment</td> </tr> <tr> <td>Tailoring</td> <td>Personalized</td> </tr> </table> <p>Intervention: Medium</p>                                                                                                                                                                                                                                                                          | What         | Creating a formal way for GPs to refer patients with social, emotional or practical needs to a variety of holistic, local, non-clinical services. Social prescribing clinics receive patients with nonmedical issues, such as social isolation, from GPs who feel the patient could benefit from accessing interventions within the voluntary sector, they are discussing their issues in detail with volunteer social prescribers, then referred to local voluntary sector services which can provide the necessary interventions to resolve the patient's issues | Who provided                                                                                                                                                          | Volunteers from the Patient Participation Group (PPG)                                                                                                | How  | Face-to-face                                                                                                                                                                                                                                                                                                                                                                                                                                                | Where        | Within the GP practice                                                                      | When and How Much | 30-minute appointment | Tailoring | Personalized                                                                                  | <p>months before and after referral. Subgroup analyses:</p> <ul style="list-style-type: none"> <li>- GP appointments</li> </ul> <p>12months before and after referral. Subgroup analyses:</p> <ul style="list-style-type: none"> <li>- A&amp;E admissions</li> <li>- Social Return on Investment</li> </ul> | <p>Declarations of interest:</p> <p>Unknown</p> |           |   |                                                                                                                                                                     |                                                                                                                                                                                                                                                                                                                   |
| N                   |                                                                                                                                                                                                                                                                                                                                                                                                                                                                                                                                                                                                                                                                    | 63                                                                                                                                                                                                                                                                                                                                                                                                                                                                                                                                                                         |   |  |    |     |                |            |        |          |    |           |         |    |                    |   |   |                                                                         |                                                                                                                                                                                                                                                                                                                                                                                                                                                                                                                                                                                                                                                                                                                                                                                                                                                                                                                                                                                                                                           |      |                                  |     |                                                                                           |                                                                               |                                                                                                                                                                                                                                                                                                                                                                                                                                                                                                                                                                                                                                                                                                                                                                                                                                                                                                                                                                                                                                                                                                                                                                                                                                                                        |              |                                                                                                                                                                                                                                                                                                                                                                                                                                                                                                                                                                    |                                                                                                                                                                       |                                                                                                                                                      |      |                                                                                                                                                                                                                                                                                                                                                                                                                                                             |              |                                                                                             |                   |                       |           |                                                                                               |                                                                                                                                                                                                                                                                                                             |                                                 |           |   |                                                                                                                                                                     |                                                                                                                                                                                                                                                                                                                   |
| Age                 | Mode age group                                                                                                                                                                                                                                                                                                                                                                                                                                                                                                                                                                                                                                                     | 45-54                                                                                                                                                                                                                                                                                                                                                                                                                                                                                                                                                                      |   |  |    |     |                |            |        |          |    |           |         |    |                    |   |   |                                                                         |                                                                                                                                                                                                                                                                                                                                                                                                                                                                                                                                                                                                                                                                                                                                                                                                                                                                                                                                                                                                                                           |      |                                  |     |                                                                                           |                                                                               |                                                                                                                                                                                                                                                                                                                                                                                                                                                                                                                                                                                                                                                                                                                                                                                                                                                                                                                                                                                                                                                                                                                                                                                                                                                                        |              |                                                                                                                                                                                                                                                                                                                                                                                                                                                                                                                                                                    |                                                                                                                                                                       |                                                                                                                                                      |      |                                                                                                                                                                                                                                                                                                                                                                                                                                                             |              |                                                                                             |                   |                       |           |                                                                                               |                                                                                                                                                                                                                                                                                                             |                                                 |           |   |                                                                                                                                                                     |                                                                                                                                                                                                                                                                                                                   |
| Gender              | -                                                                                                                                                                                                                                                                                                                                                                                                                                                                                                                                                                                                                                                                  | -                                                                                                                                                                                                                                                                                                                                                                                                                                                                                                                                                                          |   |  |    |     |                |            |        |          |    |           |         |    |                    |   |   |                                                                         |                                                                                                                                                                                                                                                                                                                                                                                                                                                                                                                                                                                                                                                                                                                                                                                                                                                                                                                                                                                                                                           |      |                                  |     |                                                                                           |                                                                               |                                                                                                                                                                                                                                                                                                                                                                                                                                                                                                                                                                                                                                                                                                                                                                                                                                                                                                                                                                                                                                                                                                                                                                                                                                                                        |              |                                                                                                                                                                                                                                                                                                                                                                                                                                                                                                                                                                    |                                                                                                                                                                       |                                                                                                                                                      |      |                                                                                                                                                                                                                                                                                                                                                                                                                                                             |              |                                                                                             |                   |                       |           |                                                                                               |                                                                                                                                                                                                                                                                                                             |                                                 |           |   |                                                                                                                                                                     |                                                                                                                                                                                                                                                                                                                   |
| Ethnicity           | -                                                                                                                                                                                                                                                                                                                                                                                                                                                                                                                                                                                                                                                                  | -                                                                                                                                                                                                                                                                                                                                                                                                                                                                                                                                                                          |   |  |    |     |                |            |        |          |    |           |         |    |                    |   |   |                                                                         |                                                                                                                                                                                                                                                                                                                                                                                                                                                                                                                                                                                                                                                                                                                                                                                                                                                                                                                                                                                                                                           |      |                                  |     |                                                                                           |                                                                               |                                                                                                                                                                                                                                                                                                                                                                                                                                                                                                                                                                                                                                                                                                                                                                                                                                                                                                                                                                                                                                                                                                                                                                                                                                                                        |              |                                                                                                                                                                                                                                                                                                                                                                                                                                                                                                                                                                    |                                                                                                                                                                       |                                                                                                                                                      |      |                                                                                                                                                                                                                                                                                                                                                                                                                                                             |              |                                                                                             |                   |                       |           |                                                                                               |                                                                                                                                                                                                                                                                                                             |                                                 |           |   |                                                                                                                                                                     |                                                                                                                                                                                                                                                                                                                   |
| Living arrangement  | -                                                                                                                                                                                                                                                                                                                                                                                                                                                                                                                                                                                                                                                                  | -                                                                                                                                                                                                                                                                                                                                                                                                                                                                                                                                                                          |   |  |    |     |                |            |        |          |    |           |         |    |                    |   |   |                                                                         |                                                                                                                                                                                                                                                                                                                                                                                                                                                                                                                                                                                                                                                                                                                                                                                                                                                                                                                                                                                                                                           |      |                                  |     |                                                                                           |                                                                               |                                                                                                                                                                                                                                                                                                                                                                                                                                                                                                                                                                                                                                                                                                                                                                                                                                                                                                                                                                                                                                                                                                                                                                                                                                                                        |              |                                                                                                                                                                                                                                                                                                                                                                                                                                                                                                                                                                    |                                                                                                                                                                       |                                                                                                                                                      |      |                                                                                                                                                                                                                                                                                                                                                                                                                                                             |              |                                                                                             |                   |                       |           |                                                                                               |                                                                                                                                                                                                                                                                                                             |                                                 |           |   |                                                                                                                                                                     |                                                                                                                                                                                                                                                                                                                   |
| Employment status   | -                                                                                                                                                                                                                                                                                                                                                                                                                                                                                                                                                                                                                                                                  | -                                                                                                                                                                                                                                                                                                                                                                                                                                                                                                                                                                          |   |  |    |     |                |            |        |          |    |           |         |    |                    |   |   |                                                                         |                                                                                                                                                                                                                                                                                                                                                                                                                                                                                                                                                                                                                                                                                                                                                                                                                                                                                                                                                                                                                                           |      |                                  |     |                                                                                           |                                                                               |                                                                                                                                                                                                                                                                                                                                                                                                                                                                                                                                                                                                                                                                                                                                                                                                                                                                                                                                                                                                                                                                                                                                                                                                                                                                        |              |                                                                                                                                                                                                                                                                                                                                                                                                                                                                                                                                                                    |                                                                                                                                                                       |                                                                                                                                                      |      |                                                                                                                                                                                                                                                                                                                                                                                                                                                             |              |                                                                                             |                   |                       |           |                                                                                               |                                                                                                                                                                                                                                                                                                             |                                                 |           |   |                                                                                                                                                                     |                                                                                                                                                                                                                                                                                                                   |
| Other               | -                                                                                                                                                                                                                                                                                                                                                                                                                                                                                                                                                                                                                                                                  | -                                                                                                                                                                                                                                                                                                                                                                                                                                                                                                                                                                          |   |  |    |     |                |            |        |          |    |           |         |    |                    |   |   |                                                                         |                                                                                                                                                                                                                                                                                                                                                                                                                                                                                                                                                                                                                                                                                                                                                                                                                                                                                                                                                                                                                                           |      |                                  |     |                                                                                           |                                                                               |                                                                                                                                                                                                                                                                                                                                                                                                                                                                                                                                                                                                                                                                                                                                                                                                                                                                                                                                                                                                                                                                                                                                                                                                                                                                        |              |                                                                                                                                                                                                                                                                                                                                                                                                                                                                                                                                                                    |                                                                                                                                                                       |                                                                                                                                                      |      |                                                                                                                                                                                                                                                                                                                                                                                                                                                             |              |                                                                                             |                   |                       |           |                                                                                               |                                                                                                                                                                                                                                                                                                             |                                                 |           |   |                                                                                                                                                                     |                                                                                                                                                                                                                                                                                                                   |
| What                | Creating a formal way for GPs to refer patients with social, emotional or practical needs to a variety of holistic, local, non-clinical services. Social prescribing clinics receive patients with nonmedical issues, such as social isolation, from GPs who feel the patient could benefit from accessing interventions within the voluntary sector, they are discussing their issues in detail with volunteer social prescribers, then referred to local voluntary sector services which can provide the necessary interventions to resolve the patient's issues                                                                                                 |                                                                                                                                                                                                                                                                                                                                                                                                                                                                                                                                                                            |   |  |    |     |                |            |        |          |    |           |         |    |                    |   |   |                                                                         |                                                                                                                                                                                                                                                                                                                                                                                                                                                                                                                                                                                                                                                                                                                                                                                                                                                                                                                                                                                                                                           |      |                                  |     |                                                                                           |                                                                               |                                                                                                                                                                                                                                                                                                                                                                                                                                                                                                                                                                                                                                                                                                                                                                                                                                                                                                                                                                                                                                                                                                                                                                                                                                                                        |              |                                                                                                                                                                                                                                                                                                                                                                                                                                                                                                                                                                    |                                                                                                                                                                       |                                                                                                                                                      |      |                                                                                                                                                                                                                                                                                                                                                                                                                                                             |              |                                                                                             |                   |                       |           |                                                                                               |                                                                                                                                                                                                                                                                                                             |                                                 |           |   |                                                                                                                                                                     |                                                                                                                                                                                                                                                                                                                   |
| Who provided        | Volunteers from the Patient Participation Group (PPG)                                                                                                                                                                                                                                                                                                                                                                                                                                                                                                                                                                                                              |                                                                                                                                                                                                                                                                                                                                                                                                                                                                                                                                                                            |   |  |    |     |                |            |        |          |    |           |         |    |                    |   |   |                                                                         |                                                                                                                                                                                                                                                                                                                                                                                                                                                                                                                                                                                                                                                                                                                                                                                                                                                                                                                                                                                                                                           |      |                                  |     |                                                                                           |                                                                               |                                                                                                                                                                                                                                                                                                                                                                                                                                                                                                                                                                                                                                                                                                                                                                                                                                                                                                                                                                                                                                                                                                                                                                                                                                                                        |              |                                                                                                                                                                                                                                                                                                                                                                                                                                                                                                                                                                    |                                                                                                                                                                       |                                                                                                                                                      |      |                                                                                                                                                                                                                                                                                                                                                                                                                                                             |              |                                                                                             |                   |                       |           |                                                                                               |                                                                                                                                                                                                                                                                                                             |                                                 |           |   |                                                                                                                                                                     |                                                                                                                                                                                                                                                                                                                   |
| How                 | Face-to-face                                                                                                                                                                                                                                                                                                                                                                                                                                                                                                                                                                                                                                                       |                                                                                                                                                                                                                                                                                                                                                                                                                                                                                                                                                                            |   |  |    |     |                |            |        |          |    |           |         |    |                    |   |   |                                                                         |                                                                                                                                                                                                                                                                                                                                                                                                                                                                                                                                                                                                                                                                                                                                                                                                                                                                                                                                                                                                                                           |      |                                  |     |                                                                                           |                                                                               |                                                                                                                                                                                                                                                                                                                                                                                                                                                                                                                                                                                                                                                                                                                                                                                                                                                                                                                                                                                                                                                                                                                                                                                                                                                                        |              |                                                                                                                                                                                                                                                                                                                                                                                                                                                                                                                                                                    |                                                                                                                                                                       |                                                                                                                                                      |      |                                                                                                                                                                                                                                                                                                                                                                                                                                                             |              |                                                                                             |                   |                       |           |                                                                                               |                                                                                                                                                                                                                                                                                                             |                                                 |           |   |                                                                                                                                                                     |                                                                                                                                                                                                                                                                                                                   |
| Where               | Within the GP practice                                                                                                                                                                                                                                                                                                                                                                                                                                                                                                                                                                                                                                             |                                                                                                                                                                                                                                                                                                                                                                                                                                                                                                                                                                            |   |  |    |     |                |            |        |          |    |           |         |    |                    |   |   |                                                                         |                                                                                                                                                                                                                                                                                                                                                                                                                                                                                                                                                                                                                                                                                                                                                                                                                                                                                                                                                                                                                                           |      |                                  |     |                                                                                           |                                                                               |                                                                                                                                                                                                                                                                                                                                                                                                                                                                                                                                                                                                                                                                                                                                                                                                                                                                                                                                                                                                                                                                                                                                                                                                                                                                        |              |                                                                                                                                                                                                                                                                                                                                                                                                                                                                                                                                                                    |                                                                                                                                                                       |                                                                                                                                                      |      |                                                                                                                                                                                                                                                                                                                                                                                                                                                             |              |                                                                                             |                   |                       |           |                                                                                               |                                                                                                                                                                                                                                                                                                             |                                                 |           |   |                                                                                                                                                                     |                                                                                                                                                                                                                                                                                                                   |
| When and How Much   | 30-minute appointment                                                                                                                                                                                                                                                                                                                                                                                                                                                                                                                                                                                                                                              |                                                                                                                                                                                                                                                                                                                                                                                                                                                                                                                                                                            |   |  |    |     |                |            |        |          |    |           |         |    |                    |   |   |                                                                         |                                                                                                                                                                                                                                                                                                                                                                                                                                                                                                                                                                                                                                                                                                                                                                                                                                                                                                                                                                                                                                           |      |                                  |     |                                                                                           |                                                                               |                                                                                                                                                                                                                                                                                                                                                                                                                                                                                                                                                                                                                                                                                                                                                                                                                                                                                                                                                                                                                                                                                                                                                                                                                                                                        |              |                                                                                                                                                                                                                                                                                                                                                                                                                                                                                                                                                                    |                                                                                                                                                                       |                                                                                                                                                      |      |                                                                                                                                                                                                                                                                                                                                                                                                                                                             |              |                                                                                             |                   |                       |           |                                                                                               |                                                                                                                                                                                                                                                                                                             |                                                 |           |   |                                                                                                                                                                     |                                                                                                                                                                                                                                                                                                                   |
| Tailoring           | Personalized                                                                                                                                                                                                                                                                                                                                                                                                                                                                                                                                                                                                                                                       |                                                                                                                                                                                                                                                                                                                                                                                                                                                                                                                                                                            |   |  |    |     |                |            |        |          |    |           |         |    |                    |   |   |                                                                         |                                                                                                                                                                                                                                                                                                                                                                                                                                                                                                                                                                                                                                                                                                                                                                                                                                                                                                                                                                                                                                           |      |                                  |     |                                                                                           |                                                                               |                                                                                                                                                                                                                                                                                                                                                                                                                                                                                                                                                                                                                                                                                                                                                                                                                                                                                                                                                                                                                                                                                                                                                                                                                                                                        |              |                                                                                                                                                                                                                                                                                                                                                                                                                                                                                                                                                                    |                                                                                                                                                                       |                                                                                                                                                      |      |                                                                                                                                                                                                                                                                                                                                                                                                                                                             |              |                                                                                             |                   |                       |           |                                                                                               |                                                                                                                                                                                                                                                                                                             |                                                 |           |   |                                                                                                                                                                     |                                                                                                                                                                                                                                                                                                                   |
| Thomson 2020 (86)   | <p>Uncontrolled before-and-after study, mixed methods</p> <p>Study length:<br/>3 months</p>                                                                                                                                                                                                                                                                                                                                                                                                                                                                                                                                                                        | <p><b>Inclusion criteria:</b> -</p> <p><b>Exclusion criteria:</b> -</p> <p>Baseline characteristics:</p> <table border="1"> <tr> <td>N</td> <td></td> <td>20</td> </tr> <tr> <td>Age</td> <td>Mean (Range)</td> <td>53 (44-70)</td> </tr> <tr> <td>Gender</td> <td>Female %</td> <td>45</td> </tr> <tr> <td>Ethnicity</td> <td>White %</td> <td>60</td> </tr> <tr> <td>Living arrangement</td> <td>-</td> <td>-</td> </tr> <tr> <td>Employment status</td> <td>-</td> <td>-</td> </tr> <tr> <td>Other</td> <td>-</td> <td>-</td> </tr> </table> <p>Population: Unclear</p> | N |  | 20 | Age | Mean (Range)   | 53 (44-70) | Gender | Female % | 45 | Ethnicity | White % | 60 | Living arrangement | - | - | Employment status                                                       | -                                                                                                                                                                                                                                                                                                                                                                                                                                                                                                                                                                                                                                                                                                                                                                                                                                                                                                                                                                                                                                         | -    | Other                            | -   | -                                                                                         | <p>Secondary Care</p> <p>Country:<br/>UK (Manchester, North West England)</p> | <table border="1"> <tr> <td>Name</td> <td>GROW: Art, Park &amp; Wellbeing</td> </tr> <tr> <td>Why</td> <td>It was hypothesised for the quantitative phase of the study that measures of wellbeing would increase significantly reflecting positive improvements</td> </tr> <tr> <td>What</td> <td>They were recruited on the basis of accessing local mental health or social services through a community mental health nurse or day centre providing support to vulnerable and disadvantaged adults. Group project of dual engagement in green activity outdoors (including planting and clearing) and creative, arts-based activities indoors responding to collections with broad links to nature themes (including painting, print making and ceramics).</td> </tr> <tr> <td>Who provided</td> <td>Community partners, mental health nurse, day centre for disadvantaged and vulnerable adults</td> </tr> <tr> <td>How</td> <td>Face-to-face</td> </tr> <tr> <td>Where</td> <td>Whitworth Park and used the museum spaces to connect the indoors with the outdoors and nature</td> </tr> <tr> <td>When and How Much</td> <td>Every Tuesday for 10 weeks for 2-h sessions</td> </tr> <tr> <td>Tailoring</td> <td>-</td> </tr> </table> <p>Intervention: Medium</p> | Name         | GROW: Art, Park & Wellbeing                                                                                                                                                                                                                                                                                                                                                                                                                                                                                                                                        | Why                                                                                                                                                                   | It was hypothesised for the quantitative phase of the study that measures of wellbeing would increase significantly reflecting positive improvements | What | They were recruited on the basis of accessing local mental health or social services through a community mental health nurse or day centre providing support to vulnerable and disadvantaged adults. Group project of dual engagement in green activity outdoors (including planting and clearing) and creative, arts-based activities indoors responding to collections with broad links to nature themes (including painting, print making and ceramics). | Who provided | Community partners, mental health nurse, day centre for disadvantaged and vulnerable adults | How               | Face-to-face          | Where     | Whitworth Park and used the museum spaces to connect the indoors with the outdoors and nature | When and How Much                                                                                                                                                                                                                                                                                           | Every Tuesday for 10 weeks for 2-h sessions     | Tailoring | - | <p>Patient outcome at Baseline and 10-week endpoint:</p> <ul style="list-style-type: none"> <li>- UCL Museum Wellbeing Measure (6 individual mood items)</li> </ul> | <p>Peer-Review:<br/>Yes</p> <p>Funding source:<br/>Not So Grim Up North project funded by Arts Council England (2015–2018; Grant: 29250851). The GROW Project and the Whitworth Gallery's creation of the Art Garden has been funded by Jo Malone, London.</p> <p>Declarations of interest:<br/>None declared</p> |
| N                   |                                                                                                                                                                                                                                                                                                                                                                                                                                                                                                                                                                                                                                                                    | 20                                                                                                                                                                                                                                                                                                                                                                                                                                                                                                                                                                         |   |  |    |     |                |            |        |          |    |           |         |    |                    |   |   |                                                                         |                                                                                                                                                                                                                                                                                                                                                                                                                                                                                                                                                                                                                                                                                                                                                                                                                                                                                                                                                                                                                                           |      |                                  |     |                                                                                           |                                                                               |                                                                                                                                                                                                                                                                                                                                                                                                                                                                                                                                                                                                                                                                                                                                                                                                                                                                                                                                                                                                                                                                                                                                                                                                                                                                        |              |                                                                                                                                                                                                                                                                                                                                                                                                                                                                                                                                                                    |                                                                                                                                                                       |                                                                                                                                                      |      |                                                                                                                                                                                                                                                                                                                                                                                                                                                             |              |                                                                                             |                   |                       |           |                                                                                               |                                                                                                                                                                                                                                                                                                             |                                                 |           |   |                                                                                                                                                                     |                                                                                                                                                                                                                                                                                                                   |
| Age                 | Mean (Range)                                                                                                                                                                                                                                                                                                                                                                                                                                                                                                                                                                                                                                                       | 53 (44-70)                                                                                                                                                                                                                                                                                                                                                                                                                                                                                                                                                                 |   |  |    |     |                |            |        |          |    |           |         |    |                    |   |   |                                                                         |                                                                                                                                                                                                                                                                                                                                                                                                                                                                                                                                                                                                                                                                                                                                                                                                                                                                                                                                                                                                                                           |      |                                  |     |                                                                                           |                                                                               |                                                                                                                                                                                                                                                                                                                                                                                                                                                                                                                                                                                                                                                                                                                                                                                                                                                                                                                                                                                                                                                                                                                                                                                                                                                                        |              |                                                                                                                                                                                                                                                                                                                                                                                                                                                                                                                                                                    |                                                                                                                                                                       |                                                                                                                                                      |      |                                                                                                                                                                                                                                                                                                                                                                                                                                                             |              |                                                                                             |                   |                       |           |                                                                                               |                                                                                                                                                                                                                                                                                                             |                                                 |           |   |                                                                                                                                                                     |                                                                                                                                                                                                                                                                                                                   |
| Gender              | Female %                                                                                                                                                                                                                                                                                                                                                                                                                                                                                                                                                                                                                                                           | 45                                                                                                                                                                                                                                                                                                                                                                                                                                                                                                                                                                         |   |  |    |     |                |            |        |          |    |           |         |    |                    |   |   |                                                                         |                                                                                                                                                                                                                                                                                                                                                                                                                                                                                                                                                                                                                                                                                                                                                                                                                                                                                                                                                                                                                                           |      |                                  |     |                                                                                           |                                                                               |                                                                                                                                                                                                                                                                                                                                                                                                                                                                                                                                                                                                                                                                                                                                                                                                                                                                                                                                                                                                                                                                                                                                                                                                                                                                        |              |                                                                                                                                                                                                                                                                                                                                                                                                                                                                                                                                                                    |                                                                                                                                                                       |                                                                                                                                                      |      |                                                                                                                                                                                                                                                                                                                                                                                                                                                             |              |                                                                                             |                   |                       |           |                                                                                               |                                                                                                                                                                                                                                                                                                             |                                                 |           |   |                                                                                                                                                                     |                                                                                                                                                                                                                                                                                                                   |
| Ethnicity           | White %                                                                                                                                                                                                                                                                                                                                                                                                                                                                                                                                                                                                                                                            | 60                                                                                                                                                                                                                                                                                                                                                                                                                                                                                                                                                                         |   |  |    |     |                |            |        |          |    |           |         |    |                    |   |   |                                                                         |                                                                                                                                                                                                                                                                                                                                                                                                                                                                                                                                                                                                                                                                                                                                                                                                                                                                                                                                                                                                                                           |      |                                  |     |                                                                                           |                                                                               |                                                                                                                                                                                                                                                                                                                                                                                                                                                                                                                                                                                                                                                                                                                                                                                                                                                                                                                                                                                                                                                                                                                                                                                                                                                                        |              |                                                                                                                                                                                                                                                                                                                                                                                                                                                                                                                                                                    |                                                                                                                                                                       |                                                                                                                                                      |      |                                                                                                                                                                                                                                                                                                                                                                                                                                                             |              |                                                                                             |                   |                       |           |                                                                                               |                                                                                                                                                                                                                                                                                                             |                                                 |           |   |                                                                                                                                                                     |                                                                                                                                                                                                                                                                                                                   |
| Living arrangement  | -                                                                                                                                                                                                                                                                                                                                                                                                                                                                                                                                                                                                                                                                  | -                                                                                                                                                                                                                                                                                                                                                                                                                                                                                                                                                                          |   |  |    |     |                |            |        |          |    |           |         |    |                    |   |   |                                                                         |                                                                                                                                                                                                                                                                                                                                                                                                                                                                                                                                                                                                                                                                                                                                                                                                                                                                                                                                                                                                                                           |      |                                  |     |                                                                                           |                                                                               |                                                                                                                                                                                                                                                                                                                                                                                                                                                                                                                                                                                                                                                                                                                                                                                                                                                                                                                                                                                                                                                                                                                                                                                                                                                                        |              |                                                                                                                                                                                                                                                                                                                                                                                                                                                                                                                                                                    |                                                                                                                                                                       |                                                                                                                                                      |      |                                                                                                                                                                                                                                                                                                                                                                                                                                                             |              |                                                                                             |                   |                       |           |                                                                                               |                                                                                                                                                                                                                                                                                                             |                                                 |           |   |                                                                                                                                                                     |                                                                                                                                                                                                                                                                                                                   |
| Employment status   | -                                                                                                                                                                                                                                                                                                                                                                                                                                                                                                                                                                                                                                                                  | -                                                                                                                                                                                                                                                                                                                                                                                                                                                                                                                                                                          |   |  |    |     |                |            |        |          |    |           |         |    |                    |   |   |                                                                         |                                                                                                                                                                                                                                                                                                                                                                                                                                                                                                                                                                                                                                                                                                                                                                                                                                                                                                                                                                                                                                           |      |                                  |     |                                                                                           |                                                                               |                                                                                                                                                                                                                                                                                                                                                                                                                                                                                                                                                                                                                                                                                                                                                                                                                                                                                                                                                                                                                                                                                                                                                                                                                                                                        |              |                                                                                                                                                                                                                                                                                                                                                                                                                                                                                                                                                                    |                                                                                                                                                                       |                                                                                                                                                      |      |                                                                                                                                                                                                                                                                                                                                                                                                                                                             |              |                                                                                             |                   |                       |           |                                                                                               |                                                                                                                                                                                                                                                                                                             |                                                 |           |   |                                                                                                                                                                     |                                                                                                                                                                                                                                                                                                                   |
| Other               | -                                                                                                                                                                                                                                                                                                                                                                                                                                                                                                                                                                                                                                                                  | -                                                                                                                                                                                                                                                                                                                                                                                                                                                                                                                                                                          |   |  |    |     |                |            |        |          |    |           |         |    |                    |   |   |                                                                         |                                                                                                                                                                                                                                                                                                                                                                                                                                                                                                                                                                                                                                                                                                                                                                                                                                                                                                                                                                                                                                           |      |                                  |     |                                                                                           |                                                                               |                                                                                                                                                                                                                                                                                                                                                                                                                                                                                                                                                                                                                                                                                                                                                                                                                                                                                                                                                                                                                                                                                                                                                                                                                                                                        |              |                                                                                                                                                                                                                                                                                                                                                                                                                                                                                                                                                                    |                                                                                                                                                                       |                                                                                                                                                      |      |                                                                                                                                                                                                                                                                                                                                                                                                                                                             |              |                                                                                             |                   |                       |           |                                                                                               |                                                                                                                                                                                                                                                                                                             |                                                 |           |   |                                                                                                                                                                     |                                                                                                                                                                                                                                                                                                                   |
| Name                | GROW: Art, Park & Wellbeing                                                                                                                                                                                                                                                                                                                                                                                                                                                                                                                                                                                                                                        |                                                                                                                                                                                                                                                                                                                                                                                                                                                                                                                                                                            |   |  |    |     |                |            |        |          |    |           |         |    |                    |   |   |                                                                         |                                                                                                                                                                                                                                                                                                                                                                                                                                                                                                                                                                                                                                                                                                                                                                                                                                                                                                                                                                                                                                           |      |                                  |     |                                                                                           |                                                                               |                                                                                                                                                                                                                                                                                                                                                                                                                                                                                                                                                                                                                                                                                                                                                                                                                                                                                                                                                                                                                                                                                                                                                                                                                                                                        |              |                                                                                                                                                                                                                                                                                                                                                                                                                                                                                                                                                                    |                                                                                                                                                                       |                                                                                                                                                      |      |                                                                                                                                                                                                                                                                                                                                                                                                                                                             |              |                                                                                             |                   |                       |           |                                                                                               |                                                                                                                                                                                                                                                                                                             |                                                 |           |   |                                                                                                                                                                     |                                                                                                                                                                                                                                                                                                                   |
| Why                 | It was hypothesised for the quantitative phase of the study that measures of wellbeing would increase significantly reflecting positive improvements                                                                                                                                                                                                                                                                                                                                                                                                                                                                                                               |                                                                                                                                                                                                                                                                                                                                                                                                                                                                                                                                                                            |   |  |    |     |                |            |        |          |    |           |         |    |                    |   |   |                                                                         |                                                                                                                                                                                                                                                                                                                                                                                                                                                                                                                                                                                                                                                                                                                                                                                                                                                                                                                                                                                                                                           |      |                                  |     |                                                                                           |                                                                               |                                                                                                                                                                                                                                                                                                                                                                                                                                                                                                                                                                                                                                                                                                                                                                                                                                                                                                                                                                                                                                                                                                                                                                                                                                                                        |              |                                                                                                                                                                                                                                                                                                                                                                                                                                                                                                                                                                    |                                                                                                                                                                       |                                                                                                                                                      |      |                                                                                                                                                                                                                                                                                                                                                                                                                                                             |              |                                                                                             |                   |                       |           |                                                                                               |                                                                                                                                                                                                                                                                                                             |                                                 |           |   |                                                                                                                                                                     |                                                                                                                                                                                                                                                                                                                   |
| What                | They were recruited on the basis of accessing local mental health or social services through a community mental health nurse or day centre providing support to vulnerable and disadvantaged adults. Group project of dual engagement in green activity outdoors (including planting and clearing) and creative, arts-based activities indoors responding to collections with broad links to nature themes (including painting, print making and ceramics).                                                                                                                                                                                                        |                                                                                                                                                                                                                                                                                                                                                                                                                                                                                                                                                                            |   |  |    |     |                |            |        |          |    |           |         |    |                    |   |   |                                                                         |                                                                                                                                                                                                                                                                                                                                                                                                                                                                                                                                                                                                                                                                                                                                                                                                                                                                                                                                                                                                                                           |      |                                  |     |                                                                                           |                                                                               |                                                                                                                                                                                                                                                                                                                                                                                                                                                                                                                                                                                                                                                                                                                                                                                                                                                                                                                                                                                                                                                                                                                                                                                                                                                                        |              |                                                                                                                                                                                                                                                                                                                                                                                                                                                                                                                                                                    |                                                                                                                                                                       |                                                                                                                                                      |      |                                                                                                                                                                                                                                                                                                                                                                                                                                                             |              |                                                                                             |                   |                       |           |                                                                                               |                                                                                                                                                                                                                                                                                                             |                                                 |           |   |                                                                                                                                                                     |                                                                                                                                                                                                                                                                                                                   |
| Who provided        | Community partners, mental health nurse, day centre for disadvantaged and vulnerable adults                                                                                                                                                                                                                                                                                                                                                                                                                                                                                                                                                                        |                                                                                                                                                                                                                                                                                                                                                                                                                                                                                                                                                                            |   |  |    |     |                |            |        |          |    |           |         |    |                    |   |   |                                                                         |                                                                                                                                                                                                                                                                                                                                                                                                                                                                                                                                                                                                                                                                                                                                                                                                                                                                                                                                                                                                                                           |      |                                  |     |                                                                                           |                                                                               |                                                                                                                                                                                                                                                                                                                                                                                                                                                                                                                                                                                                                                                                                                                                                                                                                                                                                                                                                                                                                                                                                                                                                                                                                                                                        |              |                                                                                                                                                                                                                                                                                                                                                                                                                                                                                                                                                                    |                                                                                                                                                                       |                                                                                                                                                      |      |                                                                                                                                                                                                                                                                                                                                                                                                                                                             |              |                                                                                             |                   |                       |           |                                                                                               |                                                                                                                                                                                                                                                                                                             |                                                 |           |   |                                                                                                                                                                     |                                                                                                                                                                                                                                                                                                                   |
| How                 | Face-to-face                                                                                                                                                                                                                                                                                                                                                                                                                                                                                                                                                                                                                                                       |                                                                                                                                                                                                                                                                                                                                                                                                                                                                                                                                                                            |   |  |    |     |                |            |        |          |    |           |         |    |                    |   |   |                                                                         |                                                                                                                                                                                                                                                                                                                                                                                                                                                                                                                                                                                                                                                                                                                                                                                                                                                                                                                                                                                                                                           |      |                                  |     |                                                                                           |                                                                               |                                                                                                                                                                                                                                                                                                                                                                                                                                                                                                                                                                                                                                                                                                                                                                                                                                                                                                                                                                                                                                                                                                                                                                                                                                                                        |              |                                                                                                                                                                                                                                                                                                                                                                                                                                                                                                                                                                    |                                                                                                                                                                       |                                                                                                                                                      |      |                                                                                                                                                                                                                                                                                                                                                                                                                                                             |              |                                                                                             |                   |                       |           |                                                                                               |                                                                                                                                                                                                                                                                                                             |                                                 |           |   |                                                                                                                                                                     |                                                                                                                                                                                                                                                                                                                   |
| Where               | Whitworth Park and used the museum spaces to connect the indoors with the outdoors and nature                                                                                                                                                                                                                                                                                                                                                                                                                                                                                                                                                                      |                                                                                                                                                                                                                                                                                                                                                                                                                                                                                                                                                                            |   |  |    |     |                |            |        |          |    |           |         |    |                    |   |   |                                                                         |                                                                                                                                                                                                                                                                                                                                                                                                                                                                                                                                                                                                                                                                                                                                                                                                                                                                                                                                                                                                                                           |      |                                  |     |                                                                                           |                                                                               |                                                                                                                                                                                                                                                                                                                                                                                                                                                                                                                                                                                                                                                                                                                                                                                                                                                                                                                                                                                                                                                                                                                                                                                                                                                                        |              |                                                                                                                                                                                                                                                                                                                                                                                                                                                                                                                                                                    |                                                                                                                                                                       |                                                                                                                                                      |      |                                                                                                                                                                                                                                                                                                                                                                                                                                                             |              |                                                                                             |                   |                       |           |                                                                                               |                                                                                                                                                                                                                                                                                                             |                                                 |           |   |                                                                                                                                                                     |                                                                                                                                                                                                                                                                                                                   |
| When and How Much   | Every Tuesday for 10 weeks for 2-h sessions                                                                                                                                                                                                                                                                                                                                                                                                                                                                                                                                                                                                                        |                                                                                                                                                                                                                                                                                                                                                                                                                                                                                                                                                                            |   |  |    |     |                |            |        |          |    |           |         |    |                    |   |   |                                                                         |                                                                                                                                                                                                                                                                                                                                                                                                                                                                                                                                                                                                                                                                                                                                                                                                                                                                                                                                                                                                                                           |      |                                  |     |                                                                                           |                                                                               |                                                                                                                                                                                                                                                                                                                                                                                                                                                                                                                                                                                                                                                                                                                                                                                                                                                                                                                                                                                                                                                                                                                                                                                                                                                                        |              |                                                                                                                                                                                                                                                                                                                                                                                                                                                                                                                                                                    |                                                                                                                                                                       |                                                                                                                                                      |      |                                                                                                                                                                                                                                                                                                                                                                                                                                                             |              |                                                                                             |                   |                       |           |                                                                                               |                                                                                                                                                                                                                                                                                                             |                                                 |           |   |                                                                                                                                                                     |                                                                                                                                                                                                                                                                                                                   |
| Tailoring           | -                                                                                                                                                                                                                                                                                                                                                                                                                                                                                                                                                                                                                                                                  |                                                                                                                                                                                                                                                                                                                                                                                                                                                                                                                                                                            |   |  |    |     |                |            |        |          |    |           |         |    |                    |   |   |                                                                         |                                                                                                                                                                                                                                                                                                                                                                                                                                                                                                                                                                                                                                                                                                                                                                                                                                                                                                                                                                                                                                           |      |                                  |     |                                                                                           |                                                                               |                                                                                                                                                                                                                                                                                                                                                                                                                                                                                                                                                                                                                                                                                                                                                                                                                                                                                                                                                                                                                                                                                                                                                                                                                                                                        |              |                                                                                                                                                                                                                                                                                                                                                                                                                                                                                                                                                                    |                                                                                                                                                                       |                                                                                                                                                      |      |                                                                                                                                                                                                                                                                                                                                                                                                                                                             |              |                                                                                             |                   |                       |           |                                                                                               |                                                                                                                                                                                                                                                                                                             |                                                 |           |   |                                                                                                                                                                     |                                                                                                                                                                                                                                                                                                                   |
| Vogelpoel 2014 (87) | <p>Uncontrolled before-and-after study, mixed methods</p> <p>Study length:<br/>-</p>                                                                                                                                                                                                                                                                                                                                                                                                                                                                                                                                                                               | <p><b>Inclusion criteria:</b></p> <p>Older people experiencing social isolation and associated health problems who have single or multi-sensory impairment</p> <p><b>Exclusion criteria:</b> -</p> <p>Baseline characteristics:</p> <table border="1"> <tr> <td>N</td> <td></td> <td>12</td> </tr> <tr> <td>Age</td> <td>Mean (Range)</td> <td>80 (61-95)</td> </tr> <tr> <td>Gender</td> <td>Female %</td> <td>75</td> </tr> <tr> <td>Ethnicity</td> <td>-</td> <td>-</td> </tr> <tr> <td>Living arrangement</td> <td>-</td> <td>-</td> </tr> </table>                    | N |  | 12 | Age | Mean (Range)   | 80 (61-95) | Gender | Female % | 75 | Ethnicity | -       | -  | Living arrangement | - | - | <p>Primary Care</p> <p>Country:<br/>UK (Rotherham, South Yorkshire)</p> | <table border="1"> <tr> <td>Name</td> <td>Social prescription arts program</td> </tr> <tr> <td>Why</td> <td>Social isolation is a significant issue for people who are both old and sensory impaired.</td> </tr> <tr> <td>What</td> <td>Three-stage referral process linking local GPs with the agency.<br/><br/>Participants were invited to the first session, and regular contact was maintained throughout; with reminders for transport arrangements and upcoming developments signposted to participants throughout the process. This aspect became an important part of the engagement and implementation phase, because it enabled participants to implement important choice-making and autonomy building processes. Disability and sensory adapted accessibility was ensured. Sense support staff and communicator guides assisted a visual and tactile arts facilitator, throughout the sessions.</td> </tr> <tr> <td>Who provided</td> <td>Referral officers, Sense support staff and communicator guides</td> </tr> </table> | Name | Social prescription arts program | Why | Social isolation is a significant issue for people who are both old and sensory impaired. | What                                                                          | Three-stage referral process linking local GPs with the agency.<br><br>Participants were invited to the first session, and regular contact was maintained throughout; with reminders for transport arrangements and upcoming developments signposted to participants throughout the process. This aspect became an important part of the engagement and implementation phase, because it enabled participants to implement important choice-making and autonomy building processes. Disability and sensory adapted accessibility was ensured. Sense support staff and communicator guides assisted a visual and tactile arts facilitator, throughout the sessions.                                                                                                                                                                                                                                                                                                                                                                                                                                                                                                                                                                                                     | Who provided | Referral officers, Sense support staff and communicator guides                                                                                                                                                                                                                                                                                                                                                                                                                                                                                                     | <p>Patient outcome self-reported at Baseline and 12 weeks follow-up:</p> <ul style="list-style-type: none"> <li>- Warwick Edinburgh Mental Wellbeing Scale</li> </ul> | <p>Peer-Review:<br/>Yes</p> <p>Funding source:<br/>Voluntary Action Rotherham</p> <p>Declarations of interest:<br/>Unknown</p>                       |      |                                                                                                                                                                                                                                                                                                                                                                                                                                                             |              |                                                                                             |                   |                       |           |                                                                                               |                                                                                                                                                                                                                                                                                                             |                                                 |           |   |                                                                                                                                                                     |                                                                                                                                                                                                                                                                                                                   |
| N                   |                                                                                                                                                                                                                                                                                                                                                                                                                                                                                                                                                                                                                                                                    | 12                                                                                                                                                                                                                                                                                                                                                                                                                                                                                                                                                                         |   |  |    |     |                |            |        |          |    |           |         |    |                    |   |   |                                                                         |                                                                                                                                                                                                                                                                                                                                                                                                                                                                                                                                                                                                                                                                                                                                                                                                                                                                                                                                                                                                                                           |      |                                  |     |                                                                                           |                                                                               |                                                                                                                                                                                                                                                                                                                                                                                                                                                                                                                                                                                                                                                                                                                                                                                                                                                                                                                                                                                                                                                                                                                                                                                                                                                                        |              |                                                                                                                                                                                                                                                                                                                                                                                                                                                                                                                                                                    |                                                                                                                                                                       |                                                                                                                                                      |      |                                                                                                                                                                                                                                                                                                                                                                                                                                                             |              |                                                                                             |                   |                       |           |                                                                                               |                                                                                                                                                                                                                                                                                                             |                                                 |           |   |                                                                                                                                                                     |                                                                                                                                                                                                                                                                                                                   |
| Age                 | Mean (Range)                                                                                                                                                                                                                                                                                                                                                                                                                                                                                                                                                                                                                                                       | 80 (61-95)                                                                                                                                                                                                                                                                                                                                                                                                                                                                                                                                                                 |   |  |    |     |                |            |        |          |    |           |         |    |                    |   |   |                                                                         |                                                                                                                                                                                                                                                                                                                                                                                                                                                                                                                                                                                                                                                                                                                                                                                                                                                                                                                                                                                                                                           |      |                                  |     |                                                                                           |                                                                               |                                                                                                                                                                                                                                                                                                                                                                                                                                                                                                                                                                                                                                                                                                                                                                                                                                                                                                                                                                                                                                                                                                                                                                                                                                                                        |              |                                                                                                                                                                                                                                                                                                                                                                                                                                                                                                                                                                    |                                                                                                                                                                       |                                                                                                                                                      |      |                                                                                                                                                                                                                                                                                                                                                                                                                                                             |              |                                                                                             |                   |                       |           |                                                                                               |                                                                                                                                                                                                                                                                                                             |                                                 |           |   |                                                                                                                                                                     |                                                                                                                                                                                                                                                                                                                   |
| Gender              | Female %                                                                                                                                                                                                                                                                                                                                                                                                                                                                                                                                                                                                                                                           | 75                                                                                                                                                                                                                                                                                                                                                                                                                                                                                                                                                                         |   |  |    |     |                |            |        |          |    |           |         |    |                    |   |   |                                                                         |                                                                                                                                                                                                                                                                                                                                                                                                                                                                                                                                                                                                                                                                                                                                                                                                                                                                                                                                                                                                                                           |      |                                  |     |                                                                                           |                                                                               |                                                                                                                                                                                                                                                                                                                                                                                                                                                                                                                                                                                                                                                                                                                                                                                                                                                                                                                                                                                                                                                                                                                                                                                                                                                                        |              |                                                                                                                                                                                                                                                                                                                                                                                                                                                                                                                                                                    |                                                                                                                                                                       |                                                                                                                                                      |      |                                                                                                                                                                                                                                                                                                                                                                                                                                                             |              |                                                                                             |                   |                       |           |                                                                                               |                                                                                                                                                                                                                                                                                                             |                                                 |           |   |                                                                                                                                                                     |                                                                                                                                                                                                                                                                                                                   |
| Ethnicity           | -                                                                                                                                                                                                                                                                                                                                                                                                                                                                                                                                                                                                                                                                  | -                                                                                                                                                                                                                                                                                                                                                                                                                                                                                                                                                                          |   |  |    |     |                |            |        |          |    |           |         |    |                    |   |   |                                                                         |                                                                                                                                                                                                                                                                                                                                                                                                                                                                                                                                                                                                                                                                                                                                                                                                                                                                                                                                                                                                                                           |      |                                  |     |                                                                                           |                                                                               |                                                                                                                                                                                                                                                                                                                                                                                                                                                                                                                                                                                                                                                                                                                                                                                                                                                                                                                                                                                                                                                                                                                                                                                                                                                                        |              |                                                                                                                                                                                                                                                                                                                                                                                                                                                                                                                                                                    |                                                                                                                                                                       |                                                                                                                                                      |      |                                                                                                                                                                                                                                                                                                                                                                                                                                                             |              |                                                                                             |                   |                       |           |                                                                                               |                                                                                                                                                                                                                                                                                                             |                                                 |           |   |                                                                                                                                                                     |                                                                                                                                                                                                                                                                                                                   |
| Living arrangement  | -                                                                                                                                                                                                                                                                                                                                                                                                                                                                                                                                                                                                                                                                  | -                                                                                                                                                                                                                                                                                                                                                                                                                                                                                                                                                                          |   |  |    |     |                |            |        |          |    |           |         |    |                    |   |   |                                                                         |                                                                                                                                                                                                                                                                                                                                                                                                                                                                                                                                                                                                                                                                                                                                                                                                                                                                                                                                                                                                                                           |      |                                  |     |                                                                                           |                                                                               |                                                                                                                                                                                                                                                                                                                                                                                                                                                                                                                                                                                                                                                                                                                                                                                                                                                                                                                                                                                                                                                                                                                                                                                                                                                                        |              |                                                                                                                                                                                                                                                                                                                                                                                                                                                                                                                                                                    |                                                                                                                                                                       |                                                                                                                                                      |      |                                                                                                                                                                                                                                                                                                                                                                                                                                                             |              |                                                                                             |                   |                       |           |                                                                                               |                                                                                                                                                                                                                                                                                                             |                                                 |           |   |                                                                                                                                                                     |                                                                                                                                                                                                                                                                                                                   |
| Name                | Social prescription arts program                                                                                                                                                                                                                                                                                                                                                                                                                                                                                                                                                                                                                                   |                                                                                                                                                                                                                                                                                                                                                                                                                                                                                                                                                                            |   |  |    |     |                |            |        |          |    |           |         |    |                    |   |   |                                                                         |                                                                                                                                                                                                                                                                                                                                                                                                                                                                                                                                                                                                                                                                                                                                                                                                                                                                                                                                                                                                                                           |      |                                  |     |                                                                                           |                                                                               |                                                                                                                                                                                                                                                                                                                                                                                                                                                                                                                                                                                                                                                                                                                                                                                                                                                                                                                                                                                                                                                                                                                                                                                                                                                                        |              |                                                                                                                                                                                                                                                                                                                                                                                                                                                                                                                                                                    |                                                                                                                                                                       |                                                                                                                                                      |      |                                                                                                                                                                                                                                                                                                                                                                                                                                                             |              |                                                                                             |                   |                       |           |                                                                                               |                                                                                                                                                                                                                                                                                                             |                                                 |           |   |                                                                                                                                                                     |                                                                                                                                                                                                                                                                                                                   |
| Why                 | Social isolation is a significant issue for people who are both old and sensory impaired.                                                                                                                                                                                                                                                                                                                                                                                                                                                                                                                                                                          |                                                                                                                                                                                                                                                                                                                                                                                                                                                                                                                                                                            |   |  |    |     |                |            |        |          |    |           |         |    |                    |   |   |                                                                         |                                                                                                                                                                                                                                                                                                                                                                                                                                                                                                                                                                                                                                                                                                                                                                                                                                                                                                                                                                                                                                           |      |                                  |     |                                                                                           |                                                                               |                                                                                                                                                                                                                                                                                                                                                                                                                                                                                                                                                                                                                                                                                                                                                                                                                                                                                                                                                                                                                                                                                                                                                                                                                                                                        |              |                                                                                                                                                                                                                                                                                                                                                                                                                                                                                                                                                                    |                                                                                                                                                                       |                                                                                                                                                      |      |                                                                                                                                                                                                                                                                                                                                                                                                                                                             |              |                                                                                             |                   |                       |           |                                                                                               |                                                                                                                                                                                                                                                                                                             |                                                 |           |   |                                                                                                                                                                     |                                                                                                                                                                                                                                                                                                                   |
| What                | Three-stage referral process linking local GPs with the agency.<br><br>Participants were invited to the first session, and regular contact was maintained throughout; with reminders for transport arrangements and upcoming developments signposted to participants throughout the process. This aspect became an important part of the engagement and implementation phase, because it enabled participants to implement important choice-making and autonomy building processes. Disability and sensory adapted accessibility was ensured. Sense support staff and communicator guides assisted a visual and tactile arts facilitator, throughout the sessions. |                                                                                                                                                                                                                                                                                                                                                                                                                                                                                                                                                                            |   |  |    |     |                |            |        |          |    |           |         |    |                    |   |   |                                                                         |                                                                                                                                                                                                                                                                                                                                                                                                                                                                                                                                                                                                                                                                                                                                                                                                                                                                                                                                                                                                                                           |      |                                  |     |                                                                                           |                                                                               |                                                                                                                                                                                                                                                                                                                                                                                                                                                                                                                                                                                                                                                                                                                                                                                                                                                                                                                                                                                                                                                                                                                                                                                                                                                                        |              |                                                                                                                                                                                                                                                                                                                                                                                                                                                                                                                                                                    |                                                                                                                                                                       |                                                                                                                                                      |      |                                                                                                                                                                                                                                                                                                                                                                                                                                                             |              |                                                                                             |                   |                       |           |                                                                                               |                                                                                                                                                                                                                                                                                                             |                                                 |           |   |                                                                                                                                                                     |                                                                                                                                                                                                                                                                                                                   |
| Who provided        | Referral officers, Sense support staff and communicator guides                                                                                                                                                                                                                                                                                                                                                                                                                                                                                                                                                                                                     |                                                                                                                                                                                                                                                                                                                                                                                                                                                                                                                                                                            |   |  |    |     |                |            |        |          |    |           |         |    |                    |   |   |                                                                         |                                                                                                                                                                                                                                                                                                                                                                                                                                                                                                                                                                                                                                                                                                                                                                                                                                                                                                                                                                                                                                           |      |                                  |     |                                                                                           |                                                                               |                                                                                                                                                                                                                                                                                                                                                                                                                                                                                                                                                                                                                                                                                                                                                                                                                                                                                                                                                                                                                                                                                                                                                                                                                                                                        |              |                                                                                                                                                                                                                                                                                                                                                                                                                                                                                                                                                                    |                                                                                                                                                                       |                                                                                                                                                      |      |                                                                                                                                                                                                                                                                                                                                                                                                                                                             |              |                                                                                             |                   |                       |           |                                                                                               |                                                                                                                                                                                                                                                                                                             |                                                 |           |   |                                                                                                                                                                     |                                                                                                                                                                                                                                                                                                                   |

|                                     |                                                                                                                                                                                                                                                                                                                                                                                                                                                                                                                                                                                                                                                                                                                                                                                                                                                                                                                                                                                                                                                                                                                                                                                                                                                                                                                                                                                                                                                                                                      |                                                                                                                                                                                                                                                                                                                                                                                                                                                                                                                                                                                                                                                                                                                                                                                                                                                                                                                      |                   |   |      |                                                                              |                                                                                                                                                                                                                                                                                                                                                                                                                                |           |                   |                                                                                                                                                                                                                                                                                                                                                                                                  |                                                                                                                                                                                                                                  |              |                                            |                                                                                                                                                                                                                         |                                                                           |          |           |                   |              |      |  |                              |      |       |                                                  |      |                                        |                                                                                                                                                                                                                                                                                                                                                                                                                                                                                                                                                                                                                                                                                                                                                                                                                                                                                                                                                                                                                                                                                                                                                                                                                                                                                                                                                                                                                                                                                                                                                                                                                                                                                                                                                                                                                                                                                                                                                                                                                                                                                                                                                                                   |      |                                        |     |                                                                              |      |                                                                                                                                                                                                                                                                                                                                                                                                                                                                                                                                                                                                                                                                                                                                                                                                                                                                                                                                                                                                                                                                                                                                                                                                                                                                                                                                                                                                                                                                                                      |              |                  |     |              |       |                       |                   |                                                                                                                    |           |              |                                                                                                                                                                                                                                                                                                                                                                                                                                                                                                                                                                                                                                                                                                                                                                                         |                                                                                                             |
|-------------------------------------|------------------------------------------------------------------------------------------------------------------------------------------------------------------------------------------------------------------------------------------------------------------------------------------------------------------------------------------------------------------------------------------------------------------------------------------------------------------------------------------------------------------------------------------------------------------------------------------------------------------------------------------------------------------------------------------------------------------------------------------------------------------------------------------------------------------------------------------------------------------------------------------------------------------------------------------------------------------------------------------------------------------------------------------------------------------------------------------------------------------------------------------------------------------------------------------------------------------------------------------------------------------------------------------------------------------------------------------------------------------------------------------------------------------------------------------------------------------------------------------------------|----------------------------------------------------------------------------------------------------------------------------------------------------------------------------------------------------------------------------------------------------------------------------------------------------------------------------------------------------------------------------------------------------------------------------------------------------------------------------------------------------------------------------------------------------------------------------------------------------------------------------------------------------------------------------------------------------------------------------------------------------------------------------------------------------------------------------------------------------------------------------------------------------------------------|-------------------|---|------|------------------------------------------------------------------------------|--------------------------------------------------------------------------------------------------------------------------------------------------------------------------------------------------------------------------------------------------------------------------------------------------------------------------------------------------------------------------------------------------------------------------------|-----------|-------------------|--------------------------------------------------------------------------------------------------------------------------------------------------------------------------------------------------------------------------------------------------------------------------------------------------------------------------------------------------------------------------------------------------|----------------------------------------------------------------------------------------------------------------------------------------------------------------------------------------------------------------------------------|--------------|--------------------------------------------|-------------------------------------------------------------------------------------------------------------------------------------------------------------------------------------------------------------------------|---------------------------------------------------------------------------|----------|-----------|-------------------|--------------|------|--|------------------------------|------|-------|--------------------------------------------------|------|----------------------------------------|-----------------------------------------------------------------------------------------------------------------------------------------------------------------------------------------------------------------------------------------------------------------------------------------------------------------------------------------------------------------------------------------------------------------------------------------------------------------------------------------------------------------------------------------------------------------------------------------------------------------------------------------------------------------------------------------------------------------------------------------------------------------------------------------------------------------------------------------------------------------------------------------------------------------------------------------------------------------------------------------------------------------------------------------------------------------------------------------------------------------------------------------------------------------------------------------------------------------------------------------------------------------------------------------------------------------------------------------------------------------------------------------------------------------------------------------------------------------------------------------------------------------------------------------------------------------------------------------------------------------------------------------------------------------------------------------------------------------------------------------------------------------------------------------------------------------------------------------------------------------------------------------------------------------------------------------------------------------------------------------------------------------------------------------------------------------------------------------------------------------------------------------------------------------------------------|------|----------------------------------------|-----|------------------------------------------------------------------------------|------|------------------------------------------------------------------------------------------------------------------------------------------------------------------------------------------------------------------------------------------------------------------------------------------------------------------------------------------------------------------------------------------------------------------------------------------------------------------------------------------------------------------------------------------------------------------------------------------------------------------------------------------------------------------------------------------------------------------------------------------------------------------------------------------------------------------------------------------------------------------------------------------------------------------------------------------------------------------------------------------------------------------------------------------------------------------------------------------------------------------------------------------------------------------------------------------------------------------------------------------------------------------------------------------------------------------------------------------------------------------------------------------------------------------------------------------------------------------------------------------------------|--------------|------------------|-----|--------------|-------|-----------------------|-------------------|--------------------------------------------------------------------------------------------------------------------|-----------|--------------|-----------------------------------------------------------------------------------------------------------------------------------------------------------------------------------------------------------------------------------------------------------------------------------------------------------------------------------------------------------------------------------------------------------------------------------------------------------------------------------------------------------------------------------------------------------------------------------------------------------------------------------------------------------------------------------------------------------------------------------------------------------------------------------------|-------------------------------------------------------------------------------------------------------------|
|                                     |                                                                                                                                                                                                                                                                                                                                                                                                                                                                                                                                                                                                                                                                                                                                                                                                                                                                                                                                                                                                                                                                                                                                                                                                                                                                                                                                                                                                                                                                                                      | <table border="1"> <tr> <td>Employment status</td> <td>-</td> <td>-</td> </tr> <tr> <td>Other</td> <td>Vision impairment %</td> <td>58</td> </tr> </table> <p>Population: Special (Sensory Impairment)</p>                                                                                                                                                                                                                                                                                                                                                                                                                                                                                                                                                                                                                                                                                                           | Employment status | - | -    | Other                                                                        | Vision impairment %                                                                                                                                                                                                                                                                                                                                                                                                            | 58        |                   | <table border="1"> <tr> <td>How</td> <td>Face-to-face</td> </tr> <tr> <td>Where</td> <td>The practical workshop was delivered at a fully accessible resource centre in central Rotherham. Participants were provided travel support.</td> </tr> <tr> <td>When and How Much</td> <td>12 weeks</td> </tr> <tr> <td>Tailoring</td> <td>Personalized</td> </tr> </table> <p>Intervention: Medium</p> | How                                                                                                                                                                                                                              | Face-to-face | Where                                      | The practical workshop was delivered at a fully accessible resource centre in central Rotherham. Participants were provided travel support.                                                                             | When and How Much                                                         | 12 weeks | Tailoring | Personalized      |              |      |  |                              |      |       |                                                  |      |                                        |                                                                                                                                                                                                                                                                                                                                                                                                                                                                                                                                                                                                                                                                                                                                                                                                                                                                                                                                                                                                                                                                                                                                                                                                                                                                                                                                                                                                                                                                                                                                                                                                                                                                                                                                                                                                                                                                                                                                                                                                                                                                                                                                                                                   |      |                                        |     |                                                                              |      |                                                                                                                                                                                                                                                                                                                                                                                                                                                                                                                                                                                                                                                                                                                                                                                                                                                                                                                                                                                                                                                                                                                                                                                                                                                                                                                                                                                                                                                                                                      |              |                  |     |              |       |                       |                   |                                                                                                                    |           |              |                                                                                                                                                                                                                                                                                                                                                                                                                                                                                                                                                                                                                                                                                                                                                                                         |                                                                                                             |
| Employment status                   | -                                                                                                                                                                                                                                                                                                                                                                                                                                                                                                                                                                                                                                                                                                                                                                                                                                                                                                                                                                                                                                                                                                                                                                                                                                                                                                                                                                                                                                                                                                    | -                                                                                                                                                                                                                                                                                                                                                                                                                                                                                                                                                                                                                                                                                                                                                                                                                                                                                                                    |                   |   |      |                                                                              |                                                                                                                                                                                                                                                                                                                                                                                                                                |           |                   |                                                                                                                                                                                                                                                                                                                                                                                                  |                                                                                                                                                                                                                                  |              |                                            |                                                                                                                                                                                                                         |                                                                           |          |           |                   |              |      |  |                              |      |       |                                                  |      |                                        |                                                                                                                                                                                                                                                                                                                                                                                                                                                                                                                                                                                                                                                                                                                                                                                                                                                                                                                                                                                                                                                                                                                                                                                                                                                                                                                                                                                                                                                                                                                                                                                                                                                                                                                                                                                                                                                                                                                                                                                                                                                                                                                                                                                   |      |                                        |     |                                                                              |      |                                                                                                                                                                                                                                                                                                                                                                                                                                                                                                                                                                                                                                                                                                                                                                                                                                                                                                                                                                                                                                                                                                                                                                                                                                                                                                                                                                                                                                                                                                      |              |                  |     |              |       |                       |                   |                                                                                                                    |           |              |                                                                                                                                                                                                                                                                                                                                                                                                                                                                                                                                                                                                                                                                                                                                                                                         |                                                                                                             |
| Other                               | Vision impairment %                                                                                                                                                                                                                                                                                                                                                                                                                                                                                                                                                                                                                                                                                                                                                                                                                                                                                                                                                                                                                                                                                                                                                                                                                                                                                                                                                                                                                                                                                  | 58                                                                                                                                                                                                                                                                                                                                                                                                                                                                                                                                                                                                                                                                                                                                                                                                                                                                                                                   |                   |   |      |                                                                              |                                                                                                                                                                                                                                                                                                                                                                                                                                |           |                   |                                                                                                                                                                                                                                                                                                                                                                                                  |                                                                                                                                                                                                                                  |              |                                            |                                                                                                                                                                                                                         |                                                                           |          |           |                   |              |      |  |                              |      |       |                                                  |      |                                        |                                                                                                                                                                                                                                                                                                                                                                                                                                                                                                                                                                                                                                                                                                                                                                                                                                                                                                                                                                                                                                                                                                                                                                                                                                                                                                                                                                                                                                                                                                                                                                                                                                                                                                                                                                                                                                                                                                                                                                                                                                                                                                                                                                                   |      |                                        |     |                                                                              |      |                                                                                                                                                                                                                                                                                                                                                                                                                                                                                                                                                                                                                                                                                                                                                                                                                                                                                                                                                                                                                                                                                                                                                                                                                                                                                                                                                                                                                                                                                                      |              |                  |     |              |       |                       |                   |                                                                                                                    |           |              |                                                                                                                                                                                                                                                                                                                                                                                                                                                                                                                                                                                                                                                                                                                                                                                         |                                                                                                             |
| How                                 | Face-to-face                                                                                                                                                                                                                                                                                                                                                                                                                                                                                                                                                                                                                                                                                                                                                                                                                                                                                                                                                                                                                                                                                                                                                                                                                                                                                                                                                                                                                                                                                         |                                                                                                                                                                                                                                                                                                                                                                                                                                                                                                                                                                                                                                                                                                                                                                                                                                                                                                                      |                   |   |      |                                                                              |                                                                                                                                                                                                                                                                                                                                                                                                                                |           |                   |                                                                                                                                                                                                                                                                                                                                                                                                  |                                                                                                                                                                                                                                  |              |                                            |                                                                                                                                                                                                                         |                                                                           |          |           |                   |              |      |  |                              |      |       |                                                  |      |                                        |                                                                                                                                                                                                                                                                                                                                                                                                                                                                                                                                                                                                                                                                                                                                                                                                                                                                                                                                                                                                                                                                                                                                                                                                                                                                                                                                                                                                                                                                                                                                                                                                                                                                                                                                                                                                                                                                                                                                                                                                                                                                                                                                                                                   |      |                                        |     |                                                                              |      |                                                                                                                                                                                                                                                                                                                                                                                                                                                                                                                                                                                                                                                                                                                                                                                                                                                                                                                                                                                                                                                                                                                                                                                                                                                                                                                                                                                                                                                                                                      |              |                  |     |              |       |                       |                   |                                                                                                                    |           |              |                                                                                                                                                                                                                                                                                                                                                                                                                                                                                                                                                                                                                                                                                                                                                                                         |                                                                                                             |
| Where                               | The practical workshop was delivered at a fully accessible resource centre in central Rotherham. Participants were provided travel support.                                                                                                                                                                                                                                                                                                                                                                                                                                                                                                                                                                                                                                                                                                                                                                                                                                                                                                                                                                                                                                                                                                                                                                                                                                                                                                                                                          |                                                                                                                                                                                                                                                                                                                                                                                                                                                                                                                                                                                                                                                                                                                                                                                                                                                                                                                      |                   |   |      |                                                                              |                                                                                                                                                                                                                                                                                                                                                                                                                                |           |                   |                                                                                                                                                                                                                                                                                                                                                                                                  |                                                                                                                                                                                                                                  |              |                                            |                                                                                                                                                                                                                         |                                                                           |          |           |                   |              |      |  |                              |      |       |                                                  |      |                                        |                                                                                                                                                                                                                                                                                                                                                                                                                                                                                                                                                                                                                                                                                                                                                                                                                                                                                                                                                                                                                                                                                                                                                                                                                                                                                                                                                                                                                                                                                                                                                                                                                                                                                                                                                                                                                                                                                                                                                                                                                                                                                                                                                                                   |      |                                        |     |                                                                              |      |                                                                                                                                                                                                                                                                                                                                                                                                                                                                                                                                                                                                                                                                                                                                                                                                                                                                                                                                                                                                                                                                                                                                                                                                                                                                                                                                                                                                                                                                                                      |              |                  |     |              |       |                       |                   |                                                                                                                    |           |              |                                                                                                                                                                                                                                                                                                                                                                                                                                                                                                                                                                                                                                                                                                                                                                                         |                                                                                                             |
| When and How Much                   | 12 weeks                                                                                                                                                                                                                                                                                                                                                                                                                                                                                                                                                                                                                                                                                                                                                                                                                                                                                                                                                                                                                                                                                                                                                                                                                                                                                                                                                                                                                                                                                             |                                                                                                                                                                                                                                                                                                                                                                                                                                                                                                                                                                                                                                                                                                                                                                                                                                                                                                                      |                   |   |      |                                                                              |                                                                                                                                                                                                                                                                                                                                                                                                                                |           |                   |                                                                                                                                                                                                                                                                                                                                                                                                  |                                                                                                                                                                                                                                  |              |                                            |                                                                                                                                                                                                                         |                                                                           |          |           |                   |              |      |  |                              |      |       |                                                  |      |                                        |                                                                                                                                                                                                                                                                                                                                                                                                                                                                                                                                                                                                                                                                                                                                                                                                                                                                                                                                                                                                                                                                                                                                                                                                                                                                                                                                                                                                                                                                                                                                                                                                                                                                                                                                                                                                                                                                                                                                                                                                                                                                                                                                                                                   |      |                                        |     |                                                                              |      |                                                                                                                                                                                                                                                                                                                                                                                                                                                                                                                                                                                                                                                                                                                                                                                                                                                                                                                                                                                                                                                                                                                                                                                                                                                                                                                                                                                                                                                                                                      |              |                  |     |              |       |                       |                   |                                                                                                                    |           |              |                                                                                                                                                                                                                                                                                                                                                                                                                                                                                                                                                                                                                                                                                                                                                                                         |                                                                                                             |
| Tailoring                           | Personalized                                                                                                                                                                                                                                                                                                                                                                                                                                                                                                                                                                                                                                                                                                                                                                                                                                                                                                                                                                                                                                                                                                                                                                                                                                                                                                                                                                                                                                                                                         |                                                                                                                                                                                                                                                                                                                                                                                                                                                                                                                                                                                                                                                                                                                                                                                                                                                                                                                      |                   |   |      |                                                                              |                                                                                                                                                                                                                                                                                                                                                                                                                                |           |                   |                                                                                                                                                                                                                                                                                                                                                                                                  |                                                                                                                                                                                                                                  |              |                                            |                                                                                                                                                                                                                         |                                                                           |          |           |                   |              |      |  |                              |      |       |                                                  |      |                                        |                                                                                                                                                                                                                                                                                                                                                                                                                                                                                                                                                                                                                                                                                                                                                                                                                                                                                                                                                                                                                                                                                                                                                                                                                                                                                                                                                                                                                                                                                                                                                                                                                                                                                                                                                                                                                                                                                                                                                                                                                                                                                                                                                                                   |      |                                        |     |                                                                              |      |                                                                                                                                                                                                                                                                                                                                                                                                                                                                                                                                                                                                                                                                                                                                                                                                                                                                                                                                                                                                                                                                                                                                                                                                                                                                                                                                                                                                                                                                                                      |              |                  |     |              |       |                       |                   |                                                                                                                    |           |              |                                                                                                                                                                                                                                                                                                                                                                                                                                                                                                                                                                                                                                                                                                                                                                                         |                                                                                                             |
| Weld 2015 (88)                      | <p>Uncontrolled before-and-after study, mixed-methods</p> <p>Study length:<br/>Aug 13-Nov 14 (15 months)</p>                                                                                                                                                                                                                                                                                                                                                                                                                                                                                                                                                                                                                                                                                                                                                                                                                                                                                                                                                                                                                                                                                                                                                                                                                                                                                                                                                                                         | <p><b>Inclusion criteria:</b></p> <p>- adults (18 years +) living in South Ward who are experiencing low to moderate mental health difficulties (depression, low mood, anxiety) or isolation</p> <p><b>Exclusion criteria:</b> -</p> <p>Baseline characteristics:</p> <table border="1"> <tr> <td>N</td> <td></td> <td>79</td> </tr> <tr> <td>Age</td> <td>Mean (Range)</td> <td>45 (14.5)</td> </tr> <tr> <td>Gender</td> <td>Female %</td> <td>78.5</td> </tr> <tr> <td>Ethnicity</td> <td>White british %</td> <td>87.3</td> </tr> <tr> <td>Living arrangement</td> <td>-</td> <td>-</td> </tr> <tr> <td>Employment status</td> <td>Unemployed %</td> <td>31.6</td> </tr> <tr> <td></td> <td>Longterm sick and disabled %</td> <td>21.5</td> </tr> <tr> <td>Other</td> <td>At least one long term condition or disability %</td> <td>63.3</td> </tr> </table> <p>Population: Special (mental health problems)</p> | N                 |   | 79   | Age                                                                          | Mean (Range)                                                                                                                                                                                                                                                                                                                                                                                                                   | 45 (14.5) | Gender            | Female %                                                                                                                                                                                                                                                                                                                                                                                         | 78.5                                                                                                                                                                                                                             | Ethnicity    | White british %                            | 87.3                                                                                                                                                                                                                    | Living arrangement                                                        | -        | -         | Employment status | Unemployed % | 31.6 |  | Longterm sick and disabled % | 21.5 | Other | At least one long term condition or disability % | 63.3 | <p>Primary care</p> <p>Country: UK</p> | <table border="1"> <tr> <td>Name</td> <td>Healthier Way to Live Programme (HWTL)</td> </tr> <tr> <td>Why</td> <td>Improving the mental health and wellbeing, and social support and resilience</td> </tr> <tr> <td>What</td> <td> <p>Self-referral and referral from partner agencies</p> <ul style="list-style-type: none"> <li>- it uses a solution focussed approach to support participants to explore their situation, identify future action to improve their situation and develop an action plan to achieve health and wellbeing goals</li> <li>- also includes referral and introduction to other elements of the FAHLCs' Wellbeing Project when appropriate, and to other local agencies for specialist support</li> <li>- 8 local projects deliver a broad base of linked social, non-medical alternatives to positive health promotion that include lunch clubs, community kitchens, weight management groups, community allotments, befriending groups, collective arts and creative activities</li> <li>- Wellbeing group: weekly group for more isolated people providing mutual contact and support</li> <li>- Volunteering: support to introduce and support people from the project to existing volunteering opportunities in the centre including; café work, allotment group, 'welcomers'</li> <li>- Physical activity: supporting and developing existing activity groups; walking, swimming, local gym and developing new activities for people with weight management issues and diabetes</li> <li>- Café time: working with local people to increase information and experience of healthy eating options in the FAHLC café</li> <li>- group sessions: develop an action plan with Wellbeing Worker</li> </ul> </td> </tr> <tr> <td>Who provided</td> <td>Wellbeing Worker</td> </tr> <tr> <td>How</td> <td>Face-to-face</td> </tr> <tr> <td>Where</td> <td>Healthy Living Centre</td> </tr> <tr> <td>When and How Much</td> <td>One introductory session and up to six 1:1 sessions after this, wellbeing group weekly, group sessions for 8 weeks</td> </tr> <tr> <td>Tailoring</td> <td>Personalized</td> </tr> </table> <p>Intervention: Holistic</p> | Name | Healthier Way to Live Programme (HWTL) | Why | Improving the mental health and wellbeing, and social support and resilience | What | <p>Self-referral and referral from partner agencies</p> <ul style="list-style-type: none"> <li>- it uses a solution focussed approach to support participants to explore their situation, identify future action to improve their situation and develop an action plan to achieve health and wellbeing goals</li> <li>- also includes referral and introduction to other elements of the FAHLCs' Wellbeing Project when appropriate, and to other local agencies for specialist support</li> <li>- 8 local projects deliver a broad base of linked social, non-medical alternatives to positive health promotion that include lunch clubs, community kitchens, weight management groups, community allotments, befriending groups, collective arts and creative activities</li> <li>- Wellbeing group: weekly group for more isolated people providing mutual contact and support</li> <li>- Volunteering: support to introduce and support people from the project to existing volunteering opportunities in the centre including; café work, allotment group, 'welcomers'</li> <li>- Physical activity: supporting and developing existing activity groups; walking, swimming, local gym and developing new activities for people with weight management issues and diabetes</li> <li>- Café time: working with local people to increase information and experience of healthy eating options in the FAHLC café</li> <li>- group sessions: develop an action plan with Wellbeing Worker</li> </ul> | Who provided | Wellbeing Worker | How | Face-to-face | Where | Healthy Living Centre | When and How Much | One introductory session and up to six 1:1 sessions after this, wellbeing group weekly, group sessions for 8 weeks | Tailoring | Personalized | <p>Patient outcome (for all participants at baseline and matched group at baseline, endpoint 8 weeks and follow-up 3 months after first endpoint):</p> <ul style="list-style-type: none"> <li>- Shortened seven item version of the Centre for Epidemiological Studies Depression Scale (CES-D)</li> <li>- Healthy Connections wellbeing questionnaire (two questions mental ill health: anxiety)</li> <li>- overall life satisfaction (questionnaire with a 10 point rating)</li> <li>- SWEMWBS (Short Warwick Edinburgh Mental Wellbeing Scale) mental social wellbeing (5 questions)</li> <li>- physical activity*</li> <li>- Exit Questionnaire*</li> <li>- longer term outcomes*</li> </ul> <p>Economic evaluation:</p> <ul style="list-style-type: none"> <li>- - SROI</li> </ul> | <p>Peer-Review:<br/>No</p> <p>Funding source: Big Lottery</p> <p>Declaration of interest: not mentioned</p> |
| N                                   |                                                                                                                                                                                                                                                                                                                                                                                                                                                                                                                                                                                                                                                                                                                                                                                                                                                                                                                                                                                                                                                                                                                                                                                                                                                                                                                                                                                                                                                                                                      | 79                                                                                                                                                                                                                                                                                                                                                                                                                                                                                                                                                                                                                                                                                                                                                                                                                                                                                                                   |                   |   |      |                                                                              |                                                                                                                                                                                                                                                                                                                                                                                                                                |           |                   |                                                                                                                                                                                                                                                                                                                                                                                                  |                                                                                                                                                                                                                                  |              |                                            |                                                                                                                                                                                                                         |                                                                           |          |           |                   |              |      |  |                              |      |       |                                                  |      |                                        |                                                                                                                                                                                                                                                                                                                                                                                                                                                                                                                                                                                                                                                                                                                                                                                                                                                                                                                                                                                                                                                                                                                                                                                                                                                                                                                                                                                                                                                                                                                                                                                                                                                                                                                                                                                                                                                                                                                                                                                                                                                                                                                                                                                   |      |                                        |     |                                                                              |      |                                                                                                                                                                                                                                                                                                                                                                                                                                                                                                                                                                                                                                                                                                                                                                                                                                                                                                                                                                                                                                                                                                                                                                                                                                                                                                                                                                                                                                                                                                      |              |                  |     |              |       |                       |                   |                                                                                                                    |           |              |                                                                                                                                                                                                                                                                                                                                                                                                                                                                                                                                                                                                                                                                                                                                                                                         |                                                                                                             |
| Age                                 | Mean (Range)                                                                                                                                                                                                                                                                                                                                                                                                                                                                                                                                                                                                                                                                                                                                                                                                                                                                                                                                                                                                                                                                                                                                                                                                                                                                                                                                                                                                                                                                                         | 45 (14.5)                                                                                                                                                                                                                                                                                                                                                                                                                                                                                                                                                                                                                                                                                                                                                                                                                                                                                                            |                   |   |      |                                                                              |                                                                                                                                                                                                                                                                                                                                                                                                                                |           |                   |                                                                                                                                                                                                                                                                                                                                                                                                  |                                                                                                                                                                                                                                  |              |                                            |                                                                                                                                                                                                                         |                                                                           |          |           |                   |              |      |  |                              |      |       |                                                  |      |                                        |                                                                                                                                                                                                                                                                                                                                                                                                                                                                                                                                                                                                                                                                                                                                                                                                                                                                                                                                                                                                                                                                                                                                                                                                                                                                                                                                                                                                                                                                                                                                                                                                                                                                                                                                                                                                                                                                                                                                                                                                                                                                                                                                                                                   |      |                                        |     |                                                                              |      |                                                                                                                                                                                                                                                                                                                                                                                                                                                                                                                                                                                                                                                                                                                                                                                                                                                                                                                                                                                                                                                                                                                                                                                                                                                                                                                                                                                                                                                                                                      |              |                  |     |              |       |                       |                   |                                                                                                                    |           |              |                                                                                                                                                                                                                                                                                                                                                                                                                                                                                                                                                                                                                                                                                                                                                                                         |                                                                                                             |
| Gender                              | Female %                                                                                                                                                                                                                                                                                                                                                                                                                                                                                                                                                                                                                                                                                                                                                                                                                                                                                                                                                                                                                                                                                                                                                                                                                                                                                                                                                                                                                                                                                             | 78.5                                                                                                                                                                                                                                                                                                                                                                                                                                                                                                                                                                                                                                                                                                                                                                                                                                                                                                                 |                   |   |      |                                                                              |                                                                                                                                                                                                                                                                                                                                                                                                                                |           |                   |                                                                                                                                                                                                                                                                                                                                                                                                  |                                                                                                                                                                                                                                  |              |                                            |                                                                                                                                                                                                                         |                                                                           |          |           |                   |              |      |  |                              |      |       |                                                  |      |                                        |                                                                                                                                                                                                                                                                                                                                                                                                                                                                                                                                                                                                                                                                                                                                                                                                                                                                                                                                                                                                                                                                                                                                                                                                                                                                                                                                                                                                                                                                                                                                                                                                                                                                                                                                                                                                                                                                                                                                                                                                                                                                                                                                                                                   |      |                                        |     |                                                                              |      |                                                                                                                                                                                                                                                                                                                                                                                                                                                                                                                                                                                                                                                                                                                                                                                                                                                                                                                                                                                                                                                                                                                                                                                                                                                                                                                                                                                                                                                                                                      |              |                  |     |              |       |                       |                   |                                                                                                                    |           |              |                                                                                                                                                                                                                                                                                                                                                                                                                                                                                                                                                                                                                                                                                                                                                                                         |                                                                                                             |
| Ethnicity                           | White british %                                                                                                                                                                                                                                                                                                                                                                                                                                                                                                                                                                                                                                                                                                                                                                                                                                                                                                                                                                                                                                                                                                                                                                                                                                                                                                                                                                                                                                                                                      | 87.3                                                                                                                                                                                                                                                                                                                                                                                                                                                                                                                                                                                                                                                                                                                                                                                                                                                                                                                 |                   |   |      |                                                                              |                                                                                                                                                                                                                                                                                                                                                                                                                                |           |                   |                                                                                                                                                                                                                                                                                                                                                                                                  |                                                                                                                                                                                                                                  |              |                                            |                                                                                                                                                                                                                         |                                                                           |          |           |                   |              |      |  |                              |      |       |                                                  |      |                                        |                                                                                                                                                                                                                                                                                                                                                                                                                                                                                                                                                                                                                                                                                                                                                                                                                                                                                                                                                                                                                                                                                                                                                                                                                                                                                                                                                                                                                                                                                                                                                                                                                                                                                                                                                                                                                                                                                                                                                                                                                                                                                                                                                                                   |      |                                        |     |                                                                              |      |                                                                                                                                                                                                                                                                                                                                                                                                                                                                                                                                                                                                                                                                                                                                                                                                                                                                                                                                                                                                                                                                                                                                                                                                                                                                                                                                                                                                                                                                                                      |              |                  |     |              |       |                       |                   |                                                                                                                    |           |              |                                                                                                                                                                                                                                                                                                                                                                                                                                                                                                                                                                                                                                                                                                                                                                                         |                                                                                                             |
| Living arrangement                  | -                                                                                                                                                                                                                                                                                                                                                                                                                                                                                                                                                                                                                                                                                                                                                                                                                                                                                                                                                                                                                                                                                                                                                                                                                                                                                                                                                                                                                                                                                                    | -                                                                                                                                                                                                                                                                                                                                                                                                                                                                                                                                                                                                                                                                                                                                                                                                                                                                                                                    |                   |   |      |                                                                              |                                                                                                                                                                                                                                                                                                                                                                                                                                |           |                   |                                                                                                                                                                                                                                                                                                                                                                                                  |                                                                                                                                                                                                                                  |              |                                            |                                                                                                                                                                                                                         |                                                                           |          |           |                   |              |      |  |                              |      |       |                                                  |      |                                        |                                                                                                                                                                                                                                                                                                                                                                                                                                                                                                                                                                                                                                                                                                                                                                                                                                                                                                                                                                                                                                                                                                                                                                                                                                                                                                                                                                                                                                                                                                                                                                                                                                                                                                                                                                                                                                                                                                                                                                                                                                                                                                                                                                                   |      |                                        |     |                                                                              |      |                                                                                                                                                                                                                                                                                                                                                                                                                                                                                                                                                                                                                                                                                                                                                                                                                                                                                                                                                                                                                                                                                                                                                                                                                                                                                                                                                                                                                                                                                                      |              |                  |     |              |       |                       |                   |                                                                                                                    |           |              |                                                                                                                                                                                                                                                                                                                                                                                                                                                                                                                                                                                                                                                                                                                                                                                         |                                                                                                             |
| Employment status                   | Unemployed %                                                                                                                                                                                                                                                                                                                                                                                                                                                                                                                                                                                                                                                                                                                                                                                                                                                                                                                                                                                                                                                                                                                                                                                                                                                                                                                                                                                                                                                                                         | 31.6                                                                                                                                                                                                                                                                                                                                                                                                                                                                                                                                                                                                                                                                                                                                                                                                                                                                                                                 |                   |   |      |                                                                              |                                                                                                                                                                                                                                                                                                                                                                                                                                |           |                   |                                                                                                                                                                                                                                                                                                                                                                                                  |                                                                                                                                                                                                                                  |              |                                            |                                                                                                                                                                                                                         |                                                                           |          |           |                   |              |      |  |                              |      |       |                                                  |      |                                        |                                                                                                                                                                                                                                                                                                                                                                                                                                                                                                                                                                                                                                                                                                                                                                                                                                                                                                                                                                                                                                                                                                                                                                                                                                                                                                                                                                                                                                                                                                                                                                                                                                                                                                                                                                                                                                                                                                                                                                                                                                                                                                                                                                                   |      |                                        |     |                                                                              |      |                                                                                                                                                                                                                                                                                                                                                                                                                                                                                                                                                                                                                                                                                                                                                                                                                                                                                                                                                                                                                                                                                                                                                                                                                                                                                                                                                                                                                                                                                                      |              |                  |     |              |       |                       |                   |                                                                                                                    |           |              |                                                                                                                                                                                                                                                                                                                                                                                                                                                                                                                                                                                                                                                                                                                                                                                         |                                                                                                             |
|                                     | Longterm sick and disabled %                                                                                                                                                                                                                                                                                                                                                                                                                                                                                                                                                                                                                                                                                                                                                                                                                                                                                                                                                                                                                                                                                                                                                                                                                                                                                                                                                                                                                                                                         | 21.5                                                                                                                                                                                                                                                                                                                                                                                                                                                                                                                                                                                                                                                                                                                                                                                                                                                                                                                 |                   |   |      |                                                                              |                                                                                                                                                                                                                                                                                                                                                                                                                                |           |                   |                                                                                                                                                                                                                                                                                                                                                                                                  |                                                                                                                                                                                                                                  |              |                                            |                                                                                                                                                                                                                         |                                                                           |          |           |                   |              |      |  |                              |      |       |                                                  |      |                                        |                                                                                                                                                                                                                                                                                                                                                                                                                                                                                                                                                                                                                                                                                                                                                                                                                                                                                                                                                                                                                                                                                                                                                                                                                                                                                                                                                                                                                                                                                                                                                                                                                                                                                                                                                                                                                                                                                                                                                                                                                                                                                                                                                                                   |      |                                        |     |                                                                              |      |                                                                                                                                                                                                                                                                                                                                                                                                                                                                                                                                                                                                                                                                                                                                                                                                                                                                                                                                                                                                                                                                                                                                                                                                                                                                                                                                                                                                                                                                                                      |              |                  |     |              |       |                       |                   |                                                                                                                    |           |              |                                                                                                                                                                                                                                                                                                                                                                                                                                                                                                                                                                                                                                                                                                                                                                                         |                                                                                                             |
| Other                               | At least one long term condition or disability %                                                                                                                                                                                                                                                                                                                                                                                                                                                                                                                                                                                                                                                                                                                                                                                                                                                                                                                                                                                                                                                                                                                                                                                                                                                                                                                                                                                                                                                     | 63.3                                                                                                                                                                                                                                                                                                                                                                                                                                                                                                                                                                                                                                                                                                                                                                                                                                                                                                                 |                   |   |      |                                                                              |                                                                                                                                                                                                                                                                                                                                                                                                                                |           |                   |                                                                                                                                                                                                                                                                                                                                                                                                  |                                                                                                                                                                                                                                  |              |                                            |                                                                                                                                                                                                                         |                                                                           |          |           |                   |              |      |  |                              |      |       |                                                  |      |                                        |                                                                                                                                                                                                                                                                                                                                                                                                                                                                                                                                                                                                                                                                                                                                                                                                                                                                                                                                                                                                                                                                                                                                                                                                                                                                                                                                                                                                                                                                                                                                                                                                                                                                                                                                                                                                                                                                                                                                                                                                                                                                                                                                                                                   |      |                                        |     |                                                                              |      |                                                                                                                                                                                                                                                                                                                                                                                                                                                                                                                                                                                                                                                                                                                                                                                                                                                                                                                                                                                                                                                                                                                                                                                                                                                                                                                                                                                                                                                                                                      |              |                  |     |              |       |                       |                   |                                                                                                                    |           |              |                                                                                                                                                                                                                                                                                                                                                                                                                                                                                                                                                                                                                                                                                                                                                                                         |                                                                                                             |
| Name                                | Healthier Way to Live Programme (HWTL)                                                                                                                                                                                                                                                                                                                                                                                                                                                                                                                                                                                                                                                                                                                                                                                                                                                                                                                                                                                                                                                                                                                                                                                                                                                                                                                                                                                                                                                               |                                                                                                                                                                                                                                                                                                                                                                                                                                                                                                                                                                                                                                                                                                                                                                                                                                                                                                                      |                   |   |      |                                                                              |                                                                                                                                                                                                                                                                                                                                                                                                                                |           |                   |                                                                                                                                                                                                                                                                                                                                                                                                  |                                                                                                                                                                                                                                  |              |                                            |                                                                                                                                                                                                                         |                                                                           |          |           |                   |              |      |  |                              |      |       |                                                  |      |                                        |                                                                                                                                                                                                                                                                                                                                                                                                                                                                                                                                                                                                                                                                                                                                                                                                                                                                                                                                                                                                                                                                                                                                                                                                                                                                                                                                                                                                                                                                                                                                                                                                                                                                                                                                                                                                                                                                                                                                                                                                                                                                                                                                                                                   |      |                                        |     |                                                                              |      |                                                                                                                                                                                                                                                                                                                                                                                                                                                                                                                                                                                                                                                                                                                                                                                                                                                                                                                                                                                                                                                                                                                                                                                                                                                                                                                                                                                                                                                                                                      |              |                  |     |              |       |                       |                   |                                                                                                                    |           |              |                                                                                                                                                                                                                                                                                                                                                                                                                                                                                                                                                                                                                                                                                                                                                                                         |                                                                                                             |
| Why                                 | Improving the mental health and wellbeing, and social support and resilience                                                                                                                                                                                                                                                                                                                                                                                                                                                                                                                                                                                                                                                                                                                                                                                                                                                                                                                                                                                                                                                                                                                                                                                                                                                                                                                                                                                                                         |                                                                                                                                                                                                                                                                                                                                                                                                                                                                                                                                                                                                                                                                                                                                                                                                                                                                                                                      |                   |   |      |                                                                              |                                                                                                                                                                                                                                                                                                                                                                                                                                |           |                   |                                                                                                                                                                                                                                                                                                                                                                                                  |                                                                                                                                                                                                                                  |              |                                            |                                                                                                                                                                                                                         |                                                                           |          |           |                   |              |      |  |                              |      |       |                                                  |      |                                        |                                                                                                                                                                                                                                                                                                                                                                                                                                                                                                                                                                                                                                                                                                                                                                                                                                                                                                                                                                                                                                                                                                                                                                                                                                                                                                                                                                                                                                                                                                                                                                                                                                                                                                                                                                                                                                                                                                                                                                                                                                                                                                                                                                                   |      |                                        |     |                                                                              |      |                                                                                                                                                                                                                                                                                                                                                                                                                                                                                                                                                                                                                                                                                                                                                                                                                                                                                                                                                                                                                                                                                                                                                                                                                                                                                                                                                                                                                                                                                                      |              |                  |     |              |       |                       |                   |                                                                                                                    |           |              |                                                                                                                                                                                                                                                                                                                                                                                                                                                                                                                                                                                                                                                                                                                                                                                         |                                                                                                             |
| What                                | <p>Self-referral and referral from partner agencies</p> <ul style="list-style-type: none"> <li>- it uses a solution focussed approach to support participants to explore their situation, identify future action to improve their situation and develop an action plan to achieve health and wellbeing goals</li> <li>- also includes referral and introduction to other elements of the FAHLCs' Wellbeing Project when appropriate, and to other local agencies for specialist support</li> <li>- 8 local projects deliver a broad base of linked social, non-medical alternatives to positive health promotion that include lunch clubs, community kitchens, weight management groups, community allotments, befriending groups, collective arts and creative activities</li> <li>- Wellbeing group: weekly group for more isolated people providing mutual contact and support</li> <li>- Volunteering: support to introduce and support people from the project to existing volunteering opportunities in the centre including; café work, allotment group, 'welcomers'</li> <li>- Physical activity: supporting and developing existing activity groups; walking, swimming, local gym and developing new activities for people with weight management issues and diabetes</li> <li>- Café time: working with local people to increase information and experience of healthy eating options in the FAHLC café</li> <li>- group sessions: develop an action plan with Wellbeing Worker</li> </ul> |                                                                                                                                                                                                                                                                                                                                                                                                                                                                                                                                                                                                                                                                                                                                                                                                                                                                                                                      |                   |   |      |                                                                              |                                                                                                                                                                                                                                                                                                                                                                                                                                |           |                   |                                                                                                                                                                                                                                                                                                                                                                                                  |                                                                                                                                                                                                                                  |              |                                            |                                                                                                                                                                                                                         |                                                                           |          |           |                   |              |      |  |                              |      |       |                                                  |      |                                        |                                                                                                                                                                                                                                                                                                                                                                                                                                                                                                                                                                                                                                                                                                                                                                                                                                                                                                                                                                                                                                                                                                                                                                                                                                                                                                                                                                                                                                                                                                                                                                                                                                                                                                                                                                                                                                                                                                                                                                                                                                                                                                                                                                                   |      |                                        |     |                                                                              |      |                                                                                                                                                                                                                                                                                                                                                                                                                                                                                                                                                                                                                                                                                                                                                                                                                                                                                                                                                                                                                                                                                                                                                                                                                                                                                                                                                                                                                                                                                                      |              |                  |     |              |       |                       |                   |                                                                                                                    |           |              |                                                                                                                                                                                                                                                                                                                                                                                                                                                                                                                                                                                                                                                                                                                                                                                         |                                                                                                             |
| Who provided                        | Wellbeing Worker                                                                                                                                                                                                                                                                                                                                                                                                                                                                                                                                                                                                                                                                                                                                                                                                                                                                                                                                                                                                                                                                                                                                                                                                                                                                                                                                                                                                                                                                                     |                                                                                                                                                                                                                                                                                                                                                                                                                                                                                                                                                                                                                                                                                                                                                                                                                                                                                                                      |                   |   |      |                                                                              |                                                                                                                                                                                                                                                                                                                                                                                                                                |           |                   |                                                                                                                                                                                                                                                                                                                                                                                                  |                                                                                                                                                                                                                                  |              |                                            |                                                                                                                                                                                                                         |                                                                           |          |           |                   |              |      |  |                              |      |       |                                                  |      |                                        |                                                                                                                                                                                                                                                                                                                                                                                                                                                                                                                                                                                                                                                                                                                                                                                                                                                                                                                                                                                                                                                                                                                                                                                                                                                                                                                                                                                                                                                                                                                                                                                                                                                                                                                                                                                                                                                                                                                                                                                                                                                                                                                                                                                   |      |                                        |     |                                                                              |      |                                                                                                                                                                                                                                                                                                                                                                                                                                                                                                                                                                                                                                                                                                                                                                                                                                                                                                                                                                                                                                                                                                                                                                                                                                                                                                                                                                                                                                                                                                      |              |                  |     |              |       |                       |                   |                                                                                                                    |           |              |                                                                                                                                                                                                                                                                                                                                                                                                                                                                                                                                                                                                                                                                                                                                                                                         |                                                                                                             |
| How                                 | Face-to-face                                                                                                                                                                                                                                                                                                                                                                                                                                                                                                                                                                                                                                                                                                                                                                                                                                                                                                                                                                                                                                                                                                                                                                                                                                                                                                                                                                                                                                                                                         |                                                                                                                                                                                                                                                                                                                                                                                                                                                                                                                                                                                                                                                                                                                                                                                                                                                                                                                      |                   |   |      |                                                                              |                                                                                                                                                                                                                                                                                                                                                                                                                                |           |                   |                                                                                                                                                                                                                                                                                                                                                                                                  |                                                                                                                                                                                                                                  |              |                                            |                                                                                                                                                                                                                         |                                                                           |          |           |                   |              |      |  |                              |      |       |                                                  |      |                                        |                                                                                                                                                                                                                                                                                                                                                                                                                                                                                                                                                                                                                                                                                                                                                                                                                                                                                                                                                                                                                                                                                                                                                                                                                                                                                                                                                                                                                                                                                                                                                                                                                                                                                                                                                                                                                                                                                                                                                                                                                                                                                                                                                                                   |      |                                        |     |                                                                              |      |                                                                                                                                                                                                                                                                                                                                                                                                                                                                                                                                                                                                                                                                                                                                                                                                                                                                                                                                                                                                                                                                                                                                                                                                                                                                                                                                                                                                                                                                                                      |              |                  |     |              |       |                       |                   |                                                                                                                    |           |              |                                                                                                                                                                                                                                                                                                                                                                                                                                                                                                                                                                                                                                                                                                                                                                                         |                                                                                                             |
| Where                               | Healthy Living Centre                                                                                                                                                                                                                                                                                                                                                                                                                                                                                                                                                                                                                                                                                                                                                                                                                                                                                                                                                                                                                                                                                                                                                                                                                                                                                                                                                                                                                                                                                |                                                                                                                                                                                                                                                                                                                                                                                                                                                                                                                                                                                                                                                                                                                                                                                                                                                                                                                      |                   |   |      |                                                                              |                                                                                                                                                                                                                                                                                                                                                                                                                                |           |                   |                                                                                                                                                                                                                                                                                                                                                                                                  |                                                                                                                                                                                                                                  |              |                                            |                                                                                                                                                                                                                         |                                                                           |          |           |                   |              |      |  |                              |      |       |                                                  |      |                                        |                                                                                                                                                                                                                                                                                                                                                                                                                                                                                                                                                                                                                                                                                                                                                                                                                                                                                                                                                                                                                                                                                                                                                                                                                                                                                                                                                                                                                                                                                                                                                                                                                                                                                                                                                                                                                                                                                                                                                                                                                                                                                                                                                                                   |      |                                        |     |                                                                              |      |                                                                                                                                                                                                                                                                                                                                                                                                                                                                                                                                                                                                                                                                                                                                                                                                                                                                                                                                                                                                                                                                                                                                                                                                                                                                                                                                                                                                                                                                                                      |              |                  |     |              |       |                       |                   |                                                                                                                    |           |              |                                                                                                                                                                                                                                                                                                                                                                                                                                                                                                                                                                                                                                                                                                                                                                                         |                                                                                                             |
| When and How Much                   | One introductory session and up to six 1:1 sessions after this, wellbeing group weekly, group sessions for 8 weeks                                                                                                                                                                                                                                                                                                                                                                                                                                                                                                                                                                                                                                                                                                                                                                                                                                                                                                                                                                                                                                                                                                                                                                                                                                                                                                                                                                                   |                                                                                                                                                                                                                                                                                                                                                                                                                                                                                                                                                                                                                                                                                                                                                                                                                                                                                                                      |                   |   |      |                                                                              |                                                                                                                                                                                                                                                                                                                                                                                                                                |           |                   |                                                                                                                                                                                                                                                                                                                                                                                                  |                                                                                                                                                                                                                                  |              |                                            |                                                                                                                                                                                                                         |                                                                           |          |           |                   |              |      |  |                              |      |       |                                                  |      |                                        |                                                                                                                                                                                                                                                                                                                                                                                                                                                                                                                                                                                                                                                                                                                                                                                                                                                                                                                                                                                                                                                                                                                                                                                                                                                                                                                                                                                                                                                                                                                                                                                                                                                                                                                                                                                                                                                                                                                                                                                                                                                                                                                                                                                   |      |                                        |     |                                                                              |      |                                                                                                                                                                                                                                                                                                                                                                                                                                                                                                                                                                                                                                                                                                                                                                                                                                                                                                                                                                                                                                                                                                                                                                                                                                                                                                                                                                                                                                                                                                      |              |                  |     |              |       |                       |                   |                                                                                                                    |           |              |                                                                                                                                                                                                                                                                                                                                                                                                                                                                                                                                                                                                                                                                                                                                                                                         |                                                                                                             |
| Tailoring                           | Personalized                                                                                                                                                                                                                                                                                                                                                                                                                                                                                                                                                                                                                                                                                                                                                                                                                                                                                                                                                                                                                                                                                                                                                                                                                                                                                                                                                                                                                                                                                         |                                                                                                                                                                                                                                                                                                                                                                                                                                                                                                                                                                                                                                                                                                                                                                                                                                                                                                                      |                   |   |      |                                                                              |                                                                                                                                                                                                                                                                                                                                                                                                                                |           |                   |                                                                                                                                                                                                                                                                                                                                                                                                  |                                                                                                                                                                                                                                  |              |                                            |                                                                                                                                                                                                                         |                                                                           |          |           |                   |              |      |  |                              |      |       |                                                  |      |                                        |                                                                                                                                                                                                                                                                                                                                                                                                                                                                                                                                                                                                                                                                                                                                                                                                                                                                                                                                                                                                                                                                                                                                                                                                                                                                                                                                                                                                                                                                                                                                                                                                                                                                                                                                                                                                                                                                                                                                                                                                                                                                                                                                                                                   |      |                                        |     |                                                                              |      |                                                                                                                                                                                                                                                                                                                                                                                                                                                                                                                                                                                                                                                                                                                                                                                                                                                                                                                                                                                                                                                                                                                                                                                                                                                                                                                                                                                                                                                                                                      |              |                  |     |              |       |                       |                   |                                                                                                                    |           |              |                                                                                                                                                                                                                                                                                                                                                                                                                                                                                                                                                                                                                                                                                                                                                                                         |                                                                                                             |
| Wellbeing Enterprises CIC 2019 (89) | <p>Uncontrolled before-and-after study</p> <p>Study length:<br/>-</p>                                                                                                                                                                                                                                                                                                                                                                                                                                                                                                                                                                                                                                                                                                                                                                                                                                                                                                                                                                                                                                                                                                                                                                                                                                                                                                                                                                                                                                | <p><b>Inclusion criteria:</b> -</p> <p><b>Exclusion criteria:</b> -</p> <p>Baseline characteristics:</p> <table border="1"> <tr> <td>N</td> <td></td> <td>3892</td> </tr> </table>                                                                                                                                                                                                                                                                                                                                                                                                                                                                                                                                                                                                                                                                                                                                   | N                 |   | 3892 | <p>Primary Care</p> <p>Country:<br/>UK (Halton, St. Helens and Knowsley,</p> | <table border="1"> <tr> <td>Name</td> <td>Ways to Wellbeing</td> </tr> <tr> <td>Why</td> <td>The program aims to support participants to take control of their own health and to support medical professionals to see patients in the context in which they live their lives and how this affects their health and wellbeing.</td> </tr> <tr> <td>What</td> <td>Step 1: referral from a variety of sources</td> </tr> </table> | Name      | Ways to Wellbeing | Why                                                                                                                                                                                                                                                                                                                                                                                              | The program aims to support participants to take control of their own health and to support medical professionals to see patients in the context in which they live their lives and how this affects their health and wellbeing. | What         | Step 1: referral from a variety of sources | <p>Patient outcome At Baseline and follow-up:</p> <ul style="list-style-type: none"> <li>- Overall Wellbeing</li> <li>- Depression symptoms</li> <li>- Loneliness and social isolation</li> <li>- Medication</li> </ul> | <p>Peer-Review:<br/>No</p> <p>Funding source:<br/>St. Helens Council,</p> |          |           |                   |              |      |  |                              |      |       |                                                  |      |                                        |                                                                                                                                                                                                                                                                                                                                                                                                                                                                                                                                                                                                                                                                                                                                                                                                                                                                                                                                                                                                                                                                                                                                                                                                                                                                                                                                                                                                                                                                                                                                                                                                                                                                                                                                                                                                                                                                                                                                                                                                                                                                                                                                                                                   |      |                                        |     |                                                                              |      |                                                                                                                                                                                                                                                                                                                                                                                                                                                                                                                                                                                                                                                                                                                                                                                                                                                                                                                                                                                                                                                                                                                                                                                                                                                                                                                                                                                                                                                                                                      |              |                  |     |              |       |                       |                   |                                                                                                                    |           |              |                                                                                                                                                                                                                                                                                                                                                                                                                                                                                                                                                                                                                                                                                                                                                                                         |                                                                                                             |
| N                                   |                                                                                                                                                                                                                                                                                                                                                                                                                                                                                                                                                                                                                                                                                                                                                                                                                                                                                                                                                                                                                                                                                                                                                                                                                                                                                                                                                                                                                                                                                                      | 3892                                                                                                                                                                                                                                                                                                                                                                                                                                                                                                                                                                                                                                                                                                                                                                                                                                                                                                                 |                   |   |      |                                                                              |                                                                                                                                                                                                                                                                                                                                                                                                                                |           |                   |                                                                                                                                                                                                                                                                                                                                                                                                  |                                                                                                                                                                                                                                  |              |                                            |                                                                                                                                                                                                                         |                                                                           |          |           |                   |              |      |  |                              |      |       |                                                  |      |                                        |                                                                                                                                                                                                                                                                                                                                                                                                                                                                                                                                                                                                                                                                                                                                                                                                                                                                                                                                                                                                                                                                                                                                                                                                                                                                                                                                                                                                                                                                                                                                                                                                                                                                                                                                                                                                                                                                                                                                                                                                                                                                                                                                                                                   |      |                                        |     |                                                                              |      |                                                                                                                                                                                                                                                                                                                                                                                                                                                                                                                                                                                                                                                                                                                                                                                                                                                                                                                                                                                                                                                                                                                                                                                                                                                                                                                                                                                                                                                                                                      |              |                  |     |              |       |                       |                   |                                                                                                                    |           |              |                                                                                                                                                                                                                                                                                                                                                                                                                                                                                                                                                                                                                                                                                                                                                                                         |                                                                                                             |
| Name                                | Ways to Wellbeing                                                                                                                                                                                                                                                                                                                                                                                                                                                                                                                                                                                                                                                                                                                                                                                                                                                                                                                                                                                                                                                                                                                                                                                                                                                                                                                                                                                                                                                                                    |                                                                                                                                                                                                                                                                                                                                                                                                                                                                                                                                                                                                                                                                                                                                                                                                                                                                                                                      |                   |   |      |                                                                              |                                                                                                                                                                                                                                                                                                                                                                                                                                |           |                   |                                                                                                                                                                                                                                                                                                                                                                                                  |                                                                                                                                                                                                                                  |              |                                            |                                                                                                                                                                                                                         |                                                                           |          |           |                   |              |      |  |                              |      |       |                                                  |      |                                        |                                                                                                                                                                                                                                                                                                                                                                                                                                                                                                                                                                                                                                                                                                                                                                                                                                                                                                                                                                                                                                                                                                                                                                                                                                                                                                                                                                                                                                                                                                                                                                                                                                                                                                                                                                                                                                                                                                                                                                                                                                                                                                                                                                                   |      |                                        |     |                                                                              |      |                                                                                                                                                                                                                                                                                                                                                                                                                                                                                                                                                                                                                                                                                                                                                                                                                                                                                                                                                                                                                                                                                                                                                                                                                                                                                                                                                                                                                                                                                                      |              |                  |     |              |       |                       |                   |                                                                                                                    |           |              |                                                                                                                                                                                                                                                                                                                                                                                                                                                                                                                                                                                                                                                                                                                                                                                         |                                                                                                             |
| Why                                 | The program aims to support participants to take control of their own health and to support medical professionals to see patients in the context in which they live their lives and how this affects their health and wellbeing.                                                                                                                                                                                                                                                                                                                                                                                                                                                                                                                                                                                                                                                                                                                                                                                                                                                                                                                                                                                                                                                                                                                                                                                                                                                                     |                                                                                                                                                                                                                                                                                                                                                                                                                                                                                                                                                                                                                                                                                                                                                                                                                                                                                                                      |                   |   |      |                                                                              |                                                                                                                                                                                                                                                                                                                                                                                                                                |           |                   |                                                                                                                                                                                                                                                                                                                                                                                                  |                                                                                                                                                                                                                                  |              |                                            |                                                                                                                                                                                                                         |                                                                           |          |           |                   |              |      |  |                              |      |       |                                                  |      |                                        |                                                                                                                                                                                                                                                                                                                                                                                                                                                                                                                                                                                                                                                                                                                                                                                                                                                                                                                                                                                                                                                                                                                                                                                                                                                                                                                                                                                                                                                                                                                                                                                                                                                                                                                                                                                                                                                                                                                                                                                                                                                                                                                                                                                   |      |                                        |     |                                                                              |      |                                                                                                                                                                                                                                                                                                                                                                                                                                                                                                                                                                                                                                                                                                                                                                                                                                                                                                                                                                                                                                                                                                                                                                                                                                                                                                                                                                                                                                                                                                      |              |                  |     |              |       |                       |                   |                                                                                                                    |           |              |                                                                                                                                                                                                                                                                                                                                                                                                                                                                                                                                                                                                                                                                                                                                                                                         |                                                                                                             |
| What                                | Step 1: referral from a variety of sources                                                                                                                                                                                                                                                                                                                                                                                                                                                                                                                                                                                                                                                                                                                                                                                                                                                                                                                                                                                                                                                                                                                                                                                                                                                                                                                                                                                                                                                           |                                                                                                                                                                                                                                                                                                                                                                                                                                                                                                                                                                                                                                                                                                                                                                                                                                                                                                                      |                   |   |      |                                                                              |                                                                                                                                                                                                                                                                                                                                                                                                                                |           |                   |                                                                                                                                                                                                                                                                                                                                                                                                  |                                                                                                                                                                                                                                  |              |                                            |                                                                                                                                                                                                                         |                                                                           |          |           |                   |              |      |  |                              |      |       |                                                  |      |                                        |                                                                                                                                                                                                                                                                                                                                                                                                                                                                                                                                                                                                                                                                                                                                                                                                                                                                                                                                                                                                                                                                                                                                                                                                                                                                                                                                                                                                                                                                                                                                                                                                                                                                                                                                                                                                                                                                                                                                                                                                                                                                                                                                                                                   |      |                                        |     |                                                                              |      |                                                                                                                                                                                                                                                                                                                                                                                                                                                                                                                                                                                                                                                                                                                                                                                                                                                                                                                                                                                                                                                                                                                                                                                                                                                                                                                                                                                                                                                                                                      |              |                  |     |              |       |                       |                   |                                                                                                                    |           |              |                                                                                                                                                                                                                                                                                                                                                                                                                                                                                                                                                                                                                                                                                                                                                                                         |                                                                                                             |

|                    |                                                                                                                                                                                                                                                                                                                                                                                                                                                                                     |                                                                                                                                                                                                                                                                                                                                                                                                                                                                                                                                                                                                                                          |     |                 |     |        |              |              |           |          |      |                    |                 |      |                    |              |    |                   |                     |    |                                                                                   |                                                                                                                                                                                                                                                                                                                                                                                                                                                                                                                                                                                                                                                                                                                                                                                                                                                                                                                                                                             |              |                                                                                      |                                                                                                                                                                                                                                                                                                                                                                                                                                                                                                                                                                                                                                                                                                                                                                                                                                                                                                                                                                                  |                                                                                                                               |                        |                                                                                                                                                                                                                                                                                                                                                                                                                                                                                     |                                                                                             |                                     |                                                                                                                                                                                                                                                                                                                                                                                                                  |                                                                                                |                       |                                                                                                                                                                                                                               |                                            |       |   |                   |                  |           |                                |                                                                                                                                                                                                                                                                                                                                                                                                                                                              |                                                                                                                                                   |
|--------------------|-------------------------------------------------------------------------------------------------------------------------------------------------------------------------------------------------------------------------------------------------------------------------------------------------------------------------------------------------------------------------------------------------------------------------------------------------------------------------------------|------------------------------------------------------------------------------------------------------------------------------------------------------------------------------------------------------------------------------------------------------------------------------------------------------------------------------------------------------------------------------------------------------------------------------------------------------------------------------------------------------------------------------------------------------------------------------------------------------------------------------------------|-----|-----------------|-----|--------|--------------|--------------|-----------|----------|------|--------------------|-----------------|------|--------------------|--------------|----|-------------------|---------------------|----|-----------------------------------------------------------------------------------|-----------------------------------------------------------------------------------------------------------------------------------------------------------------------------------------------------------------------------------------------------------------------------------------------------------------------------------------------------------------------------------------------------------------------------------------------------------------------------------------------------------------------------------------------------------------------------------------------------------------------------------------------------------------------------------------------------------------------------------------------------------------------------------------------------------------------------------------------------------------------------------------------------------------------------------------------------------------------------|--------------|--------------------------------------------------------------------------------------|----------------------------------------------------------------------------------------------------------------------------------------------------------------------------------------------------------------------------------------------------------------------------------------------------------------------------------------------------------------------------------------------------------------------------------------------------------------------------------------------------------------------------------------------------------------------------------------------------------------------------------------------------------------------------------------------------------------------------------------------------------------------------------------------------------------------------------------------------------------------------------------------------------------------------------------------------------------------------------|-------------------------------------------------------------------------------------------------------------------------------|------------------------|-------------------------------------------------------------------------------------------------------------------------------------------------------------------------------------------------------------------------------------------------------------------------------------------------------------------------------------------------------------------------------------------------------------------------------------------------------------------------------------|---------------------------------------------------------------------------------------------|-------------------------------------|------------------------------------------------------------------------------------------------------------------------------------------------------------------------------------------------------------------------------------------------------------------------------------------------------------------------------------------------------------------------------------------------------------------|------------------------------------------------------------------------------------------------|-----------------------|-------------------------------------------------------------------------------------------------------------------------------------------------------------------------------------------------------------------------------|--------------------------------------------|-------|---|-------------------|------------------|-----------|--------------------------------|--------------------------------------------------------------------------------------------------------------------------------------------------------------------------------------------------------------------------------------------------------------------------------------------------------------------------------------------------------------------------------------------------------------------------------------------------------------|---------------------------------------------------------------------------------------------------------------------------------------------------|
|                    |                                                                                                                                                                                                                                                                                                                                                                                                                                                                                     | <table border="1"> <tr> <td>Age</td> <td>Age group 50+ %</td> <td>66</td> </tr> <tr> <td>Gender</td> <td>Female %</td> <td>75</td> </tr> <tr> <td>Ethnicity</td> <td>-</td> <td>-</td> </tr> <tr> <td>Living arrangement</td> <td>-</td> <td>-</td> </tr> <tr> <td>Employment status</td> <td>Unemployed %</td> <td>39</td> </tr> <tr> <td>Other</td> <td>Existing disability</td> <td>60</td> </tr> </table> <p>Population: Unclear</p>                                                                                                                                                                                                 | Age | Age group 50+ % | 66  | Gender | Female %     | 75           | Ethnicity | -        | -    | Living arrangement | -               | -    | Employment status  | Unemployed % | 39 | Other             | Existing disability | 60 | Liverpool, North West England)                                                    | <p>Step 2: wellbeing assessment to identify social issues impacting their health and wellbeing, and to identify strengths and assets, develop and implement a Personalised Wellbeing Plan to help people move forward</p> <p>Step 3: Community Navigation: signpost to additional support</p> <p>Step 4: Social Prescribing Activity access to over 400 different social prescribing activities</p> <p>Step 5: Continued Support: Once participants feel confident enough, they are supported into a variety of routeways including, volunteering, employment / self-employment, further training and education or alternative provision</p> <table border="1"> <tr> <td>Who provided</td> <td>Community Wellbeing Officers (CWO's)</td> </tr> <tr> <td>How</td> <td>Face-to-face</td> </tr> <tr> <td>Where</td> <td>-</td> </tr> <tr> <td>When and How Much</td> <td>-</td> </tr> <tr> <td>Tailoring</td> <td>Personalized</td> </tr> </table> <p>Intervention: Medium</p> | Who provided | Community Wellbeing Officers (CWO's)                                                 | How                                                                                                                                                                                                                                                                                                                                                                                                                                                                                                                                                                                                                                                                                                                                                                                                                                                                                                                                                                              | Face-to-face                                                                                                                  | Where                  | -                                                                                                                                                                                                                                                                                                                                                                                                                                                                                   | When and How Much                                                                           | -                                   | Tailoring                                                                                                                                                                                                                                                                                                                                                                                                        | Personalized                                                                                   |                       | <p>Knowsley Council, Halton Borough Council, St. Helens Clinical Commissioning Group, Halton Clinical Commissioning Group, Knowsley Clinical Commissioning Group, Community Fund</p> <p>Declarations of interest: Unknown</p> |                                            |       |   |                   |                  |           |                                |                                                                                                                                                                                                                                                                                                                                                                                                                                                              |                                                                                                                                                   |
| Age                | Age group 50+ %                                                                                                                                                                                                                                                                                                                                                                                                                                                                     | 66                                                                                                                                                                                                                                                                                                                                                                                                                                                                                                                                                                                                                                       |     |                 |     |        |              |              |           |          |      |                    |                 |      |                    |              |    |                   |                     |    |                                                                                   |                                                                                                                                                                                                                                                                                                                                                                                                                                                                                                                                                                                                                                                                                                                                                                                                                                                                                                                                                                             |              |                                                                                      |                                                                                                                                                                                                                                                                                                                                                                                                                                                                                                                                                                                                                                                                                                                                                                                                                                                                                                                                                                                  |                                                                                                                               |                        |                                                                                                                                                                                                                                                                                                                                                                                                                                                                                     |                                                                                             |                                     |                                                                                                                                                                                                                                                                                                                                                                                                                  |                                                                                                |                       |                                                                                                                                                                                                                               |                                            |       |   |                   |                  |           |                                |                                                                                                                                                                                                                                                                                                                                                                                                                                                              |                                                                                                                                                   |
| Gender             | Female %                                                                                                                                                                                                                                                                                                                                                                                                                                                                            | 75                                                                                                                                                                                                                                                                                                                                                                                                                                                                                                                                                                                                                                       |     |                 |     |        |              |              |           |          |      |                    |                 |      |                    |              |    |                   |                     |    |                                                                                   |                                                                                                                                                                                                                                                                                                                                                                                                                                                                                                                                                                                                                                                                                                                                                                                                                                                                                                                                                                             |              |                                                                                      |                                                                                                                                                                                                                                                                                                                                                                                                                                                                                                                                                                                                                                                                                                                                                                                                                                                                                                                                                                                  |                                                                                                                               |                        |                                                                                                                                                                                                                                                                                                                                                                                                                                                                                     |                                                                                             |                                     |                                                                                                                                                                                                                                                                                                                                                                                                                  |                                                                                                |                       |                                                                                                                                                                                                                               |                                            |       |   |                   |                  |           |                                |                                                                                                                                                                                                                                                                                                                                                                                                                                                              |                                                                                                                                                   |
| Ethnicity          | -                                                                                                                                                                                                                                                                                                                                                                                                                                                                                   | -                                                                                                                                                                                                                                                                                                                                                                                                                                                                                                                                                                                                                                        |     |                 |     |        |              |              |           |          |      |                    |                 |      |                    |              |    |                   |                     |    |                                                                                   |                                                                                                                                                                                                                                                                                                                                                                                                                                                                                                                                                                                                                                                                                                                                                                                                                                                                                                                                                                             |              |                                                                                      |                                                                                                                                                                                                                                                                                                                                                                                                                                                                                                                                                                                                                                                                                                                                                                                                                                                                                                                                                                                  |                                                                                                                               |                        |                                                                                                                                                                                                                                                                                                                                                                                                                                                                                     |                                                                                             |                                     |                                                                                                                                                                                                                                                                                                                                                                                                                  |                                                                                                |                       |                                                                                                                                                                                                                               |                                            |       |   |                   |                  |           |                                |                                                                                                                                                                                                                                                                                                                                                                                                                                                              |                                                                                                                                                   |
| Living arrangement | -                                                                                                                                                                                                                                                                                                                                                                                                                                                                                   | -                                                                                                                                                                                                                                                                                                                                                                                                                                                                                                                                                                                                                                        |     |                 |     |        |              |              |           |          |      |                    |                 |      |                    |              |    |                   |                     |    |                                                                                   |                                                                                                                                                                                                                                                                                                                                                                                                                                                                                                                                                                                                                                                                                                                                                                                                                                                                                                                                                                             |              |                                                                                      |                                                                                                                                                                                                                                                                                                                                                                                                                                                                                                                                                                                                                                                                                                                                                                                                                                                                                                                                                                                  |                                                                                                                               |                        |                                                                                                                                                                                                                                                                                                                                                                                                                                                                                     |                                                                                             |                                     |                                                                                                                                                                                                                                                                                                                                                                                                                  |                                                                                                |                       |                                                                                                                                                                                                                               |                                            |       |   |                   |                  |           |                                |                                                                                                                                                                                                                                                                                                                                                                                                                                                              |                                                                                                                                                   |
| Employment status  | Unemployed %                                                                                                                                                                                                                                                                                                                                                                                                                                                                        | 39                                                                                                                                                                                                                                                                                                                                                                                                                                                                                                                                                                                                                                       |     |                 |     |        |              |              |           |          |      |                    |                 |      |                    |              |    |                   |                     |    |                                                                                   |                                                                                                                                                                                                                                                                                                                                                                                                                                                                                                                                                                                                                                                                                                                                                                                                                                                                                                                                                                             |              |                                                                                      |                                                                                                                                                                                                                                                                                                                                                                                                                                                                                                                                                                                                                                                                                                                                                                                                                                                                                                                                                                                  |                                                                                                                               |                        |                                                                                                                                                                                                                                                                                                                                                                                                                                                                                     |                                                                                             |                                     |                                                                                                                                                                                                                                                                                                                                                                                                                  |                                                                                                |                       |                                                                                                                                                                                                                               |                                            |       |   |                   |                  |           |                                |                                                                                                                                                                                                                                                                                                                                                                                                                                                              |                                                                                                                                                   |
| Other              | Existing disability                                                                                                                                                                                                                                                                                                                                                                                                                                                                 | 60                                                                                                                                                                                                                                                                                                                                                                                                                                                                                                                                                                                                                                       |     |                 |     |        |              |              |           |          |      |                    |                 |      |                    |              |    |                   |                     |    |                                                                                   |                                                                                                                                                                                                                                                                                                                                                                                                                                                                                                                                                                                                                                                                                                                                                                                                                                                                                                                                                                             |              |                                                                                      |                                                                                                                                                                                                                                                                                                                                                                                                                                                                                                                                                                                                                                                                                                                                                                                                                                                                                                                                                                                  |                                                                                                                               |                        |                                                                                                                                                                                                                                                                                                                                                                                                                                                                                     |                                                                                             |                                     |                                                                                                                                                                                                                                                                                                                                                                                                                  |                                                                                                |                       |                                                                                                                                                                                                                               |                                            |       |   |                   |                  |           |                                |                                                                                                                                                                                                                                                                                                                                                                                                                                                              |                                                                                                                                                   |
| Who provided       | Community Wellbeing Officers (CWO's)                                                                                                                                                                                                                                                                                                                                                                                                                                                |                                                                                                                                                                                                                                                                                                                                                                                                                                                                                                                                                                                                                                          |     |                 |     |        |              |              |           |          |      |                    |                 |      |                    |              |    |                   |                     |    |                                                                                   |                                                                                                                                                                                                                                                                                                                                                                                                                                                                                                                                                                                                                                                                                                                                                                                                                                                                                                                                                                             |              |                                                                                      |                                                                                                                                                                                                                                                                                                                                                                                                                                                                                                                                                                                                                                                                                                                                                                                                                                                                                                                                                                                  |                                                                                                                               |                        |                                                                                                                                                                                                                                                                                                                                                                                                                                                                                     |                                                                                             |                                     |                                                                                                                                                                                                                                                                                                                                                                                                                  |                                                                                                |                       |                                                                                                                                                                                                                               |                                            |       |   |                   |                  |           |                                |                                                                                                                                                                                                                                                                                                                                                                                                                                                              |                                                                                                                                                   |
| How                | Face-to-face                                                                                                                                                                                                                                                                                                                                                                                                                                                                        |                                                                                                                                                                                                                                                                                                                                                                                                                                                                                                                                                                                                                                          |     |                 |     |        |              |              |           |          |      |                    |                 |      |                    |              |    |                   |                     |    |                                                                                   |                                                                                                                                                                                                                                                                                                                                                                                                                                                                                                                                                                                                                                                                                                                                                                                                                                                                                                                                                                             |              |                                                                                      |                                                                                                                                                                                                                                                                                                                                                                                                                                                                                                                                                                                                                                                                                                                                                                                                                                                                                                                                                                                  |                                                                                                                               |                        |                                                                                                                                                                                                                                                                                                                                                                                                                                                                                     |                                                                                             |                                     |                                                                                                                                                                                                                                                                                                                                                                                                                  |                                                                                                |                       |                                                                                                                                                                                                                               |                                            |       |   |                   |                  |           |                                |                                                                                                                                                                                                                                                                                                                                                                                                                                                              |                                                                                                                                                   |
| Where              | -                                                                                                                                                                                                                                                                                                                                                                                                                                                                                   |                                                                                                                                                                                                                                                                                                                                                                                                                                                                                                                                                                                                                                          |     |                 |     |        |              |              |           |          |      |                    |                 |      |                    |              |    |                   |                     |    |                                                                                   |                                                                                                                                                                                                                                                                                                                                                                                                                                                                                                                                                                                                                                                                                                                                                                                                                                                                                                                                                                             |              |                                                                                      |                                                                                                                                                                                                                                                                                                                                                                                                                                                                                                                                                                                                                                                                                                                                                                                                                                                                                                                                                                                  |                                                                                                                               |                        |                                                                                                                                                                                                                                                                                                                                                                                                                                                                                     |                                                                                             |                                     |                                                                                                                                                                                                                                                                                                                                                                                                                  |                                                                                                |                       |                                                                                                                                                                                                                               |                                            |       |   |                   |                  |           |                                |                                                                                                                                                                                                                                                                                                                                                                                                                                                              |                                                                                                                                                   |
| When and How Much  | -                                                                                                                                                                                                                                                                                                                                                                                                                                                                                   |                                                                                                                                                                                                                                                                                                                                                                                                                                                                                                                                                                                                                                          |     |                 |     |        |              |              |           |          |      |                    |                 |      |                    |              |    |                   |                     |    |                                                                                   |                                                                                                                                                                                                                                                                                                                                                                                                                                                                                                                                                                                                                                                                                                                                                                                                                                                                                                                                                                             |              |                                                                                      |                                                                                                                                                                                                                                                                                                                                                                                                                                                                                                                                                                                                                                                                                                                                                                                                                                                                                                                                                                                  |                                                                                                                               |                        |                                                                                                                                                                                                                                                                                                                                                                                                                                                                                     |                                                                                             |                                     |                                                                                                                                                                                                                                                                                                                                                                                                                  |                                                                                                |                       |                                                                                                                                                                                                                               |                                            |       |   |                   |                  |           |                                |                                                                                                                                                                                                                                                                                                                                                                                                                                                              |                                                                                                                                                   |
| Tailoring          | Personalized                                                                                                                                                                                                                                                                                                                                                                                                                                                                        |                                                                                                                                                                                                                                                                                                                                                                                                                                                                                                                                                                                                                                          |     |                 |     |        |              |              |           |          |      |                    |                 |      |                    |              |    |                   |                     |    |                                                                                   |                                                                                                                                                                                                                                                                                                                                                                                                                                                                                                                                                                                                                                                                                                                                                                                                                                                                                                                                                                             |              |                                                                                      |                                                                                                                                                                                                                                                                                                                                                                                                                                                                                                                                                                                                                                                                                                                                                                                                                                                                                                                                                                                  |                                                                                                                               |                        |                                                                                                                                                                                                                                                                                                                                                                                                                                                                                     |                                                                                             |                                     |                                                                                                                                                                                                                                                                                                                                                                                                                  |                                                                                                |                       |                                                                                                                                                                                                                               |                                            |       |   |                   |                  |           |                                |                                                                                                                                                                                                                                                                                                                                                                                                                                                              |                                                                                                                                                   |
| Woodall 2018 (90)  | <p>Uncontrolled before-and-after study, mixed methods</p> <p>Study length: 18 months</p>                                                                                                                                                                                                                                                                                                                                                                                            | <p><b>Inclusion criteria:</b><br/>14 years and over, registered with a GP surgery</p> <p><b>Exclusion criteria:</b> -</p> <p>Baseline characteristics:</p> <table border="1"> <tr> <td>N</td> <td></td> <td>436</td> </tr> <tr> <td>Age</td> <td>Mean (SD)</td> <td>53.1 (18.02)</td> </tr> <tr> <td>Gender</td> <td>Female %</td> <td>63.9</td> </tr> <tr> <td>Ethnicity</td> <td>White British %</td> <td>86.9</td> </tr> <tr> <td>Living arrangement</td> <td>-</td> <td>-</td> </tr> <tr> <td>Employment status</td> <td>-</td> <td>-</td> </tr> <tr> <td>Other</td> <td>-</td> <td>-</td> </tr> </table> <p>Population: General</p> | N   |                 | 436 | Age    | Mean (SD)    | 53.1 (18.02) | Gender    | Female % | 63.9 | Ethnicity          | White British % | 86.9 | Living arrangement | -            | -  | Employment status | -                   | -  | Other                                                                             | -                                                                                                                                                                                                                                                                                                                                                                                                                                                                                                                                                                                                                                                                                                                                                                                                                                                                                                                                                                           | -            | <p>Primary Care</p> <p>Country:<br/>UK (Leeds, West Yorkshire, Northern England)</p> | <table border="1"> <tr> <td>Name</td> <td>Wellbeing Coordinators</td> </tr> <tr> <td>Why</td> <td>To manage patients presenting conditions that can be addressed without medical intervention</td> </tr> <tr> <td>What</td> <td>Individuals can self-refer into the social prescribing service or GP's, health, social care and other relevant professionals can make a referral. Service users social support needs are explored and Wellbeing coordinators provide them with information, support and guidance in relation to accessing local community activity to improve their health and wellbeing.</td> </tr> <tr> <td>Who provided</td> <td>Wellbeing Coordinator</td> </tr> <tr> <td>How</td> <td>Via telephone, face-to-face (if necessary)</td> </tr> <tr> <td>Where</td> <td>-</td> </tr> <tr> <td>When and How Much</td> <td>Up to 6 sessions</td> </tr> <tr> <td>Tailoring</td> <td>Personalized, flexible program</td> </tr> </table> <p>Intervention: Medium</p> | Name                                                                                                                          | Wellbeing Coordinators | Why                                                                                                                                                                                                                                                                                                                                                                                                                                                                                 | To manage patients presenting conditions that can be addressed without medical intervention | What                                | Individuals can self-refer into the social prescribing service or GP's, health, social care and other relevant professionals can make a referral. Service users social support needs are explored and Wellbeing coordinators provide them with information, support and guidance in relation to accessing local community activity to improve their health and wellbeing.                                        | Who provided                                                                                   | Wellbeing Coordinator | How                                                                                                                                                                                                                           | Via telephone, face-to-face (if necessary) | Where | - | When and How Much | Up to 6 sessions | Tailoring | Personalized, flexible program | <p>Patient outcomes at Baseline and 6-16 weeks follow-up via questionnaire. Subgroup analyses by age and gender:</p> <ul style="list-style-type: none"> <li>- Warwick Edinburgh Mental Wellbeing Scale</li> <li>- EQ-5D</li> <li>- Campaign to End Loneliness Tool</li> </ul> <p>Process of care measures at Baseline and 6-16 weeks follow-up via questionnaire. Subgroup analyses by age:</p> <ul style="list-style-type: none"> <li>- GP usage</li> </ul> | <p>Peer-Review: Yes</p> <p>Funding source: Leeds South &amp; East Clinical Commissioning Group</p> <p>Declarations of interest: None declared</p> |
| N                  |                                                                                                                                                                                                                                                                                                                                                                                                                                                                                     | 436                                                                                                                                                                                                                                                                                                                                                                                                                                                                                                                                                                                                                                      |     |                 |     |        |              |              |           |          |      |                    |                 |      |                    |              |    |                   |                     |    |                                                                                   |                                                                                                                                                                                                                                                                                                                                                                                                                                                                                                                                                                                                                                                                                                                                                                                                                                                                                                                                                                             |              |                                                                                      |                                                                                                                                                                                                                                                                                                                                                                                                                                                                                                                                                                                                                                                                                                                                                                                                                                                                                                                                                                                  |                                                                                                                               |                        |                                                                                                                                                                                                                                                                                                                                                                                                                                                                                     |                                                                                             |                                     |                                                                                                                                                                                                                                                                                                                                                                                                                  |                                                                                                |                       |                                                                                                                                                                                                                               |                                            |       |   |                   |                  |           |                                |                                                                                                                                                                                                                                                                                                                                                                                                                                                              |                                                                                                                                                   |
| Age                | Mean (SD)                                                                                                                                                                                                                                                                                                                                                                                                                                                                           | 53.1 (18.02)                                                                                                                                                                                                                                                                                                                                                                                                                                                                                                                                                                                                                             |     |                 |     |        |              |              |           |          |      |                    |                 |      |                    |              |    |                   |                     |    |                                                                                   |                                                                                                                                                                                                                                                                                                                                                                                                                                                                                                                                                                                                                                                                                                                                                                                                                                                                                                                                                                             |              |                                                                                      |                                                                                                                                                                                                                                                                                                                                                                                                                                                                                                                                                                                                                                                                                                                                                                                                                                                                                                                                                                                  |                                                                                                                               |                        |                                                                                                                                                                                                                                                                                                                                                                                                                                                                                     |                                                                                             |                                     |                                                                                                                                                                                                                                                                                                                                                                                                                  |                                                                                                |                       |                                                                                                                                                                                                                               |                                            |       |   |                   |                  |           |                                |                                                                                                                                                                                                                                                                                                                                                                                                                                                              |                                                                                                                                                   |
| Gender             | Female %                                                                                                                                                                                                                                                                                                                                                                                                                                                                            | 63.9                                                                                                                                                                                                                                                                                                                                                                                                                                                                                                                                                                                                                                     |     |                 |     |        |              |              |           |          |      |                    |                 |      |                    |              |    |                   |                     |    |                                                                                   |                                                                                                                                                                                                                                                                                                                                                                                                                                                                                                                                                                                                                                                                                                                                                                                                                                                                                                                                                                             |              |                                                                                      |                                                                                                                                                                                                                                                                                                                                                                                                                                                                                                                                                                                                                                                                                                                                                                                                                                                                                                                                                                                  |                                                                                                                               |                        |                                                                                                                                                                                                                                                                                                                                                                                                                                                                                     |                                                                                             |                                     |                                                                                                                                                                                                                                                                                                                                                                                                                  |                                                                                                |                       |                                                                                                                                                                                                                               |                                            |       |   |                   |                  |           |                                |                                                                                                                                                                                                                                                                                                                                                                                                                                                              |                                                                                                                                                   |
| Ethnicity          | White British %                                                                                                                                                                                                                                                                                                                                                                                                                                                                     | 86.9                                                                                                                                                                                                                                                                                                                                                                                                                                                                                                                                                                                                                                     |     |                 |     |        |              |              |           |          |      |                    |                 |      |                    |              |    |                   |                     |    |                                                                                   |                                                                                                                                                                                                                                                                                                                                                                                                                                                                                                                                                                                                                                                                                                                                                                                                                                                                                                                                                                             |              |                                                                                      |                                                                                                                                                                                                                                                                                                                                                                                                                                                                                                                                                                                                                                                                                                                                                                                                                                                                                                                                                                                  |                                                                                                                               |                        |                                                                                                                                                                                                                                                                                                                                                                                                                                                                                     |                                                                                             |                                     |                                                                                                                                                                                                                                                                                                                                                                                                                  |                                                                                                |                       |                                                                                                                                                                                                                               |                                            |       |   |                   |                  |           |                                |                                                                                                                                                                                                                                                                                                                                                                                                                                                              |                                                                                                                                                   |
| Living arrangement | -                                                                                                                                                                                                                                                                                                                                                                                                                                                                                   | -                                                                                                                                                                                                                                                                                                                                                                                                                                                                                                                                                                                                                                        |     |                 |     |        |              |              |           |          |      |                    |                 |      |                    |              |    |                   |                     |    |                                                                                   |                                                                                                                                                                                                                                                                                                                                                                                                                                                                                                                                                                                                                                                                                                                                                                                                                                                                                                                                                                             |              |                                                                                      |                                                                                                                                                                                                                                                                                                                                                                                                                                                                                                                                                                                                                                                                                                                                                                                                                                                                                                                                                                                  |                                                                                                                               |                        |                                                                                                                                                                                                                                                                                                                                                                                                                                                                                     |                                                                                             |                                     |                                                                                                                                                                                                                                                                                                                                                                                                                  |                                                                                                |                       |                                                                                                                                                                                                                               |                                            |       |   |                   |                  |           |                                |                                                                                                                                                                                                                                                                                                                                                                                                                                                              |                                                                                                                                                   |
| Employment status  | -                                                                                                                                                                                                                                                                                                                                                                                                                                                                                   | -                                                                                                                                                                                                                                                                                                                                                                                                                                                                                                                                                                                                                                        |     |                 |     |        |              |              |           |          |      |                    |                 |      |                    |              |    |                   |                     |    |                                                                                   |                                                                                                                                                                                                                                                                                                                                                                                                                                                                                                                                                                                                                                                                                                                                                                                                                                                                                                                                                                             |              |                                                                                      |                                                                                                                                                                                                                                                                                                                                                                                                                                                                                                                                                                                                                                                                                                                                                                                                                                                                                                                                                                                  |                                                                                                                               |                        |                                                                                                                                                                                                                                                                                                                                                                                                                                                                                     |                                                                                             |                                     |                                                                                                                                                                                                                                                                                                                                                                                                                  |                                                                                                |                       |                                                                                                                                                                                                                               |                                            |       |   |                   |                  |           |                                |                                                                                                                                                                                                                                                                                                                                                                                                                                                              |                                                                                                                                                   |
| Other              | -                                                                                                                                                                                                                                                                                                                                                                                                                                                                                   | -                                                                                                                                                                                                                                                                                                                                                                                                                                                                                                                                                                                                                                        |     |                 |     |        |              |              |           |          |      |                    |                 |      |                    |              |    |                   |                     |    |                                                                                   |                                                                                                                                                                                                                                                                                                                                                                                                                                                                                                                                                                                                                                                                                                                                                                                                                                                                                                                                                                             |              |                                                                                      |                                                                                                                                                                                                                                                                                                                                                                                                                                                                                                                                                                                                                                                                                                                                                                                                                                                                                                                                                                                  |                                                                                                                               |                        |                                                                                                                                                                                                                                                                                                                                                                                                                                                                                     |                                                                                             |                                     |                                                                                                                                                                                                                                                                                                                                                                                                                  |                                                                                                |                       |                                                                                                                                                                                                                               |                                            |       |   |                   |                  |           |                                |                                                                                                                                                                                                                                                                                                                                                                                                                                                              |                                                                                                                                                   |
| Name               | Wellbeing Coordinators                                                                                                                                                                                                                                                                                                                                                                                                                                                              |                                                                                                                                                                                                                                                                                                                                                                                                                                                                                                                                                                                                                                          |     |                 |     |        |              |              |           |          |      |                    |                 |      |                    |              |    |                   |                     |    |                                                                                   |                                                                                                                                                                                                                                                                                                                                                                                                                                                                                                                                                                                                                                                                                                                                                                                                                                                                                                                                                                             |              |                                                                                      |                                                                                                                                                                                                                                                                                                                                                                                                                                                                                                                                                                                                                                                                                                                                                                                                                                                                                                                                                                                  |                                                                                                                               |                        |                                                                                                                                                                                                                                                                                                                                                                                                                                                                                     |                                                                                             |                                     |                                                                                                                                                                                                                                                                                                                                                                                                                  |                                                                                                |                       |                                                                                                                                                                                                                               |                                            |       |   |                   |                  |           |                                |                                                                                                                                                                                                                                                                                                                                                                                                                                                              |                                                                                                                                                   |
| Why                | To manage patients presenting conditions that can be addressed without medical intervention                                                                                                                                                                                                                                                                                                                                                                                         |                                                                                                                                                                                                                                                                                                                                                                                                                                                                                                                                                                                                                                          |     |                 |     |        |              |              |           |          |      |                    |                 |      |                    |              |    |                   |                     |    |                                                                                   |                                                                                                                                                                                                                                                                                                                                                                                                                                                                                                                                                                                                                                                                                                                                                                                                                                                                                                                                                                             |              |                                                                                      |                                                                                                                                                                                                                                                                                                                                                                                                                                                                                                                                                                                                                                                                                                                                                                                                                                                                                                                                                                                  |                                                                                                                               |                        |                                                                                                                                                                                                                                                                                                                                                                                                                                                                                     |                                                                                             |                                     |                                                                                                                                                                                                                                                                                                                                                                                                                  |                                                                                                |                       |                                                                                                                                                                                                                               |                                            |       |   |                   |                  |           |                                |                                                                                                                                                                                                                                                                                                                                                                                                                                                              |                                                                                                                                                   |
| What               | Individuals can self-refer into the social prescribing service or GP's, health, social care and other relevant professionals can make a referral. Service users social support needs are explored and Wellbeing coordinators provide them with information, support and guidance in relation to accessing local community activity to improve their health and wellbeing.                                                                                                           |                                                                                                                                                                                                                                                                                                                                                                                                                                                                                                                                                                                                                                          |     |                 |     |        |              |              |           |          |      |                    |                 |      |                    |              |    |                   |                     |    |                                                                                   |                                                                                                                                                                                                                                                                                                                                                                                                                                                                                                                                                                                                                                                                                                                                                                                                                                                                                                                                                                             |              |                                                                                      |                                                                                                                                                                                                                                                                                                                                                                                                                                                                                                                                                                                                                                                                                                                                                                                                                                                                                                                                                                                  |                                                                                                                               |                        |                                                                                                                                                                                                                                                                                                                                                                                                                                                                                     |                                                                                             |                                     |                                                                                                                                                                                                                                                                                                                                                                                                                  |                                                                                                |                       |                                                                                                                                                                                                                               |                                            |       |   |                   |                  |           |                                |                                                                                                                                                                                                                                                                                                                                                                                                                                                              |                                                                                                                                                   |
| Who provided       | Wellbeing Coordinator                                                                                                                                                                                                                                                                                                                                                                                                                                                               |                                                                                                                                                                                                                                                                                                                                                                                                                                                                                                                                                                                                                                          |     |                 |     |        |              |              |           |          |      |                    |                 |      |                    |              |    |                   |                     |    |                                                                                   |                                                                                                                                                                                                                                                                                                                                                                                                                                                                                                                                                                                                                                                                                                                                                                                                                                                                                                                                                                             |              |                                                                                      |                                                                                                                                                                                                                                                                                                                                                                                                                                                                                                                                                                                                                                                                                                                                                                                                                                                                                                                                                                                  |                                                                                                                               |                        |                                                                                                                                                                                                                                                                                                                                                                                                                                                                                     |                                                                                             |                                     |                                                                                                                                                                                                                                                                                                                                                                                                                  |                                                                                                |                       |                                                                                                                                                                                                                               |                                            |       |   |                   |                  |           |                                |                                                                                                                                                                                                                                                                                                                                                                                                                                                              |                                                                                                                                                   |
| How                | Via telephone, face-to-face (if necessary)                                                                                                                                                                                                                                                                                                                                                                                                                                          |                                                                                                                                                                                                                                                                                                                                                                                                                                                                                                                                                                                                                                          |     |                 |     |        |              |              |           |          |      |                    |                 |      |                    |              |    |                   |                     |    |                                                                                   |                                                                                                                                                                                                                                                                                                                                                                                                                                                                                                                                                                                                                                                                                                                                                                                                                                                                                                                                                                             |              |                                                                                      |                                                                                                                                                                                                                                                                                                                                                                                                                                                                                                                                                                                                                                                                                                                                                                                                                                                                                                                                                                                  |                                                                                                                               |                        |                                                                                                                                                                                                                                                                                                                                                                                                                                                                                     |                                                                                             |                                     |                                                                                                                                                                                                                                                                                                                                                                                                                  |                                                                                                |                       |                                                                                                                                                                                                                               |                                            |       |   |                   |                  |           |                                |                                                                                                                                                                                                                                                                                                                                                                                                                                                              |                                                                                                                                                   |
| Where              | -                                                                                                                                                                                                                                                                                                                                                                                                                                                                                   |                                                                                                                                                                                                                                                                                                                                                                                                                                                                                                                                                                                                                                          |     |                 |     |        |              |              |           |          |      |                    |                 |      |                    |              |    |                   |                     |    |                                                                                   |                                                                                                                                                                                                                                                                                                                                                                                                                                                                                                                                                                                                                                                                                                                                                                                                                                                                                                                                                                             |              |                                                                                      |                                                                                                                                                                                                                                                                                                                                                                                                                                                                                                                                                                                                                                                                                                                                                                                                                                                                                                                                                                                  |                                                                                                                               |                        |                                                                                                                                                                                                                                                                                                                                                                                                                                                                                     |                                                                                             |                                     |                                                                                                                                                                                                                                                                                                                                                                                                                  |                                                                                                |                       |                                                                                                                                                                                                                               |                                            |       |   |                   |                  |           |                                |                                                                                                                                                                                                                                                                                                                                                                                                                                                              |                                                                                                                                                   |
| When and How Much  | Up to 6 sessions                                                                                                                                                                                                                                                                                                                                                                                                                                                                    |                                                                                                                                                                                                                                                                                                                                                                                                                                                                                                                                                                                                                                          |     |                 |     |        |              |              |           |          |      |                    |                 |      |                    |              |    |                   |                     |    |                                                                                   |                                                                                                                                                                                                                                                                                                                                                                                                                                                                                                                                                                                                                                                                                                                                                                                                                                                                                                                                                                             |              |                                                                                      |                                                                                                                                                                                                                                                                                                                                                                                                                                                                                                                                                                                                                                                                                                                                                                                                                                                                                                                                                                                  |                                                                                                                               |                        |                                                                                                                                                                                                                                                                                                                                                                                                                                                                                     |                                                                                             |                                     |                                                                                                                                                                                                                                                                                                                                                                                                                  |                                                                                                |                       |                                                                                                                                                                                                                               |                                            |       |   |                   |                  |           |                                |                                                                                                                                                                                                                                                                                                                                                                                                                                                              |                                                                                                                                                   |
| Tailoring          | Personalized, flexible program                                                                                                                                                                                                                                                                                                                                                                                                                                                      |                                                                                                                                                                                                                                                                                                                                                                                                                                                                                                                                                                                                                                          |     |                 |     |        |              |              |           |          |      |                    |                 |      |                    |              |    |                   |                     |    |                                                                                   |                                                                                                                                                                                                                                                                                                                                                                                                                                                                                                                                                                                                                                                                                                                                                                                                                                                                                                                                                                             |              |                                                                                      |                                                                                                                                                                                                                                                                                                                                                                                                                                                                                                                                                                                                                                                                                                                                                                                                                                                                                                                                                                                  |                                                                                                                               |                        |                                                                                                                                                                                                                                                                                                                                                                                                                                                                                     |                                                                                             |                                     |                                                                                                                                                                                                                                                                                                                                                                                                                  |                                                                                                |                       |                                                                                                                                                                                                                               |                                            |       |   |                   |                  |           |                                |                                                                                                                                                                                                                                                                                                                                                                                                                                                              |                                                                                                                                                   |
| York CVS 2019 (91) | <p>Uncontrolled before-and-after study, mixed-methods</p> <p>Study length: 12 months</p>                                                                                                                                                                                                                                                                                                                                                                                            | <p><b>Inclusion criteria:</b> -</p> <p><b>Exclusion criteria:</b> -</p> <p>Baseline characteristics:</p> <table border="1"> <tr> <td>N</td> <td></td> <td>71</td> </tr> <tr> <td>Age</td> <td>Mean (Range)</td> <td>54 (24-90)</td> </tr> <tr> <td>Gender</td> <td>Female %</td> <td>69</td> </tr> <tr> <td>Ethnicity</td> <td>-</td> <td>-</td> </tr> <tr> <td>Living arrangement</td> <td>-</td> <td>-</td> </tr> <tr> <td>Employment status</td> <td>-</td> <td>-</td> </tr> </table>                                                                                                                                                 | N   |                 | 71  | Age    | Mean (Range) | 54 (24-90)   | Gender    | Female % | 69   | Ethnicity          | -               | -    | Living arrangement | -            | -  | Employment status | -                   | -  | <p>Primary Care, GP surgeries</p> <p>Country:<br/>UK (York, Northern England)</p> | <table border="1"> <tr> <td>Name</td> <td>Ways to Wellbeing, York</td> </tr> <tr> <td>Why</td> <td>It tackles increasing pressure and stretched resources of GPs by connecting people with voluntary and community organisations</td> </tr> <tr> <td>What</td> <td>Identify potential networks of support, work with individuals to achieve the outcomes that are important to them, identify and challenge barriers to improving wellbeing. Help individuals to make simple changes to their lifestyle and their home environment, to improve independence and quality of life, help identify their strengths and develop new ways of doing things.<br/><br/>Offer a volunteering pathway to facilitate embedding of new skills and confidence building</td> </tr> <tr> <td>Who provided</td> <td>Ways to Wellbeing (W2W) coordinator</td> </tr> </table>                                                                                                                  | Name         | Ways to Wellbeing, York                                                              | Why                                                                                                                                                                                                                                                                                                                                                                                                                                                                                                                                                                                                                                                                                                                                                                                                                                                                                                                                                                              | It tackles increasing pressure and stretched resources of GPs by connecting people with voluntary and community organisations | What                   | Identify potential networks of support, work with individuals to achieve the outcomes that are important to them, identify and challenge barriers to improving wellbeing. Help individuals to make simple changes to their lifestyle and their home environment, to improve independence and quality of life, help identify their strengths and develop new ways of doing things.<br><br>Offer a volunteering pathway to facilitate embedding of new skills and confidence building | Who provided                                                                                | Ways to Wellbeing (W2W) coordinator | <p>Patient outcomes at Baseline and 3 months follow-up via questionnaire:</p> <ul style="list-style-type: none"> <li>- Short Warwick Edinburgh Mental Wellbeing Scale</li> <li>- Confidence question (from the original Warwick Edinburgh Mental Wellbeing Scale)</li> <li>- Campaign to End Loneliness Tool, Q2</li> <li>- Number of people engaging in physical activity as a result of the service</li> </ul> | <p>Peer-Review: No</p> <p>Funding source: Unknown</p> <p>Declarations of interest: Unknown</p> |                       |                                                                                                                                                                                                                               |                                            |       |   |                   |                  |           |                                |                                                                                                                                                                                                                                                                                                                                                                                                                                                              |                                                                                                                                                   |
| N                  |                                                                                                                                                                                                                                                                                                                                                                                                                                                                                     | 71                                                                                                                                                                                                                                                                                                                                                                                                                                                                                                                                                                                                                                       |     |                 |     |        |              |              |           |          |      |                    |                 |      |                    |              |    |                   |                     |    |                                                                                   |                                                                                                                                                                                                                                                                                                                                                                                                                                                                                                                                                                                                                                                                                                                                                                                                                                                                                                                                                                             |              |                                                                                      |                                                                                                                                                                                                                                                                                                                                                                                                                                                                                                                                                                                                                                                                                                                                                                                                                                                                                                                                                                                  |                                                                                                                               |                        |                                                                                                                                                                                                                                                                                                                                                                                                                                                                                     |                                                                                             |                                     |                                                                                                                                                                                                                                                                                                                                                                                                                  |                                                                                                |                       |                                                                                                                                                                                                                               |                                            |       |   |                   |                  |           |                                |                                                                                                                                                                                                                                                                                                                                                                                                                                                              |                                                                                                                                                   |
| Age                | Mean (Range)                                                                                                                                                                                                                                                                                                                                                                                                                                                                        | 54 (24-90)                                                                                                                                                                                                                                                                                                                                                                                                                                                                                                                                                                                                                               |     |                 |     |        |              |              |           |          |      |                    |                 |      |                    |              |    |                   |                     |    |                                                                                   |                                                                                                                                                                                                                                                                                                                                                                                                                                                                                                                                                                                                                                                                                                                                                                                                                                                                                                                                                                             |              |                                                                                      |                                                                                                                                                                                                                                                                                                                                                                                                                                                                                                                                                                                                                                                                                                                                                                                                                                                                                                                                                                                  |                                                                                                                               |                        |                                                                                                                                                                                                                                                                                                                                                                                                                                                                                     |                                                                                             |                                     |                                                                                                                                                                                                                                                                                                                                                                                                                  |                                                                                                |                       |                                                                                                                                                                                                                               |                                            |       |   |                   |                  |           |                                |                                                                                                                                                                                                                                                                                                                                                                                                                                                              |                                                                                                                                                   |
| Gender             | Female %                                                                                                                                                                                                                                                                                                                                                                                                                                                                            | 69                                                                                                                                                                                                                                                                                                                                                                                                                                                                                                                                                                                                                                       |     |                 |     |        |              |              |           |          |      |                    |                 |      |                    |              |    |                   |                     |    |                                                                                   |                                                                                                                                                                                                                                                                                                                                                                                                                                                                                                                                                                                                                                                                                                                                                                                                                                                                                                                                                                             |              |                                                                                      |                                                                                                                                                                                                                                                                                                                                                                                                                                                                                                                                                                                                                                                                                                                                                                                                                                                                                                                                                                                  |                                                                                                                               |                        |                                                                                                                                                                                                                                                                                                                                                                                                                                                                                     |                                                                                             |                                     |                                                                                                                                                                                                                                                                                                                                                                                                                  |                                                                                                |                       |                                                                                                                                                                                                                               |                                            |       |   |                   |                  |           |                                |                                                                                                                                                                                                                                                                                                                                                                                                                                                              |                                                                                                                                                   |
| Ethnicity          | -                                                                                                                                                                                                                                                                                                                                                                                                                                                                                   | -                                                                                                                                                                                                                                                                                                                                                                                                                                                                                                                                                                                                                                        |     |                 |     |        |              |              |           |          |      |                    |                 |      |                    |              |    |                   |                     |    |                                                                                   |                                                                                                                                                                                                                                                                                                                                                                                                                                                                                                                                                                                                                                                                                                                                                                                                                                                                                                                                                                             |              |                                                                                      |                                                                                                                                                                                                                                                                                                                                                                                                                                                                                                                                                                                                                                                                                                                                                                                                                                                                                                                                                                                  |                                                                                                                               |                        |                                                                                                                                                                                                                                                                                                                                                                                                                                                                                     |                                                                                             |                                     |                                                                                                                                                                                                                                                                                                                                                                                                                  |                                                                                                |                       |                                                                                                                                                                                                                               |                                            |       |   |                   |                  |           |                                |                                                                                                                                                                                                                                                                                                                                                                                                                                                              |                                                                                                                                                   |
| Living arrangement | -                                                                                                                                                                                                                                                                                                                                                                                                                                                                                   | -                                                                                                                                                                                                                                                                                                                                                                                                                                                                                                                                                                                                                                        |     |                 |     |        |              |              |           |          |      |                    |                 |      |                    |              |    |                   |                     |    |                                                                                   |                                                                                                                                                                                                                                                                                                                                                                                                                                                                                                                                                                                                                                                                                                                                                                                                                                                                                                                                                                             |              |                                                                                      |                                                                                                                                                                                                                                                                                                                                                                                                                                                                                                                                                                                                                                                                                                                                                                                                                                                                                                                                                                                  |                                                                                                                               |                        |                                                                                                                                                                                                                                                                                                                                                                                                                                                                                     |                                                                                             |                                     |                                                                                                                                                                                                                                                                                                                                                                                                                  |                                                                                                |                       |                                                                                                                                                                                                                               |                                            |       |   |                   |                  |           |                                |                                                                                                                                                                                                                                                                                                                                                                                                                                                              |                                                                                                                                                   |
| Employment status  | -                                                                                                                                                                                                                                                                                                                                                                                                                                                                                   | -                                                                                                                                                                                                                                                                                                                                                                                                                                                                                                                                                                                                                                        |     |                 |     |        |              |              |           |          |      |                    |                 |      |                    |              |    |                   |                     |    |                                                                                   |                                                                                                                                                                                                                                                                                                                                                                                                                                                                                                                                                                                                                                                                                                                                                                                                                                                                                                                                                                             |              |                                                                                      |                                                                                                                                                                                                                                                                                                                                                                                                                                                                                                                                                                                                                                                                                                                                                                                                                                                                                                                                                                                  |                                                                                                                               |                        |                                                                                                                                                                                                                                                                                                                                                                                                                                                                                     |                                                                                             |                                     |                                                                                                                                                                                                                                                                                                                                                                                                                  |                                                                                                |                       |                                                                                                                                                                                                                               |                                            |       |   |                   |                  |           |                                |                                                                                                                                                                                                                                                                                                                                                                                                                                                              |                                                                                                                                                   |
| Name               | Ways to Wellbeing, York                                                                                                                                                                                                                                                                                                                                                                                                                                                             |                                                                                                                                                                                                                                                                                                                                                                                                                                                                                                                                                                                                                                          |     |                 |     |        |              |              |           |          |      |                    |                 |      |                    |              |    |                   |                     |    |                                                                                   |                                                                                                                                                                                                                                                                                                                                                                                                                                                                                                                                                                                                                                                                                                                                                                                                                                                                                                                                                                             |              |                                                                                      |                                                                                                                                                                                                                                                                                                                                                                                                                                                                                                                                                                                                                                                                                                                                                                                                                                                                                                                                                                                  |                                                                                                                               |                        |                                                                                                                                                                                                                                                                                                                                                                                                                                                                                     |                                                                                             |                                     |                                                                                                                                                                                                                                                                                                                                                                                                                  |                                                                                                |                       |                                                                                                                                                                                                                               |                                            |       |   |                   |                  |           |                                |                                                                                                                                                                                                                                                                                                                                                                                                                                                              |                                                                                                                                                   |
| Why                | It tackles increasing pressure and stretched resources of GPs by connecting people with voluntary and community organisations                                                                                                                                                                                                                                                                                                                                                       |                                                                                                                                                                                                                                                                                                                                                                                                                                                                                                                                                                                                                                          |     |                 |     |        |              |              |           |          |      |                    |                 |      |                    |              |    |                   |                     |    |                                                                                   |                                                                                                                                                                                                                                                                                                                                                                                                                                                                                                                                                                                                                                                                                                                                                                                                                                                                                                                                                                             |              |                                                                                      |                                                                                                                                                                                                                                                                                                                                                                                                                                                                                                                                                                                                                                                                                                                                                                                                                                                                                                                                                                                  |                                                                                                                               |                        |                                                                                                                                                                                                                                                                                                                                                                                                                                                                                     |                                                                                             |                                     |                                                                                                                                                                                                                                                                                                                                                                                                                  |                                                                                                |                       |                                                                                                                                                                                                                               |                                            |       |   |                   |                  |           |                                |                                                                                                                                                                                                                                                                                                                                                                                                                                                              |                                                                                                                                                   |
| What               | Identify potential networks of support, work with individuals to achieve the outcomes that are important to them, identify and challenge barriers to improving wellbeing. Help individuals to make simple changes to their lifestyle and their home environment, to improve independence and quality of life, help identify their strengths and develop new ways of doing things.<br><br>Offer a volunteering pathway to facilitate embedding of new skills and confidence building |                                                                                                                                                                                                                                                                                                                                                                                                                                                                                                                                                                                                                                          |     |                 |     |        |              |              |           |          |      |                    |                 |      |                    |              |    |                   |                     |    |                                                                                   |                                                                                                                                                                                                                                                                                                                                                                                                                                                                                                                                                                                                                                                                                                                                                                                                                                                                                                                                                                             |              |                                                                                      |                                                                                                                                                                                                                                                                                                                                                                                                                                                                                                                                                                                                                                                                                                                                                                                                                                                                                                                                                                                  |                                                                                                                               |                        |                                                                                                                                                                                                                                                                                                                                                                                                                                                                                     |                                                                                             |                                     |                                                                                                                                                                                                                                                                                                                                                                                                                  |                                                                                                |                       |                                                                                                                                                                                                                               |                                            |       |   |                   |                  |           |                                |                                                                                                                                                                                                                                                                                                                                                                                                                                                              |                                                                                                                                                   |
| Who provided       | Ways to Wellbeing (W2W) coordinator                                                                                                                                                                                                                                                                                                                                                                                                                                                 |                                                                                                                                                                                                                                                                                                                                                                                                                                                                                                                                                                                                                                          |     |                 |     |        |              |              |           |          |      |                    |                 |      |                    |              |    |                   |                     |    |                                                                                   |                                                                                                                                                                                                                                                                                                                                                                                                                                                                                                                                                                                                                                                                                                                                                                                                                                                                                                                                                                             |              |                                                                                      |                                                                                                                                                                                                                                                                                                                                                                                                                                                                                                                                                                                                                                                                                                                                                                                                                                                                                                                                                                                  |                                                                                                                               |                        |                                                                                                                                                                                                                                                                                                                                                                                                                                                                                     |                                                                                             |                                     |                                                                                                                                                                                                                                                                                                                                                                                                                  |                                                                                                |                       |                                                                                                                                                                                                                               |                                            |       |   |                   |                  |           |                                |                                                                                                                                                                                                                                                                                                                                                                                                                                                              |                                                                                                                                                   |

|                   |                                |                     |                                                            |    |  |                      |                                                                                                                                                                                                                                                       |     |            |       |                     |                   |   |           |                                |                                                                                                                                                                                                                       |  |
|-------------------|--------------------------------|---------------------|------------------------------------------------------------|----|--|----------------------|-------------------------------------------------------------------------------------------------------------------------------------------------------------------------------------------------------------------------------------------------------|-----|------------|-------|---------------------|-------------------|---|-----------|--------------------------------|-----------------------------------------------------------------------------------------------------------------------------------------------------------------------------------------------------------------------|--|
|                   |                                | Other               | Referral reason<br>emotional and<br>mental well<br>being % | 56 |  |                      | <table border="1"> <tr> <td>How</td> <td>One-to-one</td> </tr> <tr> <td>Where</td> <td>Within GP surgeries</td> </tr> <tr> <td>When and How Much</td> <td>-</td> </tr> <tr> <td>Tailoring</td> <td>Personalized, flexible program</td> </tr> </table> | How | One-to-one | Where | Within GP surgeries | When and How Much | - | Tailoring | Personalized, flexible program | <p>Process of care measures:</p> <ul style="list-style-type: none"> <li>- GP appointments before and 3 months later</li> <li>- Number of volunteers and hours given</li> <li>- Social Return on Investment</li> </ul> |  |
| How               | One-to-one                     |                     |                                                            |    |  |                      |                                                                                                                                                                                                                                                       |     |            |       |                     |                   |   |           |                                |                                                                                                                                                                                                                       |  |
| Where             | Within GP surgeries            |                     |                                                            |    |  |                      |                                                                                                                                                                                                                                                       |     |            |       |                     |                   |   |           |                                |                                                                                                                                                                                                                       |  |
| When and How Much | -                              |                     |                                                            |    |  |                      |                                                                                                                                                                                                                                                       |     |            |       |                     |                   |   |           |                                |                                                                                                                                                                                                                       |  |
| Tailoring         | Personalized, flexible program |                     |                                                            |    |  |                      |                                                                                                                                                                                                                                                       |     |            |       |                     |                   |   |           |                                |                                                                                                                                                                                                                       |  |
|                   |                                | Population: Unclear |                                                            |    |  | Intervention: Medium |                                                                                                                                                                                                                                                       |     |            |       |                     |                   |   |           |                                |                                                                                                                                                                                                                       |  |
